# Supplementary material for: Feature sequence-based genome mining uncovers the hidden diversity of bacterial siderophore pathways
Source: eLife journal article supplement (doi:10.7554/elife.96719), 2024-05-01

Pyoverdines analysed for the bioinformatic pipeline verification

| Pyoverdine ID | MS / MS profiles available from                                                                                      |                                                                                                            |
|---------------|----------------------------------------------------------------------------------------------------------------------|------------------------------------------------------------------------------------------------------------|
|               | Rehm 2022 ABC<br><a href="https://doi.org/10.1007/s00216-022-03907-w">https://doi.org/10.1007/s00216-022-03907-w</a> | Gu 2024 eLife<br><a href="https://doi.org/10.7554/eLife.96719.1">https://doi.org/10.7554/eLife.96719.1</a> |
| 3A06          | 3A06                                                                                                                 | x                                                                                                          |
| 3B19          | 3B19                                                                                                                 | x                                                                                                          |
| 3G07          | 3G07                                                                                                                 | x                                                                                                          |
| s3b09         | s3b09                                                                                                                | x                                                                                                          |
| s3c13         | s3c13                                                                                                                | x                                                                                                          |
| s3e20         | s3e20                                                                                                                | x                                                                                                          |
| 3A13          | x                                                                                                                    | 3A13                                                                                                       |
| 3A18          | x                                                                                                                    | 3A18                                                                                                       |
| 3B09          | x                                                                                                                    | 3B09                                                                                                       |
| 3C06          | x                                                                                                                    | 3C06                                                                                                       |
| 3C14          | x                                                                                                                    | 3C14                                                                                                       |
| 3D03          | x                                                                                                                    | 3D03                                                                                                       |
| 3E13          | x                                                                                                                    | 3E13                                                                                                       |
| s3a07         | x                                                                                                                    | s3a07                                                                                                      |
| s3a19         | x                                                                                                                    | s3a19                                                                                                      |
| s3b02         | x                                                                                                                    | s3b02                                                                                                      |
| s3d06         | x                                                                                                                    | s3d06                                                                                                      |
| s3e01         | x                                                                                                                    | s3e01                                                                                                      |
| s3e11         | x                                                                                                                    | s3e11                                                                                                      |
| s3e15         | x                                                                                                                    | s3e15                                                                                                      |

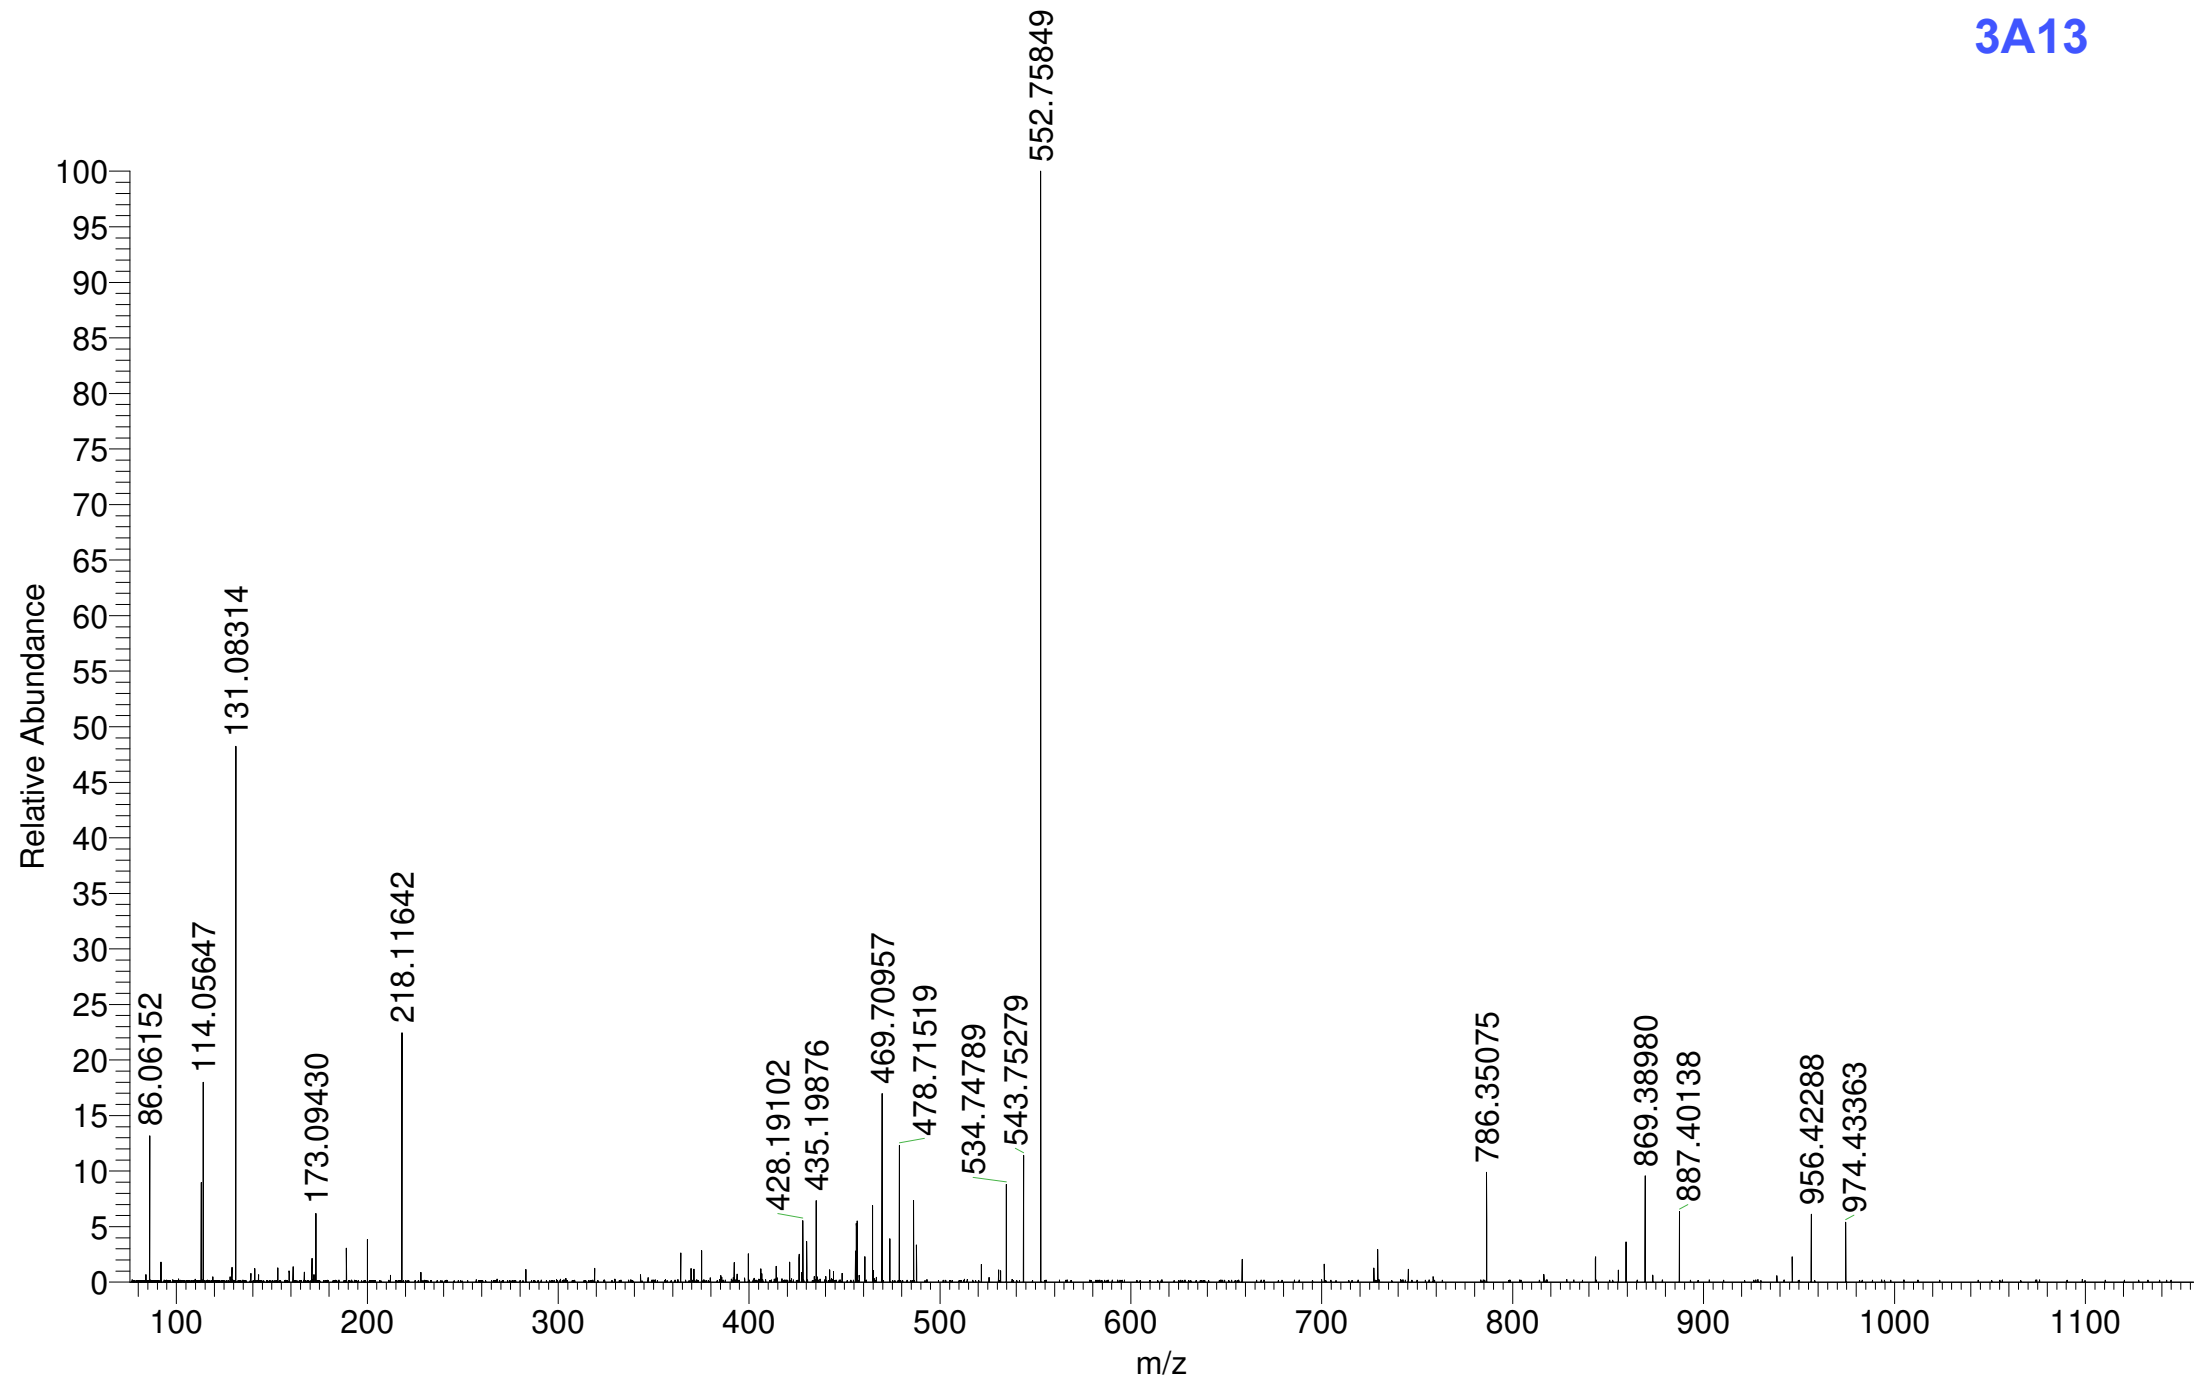

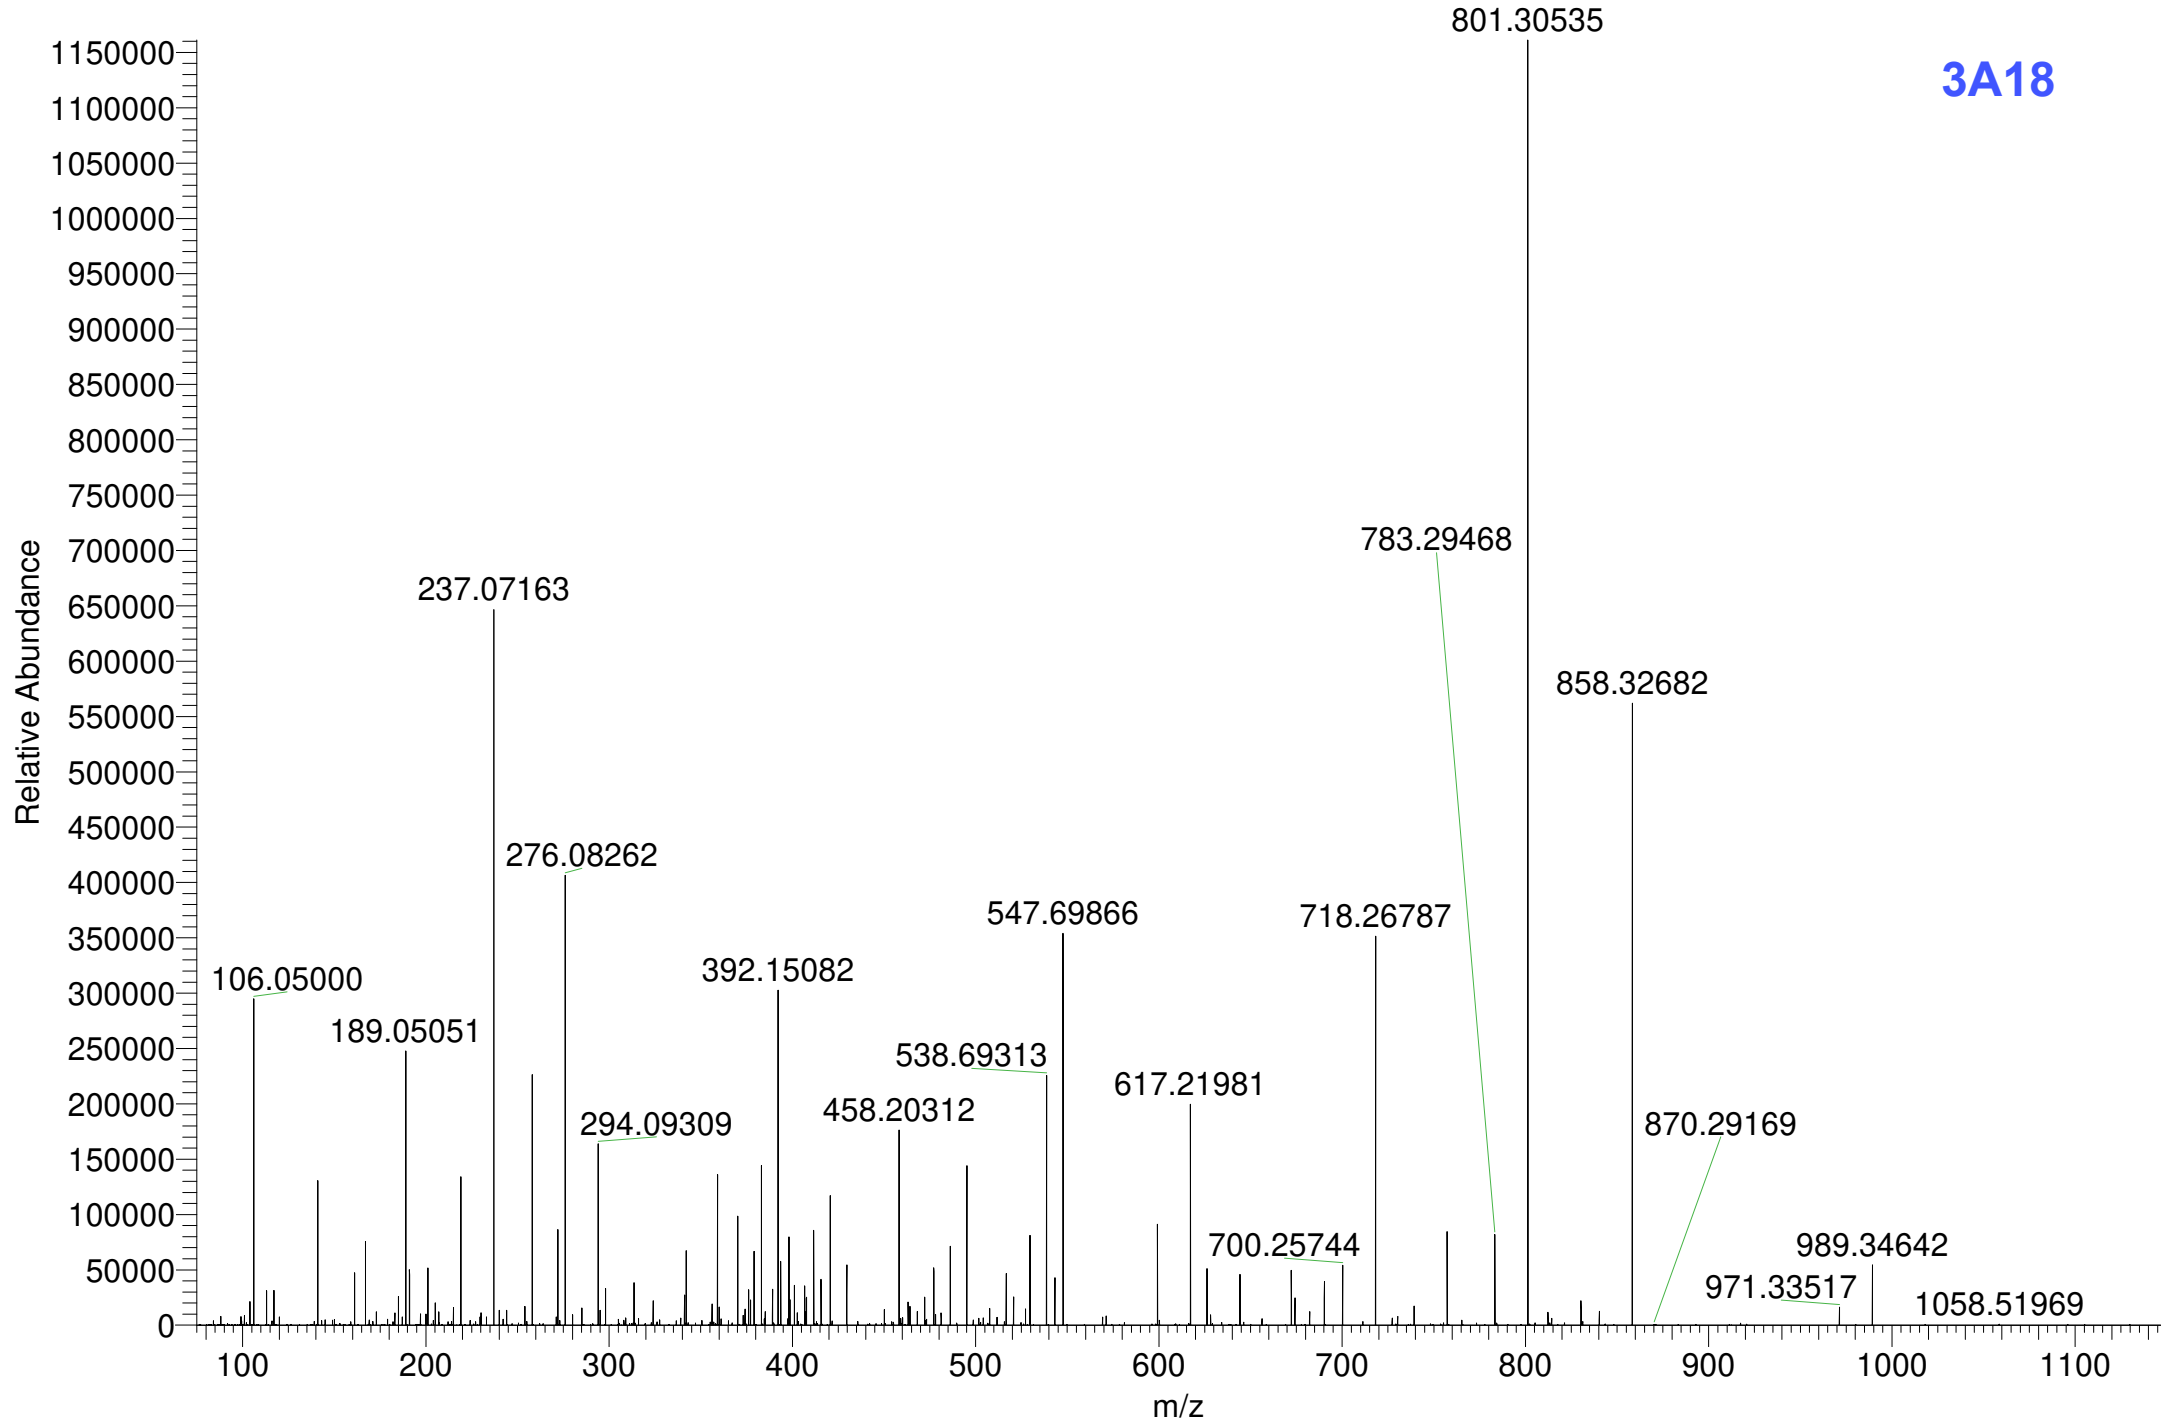

3B09

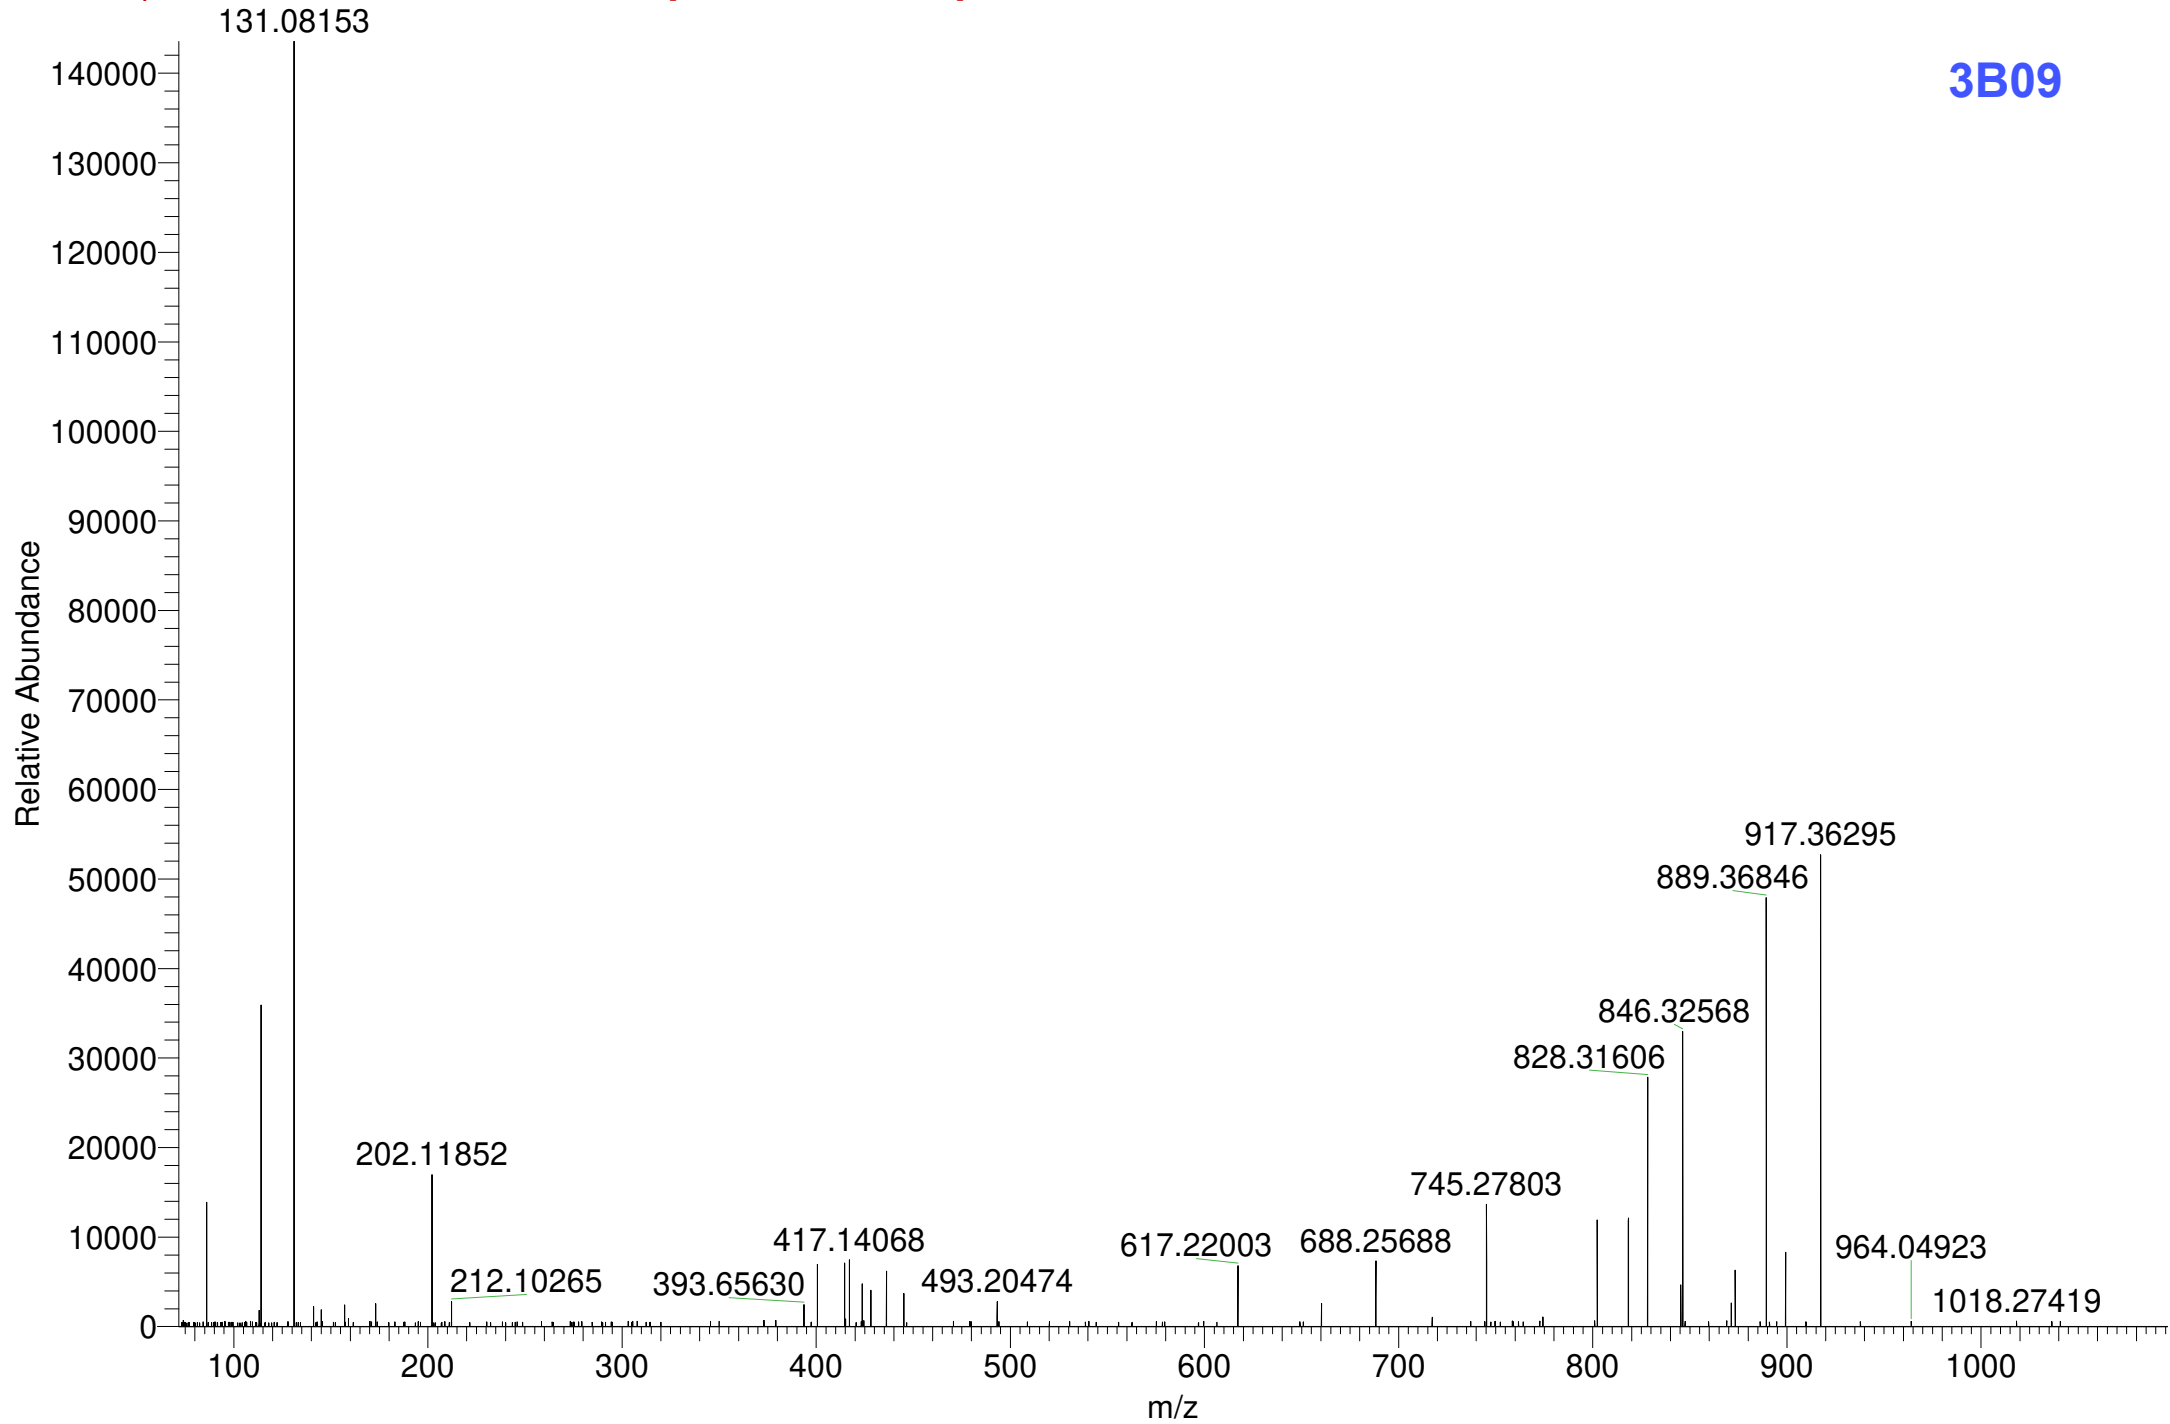

3C06

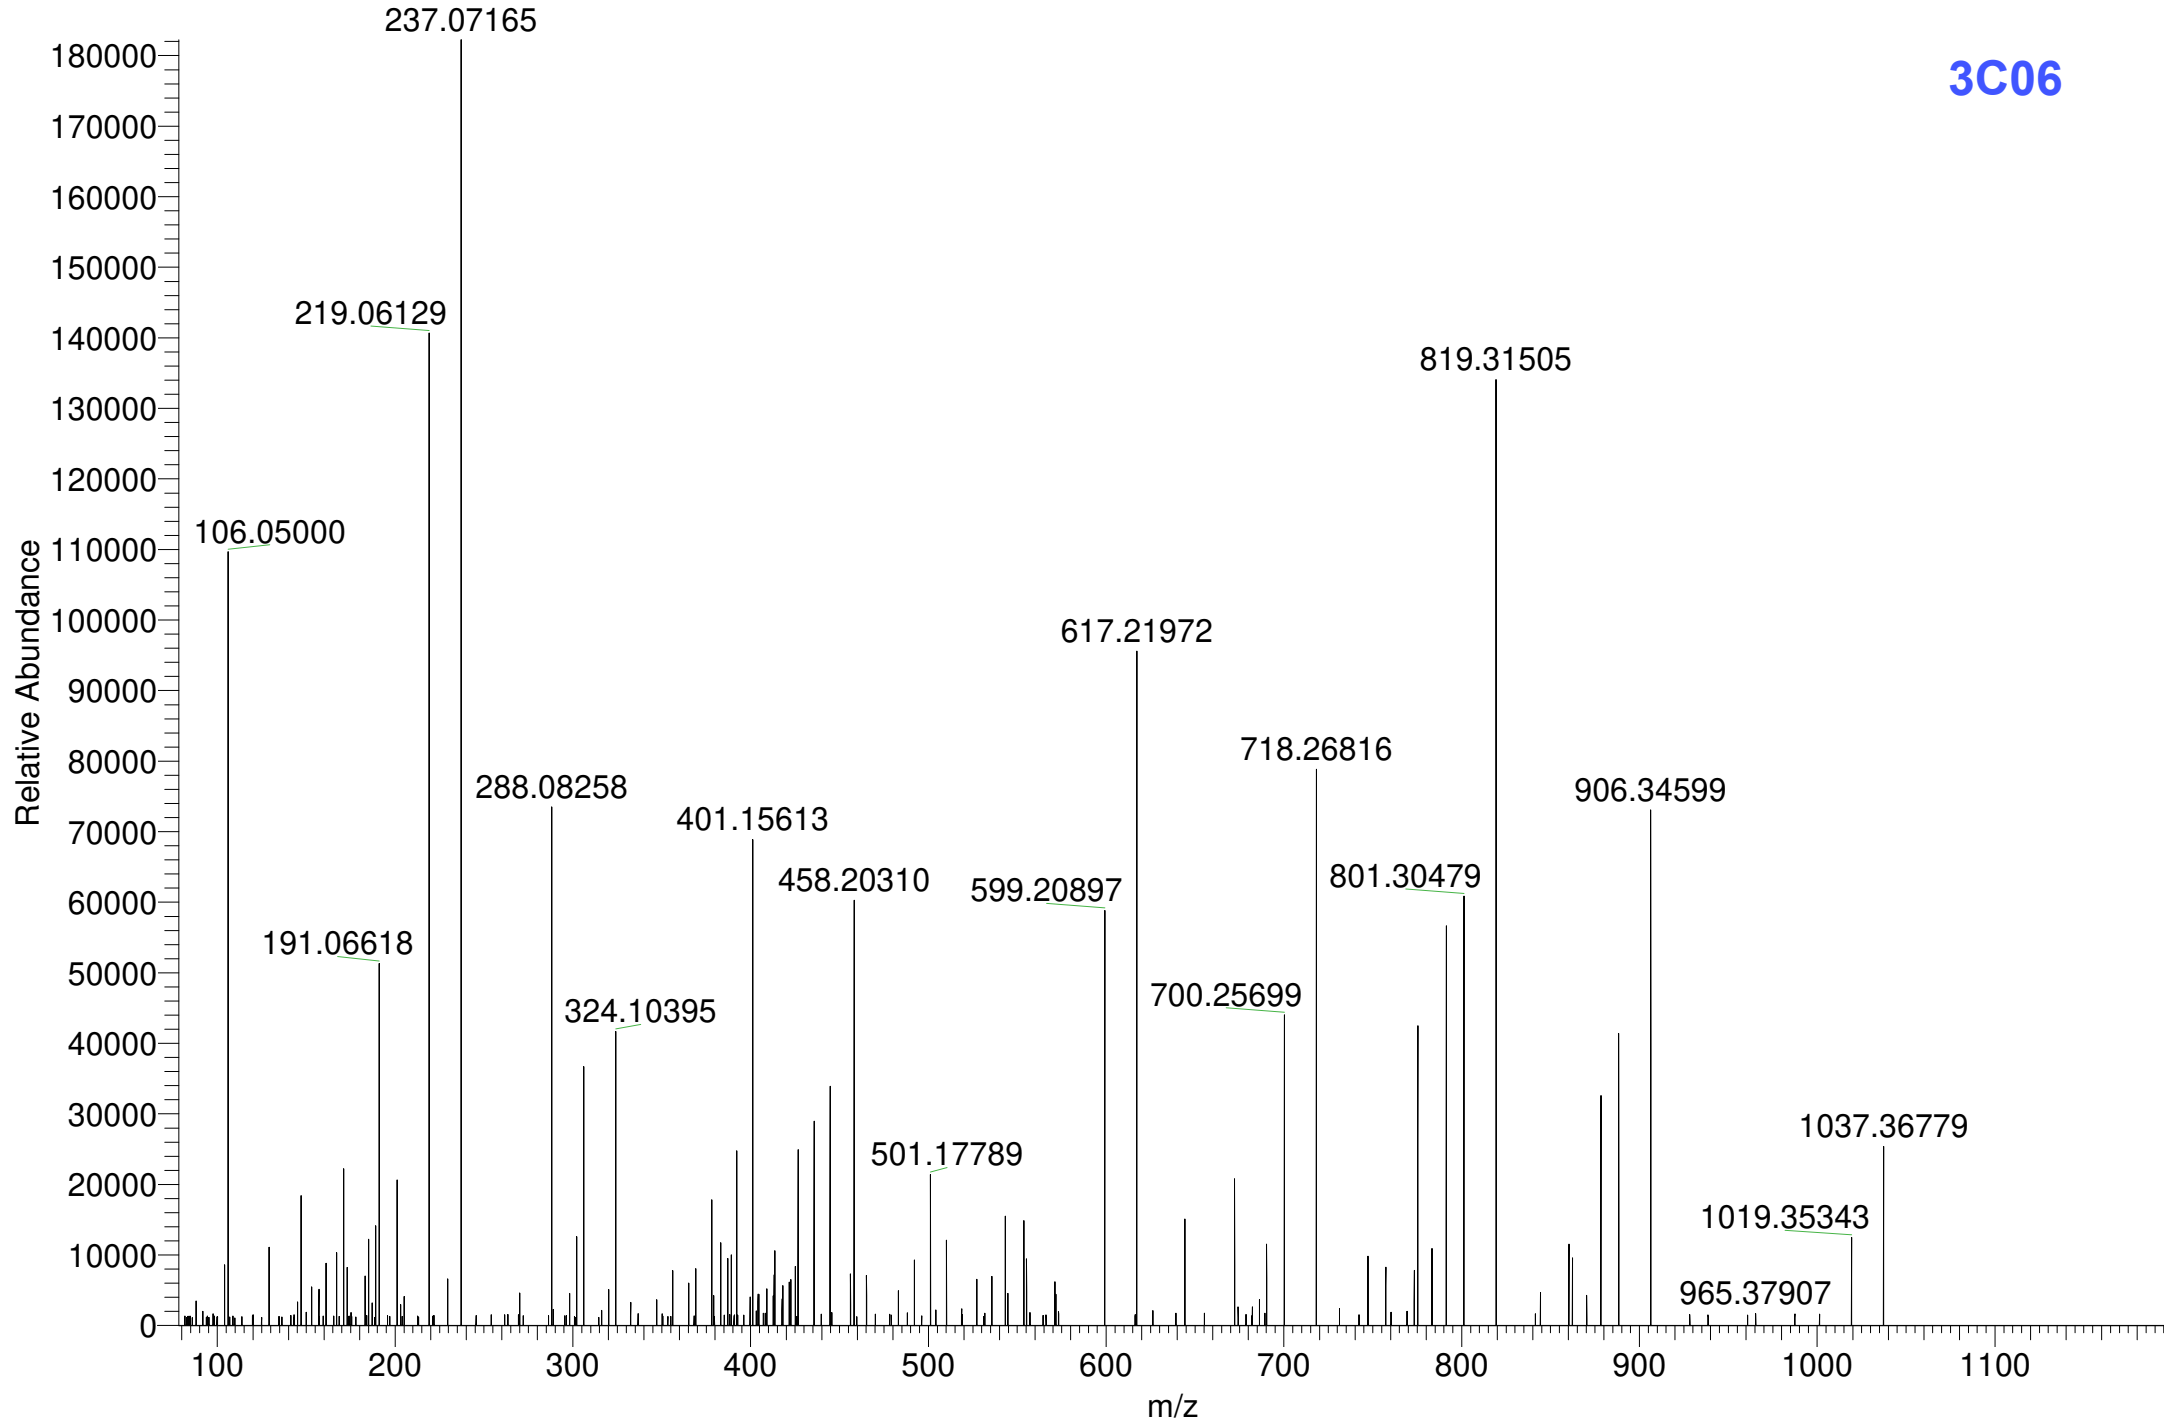

3C14

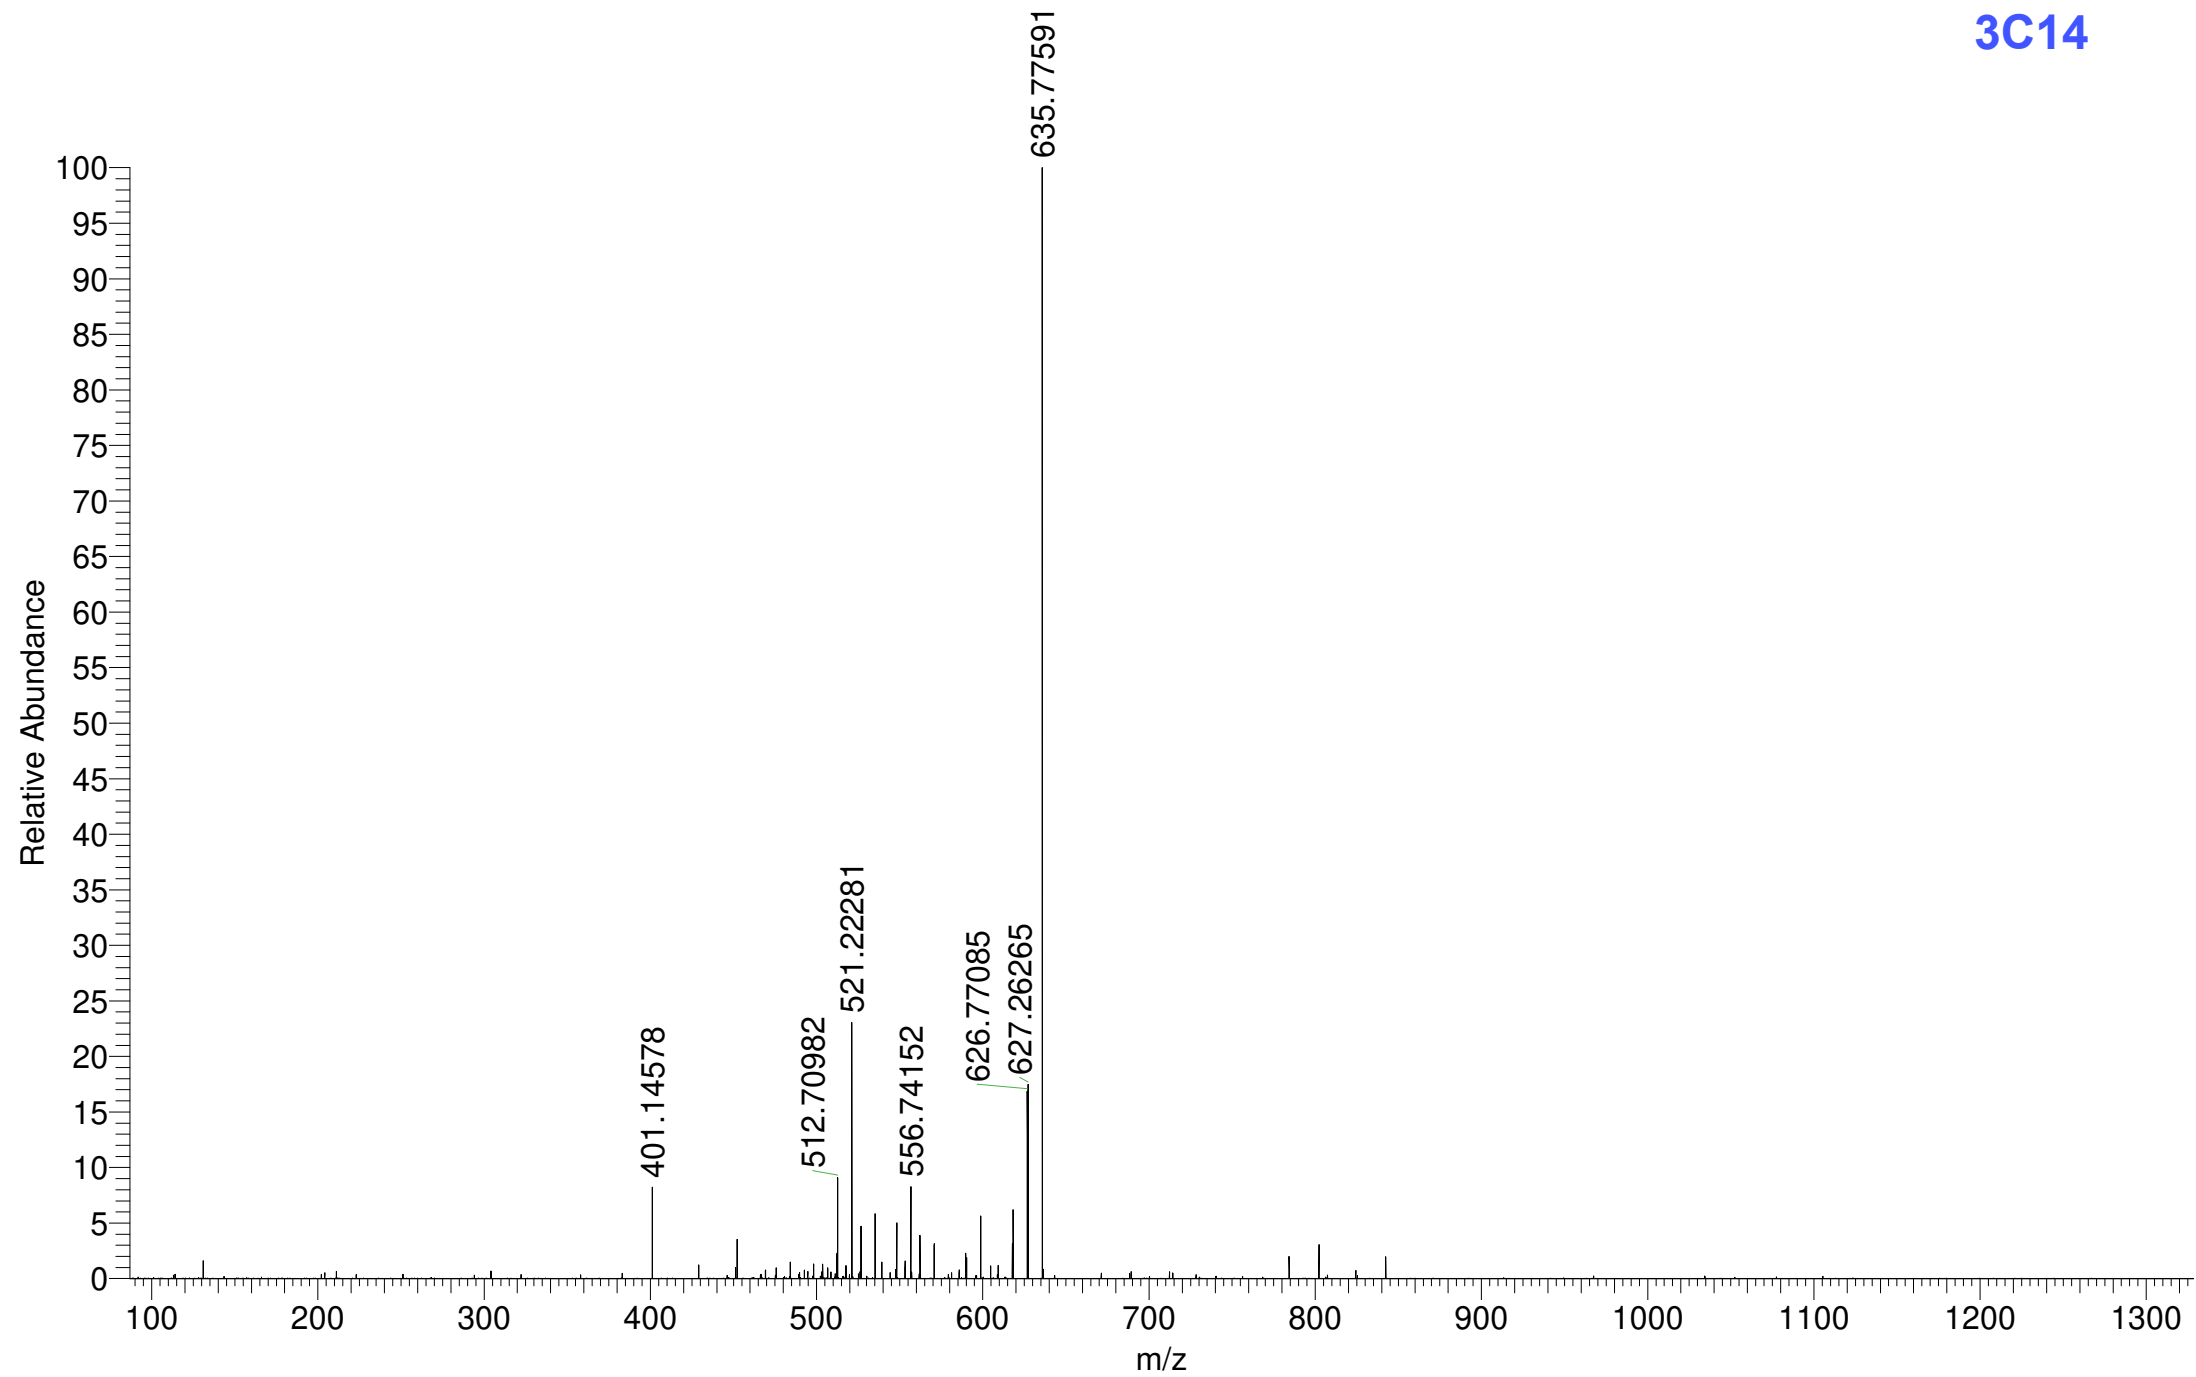

3D03

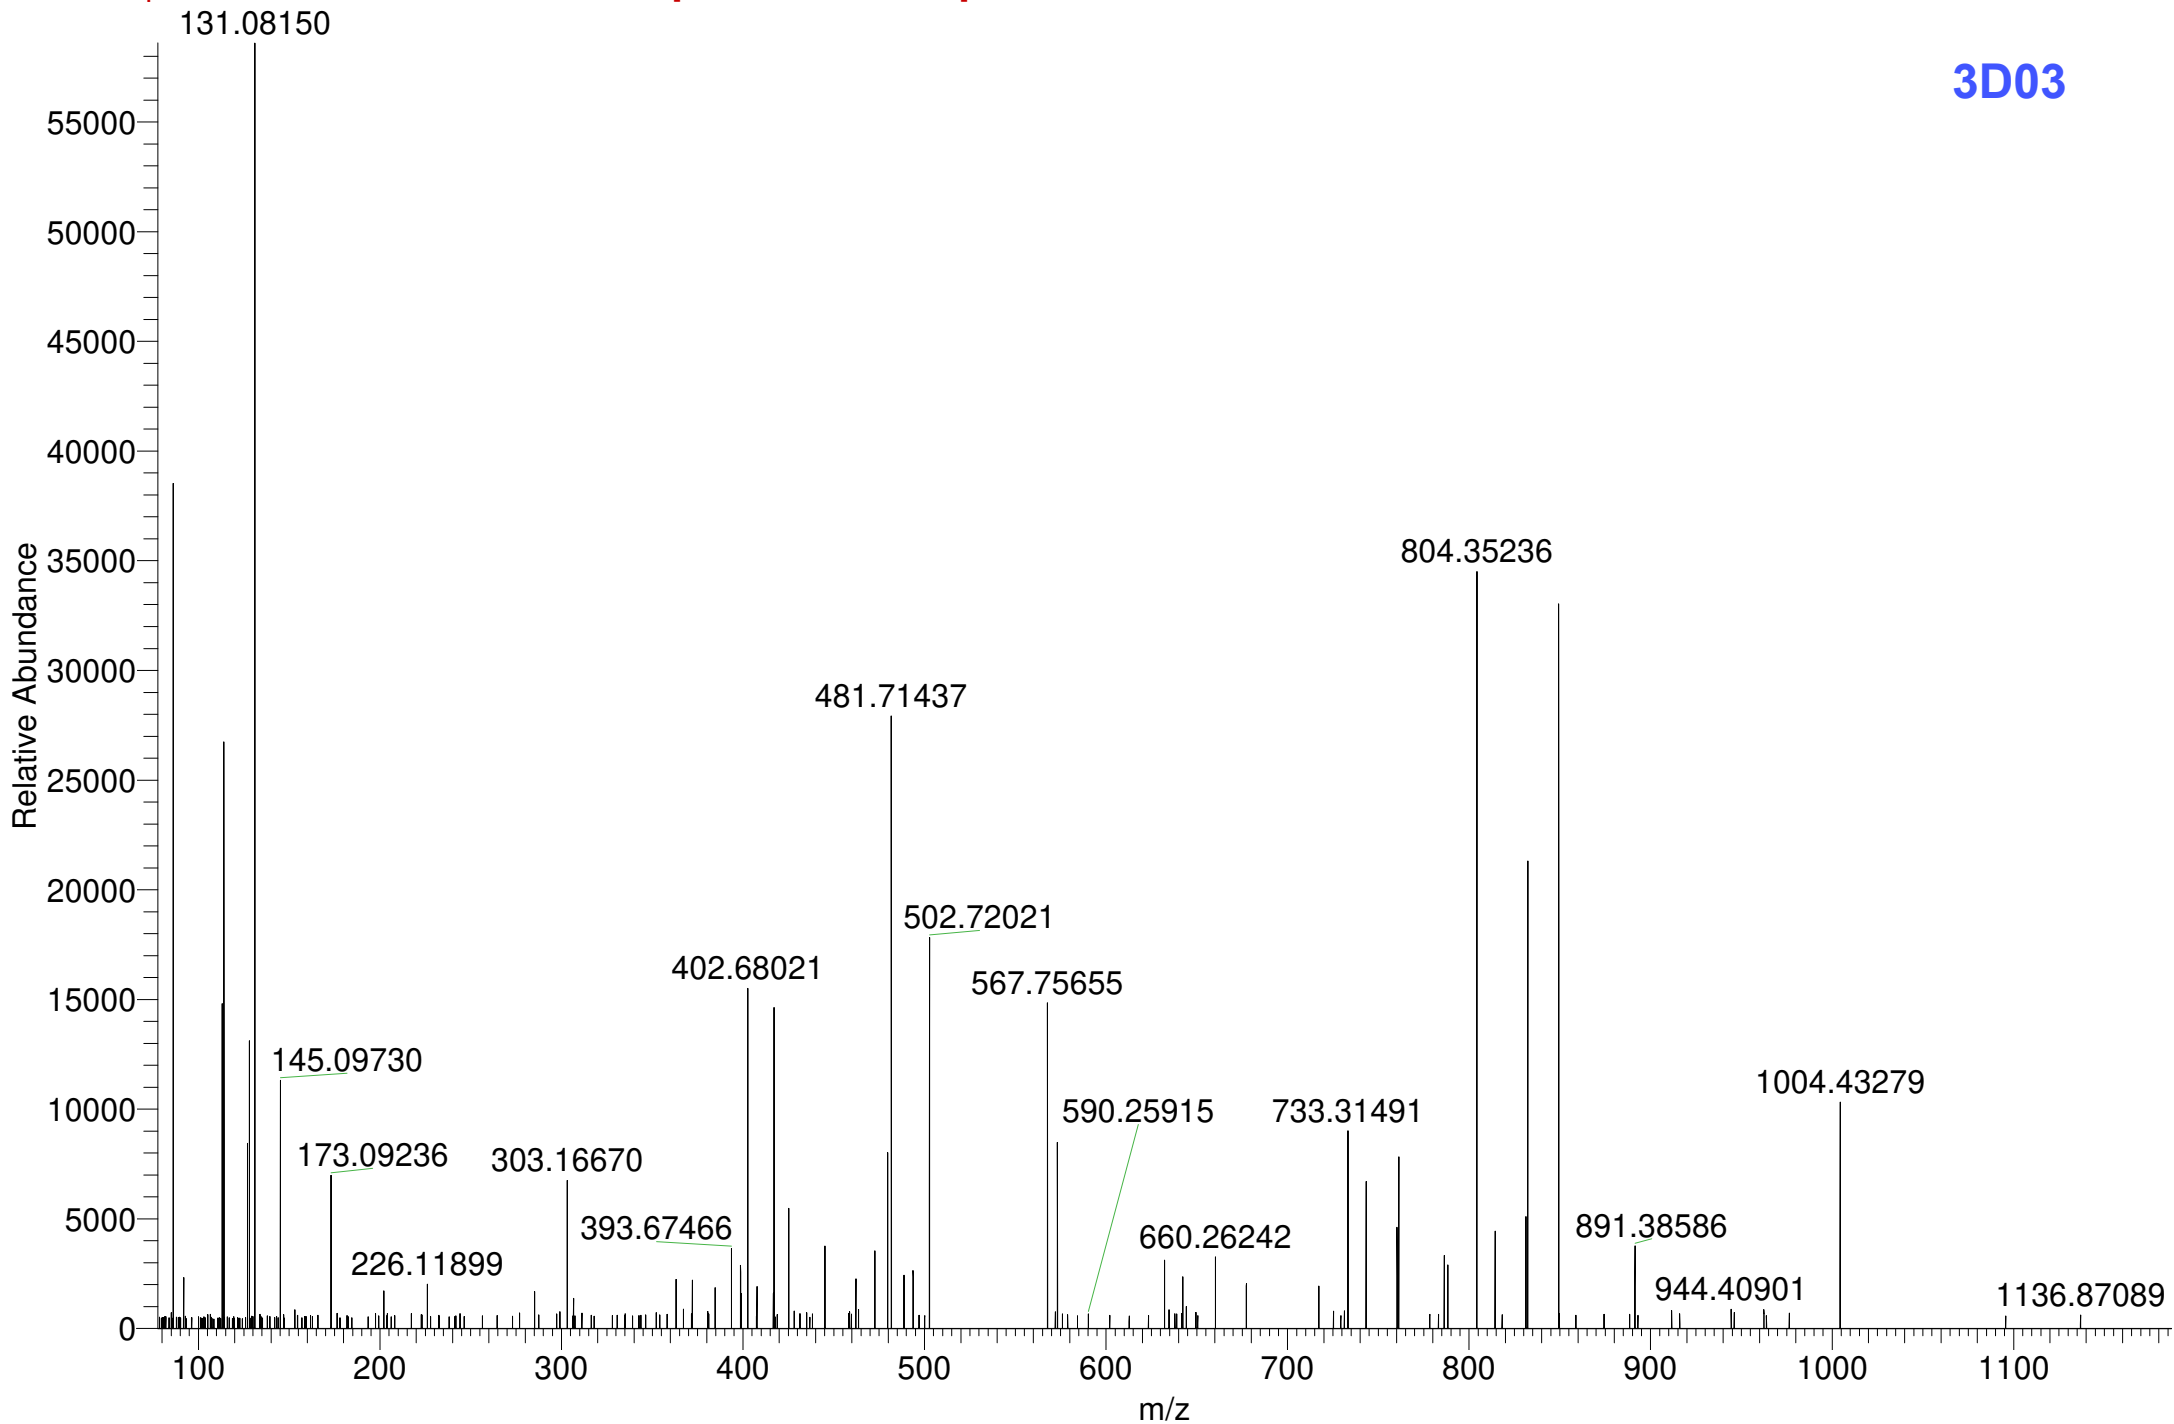

3E13

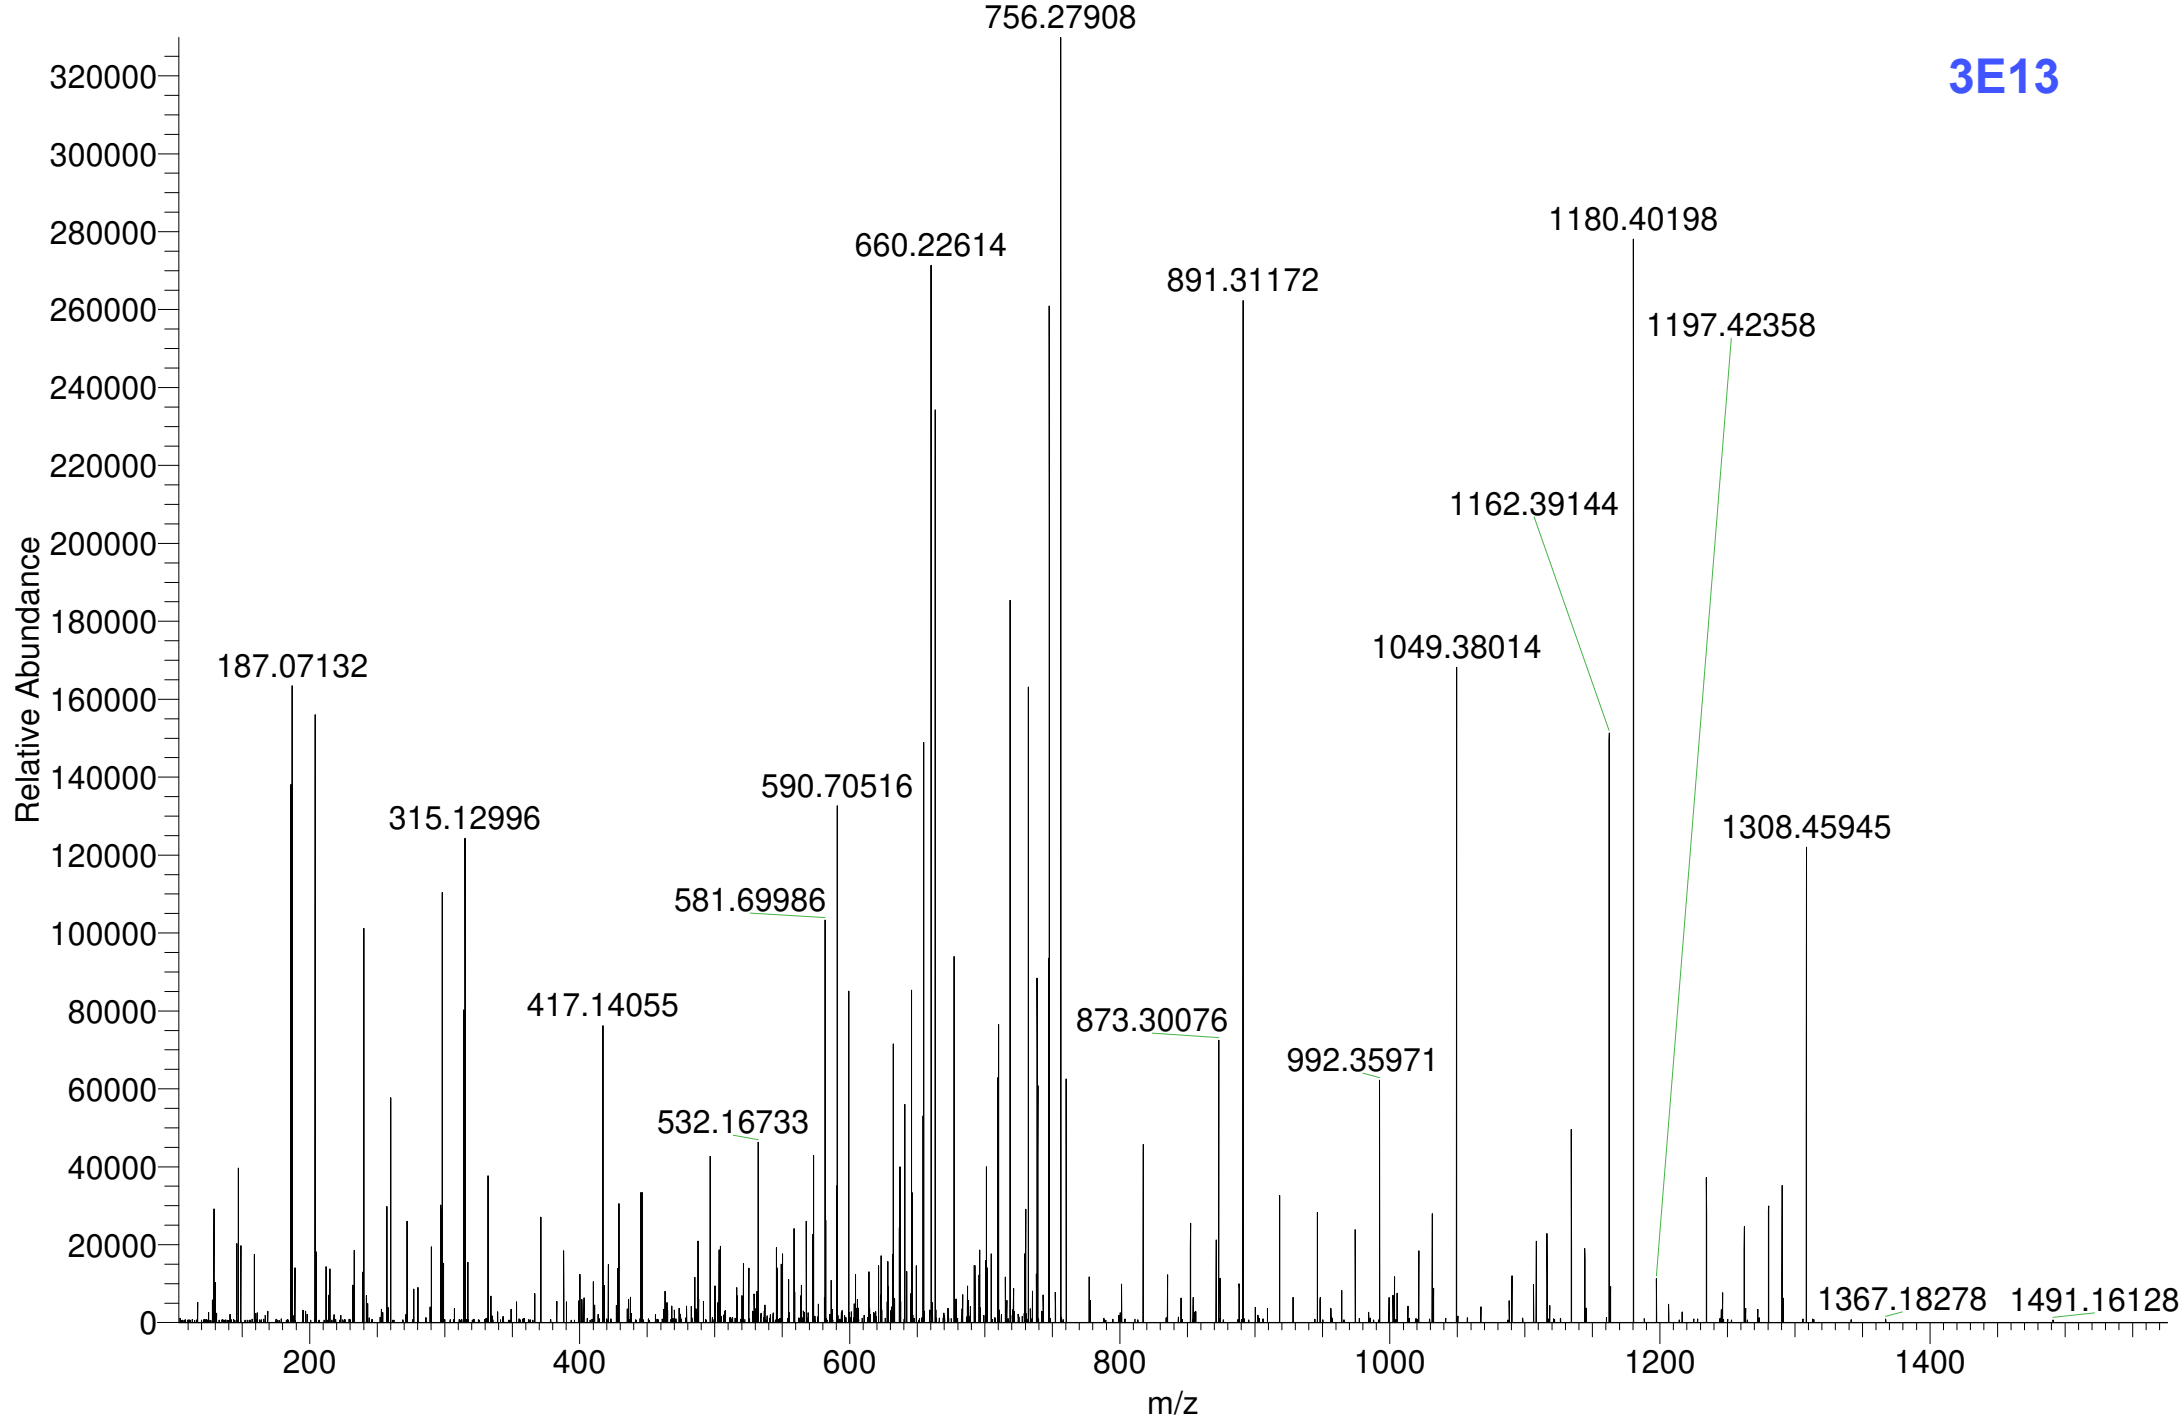



s3a19 and  
s3e11

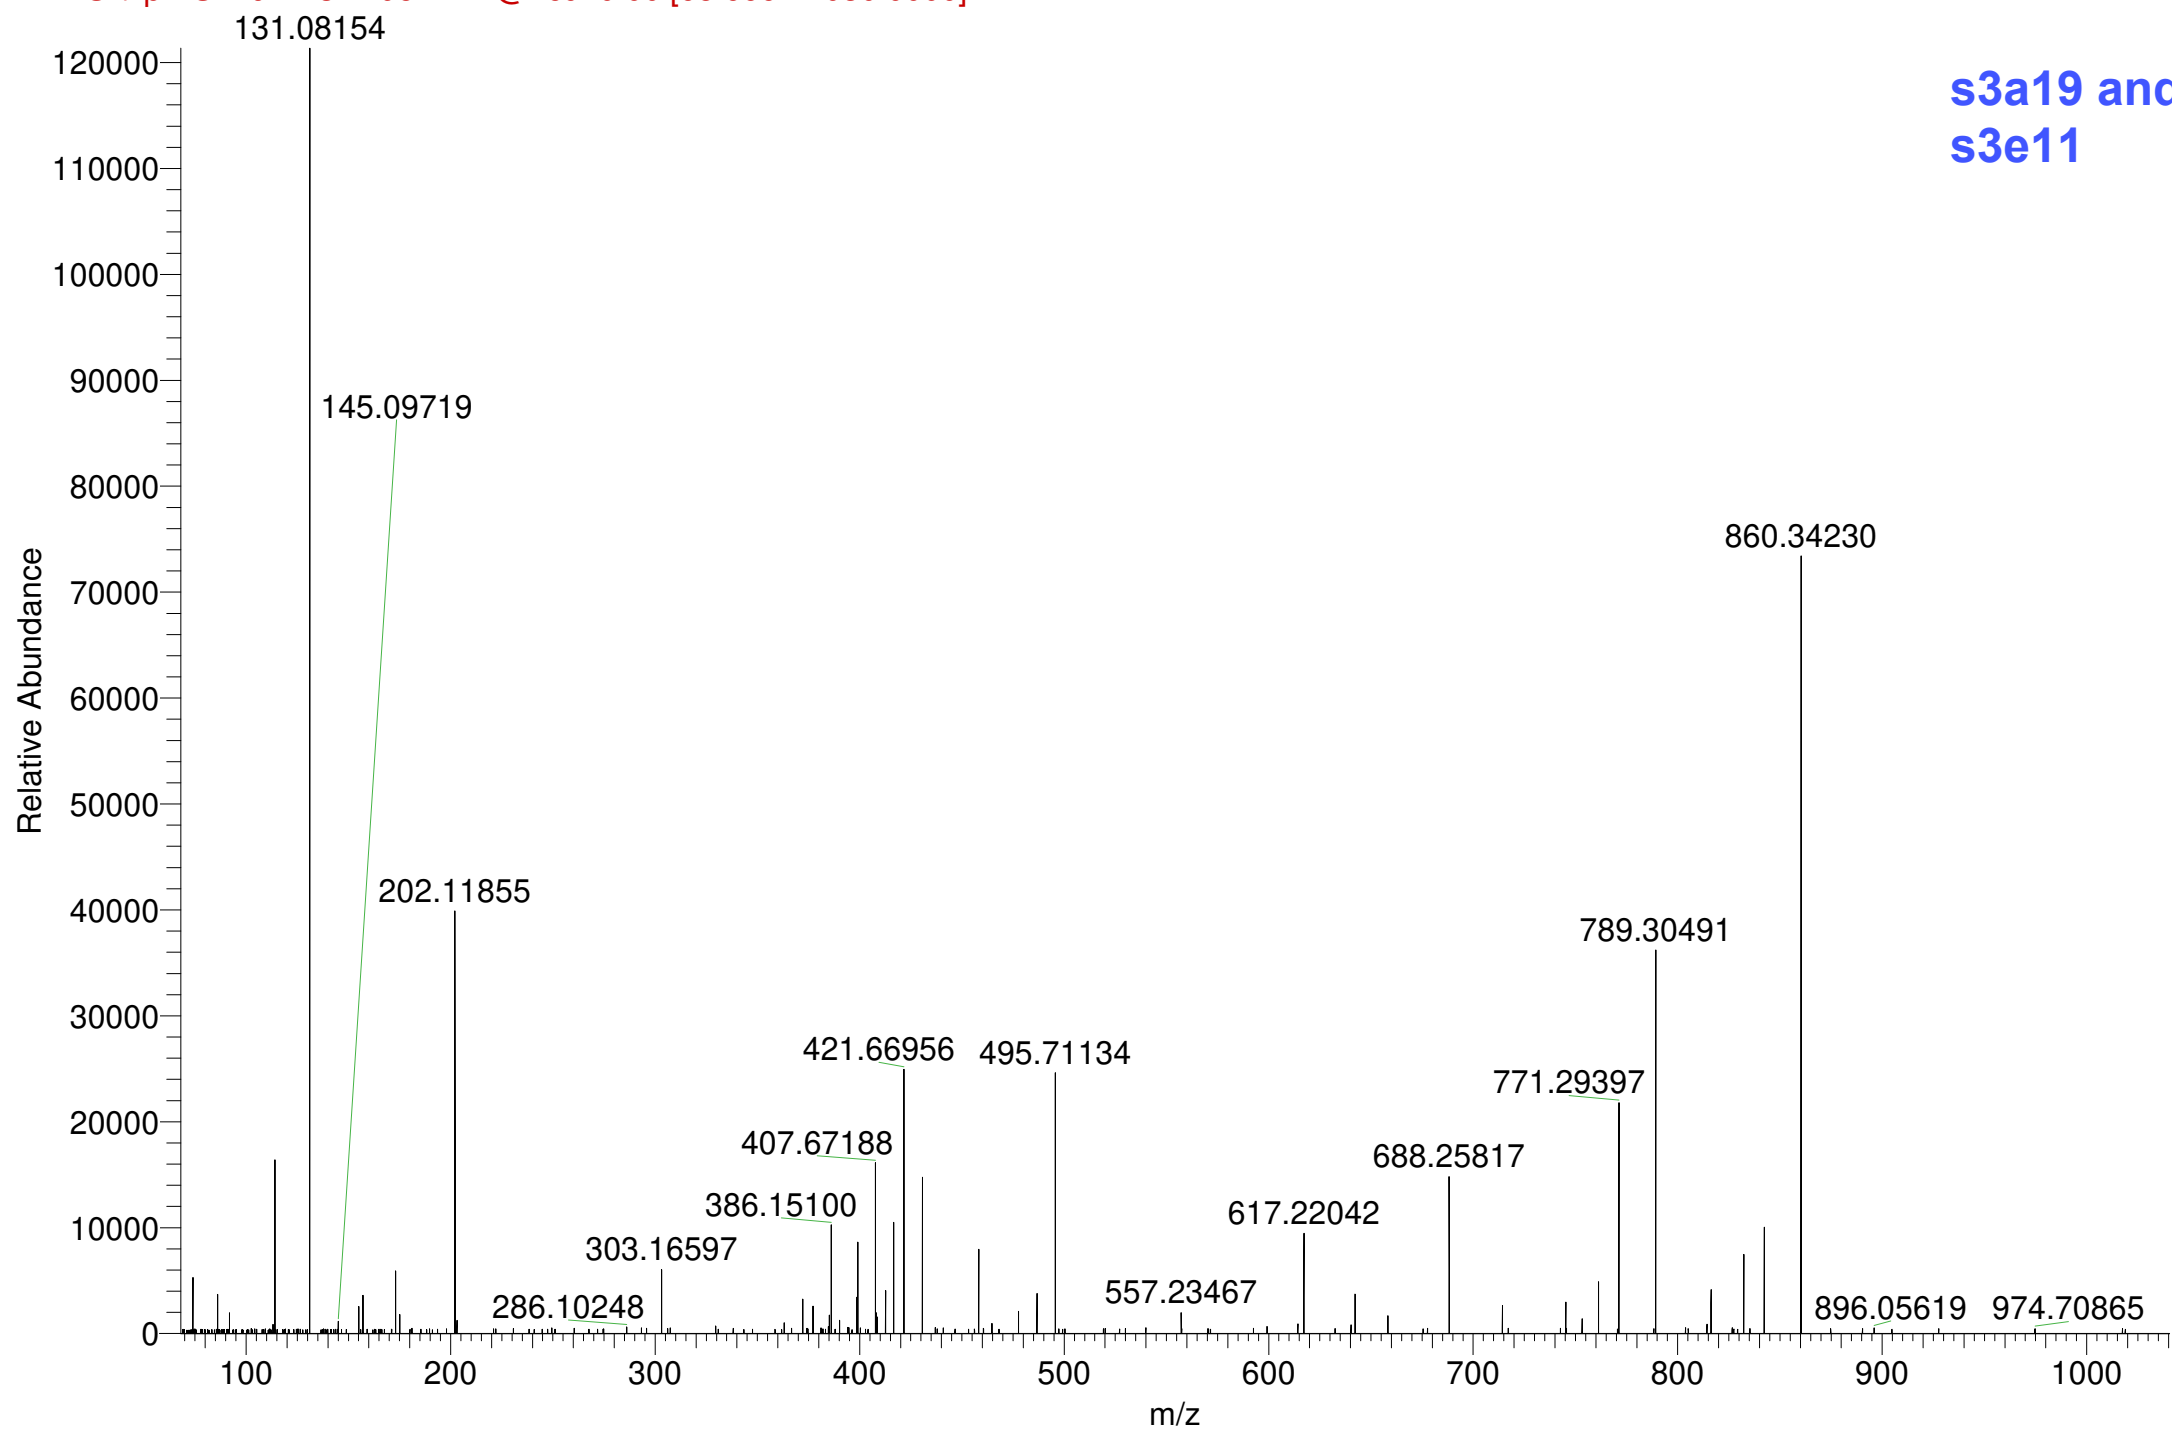

s3b02 and  
s3a07

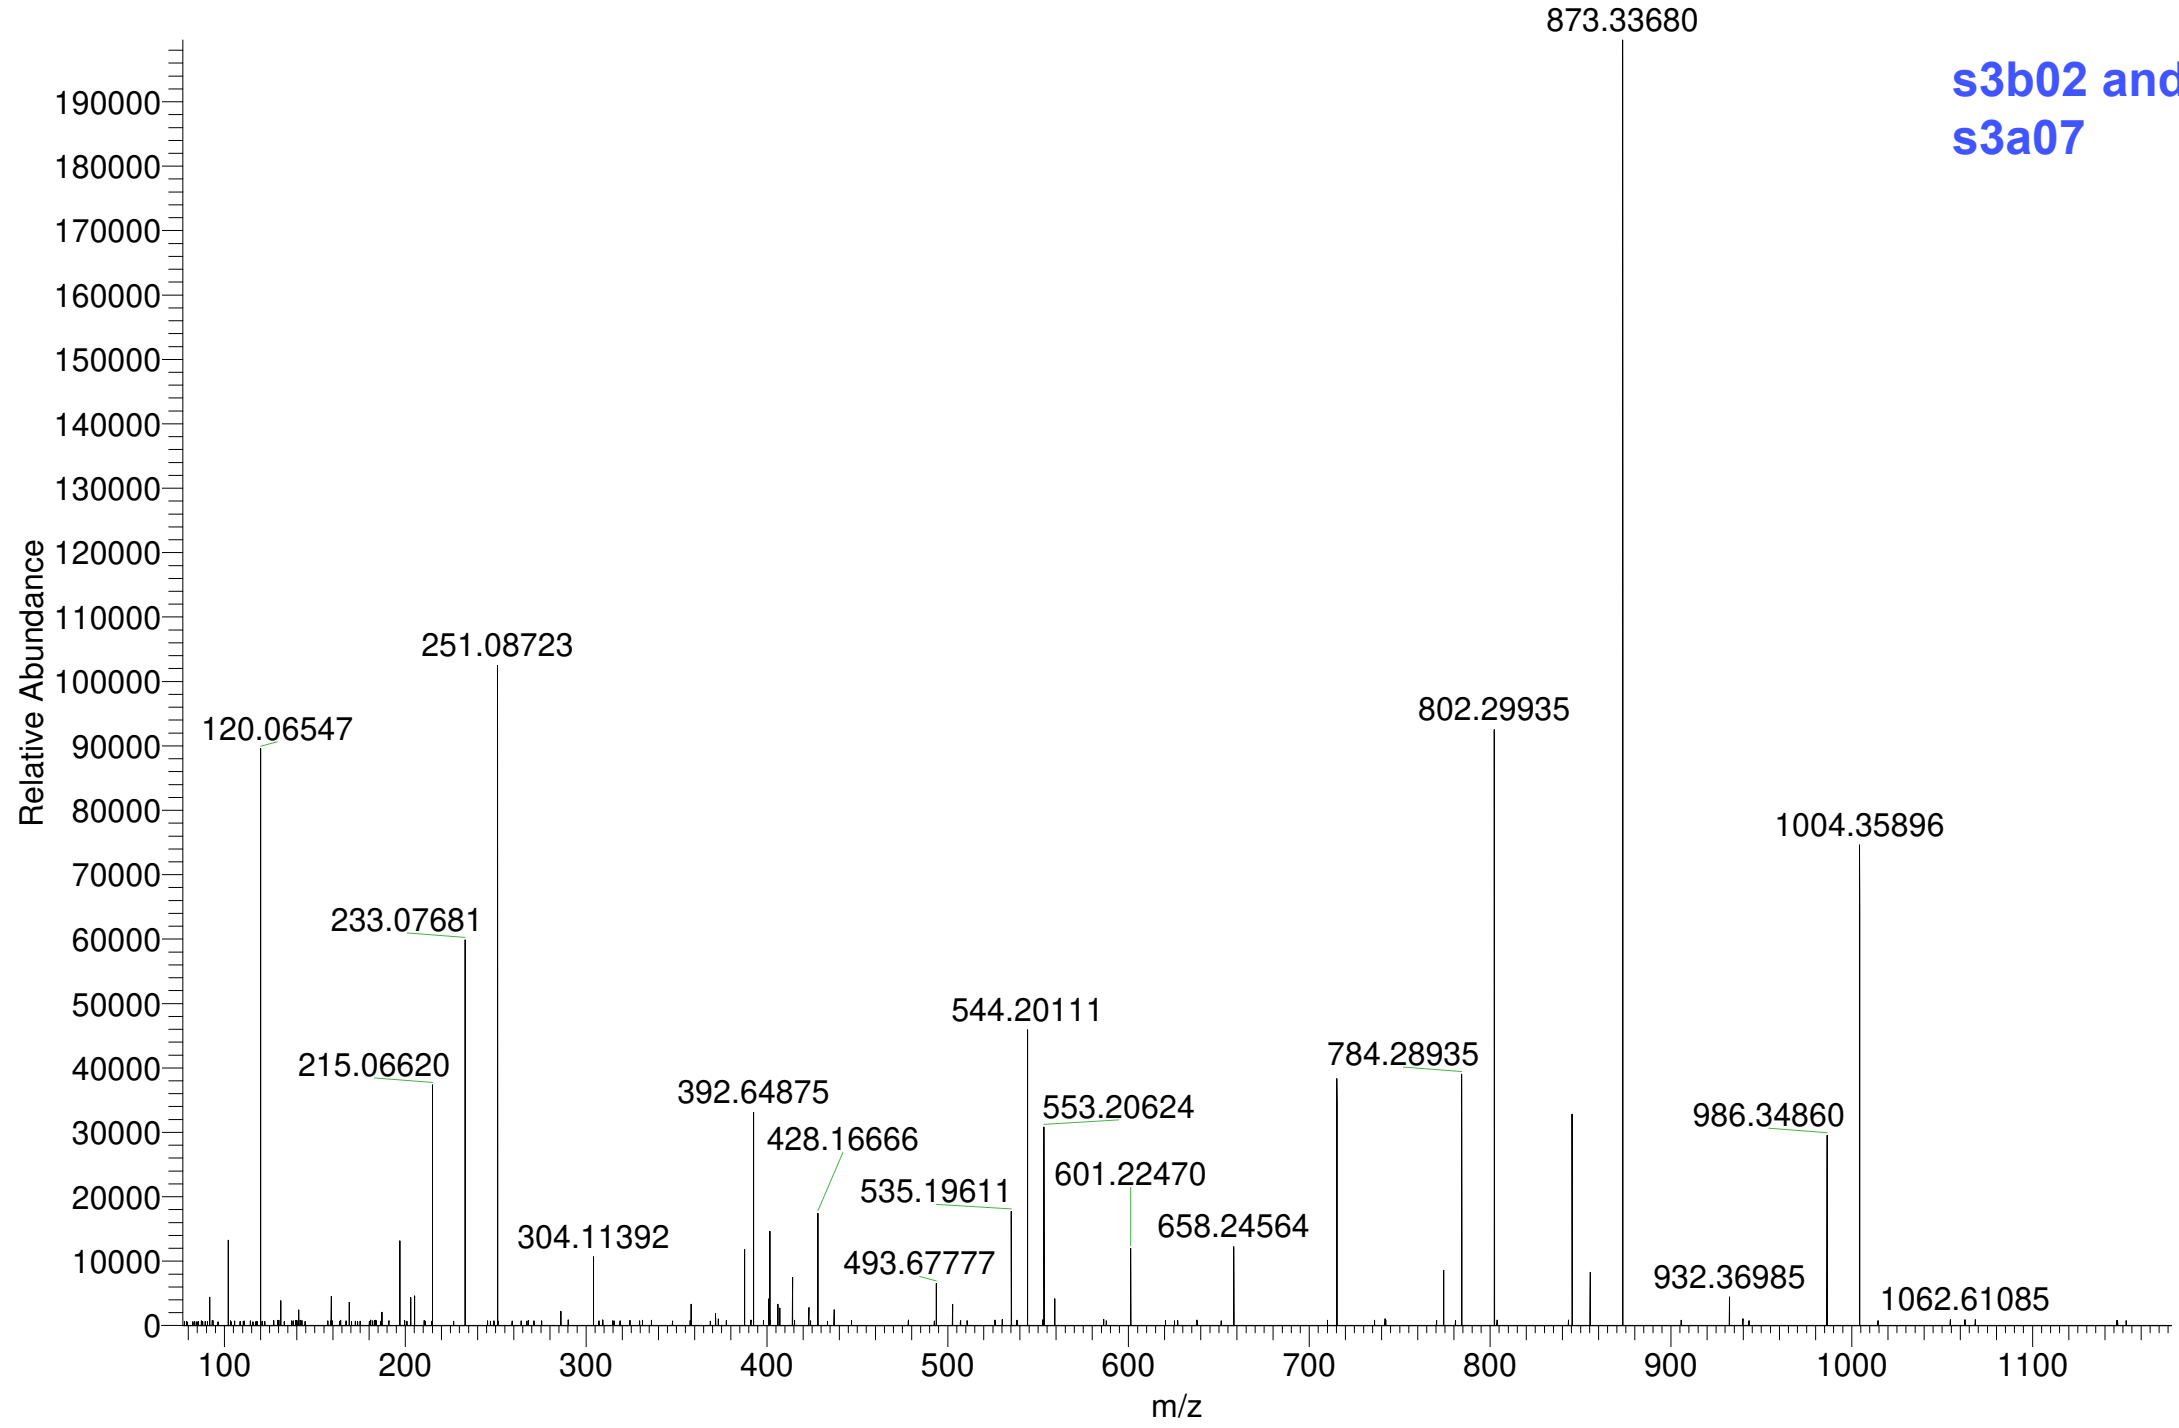

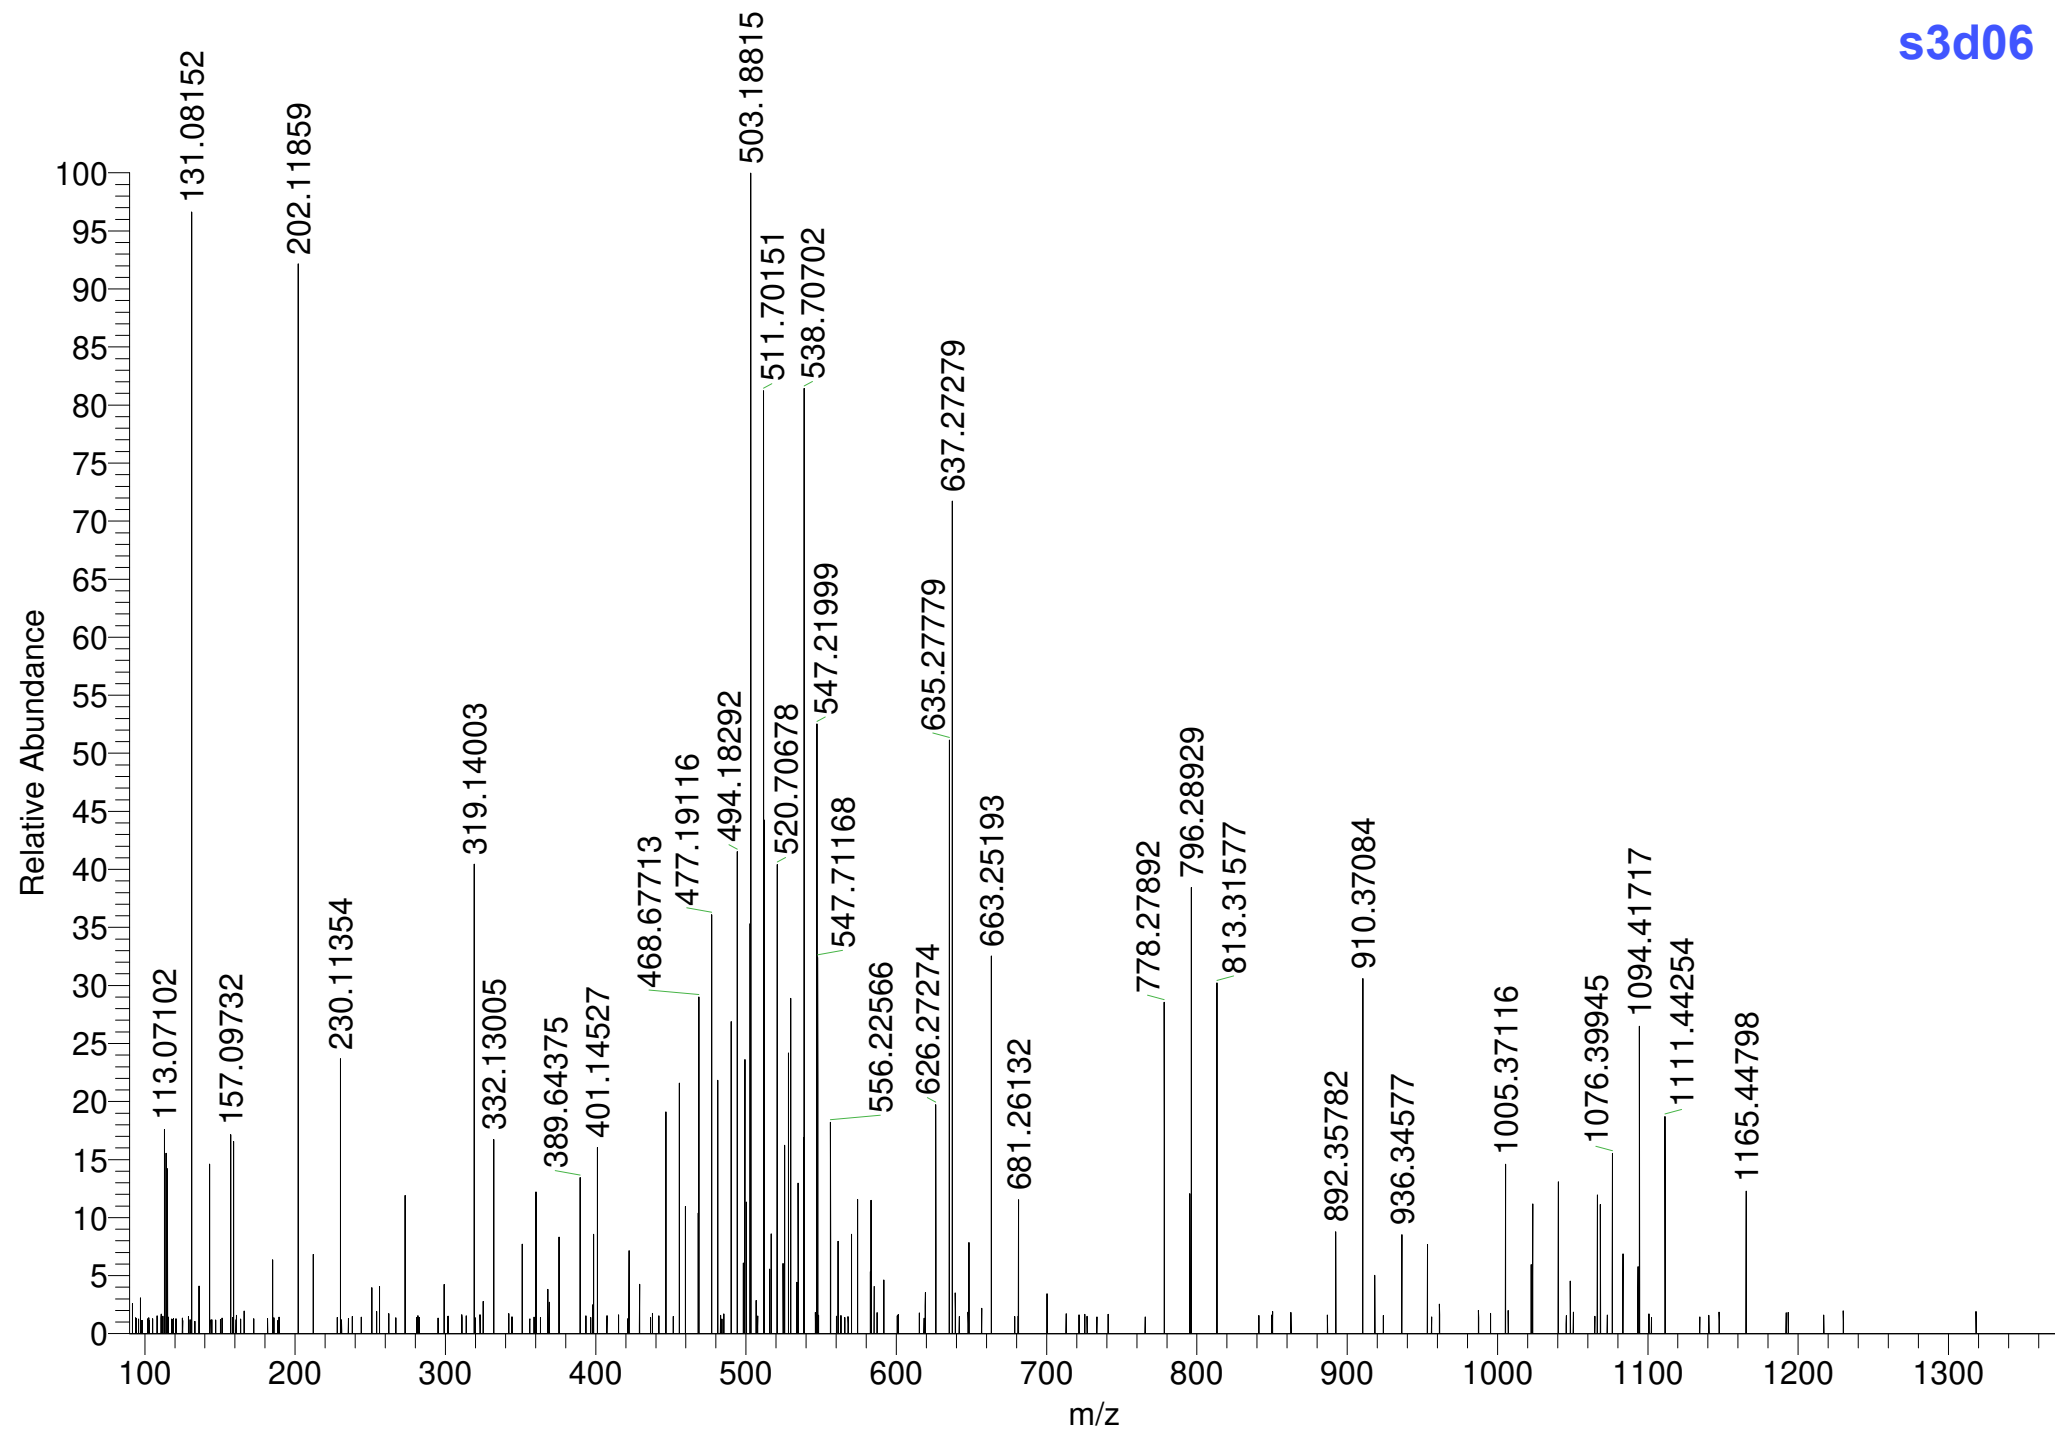

s3e01

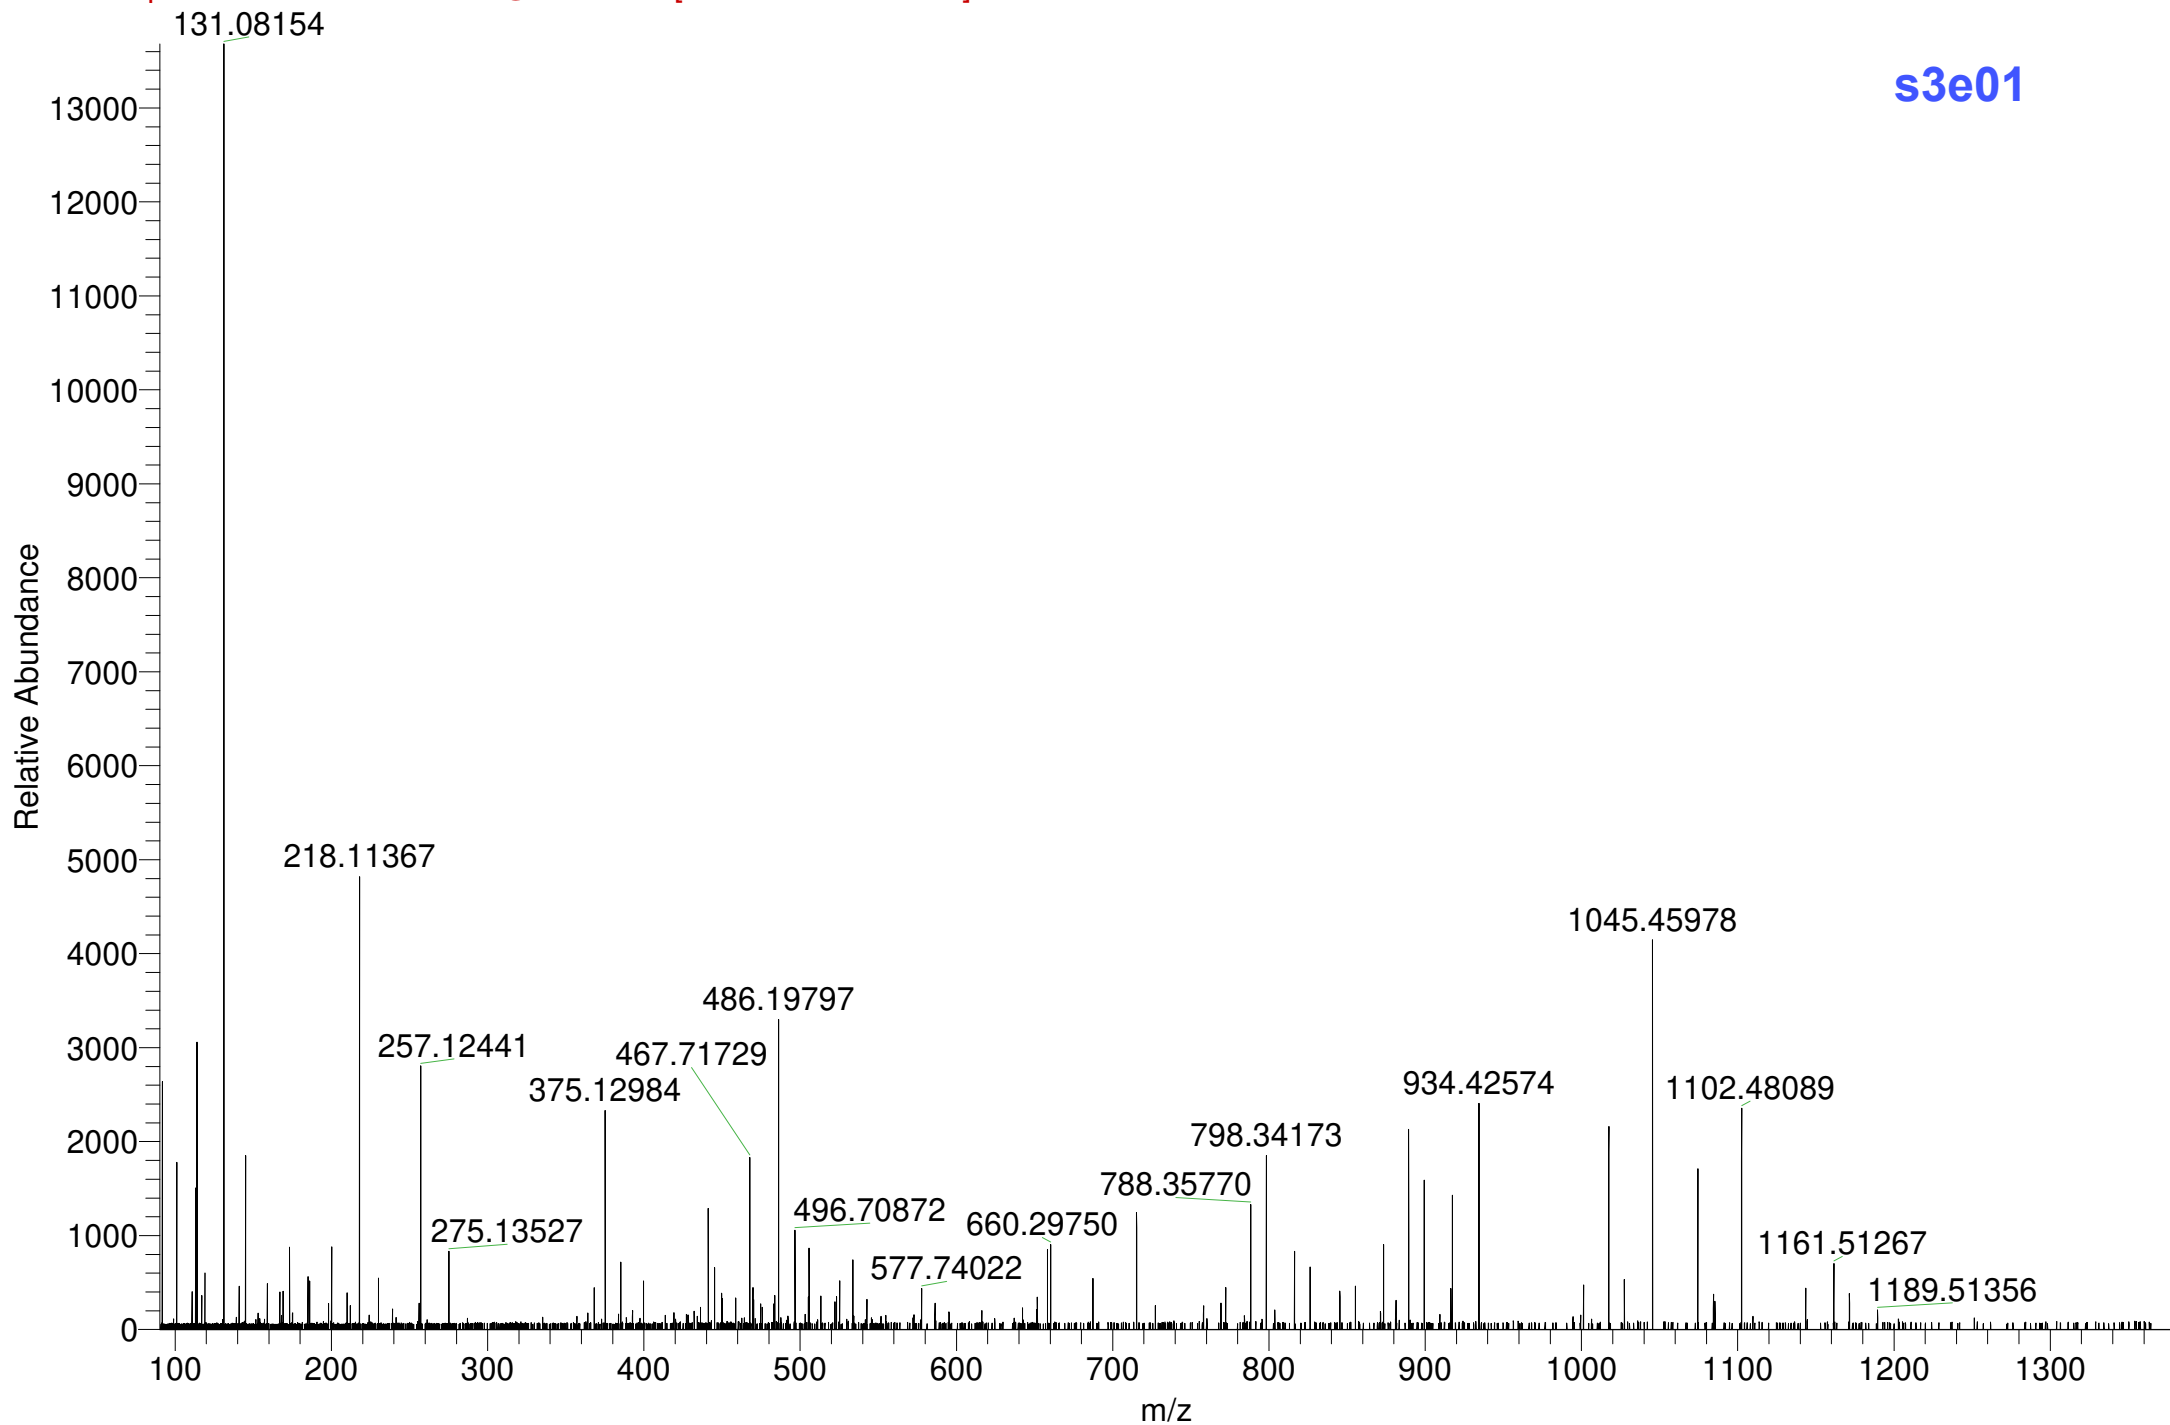

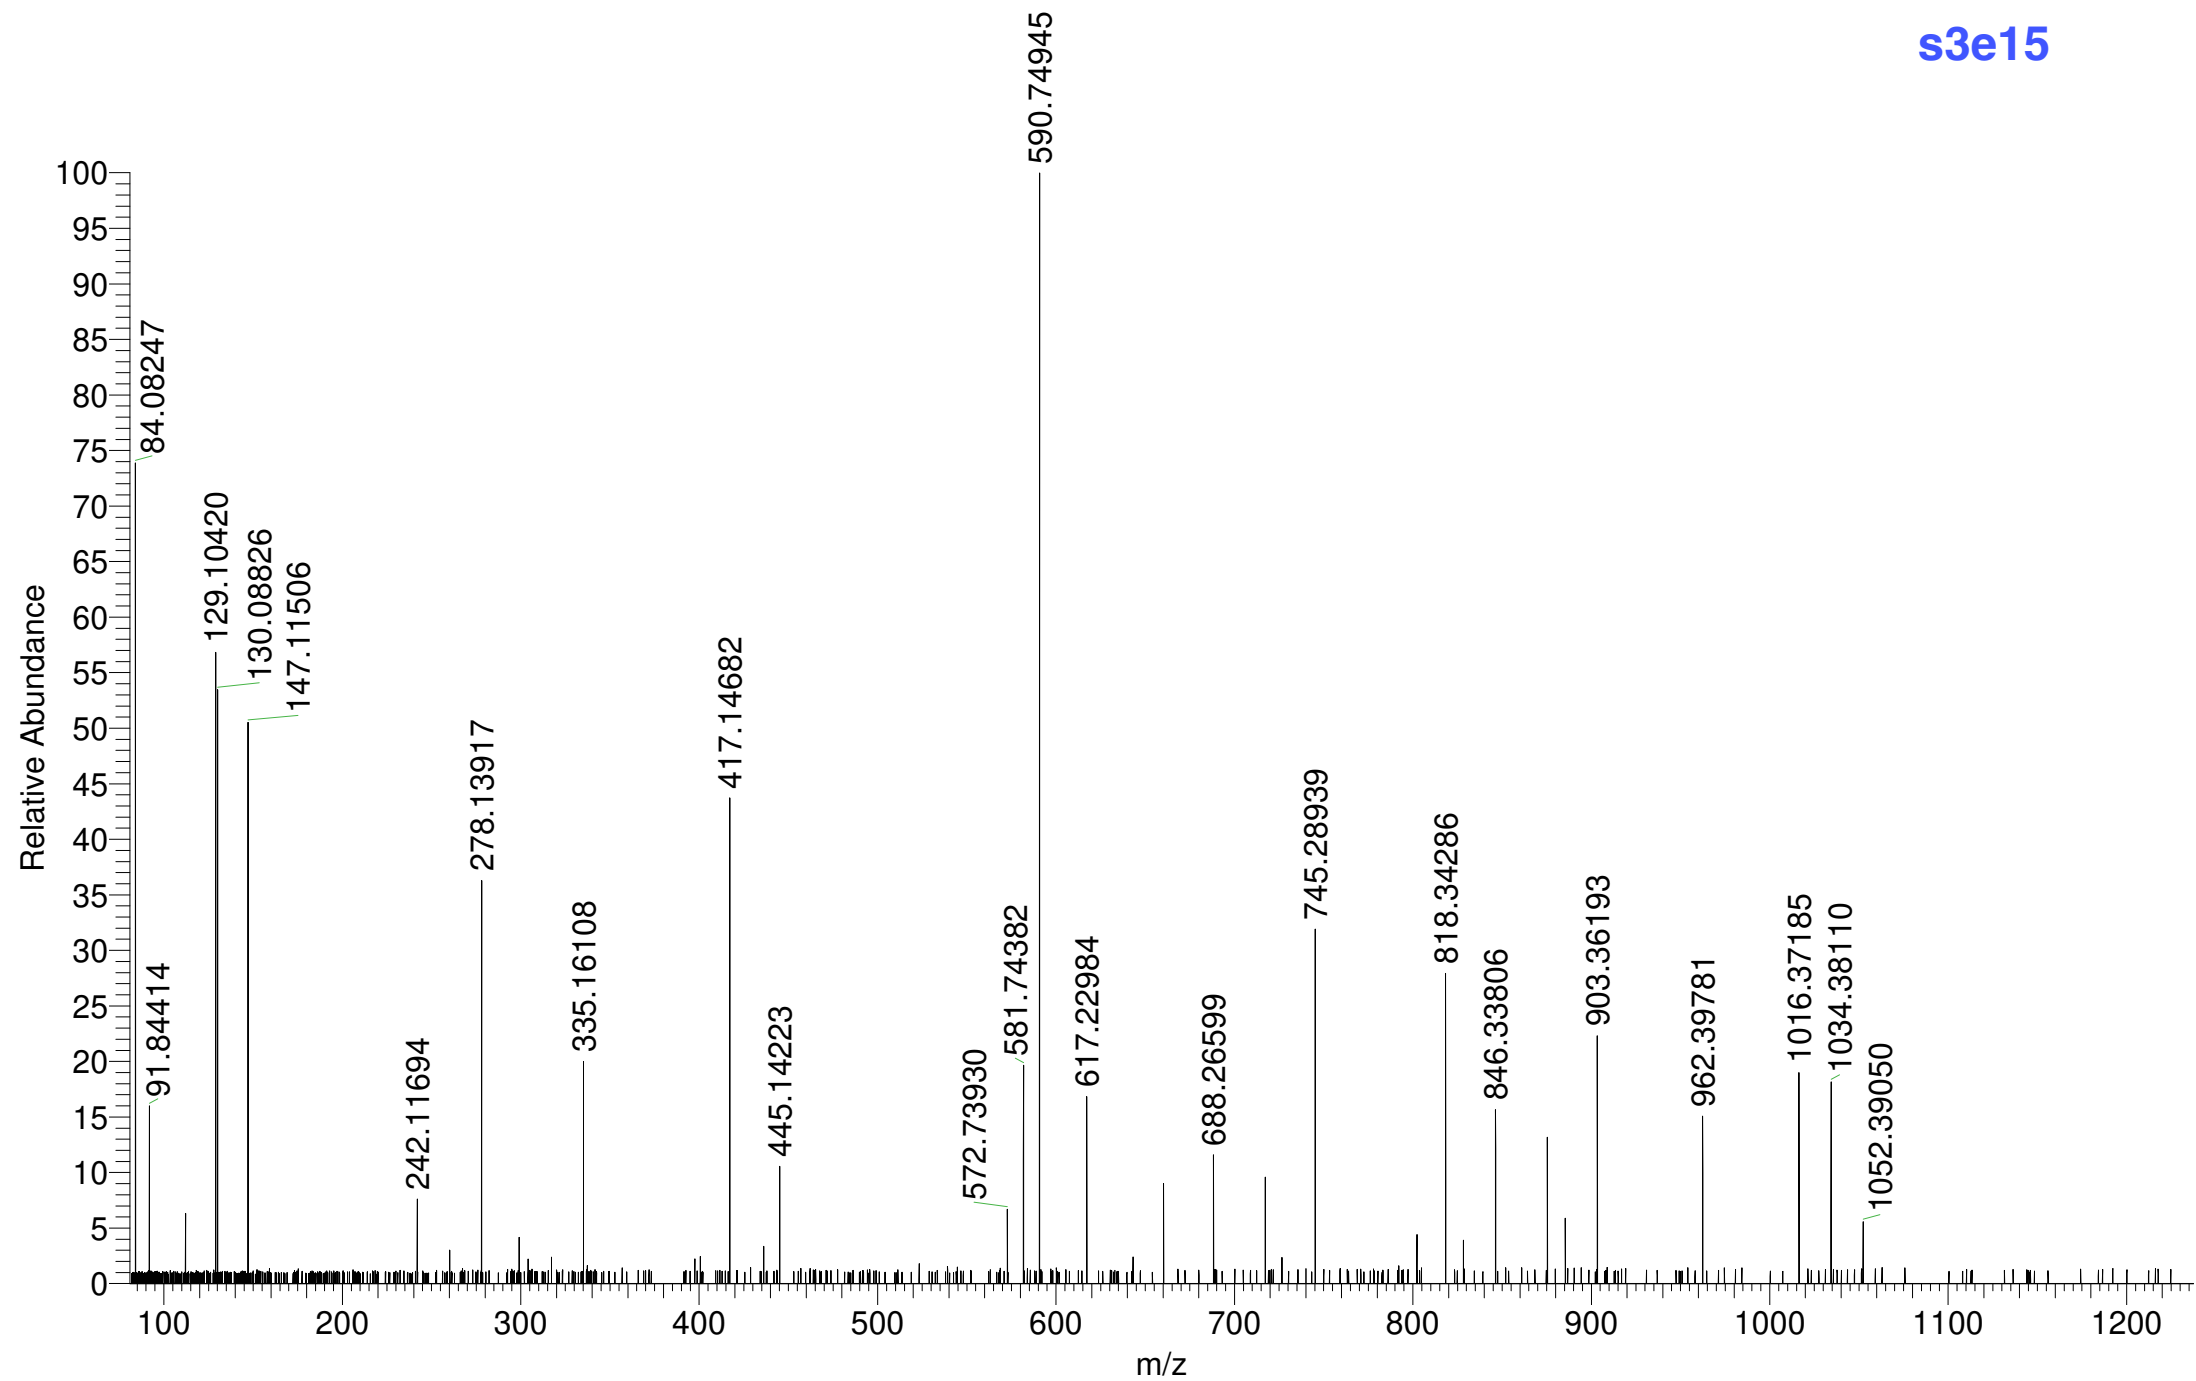

Supplement: supp13 [file elife-96719-supp13-v1.pdf]
