# Supplementary material for: Feature sequence-based genome mining uncovers the hidden diversity of bacterial siderophore pathways
Source: eLife. 2024 Oct 1;13:RP96719. doi: 10.7554/eLife.96719 (PMC11444679; doi:10.7554/eLife.96719)
Supplement: Supplementary file 1. [file elife-96719-supp1.xlsx]

## Sheet: table1
Siderophore name	Siderophore Other name	Microorganisms	Structure	References	Peptide chain sequence
Pyoverdine 10.1	Pyoverdine 2798	Pseudomonas fluorescens		Demange, P., Bateman, A., Mertz, C., Dell, A., Piemont, Y., Abdullah, M. (1990) Biochem. 29,11041-11051	(D-Ser, D-Dab), Gly, Ser, D-OH-Asp, D-Ala, Gly, Ala, Gly, OH-cOrn
Pyoverdine 10.10		Pseudomonas putida		Meyer, J-M., Gruffaz, C., Raharinosy, V., Bezverbnaya, I., Schäfer, M., Budzikiewicz, H. (2008)Biometals. 21, 259-271	Ser, Lys, Ser, Ser, Thr, Thr, Ac-OH-Orn, Ser, Ser, OH-cOrn
Pyoverdine 10.11	Pyoverdine 9.6	Pseudomonas putida		Meyer, J-M., Gruffaz, C., Raharinosy, V., Bezverbnaya, I., Schäfer, M., Budzikiewicz, H. (2008)Biometals. 21, 259-271	Ala, Lys, Dab, OH-Asp, (Thr, Gly, OH-Asp, Gly, Thr, Thr)
Pyoverdine 10.2		Pseudomonas fluorescens		Georgias, H., Taraz, K., Budzikiewicz, H., Geoffroy, V., Meyer, J-M. (1999) Z. Naturforsch. 54c, 301-308	D-Ala, D-Lys, Gly, Gly, OH-Asp, (D-Gln, Dab), Gly, Ser, OH-cOrn
Pyoverdine 10.3	Pyoverdine 17400	Pseudomonas fluorescens		Demange, P., Bateman, A., Mertz, C., Dell, A., Piemont, Y., Abdullah, M. (1990) Biochem. 29,11041-11051	D-Ala, D-Lys, Gly, Gly, OH-Asp, (D-Gln, Dab), Ser, D-Ala, OH-cOrn
Pyoverdine 10.4		Pseudomonas fluorescens		Meyer, J-M., Gruffaz, C., Raharinosy, V., Bezverbnaya, I., Schäfer, M., Budzikiewicz, H. (2008)Biometals. 21, 259-271	Ser, Lys, Gly, Fo-OH-Orn, Ser, Ser, Gly, (Orn, Fo-OH-Orn, Ser)
Pyoverdine 10.5	Pyoverdine 18-1	Pseudomonas fluorescens		Amann, C., Taraz, K., Budzikiewicz, H., Meyer, J-M. (2000) Z. Naturforsch. 55c, 671-680	D-Ser, Lys, Gly, Fo-OH-Orn, Ser, D-Ser, Gly, (Lys, D-Fo-OH-Orn, Ser)
Pyoverdine 10.6	Pyoverdine 1, 2	Pseudomonas fluorescens		Gwose, J., Taraz, K., (1992) Z. Naturforsch. 47c, 487-502	Ser, Thr, D-Ser, Orn, OH-Asp, (D-Gln, Dab), Ser, D-aThr, OH-cOrn
Pyoverdine 10.7	Isopyoverdine 90-44	Pseudomonas putida		Sultana, R., Siddiqui, B. S., Taraz, K., Budzikiewicz, H., Meyer, J-M. (2001) Z. Naturforsch. 56c, 303-307	Asp, Lys, D-Ac-OH-Orn, Thr, D-Ser, D-Ser, Gly, D-Ser, D-Ser, D-OH-cOrn
Pyoverdine 10.8		Pseudomonas rhodesiae		Budzikiewicz, H. (2004) Prog. Chem. Org. Nat. Prod. 87, 81-237	Ser, Lys, Fo-OH-Orn, Ser, Ser, Gly, (Lys, Fo-OH-Orn, Ser, Ser)
Pyoverdine 10.9	Pyoverdine 2192	Pseudomonas tolaasii		Demange, P., Bateman, A., Mertz, C., Dell, A., Piemont, Y., Abdullah, M. (1990) Biochem. 29,11041-11051	D-Ser, Lys, Ser, D-Ser, Thr, D-Ser, Ac-OH-Orn, Thr, D-Ser, OH-cOrn
Pyoverdine 11.1	Pyoverdine 51W	Pseudomonas fluorescens		Voss, J., Taraz, K., Budzikiewicz, H. (1999) Z. Naturforsch. 54c, 156-162	D-Ala, D-Lys, Gly, Gly, D-OH-Asp, D-Gln, D-Ser, Ala, Gly, D-aThr, OH-cOrn
Pyoverdine 11.2	Pyoverdine 12	Pseudomonas fluorescens		Geisen, K., Taraz, K., Budzikiewicz, H. (1992) Monatsh. Chem. 123, 151-178	D-Ser, Lys, Gly, Fo-OH-Orn, D-Ser, Ser, Gly, (Lys, D-Fo-OH-Orn, Glu, Ser)
Pyoverdine 12.1	Pyoverdine GM	Pseudomonas fluorescens		Mohn, G., Taraz, K., Budzikiewicz, H. (1990) Z. Naturforsch. 45b, 1437-1450	D-Ala, D-Lys, Gly, Gly, D-OH-Asp, D-Gln, D-Ser, Ala, D-Ala, D-Ala, Ala, OH-cOrn
Pyoverdine 12.2	Pyoverdine 1547	Pseudomonas fluorescens		Ruangviriyachai, C., Barelmann, I., Fuchs, R., Budzikiewicz, H. (2000) Z. Naturforsch. 55c,323-327	D-Ser, Lys, D-Ala, Ac-OH-Orn, Thr, D-Ala, Gly, D-Gln, D-Ala, Ser, Ser, OH-cOrn
Pyoverdine 1448a		Pseudomonas syringae 1448a		Owen J G, Ackerley D F. Characterization of pyoverdine and achromobactin in Pseudomonas syringae pv. phaseolicola 1448a[J]. BMC microbiology, 2011, 11(1): 1-16.	Lys, D-OH-Asp, Thr, Thr, Ser, D-OH-Asp, Ser
Pyoverdine 3A06		Pseudomonas environmental isolate 3A06		Rehm K, Vollenweider V, Kümmerli R, et al. A comprehensive method to elucidate pyoverdines produced by fluorescent Pseudomonas spp. by UHPLC-HR-MS/MS[J]. Analytical and bioanalytical chemistry, 2022, 414(8): 2671-2685.	Asp, εLys, OH-Asp, Ser, Thr, Ser, Lys, OH-cOrn
Pyoverdine 3B19		Pseudomonas environmental isolate 3B19		Rehm K, Vollenweider V, Kümmerli R, et al. A comprehensive method to elucidate pyoverdines produced by fluorescent Pseudomonas spp. by UHPLC-HR-MS/MS[J]. Analytical and bioanalytical chemistry, 2022, 414(8): 2671-2685.	Asp, Fo-OH-Orn, Lys, (Thr, Ala, Ala, Lys, Fo-OH-Orn, Lys)
Pyoverdine 3D19		Pseudomonas environmental isolate 3D19		Rehm K, Vollenweider V, Kümmerli R, et al. A comprehensive method to elucidate pyoverdines produced by fluorescent Pseudomonas spp. by UHPLC-HR-MS/MS[J]. Analytical and bioanalytical chemistry, 2022, 414(8): 2671-2685.	Ala, Ac-OH-Orn, Gly, Gly, Ser, Ala, OH-Asp, Thr
Pyoverdine 6.1	Pseudobactin; Pseudobactin A	Pseudomonas sp.		Teintze, M., Houssain, M. B., Barnes, C. L., Leong, J., van der Helm, D. (1981) Biochem. 20,6446-6457	εLys, D-OH-Asp, Ala, D-aThr, Ala, D-OH-cOrn
Pyoverdine 6.2		Pseudomonas putida		Meyer, J-M., Gruffaz, C., Raharinosy, V., Bezverbnaya, I., Schäfer, M., Budzikiewicz, H. (2008)Biometals. 21, 259-271	Lys, OH-Asp, Ser, Ser, Ser, OH-cOrn
Pyoverdine 6.3	Pyoverdine Thai	Pseudomonas putida		Ruangviriyachai, C., Uria-Fernandez, D., Schäfer, M., Budzikiewicz, H. (2004) Spectroscopy.18, 453-458	(Ser, Dab), Thr, Ser, Ac-OH-Orn, OH-cOrn
Pyoverdine 6.4	Pyoverdine 9AW	Pseudomonas fluorescens		Budzikiewicz, H., Kilz, S., Taraz, K., Meyer, J-M. (1997) Z. Naturforsch. 52c, 721-728	D-Ser, εLys, OH-His, D-aThr, Ser, OH-cOrn
Pyoverdine 6.5		Pseudomonas aeruginosa		Ruangviriyachai, C., Fernandez, D. U., Fuchs, R., Meyer, J-M. (2001) Z. Naturforsch. 56c, 933-938	(D-Ser, Dab), D-Fo-OH-Orn, D-Gln, D-Fo-OH-Orn, Gly
Pyoverdine 6.7	Isopyoverdine BTP1	Pseudomonas putida		Jacques, P., Ongena, M., Gwose, I., Seinsche, D., Schroder, H., Delfosse, P., Thonard, P., Taraz,K., Budzikiewicz, H. (1995) Z. Naturforsch. 50c, 622-629	Asp, Ala, Asp, D-Ac-OH-Orn, Ser, OH-cOrn
Pyoverdine 6.8		Pseudomonas sp.		Budzikiewicz, H., Schäfer, M., Fernandez, D. U., Meyer, J-M. (2006) Z. Naturforsch. 61c,815-820	D-Ala, Orn, OH-Asp, Dab, Ac-OH-Orn, Lys
Pyoverdine 6.9	Pyoverdine 7.1	Pseudomonas fluorescens		Budzikiewicz, H., Schroder, H., Taraz, K. (1992) Z. Naturforsch. 47c, 26-32	D-Ser, D-Ac-OH-Orn, Ala, Gly, D-aThr, Ala, OH-cOrn
Pyoverdine 7.10		Pseudomonas sp.		Meyer, J-M., Gruffaz, C., Raharinosy, V., Bezverbnaya, I., Schäfer, M., Budzikiewicz, H. (2008)Biometals. 21, 259-271	Ser, Lys, OH-Asp, Ser, Orn, Ser, OH-cOrn
Pyoverdine 7.11	Pyoverdine 19310	Pseudomonas syringae		Jülich, M., Taraz, K., Budzikiewicz, H., Geoffroy, V., Meyer, J-M., Gardan, L. (2001) Z.Naturforsch. 56c, 687-694	εLys, D-OH-Asp, Thr, (Thr, Ser, D-OH-Asp, Ser)
Pyoverdine 7.12	Pyoverdine 13525	Pseudomonas fluorescens		Hohineicher, U., Hartmann, R., Taraz, K., Budzikiewicz, H. (1995) Z. Naturforsch. 50c,337-344	D-Ser, Lys, Gly, Fo-OH-Orn, (Lys, D-Fo-OH-Orn, Ser)
Pyoverdine 7.13	Isopyoverdine 90-33	Pseudomonas putida		Sultana, R., Siddiqui, B. S., Taraz, K., Budzikiewicz, H., Meyer, J-M. (2001) Tetrahedron 57, 1019-1023	Asp, Lys, Thr, D-OH-Asp, Thr, D-aThr, OH-cOrn
Pyoverdine 7.14	Pyoverdine R	Pseudomonas aeruginosa		Gipp, S., Hahn, J., Taraz, K., Budzikiewicz, H. (1991) Z. Naturforsch. 46c, 534-541	(D-Ser, Dab), Fo-OH-Orn, Gln, D-Gln, D-Fo-OH-Orn, Gly
Pyoverdine 7.15		Pseudomonas fluorescens		Uria-Fernandez, D., Fuchs, R., Schäfer, M., Budzikiewicz, H. (2003) Z. Naturforsch. 58c, 1-10	D-Ser, Ala, Ac-OH-Orn, (Orn, D-Asp, Ac-OH-Orn, Ser)
Pyoverdine 7.16	Pyoverdine 96-312	Pseudomonas sp.		Schlegel, K., Fuchs, R., Schäfer, M., Taraz, K., Budzikiewicz, H. (2001) Z. Naturforsch. 56c,680-686	D-Ser, Ser, Fo-OH-Orn, (Lys, Fo-OH-Orn, Lys, Ser)
Pyoverdine 7.17		Pseudomonas sp.		Schäfer, M., Fuchs, R., Budzikiewicz, H., Springer, A., Meyer, J-M., Linscheid, M. (2006) J. Mass. Spectrom. 41, 1162-1170	D-Ser, Orn, Fo-OH-Orn, (Lys, D-Fo-OH-Orn, Glu, Ser)
Pyoverdine 7.18		Pseudomonas sp.		Weber, M., Taraz, K., Budzikiewicz, H., Geoffroy, V., Meyer, J-M. (2000) Biometals. 13, 301-309	D-Ser, Lys, Fo-OH-Orn, (Lys, D-Fo-OH-Orn, D-Glu, D-Ser)
Pyoverdine 7.19		Pseudomonas sp.		Uria-Fernandez, D., Geoffroy, V., Schäfer, M., Meyer, J-M., Budzikiewicz, H. (2003) Monatsh.Chem. 134, 1421-1431	Asp, Arg, Ac-OH-Orn, Lys, Ser, Asp, OH-cOrn
Pyoverdine 7.2	Pyoverdine BTP2	Pseudomonas fluorescens		Ongena, M., Jacques, P., Thonart, P., Gwose, I., Fernandez, D. U., Schäfer, M., Budzikiewicz,H. (2001) Tetrahedron Letts. 42, 5849-5851	D-Ser, Val, OH-Asp, Gly, Thr, D-Ser, OH-cOrn
Pyoverdine 7.20	Pyoverdine 6.6	Pseudomonas fluorescens		Barelmann, I., Taraz, K., Budzikiewicz, H., Geoffroy, V. A., Meyer, J-M. (2002) Z. Naturforsch57c, 9-16	D-Ser, D-Ac-OH-Orn, Ala, Gly, D-aThr, Ala, OH-cOrn
Pyoverdine 7.3	Pyoverdine G + R; Pyoverdine G4R	Pseudomonas putida		Salah-el-Din, A. L. M., Kyslic, P., Stephan, D., Abdallah, M. A. (1997) Tetrahedron 53, 12539-12552	Asp, Orn, (D-OH-Asp, Dab), Gly, Ser, OH-cOrn
Pyoverdine 7.4	Pyoverdine PVD	Pseudomonas sp.		Vossen, W., Taraz, K. (1999) Biometals. 12, 323-329	D-Ser, Orn, OH-Asp, Ser, Ser, D-Ser, OH-cOrn
Pyoverdine 7.5	Pyoverdine TII	Pseudomonas aeruginosa		Tappe, R., Taraz, K., Budzikiewicz, H., Meyer, J-M., Lefevre, J. F. (1993) J. Prakt. Chem. 335,83-87	D-Ser, D-Fo-OH-Orn, Orn, Gly, D-aThr, Ser, OH-cOrn
Pyoverdine 7.6		Pseudomonas libanensis		Meyer, J-M., Gruffaz, C., Raharinosy, V., Bezverbnaya, I., Schäfer, M., Budzikiewicz, H. (2008)Biometals. 21, 259-271	Ala, Orn, OH-Asp, Ser, Orn, Ser, OH-cOrn
Pyoverdine 7.7		Pseudomonas cichorii		Bultreys, A., Gheyse, I., Wathelet, B., Schafer, M., Budzikiewicz, H. (2004) Z. Naturforsch.59c, 613-618	εLys, D-OH-Asp, Thr, (Thr, Gly, D-OH-Asp, Ser)
Pyoverdine 7.8	Pyoverdine PL8	Pseudomonas fluorescens		Barelmann, I., Taraz, K., Budzikiewicz, H., Geoffroy, V. A., Meyer, J-M. (2002) Z. Naturforsch57c, 9-16	Lys, D-Ac-OH-Orn, Ala, Gly, D-aThr, Ser, OH-cOrn
Pyoverdine 7.9	Pyoverdine 11370	Pseudomonas putida		Budzikiewicz, H., Fernandez, D. U., Fuchs, R., Michalke, R., Taraz, K., Ruangviriyachai, C.(1999) Z. Naturforsch. 54c, 1021-1026	Asp, εLys, D-OH-Asp, D-Ser, Ala, D-Ser, OH-cOrn
Pyoverdine 8.1	Pyoverdine A214	Pseudomonas putida		Uria-Fernandez, D., Geoffroy, V., Schäfer, M., Meyer, J-M., Budzikiewicz, H. (2003) Monatsh.Chem. 134, 1421-1431	D-Ser, D-Ac-OH-Orn, Ala, Gly, (D-Ser, Ala, OH-Asp, Thr)
Pyoverdine 8.2	Pyoverdine P19	Pseudomonas fluorescens		Uria-Fernandez, D., Fuchs, R., Schäfer, M., Budzikiewicz, H. (2003) Z. Naturforsch. 58c, 1-10	D-Ser, D-Ac-OH-Orn, Ala, Gly, (D-Ser, Ser, D-OH-Asp, Thr)
Pyoverdine 8.3	Pyoverdine D-TR133	Pseudomonas chlororaphis		Barelmann, I., Fernandez, D. U., Budzikiewicz, H., Meyer, J-M. (2003) Biometals. 16, 263-270	Asp, D-Fo-OH-Orn, Lys, (Thr, D-Ala, D-Ala, D-Fo-OH-Orn, D-Ala)
Pyoverdine 8.4	Pyoverdine 90-51	Pseudomonas putida		Sultana, R., Siddiqui, B. S., Taraz, K., Budzikiewicz, H., Meyer, J-M. (2000) Biometals. 13,147-152	Asp, εLys, D-OH-Asp, Ser, Gly, D-aThr, Lys, OH-cOrn
Pyoverdine 8.5		Pseudomonas sp.		Meyer, J-M., Gruffaz, C., Raharinosy, V., Bezverbnaya, I., Schäfer, M., Budzikiewicz, H. (2008)Biometals. 21, 259-271	Ser, Ser, Fo-OH-Orn, Ser, Ser, (Lys, Ser, Fo-OH-Orn)
Pyoverdine 8.6	Pyoverdine 96-318	Pseudomonas sp.		Schlegel, K., Fuchs, R., Schäfer, M., Taraz, K., Budzikiewicz, H., Geoffroy, V., Meyer, J-M. (2001) Z. Naturforsch. 56c, 680-686	D-Ser, Orn, Fo-OH-Orn, D-Ser, Ser, (Lys, Fo-OH-Orn, Ser)
Pyoverdine 8.7	Pyoverdine I-III	Pseudomonas fluorescens		Budzikiewicz, H. (2004) Prog. Chem. Org. Nat. Prod. 87, 81-237	Asn, D-Fo-OH-Orn, Lys, (Thr, D-Ala, D-Ala, D-Fo-OH-Orn, Lys)
Pyoverdine 8.8	Pyoverdine CHA0; Pyoverdine CHAO	Pseudomonas fluorescens		Wong-Lun-Sang, S., Bernardini, J. J., Hennard, C., Kyslic, P., Dell, A., Abdallah, M. A. (1996)Tetrahedron. Letts. 37, 3329-3332	Asp, D-Fo-OH-Orn, Lys, (Thr, D-Ala, D-Ala, D-Fo-OH-Orn, Lys)
Pyoverdine 8.9	Pyoverdine E	Pseudomonas aeruginosa		Briskot, G., Taraz, K., Budzikiewicz, H. (1989) Liebigs Ann. Chem. 375-384	D-Ser, Arg, D-Ser, Fo-OH-Orn, (Lys, Fo-OH-Orn, Thr, Thr)
Pyoverdine 9.1		Pseudomonas sp.		Meyer, J-M., Gruffaz, C., Raharinosy, V., Bezverbnaya, I., Schäfer, M., Budzikiewicz, H. (2008)Biometals. 21, 259-271	Asp, εLys, OH-Asp, Ser, Ser, Thr, Thr, Thr, OH-cOrn
Pyoverdine 9.10	Pyoverdine 95-275	Pseudomonas fluorescens		Sultana, B., Fuchs, R., Schmickler, H., Schlegel, K., Budzikiewicz, H., Siddiqui, B. S., Geoffroy, V., Meyer, J-M. (2000) Z. Naturforsch. 55c, 857-865	D-Ser, Ser, Fo-OH-Orn, D-Ser, D-Ser, (Lys, Fo-OH-Orn, Lys, Ser)
Pyoverdine 9.11	Pyoverdine C	Pseudomonas putida		Seinsche, D., Taraz, K., Budzikiewicz, H., Gondol, D. (1993) J. Prakt. Chem. 335, 157-168	Asp, OH-But-D-OH-Orn, D-Dab, Thr, Gly, Ser, D-Ser, OH-Asp, Thr
Pyoverdine 9.12		Pseudomonas fluorescens		Meyer, J-M., Gruffaz, C., Raharinosy, V., Bezverbnaya, I., Schäfer, M., Budzikiewicz, H. (2008)Biometals. 21, 259-271	Ala, Ac-OH-Orn, Orn, Ser, Ser, Ser, Arg, OH-Asp, Thr
Pyoverdine 9.2	Pyoverdine Pau	Pseudomonas aureofaciens		Beiderbeck, H., Risse, D., Budzikiewicz, H., Taraz, K. (1999) Z. Naturforsch. 54c, 1-5	D-Ser, D-Ac-OH-Orn, Gly, aThr, D-Thr, Gln, Gly, D-Ser, D-OH-cOrn
Pyoverdine 9.3		Pseudomonas monteilii		Meyer, J-M., Gruffaz, C., Raharinosy, V., Bezverbnaya, I., Schäfer, M., Budzikiewicz, H. (2008)Biometals. 21, 259-271	Asp, Lys, Ac-OH-Orn, Ala, Ser, Ser, Gly, Ser, OH-cOrn
Pyoverdine 9.4		Pseudomonas fluorescens		Meyer, J-M., Gruffaz, C., Raharinosy, V., Bezverbnaya, I., Schäfer, M., Budzikiewicz, H. (2008)Biometals. 21, 259-271	Ser, Lys, Ala, Ser, Ser, Ac-OH-Orn, Ser, Ser, OH-cOrn
Pyoverdine 9.5	Pyoverdine 2392	Pseudomonas fluorescens		Beiderbeck, H., Taraz, K., Meyer, J-M. (1999) Biometals. 12, 331-338	D-Lys, D-Ac-OH-Orn, Gly, D-aThr, Thr, Gln, Gly, D-Ser, D-OH-cOrn
Pyoverdine 9.7	Pseudobactin 589A	Pseudomonas putida		Persmark, M., Frejd, T., Mattiasson, B. (1990) Biochem. 29, 7348-7356	Asp, εLys, D-OH-Asp, Ser, Thr, D-Ala, D-Glu, Ser, OH-cOrn
Pyoverdine 9.8	Pyoverdine 2461	Pseudomonas putida		Budzikiewicz, H. (2004) Prog. Chem. Org. Nat. Prod. 87, 81-237	Asp, εLys, D-OH-Asp, Ser, D-aThr, Ala, Thr, D-Lys, OH-cOrn
Pyoverdine 9.9		Pseudomonas putida		Budzikiewicz, H. (2004) Prog. Chem. Org. Nat. Prod. 87, 81-237	Asp, (Ac-OH-Orn, Dab), Thr, D-Ala, Thr, Thr, D-Gln, OH-cOrn
Pyoverdine GB-1		Pseudomonas putida GB-1		Parker D L, Lee S W, Geszvain K, et al. Pyoverdine synthesis by the Mn (II)-oxidizing bacterium Pseudomonas putida GB-1[J]. Frontiers in Microbiology, 2014, 5: 202.	Asp, εLys, D-OH-Asp, Ser, Gly, D-aThr, Lys, OH-cOrn
Pyoverdine IB3		Pseudomonas sp. IB3		Meyer, Jean-Marie, et al. "Siderotyping of fluorescent Pseudomonas: molecular mass determination by mass spectrometry as a powerful pyoverdine siderotyping method." Biometals 21.3 (2008): 259-271.	Ser, Ala, Thr, Lys, Orn, Ac-OH-Orn, Thr, Thr, Ala, Ser, Thr, Ala, Ala, OH-cOrn
Pyoverdine L48		Pseudomonas entomophila L48		Matthijs S, Laus G, Meyer J M, et al. Siderophore-mediated iron acquisition in the entomopathogenic bacterium Pseudomonas entomophila L48 and its close relative Pseudomonas putida KT2440[J]. Biometals, 2009, 22(6): 951-964.	Ala, Asn, Dab, OH-His, Gly, Gly, Ala, Thr, Ser, OH-cOrn
Pyoverdine pf224		Pseudomonas taiwanensis DSM 21245		Chen W J, Kuo T Y, Hsieh F C, et al. Involvement of type VI secretion system in secretion of iron chelator pyoverdine in Pseudomonas taiwanensis[J]. Scientific reports, 2016, 6(1): 1-14.	Ser, Lys, OH-His, Thr, Ser, OH-cOrn
Pyoverdine S3g01		Pseudomonas environmental isolate S3g01		Rehm K, Vollenweider V, Kümmerli R, et al. A comprehensive method to elucidate pyoverdines produced by fluorescent Pseudomonas spp. by UHPLC-HR-MS/MS[J]. Analytical and bioanalytical chemistry, 2022, 414(8): 2671-2685.	Ala, Ac-OH-Orn, Ala, Gly, Ser, Ala, OH-Asp, Thr
Pyoverdine VLB120		Pseudomonas taiwanensis VLB120		Baune M, Qi Y, Scholz K, et al. Structural characterization of pyoverdines produced by Pseudomonas putida KT2440 and Pseudomonas taiwanensis VLB120[J]. Biometals, 2017, 30(4): 589-597.; Scholz K, Tiso T, Blank L M, et al. Mass spectrometric characterization of siderophores produced by Pseudomonas taiwanensis VLB120 assisted by stable isotope labeling of nitrogen source[J]. Biometals, 2018, 31(5):…	Pro, Asp, OH-Asn, Thr, Ac-OH-Orn, Ser, OH-cOrn
Pyoverdine W15Oct28		Pseudomonas putida W15Oct28		Ye L, Ballet S, Hildebrand F, et al. A combinatorial approach to the structure elucidation of a pyoverdine siderophore produced by a Pseudomonas putida isolate and the use of pyoverdine as a taxonomic marker for typing P. putida subspecies[J]. Biometals, 2013, 26(4): 561-575.	Asp, Ala, D-Ac-OH-Orn, Thr, Gly, (Thr, Hse, D-OH-Asp, Ser, Orn, Hse, Ser)
