# Supplementary material for: Feature sequence-based genome mining uncovers the hidden diversity of bacterial siderophore pathways
Source: eLife. 2024 Oct 1;13:RP96719. doi: 10.7554/eLife.96719 (PMC11444679; doi:10.7554/eLife.96719)
Supplement: Supplementary file 2. [file elife-96719-supp2.xlsx]

## Sheet: Sheet1
Species	Strains	Peptide sequences	reference
P. aeruginosa	ATCC 15692	Ser-Arg-Ser-FoOHOrn-c(Lys-FoOHOrn-Thr-Thr)	https://doi.org/10.1002/jlac.198919890164
P. aeruginosa	ATCC 27853_9518	Ser-FoOHOrn-Orn-Gly-aThr-Ser-cOHOrn	https://doi.org/10.1002/prac.19933350113
P. fluorescens	ATCC 13525_6569	Ser-Lys-Gly-FoOHOrn-[Lys-FoOHOrn-Ser]	https://doi.org/10.1515/znc-1995-5-602
P. fluorescens	A506	X-DSer-Lys-Gly-FoOHOrn-[Lys-FoOHOrn-Ser]	https://doi.org/10.2174/0929867321666141011194624
P. fluorescens	CHA0	Asp-FoOHOrn-Lys-c(Thr-Ala-Ala-FoOHOrn-Lys)	https://doi.org/10.2174/0929867321666141011194624
P. fluorescens	Pf0-1	X-Ala-AcOHOrn-Orn-Ser-Ser-Ser-Arg-OHAsp-Thr	https://doi.org/10.2174/0929867321666141011194624
P. protegens	Pf-5_113	X-Asp-DFoOHOrn-Lys-[Thr-Ala-DAla-DFoOHOrn-Lys]	https://doi.org/10.2174/0929867321666141011194624
P. tolaasii	NCPPB2192	Ser-Lys-Ser-Ser-Thr-Ser-AcOHOrn-Thr-Ser-cOHOrn	https://doi.org/10.1021/bi00502a005
P. aeruginosa	PAO1_107	Rsc-Glu-Tyr-Dab-Ser-Arg-Ser-FoOHOrn-[Lys-FoOHOrn-Thr-Thr]	https://doi.org/10.1002/jlac.198919890164
P. sp.	B10_5442	X-εLys-DOHAsp-Ala-DThr-Ala-DcOHOrn	https://doi.org/10.1021/bi00525a025
P. aeruginosa	1_60_II	Ser-FoOHOrn-Orn-Gly-aThr*-Ser-cOHOrn	https://link.springer.com/article/10.1007/s00216-022-03907-w
P. aeruginosa	206_12_III	(Ser-Dab)-FoOHOrn-Gln-Gln-FoOHOrn-Gly	https://link.springer.com/article/10.1007/s00216-022-03907-w
P. aeruginosa	R_IV	(Ser-Dab)-FoOHOrn-DGln-FoOHOrn-Gly	https://doi.org/10.1515/znc-2001-11-1203
