# Supplementary material for: Feature sequence-based genome mining uncovers the hidden diversity of bacterial siderophore pathways
Source: eLife. 2024 Oct 1;13:RP96719. doi: 10.7554/eLife.96719 (PMC11444679; doi:10.7554/eLife.96719)
Supplement: Supplementary file 3. [file elife-96719-supp3.xlsx]

## Sheet: Sheet1
Strain	substrate1	substrate2	sequence
ATCC 15692	Ser	Ser	FEEQVERTPTAPALAFGEERLDYAELNRRANRLAHALIERGVGADRLVGVAMERSIEMVVALMAILKAGGAYVPVDPEYPEERQAYMLEDSGVQLLLSQSHLKLPLAQGVQRIDLDQADAWLENHAENNPGVELNGENLAYVIYTSGSTGKPKGAGNRHSALSNRLCWMQQAYGLGVGDTVLQKTPFSFDVSVWEFFWPLMSGARLVVAAPGDHRDPAKLVELINREGVDTLHFVPSMLQAFLQDEDVASCTSLKRIVCSGEALPADAQQQVFAKLPQAGLYNLYGPTEAAIDVTHWTCVEEGKDAVPIGRPIANLACYILDGNLEPVPVGVLGELYLAGRGLARGYHQRPGLTAERFVASPFVAGERMYRTGDLARYRADGVIEYAGRIDHQVKLR
ATCC 15692	Arg	Arg	FAHQAASAPEAIALVCGDEYLSYAELDMRAERLARGLRARGVAAEALVAIAAERSFDLVVGLLGILKAGAGYLPLDPNYPAERLAYMLRDSGARWLICQETLAERLPCPAEVERLPLETAAWPASADTRPLPEVAGETLAYVIYTSGSTGQPKGVAVSQAALVAHCQAAARTYGVGPGDCQLQFASISFDAAAEQLFVPLLAGARVLLGDAGQWSAQHLADEVERHAVTILDLPPAYLQQQAEELRHAGRRIAVRACILGGEAWDASLLTQQAVQAEAWFNAYGPTEAVITPLAWHCRTQEGGAPAIGRALGARRACILDAALQPCAPGMIGELYIGGQCLARGYLGRPGQTAERFVADPFSGSGERLYRTGDLARYRVDGQVEYLGRADQQIKIR
ATCC 15692	Ser	Ser	FEEQVERTPTAPALAFGEERLDYAELNRRANRLAHALIERGVGADRLVGVAMERSIEMVVALMAILKAGGAYVPVDPEYPEERQAYMLEDSGVQLLLSQSHLKLPLAQGVQRIDLDQADAWLENHAENNPGIELNGENLAYVIYTSGSTGKPKGAGNRHSALSNRLCWMQQAYGLGVGDTVLQKTPFSFDVSVWEFFWPLMSGARLVVAAPGDHRDPAKLVALINREGVDTLHFVPSMLQAFLQDEDVVSCTSLKRIVCSGEALSADAQQQVFAKLPQAGLYNLYGPTEAAIDVTHWSCVEEGKDAVPIGRPIANLGCYILDGDLEPVPVGVLGELYLAGRGLARGYHQRPGLTAERFVASPFVAGERMYRTGDLARYRADGVIEYAGRIDHQVKLR
ATCC 15692	FoOHOrn	OHOrn	AERARMAPDAVAVIFDEEKLTYAELDSRANRLAHALIARGVGPEVRVAIAMQRSAEIMVAFLAVLKAGGAYVPLDIEYPRERLLYMMQDSRAHLLLTHSHLLERLPIPEGLSCLSVDREEEWAGFPAHDPEVALHGDNLAYVIYTSGSTGMPKGVAVSHGPLIAHIVATGERYEMTPEDCELHFMSFAFDGSHEGWMHPLINGARVLIRDDSLWLPERTYAEMHRHGVTVGVFPPVYLQQLAEHAERDGNPPPVRVYCFGGDAVAQASYDLAWRALKPKYLFNGYGPTETVVTPLLWKARAGDACGAAYMPIGTLLGNRSGYILDGQLNLLPVGVAGELYLGGEGVARGYLERPALTAERFVPDPFGAPGSRLYRSGDLTRGRADGVVDYLGRVDHQVK…
ATCC 15692	Lys	Lys	QEQARLRPQAQALALEGQALSYAELNARANRLAHCLIARGVGPDVLVGIAVERSLDMVVGLLAILKAGGAYVPLDPTYPQDRLRHMLEDSAVGLLLSQEHLLPGLPLHEGLEVLSIDRLERDASVSTDDPVVNLRPENLAYVIYTSGSTGKPKGVAISHAALAQFSRIASGYSALTPEDRILQFATLSFDGFVEQLYPALTRGACVVLRGGDLWDTGELYRQIVEQGVTLADLPTAYWNLFLLDALAEPRRSYGALRQIHIGGEAMPLEGPKLWRQAGMGRVRLLNTYGPTEATVVSSVFDCSAENARVGNASPIGQALPGRTLLVLDEHLGLLPVGAVGELYIASRAGLARAYHDRPGLTAERFLPDPFGEPGSRLYRTGDLARRRGDGVIEYMGRAD…
ATCC 15692	FoOHOrn	OHOrn	AERARMAPDAVAVIFDEEKLTYAELDNRANRLAHALIARGVGPEVRVAIAMQRSAEIMVAFLAVLKAGGAYVPLDIEYPRERLLYMMQDSRAHLLLTHSHLLERLPIPEGLSCLSVDREEEWAGFPAHDPEVALHGDNLAYVIYTSGSTGMPKGVAVSHGPLIAHIVATGERYEMTPEDCELHFMSFAFDGSHEGWMHPLINGARVLIRDDSLWLPERTYAEMHRHGVTVGVFPPVYLQQLAEHAERDGNPPPVRVYCFGGDAVAQASYDLAWRALKPKYLFNGYGPTETVVTPLLWKARAGDACGAAYMPIGTLLGNRSGYILDGQLNLLPVGVAGELYLGGEGVARGYLERPALTAERFVPDPFGAPGSRLYRSGDLTRGRADGVVDYLGRVDHQVK…
ATCC 15692	Thr	Thr	FEEQARQRPQAVALILDEQRLSYGELNARANRLAHCLIARGVGADVPVGLALERSLDMLVGLLAILKAGGAYLPLDPAAPEERLAHILDDSGVRLLLTQGHLLERLPRQAGVEVLAIDGLVLDGYAESDPLPTLSADNLAYVIYTSGSTGKPKGTLLTHRNALRLFSATEAWFGFDERDVWTLFHSYAFDFSVWEIFGALLYGGCLVIVPQWVSRSPEDFYRLLCREGVTVLNQTPSAFKQLMAVACSADMATQQPALRYVIFGGEALDLQSLRPWFQRFGDRQPQLVNMYGITETTVHVTYRPVSEADLEGGLVSPIGGTIPDLSWYILDRDLNPVPRGAVGELYIGRAGLARGYLRRPGLSATRFVPNPFPGGAGERLYRTGDLARFQADGNIEYIG…
ATCC 15692	Thr	Thr	FEEQARQRPQAVALILDEQRLSYGELNARANRLAHCLIARGVGADVPVGLALERSLDMLVGLLAILKAGGAYLPLDPAAPEERLAHILDDSGVRLLLTQGHLLERLPRQAGVEVLAIDGLVLDGYAESDPLPTLSADNLAYVIYTSGSTGKPKGTLLTHRNALRLFSATEAWFGFDERDVWTLFHSYAFDFSVWEIFGALLYGGRLVIVPQWVSRSPEDFYRLLCREGVTVLNQTPSAFKQLMAVACSADMATQQPALRYVIFGGEALDLQSLRPWFQRFGDRQPQLVNMYGITETTVHVTYRPVSEADLKGGLVSPIGGTIPDLSWYILDRDLNPVPRGAVGELYIGRAGLARGYLRRPGLSATRFVPNPFPGGAGERLYRTGDLARFQADGNIEYIG…
ATCC 27853	Ser	Ser	FEEQVERTPTAPALAFGEERLDYAELNRRANRLAHALIERGIGADRLVGVAMERSIEMVVALMAILKAGGAYVPVDPEYPEERQAYMLEDSGVELLLSQSHLKLPLAQGVQRIDLDRGAPWFEDYSEANPDIHLDGENLAYVIYTSGSTGKPKGAGNRHSALSNRLCWMQQAYGLGVGDTVLQKTPFSFDVSVWEFFWPLMSGARLVVAAPGDHRDPAKLVKLINREGVDTLHFVPSMLQAFLQDEDVASCTSLKRIVCSGEALPADAQQQVFAKLPQAGLYNLYGPTEAAIDVTHWTCVEEGKDAVPIGRPIANLACYILDGNLEPVPVGVLGELYLAGRGLARGYHQRPGLTAERFVASPFVAGERMYRTGDLARYRADGVIEYAGRIDHQVKLR
ATCC 27853	FoOHOrn	OHOrn	AERARLAPDAPAVLFDDQVLSFAELDSRANRLAHALIARGVGPEVRVAIAMQRSAEIMIAFLAVLKSGGAYVPLDIEYPRERLLYMMQDSRAHLLLTQSHLLDRLPIPDGLSCLCLDREQEWAGFPAHDPEVALHGDNLAYVIYTSGSTGMPKGVAVSHGPLAAHIVATGERYEMTPADCELHFMSFAFDGSHEGWMHPLINGARVLIRDDSLWLPEQTYAQMHRHGVTVAVFPPVYLQQLAEHAERDGNPPAARVYCFGGDAVAQASYDLAWRALRPQYLFNGYGPTETVVTPLLWKARPDDPCGAAYMPIGTLLGNRSGYILDAQLNLLPVGVAGELYLGGEGVARGYLERPALTAERFVPDPFGAPGSRLYRSGDLTRGRADGVVDYLGRVDHQVK…
ATCC 27853	Orn	Orn	FASRAAMEPERVALLFEERQLSYGELNAQANRLAHRLIELGVGPDVLVGIAVERGLEMIVSLLAVLKAGGAYVPLDPEYPQERLGYMIEDSGIALLLSQSHLLQRLPAASGIACLALDQAWDWQDRPASDPQLRAHPQNLAYVMFTSGSTGRPKGVGISRESLSRHTHVSLEFFGIGPDDRVLQFSTFNFDGFVEQLYPPLACGASVVLRGTEIWDSETLYREIVERRITTVDLTTAYWNMLAKDFANQGVRDYGALRQVHAGGEAMPPESLVAWKAAGLEHVRLLNTYGPTEATVTVTTLDCAPYVDGSKAIPATMPIGKVLPGRAIYLLDDAGQPAPVGAVGELVIGAELLARGYFKRPDLTAARFIPDPFDEQGGGRLYRTGDLARYGADGVIEYV…
ATCC 27853	Gly	Gly	FEAQAGLTPDAPALLFGEERLSYAELNALANRLAWRLREEGVGSDVLVGIALERGVPMVVALLAVLKAGGAYVPLDPQYPADRLQYMIDDSGLRLLLSQQSVLARLPQSDGLQSLLLDDLERLVHGYPAENPDLPEAPDSLCYAIYTSGSTGQPKGVMVRHRALTNFVCSIARQPGMLARDRLLSVTTFSFDIFGLELYVPLARGASMLLASREQAQDPEALLDLVERQGVTVLQATPATWRMLCDSERVDLLRGCTLLCGGEALAEDLAARMRGLSASTWNLYGPTETTIWSARFCLGEEARPFLGGPLENTGLYILDSEMNPCPPGVAGELLIGGDGLARGYHRRPGLTAERFLPDPFAADGSRLYRTGDLARYRADGVIEYLGRIDHQVKIR
ATCC 27853	aThr	Thr	ERQAAERPRATAVVYGERALDYGELNLRANRLAHRLIELGVGPDVLVGLAAERSLEMIVGLLAILKAGGAYVPLDPRYPSDRLGYMIEDSGIRLLLTQRAARERLPLGEGLPCLLLDAEHEWAGYPESDPQSAVGVDNLAYVIYTSGSTGKPKGTLLPHGNVLRLFDATRHWFGFSADDAWSLFHSYAFDFSVWEIFGALLHGGRLVIVPYETSRSPEDFLRLLCRERVTVLNQTPSAFKQLMQVACAGQEVPPLALRHVVFGGEALEVQALRPWFERFGDRAPRLVNMYGITETTVHVTYRPLSLADLDGGAASPIGEPIPDLSWYLLDAGLNPVPRGCIGELYVGGAGLARGYLNRPELSCTRFVADPFSTTGGRLYRTGDLARYRCDGVVEYVGRI…
ATCC 27853	Ser	Ser	FEEQVERTPTAPALAFGEERLDYAELNRRANRLAHALIERGIGADRLVGVAMERSIEMVVALMAILKAGGAYVPVDPEYPEERQAYMLEDSGVQLLLSQSHLKLPLAQGVQRIDLDQADAWLENHAENNPGVELNGENLAYVIYTSGSTGKPKGAGNRHSALSNRLCWMQQAYGLGVGDTVLQKTPFSFDVSVWEFFWPLMSGARLVVAAPGDHRDPAKLVALINREGVDTLHFVPSMLQAFLQDEDVASCTSLKRIVCSGEALPADAQQQVFAKLPQAGLYNLYGPTEAAIDVTHWTCVEEGKDAVPIGRPIANLACYILDGNLEPVPVGVLGELYLAGRGLARGYHQRPGLTAERFVASPFVAGERMYRTGDLARYRADGVIEYAGRIDHQVKLR
ATCC 27853	cOHOrn	OHOrn	EWSRRTPDATALVFDERSHSFAELDARANRLAHALVERGVAADVRVGVALPRGTELVVALLAVLKAGGAYVPLDLAYPRERLAYLMQDSGIALLLSESQALVQLPVPAGVPALALDRLDLLEHPAQAPQVEVHPANLAYVIYTSGSTGLPKGVAVSHGPLAMHIDAVGERYEMSPADRELHFMSFAFDGAHERWLTALGHGGSLLLRDDALWTPEQTYAAMQRHGVTVAAFPPVYLQQLAEHAERDGNPPPVRIYCFGGDAVPVAGFELAKRALKPRYIINGYGPTETVVTPLIWKAAMDTECGAAYAPIGSFVGERCGYVLDADLNPLPAGVAGELYLGGVGLARGYLQRPGLSAERFVANPFSRAGERLYRTGDLVRQREDGTFDYLGRIDNQVKVR
ATCC 13525	Ser	Ser	EDQVQRTPHAPALVFGATTLTYAQLDGRANQLAHALRERGVGPDVLVGVCVERSVEMVVGLLAILKAGGAYVPLDPEYPPERLAYMIEDSGITLLLSQHSLLAVLPAAGLQVIALDQAPGWLEGYSLESPTVDSHALNLAYVIYTSGSTGKPKGAGNSHRGLVNRLCWMQQAYGLNASDAVLQKTPFSFDVSVWEFFWPLMTGARLVVAAPGEHREPARLIDTIGRHGITTVHFVPSMLQAFIHEPDVHTCTCLKRIVCSGEALPLDAQVQVFAKLPNAGLFNLYGPTEAAIDVTHWTCVDEGADSVPIGRPIANLATYLLDAELNPVPAGVSGELYLGGTGLARSYHRRAALTSERFVPSPFVNGERLYRSGDRVRQRADGVIEYLGRLDHQVKLR
ATCC 13525	Lys	Lys	AAQAQATPDALAVQAGSERLSYAQLNARANRLAHRLVELGVGPGQRVGLASRRGPQLIVSLLAVLKTGAAYVPLDPTYPAERLAYMLADSRLDLLLSQTGLLTELALPQGLLRVAFSASGEELDGYPATNPANSAAAADLAYVIYTSGSTGQPKGVAIDHAALGQFCDSAEAYSRLCAEDRVLQFATFSFDGFVEQCYPPLCVGAAVIMRGDEPWDVGQLAEEIVEQGVTLADLPAAYWYLLAKECALDRRTLGNLRQVHVGGEAMSVEGVRAWHAAGLGEVRLVNTYGPTEATVVSSVHECQLADASDAFGVPIGQAIAGRSLYVLDSGFELLATDGVGELCIGAEAGLAQRYFDRPALTAERFLPDPFSRVPGARLYRSGDLARYNEAGALEYVGRS…
ATCC 13525	Gly	Gly	FEAQVRAQPDASALQFNGDALSYRELNRRANRLAHRLIAAGVGPDVLVAVHVERSLDMVVGLLATLKAGGAYVPLDPQFPADRLAFMLEDSRAQVLLTQPHLNGRLAQPDGLQVLLVDAVDASGAEHDPQVTITPEHLAYVIYTSGSTGRPKGVMVRHQALCSFACGMAASLEFGSDARVLSLTTFSFDIFALELYVPLSVGGTVLLSGQELALDPEAIIDLVHNQSARVLQATPSTWRMLLESPRAHWLQGIKCLCGGEALPVDLAQGLLDLQGPVWNLYGPTETTIWSAAHRLSAAQPFVGRPIANTSLFILNAGLTPCPQGAAGELMIGGAGLARGYHERPALTAERFVPNPYGAPGERLYRSGDLARYRPDGVVEYIGRVDQQVKVR
ATCC 13525	FoOHOrn	OHOrn	DCARENPNAVAVKFAAQTLTYGELDGQANRLAHALIARGVGPEVRVAIAMPRSAEIMVAFLAVLKAGGVYVPLDVEYPRDRLLYMMQDSRAQLLLTHTCVLQQLPIPEGLNTLAIDRSEDWAEYSDTAPSVALDGDNLAYVIYTSGSTGLPKGVAVSHGPLVAHIIATGERYETGPADCELHFMSFAFDGSHEGWMHPLINGASVLIRDDSLWLPEYTYAQMHRHNVTMAVFPPVYLQQLAEHAERDGNPPAVRVYCFGGDAVAQASYDLAWRALKPTYLFNGYGPTETVVTPLLWKARKGDPCGAVYAPIGTLLGNRSGYVLDAQLNLQPIGVAGELYLGGEGVARGYLERPALTAERFVPDPFGTPGSRVYRSGDLTRGRPDGVVDYLGRVDHQVKIR
ATCC 13525	Lys	Lys	FEAQAQRHPQRQALALNEQAISYGELNRQANRLAHYLIAQGVGPEVLVGIAVERSLAMVVSLLAVLKAGGAYVPLDPQYPRERLVHMLEDSGLQRVLTQSSLRERLPLPEHVVALDIDLADAQLAQCAEHNPGLDFEPRSLAYVIYTSGSTGKPKGVAINHAALSEFASIAAGYSGLTPDDRVLQFATLNFDGFVEQLYPALTVGASVVLRGPQLWDGAELYQQIIAQGITLADLPTAYWKLFLQDCLAAGPRAYGALRQVHIGGEAMPLDGPTLWRRAGLGHVRLLNTYGPTEATVVSSVLDCSDDATVIGASASPIGRALPGRALYVLDRDLNLLPVGAVGELYIASESGLARAYLQRPALTAERFVADPFGRAGERLYRTGDLARCRADGVIEYVG…
ATCC 13525	FoOHOrn	OHOrn	DRARENPNAVAVKFAAQTLTYGELDGQANRLAHALIARGVGPEVRVAIAMPRSAEIMVAFLAVMKSGGVYVPLDVEYPRDRLLYMMQDSRAKLLLTHSAVQQRLPIPQGLAVLAVDQAEAWATVDDTDPQVALDGDNLAYVIYTSGSTGLPKGVAVSHGPLVAHIIATGERYETGPADCELHFMSFAFDGSHEGWMHPLINGASVLIRDDSLWLPEYTYAQMHRHNVTMAVFPPVYLQQLAEHAERDGNPPAVRVYCFGGDAVAQASYDLAWRALKPTYLFNGYGPTETVVTPLLWKARKGDPCGAVYAPIGTLLGNRSGYVLDAQLNLQPIGVAGELYLGGEGVARGYLERAALTAERFVPDPFGTPGSRVYRSGDLTRGRPDGVVDYLGRVDHQVKIR
ATCC 13525	Ser	Ser	EAQVVRTPDATALVFAGQHLSYAELNRRANRLAHRLIAAGVGPDVLVGLAVERSIEMVVGLLAVLKAGGAYVPLDPEYPRDRLTYMVQDSGVRWLLTQAHLLEQLPIPAGIQHLVLETGEAWLEGYSAHNPDSAVDGENLAYVIYTSGSTGQPKGAGNRHSALTNRLCWMQQAYGLEASDSVLQKTPFSFDVSVWEFFWPLMSGARLVVAAPGEHRDPARLVSLINAEQVTTLHFVPSMLQAFLQDEAVSACHSLQRIVCSGEALPVDAQQQVFAKLPGARLYNLYGPTEAAIDVTHWTCVDEGQDAVPIGRPIANLGCYVLNSNLAPAPLGVLGELYLGGIGLARGYHRRPALTAERFVPDPLGSGARLYRTGDLARYRDEGVIEYAGRIDHQVKLR
A506	DSer	Ser	EDQARRSPDAPALVFGTTTLTYAQLDARANQLAHALGEQGVGPDVLVGICIERSIEMVVGLLAILKAGGAYVPLDPEYPQERLAYMIEDSGIQLLLSQQSLLASLPVAGIQVIALDQPALWLDGYSRESPNVALHALNLAYVIYTSGSTGKPKGAGNSHRALVNRLSWMQQAYGLGANDAVLQKTPFSFDVSVWEFFWPLMTGARLVVAAPGEHREPARLIDTIGRHAITTLHFVPSMLQAFIHEPGVQACASLTRIMCSGEALPLDAQQQVFAKLPAAALYNLYGPTEAAIDVTHWTCIDEGADSVPIGRPIANLGTYVLDAQLNPVPAGVSGELYLGGVGLARSYHRRPALTAERFVPSPFVTGERLYRTGDRVRQRADGVIEYLGRLDHQVKLR
A506	Lys	Lys	AAQAEATPDALAVQAGDASLSYAQLNQRANRLAHRLLALGVGPGQRVGLASRRGPQLIVSLLAVLKSGAAYVPLDPEYPAERLAYMLADSRLDVLLSETGLLADLPLPRGLTRMDFSARGDELTGYPTTNPPNHAAAADLAYVIYTSGSTGQPKGVAIDHAALGQFCDSATLYSRLSAEDRVLQFATFSFDGFVEQCFPPLCAGAALIMRGDELWDAGQLAQEIVEQGVTLADLPAAYWYLLAQECAEHRRFLGKLRQVHVGGEAMSVEGVRAWYAAGLGNVRLVNTYGPTEATVVSSVHECQLADANDAYGVPIGQAIAGRGLYVLDSGFELLATDGVGELCIGAEVGLAQRYFDRPALTAERFLPDPFCATPGARLYRSGDLARYNPAGALEYVGRI…
A506	Gly	Gly	FEAQAAAQPDAIALHFNDEHLSYGELNRRANRLAHRLIDRGVGPDVLVAVHVERSLDMVVGLLATLKAGGAYVPLDPQFPAERLGYMLEDSRARVLLTQPHLLGHLAQPHGVQVLMVEEAGTAQHNPQVAVTPEHLAYVIYTSGSTGKPKGVMVRHKALCSFTSAMAGTLSIGQDARLLSLTTFSFDIFALELYVPLSVGGTVLLSAQAMALDPEAILDLAQRQAANVLQATPSTWRMLLDSPRAHSLRGIACLCGGEALPVDLAQRMLDLQGPLWNLYGPTETTIWSAAHRLHQALPFVGRPIANTGLFILNAGLTPCPQGVSGELLIGGVGLARGYHGQPALTAERFVPNPFGAPGERLYRTGDLARYQANGVVEYIGRVDHQVKVR
A506	FoOHOrn	OHOrn	DRARQTPDAVAVKFDAQTLTYGELDRQANRLAHALIARGVGPEVRVAIAMPRSAEIMVAFLAVMKAGGVYVPLDIEYPRDRLLYMMQDSRAQLLLTHSRALQQLPVPEGLDTLAIDRTEEWAGYSDTAPDVALDGDNLAYVIYTSGSTGLPKGVAVAHGPLVAHIIATGERYETSPADCELHFMSFAFDGSHEGWMHPLINGASVLIRDDSLWLPEYTYEQMHRHNVTMAVFPPVYLQQLAEHAERDGNPPAVRVYCFGGDAVAQASYDLAWRALKPKYLFNGYGPTETVVTPLLWKARKGDPCGAVYAPIGTLLGNRSGYVLDAQLNLQPIGVAGELYLGGEGVARGYLERPALTAERFVPDPFGKPGSRVYRSGDLTRGRPDGVVDYLGRVDHQVKIR
A506	Lys	Lys	FEAQADQQPERQALALDEQTLSYGELNRQANRLAHYLLAQGVGPQGLVGIAVERSFAMVVSLLAVLKTGAAYVPLDPEYPRERLAHMLEDSGVGLVLTQSHLHGRLPLPAQVLAVDIDRVQAQLALRADDNLPVEVEPQSLAYVIYTSGSTGKPKGVAISHAALSEFAGIAADYSQLVAQDRVLQFATLNFDGFVEQLYPALTLGATVVLRGPQLWDGAELYRQIIAQGITLADLPTAYWKLFLQDCLAAGPRTYGALRQIHIGGEAMPLDGPLLWQRAGLGHVRLLNTYGPTEATVVSSVLDCTDPSAVSAGGASPIGRALPGRGLYVLDRDLNLLPLGAVGELYIASANGLARAYLQRPGLTAERFVADPFSPSGERLYRTGDLARYRADGVVEYVG…
A506	FoOHOrn	OHOrn	DRARETPDAVAVKFDAQTLTYGELDRQANRLAHALIARGVGPEVRVAIAMPRSAEIMVAFLAVMKAGGVYVPLDIEYPRDRLLYMMQDSRSKMLLTHSAVQHRLPIPDGLDVLAVDQVQAWSDYSDTAPTVALDGDNLAYVIYTSGSTGLPKGVAVSHGPLVAHIIATGERYETSPADCELHFMSFAFDGSHEGWMHPLINGASVLIRDDSLWLPEYTYEQMHRHNVTMAVFPPVYLQQLAEHAERDGNPPAVRVYCFGGDAVAQASYDLAWRALKPKYLFNGYGPTETVVTPLLWKARKGDPCGAVYAPIGTLLGNRSGYVLDAQLNLQPIGVAGELYLGGEGVARGYLERPALTAERFVPDPFGKPGSRVYRSGDLTRGRPDGVVDYLGRVDHQVKIR
A506	ser	Ser	EAQVRRTPNAQALVFGAQTLSYTQLNARANRLAHRLIQAGVAPDVLVGVAMERSIEMVVALLAVLKAGGAYVPLDPDYPRERLAYMLQDSNVPLLLTQAHLLQALPVSAPSHCLVVEPDDHWLSEYADTDPDVAVDAENLAYVIYTSGSTGQPKGAGNRHCALTNRLLWMQQAYTLGAEDTVLQKTPFSFDVSVWEFFCPLMTGARLVVAAPGDHRDPSKLVELINRHQVTTLHFVPSMLHAFLQDSQVASCQGLRRIICSGEALPVGVQQHVFAELPNTGLFNLYGPTEAAIDVTHWTCVDEHRDSVPIGRPISNLRTYVLDAQLQPVAVGVAGELYLGGVGLARSYHRRPSLTAERFVPCPFQPGTRLYRTGDRVRQRRDGVIEYIGRLDHQVKLR
CHA0	Asp	Asp	FARQVAAQPEAPALVFAGQCLSYRELDLRASRLAAALVARGVGPEVPVGIAVERSLEMVLGLLAVLKAGGAYVPLDPQYPEQRLSYMLEDSGVRLLLSETAVQPRLPVAAWVEVLLLDQAQAWAPDSDPLAALPGMAAGNLAYSIYTSGSTGAAKGVSITHGALANYVQAIIQRLPLGAARTMAVVSTIAADLGHTTLFGALCSGSCLHVIDLDTGLDADAFGAYLHTHQIDVLKIVPSHLQALMSGEEPARSLPRQCLVLGGEACPAALVRRIATLAPECAVFNHYGPTETTVGALTMAAATLADERAVVPLGLPLANVRARVLDASLQPVAPGTPAELYLGGAGLARGYHQRAALTAERFVPDPFSGDGQRLYRTGDLARYLDGGVIDYLGRIDHQV…
CHA0	FoOHOrn	OHOrn	FADQAAKAPDAPAVFFAEQRLSYRELDTQANQLAHKLIELGVGPEVRVAIAMPRCAEIMVAFLAVLKAGGVYVPLDIEYPQDRLRYMMQDSGAWLLLTQSHLLDRLPIPDGLPTLSVERAADFAGYPASAPQVDLAEENLAYVIYTSGSTGLPKGVAVSHGPLAMHSLATGERYEMSPADCELHFMSFAFDGSHEGWMHPLIYGASVLIRDDSLWSPEFTYEQMHRYGVTVGVFPPVYLQQLAVHAERDGNPPAVRVYCFGGDAVPQASYDLAWRVLRPKYIFNGYGPTETVVTPLIWKAKAGDPCDAAYAPIGNIVGNRSAYVADANLNLLPVGVAGELYLGGLGVARGYLDRPGLTAERFIPDPYSTTGARLYRSGDLTRYRTDGLVEYVGRVDHQV…
CHA0	Lys	Lys	EAQAARTADAVALLCAGQQLSYGQFNQRANQLAHKLIEQGVGPDVRVGIAVERGLDMLVGLLAVLKAGGAYVPLDPEYPQERLHYMMQDSGIQLLLTQSPLLERLRDGVEVPHLCLDQQGLDGYSLNNPAPRAQADNLAYVMYTSGSTGRPKGVDISHRALTQHAQVSRDYFNMSAADRGLQFSTFNFDAFVEQLYPALICGASVVIRGKALWDSETFYRELIEQGISIVDLSTAYWFMLGKDFASREPRDFGRLRQLNLGGEAMPAEGVAAWKKAGLKHACLLNTYGPTEATVSVTAHDCSRYLEDGQALPSQMPLGKGLPGRSIYLLDNSGNLTLSGATGELMIGGELLARGYHDRPGLTAERFIPDPFSSDGGRLYRSGDLARYDAEGVIEYAGRI…
CHA0	Thr	Thr	EAQAARAPQAIALTFAGQSLDYQQLNERANRLAHKLIEQGVGPNVLVGLAVERSLEMVIGLLAILKAGGAYVPLDPAYPQDRLQHMMQDSAIALLLTQEHLLQGLPAFAGSTWLLEQPLDGYRVDNPEVGVTPENLAYVIYTSGSTGKPKGTLQPHHNVLRLFAATEQWFQFGAEDVWSLFHSYAFDFSVWEIFGALLYGGRLLIVPQEVARSAQDFYPLLCSEGVTVLNQTPSAFRQLMHVACSAEPAHRLRYIVFGGEALEVNTLQPWFQRFGDQRPQLVNMYGITETTVHVTYRPLSVADLSLAGASPIGELIPDMSWYLLDSNLQPVPKGCIGELYVGRAGLAWGYLNRGDLSAARFVPDPFGEAGGRLYRTGDLARYQADGSIGYIGRIDHQVK…
CHA0	Ala	Ala	EAQALKSPESEALLFAGQCLSYRELNARANRLAHKLIELGVGPEVRVGVALQRTPEMVVALLAVLKAGGAYVPLDPDYPQDRLAHMLRDSQAQILLTESALLSLLPSVESLQTLQLDAQPGWLDAYSPENPPQRATADNLAYVIYTSGSTGLPKGVAIAHRNVLALIDWSNRVYSADDLQGVLASTSICFDLSVWELFVTLSSGGSIVLARNALELPELADRDRVRLINTVPSAIAALHRSGQIPPSVRIINLAGEPLKQALVDSLYQQPGLVHVYDLYGPSEDTTYSTYTRREAGGQANIGRAISNTQSYILSPDLQPVPVGSAGELYLAGAGVTRGYLARPGLTAEKFVPNPFSSDGGRVYRTGDLTRYRADGVIEYIGRIDHQVKIR
CHA0	Ala	Ala	QAQVQKTPDAQALLFAGQCLSYRELNARANRLAHKLIELGVGPEVRVGVALQRTPEMVVALLAVLKAGGAYVPLDPDYPQDRLAHMLRDSQAQILLTESALLSLLPSVESLQTLQLDAQPGWLDAYSPENPPQRATADNLAYVIYTSGSTGLPKGVAIAHRNVLALIDWSNRVYSADDLQGVLASTSICFDLSVWELFVTLSSGGSIVLARNALELPELADRDRVRLINTVPSAIAALHRSGQIPPSVRIINLAGEPLKQALVDSLYQQPGLVHVYDLYGPSEDTTYSTYTRREAGGQANIGRAISNTQSYILSPDLQPVPVGSAGELYLAGAGVTRGYLARPGLTAEKFVPNPFSSDGGRVYRTGDLTRYRADGVIEYIGRIDHQVKIR
CHA0	FoOHOrn	OHOrn	FADQAAKAPDAPAVFFAEQRLSYRELDTQANQLAHKLIELGVGPEVRVAIAMPRCAEIMVAFLAVLKAGGVYVPLDIEYPQDRLRYMMQDSGAWLLLTQSHLLDRLPIPEGLPTLSVEGAADFAAYPVTSPQVDLAEENLAYVIYTSGSTGLPKGVAVSHGPLAMHSLATGERYEMSPADCELHFMSFAFDGSHEGWMHPLIYGASVLIRDDSLWSPEFTYEQMHRYGVTVGVFPPVYLQQLAVHAERDGNPPAVRVYCFGGDAVPQASYDLAWRVLRPKYIFNGYGPTETVVTPLIWKAKAGDPCDAAYAPIGNIVGNRSAYVADANLNLLPVGVAGELYLGGLGVARGYLDRPGLTAERFIPDPYSTTGARLYRSGDLTRYRTDGLVEYVGRVDHQV…
CHA0	Lys	Lys	EAQAARTPDAVALLCAGQQLSYGQFNQRANQLAHKLIEQGVGPDVRVGIAVERGLDMIVGLLAVLKAGGAYVPLDPEYPQERLHYMMQDSGIQLLLTQSPLLERLQDGLAVPYLCLDQAPVWLAGMAQGNPPERSSAENLAYVMYTSGSTGRPKGVGITHNALSQHARATASHFNMTAADRGLQFSTFNFDAFVEQLYPALIRGASVVIRGKALWDSETFYRELIEQGISIVDLSTAYWFMLGKDFAAKGPRDFGRLRQLNLGGEAMPAEGVAAWKQAGLKHACLLNTYGPTEATVSATAHDCGAYLKGTEPLPAVIPLGKALPGRSIYLLDSSGNLPLNGVIGELMIGGDLLARGYHDRPGLTAERFIPDPFSSDGGRLYRSGDLARYDAEGVIEYAG…
Pf0-1	Ala	Ala	EQQVAAQPGALAVTFGEQTFTYAEIDARANALAHKLIECGVSPEVRVGVAMQRSDSLLVALLAVLKAGGAYVPLDPDYPADRVAYMLEDSRALVLLTEHAVAETLSVSAETQVLLLDRIGAELAAYPSRAPVTAVTPDNLAYVIYTSGSTGKPKGVAIAHRNVQALIDWSRTVYSRDDIQGVLASTSVCFDLSVWELFVTLANGGSLIIARNALELPQLSARDQVRLINTVPSAINALQRDGAIPSSVRIINLAGEPLKQSLVEALYQQASVEHVYDLYGPSEDTTYSTWTRRAAGGTPSIGRPLTGTASYLLDADLQPVPQGAAAELYLAGAGITRGYLGRAAMTAEKYVPNPFASNGERLYRTGDLTRYQADGALQYVGRIDHQVKVR
Pf0-1	AcOHOrn	OHOrn	AAERPQRTAVIFNGQHFSYGEIDQRANQLAHALIARGVGAETRVGVALPRSESVIVALLAVLKAGGAYVPLDTSYPRERLAYLIEDSGLALLISDSSVSAQLPVAESVPVLELDRLDLREWPIKAPQVQLDPDNLAYVIYTSGSTGNPKGVSVAHGPLAMHCQAIGQRYEMRDSDCEFHFMSFAFDGAHERWLTSLTHGASLLIRDDTLWTPEQTYNAMREHGVTVVAFPPVYLQQLAEHAEREGHPPKVRIYCFGGDAVPSASFERVKRALDPDYIINGYGPTETVVTPLIWKAGREVPCGAAYAPIGSRIGDRSAYVLDADLNLLPQGMAGELYLGGTGLARGYLNRPGLTAERFVADPFSHTGGLLYRTGDLVRQRADGTFDYLDRIDNQVKIR
Pf0-1	Orn	Orn	FEQQVQRAPDQVALYFADQHLTYAALNQQANRLAHTLRQRGVGPDVLVGIAVERSLEMIVSLLAVLKAGGAYVPLDPQYPGDRLTCMIEDSGLLLLLSQSHLLERLPQVAGVEVLCVDRQPEQLQSADLPNLTLADNLAYVMFTSGSTGRPKGVGINQASLTKHACVTVDLMALTAQDCVLQFSTFNFDGFVEQLYPALITGASVVLRGTEIWDSETLYSEMLDKRISVIDLTTAYWGMLAKDFAEVGPRDYGVLRQVHAGGEAMPPEGMAAWNKAGLAHVRLLNTYGPTEATVTATSLDCGDYVTGAEPTPSTLPIGSALPGRSIYLLDIAGQPVPVGAVGELMIGGELLARGYFNRPDLSAERFMPDPFSVQPGARLYRTGDLARFRADGVIEYIGR…
Pf0-1	Ser	Ser	EDQVRATPDALALVFGEQRLTYAQLNARANRLADVLIEHGVGPEVLVGISVERSLEMVVGLLAILKAGGAYLPLDPEYPQDRLAYMFEDSGVALLLTQSHLLAQLPVPAGLHSLVLDQDGDWLEGRSEANPALNIDPENLAYVIYTSGSTGKPKGAGNRHSALVNRLCWMQQAYQLTADDSVLQKTPFSFDVSVWEFFWPLMTGSSLVVAAPGAHRDPAQLIQVITEQRITTLHFVPSMLQAFLQDPAVAECTSLTRIVCSGEALQVDAQQQVFAKLPNAGLFNLYGPTEAAIDVTHWTCRDEGRDSVPIGQPIANLSTYILDNSLAPLPVGVIGELYLGGEGLARGYHRRPALTAERFVTSPFGDGQRLYRTGDLARYRADGVIEYAGRMDHQVKIR
Pf0-1	Ser	Ser	EDQVRATPDSLALVFGEQRLTYAQLNARANQLADVLIEHGVGPEVLVGISVERSLEMVVGLLAILKAGGAYLPLDPEYPQDRLAYMFEDSGIALLLTQSHLLAQLPVPAGLRSLVLDQDGDWLEGRSEANPELNLDPENLAYVIYTSGSTGKPKGAGNRHSALVNRLCWMQQAYQLTADDSVLQKTPFSFDVSVWEFFWPLMTGSSLVVAAPGAHRDPAQLIQVITEQRITTLHFVPSMLQAFLQDPAVAECTSLTRIVCSGEALQVDAQQQVFAKLPNAGLFNLYGPTEAAIDVTHWTCRDEGRDSVPIGQPIANLSTYILDNSLAPLPVGVIGELYLGGEGLARGYHRRPALTAERFVTSPFGDGQRLYRTGDLARYRADGVIEYAGRMDHQVKIR
Pf0-1	Ser	Ser	EDQVRATPNALALVFGEQRLTYAQLNARANQLAAVLIEHGVGPEVLVGISVERSLEMVVGLLAILKAGGAYLPLDPEYPQDRLAYMFEDSGIALLLTQSHLLAQLPVPAGLRSLVLDQEGDWLEGRSEANPALNIDPENLAYVIYTSGSTGKPKGAGNRHSALVNRLCWMQQAYQLTADDSVLQKTPFSFDVSVWEFFWPLMTGSSLVVAAPGAHRDPAQLIQVITEQRITTLHFVPSMLQAFLQDPAVAECTSLTRIVCSGEALQVDAQQQVFAKLPNAGLFNLYGPTEAAIDVTHWTCRDEGRDSVPIGQPIANLSTYILDNSLAPLPIGVIGELYLGGEGLARGYHRRPALTAERFVTSPFGDGQRLYRTGDLARYRADGVIEYAGRMDHQVKIR
Pf0-1	OHAsp	OHAsp	AEWAQSTPEALALTDETGRLNYAQLQAQVERLAAGLHAEGVGRDSIVALALPRSAALVVAMLAIWRVGAAYLPLDRQWPVARQQLMLEQARAGLLLTDATQVAEWQDSALPVRSIDQLLATDAAPAPAHETQGSDLAYVLFTSGSTGTPKGVSIEHRHLLNYTASVSSALGLDGHRHFGLTSTVAADLGNTTLFGALFNGAALHVASDAQMQDAQAFAGYVQAHAIDCLKIVPSHLAALLDSETPHLPRTLVLGGEAIAAPLIQRIAQVRSDCQVFNHYGPTETTVGVMVHKVAPGQGAGWLSQVLDNNQVYVLDAQQQLAPVGVVGELYVGGAQLFRGYVNVDAEAGLLIDSPFISGERLYRTGDLARYLPEGAIVLHGRRDHQIKVR
Pf0-1	Thr	Thr	EAQVARDGAAIALTFGAQQVSYAELNRQANRLAHRLIANGVGPDVLVGIAAERSPQMLIGLLAILKAGGAYVPLDPAYPADRLAYMIEDSRIDWVLTQSHLREQLPLPAHVRCVLLDDATSLIDAAEHNPDVAVQPDNLAYVIYTSGSTGKPKGALLAHHNVVRLFEATSGWFGFDQNDVWSLFHSYAFDFSVWEIFGALLYGGRLVIVPHAVSRSPQDVYTLLCEEKVSVLNQTPSAFKQLMKVACEADQPLTQHLRYVIFGGEAIEVKSLRPWFERFGDQTPQLINMYGITETTVHVTYRPLSLADLNAESASPIGVPIADLSWYLLDEGLNPVAKGCTGELYIGRAGLARGYLNRTDLTATRFIPDPFDSVAGGRLYRTGDLAKYCNDGSIEYVGR…
Pf-5	Asp	Asp	FARQVAAQPEAPALVFAGQCLSYRELDLRASRLAAALVARGVGPEVPVGIAVERSLEMVLGLLAVLKAGGAYVPLDPQYPEQRLSYMLEDSGVRLLLSETAVQPRLPVAARVEVLLLDQAQAWAPDSDPLAALPGMAAGNLAYSIYTSGSTGAAKGVSITHGALANYVQAIIQRLPLGAARTMAVVSTIAADLGHTTLFGALCSGSCLHVIDLDTGLDADAFGAYLHTHQIDVLKIVPSHLQALMSGEEPARSLPRQCLVLGGEACPAALVRRIATLAPECAVFNHYGPTETTVGALTMAAATLADERAVVPLGLPLANVRARVLDASLQPVAPGTPAELYLGGAGLARGYHQRAALTAERFVPDPFSGDGQRLYRTGDLARYLDGGVIDYLGRIDHQV…
Pf-5	DFoOHOrn	OHOrn	FADQAAKAPDAPAVFFAEQRLSYRELDTQANQLAHKLIELGVGPEVRVAIAMPRCAEIMVAFLAVLKAGGVYVPLDIEYPQDRLRYMMQDSGAWLLLTQSHLLDRLPIPDGLPTLSVERAADFAGYPASAPQVDLAEENLAYVIYTSGSTGLPKGVAVSHGPLAMHSLATGERYEMSPADCELHFMSFAFDGSHEGWMHPLIYGASVLIRDDSLWSPEFTYEQMHRYGVTVGVFPPVYLQQLAVHAERDGNPPAVRVYCFGGDAVPQASYDLAWRVLRPKYIFNGYGPTETVVTPLIWKAKAGDPCDAAYAPIGNIVGNRSAYVADANLNLLPVGVAGELYLGGLGVARGYLDRPGLTAERFIPDPYSTTGARLYRSGDLTRYRTDGLVEYVGRVDHQV…
Pf-5	Lys	Lys	EAQAARTADAVALLCAGQQLSYGQFNQRANQLAHKLIEQGVGPDVRVGIAVERGLDMIVGLLAVLKAGGAYVPLDPEYPQERLHYMMQDSGIQLLLTQSPLLERLRDGVEVPHLCLDQQGLDGYSLNNPAPRAQADNLAYVMYTSGSTGRPKGVDISHRALTQHAQVSRDYFNMSAADRGLQFSTFNFDAFVEQLYPALICGASVVIRGKALWDSETFYRELIEQGISIVDLSTAYWFMLGKDFASREPRDFGRLRQLNLGGEAMPAEGVAAWKKAGLKHACLLNTYGPTEATVSVTAHDCSRYLQDGQALPSQMPLGKGLPGRSIYLLDNSGNLTLSGATGELMIGGELLARGYHDRPGLTAERFIPDPFSSDGGRLYRSGDLARYDAEGVIEYAGRI…
Pf-5	[Thr	Thr	EAQAARAPQAIALTFAGQSLDYQQLNERANRLAHKLIEQGVGPNVLVGLAVERSLEMVIGLLAILKAGGAYVPLDPAYPQDRLQHMMQDSAIALLLTQEHLLQGLPAFAGSTWLLEQPLDGYRVDNPEVGVTPEDLAYVIYTSGSTGKPKGTLQPHHNVLRLFAATEQWFQFGAEDVWSLFHSYAFDFSVWEIFGALLYGGRLLIVPQEVARSAQDFYPLLCSEGVTVLNQTPSAFRQLMHVACSAEPAHRLRYIVFGGEALEVNTLQPWFQRFGDQRPQLVNMYGITETTVHVTYRPLSVADLSLTGASPIGELIPDMAWYLLDGNLQPVPKGCIGELYVGRAGLAWGYLNRGDLSAARFVPDPFGEAGGRLYRTGDLARYQADGSIGYIGRIDHQVK…
Pf-5	Ala	Ala	EAQALKSPEAEALLFAGQSLSYRELNARANRLAHKLIELGVGPEVRVGVALQRTPEMVVALLAVLKAGGAYVPLDPDYPQDRLAHMLRDSQAQILLTENALLSLLPSVESLQTLQLDAQPGWLDAYSPENPPQRATADNLAYVIYTSGSTGLPKGVAIAHRNVLALIDWSNRVYSTADLQGVLASTSICFDLSVWELFVTLSSGGSIVLARNALELPELADRDRVRLINTVPSAIAALQRSGQIPPSVRIINLAGEPLKQALVDSLYQQPGLVHVYDLYGPSEDTTYSTYTRREAGGQANIGRAISNTQSYILSPDLQPVPVGSAGELYLAGAGVTRGYLARPGLTAEKFVPNPFSSDGGRLYRTGDLTRYRADGVIEYIGRIDHQVKIR
Pf-5	DAla	Ala	EAQALKSPESEALLFAGQCLSYRELNARANRLAHKLIELGVGPEVRVGVALQRTPEMVVALLAVLKAGGAYVPLDPDYPQDRLAHMLRDSQAQILLTENALLSLLPSVESLQTLQLDAQPGWLDAYSPENPPQRATADNLAYVIYTSGSTGLPKGVAIAHRNVLALIDWSNRVYSTADLQGVLASTSICFDLSVWELFVTLSSGGSIVLARNALELPELADRDRVRLINTVPSAIAALQRSGQIPPSVRIINLAGEPLKQALVDSLYQQPGLVHVYDLYGPSEDTTYSTYTRREAGGQANIGRAISNTQSYILSPDLQPVPVGSAGELYLAGAGVTRGYLARPGLTAEKFVPNPFSSDGGRLYRTGDLTRYRADGVIEYIGRIDHQVKIR
Pf-5	DFoOHOrn	OHOrn	FADQAAKAPDAPAVFFAEQRLSYRELDTQANQLAHKLIELGVGPEVRVAIAMPRCAEIMVAFLAVLKAGGVYVPLDIEYPQDRLRYMMQDSGAWLLLTQNHLLDRLPIPEGLPTLSVEGAADFAAYPVTSPQVDLAEENLAYVIYTSGSTGLPKGVAVSHGPLAMHSLATGERYEMSPADCELHFMSFAFDGSHEGWMHPLIYGASVLIRDDSLWSPEFTYEQMHRYGVTVGVFPPVYLQQLAVHAERDGNPPAVRVYCFGGDAVPQASYDLAWRVLRPKYIFNGYGPTETVVTPLIWKAKAGDPCDAAYAPIGNIVGNRSAYVADANLNLLPVGVAGELYLGGLGVARGYLDRPGLTAERFIPDPYSTAGARLYRSGDLTRYRTDGLVEYVGRVDHQV…
Pf-5	Lys]	Lys	EAQAARTPDAVALLCAGEQLSYGQFNQRANQLAHKLIEQGVGPDVRVGIAVERGLDMIVGLLAVLKAGGAYVPLDPEYPQERLHYMMQDSGIQLLLTQSPLLERLQDGLAVPYLCLDQAPVWLAGMAQGNPPERSSAENLAYVMYTSGSTGRPKGVGITHNALSQHARATASHFNMTATDRGLQFSTFNFDAFVEQLYPALIRGASVVIRGKALWDSETFYRELIEQGISIVDLSTAYWFMLGKDFAAKGPRDFGRLRQLNLGGEAMPAEGVAAWKQAGLKHACLLNTYGPTEATVSATAHDCGAYLKGTEPLPAVIPLGKALPGRSIYLLDSSGNLPLNGVMGELMIGGDLLARGYHDRPGLTAERFIPDPFSSDGGRLYRSGDLARYDAEGVIEYAG…
NCPPB2192	Ser	Ser	EQQVQRTPQAPALVFGSTTLTYAQLDARANQLANFLREKGVGPDVLVGVCVERSIEMVVGLLAIIKAGGAYVPLDPEYPEDRLAYMIEDSGIELLLTQQSLQASLPSQAIEVIGLDRAGDWLSGFSTETPTVEVHALNLAYVIYTSGSTGKPKGAGNSHRALVNRLCWMQQAYGLDASDAVLQKTPFSFDVSVWEFFWPLMTGARLVVAAPGEHREPARLIDTIGRHAITTLHFVPSMLQAFIHEPGVQACASLKRIVCSGEALPLDAQLQVFAKLPGAGLYNLYGPTEAAIDVTHWTCVDEGADSVPIGRPIANLATYVLDAQLNPVPAGVSGELYLGGTGLARSYHRRPALTAERFVPSPFIAGERLYRTGDRVCQRADGVIEYLGRLDHQVKLR
NCPPB2192	Lys	Lys	AAQADATPDALAVQAGSERLTYAQLNQRANRLAHRLLEQGVGPGQRVGLAARRGPQLIVSLLAVLKSGAAYVPLDPKLPAERLAYMLADSRLSLLLGETGLLADLPLPQGLARVDFSASGEELAGYPTTNPSNHADRADLAYVIYTSGSTGQPKGVAIDHAALDQFCDTAAAYSALTPADRVLQFATFSFDGFVEQCYPPLCVGAALIMRGEDLWDAEWLAREIVEQGVTLADLPAAYWYLLAKECAASGRTLGNLRQVHVGGEAMAVEGVRAWHEAGLQGVRLLNTYGPTEATVVSSVHDCQLADAHDAYGMPIGRAIEGRALYVLDSGFELLPNCGVGELCIGASAGLAQGYFDRPALTAERFLPDPFSGVPGARLYRSGDLARYNERAVLEYVGRI…
NCPPB2192	Ser	Ser	EAQVLKAPGAQALAFGETRLTYAELNTRANQLAHQLIAHGVGPDVLVGIAVERSIEMVVGLLAILKAGGAYVPFDPEYPQERLQYMIEDSGIGLLLTQQALLKHLPIPQGLQTLVLDQLNNTGFSSENPNVPVTGENLAYVIYTSGSTGKPKGAGNRHSALTNRLCWMQQAYQLGASDTVLQKTPFSFDVSVWEFFWPLMTGARLVVAAPGDHRDPAKLVELINREQVSTLHFVPSMLQAFLQDTGVAQCTSLTRIVCSGEALPADAQQQVFAKLPQANLYNLYGPTEAAIDVTHWTCVEEGRDSVPIGRPIANLACYILDDNLEPAPVGVLGELYLGGEGLARGYHRRPSLTAERFAVSPFGHGERLYRTGDLARYRADGVIEYAGRIDHQVKLR
NCPPB2192	Ser	Ser	ETQVLKAPGAQALAFGDVSLSYSELNTRANQLAHQLIAHGVGPDVLVGIAVERSIEMVVGLLAILKAGGAYVPFDPEYPQERLQYMIEDSGIGLLLTQQALVSQLPVPQGLQTLVLDQLNNTGFSSENPNIPVTGENLAYVIYTSGSTGKPKGAGNRHSALTNRLCWMQQAYQLGASDTVLQKTPFSFDVSVWEFFWPLITGARLVVAAPGDHRDPARLVELINREQVSTLHFVPSMLQAFLQDTGVAQCTSLTRIVCSGEALPADAQQQVFAKLPQANLYNLYGPTEAAIDVTHWTCVEEGRDSVPIGRPIANLACYILDDNLEPVPVGVLGELYLGGEGLARGYHRRPSLTAERFAVSPFGHGERLYRTGDLARYRADGVIEYAGRIDHQVKLR
NCPPB2192	Thr	Thr	ERQVEKAPHAVALVCEGEQLTYGALNRRANRLAHALIAEGVGPEVLVGIAVERSFDMLVGLLAILKAGGAYVPLDPAYPQERLQYMIEDSGLTLLLTQAHLPGPDGVRRLLIDADYPAIEHNPQVAVGPQNLAYVIYTSGSTGKPKGTLLPHSNVLRLFQATEGWFDFGPQDCWSLFHSYAFDFSVWEIFGALLYGGRLLIVPQDVSRSPQAFFDLLCAEQVTVLNQTPSAFKQLMQVACAAEASRSTALRYVVFGGEALEVSSLRPWFERFGDAAPQLINMYGITETTVHVTYRPLSLADLDNGVSSPIGVAIPDLSWYVLDRDLNPVPAGCTGELYVGGAGLARGYLHRGDLSSTRFIPNLFSAAGERLYRTGDLARYGADGVIEYVGRIDHQVKIR
NCPPB2192	Ser	Ser	ETQVLKAPGAQALAFGDVSLSYSELNTRANQLAHQLIAHGVGPDVLVGIAVERSIEMVVGLLAILKAGGAYVPFDPEYPQERLQYMIEDSGIGLLLTQQALVSQLPVPQGLQTLVLDQLNNTGFSSENPNIPVTGENLAYVIYTSGSTGKPKGAGNRHSALTNRLCWMQQAYQLGASDTVLQKTPFSFDVSVWEFFWPLITGARLVVAAPGDHRDPARLVELINREQVSTLHFVPSMLQAFLQDTGVAQCTSLTRIVCSGEALPADAQQQVFAKLPQANLYNLYGPTEAAIDVTHWTCVEEGRDSVPIGRPIANLACYILDDNLEPAPVGVLGELYLGGEGLARGYHRRPSLTAERFAVSPFGHGERLYRTGDLARYRADGVIEYAGRIDHQVKLR
NCPPB2192	AcOHOrn	OHOrn	AQAERRPQAPAVLFDDHVTNFAELHSQSNRLAQYLVAQGVRPEVRVGVALSRGPQMLVALLAVLKAGGAYVPLDASYPRERLAYLMDDSGIGLLLTDSRLRGQLPLPTGLLALELDTLDLADWPDSAPSVRVHDESLAYVIYTSGSTGQPKGVCVAHGPLAMHCEAIGQRYAMTEDDCELHFMSFAFDGAHERWLTALTHGSRLAVRDDSLWSPEQTYAAMHRYGVSVVAFPPAYLLQLAEHAELHGNPPPVRIYCFGGDAVPNDSFERVRDALKPEHIINGYGPTETVVTPLIWKADALARCGAAYAPIGSRIGNRSAWVLSADLDVLPHSVAGELFLGGEGLARGYLDRPGMTAERFVPDPFGVPGGRLYRSGDRVRRREDGIFDYQGRVDHQVKIR
NCPPB2192	Thr	Thr	EAQAAQVPDAVALVLGDQQLSYGELNRQANRVAHALIAEGVGPEVLVGIAVERSFDMLVGLLAILKAGGAYVPLDPAYPADRLHYMIEDSGLKLLLTQWPQPTPAGVRNLSIQGDHPAIEHNPQVDVGPDNLAYVIYTSGSTGKPKGTLLPHRNVLRLFDATRGEFNFGPQDCWTLFHSYAFDFSVWEIFGALLHGGRLVIVPQEVSRSPQAFFELLCAEHVTVLNQTPSAFKQLMQVACADEASRTTSLRYVVFGGEALEVNSLRPWFERFGDSTPQLVNMYGITETTVHVTYRPLSLADLNNGASSPLGAAIADLSWYVLDADLHPVPKGCIGELYVGRAGLARGYLNRADLTSTRFVADPFSRDGGRLYRTGDLARYCANGVIEYAGRIDHQVKIR
NCPPB2192	Ser	Ser	EAQALKTPDAQALAFGDVTLSYSELNIRANQLAHQLIAHGVGPDVLVGIAVERSIEMVVGLLAILKAGGAYVPFDPEYPQERLQYMIEDSGIGLLLTQQALVSQLPVPQGLQTLVLDQLDSTGFSSENPAVPVSRENLAYVIYTSGSTGKPKGAGNRHSALTNRLCWMQQAYQLGASDTVLQKTPFSFDVSVWEFFWPLMTGARLVVAAPGDHRDPAKLVELINREQVSTLHFVPSMLQAFLQDTGVSQCTSLTRIVCSGEALPADAQQQVFAKLPQANLYNLYGPTEAAIDVTHWTCVEEGRDSVPIGRPIANLACYILDDNLEPVPVGVLGELYLGGEGLARGYHRRPSLTAERFAVSPFGHGERLYRTGDLARYRADGVIEYAGRIDHQVKLR
NCPPB2192	cOHOrn	OHOrn	ARHAEQRPHAPAAECQGAVLSYGELEMRANRLAHYLIAQGAGPEQVIGVALERSLDVLVALLAVLKSGAAYVPLDTDYPPERLAFMIEDSGMKHLISRAELAAGLPLPQHVQRVDLSRLDMDIAACPETAPMVAISEHSLAYLIYTSGSTGLPKGVAVTHGPLSMHCQAIAQLYEMDARTRELHFMSFAFDGAHERWLTTLSVGGTLVLRDNELWTPEQTCHALQHLNIDIACFPPAYLKQVAEFVQASGNAAPPVRIYCLGGDAVPEQTLAQVRTILQPRYITNGYGPTETVVTPMLWKAAADEPCGAAYAPIGRVVGQRSLWVLDDDLNPLPQGFAGQLFIGGYGVARGYHGRAAMTAERFVPDPFGAPGSRTYRSGDLVRLRDSGVLDYVGRLDHQ…
PAO1	Ser	Ser	FEEQVERTPTAPALAFGEERLDYAELNRRANRLAHALIERGVGADRLVGVAMERSIEMVVALMAILKAGGAYVPVDPEYPEERQAYMLEDSGVQLLLSQSHLKLPLAQGVQRIDLDQADAWLENHAENNPGVELNGENLAYVIYTSGSTGKPKGAGNRHSALSNRLCWMQQAYGLGVGDTVLQKTPFSFDVSVWEFFWPLMSGARLVVAAPGDHRDPAKLVELINREGVDTLHFVPSMLQAFLQDEDVASCTSLKRIVCSGEALPADAQQQVFAKLPQAGLYNLYGPTEAAIDVTHWTCVEEGKDAVPIGRPIANLACYILDGNLEPVPVGVLGELYLAGRGLARGYHQRPGLTAERFVASPFVAGERMYRTGDLARYRADGVIEYAGRIDHQVKLR
PAO1	Arg	Arg	FAHQAASAPEAIALVCGDEYLSYAELDMRAERLARGLRARGVAAEALVAIAAERSFDLVVGLLGILKAGAGYLPLDPNYPAERLAYMLRDSGARWLICQETLAERLPCPAEVERLPLETAAWPASADTRPLPEVAGETLAYVIYTSGSTGQPKGVAVSQAALVAHCQAAARTYGVGPGDCQLQFASISFDAAAEQLFVPLLAGARVLLGDAGQWSAQHLADEVERHAVTILDLPPAYLQQQAEELRHAGRRIAVRACILGGEAWDASLLTQQAVQAEAWFNAYGPTEAVITPLAWHCRTQEGGAPAIGRALGARRACILDAALQPCAPGMIGELYIGGQCLARGYLGRPGQTAERFVADPFSGSGERLYRTGDLARYRVDGQVEYLGRADQQIKIR
PAO1	Ser	Ser	FEEQVERTPTAPALAFGEERLDYAELNRRANRLAHALIERGVGADRLVGVAMERSIEMVVALMAILKAGGAYVPVDPEYPEERQAYMLEDSGVQLLLSQSHLKLPLAQGVQRIDLDQADAWLENHAENNPGIELNGENLAYVIYTSGSTGKPKGAGNRHSALSNRLCWMQQAYGLGVGDTVLQKTPFSFDVSVWEFFWPLMSGARLVVAAPGDHRDPAKLVALINREGVDTLHFVPSMLQAFLQDEDVVSCTSLKRIVCSGEALSADAQQQVFAKLPQAGLYNLYGPTEAAIDVTHWSCVEEGKDAVPIGRPIANLGCYILDGDLEPVPVGVLGELYLAGRGLARGYHQRPGLTAERFVASPFVAGERMYRTGDLARYRADGVIEYAGRIDHQVKLR
PAO1	FoOHOrn	OHOrn	AERARMAPDAVAVIFDEEKLTYAELDSRANRLAHALIARGVGPEVRVAIAMQRSAEIMVAFLAVLKAGGAYVPLDIEYPRERLLYMMQDSRAHLLLTHSHLLERLPIPEGLSCLSVDREEEWAGFPAHDPEVALHGDNLAYVIYTSGSTGMPKGVAVSHGPLIAHIVATGERYEMTPEDCELHFMSFAFDGSHEGWMHPLINGARVLIRDDSLWLPERTYAEMHRHGVTVGVFPPVYLQQLAEHAERDGNPPPVRVYCFGGDAVAQASYDLAWRALKPKYLFNGYGPTETVVTPLLWKARAGDACGAAYMPIGTLLGNRSGYILDGQLNLLPVGVAGELYLGGEGVARGYLERPALTAERFVPDPFGAPGSRLYRSGDLTRGRADGVVDYLGRVDHQVK…
PAO1	[Lys	Lys	QEQARLRPQAQALALEGQALSYAELNARANRLAHCLIARGVGPDVLVGIAVERSLDMVVGLLAILKAGGAYVPLDPTYPQDRLRHMLEDSAVGLLLSQEHLLPGLPLHEGLEVLSIDRLERDASVSTDDPVVNLRPENLAYVIYTSGSTGKPKGVAISHAALAQFSRIASGYSALTPEDRILQFATLSFDGFVEQLYPALTRGACVVLRGGDLWDTGELYRQIVEQGVTLADLPTAYWNLFLLDALAEPRRSYGALRQIHIGGEAMPLEGPKLWRQAGMGRVRLLNTYGPTEATVVSSVFDCSAENARVGNASPIGQALPGRTLLVLDEHLGLLPVGAVGELYIASRAGLARAYHDRPGLTAERFLPDPFGEPGSRLYRTGDLARRRGDGVIEYMGRAD…
PAO1	FoOHOrn	OHOrn	AERARMAPDAVAVIFDEEKLTYAELDNRANRLAHALIARGVGPEVRVAIAMQRSAEIMVAFLAVLKAGGAYVPLDIEYPRERLLYMMQDSRAHLLLTHSHLLERLPIPEGLSCLSVDREEEWAGFPAHDPEVALHGDNLAYVIYTSGSTGMPKGVAVSHGPLIAHIVATGERYEMTPEDCELHFMSFAFDGSHEGWMHPLINGARVLIRDDSLWLPERTYAEMHRHGVTVGVFPPVYLQQLAEHAERDGNPPPVRVYCFGGDAVAQASYDLAWRALKPKYLFNGYGPTETVVTPLLWKARAGDACGAAYMPIGTLLGNRSGYILDGQLNLLPVGVAGELYLGGEGVARGYLERPALTAERFVPDPFGAPGSRLYRSGDLTRGRADGVVDYLGRVDHQVK…
PAO1	Thr	Thr	FEEQARQRPQAVALILDEQRLSYGELNARANRLAHCLIARGVGADVPVGLALERSLDMLVGLLAILKAGGAYLPLDPAAPEERLAHILDDSGVRLLLTQGHLLERLPRQAGVEVLAIDGLVLDGYAESDPLPTLSADNLAYVIYTSGSTGKPKGTLLTHRNALRLFSATEAWFGFDERDVWTLFHSYAFDFSVWEIFGALLYGGCLVIVPQWVSRSPEDFYRLLCREGVTVLNQTPSAFKQLMAVACSADMATQQPALRYVIFGGEALDLQSLRPWFQRFGDRQPQLVNMYGITETTVHVTYRPVSEADLEGGLVSPIGGTIPDLSWYILDRDLNPVPRGAVGELYIGRAGLARGYLRRPGLSATRFVPNPFPGGAGERLYRTGDLARFQADGNIEYIG…
PAO1	Thr]	Thr	FEEQARQRPQAVALILDEQRLSYGELNARANRLAHCLIARGVGADVPVGLALERSLDMLVGLLAILKAGGAYLPLDPAAPEERLAHILDDSGVRLLLTQGHLLERLPRQAGVEVLAIDGLVLDGYAESDPLPTLSADNLAYVIYTSGSTGKPKGTLLTHRNALRLFSATEAWFGFDERDVWTLFHSYAFDFSVWEIFGALLYGGRLVIVPQWVSRSPEDFYRLLCREGVTVLNQTPSAFKQLMAVACSADMATQQPALRYVIFGGEALDLQSLRPWFQRFGDRQPQLVNMYGITETTVHVTYRPVSEADLKGGLVSPIGGTIPDLSWYILDRDLNPVPRGAVGELYIGRAGLARGYLRRPGLSATRFVPNPFPGGAGERLYRTGDLARFQADGNIEYIG…
B10	εLys	Lys	FEAQVARTAQAPAVRLATAPAPAFSYDELNSRSNRLAHQLRAQGVGPDVLVGVALGRSLELAAALLAVLKAGGAYVPLDPQTPAERLRHVLADSGLQLLLSDRQSLAELPPLDGIECLCLEQLPDSEQSDNLPVTVEADNLAYVIYTSGSTGRPKGVAVSHGALSEFVARAIDYSDLREGDRVLQFATSSFDGFVEQFFPPLCHGASVVMRDAPLWDSATLHQVIIDQGITLADLPAAYWYWLVQEYAAKPPASFGALRQIHVGGEAMAVDGLRLWQQAGLGHVRLLNTYGPTEATVVSTIHDCTALTAQDVSWRGMPIGHGLAARRLYVLDDDLNLLPQGAVGELYIGGPGLARGYQRQPSLSAERFIADPFADGQRLYRTGDRARLRGDGALEYVGR…
B10	DOHAsp	OHAsp	AREVARQPQALAARDLNQTVTFQALDQEANRLAHYLRAQGVDVGDPVAVLLERSLDWLTCVLAILKAGAVYMPLDVKAPSARLQQMLGAAQPRALIGAEGDARLSELAGEGCQGLEFAPGQWQSLPTSAPELTLYAQSPAYVIHTSGSTGQPKGVLVSHGALGSYVRGVLERLAPAPEASMALVSTIAADLGFTVLFGALCSGRLLHVLPEELGFDPDRFAEYMARHRVGMLKIVPGHLAALLQAAKPADVLPEHALIVGGEACSPALVERVQQLKPGCRLINHYGPSETTVGVLTHEVEELAALARSVPIGTALAGAHVYVLDDVLNPVADQVAGELYIGGDSVALGYLNQPALTAERFLPDPFGAAGARVYRSGDRVRRNREQALEFIGRADDQVKVR
B10	Ala	Ala	AAQVQRQPQANAVLFAEQSIAYQDLDTRANRLAHKLQGMGVGPEVRVGVCMRRTPQMLVGLLAILKAGGAYVPLDPDYPQERLLHMLDDSRAAVLLTEPAALAMLPETLSAQVLLVDESVASEYPATAPLVNLAAENLAYVIYTSGSTGKPKGVAISHDNLSALIQWSAGVYREEQLRGVLASTSICFDLSVWEIFVTLACGGCLVLTDNALALADLPAREQVTLINTVPSAIAALQRAGQIPASVGTINLAGEPLKQSLVDSLYASTQVQQVYDLYGPSEDTTYSTFTLRTPQGQANIGRPLDNTVAYMLDSQLQALPEGVAAELYLAGAGVTRGYLRRAALTAERFVPNPYASNGERLYRTGDLVRQGDDGNIEYIGRADHQVKIR
B10	DThr	Thr	EAQAERHADAVAVTFAGQRLSYAELNHRANQWAHTLIEQGVGPDVRVGVAVERSLDMIVAILAVLKAGGAYVPLDPSYPDDRLSYMIDDSGIHLLLTQGHLLGQLPIPPGLVCLDLDQTPEHGISSNPPCLTTPDNLAYVIYTSGSTGKPKGALLPHGNVMRLFSATAHWFDFGAQDSWTLFHSYAFDFSVWEIFGALLYGGKLVVVPHDVSRSPEDFYTLLCDENVTVLNQTPSAFKPLMQVACESSRSNALRYVVFGGEALEVQNLRPWFERFGDRAPTLINMYGITETTVHVTYRPLSLADLQSNHSSPIGAPIVDLSWYLLDSSLNLVPQGCIGELYIAGAGLARGYLNQAGMTATRFVPDPFNRKAGQRLYRTGDLARLRGDGVIEYIGRIDHQ…
B10	Ala	Ala	FEARVAAHPQALALSHAGVALSYGELNRRANQLARHLVTLGVTAEVRVGVALPRSAELVIALMAVLKAGGTYVPLDPDYPADRVAYMLDDSQAKVLLTQQALLAQLPSSEAQVVLVEAGGEAFAAQAPDNLPARADSANLAYVIYTSGSTGKPKGVAIAHRNVQALIHWSAEVYSEDDLQGVLASTSVCFDLSVWEIFVTLARGGYVVMARNALELADLPERDQVRLINTVPSAIAALQRIGQIPPGVRIINLAGEPLKQALVDTLYRETSVAHVYDLYGPSEDTTYSTWTRRELGGQANIGRPLRNTTAYLLDEQLQQAPVGIAAELYLAGEGITRGYLLRPGLTAERFVPNPLASNGERMYRTGDLTRFMDDGRIEYVGRIDHQVKVR
B10	DcOHOrn	OHOrn	HAQQQPDAIAVQCAGESLTYAELERQANRLAQCLIAHGAGPEVVIGVALPRSLEMLVSFLAVLKSGAAYVPLDIDYPPERLAYMIEDSRMALLLTQTSLRATLPAPHGVLRLEIDQLDRSLYSDAAPVCDVHEQSLAYLVYTSGSTGRPKGVAVTQGPLSMHCQAIAELYEMDASSCELHFMSFAFDGAHERWLSTLYSGGRLVIRDGCLWTPEQTYQALHDYGVTIACFPPAYLKQLAEYAAASGIAPPPVRIYCFGGDAVPEQTFEQVKAALRPQFFTNGYGPTETVVTPMLWKVAISQHCEAAYAPIGRAVGARSLYVLDDDLNPLPPGFAGELYIGGYGVARGYYGRPDLTSERFVPNPFAPGERLYRSGDLVRRRADGVVDYVGRIDHQVKVR
1_60_II	Ser	Ser	FEEQVERTPTAPALAFGEERLDYAELNRRANRLAHALIERGIGADRLVGVAMERSIEMVVALMAILKAGGAYVPVDPEYPEERQAYMLEDSGVELLLSQSHLKLPLAQGVQRIDLDRGAPWFEDYSEANPDIHLDGENLAYVIYTSGSTGKPKGAGNRHSALSNRLCWMQQAYGLGVGDTVLQKTPFSFDVSVWEFFWPLMSGARLVVAAPGDHRDPAKLVALINREGVDTLHFVPSMLQAFLQDEDVASCTSLKRIVCSGEALPADAQQQVFAKLPQAGLYNLYGPTEAAIDVTHWTCVEEGKDAVPIGRPIANLACYILDGNLEPVPVGVLGELYLAGRGLARGYHQRPGLTAERFVASPFVAGERMYRTGDLARYRADGVIEYAGRIDHQVKLR
1_60_II	FoOHOrn	OHOrn	AERARLAPDAPAVLFDDQVLSFAELDSRANRLAHALIARGVGPEVRVAIAMQRSAEIMIAFLAVLKSGGAYVPLDIEYPRERLLYMMQDSRAHLLLTQSHLLDRLPIPDGLSCLCLDREQEWAGFPAHDPEVALHGDNLAYVIYTSGSTGMPKGVAVSHGPLAAHIVATGERYEMTPADCELHFMSFAFDGSHEGWMHPLINGARVLIRDDSLWLPEQTYAQMHRHGVTVAVFPPVYLQQLAEHAERDGNPPAARVYCFGGDAVAQASYDLAWRALRPQYLFNGYGPTETVVTPLLWKARPDDPCGAAYMPIGTLLGNRSGYILDAQLNLLPVGVAGELYLGGEGVARGYLERPALTAERFVPDPFGAPGSRLYRSGDLTRGRADGVVDYLGRVDHQVK…
1_60_II	Orn	Orn	FASRAAMEPERVALLFEERQLSYGELNAQANRLAHRLIELGVGPDVLVGIAVERGLEMIVSLLAVLKAGGAYVPLDPEYPQERLGYMIEDSGIALLLSQSHLLQRLPAASGIACLALDQAWDWQDRPASDPQLRAHPQNLAYVMFTSGSTGRPKGVGISRESLSRHTHVSLEFFGIGPDDRVLQFSTFNFDGFVEQLYPPLACGASVVLRGTEIWDSETLYREIVERRITTVDLTTAYWNMLAKDFANQGVRDYGALRQVHAGGEAMPPESLVAWKAAGLEHVRLLNTYGPTEATVTVTTLDCAPYVDGSKAIPATMPIGKVLPGRAIYLLDDAGQPAPVGAVGELVIGAELLARGYFKRPDLTAARFIPDPFDEQGGGRLYRTGDLARYGADGVIEYV…
1_60_II	Gly	Gly	FEAQAGLTPDAPALLFGEERLSYAELNALANRLAWRLREEGVGSDVLVGIALERGVPMVVALLAVLKAGGAYVPLDPQYPADRLQYMIDDSGLRLLLLLSQQSVLARLPQSDGLQSLLLDDLERLVHGYPAENPDLPEAPDSLCYAIYTSGSTGQPKGVMVRHRALTNFVCSIARQPGMLARDRLLSVTTFSFDIFGLELYVPLARGASMLLASREQAQDPEALLDLVERQGVTVLQATPATWRMLCDSERVDLLRGCTLLCGGEALAEDLAARMRGLSASTWNLYGPTETTIWSARFCLGEEARPFLGGPLENTGLYILDSEMNPCPPGVAGELLIGGDGLARGYHRRPGLTAERFLPDPFAADGSRLYRTGDLARYRADGVIEYLGRIDHQVKIR
1_60_II	Thr	Thr	ERQAAERPRATAVVYGERALDYGELNLRANRLAHRLIELGVGPDVLVGLAAERSLEMIVGLLAILKAGGAYVPLDPRYPSDRLGYMIEDSGIRLLLTQRAARERLPLGEGLPCLLLDAEHEWAGYPESDPQSAVGVDNLAYVIYTSGSTGKPKGTLLPHGNVLRLFDATRHWFGFSADDAWSLFHSYAFDFSVWEIFGALLHGGRLVIVPYETSRSPEDFLRLLCRERVTVLNQTPSAFKQLMQVACAGQEVPPLALRHVVFGGEALEVQALRPWFERFGDRAPRLVNMYGITETTVHVTYRPLSLADLDGGAASPIGEPIPDLSWYLLDAGLNPVPRGCIGELYVGGAGLARGYLNRPELSCTRFVADPFSTTGGRLYRTGDLARYRCDGVVEYVGRI…
1_60_II	Ser	Ser	FEEQVERTPTAPALAFGEERLDYAELNRRANRLAHALIERGIGADRLVGVAMERSIEMVVALMAILKAGGAYVPVDPEYPEERQAYMLEDSGVQLLLSQSHLKLPLAQGVQRIDLDQADAWLENHAENNPGVELNGENLAYVIYTSGSTGKPKGAGNRHSALSNRLCWMQQAYGLGVGDTVLQKTPFSFDVSVWEFFWPLMSGARLVVAAPGDHRDPAKLVALINREGVDTLHFVPSMLQAFLQDEDVASCTSLKRIVCSGEALPADAQQQVFAKLPQAGLYNLYGPTEAAIDVTHWTCVEEGKDAVPIGRPIANLACYILDGNLEPVPVGVLGELYLAGRGLARGYHQRPGLTAERFVASPFVAGERMYRTGDLARYRADGVIEYAGRIDHQVKLR
1_60_II	cOHOrn	OHOrn	EWSRRTPDATALVFDERSHSFAELDARANRLAHALVERGVAADVRVGVALPRGTELVVALLAVLKAGGAYVPLDLAYPRERLAYLMQDSGIALLLSESQALVQLPVPAGVPALALDRLDLLEHPAQAPQVEVHPANLAYVIYTSGSTGLPKGVAVSHGPLAMHIDAVGERYEMSPADRELHFMSFAFDGAHERWLTALGHGGSLLLRDDALWTPEQTYAAMQRHGVTVAAFPPVYLQQLAEHAERDGNPPPVRIYCFGGDAVPVAGFELAKRALKPRYIINGYGPTETVVTPLIWKAAMDTECGAAYAPIGSFVGERCGYVLDADLNPLPAGVAGELYLGGVGLARGYLQRPGLSAERFVANPFSRAGERLYRTGDLVRQREDGTFDYLGRIDNQVKVR
206_12_III	Ser	Ser	FEHQVQRSPEAPALVFGEQRLSYGELNRRANRLAHALIARGVGAESLIGVAMERSVELVIALMGILKAGGAYVPLDPEYPQERLSYMLEDSGVRLLLTQAHLLDGLPVSAEVQPLMLAADSEWLEGFDASDPEVAVTGENLAYVIYTSGSTGRPKGAGNRHSALTNRLCWMQDAYQLDGSDAVMQKTPFSFDVSVWEFFWPLMVGARLVLAQPGDHRDPSRLMDLIGRESISTLHFVPSMLQAFLQAPGVSACTSLKRIVCSGEALPVDAQQRVLAELPGVRLYNLYGPTEAAIDVTHWDCREEGRDTVPIGRPIANLRCYVLDDALEPVPVGALGELYLAGAGLARGYHLRPALSAERFLADPFATGERMYRTGDLARYRADGVIEYAGRIDHQVKLR
206_12_III	Dab	Dab	FEAQVDRLGERVAATCRDRAWSYRQLDAEANRVAWGLLEAGVERDRAVALLADRGLELMAMMIGTFKAGAAYLPLDPSLPRSRLVNLLKLGGVPALVVGEGHQALARELLEELPEESRPALLDWAAQQGQGKCEQRPGIVAPTNGLAYVIYTSGSTGHPKGVMVEQAGMLNNQLSKVPLLALDENDVIAQTASQSFDISVWQFLAAPLFGAQVDILPNDIAHDPLALSRRVRERGITVLELVPSLIQEVLDDPQETLPGLRWMLSTGEALSPELARRWLTRYPQVGLMNAYGPAECSDDVSFFRVDTQSTGGTYLPIGQATDNNHLQVLDDDLLPVPLGGIGELYVSGTGVGRGYLADPGRTALAFLPDPYAQVPGSRIYRTGDLACRGKGDQLEYVGR…
206_12_III	FoOHOrn	OHOrn	AEQARRAPEAIAVLFGEQRLSYGELDSQANRLAQRLVELGVGPEVRVAIAMRRSAEIMVAFLAVLKAGGAYVPLDIAYPAERLRYMLEDCGAALVLTQRDVLERLPLPAGLASLAVDDPGEWQDRPEGAPEVDLAEENLAYVIYTSGSTGLPKGVAVSHGPLVSHIRATGERYETSPADCELHFMSFAFDGAHEGWMHPLINGARVLVRDDSIWLPEETYAQMHRHGVTIGVFPPVYLQQLAEHAERDGNPPPVRVYCFGGDAVPQASYELAWESLRPDYLFNGYGPTETVVTPLLWKARPQDPCGAAYAPIGTLLGRRRAYVLGADLDLLPLGLAGELYLGGEGVARGYLDRPALTAERFVPDPYGNGERVYRSGDLTRARADGLVDYLGRVDHQVKIR
206_12_III	Gln	Gln	EAQAARTPEATAVVHGEIELSYRELNRRANLLAHRLRAEGVGPDVPVGIAMQRSPELVVALLAVLKAGGAYVPMDPGYPAERLAFLAEDSGIGLLLTQTFLQDELPFNAQLTNLCLDDPSLFQNVPAQWDGNPEQRACPEHLAYVIYTSGSTGRPKGVGITHGALVNHMRWMQERFQLAAHERVLQRTSSSFDASVWEFWLPLMSGARLHLAPAELGTSLESLWGLVEAQRINVLQMPPSLLQALLPFAGDDQLDSLRLLCCGGEALSGALLEQLGRRWNGELVNLYGPTEATIDACCFSAPVKEVGGEIPIGAPIAGVRARILDAAGGVCPVGCRGELLIAGAGLARGYLGRPGLTAERFVPDPYGDGERIYRTGDLARLRRDGQIDYLGRLDHQVKIR
206_12_III	Gln	Gln	EAQAARTPEATAVVHGEIELSYRELNRRANVLAHRLRAEGVGPDVPVGIAMQRSPELVVALLAVLKAGGAYVPMDPSYPAERLAFLAEDSGIGLLLTQTFLQDELPFNAQLTNLCLDDPSLFQNVPAQWDGNPEQRACPEHLAYVIYTSGSTGRPKGVGITHGALVNHMRWMQERFQLAAHERVLQRTSSSFDASVWEFWLPLMSGARLHLAPAELGTSLESLWGLVEAQRINVLQMPPSLLQALLPFAGDDQLDSLRLLCCGGEALSGALLEQLGRRWNGELVNLYGPTEATIDACCFSAPVKEVGAEIPIGAPIAGVRARILDAAGGVCPVGCRGELLIAGAGLARGYLGRPGLTAERFVPDPYGDGERIYRTGDLARLRRDGQIDYLGRLDHQVKIR
206_12_III	FoOHOrn	OHOrn	AEQARRAPEAIAVLFGEQRLSYGELDSQANRLAQRLVELGVGPEVRVAIAMRRSAEIMVAFLAVLKAGGAYVPLDIAYPAERLRYMLEDCGAALVLTQRDVLERLPLPAGLASLAVDDPGEWQDRPEGAPEVDLAEENLAYVIYTSGSTGLPKGVAVSHGPLVSHIRATGERYETSPADCELHFMSFAFDGAHEGWMHPLINGARVLVRDDSIWLPEETYAQMHRHGVTIGVFPPVYLQQLAEHAERDGNPPPVRVYCFGGDAVPQASYELAWESLRPDYLFNGYGPTETVVTPLLWKARPQDPCGAAYAPIGTLLGRRRAYVLGADLDLLPLGLAGELYLGGEGVARGYLDRPALTAERFVPDPYGNGERVYRSGDLTRARADGLVDYLGRVDHQVKIR
206_12_III	Gly	Gly	FEAQAGRFADAPAVLFDGELLTYGELNRRANRLAHYLLAEGVGTESLVGIAMERGPDMLVGLLAVLKAGAAYVPLDPDYPRERLAYMLEDSGVRLVLSQSWLSPGLPLAKGVAALDLDRTGWLDGYPSNDPLRPLAAENLAYVIYTSGSTGRPKGVQIEHRSLLNFLASMAREPGCTSSDRLLQLTSLSFDIAGLELYLGLTRGACIVMPKAQQSKDPQALLALIEEAEVSIIQATPATWRMLLDGAPERAEVLRGRKALCGGEALGGGLARRLLAHVDSLWNVYGPTETTIWSSCQRVLDSEVIHLGGPIGNTALHVLDDELEPMPAGGGGELLIGGGGLARGYFARPALTAERFVPNPFDAHGGRLYRTGDLASRRSDGVIDYLGRVDHQVKIR
R_IV	Ser	Ser	FEHQVQRSPEAPALVFGEQRLSYGELNRRANRLAHALIARGVGAESLIGVAMERSVELVIALMGILKAGGAYVPLDPEYPQERLSYMLEDSGVRLLLTQAHLLDGLPVSAEVQPLVLAADSERLEGFDASDPEVAVTGENLAYVIYTSGSTGRPKGAGNRHSALTNRLCWMQDAYQLDGSDAVMQKTPFSFDVSVWEFFWPLMVGARLVLAQPGDHRDPSRLMDLIGRESISTLHFVPSMLQAFLQAPGVSACTSLKRIVCSGEALPVDAQQRVLAELPGVRLYNLYGPTEAAIDVTHWDCREEGRDTVPIGRPIANLRCYVLDDALEPVPVGALGELYLAGAGLARGYHLRPALSAERFLADPFATGERMYRTGDLARYRADGVIEYAGRIDHQVKLR
R_IV	Dab	Dab	FEAQVDRLGERVAATCRDRAWSYRQLDAEANRVAWGLLEAGVERDRAVALLADRGLELMAMMIGTFKAGAAYLPLDPSLPRSRLVNLLKLGGVPALVVGEGHQALARELLEELPEESRPALLDWAAQQGQGKCEQRPGIVAPTNGLAYVIYTSGSTGHPKGVMVEQAGMLNNQLSKVPLLALDENDVIAQTASQSFDISVWQFLAAPLFGAQVDILPNDIAHDPLALSRRVRERGITVLELVPSLIQEVLDDPQETLPGLRWMLSTGEALSPELARRWLTRYPQVGLMNAYGPAECSDDVSFFRVDTQSTGGTYLPIGQATDNNHLQVLDDDLLPVPLGGIGELYVSGTGVGRGYLADPGRTALAFLPDPYAQVPGSRIYRTGDLACRGKGDQLEYVGR…
R_IV	FoOHOrn	OHOrn	AEQARRAPEAIAVLFGEQRLSYGELDSQANRLAQRLVELGVGPEVRVAIAMRRSAEIMVAFLAVLKAGGAYVPLDIAYPAERLRYMLEDCGAALVLTQRDVLERLPLPAGLASLAVDGPGEWQDRPEGAPEVDLAEENLAYVIYTSGSTGLPKGVAVSHGPLVSHIRATGERYETSPADCELHFMSFAFDGAHEGWMHPLINGARVLVRDDSIWLPEETYAQMHRHGVTIGVFPPVYLQQLAEHAERDGNPPPVRVYCFGGDAVPQASYELAWESLRPDYLFNGYGPTETVVTPLLWKARPQDPCGAAYAPIGTLLGRRRAYVLGADLDLLPLGLAGELYLGGEGVARGYLDRPALTAERFVPDPYGNGERVYRSGDLTRARADGLVDYLGRVDHQVKIR
R_IV	Gln	Gln	EAQAARTPEATAVVHGEIELSYRELNRRANLLAHRLRAEGVGPDVPVGIAMQRSPELVVALLAVLKAGGAYVPMDPGYPAERLAFLAEDSGIGLLLTQTFLQDELPFNAQLTNLCLDDPSLFQNVPAQWDGNPEQRACPEHLAYVIYTSGSTGRPKGVGITHGALVNHMRWMQERFQLAAHERVLQRTSSSFDASVWEFWLPLMSGARLHLAPAELGTSLESLWGLVEAQRINVLQMPPSLLQALLPFAGDDQLDSLRLLCCGGEALSGALLEQLGRRWNGELVNLYGPTEATIDACCFSAPVKEVGGEIPIGAPIAGVRARILDAAGGVCPVGCRGELLIAGAGLARGYLGRPGLTAERFVPDPYGDGERIYRTGDLARLRRDGQIDYLGRLDHQVKIR
R_IV	FoOHOrn	OHOrn	AEQARRAPEAIAVLFGEQRLSYGELDSQANRLAQRLVELGVGPEVRVAIAMRRSAEIMVAFLAVLKAGGAYVPLDIAYPAERLRYMLEDCGAALVLTQRDVLERLPLPAGLASLAVDDPGEWQDRPEGAPEVDLAEENLAYVIYTSGSTGLPKGVAVSHGPLVSHIRATGERYETSPADCELHFMSFAFDGAHEGWMHPLINGARVLVRDDSIWLPEETYAQMHRHGVTIGVFPPVYLQQLAEHAERDGNPPPVRVYCFGGDAVPQASYELAWESLRPDYLFNGYGPTETVVTPLLWKARPQDPCGAAYAPIGTLLGRRRAYVLGADLDLLPLGLAGELYLGGEGVARGYLDRPALTAERFVPDPYGNGERVYRSGDLTRARADGLVDYLGRVDHQVKIR
R_IV	Gly	Gly	FEAQAGRFADAPAVLFDGELLTYGELNRRANRLAHYLLAEGVGTESLVGIAMERGPDMLVGLLAVLKAGAAYVPLDPDYPRERLAYMLEDSGVRLVLSQSWLSPGLPLAKGVAALDLDRTGWLDGYPSNDPLRPLAAENLAYVIYTSGSTGRPKGVQIEHRSLLNFLASMAREPGCTSSDRLLQLTSLSFDIAGLELYLGLTRGACIVMPKAQQSKDPQALLALIEEAEVSIIQATPATWRMLLDGAPERAEVLRGRKALCGGEALGGGLARRLLAHVDSLWNVYGPTETTIWSSCQRVLDSEVIHLGGPIGNTALHVLDDELEPMPAGGGGELLIGGGGLARGYFARPALTAERFVPNPFDAHGGRLYRTGDLASRRSDGVIDYLGRVDHQVKIR
PAO1_Flu	Rsc	Rsc	SYRDLDLRARSIAAALQAHAQLGDRAVLLFPSGPDYVAAFFGCLYAGVIAVPAYPPESARRHHQERLLSIIADAEPRLVLTTADLREPLLQMNAQLSAANAPQLLCVDQLDPAVAEAWDEPQVRPEHIAFLQYTSGSTALPKGVQVSHGNLVANEVLIRRGFGIGADDVIVSWLPLYHDMGLIGGLLQPIFSGVPCVLMSPRYFLERPVRWLEAISQYGGTVSGGPDFAYRLCSERVAESALQRLDLSGWRVAFSGSEPIRQDSLERFAEKFAASRFDASSFFACYGLAEATLFVTGGQRGQGIPALAVDGEALARNRIAEGEGSVLMCCGRSQPEHAVLIVDAASGEVLGDDNVGEIWAAGPSIAHGYWRNPEASAKAFVERDGRTWLRTGDLGFLRD…
PAO1_Flu	Glu	Glu	LERQLAQSAERVALEWDGGSLGYAELHARANRLAHYLRDKGVGPDVRVAICAERSPQLLVGLLAIVKAGGAYVPLDPDYPSERLAYMLADSGVELLLTQAHLFERLPGAEGVTPICLDSLKLDNWPSQAPGLHLHGDNLAYVIYTSGSTGQPKGVGNTHAALAERLQWMQATYTLDGDDVLMQKAPVSFDVSVWECFWPLVTGCRLVLAAPGEHRDPARLVELVRQFGVTTLHFVPPLLQLFIDEPGVAACGSLRRLFSGGEALPAELRNRVLQRLPAVALHNRYGPTETAINVTHWQCRAEDGERSPIGRPLGNVVCRVLDAEFNLLPAGVAGELCIGGLGLARGYLGRPALSAERFVADPFSAAGERLYRTGDRARWNADGVLEYLGRLDQQVKLR
PAO1_Flu	Tyr	Tyr	FAARVAASPQAPALTFAGQTLSYAELDARSNRLARVLRSHGVGPEVRVGLALERSLEMVVGLLAILKAGGAYVPLDPEYPLERLQYMIEDSGVRLLLSHAALFEALGELPAGVARWCLEEDGPALDAEDPAPLAALSGPQHQAYLIYTSGSTGKPKGVAVSHGEIAMHCAAVIECFGMRAEDCELHFYSINFDAASERLLAPLLCGARVVLRAQGQWGAEEICELIRAEGVSILGFTPSYGSQLAQWLESQGRQLPVRMCITGGEALTGEHLQRIRQAFAPASFFNAYGPTETVVMPLACLAPERLEEGAASVPIGSVVGARVAYILDADLALVPQGATGELYVGGAGLARGYHERPALSAERFVPDPFAAEGGRLYRTGDLVRLCDNGQVEYVGRIDH…
PAO1_Flu	Dab	Dab	FEAQVAAHPQRIAASCLEQRWSYAELNRRANRLGHALRAAGVGIDQPVALLAERGLDLLGMIVGSFKAGAGYLPLDPGHPTQRLTRIVELSRTLVLVCTQACREQALALFDELGCVDRPRLLVWDEIQQGEGAEHDPQVYSGPQNLAYVIYTSGSTGLPKGVMVEQAGMLNNQLSKVPYLELDENDVIAQTASQSFDISVWQFLAAPLFGARVAIVPNAVAHDPQGLLAHVGEQGITVLESVPSLIQGMLAEERQALDGLRWMLPTGEAMPPELARQWLKRYPRIGLVNAYGPAECSDDVAFFRVDLASTESTYLPIGSPTDNNRLYLLGAGADDAFELVPLGAVGELCVAGTGVGRGYVGDPLRTAQAFVPHPFGAPGERLYRTGDLARRRADGVLEY…
