# Supplementary material for: Feature sequence-based genome mining uncovers the hidden diversity of bacterial siderophore pathways
Source: eLife. 2024 Oct 1;13:RP96719. doi: 10.7554/eLife.96719 (PMC11444679; doi:10.7554/eLife.96719)
Supplement: Supplementary file 4. [file elife-96719-supp4.xlsx]

## Sheet: Sheet1
BGC_idx	BGC_type	spname	product	domain_id	substrate	short	aaseq	dnaseq	structure	evidences	publications
BGC0000305	NRP	Pseudomonas sp. MIS38	arthrofactin A	nrpspksdomains_arfA_AMP-binding.1	leucine	leu	EAQATLRPQSLAAVDQGQSLTYAELNQRANALAHHLLDLGVRPDDRVAIVARRGLDTLVGLLAILKAGAAYVPLDPAHPAERLSYLLEDSAPIAVLTQRALRGHLPALSVPVIELDQPSWSAGRVDAPKVPGLTPANLAYVIYTSGSTGLPKGVMVEHRTLCNLVDWHADVFDLHAGSHTSSLAGFGFDAMAWEVWPALCVGATLHLAPASEGSEDIDALLDWWRAQPLDVSFLPTPIAEYAFSRQLDHPTLRTLLIGGDRLRQFPRQPSFEVINNYGPTEATVVATSGRIDAGQALHIGKPVSNATVYLLDEQQQPVPLGVTGELYVGGAGVARGYLNRAELSAERFLRDPFSAEPGARLYRTGDLARWRADGNLEYLGRNDDQVKIR	GAAGCGCAGGCGACGCTACGGCCGCAGTCGCTGGCGGCGGTTGATCAGGGGCAAAGCCTGACCTATGCCGAACTCAATCAACGCGCCAACGCGCTGGCTCATCATCTGCTCGATCTCGGGGTGCGCCCGGATGACCGGGTGGCGATCGTTGCCCGGCGCGGGCTCGACACGCTGGTCGGGCTGTTGGCGATCCTCAAGGCTGGCGCCGCGTATGTACCGCTGGATCCGGCGCATCCAGCCGAGCGCCTGAGCTATCTGCTGGAGGACAGCGCGCCCATCGCGGTGCTGACCCAGCGCGCGCTGCGCGGGCATTTGCCGGCGTTGTCGGTGCCGGTGATCGAGCTGGATCAGCCGAGTTGGTCGGCTGGCCGGGTCGACGCGCCGAAGGTGCCGGGGCTG…	CCCCCCC[C@H](O)CC(N[C@@H](C(N[C@@H](C(N[C@H]([C@H](OC([C@@H](NC([C@@H](NC([C@@H](NC([C@@H](CO)NC(C(CC(C)C)N1)=O)=O)[C@@H](C)CC)=O)[C@@H](C)CC)=O)CC(O)=O)=O)C)C(N[C@@H](C(N[C@H](CC(C)C)C(N[C@H](CO)C1=O)=O)=O)CC(C)C)=O)=O)CC(O)=O)=O)CC(C)C)=O	['Structure-based inference']	['pubmed:23169772', 'pubmed:20460722', 'pubmed:14522057']
BGC0000305	NRP	Pseudomonas sp. MIS38	arthrofactin A	nrpspksdomains_arfA_AMP-binding.2	aspartic acid	asp	FEAQVRRKPDAIALQSAQGTLTYLELNQRANRLAHHLRELGVQPDSRVAICVERGLDLIVGLLGILKAGGAYVPLDPDYPLERLNYMLQNSAPVALLVHGATRQLLGEPSVPLINLDHGSWEQQPSGNPQVPGLNASNLAYMIYTSGSTGLPKGVMIEHRSACNMVHWGSQLSPPTGHGALLQKAPFSFDSSVWEIFWPLCSGMRLVLARPDGNRDSAYVVQTIREHQVTVVKFVPALLQQFIEQDGVEQCTSLTDVLNGGGELSAALARQVRDRLPWVRLHNVYGPTETTVDSTGWTLDPEMPVPDNVVPIGTALSNTRLYVLDAYGQPVPQGVSGELHIGGVGVARGYHGLPEMQAERFIDSPFVPGDRLYRTGDLARYNHHGELEFLGRNDFQIKLR	TTCGAAGCACAGGTGCGGCGTAAGCCGGACGCCATCGCGCTGCAATCCGCGCAGGGAACCCTGACTTACCTTGAGCTCAATCAGCGCGCCAATCGTCTGGCCCATCACCTGCGTGAACTCGGCGTGCAACCGGACTCGCGCGTAGCAATCTGCGTCGAGCGCGGACTGGATCTGATCGTTGGTTTGCTCGGCATCCTCAAGGCCGGTGGTGCTTATGTGCCGCTGGACCCGGACTATCCGCTGGAGCGCCTGAATTACATGTTGCAGAACAGCGCGCCGGTCGCACTGCTGGTGCATGGCGCCACGCGGCAATTGCTCGGCGAACCGAGTGTGCCGCTGATCAATCTGGATCACGGCAGTTGGGAGCAGCAGCCGTCAGGAAATCCGCAGGTGCCTGGC…	CCCCCCC[C@H](O)CC(N[C@@H](C(N[C@@H](C(N[C@H]([C@H](OC([C@@H](NC([C@@H](NC([C@@H](NC([C@@H](CO)NC(C(CC(C)C)N1)=O)=O)[C@@H](C)CC)=O)[C@@H](C)CC)=O)CC(O)=O)=O)C)C(N[C@@H](C(N[C@H](CC(C)C)C(N[C@H](CO)C1=O)=O)=O)CC(C)C)=O)=O)CC(O)=O)=O)CC(C)C)=O	['Structure-based inference']	['pubmed:23169772', 'pubmed:20460722', 'pubmed:14522057']
BGC0000305	NRP	Pseudomonas sp. MIS38	arthrofactin A	nrpspksdomains_arfB_AMP-binding.1	threonine	thr	FEAHAAARPEAAALLFEEQTLSYGELNRRANQLAHHLLARGIRPDQRVAICVERGPQMIIGLLGILKAGAGYVPIDPAYPLERIAYTLEDSAPVAVLTQADTLDRVGALGVPIIDLDSLQLQAELSSNPQIPELTPNHLAYVIYTSGSTGLPKGVMVEHRNVVRLFSATHDWFNFNPQDVWALFHSFAFDFSVWEIWGALAFGGQLLLVPQAVSRSPDDCYALLCRTGVTVLNQTPSAFRQLIAAQGRSPLQHSLREVIFGGEALEPGLLKPWYARVGNAGTRLVNMYGITETTVHVTYRPLQAADALLVGRSPIGVGIPDLQLYVLDAQHEPVPAGVIGELYVGGAGVARGYLNREALTAERFIADPFSGRAEARLYKTGDLARWTADGSLEYLGRND…	TTCGAAGCCCACGCGGCGGCACGCCCGGAGGCCGCAGCGCTGCTGTTCGAAGAGCAGACGCTGAGCTACGGCGAGCTCAACCGCCGCGCCAATCAGCTCGCGCATCACCTGCTGGCGCGGGGGATTCGTCCGGATCAGCGCGTGGCGATCTGCGTCGAGCGCGGCCCGCAGATGATCATCGGCCTGCTAGGTATCCTCAAGGCCGGCGCCGGTTACGTGCCGATCGACCCGGCCTATCCACTGGAGCGCATCGCTTACACCCTGGAGGACAGCGCCCCGGTGGCGGTGCTGACCCAGGCCGATACGCTGGATCGGGTTGGCGCGCTTGGCGTGCCGATCATCGATCTGGACAGCCTGCAGTTGCAGGCTGAACTCAGCAGCAATCCGCAGATTCCCGAG…	CCCCCCC[C@H](O)CC(N[C@@H](C(N[C@@H](C(N[C@H]([C@H](OC([C@@H](NC([C@@H](NC([C@@H](NC([C@@H](CO)NC(C(CC(C)C)N1)=O)=O)[C@@H](C)CC)=O)[C@@H](C)CC)=O)CC(O)=O)=O)C)C(N[C@@H](C(N[C@H](CC(C)C)C(N[C@H](CO)C1=O)=O)=O)CC(C)C)=O)=O)CC(O)=O)=O)CC(C)C)=O	['Structure-based inference']	['pubmed:23169772', 'pubmed:20460722', 'pubmed:14522057']
BGC0000305	NRP	Pseudomonas sp. MIS38	arthrofactin A	nrpspksdomains_arfB_AMP-binding.2	leucine	leu	EARAAAHPEALAAVQGAQQLSYGELNQRANRLAHHLIGLGVQPDDRVALCARRSPDMLVALLAILKAGAGYVPVDPAYPAERIAYLLQDCAPVAVVAQASTRDLLGGVQVIDLDNDLWQHLSDANPQVPALTPKHLAYVIYTSGSTGQPKGVMVEHATLENLVHWHAEAFDLQAGSQTASVAGFGFDAMAWEVWPALCVGATLHLPPPSIRNEHLDEMLDWWCAQPLQVSFLPTPVAEYAFSRQLQHPTLRTLLIGGDRLRQFSRQQTFEVINNYGPTEATVVATSGPVELDQPLHIGRPIANVRIYVLDAEQRPVPVGVAGELYVGGAGVARGYLNRPELSAAQFLFDPFSDEPQARMYRTGDQARWLADGNIEYLGRNDDQVKLR	GAGGCCCGGGCGGCCGCGCACCCCGAGGCATTGGCGGCGGTGCAAGGCGCGCAGCAGTTGAGCTATGGCGAACTCAATCAGCGGGCCAATCGCCTGGCACATCACCTGATTGGCCTTGGCGTGCAGCCCGATGACCGGGTCGCCCTATGTGCCCGGCGCAGCCCGGACATGCTGGTGGCGCTGCTGGCGATCCTCAAGGCCGGCGCCGGTTATGTGCCGGTCGATCCGGCGTATCCGGCGGAACGCATCGCCTACCTGTTGCAGGACTGCGCCCCGGTGGCGGTGGTGGCGCAGGCATCGACTCGCGATCTGCTCGGTGGCGTGCAGGTCATTGATCTGGACAACGACCTCTGGCAGCACCTGTCGGATGCCAATCCGCAGGTGCCGGCATTGACGCCG…	CCCCCCC[C@H](O)CC(N[C@@H](C(N[C@@H](C(N[C@H]([C@H](OC([C@@H](NC([C@@H](NC([C@@H](NC([C@@H](CO)NC(C(CC(C)C)N1)=O)=O)[C@@H](C)CC)=O)[C@@H](C)CC)=O)CC(O)=O)=O)C)C(N[C@@H](C(N[C@H](CC(C)C)C(N[C@H](CO)C1=O)=O)=O)CC(C)C)=O)=O)CC(O)=O)=O)CC(C)C)=O	['Structure-based inference']	['pubmed:23169772', 'pubmed:20460722', 'pubmed:14522057']
BGC0000305	NRP	Pseudomonas sp. MIS38	arthrofactin A	nrpspksdomains_arfB_AMP-binding.3	leucine	leu	QVQAEQQPQALAVVQGTQQLTYAQLNQQANRLAHHLLGLGVQPDDRIAVCLQRSPQMLVALLAILKAGAGYVPIDPAYPAERIAYLLQDSDPVAVLAQGATRELLGRVPVIDLDNALWQHLPETNPQLPTLTPAHLAYVIYTSGSTGQPKGVVVEHATLENLVHWHCEAFDLRAGSHTASVAGCGFDAMAWEVWPALCVGATLHLPPPSISNEHLDELLDWWRAQPLQVSFLPTPIAEYAFSRELGHPTLRTLLIGGDKLRQFSRGQTFDVINNYGPTEATVVATSGSIHAGQLLHIGRPISNARIYLLDEQQRPVPVGVAGELYVGGAGVARGYLNRPELTAERFLEDPFSDRPQARMYRTGDLARWLADGNIEYLGRNDDQVKLR	CAAGTGCAGGCCGAGCAGCAGCCGCAGGCACTGGCAGTGGTGCAGGGCACGCAGCAACTGACCTATGCGCAACTCAATCAGCAGGCCAATCGCCTGGCGCATCACTTGCTCGGCCTCGGCGTGCAGCCGGACGACCGGATTGCCGTGTGCCTGCAACGCAGCCCGCAGATGCTGGTGGCGCTGCTGGCGATTCTCAAGGCCGGCGCCGGTTACGTGCCAATCGACCCGGCGTACCCGGCGGAGCGCATCGCCTACCTGTTGCAGGACAGCGATCCGGTGGCGGTGCTGGCGCAGGGCGCGACCCGCGAGCTGCTGGGTCGAGTGCCGGTGATCGATCTGGACAACGCCCTCTGGCAACACCTGCCGGAGACCAATCCGCAACTGCCGACGCTGACCCCG…	CCCCCCC[C@H](O)CC(N[C@@H](C(N[C@@H](C(N[C@H]([C@H](OC([C@@H](NC([C@@H](NC([C@@H](NC([C@@H](CO)NC(C(CC(C)C)N1)=O)=O)[C@@H](C)CC)=O)[C@@H](C)CC)=O)CC(O)=O)=O)C)C(N[C@@H](C(N[C@H](CC(C)C)C(N[C@H](CO)C1=O)=O)=O)CC(C)C)=O)=O)CC(O)=O)=O)CC(C)C)=O	['Structure-based inference']	['pubmed:23169772', 'pubmed:20460722', 'pubmed:14522057']
BGC0000305	NRP	Pseudomonas sp. MIS38	arthrofactin A	nrpspksdomains_arfB_AMP-binding.4	serine	ser	FEAQVERSPQAPVVVAGEQQLSYAELNARANQLARHLRELGVGPDSRVALCVERGLDMVVGLLAILKAGGGYVPLDPAYPLERLAYMLKDSAPLAVLVQGTTRSLLGEVSVPVVDLDQPHWQSLPADNLSVAELTPQHTAYVIYTSGSTGQPKGVINEHSGVVNRLLWMQDAYQLTSSDTVLQKTPFSFDVSVWEFFWPLMTGARLVMARPEGHKDPQYLSEIIEREQITTLHFVPSMLDVFLAHADTARCSSLRQVMCSGEALPGSVVRRFKQQLPASQLHNLYGPTEAAVDVTAWNCAGPLEQTPDNTPIGKPIANTRMYILDAQQQPVPHGVVGELYIGGVQVARGYLNRPELNAERFLNDPFQANGRMYRTGDVARYLPDGNIEYLGRNDDQVKIR	TTCGAAGCGCAAGTGGAGCGCTCGCCACAGGCACCCGTCGTGGTCGCGGGTGAGCAGCAACTGAGCTACGCCGAACTCAATGCCCGGGCCAATCAACTGGCGCGGCACCTGCGCGAATTGGGCGTAGGGCCGGACTCACGGGTGGCGCTCTGCGTCGAGCGCGGTCTGGACATGGTGGTCGGGCTGCTGGCGATCCTCAAGGCTGGCGGCGGTTATGTGCCGCTGGACCCGGCGTATCCGCTGGAGCGTCTGGCCTACATGCTGAAAGACAGCGCGCCGTTGGCGGTGCTGGTGCAGGGAACCACGCGTTCGTTACTCGGCGAAGTCTCAGTGCCGGTGGTCGATCTGGATCAGCCGCACTGGCAATCGCTGCCTGCCGACAACCTTTCAGTAGCCGAA…	CCCCCCC[C@H](O)CC(N[C@@H](C(N[C@@H](C(N[C@H]([C@H](OC([C@@H](NC([C@@H](NC([C@@H](NC([C@@H](CO)NC(C(CC(C)C)N1)=O)=O)[C@@H](C)CC)=O)[C@@H](C)CC)=O)CC(O)=O)=O)C)C(N[C@@H](C(N[C@H](CC(C)C)C(N[C@H](CO)C1=O)=O)=O)CC(C)C)=O)=O)CC(O)=O)=O)CC(C)C)=O	['Structure-based inference']	['pubmed:23169772', 'pubmed:20460722', 'pubmed:14522057']
BGC0000305	NRP	Pseudomonas sp. MIS38	arthrofactin A	nrpspksdomains_arfC_AMP-binding.1	leucine	leu	FEAQVAERPDALAAVFADAQLTYAELNQQANALAQHLIGLGVKPDDRVAIVARRGLDTLVGLVAILKAGAGYVPIDPAHPAERLNYLLDDSAPVAVLTQSHLRERLPALNVPVLDLDHCNWPLTVTQNPQVPGLSTANLAYVIYTSGSTGLPKGVMVEHHTLSNLVDWHCTAFDLCAGRHTSSLAGFGFDAMAWEVWPALCAGATLHLAPTHEGGEDIDALLAWWCAQPLDVSFLPTPVAEYAFSQNLEHPTLRTLLIGGDRLRQFNRNQHFDVINNYGPTEATVVATSGLVQSGDALHIGKPLSNATVYLLDEQQRPVPLGVAGELYVGGAGVARGYLNRPDMTAERFLRDPFSRAPNARMYRTGDLARWREDGNIEYLGRNDDQVKIR	TTCGAGGCACAGGTGGCCGAACGGCCGGACGCGCTGGCGGCAGTGTTTGCCGACGCGCAACTGACCTACGCCGAACTCAATCAGCAAGCCAATGCCTTGGCGCAGCATCTGATCGGTTTGGGCGTGAAACCCGACGACCGTGTCGCCATCGTCGCCCGTCGCGGGCTGGACACCCTGGTCGGGCTGGTGGCGATCCTCAAGGCCGGCGCCGGTTACGTGCCGATTGACCCGGCGCACCCGGCGGAGCGATTGAACTACCTGCTCGACGACAGCGCGCCAGTCGCCGTACTGACCCAAAGTCATCTGCGCGAGCGACTGCCGGCGCTAAACGTGCCGGTGCTCGACCTCGATCACTGCAACTGGCCGCTGACGGTTACGCAAAACCCGCAGGTACCGGGC…	CCCCCCC[C@H](O)CC(N[C@@H](C(N[C@@H](C(N[C@H]([C@H](OC([C@@H](NC([C@@H](NC([C@@H](NC([C@@H](CO)NC(C(CC(C)C)N1)=O)=O)[C@@H](C)CC)=O)[C@@H](C)CC)=O)CC(O)=O)=O)C)C(N[C@@H](C(N[C@H](CC(C)C)C(N[C@H](CO)C1=O)=O)=O)CC(C)C)=O)=O)CC(O)=O)=O)CC(C)C)=O	['Structure-based inference']	['pubmed:23169772', 'pubmed:20460722', 'pubmed:14522057']
BGC0000305	NRP	Pseudomonas sp. MIS38	arthrofactin A	nrpspksdomains_arfC_AMP-binding.2	serine	ser	FEAQVARTPWAPAVVADEQQLTYAELNARANQLARHLRELGVGPDSRVAICVERGLDMVVGLLAILKAGGGYVPLDPAYPLERLAYMLKDSAPLAVLVQGTTRSLLGEVSVPVIDLDQSQWQSLPADNLSVAELTPQHTAYVIYTSGSTGQPKGVINEHSGVVNRLLWMQDAYQLTSSDTVLQKTPFSFDVSVWEFFWSLMTGARLVMARPEGHKDPLYLSEIIEREHITTLHFVPSMLDVFLAHADTARCASLRQVMCSGEALPGSVVRRFKQQLPGSQLHNLYGPTEAAVDVTAWNCAGPLESTPDNTPIGKPIANTRMYILDAQQQPVPHGVVGELYIGGVQVARGYLNRPELNAERFLNDPFQSNGRMYRTGDVARYLPDGNIEYLGRNDDQVKIR	TTCGAAGCGCAAGTGGCGCGTACGCCTTGGGCTCCCGCGGTGGTTGCTGATGAACAGCAACTGACTTATGCCGAGCTCAATGCCCGGGCCAATCAACTGGCGCGGCACCTGCGTGAATTGGGCGTAGGGCCGGATTCGCGGGTGGCGATCTGCGTCGAACGCGGTCTGGACATGGTGGTCGGGCTGCTGGCGATCCTCAAGGCTGGCGGCGGTTATGTGCCGCTGGATCCGGCGTATCCGCTGGAGCGTCTGGCTTACATGCTGAAAGACAGCGCGCCGTTGGCGGTATTGGTGCAGGGAACCACGCGTTCGTTGCTCGGTGAAGTCTCAGTGCCGGTGATCGATCTGGATCAGTCGCAATGGCAATCGCTGCCTGCCGACAACCTTTCAGTAGCCGAA…	CCCCCCC[C@H](O)CC(N[C@@H](C(N[C@@H](C(N[C@H]([C@H](OC([C@@H](NC([C@@H](NC([C@@H](NC([C@@H](CO)NC(C(CC(C)C)N1)=O)=O)[C@@H](C)CC)=O)[C@@H](C)CC)=O)CC(O)=O)=O)C)C(N[C@@H](C(N[C@H](CC(C)C)C(N[C@H](CO)C1=O)=O)=O)CC(C)C)=O)=O)CC(O)=O)=O)CC(C)C)=O	['Structure-based inference']	['pubmed:23169772', 'pubmed:20460722', 'pubmed:14522057']
BGC0000305	NRP	Pseudomonas sp. MIS38	arthrofactin A	nrpspksdomains_arfC_AMP-binding.3	isoleucine	ile	FERQVAADPHAIAVVHGGQTSSYGDLNDRANRLAHYLIAQGVQPGAQVAILLPRSRELLVAQLAIAKCAAAYVPLDINAPSERQAFMLEDSRAVALLTLSSEAIDYAAPRIDLDRLKLSGQSTHNPNLAQSSDALAYIMYTSGSTGTPKGVMVPHRGIARLVLNNGYADFNRQDRVAFASNPAFDASTMDIWGPLLNGGRVVVIDHQTLLDPNAFGRELSASGATILFVTTALFNQYVQLIPQALKGLRMVLCGGERGDPTSFRRLRAEAPQLRIVHCYGPTETTTYATTFEVHEVAENAESVPIGAPISNTQVYVLDAHQQPVPMGVTGELYIGGQGVALGYLNRADLTAEKFLPDPFSDRPGALLYRTGDLVRWLAPGQLDCIGRNDDQVKIR	TTCGAAAGGCAAGTGGCGGCAGATCCACACGCCATCGCTGTGGTGCATGGCGGGCAAACGTCGAGTTATGGCGATTTGAATGATCGGGCCAACCGCTTGGCCCACTACCTGATCGCTCAAGGCGTACAGCCGGGCGCTCAGGTGGCGATCCTGCTGCCGCGCTCGCGGGAGCTGTTGGTCGCGCAGCTGGCGATTGCCAAGTGTGCGGCGGCTTATGTGCCGCTGGACATCAACGCGCCGAGCGAGCGCCAGGCGTTCATGCTTGAGGACAGCCGCGCCGTGGCGTTGCTGACACTCAGCAGCGAAGCCATCGACTACGCCGCGCCGCGCATCGACCTCGACCGGCTCAAGCTCAGCGGTCAGTCGACGCACAATCCGAATCTGGCGCAAAGCTCGGAC…	CCCCCCC[C@H](O)CC(N[C@@H](C(N[C@@H](C(N[C@H]([C@H](OC([C@@H](NC([C@@H](NC([C@@H](NC([C@@H](CO)NC(C(CC(C)C)N1)=O)=O)[C@@H](C)CC)=O)[C@@H](C)CC)=O)CC(O)=O)=O)C)C(N[C@@H](C(N[C@H](CC(C)C)C(N[C@H](CO)C1=O)=O)=O)CC(C)C)=O)=O)CC(O)=O)=O)CC(C)C)=O	['Structure-based inference']	['pubmed:23169772', 'pubmed:20460722', 'pubmed:14522057']
BGC0000305	NRP	Pseudomonas sp. MIS38	arthrofactin A	nrpspksdomains_arfC_AMP-binding.4	isoleucine	ile	FQQQAAAHPKAVAAVHGEHSLSYFELNAQANRLAHHLISQGVQPGDHVAILLPRSLELLVAQLAIAKCAAAYVPLDINAPSERQAFMVEDCQAAALLTLSREDIDYAAPRIDLDRLILSGQPTHNPNLLQSSEALAYIMYTSGSTGTPKGVMVPHRAIGRLVLNNGYADFNAQDRVVFASNPAFDASTMDIWGPLLNGGRVVVIDHQTLLDPNAFGHELSASRATVLFVTTALFNQYVQLIPQALKGLRILLCGGERGDPAAFRRLLAEAPKLRIVHCYGPTETTTYATTFEVREVAENAESVPIGGPISNTQVYVLDAHQQPVPMGVTGELYIGGQGVALGYLNRADLTAEKFLRDPFSDQPGALLYRTGDLARWLAPGQLDCIGRNDDQVKIR	TTCCAGCAACAGGCAGCGGCGCATCCCAAAGCGGTGGCGGCGGTGCATGGCGAGCATTCGCTGAGCTACTTTGAGCTGAACGCCCAGGCCAACCGTCTGGCGCATCACTTGATCAGCCAGGGCGTGCAGCCGGGCGATCACGTGGCGATCCTGTTGCCGCGTTCGCTGGAACTGCTGGTGGCGCAACTGGCGATTGCCAAATGCGCGGCGGCGTATGTGCCGCTGGACATCAATGCCCCGAGCGAGCGTCAGGCATTCATGGTCGAGGACTGTCAGGCCGCGGCATTGCTGACCCTCAGCCGTGAAGACATCGACTACGCTGCGCCACGTATTGACCTTGACCGCTTGATCCTCAGCGGCCAACCGACGCACAACCCGAACCTGCTGCAATCCTCGGAA…	CCCCCCC[C@H](O)CC(N[C@@H](C(N[C@@H](C(N[C@H]([C@H](OC([C@@H](NC([C@@H](NC([C@@H](NC([C@@H](CO)NC(C(CC(C)C)N1)=O)=O)[C@@H](C)CC)=O)[C@@H](C)CC)=O)CC(O)=O)=O)C)C(N[C@@H](C(N[C@H](CC(C)C)C(N[C@H](CO)C1=O)=O)=O)CC(C)C)=O)=O)CC(O)=O)=O)CC(C)C)=O	['Structure-based inference']	['pubmed:23169772', 'pubmed:20460722', 'pubmed:14522057']
BGC0000305	NRP	Pseudomonas sp. MIS38	arthrofactin A	nrpspksdomains_arfC_AMP-binding.5	aspartic acid	asp	FEAQVRRKPDAVALQSAQGNLTYRELNQRANRLAQHLRELGVQPDARVAICVERGLDLVVGLLGILKAGGAYVPLDPGYPVERLAYMLKDSAPTAVLVQTATRGLFDDAVATVIDLDRSTWQHLPDHDSSVPGLSASNLAYMIYTSGSTGLPKGVMIEHRSACNMVHWGSQISPPTEHGALLQKAPFSFDSSVWEIFWPLCSGMRLVLARPNGNRDSAYVVQTIREQQVTVVKFVPALLQQFIEQDGVEQCTSLTDVLNGGGELSAVLARQVRDRLPWVRLHNVYGPTETTVDSTGWTLEPHMPVPDNVVPIGTALSNTRLYVLDAYGQPVPQGVSGELHIGGVGVARGYHGLPEMQAERFIDSPFVAGDRLYRTGDLARYNNHGELEFLGRNDFQIKLR	TTCGAAGCGCAGGTGCGGCGCAAACCGGACGCTGTCGCGCTGCAGTCCGCGCAAGGCAACCTGACCTACCGCGAGCTCAATCAGCGCGCCAACCGCTTGGCCCAGCACCTGCGCGAACTCGGTGTGCAGCCGGATGCGCGGGTGGCGATCTGCGTCGAGCGCGGGTTGGATCTGGTGGTCGGTCTGCTCGGCATCCTCAAGGCCGGTGGTGCCTATGTGCCGCTGGACCCGGGGTATCCGGTGGAGCGTCTGGCCTACATGCTCAAGGACAGCGCGCCGACTGCGGTGCTGGTGCAGACCGCTACTCGCGGGTTGTTCGATGACGCGGTCGCCACGGTGATCGACCTTGACCGCAGTACCTGGCAGCACCTGCCGGATCACGATTCGTCAGTGCCGGGC…	CCCCCCC[C@H](O)CC(N[C@@H](C(N[C@@H](C(N[C@H]([C@H](OC([C@@H](NC([C@@H](NC([C@@H](NC([C@@H](CO)NC(C(CC(C)C)N1)=O)=O)[C@@H](C)CC)=O)[C@@H](C)CC)=O)CC(O)=O)=O)C)C(N[C@@H](C(N[C@H](CC(C)C)C(N[C@H](CO)C1=O)=O)=O)CC(C)C)=O)=O)CC(O)=O)=O)CC(C)C)=O	['Structure-based inference']	['pubmed:23169772', 'pubmed:20460722', 'pubmed:14522057']
BGC0000323	NRP	Pseudomonas cichorii	cichofactin A	nrpspksdomains_AHZ34232.1_AMP-binding.1	leucine	leu	ENQAQTRPDAVAAVHQGKHLTYAQLNRKANGLAQRLIELGVRPDDRVALVARRGLETLVGMLAVLKAGAAYVPVDPAHPRERLSYLLSDSQPVAVLTQSNLHDRLPELSLPLIDLDGSDWGQGAHANPRIASLSSDNLVYVIYTSGSTGQPKGVMVEHRTLSHLVDWHCEAFSLGAGGHASSLAGFGFDAMAWEVWPTLCSGATLHVAPTQEGGEDIDALLQWWRAQPLDVSFLPTPVAEYAFSQEEDHPTLRTLLIGGDRLRQLNRDPGFAVINNYGPTETTVVATSGQVLVGGALHIGGPIANTRTYVLDARLQPVPVGVTGELYIGGAGVARGYLNRPDLTEERFLADPFSGVAHARMYRSGDLVRWNSDGTLDYQGRNDDQVKIR	GAAAATCAGGCTCAGACTCGCCCGGATGCCGTTGCGGCGGTCCATCAGGGAAAACACCTGACCTACGCCCAGCTCAACCGCAAGGCCAATGGCCTGGCCCAGCGCCTGATCGAACTGGGCGTGCGCCCGGATGATCGTGTTGCGCTGGTTGCCCGTCGTGGCCTGGAAACCCTGGTGGGCATGCTGGCAGTGCTCAAGGCCGGTGCGGCCTATGTGCCGGTTGACCCTGCGCATCCGCGTGAGCGCCTGTCCTACCTGTTGAGCGACAGCCAGCCGGTGGCGGTGCTGACCCAGTCGAATCTGCATGACCGTCTGCCAGAACTGAGCCTGCCGCTGATCGATCTGGACGGTAGCGACTGGGGGCAGGGTGCTCACGCTAACCCGCGGATCGCCAGCCTG…	O=C(N[C@@H](CC(C)C)C(N[C@@H](CC(C)C)C(N[C@@H](CCC(N)=O)C(N[C@@H](CC(C)C)C(N[C@@H](CCC(N)=O)C(N[C@@H](C(C)C)C(N[C@@H](CC(C)C)C(N[C@@H](CC(C)C)C(O)=O)=O)=O)=O)=O)=O)=O)=O)[C@H](CC1=CNC=N1)NC(CC(O)CCCCCCC)=O	['Sequence-based prediction']	['pubmed:23405865']
BGC0000323	NRP	Pseudomonas cichorii	cichofactin A	nrpspksdomains_AHZ34232.1_AMP-binding.2	leucine	leu	EAQAFNRPDAPAVVQGDEVLSYAELNRRANGLAHHLIGLGVKPDERVALCLRRSPDRLVGLLAILKAGAAYVPVDPAYPADRISYLLEDSAPRVVLVDASTRDLVGDVAQVDLGQGAWDQEFRSNPQVAGLSHENLAYVIYTSGSTGQPKGVMVEHRTLNNLVHWHCQAFNLSAGSHTASVAGFGFDAMVWEIWPALCVGAVLHLPPAHVGNEHVDELLDWWLEQPLQVGFLPTPVAEQAFRRPQQHQTLRTLLIGGDRLRQFDRDPGFAVINNYGPTETTVVATSGQVRVGESLHIGGPISNTSIYVLDEQLQPVPVGVSGELYIGGSGVARGYLNRPDLTEERFIADPFSDVAHARMYRSGDLVRWNANGTLDYLGRNDDQVKIR	GAGGCCCAGGCCTTCAACAGGCCGGACGCGCCTGCCGTGGTGCAGGGCGATGAAGTCTTGAGCTACGCCGAACTCAACCGCCGCGCCAACGGCCTGGCCCATCATCTGATCGGGCTTGGCGTGAAGCCGGACGAGCGGGTCGCCCTGTGCCTGCGCCGCAGCCCCGACCGTCTGGTCGGCCTGCTGGCGATTCTCAAGGCCGGTGCCGCCTATGTGCCGGTTGATCCGGCTTACCCTGCCGATCGCATCAGCTACCTGCTGGAAGACAGCGCGCCGCGAGTGGTATTGGTGGATGCTTCGACCCGGGATCTGGTCGGTGATGTGGCGCAAGTGGATCTGGGCCAGGGCGCCTGGGATCAGGAGTTCCGCAGCAACCCGCAAGTGGCGGGCCTGAGCCAC…	O=C(N[C@@H](CC(C)C)C(N[C@@H](CC(C)C)C(N[C@@H](CCC(N)=O)C(N[C@@H](CC(C)C)C(N[C@@H](CCC(N)=O)C(N[C@@H](C(C)C)C(N[C@@H](CC(C)C)C(N[C@@H](CC(C)C)C(O)=O)=O)=O)=O)=O)=O)=O)=O)[C@H](CC1=CNC=N1)NC(CC(O)CCCCCCC)=O	['Sequence-based prediction']	['pubmed:23405865']
BGC0000323	NRP	Pseudomonas cichorii	cichofactin A	nrpspksdomains_AHZ34232.1_AMP-binding.3	glutamine	gln	FESQAARKPQAVALRGEGVQLSYQALNEQANRLAHHLIGLGVKTDDRVAICVERGVSMVVGLLAILKTGAAYVPLDPSYPRERIHYMLEDSAPAVVLVQTATRKLLDEERTLRVDLDNNIWGAQSIDNPQIVGMNPDHLAYVIYTSGSTGTPKGVMVEHRSVGNLVHWSSQVIPLKPETALLHKTPISFDASVWELFWPLCAGLPLVLARPDGHRDPAYLMRLIRDQKASVVQFVPALLQQFLELEEISQCTSLTDIVCGGGELTIALAERVRQRLPWARLHNVYGPTETTVDSSAWTLEPHEPVPDSALPIGRPISNTRMYVLDEYDQLVPQGVIGQLHIGGSGVTRGYLNLPQFQAERFIDSPFVAGDRLYRTGDLVAQRADGNLDFLGRNDDQVKL	TTCGAGAGTCAGGCTGCCCGCAAACCACAGGCCGTGGCGCTGCGTGGCGAAGGCGTACAACTGAGCTATCAGGCCCTTAACGAACAGGCCAATCGCCTGGCCCATCACCTGATCGGTCTGGGTGTGAAAACCGATGATCGGGTCGCGATCTGTGTCGAACGTGGCGTGTCCATGGTGGTTGGTCTGCTGGCCATCCTCAAGACCGGTGCCGCCTATGTGCCGCTGGACCCGAGCTATCCGCGTGAACGCATTCACTACATGCTTGAAGACAGCGCGCCGGCCGTGGTGCTGGTCCAGACTGCCACCCGCAAGCTGCTGGACGAAGAGCGCACGTTGCGTGTCGACCTCGACAACAACATCTGGGGCGCCCAGAGCATCGACAATCCGCAAATCGTCGGC…	O=C(N[C@@H](CC(C)C)C(N[C@@H](CC(C)C)C(N[C@@H](CCC(N)=O)C(N[C@@H](CC(C)C)C(N[C@@H](CCC(N)=O)C(N[C@@H](C(C)C)C(N[C@@H](CC(C)C)C(N[C@@H](CC(C)C)C(O)=O)=O)=O)=O)=O)=O)=O)=O)[C@H](CC1=CNC=N1)NC(CC(O)CCCCCCC)=O	['Sequence-based prediction']	['pubmed:23405865']
BGC0000323	NRP	Pseudomonas cichorii	cichofactin A	nrpspksdomains_AHZ34233.1_AMP-binding.1	leucine	leu	ERQALDQPDAIASQVGDQHLSYSELNSKANALAHHLISLGVRPDDRVAVVARRGLETLVGLLAVLKAGAGYVPVDPAHPDERIAYLLSDSAPVAVLTQQALLAGLPPLSVPVIALDRQDWSDHQDNPLVHGLSAANLAYVIYTSGSTGQPKGVMVEHRTLSNLVHWHCEAFDLHAGSHTASVAGFGFDAMAWEVWPALCAGATLHVPPADVSNEQLDSLLDWWLAQPLQVSFLSTPVAEYAFSRDLRHPTLRTLLIGGDRLRQFHRDPGFAVINNYGPTEATVVATSGQLFPDGSLDIGKPIANTQVYLLDEHQQLVPFGVAGELYVAGDGVARGYLNRPEMTAERFLDDPFSEQPGARMYRTGDLARWNADGTLEYLGRNDDQVKIR	GAACGTCAGGCCCTCGACCAGCCGGACGCCATCGCCTCGCAAGTGGGCGATCAGCACCTGAGCTACAGCGAACTGAATAGCAAGGCCAATGCCTTGGCCCATCACCTGATCAGCCTGGGCGTGCGCCCGGATGATCGTGTGGCCGTGGTCGCTCGTCGTGGTCTGGAAACACTGGTCGGTTTGCTGGCCGTGCTCAAGGCGGGCGCGGGTTATGTGCCGGTGGACCCGGCTCATCCGGATGAGCGTATCGCTTATCTGTTGAGCGATAGCGCACCGGTGGCCGTATTGACTCAGCAAGCGTTGCTGGCCGGTCTGCCGCCATTGTCGGTGCCGGTGATTGCCTTGGATCGTCAGGATTGGTCCGATCATCAGGACAATCCACTGGTACACGGTCTGAGC…	O=C(N[C@@H](CC(C)C)C(N[C@@H](CC(C)C)C(N[C@@H](CCC(N)=O)C(N[C@@H](CC(C)C)C(N[C@@H](CCC(N)=O)C(N[C@@H](C(C)C)C(N[C@@H](CC(C)C)C(N[C@@H](CC(C)C)C(O)=O)=O)=O)=O)=O)=O)=O)=O)[C@H](CC1=CNC=N1)NC(CC(O)CCCCCCC)=O	[]	['pubmed:23405865']
BGC0000323	NRP	Pseudomonas cichorii	cichofactin A	nrpspksdomains_AHZ34233.1_AMP-binding.2	glutamine	gln	FEAQVASTPDAVALESEGVRLSYRQLNEAANRLAHHLIGQGVQADSRVAVCLERGPNLLIGLLAVLKAGGAYVPLDPGYPTERLAYMLADSGALTLLADAATQERFADNTLQLVNLDASTWAAQSAENPVVPGLNADHLAYVIYTSGSTGTPKGVMVEHRGLCNLVQWSSQLILPTPEGALLHKTPVSFDASVWELFWPLCAGLRLVLARPDGHRDPAYLAQLIIERQVSVVQFVPALLQQFLELEESSQCNSLTDIVCGGGELTEALARQVRQRMPGVRLHNVYGPTETTVDCSVWTLEPQDSVPDSALPIGRPISNTRLYVLDACDQPVPQGVVGQLHIGGAGVARGYLNLPHMQAERFIDSPFVAGDRLYRSGDLVRQRADGTLEFLGRNDFQVKL	TTCGAGGCTCAAGTCGCAAGTACACCGGATGCCGTGGCCCTGGAAAGCGAAGGCGTTCGTCTGAGCTATCGCCAGCTCAACGAGGCCGCCAACCGTCTGGCCCATCACCTGATCGGTCAAGGCGTACAGGCTGACAGCCGGGTTGCAGTCTGCCTGGAACGTGGCCCGAACCTGCTTATCGGTCTGCTGGCCGTGCTCAAGGCCGGTGGTGCCTACGTGCCACTGGATCCGGGCTACCCGACCGAGCGCCTGGCCTACATGCTGGCCGACAGTGGGGCCCTGACCCTGCTGGCGGATGCCGCGACTCAGGAGCGTTTTGCCGATAACACTCTGCAACTGGTGAACCTGGATGCCAGTACCTGGGCAGCGCAATCCGCTGAAAACCCGGTGGTGCCAGGC…	O=C(N[C@@H](CC(C)C)C(N[C@@H](CC(C)C)C(N[C@@H](CCC(N)=O)C(N[C@@H](CC(C)C)C(N[C@@H](CCC(N)=O)C(N[C@@H](C(C)C)C(N[C@@H](CC(C)C)C(N[C@@H](CC(C)C)C(O)=O)=O)=O)=O)=O)=O)=O)=O)[C@H](CC1=CNC=N1)NC(CC(O)CCCCCCC)=O	['Sequence-based prediction']	['pubmed:23405865']
BGC0000323	NRP	Pseudomonas cichorii	cichofactin A	nrpspksdomains_AHZ34233.1_AMP-binding.3	valine	val	FEQRAAAHPQAVATVHGSLSLSYGELNERANRLAHYLIGQGVKPNDHVAILLPRSIDMLVGQLAIGKCAATYVPLDINAPAERQVYMIEDCKAVFVLAQRAASIDSATPRIDLDQLVLDDQPAHDPALVQNSNSVAYVMYTSGSTGAPKGVCVLHRGIARLVLNNGFADFNEQDRVAFASNPAFDASTMEVWGALLNGGQLLIIDHQTLIDPARLSDALRTVSVLFLTTALFNQYVQLIPEALKGLRYLMSGGERADPASFRAMLEHGPGPRLVNGYGPTETTTFATTNEVREVAEGAESVSIGRPIGNTSIYVLDAHQRLVPQGVIGELYIGGDGVAQGYLNRPDLTAEKFLTDPFSDEPGATMYRTGDLGRWLEDGQLECLGRNDDQVKIR	TTCGAGCAGCGCGCAGCCGCGCATCCTCAGGCCGTGGCCACCGTGCATGGCAGTCTCTCGCTGAGCTATGGCGAACTGAACGAACGCGCCAACCGTCTGGCTCATTACCTGATCGGTCAGGGCGTCAAGCCCAACGATCACGTGGCCATCCTGCTGCCGCGTTCCATTGACATGCTGGTCGGCCAACTGGCCATCGGCAAGTGCGCAGCAACCTATGTGCCGCTGGACATCAATGCACCCGCCGAGCGTCAGGTCTACATGATCGAAGACTGCAAGGCTGTGTTCGTGCTGGCTCAGCGTGCTGCGTCGATTGACTCTGCCACCCCGCGCATCGACCTGGACCAGTTGGTTCTGGACGATCAGCCGGCCCATGATCCGGCTCTGGTGCAGAACTCCAAC…	O=C(N[C@@H](CC(C)C)C(N[C@@H](CC(C)C)C(N[C@@H](CCC(N)=O)C(N[C@@H](CC(C)C)C(N[C@@H](CCC(N)=O)C(N[C@@H](C(C)C)C(N[C@@H](CC(C)C)C(N[C@@H](CC(C)C)C(O)=O)=O)=O)=O)=O)=O)=O)=O)[C@H](CC1=CNC=N1)NC(CC(O)CCCCCCC)=O	[]	['pubmed:23405865']
BGC0000323	NRP	Pseudomonas cichorii	cichofactin A	nrpspksdomains_AHZ34233.1_AMP-binding.4	leucine	leu	EAQAVQRPDAIASQVGDQHLSYSELNSKANALAHHLISLGVRPDDRVAVVARRGLETLVGLLAVLKAGAGYVPVDPAHPDERIAYLLSDSAPVAVLTQQALLAGLPPLSVPVIALDRQDWADHQDNPLVHGLSAANLAYVIYTSGSTGQPKGVMVEHRTLSNLVHWHCEAFDLHAGSHTASVAGFGFDAMAWEVWPALCAGATLHVPPADVSNEQLDSLLDWWLAQPLQVSFLSTPVAEYAFSRDLRHPTLRTLLIGGDRLRQFHRDPGFAVINNYGPTEATVVATSGQLFPDGSLDIGKPIANTQVYLLDEHQQLVPFGVAGELYVAGDGVARGYLNRPEMTAERFLDDPFSEQPGARMYRTGDLARWNADGTLEYLGRNDDQVKIR	GAGGCGCAGGCTGTTCAACGACCTGATGCCATCGCCTCGCAAGTGGGCGATCAGCACCTGAGCTACAGCGAACTGAATAGCAAGGCCAATGCCCTGGCCCATCACCTGATCAGCCTGGGCGTGCGCCCGGATGATCGTGTGGCCGTGGTCGCTCGTCGTGGTCTGGAAACCCTGGTCGGTTTGCTGGCCGTGCTCAAGGCGGGCGCGGGTTATGTGCCGGTGGACCCGGCGCATCCGGATGAGCGTATCGCTTATCTGTTGAGCGATAGCGCACCGGTGGCCGTATTGACTCAGCAAGCGCTGCTGGCCGGTCTGCCGCCATTGTCGGTGCCGGTGATTGCCTTGGATCGTCAGGATTGGGCCGATCATCAGGACAATCCACTGGTACACGGTCTGAGC…	O=C(N[C@@H](CC(C)C)C(N[C@@H](CC(C)C)C(N[C@@H](CCC(N)=O)C(N[C@@H](CC(C)C)C(N[C@@H](CCC(N)=O)C(N[C@@H](C(C)C)C(N[C@@H](CC(C)C)C(N[C@@H](CC(C)C)C(O)=O)=O)=O)=O)=O)=O)=O)=O)[C@H](CC1=CNC=N1)NC(CC(O)CCCCCCC)=O	['Sequence-based prediction']	['pubmed:23405865']
BGC0000323	NRP	Pseudomonas cichorii	cichofactin A	nrpspksdomains_AHZ34233.1_AMP-binding.5	leucine	leu	EQQAVVQPDAIAAQVGGHHLSYSELNRRANALAHHLIGQGVRPDDRVAVVARRGLETLVCLLAVLKAGAGYVPVDPGHPDDRISYLLENSEPVVVLTQLDLLARLPELPVPVIALDRADWAASPENPLVPGLTSANLAYVIYTSGSTGLPKGVMVEHHTLNNLVDWHCQAFDLKAGSHTASVAGFGFDATAWEIWPALCAGAVLHIPPAEVENEQLDTLLDWWLAQPLQVSFLPTPVAEYAFSRELRHPTLRTLLIGGDRLRNFNRDPGFAVVNNYGPTEATVVASSGTMEVGGVLHIGKPVTNARLYVLNERQQPVPLGVPGELYIGGAGVARGYLNRPDLTAERFLDDPFTAQPQARMYRTGDLVRWLADGTLEYLGRNDDQVKIR	GAGCAGCAGGCGGTTGTGCAGCCTGATGCCATTGCCGCGCAAGTGGGCGGTCATCACTTGAGCTACAGCGAGTTGAATCGCCGTGCCAATGCGCTGGCCCATCACCTGATCGGCCAAGGCGTGCGCCCGGATGATCGGGTGGCGGTGGTTGCCCGTCGCGGGCTGGAAACCCTGGTCTGCCTGCTGGCTGTGCTCAAGGCGGGCGCGGGTTATGTGCCGGTCGACCCTGGCCATCCGGACGACCGCATCAGCTACCTGCTGGAGAACAGTGAGCCGGTAGTAGTGCTGACTCAGCTCGACCTGCTGGCGCGTCTGCCTGAACTGCCGGTGCCGGTGATTGCCCTTGATCGTGCGGACTGGGCGGCCAGTCCAGAGAACCCGCTGGTTCCGGGCCTGACC…	O=C(N[C@@H](CC(C)C)C(N[C@@H](CC(C)C)C(N[C@@H](CCC(N)=O)C(N[C@@H](CC(C)C)C(N[C@@H](CCC(N)=O)C(N[C@@H](C(C)C)C(N[C@@H](CC(C)C)C(N[C@@H](CC(C)C)C(O)=O)=O)=O)=O)=O)=O)=O)=O)[C@H](CC1=CNC=N1)NC(CC(O)CCCCCCC)=O	[]	['pubmed:23405865']
BGC0000328	NRP	Pseudomonas savastanoi pv. glycinea	coronatine	nrpspksdomains_AAQ93484.1_AMP-binding.1	allo-isoleucine	ile	FESVCTQAPNAIAVVHEGKPVTYQQLQTQVLERSEALIRQGLADHPYMPLMANRCLEYLITMLACCKLGITYVSIEPSTPSKRLIAVLEQLGCNHLLLLGQPTDLRPDPTLTCFRLDDCGTLCSDGPALRQPIRRRLDDASVITVMFTSGTTGVPKGVRISQDGLLNLVDNVQQQVQGKPRSYVHHSSIGFDAALFEVWVPLLTGACVTLQPSEFNIDALDHCVRAASCDVLLLTTSLFHLVAQHRLSMLEAVRVLYVGGEVLKPVHARALLLANPRITLVNGYGPTENTVFSTWYSLNKPEDAERDVIPIGQFLHQVHGKIVDAKLQEVEVGTPGELLLTGANLALGYLDEALTPTRFLQLPEGTYYRTGDYVIQDEHGMLFYQGRIDEQVKIK	TTTGAGTCGGTCTGCACGCAAGCGCCAAACGCAATTGCGGTGGTGCACGAAGGAAAACCAGTCACTTATCAACAGCTCCAGACGCAGGTGTTGGAACGTAGCGAAGCACTGATACGTCAAGGCCTGGCAGACCATCCTTACATGCCGCTGATGGCCAACCGGTGCCTTGAGTATCTGATAACGATGCTGGCCTGCTGCAAACTGGGAATTACCTACGTCTCCATCGAGCCAAGCACGCCAAGCAAACGCCTGATCGCCGTGCTGGAACAATTGGGCTGCAATCATTTGCTATTGCTCGGTCAGCCAACGGACTTGCGCCCTGACCCAACGCTAACATGCTTTCGCCTGGACGACTGCGGCACTCTGTGCTCCGACGGCCCTGCCCTACGCCAGCCTATC…	CCC1CC1(NC(=O)C1=CC(CC)CC2C1CCC2=O)C(O)=O	['Structure-based inference', 'ATP-PPi exchange assay', 'Radio labelling']	['pubmed:14679222']
BGC0000329	NRP	Pseudomonas corrugata	corpeptin A	nrpspksdomains_crpC_AMP-binding.1	serine	ser	DRLAYMLESSAPAVVLTQRALQMNLPATAARVIVLEDEDFATQPTGNPQVQGLRADHLAYVIYTSGSTGLPKGVMNEHGAVVNRLLWMQDAYTLSAADAVLQKTPFSFDVSVWEFFWPLFTGARLVMARPGGHRDPAYLREVIQTQGITTLHFVPSMLDVFLAHGEAGECEGLRQVMCSGEALPGHLVRRFKAQLPRTSLHNLYGPTEAAVDVTAWDCSGAETPDSTPIGKPIANTRIYLLDAHQQPVPMGVAGEIYIGGVQVARGYLHRPELTAERFLDDPFSERPNARMYRTGDLGRYLADGNIDYLGRNDDQVKIR	GATCGCCTGGCCTACATGCTGGAAAGCAGCGCCCCAGCCGTAGTACTCACCCAGCGCGCCTTGCAGATGAACCTGCCCGCGACCGCTGCCAGAGTGATCGTGCTCGAAGATGAAGACTTTGCCACGCAGCCAACCGGCAATCCACAGGTGCAGGGCCTGCGGGCCGATCACCTGGCTTACGTGATCTACACCTCCGGCTCCACCGGCCTGCCCAAGGGCGTGATGAACGAGCATGGCGCGGTGGTCAACCGCCTGTTGTGGATGCAGGATGCCTACACGCTGAGCGCCGCGGACGCGGTGCTGCAGAAGACCCCGTTCAGCTTCGACGTCTCTGTGTGGGAGTTCTTCTGGCCGCTGTTCACCGGCGCCCGGCTGGTGATGGCGCGTCCCGGTGGACAT…	CCCCCCCC(CC(=N/C(=C\C)/C(=O)N1CCC[C@H]1C(=N[C@@H](C)C(=N[C@@H](C)C(=N[C@@H](C)C(=N[C@@H](C(C)C)C(=N[C@@H](C(C)C)C(=N/C(=C\C)/C(=N[C@@H](CCO)C(=N[C@@H](C(C)C)C(=N[C@@H]([C@H](C)CC)C(=NC(=C)C(=N[C@@H](C)C(=N[C@@H](C)C(=N[C@@H](C)C(=N[C@@H](C(C)C)C(=N/C(=C\C)/C(=N[C@H]2[C@@H](OC(=O)[C@@H](N=C([C@@H](N=C([C@@H](N=C([C@@H](N=C2O)C)O)CCN)O)CO)O)[C@@H](C)CC)C)O)O)O)O)O)O)O)O)O)O)O)O)O)O)O)O)O)O	['Structure-based inference', 'Sequence-based prediction']	['pubmed:25231335']
BGC0000329	NRP	Pseudomonas corrugata	corpeptin A	nrpspksdomains_crpC_AMP-binding.2	isoleucine	ile	FEAQVKARPEGIALQHGAQQLTYRELHERANHLAHCLLERGVQPGSRVAIMLNRSFELVISELAILKCAAVYVPLDHHAPEERQRFMLQDSAAVLVLTTSDRGLPEDMPRLDLDTLQVIQAARPAVFPGQTSDTPAYIMYTSGSTGHPKGVIVPHLAIGRLAINNGYADFGVQDHVAFASNPAFDASTMEVWGALLNGGRVVIIDHETLLSPTQFAQALTDAEVSVLFVTTAMFNQYLVLIPDALAGLRILLCGGERGDPASFRRLLAHAPSLRLVHCYGPTETTTFATTHVVTAVPHGATSVPIGRPIANTRVYILDAARQPVPVGVAGEIHIGGVGVALGYLNRPDLTEERFIADPFSDSGTARLYRSGDLGRWLPDGTIEYLDRNDGQVKIR	TTCGAAGCCCAGGTCAAAGCCCGGCCTGAAGGGATTGCACTCCAGCATGGGGCGCAGCAACTCACCTACCGGGAGCTGCACGAGCGGGCCAATCACCTGGCGCATTGCTTGCTTGAACGGGGCGTCCAGCCAGGGTCGCGGGTCGCGATCATGCTGAACCGTTCGTTTGAGCTCGTCATCAGCGAACTGGCGATCCTCAAGTGCGCCGCCGTCTACGTACCGCTGGATCACCATGCGCCCGAGGAGCGGCAGCGCTTCATGTTGCAAGACAGTGCCGCAGTGCTGGTGCTGACGACCAGTGACAGGGGCTTGCCGGAAGACATGCCGCGATTGGACCTGGACACGCTGCAGGTGATCCAGGCTGCAAGGCCGGCGGTATTCCCCGGTCAAACCAGCGAT…	CCCCCCCC(CC(=N/C(=C\C)/C(=O)N1CCC[C@H]1C(=N[C@@H](C)C(=N[C@@H](C)C(=N[C@@H](C)C(=N[C@@H](C(C)C)C(=N[C@@H](C(C)C)C(=N/C(=C\C)/C(=N[C@@H](CCO)C(=N[C@@H](C(C)C)C(=N[C@@H]([C@H](C)CC)C(=NC(=C)C(=N[C@@H](C)C(=N[C@@H](C)C(=N[C@@H](C)C(=N[C@@H](C(C)C)C(=N/C(=C\C)/C(=N[C@H]2[C@@H](OC(=O)[C@@H](N=C([C@@H](N=C([C@@H](N=C([C@@H](N=C2O)C)O)CCN)O)CO)O)[C@@H](C)CC)C)O)O)O)O)O)O)O)O)O)O)O)O)O)O)O)O)O)O	['Structure-based inference', 'Sequence-based prediction']	['pubmed:25231335']
BGC0000344	NRP	Pseudomonas entomophila L48	entolysin	nrpspksdomains_PSEEN3044_AMP-binding.1	valine	val	FEAHASLNPEALAVVHGQQRWRYAQLEAQANRLARCLLEHGVQPGDRVALLLPRSFDLLAAQLAVSKCAAVFVPLDGNAPVERQAFMVADSQAVVLLTHSDQPQIEGGRRFELDRLDLGRYASEPLNLAVDAGSAAYIMYTSGSTGTPKGVQVPHRAIVRLAINNGFADFNSQDRVAFASNPAFDASTLEVWAPLLNGGAVVVIDQDQVLSRQALHDELLAQSVTVLWLTAGLFHQFADDLLPAFRRLRYLMVGGDVLDPAVIARVLRDGAPQHLLNGYGPTEATTFSTTHEIVSVGEGSIPIGKPIGNARCYVLDARRQLLPVGAVGELYIAGDGVALGYLGQPELTAERFLADPFNGGSMYRSGDLACWQADGTLRYLGRADQQVKLR	TTCGAGGCGCACGCCAGCCTGAACCCTGAGGCGCTGGCGGTGGTGCATGGGCAGCAACGCTGGCGCTATGCCCAGCTCGAGGCCCAGGCCAATCGCCTGGCCCGTTGCCTGCTTGAGCATGGCGTGCAACCCGGCGACCGGGTGGCCTTGCTGCTGCCCCGTTCCTTCGACCTGCTGGCGGCCCAGCTGGCCGTGAGCAAATGCGCGGCAGTGTTCGTGCCGCTGGACGGTAACGCGCCGGTCGAGCGCCAGGCGTTCATGGTCGCGGACAGCCAGGCCGTGGTGTTGCTGACCCACAGCGACCAGCCGCAAATCGAGGGCGGGCGTCGGTTCGAGCTGGACCGGCTCGACCTGGGCCGCTATGCGAGCGAACCGCTGAACCTGGCGGTGGACGCCGGC…	[]	[]	['pubmed:20023108']
BGC0000344	NRP	Pseudomonas entomophila L48	entolysin	nrpspksdomains_PSEEN3044_AMP-binding.3	serine	ser	EAQVRRTPDAVAVKAEEGGLTYRQLDEQANRLAHHLIALGVKPDDRVAICVERGLAMVVGLLAILKAGGAYVPVDPEYPAERIRHMLSDSAPVVVLVHAATRHVPEAATVPLIDLDRPSWLEQPVQAPVVKGLTPRHLAYVIYTSGSTGLPKGVMNEHAGVVNRLLWMQDAYQLGADDVVLQKTPFSFDVSVWEFLWPLQTGARLVMARPGGHRDPEYLREVIRAEQVSTLHFVPSMLDVFLAHGAVQPERLKRVLCSGEALPGALVRRFHAQLPTVELHNLYGPTEAAVDVSAWHCMTAPDNTPIGKPIANTTLYVLDGHGQPVPQGVAGELYIGGVQVARGYLNRAELTAERFLDDPFGTRPGARLYRTGDLARHLADGNLEYLGRNDDQVKLR	GAAGCCCAGGTGCGACGCACCCCGGACGCCGTGGCGGTGAAAGCCGAAGAGGGCGGGCTGACTTACCGCCAGCTCGACGAACAGGCCAACCGCCTGGCCCATCACCTGATCGCCCTGGGCGTGAAACCTGACGATCGCGTGGCGATCTGCGTGGAGCGCGGCCTGGCGATGGTGGTCGGCCTGCTGGCCATCCTCAAGGCGGGTGGCGCCTATGTGCCGGTAGATCCGGAGTACCCGGCCGAGCGCATCCGCCACATGCTCAGTGACAGCGCTCCGGTGGTGGTGCTGGTGCACGCGGCCACGCGCCACGTGCCTGAGGCCGCCACGGTGCCGCTGATCGACCTCGACCGCCCAAGCTGGCTGGAGCAACCGGTGCAGGCACCGGTGGTGAAGGGGCTG…	[]	[]	['pubmed:20023108']
BGC0000344	NRP	Pseudomonas entomophila L48	entolysin	nrpspksdomains_PSEEN3045_AMP-binding.1	glutamine	gln	FERRAQAHPQAIAVQTEDGQLTYGQLNEQANRLAHHLIGLGVKVDDRVAICVERGPSLLVGLLAILKAGGAYVPVDPAYPGERIRHMLGDSAPVAVLVHAATRAVPGTAEVPRVDLDQPSWGALPRHNPLVPGLTPRHLAYVIYTSGSTGVPKGVMVEHRNVVNLVHWSAGLFPAEGTVLHKTPVSFDASVWELFWPLCSGLRLVLARPDGQRDPQYLVELIEQQRVGVVQFVPALLQQFLEQAGSARCASLTDIVCGGGELTEALARLVRERLPQARLHNVYGPTETTVDCSVWTLEPRDPLPPGPLPIGRPIDNTRLYVLDSADQPLPWGVAGHLHIGGAGVTRGYLGLPEQQAERFIASPFVKGDRLYRSGDLVRQREDGVLEFLGRTDQQIKL	TTCGAGCGCCGGGCCCAGGCGCACCCGCAGGCCATCGCGGTCCAGACCGAAGACGGGCAGCTGACCTATGGCCAGCTCAACGAGCAGGCCAACCGCCTGGCCCACCACCTGATCGGGCTGGGTGTGAAGGTGGACGACCGCGTGGCGATCTGTGTCGAGCGCGGGCCGTCCCTGCTGGTCGGCCTGCTGGCCATCCTCAAGGCCGGCGGTGCCTACGTGCCGGTCGACCCGGCCTATCCGGGCGAGCGCATCCGCCACATGCTGGGCGACAGCGCGCCGGTCGCGGTGCTGGTGCACGCTGCCACGCGTGCGGTTCCAGGGACCGCCGAGGTACCGAGGGTCGACCTCGATCAGCCGAGCTGGGGCGCATTGCCAAGGCACAATCCCCTGGTGCCTGGG…	[]	[]	['pubmed:20023108']
BGC0000344	NRP	Pseudomonas entomophila L48	entolysin	nrpspksdomains_PSEEN3045_AMP-binding.2	valine	val	FEEHALRTPQALAVVHGQQHWSYAQLDAQANRLARCLVEGGVQPGDRVALLLPRSFDLLAAQLAVSKCAAVFVPLDGNAPVERQAFMVADSQAVMLLTHSDQPQIEGGRRVELDRLDLARYASEPLNLAVDAGSAAYIMYTSGSTGTPKGVQVPHRAIVRLAINNGFADFNSQDRVAFASNPAFDASTLEVWAPLLNGGAVVVIDQDQVLSRQALRDELLAQGVTVLWLTAGLFHQFADDLLPAFRTLRYLMVGGDVLDPAVIARVLRDGAPQHLLNGYGPTEATTFSTTHEIVSVGEGSIPIGKPIGNARCYVLDARRQLLPVGAVGELYIAGDGVALGYLGQPELTAERFLADPFNSGTMYRSGDLACWQADGTLRYLGRADQQVKLR	TTCGAAGAGCATGCCCTGCGCACGCCGCAGGCGTTGGCGGTGGTGCATGGTCAGCAACACTGGAGCTATGCCCAACTTGATGCCCAGGCCAATCGGCTGGCCCGTTGTCTGGTCGAAGGTGGCGTCCAGCCTGGCGATCGGGTGGCCTTGCTGCTGCCCCGTTCCTTCGACCTGCTGGCGGCCCAGTTGGCCGTGAGCAAGTGCGCGGCGGTGTTCGTGCCGCTGGACGGTAACGCGCCGGTCGAGCGCCAGGCGTTCATGGTCGCGGACAGCCAGGCCGTGATGTTGCTGACCCACAGTGACCAGCCGCAGATCGAGGGCGGGCGTCGGGTCGAACTGGACCGGCTCGACCTGGCCCGCTACGCGAGCGAACCGCTGAACCTGGCGGTGGATGCCGGC…	[]	[]	['pubmed:20023108']
BGC0000344	NRP	Pseudomonas entomophila L48	entolysin	nrpspksdomains_PSEEN3045_AMP-binding.4	glutamine	gln	FERQAERQPEAIGVQADGAQLSYRQLNEQANRLAHHLIALGVKPDDRVAICVERGLSLVVGLLAILKAGGAYVPVDPDYPAERISHMLGDSQPRAVLVQGATRGLVGSPVTLVDMDQPTWAALPASNPQVPGLTSDHLAYVIYTSGSTGVPKGVMVEHRNVVNLVHWSAGLFPAEGAVLHKTPVSFDASVWELFWPLCSGLRLVLARPDGQRDPQYLVELIEQQRVGVVQFVPALLQQFLEQVGKRCTSLTDIVCGGGELTEALARQVRERLPQVRLHNVYGPTEATVDCSAWTLEPQDPLPHGALPIGRPIDNTRLYVLDAHDHPVPFGVAGQLHIGGAGVTRGYFGLPEQQAERFIASPFVEGDRLYRSGDLVRQRPDGVLEFLGRTDHQIKLR	TTTGAACGGCAGGCCGAGCGCCAGCCTGAAGCGATTGGCGTGCAGGCGGATGGCGCGCAACTGAGCTATCGCCAGCTCAACGAACAGGCCAATCGCTTGGCCCATCACCTGATTGCGCTCGGGGTGAAACCCGATGATCGGGTGGCGATCTGTGTCGAGCGTGGTCTGTCGCTGGTGGTGGGTCTGCTGGCCATTCTCAAGGCGGGTGGCGCCTATGTGCCGGTCGATCCGGACTACCCGGCCGAGCGCATCAGCCACATGCTCGGTGACAGCCAGCCACGAGCGGTGCTGGTACAGGGTGCTACCCGTGGCCTGGTGGGCTCGCCTGTGACACTGGTCGACATGGACCAGCCGACTTGGGCGGCGTTGCCGGCCAGCAACCCGCAGGTGCCTGGCCTG…	[]	[]	['pubmed:20023108']
BGC0000344	NRP	Pseudomonas entomophila L48	entolysin	nrpspksdomains_PSEEN3045_AMP-binding.5	valine	val	FEAHAESSPEALAVIHGERHWSYRALDQHANRLAGYLLELGVQAGDRVALLLPRSFDLLAAQLAVSKCAAVFVPLDGNAPVERQAFMVADSQAVVLLTHSDQPQVEGGRRVELDRLDLGRYASEPLNLAVDAGSAAYIMYTSGSTGTPKGVQVPHRAIVRLVINNGFADFNSQDRVAFASNPAFDASTLEVWAPLLNGGAVVVIDQDQVLSRQALGDTLLTHGVTVLWLTAGLFHQFADDLLPAFRRLRYLMVGGDVLDPAVITRVLRDGAPQHLLNGYGPTEATTFSTTHEIVSVGEGSIPIGKPIGNARCYVLDARRQLLPVGAVGELYIAGDGVALGYLGQPELTAERFLIDPFNGGTMYRSGDLACWQADGTLRYLGRADQQVKLR	TTCGAGGCGCACGCCGAATCCAGCCCCGAGGCGCTGGCAGTCATCCATGGCGAGCGCCACTGGAGCTATCGCGCGCTCGACCAGCACGCCAATCGCCTGGCGGGTTACCTGCTGGAGCTGGGCGTGCAGGCTGGCGACCGGGTGGCCTTGCTGCTGCCGCGCTCCTTCGATCTGTTGGCGGCCCAGTTGGCCGTGAGCAAGTGCGCGGCGGTGTTCGTGCCGCTGGACGGCAACGCGCCGGTCGAGCGCCAGGCGTTCATGGTCGCGGACAGCCAGGCCGTGGTGTTGCTGACCCACAGTGACCAGCCGCAGGTTGAGGGCGGGCGTCGGGTCGAGCTGGACCGGCTCGACCTGGGCCGCTATGCGAGCGAACCGCTGAACCTGGCGGTGGACGCCGGC…	[]	[]	['pubmed:20023108']
BGC0000344	NRP	Pseudomonas entomophila L48	entolysin	nrpspksdomains_PSEEN3045_AMP-binding.7	glutamine	gln	AQAPEAIAVTAEQGELSYRQLNEQANRLAHHLIALGVKPDDRVAICVERGLSLVVGLLAILKAGGAYVPVDPDYPAERISHMLGDSQPRAVLVQGATRGLVGSPVTLVDMDQPTWAALPASNPQVPGLTSNHLAYVIYTSGSTGVPKGVMVEHRNVVNLVHWSAGLFPTSGAVLHKTPVSFDASVWELFWPLCSGLRLVLARPDGQRDPQYLVELIEQQQVGVVQFVPALLQQFLEQVGNRCSSLTDIVCGGGELTEALTRQVRERLPQARLHNVYGPTEATVDCSAWTLEPQDPLPHGPLPIGRPIDNTRLYVLDAHDQPVPFGVAGQLHIGGAGVTRGYFGLAEQQAERFIASPFVEGERLYRSGDLVRQRPDGVLEFLGRTDHQIKLR	GCCCAGGCGCCTGAGGCGATAGCGGTCACGGCCGAGCAAGGTGAGCTCAGCTATCGCCAGCTCAACGAGCAGGCCAACCGCCTGGCCCATCACCTGATCGCGCTCGGGGTGAAACCTGATGATCGGGTGGCGATCTGTGTCGAGCGCGGCCTGTCGCTGGTGGTGGGTCTGCTGGCCATCCTCAAGGCGGGTGGCGCCTATGTGCCGGTCGATCCGGACTACCCGGCCGAACGCATCAGCCACATGCTCGGCGACAGCCAGCCGCGGGCAGTGCTGGTACAGGGCGCTACCCGTGGCCTGGTGGGCTCGCCGGTGACACTGGTCGACATGGACCAGCCGACTTGGGCGGCGTTGCCGGCCAGCAACCCGCAGGTGCCAGGTCTTACCTCGAACCATCTG…	[]	[]	['pubmed:20023108']
BGC0000344	NRP	Pseudomonas entomophila L48	entolysin	nrpspksdomains_PSEEN3045_AMP-binding.8	serine	ser	EAQVRRTPDAVAVKAEEGGLTYRQLDEQANRLAHHLIALGVKPDDRVAICVERGLAMVVGLLAILKAGGAYVPVDPEYPAERIRHMLSDSAPVVVLVHAATRHVPEAATVPLIDLDRPSWLEQPVQAPVVKGLTPRHLAYVIYTSGSTGLPKGVMNEHAGVVNRLLWMQDAYQLGADDVVLQKTPFSFDVSVWEFLWPLQTGARLVMARPGGHRDPEYLREVIRAEQVSTLHFVPSMLDVFLAHGAVQPERLKRVLCSGEALPGALVRRFQAQLPTVELHNLYGPTEAAVDVSAWHCVTAPDNTPIGKPIANTTLYVLDGHGQPVPQGVAGELYIGGVQVARGYLNRAELTAERFLDDPFGTRPGGRLYRTGDLARHLADGNLEYLGRNDDQVKLR	GAAGCCCAGGTGCGACGCACCCCGGACGCCGTGGCGGTGAAAGCCGAAGAGGGCGGGCTGACTTACCGCCAGCTCGACGAACAGGCCAACCGCCTGGCCCATCACCTGATCGCCCTGGGCGTGAAACCCGACGATCGCGTGGCGATCTGCGTGGAGCGCGGCCTGGCGATGGTGGTCGGCCTGCTGGCCATCCTCAAGGCGGGTGGCGCCTATGTGCCGGTCGATCCGGAATACCCGGCCGAGCGCATCCGCCACATGCTCAGTGACAGCGCTCCGGTGGTGGTGCTGGTGCACGCGGCCACGCGCCACGTGCCTGAGGCCGCCACGGTGCCGCTGATCGACCTCGACCGCCCAAGCTGGCTGGAGCAACCGGTGCAGGCACCGGTGGTGAAGGGGCTG…	[]	[]	['pubmed:20023108']
BGC0000398	NRP	Pseudomonas sp. CMR12a	orfamide B	nrpspksdomains_ofaA_AMP-binding.1	leucine	leu	EAWAEHTPEAIALVAQGRTLSYAQLNQRANTLARHLLTLGVSPDDRVAMVARRSPETLVGLLAILKAGAGYVPIDPAHPAERLAYLLEDCAPVAVLTQGSLAEGLPPLSVPVLSVDSEQWRQGSPRNLQVPGLTPQHLAYVIYTSGSTGLPKGVLVEHRSLSGLVDWHCQAFDLRPGSQASCLAGFGFDAMAWEVWPTLCAGATLHLAPVSEGPENLDALLAWWRTQPLDLSFLPTPVAEYAFSQQSGHPTLRTLLVGGDRLRQAPGEQGFVLVNNYGPTEATVVATSGVIEVDAPLHIGRPIANARIYLLDEQQQPLPIGVPGELYVGGAGVARGYLNRPQLTAERFLDDPFSDQPGARMYRTGDLARWQRDGTLEYLGRNDDQVKIR	GAAGCCTGGGCCGAGCACACCCCCGAAGCCATCGCCCTGGTGGCCCAGGGACGGACCCTGAGCTATGCCCAGCTCAACCAGCGGGCCAATACCCTGGCCCGGCACCTGCTGACATTGGGCGTAAGCCCGGACGACCGGGTCGCCATGGTCGCCCGACGTAGCCCCGAGACCCTGGTGGGCCTGTTGGCGATCCTCAAGGCGGGGGCCGGTTATGTGCCCATCGATCCGGCTCATCCGGCCGAGCGCCTGGCCTACCTGTTGGAGGACTGTGCGCCGGTGGCGGTGCTTACCCAGGGAAGCCTGGCGGAAGGGTTGCCGCCCCTGTCGGTGCCGGTTCTGAGCGTGGACAGCGAACAGTGGCGCCAGGGCAGCCCCCGTAATCTGCAGGTTCCCGGATTG…	CCCCCCCCCCCC(O)CC(=O)NC(CC(C)C)C(=O)NC(CCC(O)=O)C(=O)NC1C(C)OC(=O)C(NC(=O)C(CO)NC(=O)C(CC(C)C)NC(=O)C(CC(C)C)NC(=O)C(CO)NC(=O)C(CC(C)C)NC(=O)C(NC1=O)C(C)C)C(C)C	['Structure-based inference']	['pubmed:24673852']
BGC0000398	NRP	Pseudomonas sp. CMR12a	orfamide B	nrpspksdomains_ofaA_AMP-binding.2	glutamic acid	glu	FEAQVRRTPQAIALQAGEQCLSYAQLNHEANQLAHHLRELGVGPDVRVGLCVERGPQLLVGLLGILKAGGAYVPLDPDYPAERLRFLVQDSQPRVLLVQQSTRHLLQGPGLALLDFDHAAWHHQPGHDPQVPGLNVSHLAYVIYTSGSTGTPKGVMVEHRGLGNLMHWGSQLCPQSGGGTLLQKAPFSFDGSVWELFWPLVTGMRLLLARPGGQREPTYLAQLVVEQQVTMVKFVPAMLLQFLQLEESGQCQSLTDVFCGGGELTEAIARLFRQRLPRARLHNVYGPTEATVDSTAWTLEPGAAIPAVQLPIGRAITNTRLYVLDTHDQPVPRGVSGQLHIGGVGVARGYLGLAQLQAERFIDSPFVAGDRLYRTGDLVRYGDDGNLEFLGRNDFQIKLR	TTCGAGGCCCAGGTGCGGCGCACTCCCCAGGCCATTGCGCTGCAAGCCGGCGAGCAGTGCCTGAGCTATGCACAGCTCAACCATGAAGCCAACCAGCTCGCCCATCACCTGCGCGAACTGGGTGTCGGGCCGGATGTCCGGGTCGGGCTCTGTGTCGAGCGCGGTCCGCAACTGCTGGTGGGCTTGTTGGGGATTCTCAAGGCCGGCGGGGCCTATGTGCCGCTGGACCCGGACTATCCGGCCGAGCGCCTGCGTTTCCTGGTCCAGGATAGCCAGCCACGGGTGCTGCTGGTACAGCAGTCGACCCGGCATCTGCTGCAAGGCCCGGGCCTGGCGCTGCTGGACTTCGACCATGCGGCCTGGCACCACCAGCCCGGCCATGACCCGCAGGTACCGGGA…	CCCCCCCCCCCC(O)CC(=O)NC(CC(C)C)C(=O)NC(CCC(O)=O)C(=O)NC1C(C)OC(=O)C(NC(=O)C(CO)NC(=O)C(CC(C)C)NC(=O)C(CC(C)C)NC(=O)C(CO)NC(=O)C(CC(C)C)NC(=O)C(NC1=O)C(C)C)C(C)C	['Structure-based inference']	['pubmed:24673852']
BGC0000398	NRP	Pseudomonas sp. CMR12a	orfamide B	nrpspksdomains_ofaB_AMP-binding.1	threonine	thr	EAQARVQPEAPALIFQGQRLSYGQLNQRANQVAHRLLALGVRPDQRVAICVERGLEMIIGLLGILKAGGAYVPIDPAYPRERIAYTLQDSAPVALLVQADTQALVADQRVPLIDLDSRSLAHEALDNPEVAGLNATHLAYVIYTSGSTGLPKGVMVEHRNVARLFAATRDWFDFNWRDVWALFHSFAFDFSVWEIWGALVHGGQLLVVPQAVSRSPDACYALLCEASVSILNQTPSAFRSLIAAQGRSALKHSLRQVIFGGEALEPGMLKPWYARVGNVGTQLVNMYGITETTVHVTYRPLQAADVQLVGISPIGRRIPDLQLYVLDARREPLPVGVVGELYVGGAGVARGYLNRDQLTAERFIDDPFSARAGARLYKTGDLARWRTDGSLEYLGRNDD…	GAAGCCCAGGCGCGGGTCCAGCCCGAGGCCCCGGCGCTGATCTTCCAGGGGCAGCGCCTGAGCTACGGCCAGCTCAACCAGCGCGCCAACCAGGTCGCCCACCGTTTGCTGGCCCTTGGGGTGCGCCCTGACCAGCGCGTGGCGATCTGTGTCGAGCGCGGGCTGGAAATGATCATTGGCCTGTTGGGGATCCTCAAGGCCGGTGGCGCCTACGTGCCCATCGACCCGGCTTATCCGCGCGAACGTATCGCCTACACCTTGCAGGACAGTGCCCCGGTGGCGTTGCTGGTACAGGCCGATACCCAGGCCCTGGTGGCCGACCAGCGGGTGCCGCTGATCGATCTCGACAGCCGCAGCCTGGCCCACGAAGCCCTGGACAACCCCGAGGTCGCGGGGCTC…	CCCCCCCCCCCC(O)CC(=O)NC(CC(C)C)C(=O)NC(CCC(O)=O)C(=O)NC1C(C)OC(=O)C(NC(=O)C(CO)NC(=O)C(CC(C)C)NC(=O)C(CC(C)C)NC(=O)C(CO)NC(=O)C(CC(C)C)NC(=O)C(NC1=O)C(C)C)C(C)C	['Structure-based inference']	['pubmed:24673852']
BGC0000398	NRP	Pseudomonas sp. CMR12a	orfamide B	nrpspksdomains_ofaB_AMP-binding.2	valine	val	FEEQVLERPQQVAAVHGQEVLSYAQLNARANQLAHHLLSLGVKPGAHLALLLPRSIDLLVGQLAASKCGVAYVPLDGNAPASRQAFMVQDSQSVMLLTRSDQLLDVPVSRLELDRLSLQETPTHNPDLQLSSEAVAYIMYTSGSTGEPKGVLVPHRAITRLVINNGYADFNVGDRVAFASNPAFDASTLDVWGPLLNGGRVVVVDHQTLLDPPAFAQLLQASGVTMLFLTTSLFNQYVQLIPQALKGLHMLLCGGERADATAFRRMQAQAPGLRLVNGYGPTETTTFAVTHEPWELPADADSLPIGRPLSNTQVYILDTRQQPLPIGVAGEIVIGGDGVALGYLNRPELNAQKFIDDPFGERSGALLYRTGDIGRWLDNGLLEYLGRSDDQVKIR	TTCGAGGAGCAGGTCCTGGAGCGCCCGCAACAGGTCGCGGCGGTGCATGGCCAGGAGGTGCTCAGCTATGCCCAGCTCAACGCTCGGGCCAACCAGCTGGCTCACCACTTGCTAAGCCTTGGCGTGAAGCCTGGGGCTCATCTGGCCCTCTTGCTGCCGCGTTCCATCGATCTGCTGGTGGGCCAGCTGGCGGCCAGTAAATGCGGTGTGGCCTACGTACCGCTGGACGGCAATGCCCCAGCCTCGCGCCAGGCGTTCATGGTCCAGGACAGCCAGAGCGTGATGCTGTTGACCCGCAGCGACCAGCTACTGGATGTGCCGGTGTCGCGCCTGGAGCTGGATCGGCTGTCGTTGCAGGAGACGCCCACGCACAATCCGGATCTGCAGCTGTCCAGCGAA…	CCCCCCCCCCCC(O)CC(=O)NC(CC(C)C)C(=O)NC(CCC(O)=O)C(=O)NC1C(C)OC(=O)C(NC(=O)C(CO)NC(=O)C(CC(C)C)NC(=O)C(CC(C)C)NC(=O)C(CO)NC(=O)C(CC(C)C)NC(=O)C(NC1=O)C(C)C)C(C)C	['Structure-based inference']	['pubmed:24673852']
BGC0000398	NRP	Pseudomonas sp. CMR12a	orfamide B	nrpspksdomains_ofaB_AMP-binding.3	leucine	leu	FEARVRAAPDAVALVQGPLRLSYRQLDQQANQLARKLLAFGVQPDDRVALCMARGPQLLQGMLAVLKAGAAYVPIDPSHPAERIAYLVQDSAPRALLVAGGLSPVPGVPVLDLDREVWSDSDPDTPQVPRLTPAHLAYVIYTSGSTGQPKGVMVEHQSLENLVHWHCQAFDLGPGRHASSLAGLGFDAMAWEVWPTLCSGATLHLPPADIGHQDIERLLAWWRDQPLDVSFLPTPVAEYAFNQQLRHPTLRTLLIGGDRLRQFARDPGFTVVNNYGPTEATVVATSGALVAGGALHIGRPMANARIYLLDELLRPVPVGVAGELYVGGAGVARGYLNRPELTAERFLDDPFSAEPGARMYRSGDLARWREDGTLDYLGRNDDQVKVR	TTCGAGGCCCGGGTCCGGGCGGCGCCCGACGCCGTGGCGCTGGTCCAGGGGCCGCTGCGCCTGAGCTATCGCCAGCTGGACCAGCAGGCCAATCAGCTGGCCCGGAAACTCTTGGCGTTCGGCGTGCAACCCGATGACCGGGTGGCCTTGTGCATGGCCCGTGGTCCCCAACTGTTGCAAGGGATGCTCGCGGTGCTCAAGGCCGGGGCCGCCTATGTGCCCATCGACCCGAGCCATCCGGCCGAGCGCATCGCCTACCTGGTACAGGACAGCGCACCCCGGGCGCTGCTGGTGGCCGGCGGCCTGTCGCCAGTGCCTGGGGTACCGGTGCTCGACCTCGATCGCGAGGTCTGGAGCGACAGCGACCCGGACACCCCGCAGGTGCCGCGGCTGACCCCG…	CCCCCCCCCCCC(O)CC(=O)NC(CC(C)C)C(=O)NC(CCC(O)=O)C(=O)NC1C(C)OC(=O)C(NC(=O)C(CO)NC(=O)C(CC(C)C)NC(=O)C(CC(C)C)NC(=O)C(CO)NC(=O)C(CC(C)C)NC(=O)C(NC1=O)C(C)C)C(C)C	['Structure-based inference']	['pubmed:24673852']
BGC0000398	NRP	Pseudomonas sp. CMR12a	orfamide B	nrpspksdomains_ofaB_AMP-binding.4	serine	ser	FEAQVLRSPEALAVQAGEQRLSYRQLNQQANQLAGHLLQLGVGPDQRVAICVERSVDMVLGLLAILKAGGAYVPIDPAYPQERIDYMLQDSAPLAVLVQGATRHLAQASGLALLDLDQPQWAGQSRDNPQLPHLTPRHLAYVIYTSGSTGQPKGAMNEHRAVVNRLLWMQEQYRLDVDDAVLQKTPFSFDVSVWEFFWPLFTGARLVMARPEGHKDPAYLRQLIREQGISTLHFVPSMLDVFLAHDATPDDLGLRQVMCSGEALPGSLVRRFKQQLPNVALHNLYGPTEAAVDVTAWDCTGPLDATPDNTPIGKPIANTRLYLLDAQLQPVPLGVVGELFIAGVQVARGYLNREQLTAERFVDDPFSAEPGARMYRTGDLGRYLTDGNIEYLGRNDDQV…	TTCGAGGCCCAGGTGCTGCGCAGCCCCGAGGCCTTGGCGGTGCAGGCCGGGGAGCAGCGCTTGAGTTATCGCCAGCTCAACCAGCAGGCCAACCAGTTGGCCGGGCACTTGCTGCAATTGGGCGTTGGCCCGGACCAGCGGGTGGCGATCTGCGTCGAGCGCAGCGTCGACATGGTGCTGGGCCTGCTGGCGATCCTCAAGGCCGGGGGCGCCTACGTGCCCATCGATCCGGCCTATCCCCAGGAGCGGATCGACTACATGCTCCAGGACAGCGCGCCGCTGGCGGTGCTGGTCCAGGGTGCGACCCGGCACCTGGCGCAGGCGTCCGGGCTGGCGTTGCTGGACCTGGACCAGCCGCAATGGGCCGGACAGTCCCGGGACAACCCGCAGCTGCCGCAC…	CCCCCCCCCCCC(O)CC(=O)NC(CC(C)C)C(=O)NC(CCC(O)=O)C(=O)NC1C(C)OC(=O)C(NC(=O)C(CO)NC(=O)C(CC(C)C)NC(=O)C(CC(C)C)NC(=O)C(CO)NC(=O)C(CC(C)C)NC(=O)C(NC1=O)C(C)C)C(C)C	['Structure-based inference']	['pubmed:24673852']
BGC0000398	NRP	Pseudomonas sp. CMR12a	orfamide B	nrpspksdomains_ofaC_AMP-binding.1	leucine	leu	EAQAARAPQALAACHQGRSLSYAELNQQANGLARQLRALGVRPEDRVAIVARRSLETLVGLLAILKSGAGYVPIDPAHPAERLSYLLEDSAPRVVLAQAELLSRLAPQAVPVLELDPRHWQEQGQDNLEVPGLSASNLAYVIYTSGSTGLPKGVMVEHQSLGNLVDWHCQAFDLQPGRHTSSLAGFGFDAMAWEVWPALCSGAVLHLAPASEGTEDVDALLDWWRQQPLQVSFLPTPVAEYAISQQVGHPTLQTLLVGGDRLRQFDRGQTFTLVNNYGPTEATVVATSGPVETGGSLDIGRPMANARIYLLDEQHRPVPIGVAGELYVGGAGVARGYLNRPQLTAERFLDDPFSNEPGARMYRTGDLGRWLADGRIEYLGRNDHQVKIR	GAGGCCCAGGCAGCACGTGCGCCACAGGCGCTGGCGGCCTGCCACCAGGGGCGTTCGTTGAGCTATGCCGAGCTCAACCAGCAGGCCAATGGCCTGGCCCGCCAGTTGCGGGCCCTGGGCGTACGGCCCGAGGACCGGGTGGCCATCGTCGCCCGGCGGAGCCTGGAAACCCTGGTAGGCCTGCTGGCGATCCTCAAGTCCGGGGCCGGTTATGTGCCCATCGACCCGGCCCATCCGGCCGAGCGCTTGAGCTACCTGCTCGAAGACAGCGCCCCCCGGGTAGTGCTGGCCCAGGCGGAGCTGTTGTCGCGCTTGGCGCCCCAAGCGGTACCGGTGCTGGAGCTGGACCCGCGACACTGGCAGGAGCAGGGCCAGGACAACCTGGAGGTACCGGGGTTG…	CCCCCCCCCCCC(O)CC(=O)NC(CC(C)C)C(=O)NC(CCC(O)=O)C(=O)NC1C(C)OC(=O)C(NC(=O)C(CO)NC(=O)C(CC(C)C)NC(=O)C(CC(C)C)NC(=O)C(CO)NC(=O)C(CC(C)C)NC(=O)C(NC1=O)C(C)C)C(C)C	['Structure-based inference']	['pubmed:24673852']
BGC0000398	NRP	Pseudomonas sp. CMR12a	orfamide B	nrpspksdomains_ofaC_AMP-binding.2	leucine	leu	FAAQVAQQPEATAVQAGDARLSYAELDARANRLAHHLRGLGVGPDSRVAICVGRGPDMAVGLLAILKAGGAYVPIDPAHPAERIAYLLQDSAPLAVLVQGATRALIGAAQRPLVDLDDLAWQQQPASAPPVPGLHAGHLAYVIYTSGSTGQPKGVMVEHQSLANLVHWHCQAFDLGPGRHTSSVAGFGFDAMAWELWPALCNGATLHLPPAGIDHQDIDQLLAWWRAQPLDVSFLPTPVAEHAFSQEQKHPTLRTLLIGGDRLRQFDQAQSFTLVNNYGPTEATVVATSGALVAGGLLDIGRPMANVRIYLLDEQCQPVPIGVAGELYVGGAGVARGYLNRPELTAERFLDDPFSDAPGARMYRTGDLARWLGDGRIEYLGRNDQQVKIR	TTTGCCGCCCAGGTCGCGCAGCAACCCGAGGCCACGGCGGTGCAAGCCGGGGACGCGCGCCTCAGTTATGCCGAGCTGGATGCCCGGGCCAATCGCCTGGCCCACCATTTGCGCGGGCTGGGCGTCGGGCCGGACAGCCGGGTGGCGATCTGTGTCGGGCGCGGGCCGGACATGGCCGTGGGCCTGCTGGCGATCCTCAAGGCCGGTGGTGCCTATGTGCCCATCGACCCGGCCCATCCGGCCGAGCGCATCGCCTACCTGTTGCAGGACAGCGCGCCACTGGCGGTCTTGGTGCAGGGCGCGACCCGGGCATTGATCGGTGCTGCGCAACGGCCGCTGGTCGATCTCGACGACCTGGCCTGGCAACAACAACCGGCCAGCGCACCACCGGTACCCGGG…	CCCCCCCCCCCC(O)CC(=O)NC(CC(C)C)C(=O)NC(CCC(O)=O)C(=O)NC1C(C)OC(=O)C(NC(=O)C(CO)NC(=O)C(CC(C)C)NC(=O)C(CC(C)C)NC(=O)C(CO)NC(=O)C(CC(C)C)NC(=O)C(NC1=O)C(C)C)C(C)C	['Structure-based inference']	['pubmed:24673852']
BGC0000398	NRP	Pseudomonas sp. CMR12a	orfamide B	nrpspksdomains_ofaC_AMP-binding.3	serine	ser	FEAQVLRSPEALAVQAGEQCLSYRQLNQQANQLAGHLLQLGVGPDQRVAICVERSVDMVVGLLAILKAGGAYVPIDPAYPAERIAYMLEDSAPLAVLAQGATLGLLGDPDVPVVDLEQSVWSRQPRINPRIAGLTPRHLAYVIYTSGSTGQPKGAMNEHRAVVNRLLWMQEQYRLTSCDAVLQKTPFSFDVSVWEFFWPLFTGARLVMARPEGHKDPAYLRQVIARENITTLHFVPSMLDVFLAYGETRECASLRQVMCSGEALPGSLVRRFKQQLPNVGLHNLYGPTEAAVDVTAWDCTGPLETTPDNTPIGKPIANTRLYLLDAQLQPVPLGVVGELFIAGVQVARGYLNREQLTAERFVDDPFSAEPDARMYRTGDLGRYLADGNIEYLGRNDDQV…	TTCGAAGCCCAGGTACTGCGCAGCCCAGAGGCGCTGGCGGTGCAGGCCGGCGAGCAGTGCCTGAGCTATCGCCAGCTCAACCAGCAGGCCAACCAGTTGGCCGGGCACCTGCTGCAATTGGGCGTCGGCCCGGACCAGCGGGTGGCCATCTGCGTCGAGCGCAGCGTCGACATGGTGGTAGGCCTGCTGGCGATCCTCAAGGCCGGGGGTGCCTACGTGCCCATCGACCCGGCTTACCCGGCCGAGCGTATCGCCTACATGCTTGAGGACAGCGCGCCGCTGGCGGTGCTGGCCCAGGGTGCGACCCTGGGCCTGCTGGGCGATCCGGACGTGCCAGTGGTGGATCTCGAACAATCGGTGTGGAGTCGCCAGCCCAGGATCAATCCACGGATCGCCGGG…	CCCCCCCCCCCC(O)CC(=O)NC(CC(C)C)C(=O)NC(CCC(O)=O)C(=O)NC1C(C)OC(=O)C(NC(=O)C(CO)NC(=O)C(CC(C)C)NC(=O)C(CC(C)C)NC(=O)C(CO)NC(=O)C(CC(C)C)NC(=O)C(NC1=O)C(C)C)C(C)C	['Structure-based inference']	['pubmed:24673852']
BGC0000398	NRP	Pseudomonas sp. CMR12a	orfamide B	nrpspksdomains_ofaC_AMP-binding.4	valine	val	FEAQVLERPQQVAAVHGQEVLSYARLNARANQLAHHLQGLGVLPGQAVALLLPRSLDLLVAQLAVSKCGAAYVPLDIHAPAERLGFMVADSQAVVLLVHSDRPLDVATPRVELDRLRLDRLPGHNPGLELSSEAVAYIMYTSGSTGEPKGVLVPHRAITRLVINNGYADFNVGDRVAFASNPAFDASTLDVWGPLLNGGRVVVVDHQTLLDPPAFAQLLQAYGVTMLFLTTSLFNQYVQLIPQALKGLRMLLCGGERADATAFRRMQAQAPGLRLVNGYGPTETTTFAVTHEPWELPADADSVPIGRPLSNTRVYVLDALGQPLPVGVVGEIHIGGDGVALGYLNRPELSAEKFLADPFSTEPGAMMYRTGDLGRWLDNGLLECIGRNDEQVKIR	TTCGAGGCGCAGGTCCTGGAGCGTCCGCAACAGGTGGCGGCAGTGCATGGCCAGGAGGTGCTCAGCTATGCCCGGCTCAATGCCCGGGCCAACCAGCTGGCCCATCACCTGCAGGGGCTTGGCGTGCTTCCCGGGCAGGCCGTGGCCTTGCTGTTGCCACGCAGCCTGGATCTGTTGGTGGCGCAATTGGCGGTCAGCAAGTGCGGTGCGGCCTATGTCCCGCTGGATATCCATGCCCCGGCCGAGCGGCTGGGCTTCATGGTGGCCGACAGCCAGGCGGTGGTCCTGCTGGTCCATAGCGATCGGCCGTTGGATGTAGCGACGCCACGGGTCGAGCTGGATCGGCTGCGCCTGGACCGGTTGCCGGGGCACAATCCCGGCCTGGAACTGTCCAGCGAA…	CCCCCCCCCCCC(O)CC(=O)NC(CC(C)C)C(=O)NC(CCC(O)=O)C(=O)NC1C(C)OC(=O)C(NC(=O)C(CO)NC(=O)C(CC(C)C)NC(=O)C(CC(C)C)NC(=O)C(CO)NC(=O)C(CC(C)C)NC(=O)C(NC1=O)C(C)C)C(C)C	['Structure-based inference']	['pubmed:24673852']
BGC0000399	NRP	Pseudomonas protegens Pf-5	orfamide A	nrpspksdomains_PFL_2145_AMP-binding.1	leucine	leu	AWARRTPQAIALVAQGQALSYEQLDRRANALALHLRELGVGPDARVAIVARRSPETLVGLLAILKAGAGYVPLDPAHPAERLAFLLHDSAPRAVLTQGALRQCLPTLNVPLIDLDNGQWLDGPGEIAEAAGLTAEHLAYVIYTSGSTGQPKGVMVEHQSLSNLVDWHGRAFDLQAGSHTSCLAGFGFDAMAWEVWPALCAGATLHLAPVSDGPEELDRLLAWWRAQPLEVSFLPTPVAEYALSQQLGHPTLRTLLIGGDRLRQLPADPGFAVINNYGPTEATVVATSGAIEAGQALHIGRPIANTRIYLLDEQQQLLPIGVPGELYVGGGGVARGYLNRDGMNAGRFLADPFSDRPGARMYRSGDLARWREDGSLEYLGRNDDQVKIR	GCCTGGGCCCGGCGCACGCCCCAGGCCATTGCCCTGGTCGCCCAGGGCCAGGCCCTCAGCTATGAACAGCTCGACCGCCGGGCCAACGCCCTGGCCCTGCACCTGCGCGAGCTGGGAGTGGGGCCGGATGCGCGGGTGGCCATTGTCGCCCGGCGCAGCCCGGAAACCCTGGTGGGGCTGCTGGCGATTCTCAAGGCCGGCGCGGGCTATGTGCCCCTGGACCCGGCCCATCCGGCTGAGCGCCTGGCCTTCCTGCTGCACGACAGCGCACCGCGGGCGGTGTTGACCCAGGGCGCCCTGCGCCAGTGCCTGCCGACGCTGAACGTGCCGCTGATCGACCTCGACAACGGCCAGTGGCTGGACGGCCCGGGCGAGATTGCCGAGGCCGCCGGGCTGACC…	CCCCCCCCCCCC(O)CC(=O)N[C@@H](CC(C)C)C(=O)N[C@H](CCC(O)=O)C(=O)N[C@@H]1[C@@H](C)OC(=O)[C@@H](NC(=O)[C@@H](CO)NC(=O)[C@H](CC(C)C)NC(=O)[C@H](CC(C)C)NC(=O)[C@@H](CO)NC(=O)[C@H](CC(C)C)NC(=O)[C@H](NC1=O)C(C)CC)C(C)C	['Structure-based inference', 'Sequence-based prediction']	['pubmed:17254952']
BGC0000399	NRP	Pseudomonas protegens Pf-5	orfamide A	nrpspksdomains_PFL_2145_AMP-binding.2	glutamic acid	glu	FEAQVRRTPEAIALQAGARQLSYRQLNQRANQLAHYLREQGVGPDVRVGLCVQRSPELLIGLLGILKAGGAYVPLDPDYPLERLRYLVQDSQPLAVLVHQPTRELLGPLPLSLIDFDRSTWEQAPQHDPVVAGLTVSHLAYVIYTSGSTGTPKGVMVEHRGLGNLMHWSSQLCGERARGTLLQKAPFSFDGSVWELFWPLVTGMRLLLARPDGQRDPLYLAQLVREEQVSMIKFVPAMLLQFLQLEEAGQCHSLTDVFCGGGELTEAIARLFRQRLPGARLHNVYGPTEATVDSSAWTLEPGAAVPPVQLPIGKAITNTRLYVLDAHDQPVPQGVSGQLHIGGVGVARGYLGLPQLQAERFIDSPFVAGDRLYRSGDRVRYNADGDLEFLGRNDFQVKLR	TTCGAAGCCCAGGTGCGGCGCACGCCCGAGGCCATTGCACTGCAGGCCGGCGCGCGGCAACTGAGCTACCGGCAGCTCAACCAGCGCGCCAACCAGCTGGCCCATTACCTGCGCGAGCAGGGTGTGGGGCCGGATGTGCGAGTCGGGCTCTGCGTGCAGCGCAGCCCGGAACTGCTGATCGGCCTGTTGGGCATCCTCAAGGCCGGCGGTGCCTATGTGCCCCTGGACCCGGACTACCCGCTGGAGCGCCTGCGCTACCTGGTGCAGGACAGCCAGCCACTGGCGGTGCTGGTGCACCAGCCGACCCGCGAGCTGCTGGGCCCGCTGCCCCTGTCGCTGATCGACTTCGACCGCAGTACCTGGGAGCAGGCGCCGCAGCATGATCCCGTGGTGGCAGGG…	CCCCCCCCCCCC(O)CC(=O)N[C@@H](CC(C)C)C(=O)N[C@H](CCC(O)=O)C(=O)N[C@@H]1[C@@H](C)OC(=O)[C@@H](NC(=O)[C@@H](CO)NC(=O)[C@H](CC(C)C)NC(=O)[C@H](CC(C)C)NC(=O)[C@@H](CO)NC(=O)[C@H](CC(C)C)NC(=O)[C@H](NC1=O)C(C)CC)C(C)C	['Structure-based inference', 'Sequence-based prediction']	['pubmed:17254952']
BGC0000399	NRP	Pseudomonas protegens Pf-5	orfamide A	nrpspksdomains_PFL_2146_AMP-binding.1	threonine	thr	EAQARVQPEAPALLFGELRLSYGELNRRANQVAHRLLALGVRPDQRVAICVERGVEMIVGLLGILKAGGAYVPIDPAYPRERIAYTLQDSDPVALLVQAGTQSLVADLRVPLIDLDSRTLAHEAQDDPEVPGLTPAHLAYVIYTSGSTGLPKGVMVEHRNVARLFSATRDWFDFNWRDVWALFHSFAFDFSVWEIWGALVHGGQLLVVPQAVSRSPDDCYRLLCEARVSILNQTPSAFRSLIAAQDQSPLKHSLRQVIFGGEALEPGMLKPWYAHLENVGTQLVNMYGITETTVHVTYRPLQAADAQLVGSSPIGRRIPDLQLYVLDAHREPLPSGVVGELYVGGAGVARGYLNRDQLTAERFIADPFSHEPGARLYKTGDLARWRSDGSLEYLGRNDD…	GAAGCCCAGGCCCGGGTCCAGCCCGAGGCCCCGGCGCTGCTGTTCGGCGAGCTGCGGCTGAGCTACGGCGAGCTCAACCGGCGCGCCAACCAGGTGGCCCACCGTTTGCTGGCGCTGGGCGTACGCCCGGACCAGCGGGTGGCGATCTGTGTCGAGCGCGGCGTGGAAATGATCGTCGGCCTGCTGGGCATCCTCAAGGCCGGCGGCGCCTACGTGCCCATCGACCCGGCCTACCCCCGCGAGCGCATCGCCTACACCCTGCAGGACAGCGACCCGGTGGCGCTGCTGGTGCAGGCCGGCACCCAGTCCCTGGTGGCCGACCTGCGGGTGCCGCTGATCGACCTCGACAGCCGCACCCTGGCCCATGAAGCCCAGGACGACCCCGAAGTGCCGGGGCTG…	CCCCCCCCCCCC(O)CC(=O)N[C@@H](CC(C)C)C(=O)N[C@H](CCC(O)=O)C(=O)N[C@@H]1[C@@H](C)OC(=O)[C@@H](NC(=O)[C@@H](CO)NC(=O)[C@H](CC(C)C)NC(=O)[C@H](CC(C)C)NC(=O)[C@@H](CO)NC(=O)[C@H](CC(C)C)NC(=O)[C@H](NC1=O)C(C)CC)C(C)C	['Structure-based inference', 'Sequence-based prediction']	['pubmed:17254952']
BGC0000399	NRP	Pseudomonas protegens Pf-5	orfamide A	nrpspksdomains_PFL_2146_AMP-binding.2	isoleucine	ile	FEAQAQAHPQRVAAVEGQAQLSYGELNTRANQLARHLLELGLQPGDRVAILLPRSLDLLVSQLAVCKCAAAYVPLDINAPAQRQAFMVEDSASVLLLSRSDQVLACPARRVDLDRLQLAPLPGHNPDLAQSSETVAYIMYTSGSTGVPKGVQVPHRAISRLVLNNGYADFNPEDRVAFASNPAFDASTMDVWGALLNGGRVLVIDHYTLLEPARFGRALSTAGATVLFVTTALFNQYVQLIPEALKGLRILLCGGERADPAAFRRLLALAPRLRLVHCYGPTETTTYATTHEVTALADDAEHVPIGRPIGNTRVYVLDAQQRPLPIGAPGEIVIGGDGVALGYLNRPELNAEKFIRDPFSEQPGALLYRTGDIGRWLGNGLLECLGRNDDQVKIR	TTCGAGGCCCAGGCCCAGGCCCACCCGCAGCGGGTGGCGGCGGTCGAAGGCCAGGCGCAGCTCAGCTACGGCGAGCTCAATACCCGGGCCAACCAGTTGGCCCGGCACCTGCTGGAGCTCGGGCTGCAGCCCGGCGACCGGGTGGCGATCCTGCTGCCCCGGTCCCTGGACCTGCTGGTGAGCCAACTGGCCGTCTGCAAATGCGCCGCGGCCTATGTGCCCCTGGATATCAACGCCCCGGCCCAGCGCCAGGCCTTCATGGTGGAAGACAGCGCCAGCGTGCTGCTGCTCAGCCGCAGCGACCAGGTGCTTGCGTGCCCGGCCAGAAGGGTCGACCTGGACCGCCTGCAACTGGCGCCATTGCCCGGGCACAACCCGGACCTGGCGCAGTCGTCCGAG…	CCCCCCCCCCCC(O)CC(=O)N[C@@H](CC(C)C)C(=O)N[C@H](CCC(O)=O)C(=O)N[C@@H]1[C@@H](C)OC(=O)[C@@H](NC(=O)[C@@H](CO)NC(=O)[C@H](CC(C)C)NC(=O)[C@H](CC(C)C)NC(=O)[C@@H](CO)NC(=O)[C@H](CC(C)C)NC(=O)[C@H](NC1=O)C(C)CC)C(C)C	['Structure-based inference', 'Sequence-based prediction']	['pubmed:17254952']
BGC0000399	NRP	Pseudomonas protegens Pf-5	orfamide A	nrpspksdomains_PFL_2146_AMP-binding.3	leucine	leu	FEARAAQAPDAVALVQGPLRLSYRQLNQQANQLARQLLELGVHPDDRVALCLQRGPHLLRGMLAVLKAGAAYVPIDPSLPAERIAYLLQDSAPLAVLVQSATRELPGSLAVVSIDLDGVAWQEAELGNPLLPHLTPAHLAYVIYTSGSTGLPKGVMVEHQSLENLVHWHCASFDLGPGRHSSSVAGLGFDAMAWEVWPTLCSGATLHLPPADVGSQDIEALLHWWRAQPLDVSFLPTPVAEYAFSQGLGHPTLDTLLIGGDRLRQFAADPGFAVINNYGPTEATVVASSGRIEAGSALHIGRPVANARLYLLDELQRPVPQGVSGELYVAGAGVARGYLNRPQMTAERFLNDPFSAEPEARMYRTGDLARWRADGNLDYLGRNDDQVKVR	TTCGAGGCGCGAGCGGCACAGGCTCCCGACGCCGTGGCGCTGGTGCAGGGGCCGTTGCGCCTGAGCTACCGCCAGCTCAACCAGCAGGCCAATCAGCTGGCCCGGCAACTGCTGGAGTTGGGCGTGCACCCAGACGATCGCGTGGCCCTGTGCCTGCAACGCGGGCCGCACTTGTTGCGGGGCATGCTGGCGGTCCTCAAGGCCGGGGCGGCCTATGTGCCCATCGACCCGAGCCTGCCGGCCGAACGCATCGCCTACCTGCTGCAGGACAGCGCGCCGCTGGCGGTGCTGGTACAAAGCGCCACCCGCGAGCTGCCGGGCAGCCTTGCGGTGGTGTCGATCGATCTCGATGGGGTTGCCTGGCAGGAGGCCGAGCTGGGCAACCCGCTTCTGCCGCAC…	CCCCCCCCCCCC(O)CC(=O)N[C@@H](CC(C)C)C(=O)N[C@H](CCC(O)=O)C(=O)N[C@@H]1[C@@H](C)OC(=O)[C@@H](NC(=O)[C@@H](CO)NC(=O)[C@H](CC(C)C)NC(=O)[C@H](CC(C)C)NC(=O)[C@@H](CO)NC(=O)[C@H](CC(C)C)NC(=O)[C@H](NC1=O)C(C)CC)C(C)C	['Structure-based inference', 'Sequence-based prediction']	['pubmed:17254952']
BGC0000399	NRP	Pseudomonas protegens Pf-5	orfamide A	nrpspksdomains_PFL_2146_AMP-binding.4	serine	ser	FEAQVRRSPEATAVQAGEQQLSYGELNRRANQLAGHLLQLGVGPDSRVAICVERGLEMVVGLLAILKAGGAYVPIDPGYPAERIAYMLDDSAPLAVLAQGATRALLGELARPLVDLDQLAWSGPAPGNPQVEGLTPGHLAYVIYTSGSTGQPKGAMNEHRAVVNRLLWMQAQYRLGTEDAVLQKTPFSFDVSVWEFFWPLFTGARLVMARPDGHKDPAYLRQVIREQGISTLHFVPSMLDVFLAQGEGAEDLGLRQVMCSGEALPGSLVRRFKQQLPQVALHNLYGPTEAAVDVTAWDCSGPLADTPDHTPIGKPIANTCIYLLDAQMQPVPLGVVGELYIGGVQVARGYLNREQLSAERFLKDPFSQEPGARLYRTGDLGRYQADGTIEYLGRNDDQV…	TTCGAGGCCCAGGTACGGCGCAGCCCCGAGGCCACTGCGGTACAGGCCGGCGAGCAGCAGCTGAGCTACGGCGAACTCAACCGGCGCGCCAACCAGCTGGCCGGGCACCTGCTGCAACTGGGCGTCGGCCCCGACAGCCGGGTGGCGATCTGTGTCGAGCGCGGGCTGGAAATGGTGGTCGGCCTGCTGGCGATCCTCAAGGCCGGCGGCGCCTATGTGCCCATCGACCCGGGCTACCCCGCCGAACGCATCGCCTACATGCTCGACGACAGCGCGCCCCTGGCGGTGCTGGCCCAGGGCGCGACCCGGGCATTGCTCGGCGAACTGGCGCGGCCCCTGGTGGACCTCGACCAGCTGGCCTGGAGCGGGCCGGCGCCGGGCAACCCGCAAGTAGAGGGG…	CCCCCCCCCCCC(O)CC(=O)N[C@@H](CC(C)C)C(=O)N[C@H](CCC(O)=O)C(=O)N[C@@H]1[C@@H](C)OC(=O)[C@@H](NC(=O)[C@@H](CO)NC(=O)[C@H](CC(C)C)NC(=O)[C@H](CC(C)C)NC(=O)[C@@H](CO)NC(=O)[C@H](CC(C)C)NC(=O)[C@H](NC1=O)C(C)CC)C(C)C	['Structure-based inference', 'Sequence-based prediction']	['pubmed:17254952']
BGC0000399	NRP	Pseudomonas protegens Pf-5	orfamide A	nrpspksdomains_PFL_2147_AMP-binding.1	leucine	leu	EAQAQRTPDALAACYQGRSLSYAELNQQANVLARQLRGLGVQPDDRVAIVARRSLETVVGLLAILKAGACYVPIDPAHPAERLNYLLQDCGPRAVLTQAELLGRLPALAVPVIELNQRLWLDQTADNTQVPGLSAANLAYVIYTSGSTGLPKGVMVEHRTLGNLVDWHCQAFDLRPGSQASCLAGFGFDAMAWEVWPALCVGATLHLAPAQDGSEDLDALLAWWRAQPLDVSFLPTPVAEYAFSQEQGHPSLRTLLIGGDRLRQFSHDQGFALINNYGPTEATVVASSGPIHAGGELDIGRPVANARIYLLDSQQRPVPIGVAGELYVGGAGVARGYLNRPQLTAERFLDDPFSDQPEARMYRSGDLARWLADGRIDYLGRNDDQVKIR	GAGGCCCAGGCGCAGCGCACCCCAGACGCCCTGGCGGCCTGCTACCAGGGCCGCTCGCTGAGCTATGCCGAGCTCAACCAACAGGCCAATGTCCTGGCCCGGCAACTGCGCGGGCTGGGGGTGCAGCCCGATGACCGGGTGGCCATCGTTGCCCGGCGCAGCCTGGAAACGGTGGTGGGCCTATTGGCGATTCTCAAGGCCGGGGCCTGCTATGTGCCCATCGACCCGGCCCACCCGGCCGAGCGTCTGAACTACCTGCTCCAGGACTGCGGCCCGCGGGCGGTGCTGACCCAGGCCGAGCTGCTGGGACGCCTGCCGGCCCTGGCGGTGCCGGTGATCGAACTCAACCAGCGGTTGTGGCTCGATCAGACGGCGGACAATACCCAGGTACCGGGGCTG…	CCCCCCCCCCCC(O)CC(=O)N[C@@H](CC(C)C)C(=O)N[C@H](CCC(O)=O)C(=O)N[C@@H]1[C@@H](C)OC(=O)[C@@H](NC(=O)[C@@H](CO)NC(=O)[C@H](CC(C)C)NC(=O)[C@H](CC(C)C)NC(=O)[C@@H](CO)NC(=O)[C@H](CC(C)C)NC(=O)[C@H](NC1=O)C(C)CC)C(C)C	['Structure-based inference', 'Sequence-based prediction']	['pubmed:17254952']
BGC0000399	NRP	Pseudomonas protegens Pf-5	orfamide A	nrpspksdomains_PFL_2147_AMP-binding.2	leucine	leu	FEAFAARQPEATALQVGAQRLSYGQLNARANQLAWHLRELGVGPDQRVAICVERGPGMVIGLLGILKAGGAYVPIDPGHPAERIAYLLQDSAPLALLVQGSTRALVGQPAMARVDLDQPEWQARPEGNLQVPGMSCAHLAYVIYTSGSTGLPKGVMVEHASLENLLDWHCQAFDLGPGRHASSVAGFGFDAMAWELWPTLCGGATLHLPPAGIGHQDLDQLLHWWQAQPLDLSFLPTPVAEYAFSQGLGHPTLRTLLIGGDRLRQFSQEPSFAVVNNYGPTETTVVASSGRLLAGGPLDIGRPIANARIYLLDPQQRPVPIGVAGELYVGGAGVARGYLNRPELTAERFLEDPFSTVPGARMYRSGDLARWRADGRIDYLGRNDDQVKVR	TTCGAGGCCTTTGCCGCTCGGCAGCCCGAGGCCACGGCCCTGCAGGTGGGCGCGCAGCGCCTGAGCTATGGCCAGTTGAATGCCCGGGCCAACCAACTGGCCTGGCACTTGCGGGAGCTGGGGGTGGGCCCGGATCAGCGGGTGGCGATCTGCGTCGAGCGCGGGCCGGGGATGGTGATCGGCCTGCTGGGGATTCTCAAGGCCGGTGGCGCCTATGTGCCCATCGACCCGGGTCACCCCGCGGAACGCATCGCCTACCTGCTGCAGGACAGCGCGCCGCTGGCGCTGCTGGTGCAGGGCAGCACCCGGGCCCTGGTGGGCCAACCGGCCATGGCCCGGGTGGACCTCGACCAGCCCGAGTGGCAGGCCCGCCCCGAGGGCAACCTGCAGGTGCCGGGC…	CCCCCCCCCCCC(O)CC(=O)N[C@@H](CC(C)C)C(=O)N[C@H](CCC(O)=O)C(=O)N[C@@H]1[C@@H](C)OC(=O)[C@@H](NC(=O)[C@@H](CO)NC(=O)[C@H](CC(C)C)NC(=O)[C@H](CC(C)C)NC(=O)[C@@H](CO)NC(=O)[C@H](CC(C)C)NC(=O)[C@H](NC1=O)C(C)CC)C(C)C	['Structure-based inference', 'Sequence-based prediction']	['pubmed:17254952']
BGC0000399	NRP	Pseudomonas protegens Pf-5	orfamide A	nrpspksdomains_PFL_2147_AMP-binding.3	serine	ser	FETQVLRSPEAIAVQAGEQQLSYRELNQQANQLAGHLLHLGVGPDSRVAICVERGLPMVVGLLGILKAGGAYVPIDPGYPAERIAYMLDDSAPQALLADSATRPLLGNLALPLVDLDQPQWHRQPRVNPRLNGLTPSHLAYVIYTSGSTGRPKGAMNEHRAVVNRLLWMQEQYRLTAEDAVLQKTPFSFDVSVWEFFWPLFTGARLVMARPDGHKDPAYLRQVIRDERISTLHFVPSMLDVFLAYGDTRECAGLRQVMCSGEALPGSLVRRFKQQLPQVALHNLYGPTEAAVDVTAWDCAGPLAQTPDNTPIGKPIANTRIYLLDAQMQPVPRGVVGELYIGGVQVARGYLNREQLSAERFLKDPFSQEPGARLYRTGDLARYLADGTIEYLGRNDDQV…	TTCGAGACCCAGGTGCTGCGCAGCCCCGAGGCCATCGCCGTGCAGGCCGGCGAGCAGCAGCTGAGCTACCGCGAGCTCAACCAGCAGGCCAACCAGCTGGCCGGGCACCTGCTGCACCTGGGCGTCGGCCCCGACAGCCGGGTGGCGATCTGCGTCGAGCGCGGGCTGCCCATGGTGGTGGGCCTGCTGGGCATCCTCAAGGCCGGCGGCGCCTACGTGCCCATCGACCCGGGCTACCCCGCCGAACGCATTGCCTACATGCTCGACGACAGCGCGCCCCAGGCGCTGCTGGCCGATAGCGCGACCCGGCCGCTGCTGGGCAACCTGGCGCTGCCCCTGGTGGATCTCGACCAGCCGCAATGGCACCGCCAGCCCCGGGTCAACCCGCGGCTCAACGGC…	CCCCCCCCCCCC(O)CC(=O)N[C@@H](CC(C)C)C(=O)N[C@H](CCC(O)=O)C(=O)N[C@@H]1[C@@H](C)OC(=O)[C@@H](NC(=O)[C@@H](CO)NC(=O)[C@H](CC(C)C)NC(=O)[C@H](CC(C)C)NC(=O)[C@@H](CO)NC(=O)[C@H](CC(C)C)NC(=O)[C@H](NC1=O)C(C)CC)C(C)C	['Structure-based inference', 'Sequence-based prediction']	['pubmed:17254952']
BGC0000399	NRP	Pseudomonas protegens Pf-5	orfamide A	nrpspksdomains_PFL_2147_AMP-binding.4	valine	val	FEEQVLARPQQVAAVQGAEQLSYIQLNTRANQLAQHLLQLGVQPGDHVALLLPRSLDLLVSQLAVSKCGAAYVPLDVNAPAERLGFMLADSGAPVLLSHSERVLEAAVQRVDLDRLRFDRLAGHNPNLALSSEAVAYVMYTSGSTGAPKGVRVPHRAITRLVINNGYADFNPEDRVAFASNPAFDASTLEVWGPLLNGGRVVVVDHATLLDPHAFGSLLERTGVSLLFLTTSLFNQYVQLVPQAFKGLRMLLCGGERADATAFRRIQAELPHLRLVNGYGPTETTTFAVTHEPGELAADADSVPIGRPLSNTRVYVLDALGQPLPVGVVGELYIGGDGVALGYLNRPDLSAQKFLIDPFHQQTQGTAAPALMYRTGDLGRWLENGLLECIGRNDEQVKIR	TTCGAGGAGCAGGTGCTGGCCCGGCCGCAGCAGGTGGCAGCGGTGCAGGGCGCCGAACAGCTCAGCTATATCCAGCTCAACACCCGGGCCAACCAACTGGCCCAGCATCTGCTGCAACTGGGGGTGCAGCCCGGGGATCATGTGGCGCTGCTGCTGCCGCGCTCCCTGGACCTGCTGGTGAGCCAACTGGCGGTGAGCAAGTGCGGCGCCGCCTATGTACCGCTGGACGTCAATGCCCCGGCCGAGCGCCTGGGGTTCATGCTGGCCGACAGCGGGGCGCCGGTGCTGCTCAGCCACAGCGAGCGGGTGCTGGAAGCTGCGGTGCAACGGGTCGACCTGGACCGTCTGCGCTTCGACCGGCTGGCCGGGCACAACCCGAACCTGGCGTTGTCGTCCGAG…	CCCCCCCCCCCC(O)CC(=O)N[C@@H](CC(C)C)C(=O)N[C@H](CCC(O)=O)C(=O)N[C@@H]1[C@@H](C)OC(=O)[C@@H](NC(=O)[C@@H](CO)NC(=O)[C@H](CC(C)C)NC(=O)[C@H](CC(C)C)NC(=O)[C@@H](CO)NC(=O)[C@H](CC(C)C)NC(=O)[C@H](NC1=O)C(C)CC)C(C)C	['Structure-based inference', 'Sequence-based prediction']	['pubmed:17254952']
BGC0000410	NRP	Pseudomonas fluorescens	pseudomonine	nrpspksdomains_ABS50184.1_AMP-binding.1	threonine	thr	NTKTALISGDRLISYAELGHSVCCIIGALKARGLSRGQVVAICLPRSPEHTMVTLACALTGVIWVPIDVSAPAERLRYLLENCQPDLVVIAQHESVGSVTATPAELLAVQTQAMPVLDDLSLSDAPAYYLYTSGTTGKPKCVVLNNRATANVVGSTLERWAVTERDVFMSVTPLHHDMSVFDVFGCLTAGATLVLTGCGEEKDAVRWNQLIAQHQVTLWCSVPAILEMLLSCRTSHDLKSLRLIAQGGDYIKPAVIAELRELLPSSRLISLGGPTETTIWSIWHEITDDDRALIPYGRPLPGNSYFVLDPRGEHCPAGVVGRIHTTGVNLALGYLENGELAQSEFVTVTDEHGQAVRAFRTGDCGRYRRDGTLIFDSRVNGYVKVR	AATACCAAAACTGCTCTTATCAGTGGTGATCGGCTAATCAGCTATGCCGAACTCGGCCACAGCGTGTGCTGCATCATCGGGGCATTGAAAGCGCGCGGATTATCACGTGGGCAAGTCGTCGCCATCTGCCTGCCTCGCAGCCCGGAACATACGATGGTGACGTTGGCGTGTGCTCTGACAGGCGTAATCTGGGTTCCCATCGACGTTTCAGCGCCGGCCGAGCGGTTGCGTTACCTGCTGGAAAACTGTCAGCCCGATCTTGTGGTGATTGCCCAGCATGAGTCTGTCGGCTCAGTCACGGCTACACCGGCGGAACTCTTGGCTGTGCAGACCCAGGCGATGCCCGTGCTGGATGACCTGTCGTTAAGCGACGCCCCGGCCTATTACCTTTATACCTCG…	CC1ON(CCC2=CNC=N2)C(=O)C1NC(=O)C1=CC=CC=C1O	['Structure-based inference', 'ATP-PPi exchange assay']	['pubmed:11222588']
BGC0000412	NRP	Pseudomonas aeruginosa PAO1	pyochelin	nrpspksdomains_pchE_AMP-binding.1	cysteine	cys	RAAEAPDADALLYRDQRVTRGELAERALRIAGGLREAGVRPGDAVEVSLPRGPQQVAAVFGVLAAGACYVPLDIDQPPARRRLIEEAAGVCLAITEEDDPQALPPRLDVQRLLRGPALAAPVPLAPQASAYVIYTSGSTGVPKGVEVSHAAAINTIDALLDLLRVNASDRLLAVSALDFDLSVFDLFGGLGAGASLVLPAQEQARDAAAWAEAIQRHAVSLWNSAPALLEMALSLPASQADYRSLRAVLLSGDWVALDLPGRLRPRCAEGCRLHVLGGATEAGIWSNLQSVDTVPPHWRSIPYGRPLPGQAYRVVDTHGRDVPDLVVGELWIGGASLARGYRNDPELSARRFVHDAQGRWYRTGDRGRYWGDGTLEFLGRVDQQVKVR	CGCGCCGCCGAGGCGCCGGATGCCGACGCGCTGCTCTATCGCGACCAACGTGTCACCCGCGGCGAACTGGCCGAGCGTGCGCTGCGCATCGCCGGCGGCCTGCGCGAAGCCGGGGTGCGCCCTGGCGACGCGGTCGAGGTCAGCCTGCCGCGCGGACCGCAGCAGGTCGCGGCGGTATTCGGCGTGCTCGCCGCAGGCGCCTGCTACGTGCCGTTGGACATCGACCAGCCGCCCGCACGGCGGCGCCTGATCGAAGAGGCCGCCGGGGTATGCCTGGCGATCACCGAGGAGGACGATCCGCAGGCCTTGCCGCCGCGCCTGGATGTCCAGCGCCTGCTGCGCGGCCCGGCGCTGGCCGCCCCCGTGCCGCTGGCGCCGCAGGCGAGTGCCTATGTGATC…	[H][C@@]1(CSC(=N1)C1=CC=CC=C1O)[C@@]1([H])SC[C@H](N1C)C(O)=O	[]	['pubmed:9846750', 'pubmed:11208777']
BGC0000412	NRP	Pseudomonas aeruginosa PAO1	pyochelin	nrpspksdomains_pchF_AMP-binding.1	cysteine	cys	FAERALLTPDATAIHDAAGSYSYRQVAQHASALRRVLEAHGAGRGRRVAVMLPKSAAQLVAVIGILQAGAAYVPVDIRQPPLRRQAILASAEVVALVCLESDVPDVGCACVAIDRLAADSAWPPPPAAEVAADDLAYVIYTSGSTGTPKGVMLSHAAVSNTLLDINQRYGVDANDRVLGLAELSFDLSVYDFFGATAAGAQVVLPDPARGSDPSHWAELLERHAITLWNSVPAQGQMLIDYLESEPQRHLPGPRCVLWSGDWIPVSLPTRWWRRWPDSAAVQPGRRTEAAIWSIEQPIRPQHTELASIPYGRALRGQSVEVLDARGRRCPPGVRGEIHIGGVGLALGYAGDPQRTAERFVRHPDGRRLYRTGDLGRYLADGSIEFLGREDDQVKIR	TTCGCCGAGCGTGCCCTGCTGACCCCCGACGCCACGGCGATCCACGATGCCGCCGGCAGCTACAGCTACCGCCAGGTCGCCCAGCACGCCAGCGCCCTGCGCCGCGTCCTGGAAGCGCACGGCGCGGGCCGTGGCCGGCGGGTCGCGGTGATGCTGCCGAAAAGCGCCGCGCAATTGGTCGCGGTGATCGGCATCCTCCAGGCCGGCGCCGCCTATGTGCCGGTGGACATCCGCCAGCCTCCGCTGCGGCGCCAGGCGATCCTCGCCAGCGCCGAAGTGGTCGCGCTGGTCTGCCTGGAAAGCGATGTCCCGGACGTCGGCTGCGCCTGCGTGGCCATCGACCGGCTGGCCGCCGACAGCGCCTGGCCGCCACCGCCCGCGGCGGAGGTGGCGGCGGAC…	[H][C@@]1(CSC(=N1)C1=CC=CC=C1O)[C@@]1([H])SC[C@H](N1C)C(O)=O	[]	['pubmed:9846750', 'pubmed:11208777']
BGC0000413	NRP	Pseudomonas protegens Pf-5	Pf-5 pyoverdine	nrpspksdomains_PFL_4093_AMP-binding.1	alanine	ala	EAQALKSPESEALLFAGQCLSYRELNARANRLAHKLIELGVGPEVRVGVALQRTPEMVVALLAVLKAGGAYVPLDPDYPQDRLAHMLRDSQAQILLTENALLSLLPSVESLQTLQLDAQPGWLDAYSPENPPQRATADNLAYVIYTSGSTGLPKGVAIAHRNVLALIDWSNRVYSTADLQGVLASTSICFDLSVWELFVTLSSGGSIVLARNALELPELADRDRVRLINTVPSAIAALQRSGQIPPSVRIINLAGEPLKQALVDSLYQQPGLVHVYDLYGPSEDTTYSTYTRREAGGQANIGRAISNTQSYILSPDLQPVPVGSAGELYLAGAGVTRGYLARPGLTAEKFVPNPFSSDGGRLYRTGDLTRYRADGVIEYIGRIDHQVKIR	GAAGCACAAGCACTGAAAAGCCCGGAGTCCGAGGCCCTGTTGTTCGCTGGCCAGTGCCTGAGCTACCGGGAACTCAATGCCCGGGCCAATCGCCTGGCGCACAAGCTGATCGAGCTGGGCGTGGGGCCTGAAGTGCGGGTGGGCGTGGCCTTGCAGCGCACCCCGGAAATGGTCGTGGCGCTGCTGGCGGTGCTCAAGGCCGGTGGCGCCTATGTGCCCTTGGACCCGGATTATCCACAGGATCGTCTGGCCCACATGCTGCGCGACAGTCAGGCGCAGATCCTGTTGACCGAAAACGCCTTGCTGTCGCTGCTGCCGTCCGTGGAATCCTTGCAGACCCTGCAACTGGATGCCCAGCCGGGTTGGCTGGACGCGTATTCGCCGGAAAATCCGCCGCAG…	C[C@@H]1NC(=O)[C@@H](NC(=O)[C@H](CCCCN)NC(=O)[C@@H](CCCN(O)C=O)NC(=O)[C@H](CC(=O)O)NC(=O)[C@@H]2CCNC3=C(NC(=O)CCC(=O)O)C=C4C=C(O)C(O)=CC4=[N+]32)[C@@H](C)OC(=O)[C@H](CCCCN)NC(=O)[C@@H](CCCN(O)C=O)NC(=O)[C@@H](C)NC1=O	['Structure-based inference']	['pubmed:8704959', 'pubmed:10383985']
BGC0000413	NRP	Pseudomonas protegens Pf-5	Pf-5 pyoverdine	nrpspksdomains_PFL_4093_AMP-binding.2	N5-formyl-N5-hydroxyornithine	orn	FADQAAKAPDAPAVFFAEQRLSYRELDTQANQLAHKLIELGVGPEVRVAIAMPRCAEIMVAFLAVLKAGGVYVPLDIEYPQDRLRYMMQDSGAWLLLTQNHLLDRLPIPEGLPTLSVEGAADFAAYPVTSPQVDLAEENLAYVIYTSGSTGLPKGVAVSHGPLAMHSLATGERYEMSPADCELHFMSFAFDGSHEGWMHPLIYGASVLIRDDSLWSPEFTYEQMHRYGVTVGVFPPVYLQQLAVHAERDGNPPAVRVYCFGGDAVPQASYDLAWRVLRPKYIFNGYGPTETVVTPLIWKAKAGDPCDAAYAPIGNIVGNRSAYVADANLNLLPVGVAGELYLGGLGVARGYLDRPGLTAERFIPDPYSTAGARLYRSGDLTRYRTDGLVEYVGRVDHQV…	TTTGCCGATCAGGCGGCCAAGGCGCCGGATGCCCCGGCGGTGTTCTTCGCCGAGCAGCGCCTGAGCTATCGCGAGCTGGATACTCAAGCCAACCAGCTGGCGCACAAGTTGATCGAGCTGGGCGTTGGCCCGGAAGTGCGGGTGGCCATCGCCATGCCGCGTTGCGCGGAAATCATGGTGGCCTTCCTTGCCGTGCTCAAGGCCGGCGGGGTCTATGTGCCGCTGGATATCGAATACCCCCAGGACCGTCTGCGCTACATGATGCAGGACAGCGGCGCTTGGCTGCTGCTGACCCAGAACCATCTGCTGGATCGCTTGCCGATTCCTGAGGGGCTGCCGACCCTCAGCGTCGAAGGTGCGGCTGATTTTGCGGCTTACCCTGTGACCAGTCCGCAGGTG…	C[C@@H]1NC(=O)[C@@H](NC(=O)[C@H](CCCCN)NC(=O)[C@@H](CCCN(O)C=O)NC(=O)[C@H](CC(=O)O)NC(=O)[C@@H]2CCNC3=C(NC(=O)CCC(=O)O)C=C4C=C(O)C(O)=CC4=[N+]32)[C@@H](C)OC(=O)[C@H](CCCCN)NC(=O)[C@@H](CCCN(O)C=O)NC(=O)[C@@H](C)NC1=O	['Structure-based inference', 'Homology']	['pubmed:8704959', 'pubmed:10383985']
BGC0000413	NRP	Pseudomonas protegens Pf-5	Pf-5 pyoverdine	nrpspksdomains_PFL_4093_AMP-binding.3	lysine	lys	EAQAARTPDAVALLCAGEQLSYGQFNQRANQLAHKLIEQGVGPDVRVGIAVERGLDMIVGLLAVLKAGGAYVPLDPEYPQERLHYMMQDSGIQLLLTQSPLLERLQDGLAVPYLCLDQAPVWLAGMAQGNPPERSSAENLAYVMYTSGSTGRPKGVGITHNALSQHARATASHFNMTATDRGLQFSTFNFDAFVEQLYPALIRGASVVIRGKALWDSETFYRELIEQGISIVDLSTAYWFMLGKDFAAKGPRDFGRLRQLNLGGEAMPAEGVAAWKQAGLKHACLLNTYGPTEATVSATAHDCGAYLKGTEPLPAVIPLGKALPGRSIYLLDSSGNLPLNGVMGELMIGGDLLARGYHDRPGLTAERFIPDPFSSDGGRLYRSGDLARYDAEGVIEYAG…	GAAGCCCAGGCCGCGCGCACTCCGGATGCCGTGGCGCTGCTGTGCGCCGGTGAGCAACTGAGCTATGGCCAGTTCAACCAGCGGGCCAACCAGTTGGCCCATAAGCTGATCGAGCAGGGTGTAGGCCCGGATGTGCGGGTGGGCATTGCCGTGGAGCGCGGGCTGGACATGATTGTCGGCCTGCTGGCGGTGCTCAAGGCCGGTGGCGCCTACGTGCCGCTGGACCCCGAGTACCCCCAGGAGCGCCTGCACTACATGATGCAGGACAGCGGCATCCAGTTGCTGCTGACCCAGTCGCCGCTGCTGGAGCGTTTGCAGGATGGCCTCGCGGTGCCGTACCTGTGCCTGGACCAGGCTCCCGTCTGGCTGGCCGGTATGGCGCAGGGCAACCCGCCTGAG…	C[C@@H]1NC(=O)[C@@H](NC(=O)[C@H](CCCCN)NC(=O)[C@@H](CCCN(O)C=O)NC(=O)[C@H](CC(=O)O)NC(=O)[C@@H]2CCNC3=C(NC(=O)CCC(=O)O)C=C4C=C(O)C(O)=CC4=[N+]32)[C@@H](C)OC(=O)[C@H](CCCCN)NC(=O)[C@@H](CCCN(O)C=O)NC(=O)[C@@H](C)NC1=O	['Structure-based inference']	['pubmed:8704959', 'pubmed:10383985']
BGC0000413	NRP	Pseudomonas protegens Pf-5	Pf-5 pyoverdine	nrpspksdomains_PFL_4094_AMP-binding.1	threonine	thr	EAQAARAPQAIALTFAGQSLDYQQLNERANRLAHKLIEQGVGPNVLVGLAVERSLEMVIGLLAILKAGGAYVPLDPAYPQDRLQHMMQDSAIALLLTQEHLLQGLPAFAGSTWLLEQPLDGYRVDNPEVGVTPEDLAYVIYTSGSTGKPKGTLQPHHNVLRLFAATEQWFQFGAEDVWSLFHSYAFDFSVWEIFGALLYGGRLLIVPQEVARSAQDFYPLLCSEGVTVLNQTPSAFRQLMHVACSAEPAHRLRYIVFGGEALEVNTLQPWFQRFGDQRPQLVNMYGITETTVHVTYRPLSVADLSLTGASPIGELIPDMAWYLLDGNLQPVPKGCIGELYVGRAGLAWGYLNRGDLSAARFVPDPFGEAGGRLYRTGDLARYQADGSIGYIGRIDHQVK…	GAGGCTCAGGCCGCCAGGGCGCCCCAGGCCATTGCCCTGACCTTCGCCGGGCAGAGCCTGGACTACCAGCAGCTCAACGAGCGGGCCAACCGCCTGGCGCACAAGCTCATCGAGCAGGGCGTGGGCCCCAATGTACTGGTGGGGCTGGCGGTGGAGCGCAGCCTGGAGATGGTCATCGGCCTGCTGGCGATTCTCAAGGCCGGCGGTGCCTATGTGCCGCTGGACCCGGCCTATCCCCAGGACCGCCTGCAGCACATGATGCAGGACAGCGCCATCGCGTTGCTGCTGACCCAGGAGCATCTGCTGCAGGGCTTGCCGGCGTTTGCCGGCAGTACCTGGTTGCTGGAGCAGCCCCTGGACGGCTACCGGGTAGACAACCCCGAGGTCGGGGTGACGCCC…	C[C@@H]1NC(=O)[C@@H](NC(=O)[C@H](CCCCN)NC(=O)[C@@H](CCCN(O)C=O)NC(=O)[C@H](CC(=O)O)NC(=O)[C@@H]2CCNC3=C(NC(=O)CCC(=O)O)C=C4C=C(O)C(O)=CC4=[N+]32)[C@@H](C)OC(=O)[C@H](CCCCN)NC(=O)[C@@H](CCCN(O)C=O)NC(=O)[C@@H](C)NC1=O	['Structure-based inference']	['pubmed:8704959', 'pubmed:10383985']
BGC0000413	NRP	Pseudomonas protegens Pf-5	Pf-5 pyoverdine	nrpspksdomains_PFL_4094_AMP-binding.2	alanine	ala	EAQALKSPEAEALLFAGQSLSYRELNARANRLAHKLIELGVGPEVRVGVALQRTPEMVVALLAVLKAGGAYVPLDPDYPQDRLAHMLRDSQAQILLTENALLSLLPSVESLQTLQLDAQPGWLDAYSPENPPQRATADNLAYVIYTSGSTGLPKGVAIAHRNVLALIDWSNRVYSTADLQGVLASTSICFDLSVWELFVTLSSGGSIVLARNALELPELADRDRVRLINTVPSAIAALQRSGQIPPSVRIINLAGEPLKQALVDSLYQQPGLVHVYDLYGPSEDTTYSTYTRREAGGQANIGRAISNTQSYILSPDLQPVPVGSAGELYLAGAGVTRGYLARPGLTAEKFVPNPFSSDGGRLYRTGDLTRYRADGVIEYIGRIDHQVKIR	GAAGCACAAGCACTGAAAAGCCCGGAGGCCGAGGCCCTGTTGTTCGCTGGCCAGAGCCTGAGCTACCGGGAACTCAATGCCCGGGCCAACCGCCTGGCTCACAAGCTGATCGAGCTGGGCGTGGGGCCTGAAGTGCGGGTGGGCGTGGCCTTGCAGCGCACCCCGGAAATGGTCGTGGCGCTGCTGGCGGTGCTCAAGGCCGGTGGCGCCTATGTGCCCTTGGACCCGGATTATCCACAGGATCGTCTGGCCCACATGCTGCGCGACAGTCAGGCGCAGATCCTGTTGACCGAAAACGCCTTGCTGTCGCTGCTGCCGTCCGTGGAATCCTTGCAGACCCTGCAACTGGATGCCCAGCCGGGTTGGCTGGACGCGTATTCGCCGGAAAATCCGCCGCAG…	C[C@@H]1NC(=O)[C@@H](NC(=O)[C@H](CCCCN)NC(=O)[C@@H](CCCN(O)C=O)NC(=O)[C@H](CC(=O)O)NC(=O)[C@@H]2CCNC3=C(NC(=O)CCC(=O)O)C=C4C=C(O)C(O)=CC4=[N+]32)[C@@H](C)OC(=O)[C@H](CCCCN)NC(=O)[C@@H](CCCN(O)C=O)NC(=O)[C@@H](C)NC1=O	['Structure-based inference']	['pubmed:8704959', 'pubmed:10383985']
BGC0000413	NRP	Pseudomonas protegens Pf-5	Pf-5 pyoverdine	nrpspksdomains_PFL_4095_AMP-binding.1	aspartic acid	asp	FARQVAAQPEAPALVFAGQCLSYRELDLRASRLAAALVARGVGPEVPVGIAVERSLEMVLGLLAVLKAGGAYVPLDPQYPEQRLSYMLEDSGVRLLLSETAVQPRLPVAARVEVLLLDQAQAWAPDSDPLAALPGMAAGNLAYSIYTSGSTGAAKGVSITHGALANYVQAIIQRLPLGAARTMAVVSTIAADLGHTTLFGALCSGSCLHVIDLDTGLDADAFGAYLHTHQIDVLKIVPSHLQALMSGEEPARSLPRQCLVLGGEACPAALVRRIATLAPECAVFNHYGPTETTVGALTMAAATLADERAVVPLGLPLANVRARVLDASLQPVAPGTPAELYLGGAGLARGYHQRAALTAERFVPDPFSGDGQRLYRTGDLARYLDGGVIDYLGRIDHQV…	TTTGCCCGCCAGGTCGCCGCGCAGCCCGAAGCACCGGCCCTGGTATTCGCCGGGCAGTGCCTGAGCTACCGCGAGCTGGACCTGCGTGCCAGCCGTCTGGCCGCAGCGCTGGTGGCGCGTGGCGTGGGGCCGGAAGTGCCGGTGGGTATCGCTGTGGAGCGTTCCCTGGAGATGGTGCTGGGCCTGTTGGCGGTGCTCAAGGCCGGCGGTGCCTATGTGCCCCTGGACCCGCAATACCCCGAACAGCGCTTGAGCTACATGCTTGAAGACAGCGGCGTACGCCTGCTGCTGAGCGAGACGGCGGTGCAGCCGCGGCTGCCGGTGGCGGCCCGGGTCGAGGTGCTGTTGCTGGATCAGGCACAGGCCTGGGCGCCGGACAGCGATCCGCTGGCAGCCTTG…	C[C@@H]1NC(=O)[C@@H](NC(=O)[C@H](CCCCN)NC(=O)[C@@H](CCCN(O)C=O)NC(=O)[C@H](CC(=O)O)NC(=O)[C@@H]2CCNC3=C(NC(=O)CCC(=O)O)C=C4C=C(O)C(O)=CC4=[N+]32)[C@@H](C)OC(=O)[C@H](CCCCN)NC(=O)[C@@H](CCCN(O)C=O)NC(=O)[C@@H](C)NC1=O	['Structure-based inference', 'Homology']	['pubmed:8704959', 'pubmed:10383985']
BGC0000413	NRP	Pseudomonas protegens Pf-5	Pf-5 pyoverdine	nrpspksdomains_PFL_4095_AMP-binding.2	N5-formyl-N5-hydroxyornithine	orn	FADQAAKAPDAPAVFFAEQRLSYRELDTQANQLAHKLIELGVGPEVRVAIAMPRCAEIMVAFLAVLKAGGVYVPLDIEYPQDRLRYMMQDSGAWLLLTQSHLLDRLPIPDGLPTLSVERAADFAGYPASAPQVDLAEENLAYVIYTSGSTGLPKGVAVSHGPLAMHSLATGERYEMSPADCELHFMSFAFDGSHEGWMHPLIYGASVLIRDDSLWSPEFTYEQMHRYGVTVGVFPPVYLQQLAVHAERDGNPPAVRVYCFGGDAVPQASYDLAWRVLRPKYIFNGYGPTETVVTPLIWKAKAGDPCDAAYAPIGNIVGNRSAYVADANLNLLPVGVAGELYLGGLGVARGYLDRPGLTAERFIPDPYSTTGARLYRSGDLTRYRTDGLVEYVGRVDHQV…	TTTGCCGATCAGGCGGCCAAGGCGCCGGACGCCCCGGCGGTGTTTTTCGCCGAGCAGCGCTTGAGCTATCGCGAGCTGGATACTCAAGCCAACCAGCTGGCGCACAAGTTGATCGAACTGGGCGTTGGCCCGGAAGTGCGGGTGGCCATCGCCATGCCGCGCTGCGCGGAAATCATGGTGGCCTTCCTGGCCGTGCTCAAGGCCGGTGGGGTTTATGTGCCGCTGGATATCGAGTACCCCCAGGACCGCCTGCGCTACATGATGCAAGACAGCGGCGCGTGGCTGCTGCTGACCCAGAGCCACCTGCTGGATCGCTTGCCGATCCCCGATGGCCTGCCGACCTTGTCGGTGGAACGGGCCGCAGATTTTGCCGGCTACCCCGCCAGTGCCCCGCAGGTG…	C[C@@H]1NC(=O)[C@@H](NC(=O)[C@H](CCCCN)NC(=O)[C@@H](CCCN(O)C=O)NC(=O)[C@H](CC(=O)O)NC(=O)[C@@H]2CCNC3=C(NC(=O)CCC(=O)O)C=C4C=C(O)C(O)=CC4=[N+]32)[C@@H](C)OC(=O)[C@H](CCCCN)NC(=O)[C@@H](CCCN(O)C=O)NC(=O)[C@@H](C)NC1=O	['Structure-based inference', 'Homology']	['pubmed:8704959', 'pubmed:10383985']
BGC0000413	NRP	Pseudomonas protegens Pf-5	Pf-5 pyoverdine	nrpspksdomains_PFL_4095_AMP-binding.3	lysine	lys	EAQAARTADAVALLCAGQQLSYGQFNQRANQLAHKLIEQGVGPDVRVGIAVERGLDMIVGLLAVLKAGGAYVPLDPEYPQERLHYMMQDSGIQLLLTQSPLLERLRDGVEVPHLCLDQQGLDGYSLNNPAPRAQADNLAYVMYTSGSTGRPKGVDISHRALTQHAQVSRDYFNMSAADRGLQFSTFNFDAFVEQLYPALICGASVVIRGKALWDSETFYRELIEQGISIVDLSTAYWFMLGKDFASREPRDFGRLRQLNLGGEAMPAEGVAAWKKAGLKHACLLNTYGPTEATVSVTAHDCSRYLQDGQALPSQMPLGKGLPGRSIYLLDNSGNLTLSGATGELMIGGELLARGYHDRPGLTAERFIPDPFSSDGGRLYRSGDLARYDAEGVIEYAGRI…	GAGGCCCAGGCCGCACGCACTGCGGATGCCGTGGCGCTGCTGTGCGCCGGCCAGCAACTGAGCTATGGCCAGTTCAACCAGCGGGCCAACCAGTTGGCCCATAAGCTGATCGAGCAGGGTGTAGGCCCGGATGTGCGGGTGGGCATTGCCGTGGAGCGCGGGCTGGACATGATTGTCGGCCTGCTGGCGGTGCTCAAGGCCGGTGGCGCCTACGTGCCGCTGGACCCCGAGTACCCCCAGGAGCGCCTGCACTACATGATGCAGGACAGCGGCATCCAGCTGCTGCTGACCCAGTCGCCGCTGCTGGAACGCCTGCGCGACGGGGTGGAGGTACCCCACCTGTGCCTGGATCAGCAGGGCCTGGACGGCTACTCCCTGAACAATCCAGCGCCGCGGGCC…	C[C@@H]1NC(=O)[C@@H](NC(=O)[C@H](CCCCN)NC(=O)[C@@H](CCCN(O)C=O)NC(=O)[C@H](CC(=O)O)NC(=O)[C@@H]2CCNC3=C(NC(=O)CCC(=O)O)C=C4C=C(O)C(O)=CC4=[N+]32)[C@@H](C)OC(=O)[C@H](CCCCN)NC(=O)[C@@H](CCCN(O)C=O)NC(=O)[C@@H](C)NC1=O	['Structure-based inference']	['pubmed:8704959', 'pubmed:10383985']
BGC0000413	NRP	Pseudomonas protegens Pf-5	Pf-5 pyoverdine	nrpspksdomains_PFL_4189_AMP-binding.1	glutamic acid	glu	HEQLRQSPERTALVWDGGQLGFAELHAQANRLAHYLRDKGVGPDVCVAIAAERSPQLLIGLLAIIKAGGAYVPLDPDYPAERLAYMLGDSGVQLLLTQTHLLGRMPEAPGVSAIAMDSLKLDSWPSHAPGLHLHGEHLAYVIYTSGSTGQPKGVGNTHRALMERLQWMQDSYQLQADDVLMQKAPISFDVSVWECFWPLITGCRLLIAAPGEHRDPHRIAQLVQEYGVTTLHFVPPLLQLFVDEPLSAECHSLRRVFSGGEALPAELRNRLLQQLPNAQLHNRYGPTETAINVTHWQCSVDDGERSPIGRPLGNVLCRVLDAELNLMPAGVPGELCISGQGLARGYLGRPALTAERFVVDPLSEEGARLYRTGDRVRWCADGVLEYLGRLDQQVKLR	CACGAACAACTGCGCCAGAGCCCGGAACGCACCGCGCTGGTCTGGGACGGCGGCCAGCTGGGCTTTGCCGAACTGCACGCCCAGGCCAACCGCCTGGCCCATTACCTGCGGGACAAGGGGGTCGGCCCGGACGTGTGCGTGGCCATCGCCGCCGAACGTTCGCCGCAACTGCTGATCGGCCTTCTGGCAATCATCAAGGCCGGTGGCGCCTACGTGCCCCTGGACCCGGACTACCCCGCCGAACGCCTGGCCTACATGCTCGGCGACAGCGGCGTGCAACTGCTGCTGACCCAGACCCATCTGCTGGGCCGGATGCCCGAAGCCCCGGGTGTCAGCGCCATCGCCATGGACAGCCTCAAGCTCGACAGCTGGCCGAGCCACGCGCCGGGCCTGCACCTG…	C[C@@H]1NC(=O)[C@@H](NC(=O)[C@H](CCCCN)NC(=O)[C@@H](CCCN(O)C=O)NC(=O)[C@H](CC(=O)O)NC(=O)[C@@H]2CCNC3=C(NC(=O)CCC(=O)O)C=C4C=C(O)C(O)=CC4=[N+]32)[C@@H](C)OC(=O)[C@H](CCCCN)NC(=O)[C@@H](CCCN(O)C=O)NC(=O)[C@@H](C)NC1=O	['Structure-based inference']	['pubmed:8704959', 'pubmed:10383985']
BGC0000413	NRP	Pseudomonas protegens Pf-5	Pf-5 pyoverdine	nrpspksdomains_PFL_4189_AMP-binding.2	tyrosine	tyr	FSEQALARKDAPALTFAGQTLSYSELDSRANRLAWMLRERGVGPQVRVGLALERSLEMVVGLLAILKAGGAYVPLDPEYPLDRLHYMIEDSGIGLLLSDARMFAALGELPISVGRWCLEEDGALLADYPAGELPFISLPQHQAYLIYTSGSTGQPKGVVVSHGEIAMHCQAVIRRFGMRADDCELHFYSINFDAATERLLVPLLSGAQVVLRAQGQWDAEEICQLIRQHRISILGFTPSYGSQLAQHLATQQQTLPVRMCITGGEALTGEHLQRIRAAFQPSLFFNAYGPTETVVMPLASLAPEQLADGVASVPIGRIVGARVAYILDADLALVPQGATGELYVGGAGLAQGYHRRPGMSAERFVADPFATDGGRLYRTGDLVRQCADGQVEYIGRVDH…	TTCAGCGAACAGGCCCTGGCCCGCAAGGACGCACCGGCCCTGACCTTCGCCGGACAGACCCTGAGCTACAGCGAACTGGACAGCCGCGCCAACCGCCTGGCCTGGATGCTTCGCGAGCGTGGCGTGGGCCCGCAAGTGCGGGTCGGCCTGGCCCTGGAGCGCTCCCTGGAAATGGTCGTCGGCCTGCTGGCGATCCTCAAGGCCGGTGGCGCCTACGTGCCCCTGGACCCGGAATACCCCCTGGATCGCCTGCACTACATGATCGAGGACAGCGGCATCGGCCTGCTCCTCAGCGATGCGCGGATGTTCGCCGCCCTGGGTGAGTTGCCCATCAGTGTAGGCCGCTGGTGCCTGGAGGAAGACGGCGCGCTGCTGGCCGACTACCCGGCCGGCGAATTG…	C[C@@H]1NC(=O)[C@@H](NC(=O)[C@H](CCCCN)NC(=O)[C@@H](CCCN(O)C=O)NC(=O)[C@H](CC(=O)O)NC(=O)[C@@H]2CCNC3=C(NC(=O)CCC(=O)O)C=C4C=C(O)C(O)=CC4=[N+]32)[C@@H](C)OC(=O)[C@H](CCCCN)NC(=O)[C@@H](CCCN(O)C=O)NC(=O)[C@@H](C)NC1=O	['Structure-based inference']	['pubmed:8704959', 'pubmed:10383985']
BGC0000413	NRP	Pseudomonas protegens Pf-5	Pf-5 pyoverdine	nrpspksdomains_PFL_4189_AMP-binding.3	2,4-diaminobutyric acid	dab	FEAQVAAHPQRIAASCLDQRYSYAELNRCSNRLGHALVANGVGFDQPVALLAERGLELLGMIIGSFKAGAGYLPLDPGLPGQRLGRIIELSRTPILVCTAACREQAQALLDEFGCAGRPRLLVWEELQAAGHAEHNPGRYSAPDNLAYVIYTSGSTGLPKGVMVEQRGMLNNQLSKVPYLHLSEADVIAQTASQSFDISVWQFLAAPLFGARVDIVPNTIAHDPQGLLAHVEEQGITVLESVPSLIQGMLAQDAIALDGLRWMLPTGEAMPPELAHQWLLRYPQVGLVNAYGPAECSDDVAFFRVDMASTRGAYLPIGTPTDNNQLYLMDEALELVPLGAVGELCVAGTGVGRGYVSDPLRTALAFVPHPFGAAGERLYRTGDLARRRSDGVLEYVGRI…	TTCGAGGCCCAGGTGGCGGCTCATCCGCAACGCATCGCCGCCAGTTGCCTGGACCAGCGTTACAGCTATGCCGAGTTGAACCGCTGCAGCAACCGCCTGGGCCACGCCCTGGTTGCCAACGGCGTGGGCTTTGATCAGCCGGTGGCCCTGCTGGCCGAGCGCGGCCTGGAACTCTTGGGCATGATCATCGGCAGCTTCAAGGCCGGGGCCGGCTACCTGCCCCTGGACCCGGGCCTGCCGGGCCAGCGCCTGGGCCGCATCATCGAGCTCAGCCGCACGCCGATCCTGGTCTGCACCGCGGCCTGCCGCGAACAGGCCCAGGCCCTGCTGGACGAGTTCGGCTGTGCCGGGCGTCCGCGGCTGCTGGTCTGGGAAGAGCTGCAAGCCGCCGGGCATGCC…	C[C@@H]1NC(=O)[C@@H](NC(=O)[C@H](CCCCN)NC(=O)[C@@H](CCCN(O)C=O)NC(=O)[C@H](CC(=O)O)NC(=O)[C@@H]2CCNC3=C(NC(=O)CCC(=O)O)C=C4C=C(O)C(O)=CC4=[N+]32)[C@@H](C)OC(=O)[C@H](CCCCN)NC(=O)[C@@H](CCCN(O)C=O)NC(=O)[C@@H](C)NC1=O	['Structure-based inference']	['pubmed:8704959', 'pubmed:10383985']
BGC0000421	NRP	Pseudomonas fluorescens	safracin A	nrpspksdomains_sfcA_AMP-binding.1	alanine	ala	FLRQVAITPDKPALRTPQASISYSELASRVARLSAALRVRGFKPEQTLAILLPRDINLVPALLAIMACGGSYVPLSDANPAELNRSILTRARCRAILTDQEGLTRFAHLAPCWSLSDLLSMPDAPLQDQSKLQAKAYILFTSGSTGEPKGVAITHANAANLLRWAALDCGPEYLAQTLAATPTTFDLSIFEMFAPLMVGGCVQPVSSVMALIDNPALLKGTTLINTVPSVADALLQHDVLVPSLRMLNLAGEPLNRDLYLRLQAKLTATRIVNLYGPTETTTYSTALVIEPAQQEITIGFPLYGTWVDVVDQNMQSVGIGVPGELIIHGHGVAQGYVSDPVRSAASFLPASDGLRCYRTGDRVRWLPDGRLDFIGREDDQVKVR	TTTCTCCGGCAAGTCGCCATCACGCCGGACAAGCCCGCGCTGCGTACGCCGCAGGCCAGCATCAGCTATAGCGAATTGGCCAGTCGAGTCGCCAGGCTCTCGGCAGCCTTGCGCGTACGCGGCTTCAAACCTGAACAGACCCTGGCAATACTCCTGCCTCGCGATATCAATCTGGTACCCGCTCTGCTGGCGATCATGGCCTGCGGTGGCAGTTATGTGCCACTCAGTGACGCGAACCCCGCCGAACTCAACCGTTCGATTCTGACCAGGGCCCGTTGCCGCGCGATTCTCACGGATCAGGAGGGTTTGACCCGTTTCGCTCACTTGGCGCCCTGCTGGTCCTTGAGCGACCTGCTGTCGATGCCCGACGCCCCGCTGCAGGACCAGTCCAAGCTTCAA…	CC1=C(C(=C2[C@H]3[C@@H]4CC5=C([C@@H](N4C[C@H](N3C)CC2=C1)CNC(=O)[C@H](C)N)C(=O)C(=C(C5=O)C)OC)O)OC	['Structure-based inference', 'Homology']	['pubmed:15773985']
BGC0000421	NRP	Pseudomonas fluorescens	safracin A	nrpspksdomains_sfcB_AMP-binding.1	glycine / 3-hydroxy-4-methoxyphenylalanine	gly	ADSHPNATALRDEQGELTYAQVCQQILQAAATLRAQGAKPGTLIAVIGERGNPWLIAMLAIWQVGGIYVPLSKDLPEQRLQGILAELEGAILITDDTTPERFRQRVTLPMHALWADGATHHERQTTDASRLSGYMMYTSGSTGKPKGVHVSQANLVATLSAFGQLLQVKPSDRMLALTTFSFDISLLELLLPLVQGASVQIAVAQAQRDAEKLAGYLADPRITLVQATPVTWRLLLSTGWQPRESLTLLCGGEALPQDLADRLCLPGMTLWNLYGPTETTIWSTACRLQPGAPVQLGHPIAGTQIALVDRNLRSVPRGVIGELLICGPGVSQGYYRNPVETAKRFVPDPHGSGKRAYLTGDRMRMQQDGSLAYIGRRDDQIKLR	GCAGACAGTCACCCCAATGCGACCGCGCTGCGTGACGAGCAAGGTGAACTGACCTATGCGCAAGTTTGCCAACAGATTCTGCAGGCAGCGGCCACTCTGCGAGCCCAGGGGGCGAAACCTGGAACCCTGATCGCGGTCATCGGCGAGCGCGGTAACCCCTGGTTGATCGCCATGTTGGCGATCTGGCAAGTCGGCGGTATCTATGTGCCATTGTCCAAGGACCTGCCCGAACAGCGCCTGCAAGGCATCCTGGCGGAACTCGAAGGGGCCATACTGATTACCGACGACACCACGCCGGAACGCTTCCGGCAACGTGTGACGCTGCCCATGCACGCCTTATGGGCCGATGGCGCAACGCATCACGAGCGGCAGACGACGGACGCCAGCCGGCTGTCTGGC…	CC1=C(C(=C2[C@H]3[C@@H]4CC5=C([C@@H](N4C[C@H](N3C)CC2=C1)CNC(=O)[C@H](C)N)C(=O)C(=C(C5=O)C)OC)O)OC	['Structure-based inference', 'Homology']	['pubmed:15773985']
BGC0000421	NRP	Pseudomonas fluorescens	safracin A	nrpspksdomains_sfcC_AMP-binding.1	3-hydroxy-O-methyltyrosine	tyr	TEKSPLAVAVIDHGQQLSYAELWARAALVAANISQHVAKPRSIIAVALPRSAEFIAALLGVVRAGHAFLPIDPRLPTDRIQFLIENSGCELVITSDQQSVEGWPQVARIRMEALDPDIRWVAPTGLSHSDAAYLIYTSGSTGVPKGVVVEHRQVVNNILWRQRTWPLTAQDNVLHNHSFSFDPSVWALFWPLLTGGTIVLADVRTMEDSTALLDLMIRHDVSVLGGVPSLLGTLIDHPFANDCRAVKLVLSGGEVLNPELAHKIQKVWQADVANLYGPTEATIDALYFSIDKNAAGAIPIGYPIDNTDAYIVDLNLNPVPPGVPGEIMLAGQNLARGYLGKPAQTAQRFLPNPFGNGRVYATGDLGRRWSSGAISYLGRRDQQVKIR	ACGGAAAAATCCCCGCTGGCGGTTGCGGTGATCGACCACGGCCAGCAGCTCAGCTATGCAGAGTTATGGGCAAGAGCTGCACTGGTAGCGGCGAACATCAGCCAGCATGTGGCAAAGCCTCGGAGCATCATCGCTGTAGCACTGCCCAGATCGGCTGAATTTATTGCAGCGCTGCTGGGGGTAGTGCGAGCAGGTCATGCGTTCTTGCCCATCGATCCCCGCCTGCCCACCGACCGCATCCAGTTCCTGATTGAAAACAGTGGCTGTGAGTTGGTCATTACCTCTGATCAGCAATCCGTGGAGGGTTGGCCGCAGGTCGCCAGGATACGAATGGAGGCGCTTGATCCAGACATTCGCTGGGTGGCGCCGACGGGGCTCAGCCACAGCGATGCCGCCTAC…	CC1=C(C(=C2[C@H]3[C@@H]4CC5=C([C@@H](N4C[C@H](N3C)CC2=C1)CNC(=O)[C@H](C)N)C(=O)C(=C(C5=O)C)OC)O)OC	['Structure-based inference', 'Homology']	['pubmed:15773985']
BGC0000425	NRP	Pseudomonas sp. CMR12a	sessilin A	nrpspksdomains_sesA_AMP-binding.1	threonine	thr	FEAQAASRPDATAVVFHEQRLSYAELNHRANRVAHRLLSLGVRPDDRVAICVERGLEMIVGLLGILKAGAGYVPIDPAYPQERISYTLQDSAPVAVLVQAATQALVAELTVPVIDLDATSLHQESIQDPHVAGLTAASLAYVIYTSGSTGLPKGVMIEHGNVTRLFTATDAWFSFNDQDVWALFHSFAFDFSVWEIWGALIHGGQLLVVPQVTSRSPDECYALLCSAGVTILNQTPSAFRSLIAAQGQSALKHSLRQVIFGGEALEPAILKPWYARMANGGTQLVNMYGITETTVHVTYRALEAADAQLVGTSPIGGRIPDLRLYVLDAQGRPVPHGVEGELYVGGAGVARGYLNRPELNAERFVHDPFDPTPGARMYRTGDLGRWQADGSIDYLGRND…	TTTGAAGCCCAGGCGGCTTCTCGACCCGATGCGACCGCCGTGGTTTTCCACGAGCAGCGCTTGAGCTACGCCGAATTGAACCATCGCGCGAACCGGGTGGCCCACCGACTGTTAAGCCTGGGTGTGCGCCCGGATGACCGGGTGGCGATCTGCGTTGAGCGCGGCCTGGAAATGATCGTCGGGCTGCTGGGCATCCTCAAGGCCGGCGCCGGTTATGTGCCGATCGACCCGGCGTACCCCCAGGAACGCATCAGTTACACCTTGCAGGACAGCGCGCCGGTAGCGGTGCTGGTGCAGGCGGCGACCCAGGCACTGGTGGCCGAACTCACGGTGCCGGTGATTGATCTGGACGCGACGAGCCTGCACCAGGAATCGATACAGGACCCGCACGTTGCAGGC…	O=C(N[C@@H]([C@@H](C)CC)C(N[C@@H](CCO)C(N[C@H](CCN)C(N[C@@H](CCCCN)C(O)=O)=O)=O)=O)[C@@H]([C@H](O)C)NC(/C(NC([C@@H](C(C)C)NC([C@H](CC(C)C)NC([C@@H](CCC(N)=O)NC([C@H](C(C)C)NC([C@@H](C(C)C)NC([C@@H](CC(C)C)NC([C@@H](CCC(N)=O)NC([C@@H](C(C)C)NC([C@@H](CC(C)C)NC([C@@H](CO)NC([C@]1(C(CC(O)CCCCC)=O)N(C(/C(N)=C/C)=O)CCC1)=O)=O)=O)=O)=O)=O)=O)=O)=O)=O)=O)=C\C)=O	['Structure-based inference']	['pubmed:24673852']
BGC0000425	NRP	Pseudomonas sp. CMR12a	sessilin A	nrpspksdomains_sesA_AMP-binding.2	proline	pro	FEAQALRQPDAIAVTYEGQALSYGQLNSLANRIAHRLVADGIGVNDRVAICAERGLEMVAGLLAILKAGAGYVPLDPAYPDERLAYMLHDSAPKALLTQQSLMPRFGTAGVPTLCLDNPAGIDAQPAHNPLVQGLQADALAYVIYTSGSTGQPKGVAMPHGPLVNLMQWQIAQTVADGREAQRTLQFAALGFDVAFQEVFSTLCAGGELSLIHGDVRLNFRQLFRHICEQRIQRLYLPCIALQALAEAVADEPELGALACALSDVITAGEQLRISAQMRALFQRLPGCRLHNHYGPTESHVTTALTLDGDAASWPVLPSIGVPVANTRIYLLDEQLQPVPLGVAGEIYIGGVCVARGYLHRDELTAERFLADPFVAGGRLYKTGDLGRYQPNGEIDYLG…	TTCGAGGCCCAGGCGCTGCGCCAGCCTGACGCCATTGCGGTGACGTACGAAGGGCAGGCCTTGAGCTACGGCCAATTGAACAGCCTGGCCAACCGCATTGCCCATCGCCTGGTCGCAGATGGCATCGGTGTGAATGATCGTGTGGCGATCTGCGCCGAGCGCGGCCTGGAAATGGTTGCCGGGTTGCTGGCGATTCTCAAGGCGGGCGCGGGCTACGTGCCGCTGGACCCGGCCTATCCGGACGAACGCCTGGCCTACATGCTCCACGACAGCGCGCCCAAGGCGCTCTTGACCCAGCAATCCCTCATGCCGCGTTTCGGCACGGCGGGTGTGCCCACCTTGTGTCTGGACAACCCGGCCGGCATCGACGCACAACCTGCGCACAACCCACTGGTGCAA…	O=C(N[C@@H]([C@@H](C)CC)C(N[C@@H](CCO)C(N[C@H](CCN)C(N[C@@H](CCCCN)C(O)=O)=O)=O)=O)[C@@H]([C@H](O)C)NC(/C(NC([C@@H](C(C)C)NC([C@H](CC(C)C)NC([C@@H](CCC(N)=O)NC([C@H](C(C)C)NC([C@@H](C(C)C)NC([C@@H](CC(C)C)NC([C@@H](CCC(N)=O)NC([C@@H](C(C)C)NC([C@@H](CC(C)C)NC([C@@H](CO)NC([C@]1(C(CC(O)CCCCC)=O)N(C(/C(N)=C/C)=O)CCC1)=O)=O)=O)=O)=O)=O)=O)=O)=O)=O)=O)=C\C)=O	['Structure-based inference']	['pubmed:24673852']
BGC0000425	NRP	Pseudomonas sp. CMR12a	sessilin A	nrpspksdomains_sesA_AMP-binding.3	serine	ser	FEAQVERTPEAIAVLADGQHLSYRELNAQANRLAHHLQAHGVQPDSPVAICVERSADMVVGLLAILKAGGAYVPLDPAYPQDRLAYMLEDSAPAVVLVQTATRALLGDIAVPVVDLDHAHWQHLPSSNPSVAALTPQHAAYVIYTSGSTGKPKGVINEHSAVVNRLLWMQEEYRLGADDTVLQKTPFSFDVSVWEFFWPLFTGARLVMARPGGHKDPQYLCDIIEAEQVTTLHFVPSMLDVFLAHGDVSQAAGLVRVMCSGEALPGSVVRRFKQQLPGSQLFNLYGPTEAAVDVTAWDCNAALAPDNTPIGKAIANTRMYVLDAHMQPVPLGVSGELYIGGVQVARGYLNRPDLTAERFLKDPFSEGRLYRTGDVGRFLADGNIEYLGRNDDQVKIR	TTCGAAGCCCAGGTTGAACGCACCCCCGAGGCCATTGCCGTGTTGGCCGACGGCCAGCACCTGAGCTACCGCGAGTTGAACGCCCAGGCCAACCGCCTGGCCCATCACCTGCAGGCGCACGGTGTGCAGCCGGATTCGCCGGTGGCGATTTGTGTCGAGCGCAGCGCCGACATGGTGGTCGGCCTGCTGGCGATCCTCAAGGCTGGCGGCGCGTATGTGCCGCTGGACCCGGCCTATCCGCAGGATCGCCTGGCCTACATGCTTGAAGACAGCGCCCCGGCTGTAGTACTGGTGCAAACCGCCACCCGCGCCTTGCTGGGTGACATCGCGGTACCGGTGGTGGATCTCGATCACGCCCACTGGCAGCACCTGCCGTCAAGCAACCCGTCGGTTGCCGCG…	O=C(N[C@@H]([C@@H](C)CC)C(N[C@@H](CCO)C(N[C@H](CCN)C(N[C@@H](CCCCN)C(O)=O)=O)=O)=O)[C@@H]([C@H](O)C)NC(/C(NC([C@@H](C(C)C)NC([C@H](CC(C)C)NC([C@@H](CCC(N)=O)NC([C@H](C(C)C)NC([C@@H](C(C)C)NC([C@@H](CC(C)C)NC([C@@H](CCC(N)=O)NC([C@@H](C(C)C)NC([C@@H](CC(C)C)NC([C@@H](CO)NC([C@]1(C(CC(O)CCCCC)=O)N(C(/C(N)=C/C)=O)CCC1)=O)=O)=O)=O)=O)=O)=O)=O)=O)=O)=O)=C\C)=O	['Structure-based inference']	['pubmed:24673852']
BGC0000425	NRP	Pseudomonas sp. CMR12a	sessilin A	nrpspksdomains_sesA_AMP-binding.4	leucine	leu	FEACAVQQPEAIAVRQGDAQLTYRQLDRRANQLAHSLLEHGVSPDDRVAICARRSLETLVGLLAILKAGAAYVPIDPAHPQERISYLLQDSAPQVVLAQSGTRDLLGDTDRPVIALDGDQWHHQPTSNPSVAGLTPTNLAYVIYTSGSTGLPKGVMVEHRTLENLVNWHCEAFDLHAGSHTSSVAGFGFDAMAWEIWPALCVGATLHLPPAQQAHEDIDALLSWWAAQPLDVSFLPTPVAEYALSQHLEHPTLKTLLVGGDRLRHFSTPQRFTLVNNYGPTEATVVATSGRIDAGRTLHIGRPIANTQVYVLDEHLQPVARGLTGELYVGGAGVARGYLNRPQMTAERFIQDPFSHAPDARLYRTGDLARWLEDGTLDYLGRNDDQVKIR	TTTGAAGCCTGCGCCGTGCAGCAGCCCGAGGCCATTGCCGTGCGCCAGGGCGATGCTCAACTGACGTACCGTCAGCTCGACAGACGTGCCAACCAGCTGGCGCACAGCCTGCTCGAACACGGCGTGAGCCCGGACGATCGGGTCGCCATCTGCGCCCGTCGCAGCCTCGAAACACTGGTGGGCCTGCTGGCGATCCTCAAGGCCGGTGCGGCTTACGTACCTATCGACCCGGCCCACCCGCAGGAACGCATCAGTTACCTGTTGCAGGACAGTGCCCCGCAGGTGGTTCTGGCCCAGTCAGGCACCCGCGACTTGTTGGGCGACACCGACAGGCCGGTGATCGCGCTGGACGGCGATCAGTGGCACCACCAGCCGACCAGCAACCCGAGCGTGGCCGGT…	O=C(N[C@@H]([C@@H](C)CC)C(N[C@@H](CCO)C(N[C@H](CCN)C(N[C@@H](CCCCN)C(O)=O)=O)=O)=O)[C@@H]([C@H](O)C)NC(/C(NC([C@@H](C(C)C)NC([C@H](CC(C)C)NC([C@@H](CCC(N)=O)NC([C@H](C(C)C)NC([C@@H](C(C)C)NC([C@@H](CC(C)C)NC([C@@H](CCC(N)=O)NC([C@@H](C(C)C)NC([C@@H](CC(C)C)NC([C@@H](CO)NC([C@]1(C(CC(O)CCCCC)=O)N(C(/C(N)=C/C)=O)CCC1)=O)=O)=O)=O)=O)=O)=O)=O)=O)=O)=O)=C\C)=O	['Structure-based inference']	['pubmed:24673852']
BGC0000425	NRP	Pseudomonas sp. CMR12a	sessilin A	nrpspksdomains_sesA_AMP-binding.5	valine	val	FEAQVVARAHAVAAVQGAVSMSYTQLNARANQLAHHLLGLGAAPGERVAILLERSLDLLVAQLAISKCAAVYVPLDVNAPADRQAFMIEDSGARWVLTTSATEVAGHRLDLDTLDLGEQPEHNPALEQSSETAAYIMYTSGSTGTPKGVLVPHRAITRLVINNGYAEFNPQDRVAFASNPAFDASTLDVWAPLLNGGAVVVVDQDTLLSREAFATLLQEQSISVLWMTAGLFHQYAEGLLPVFPQLRYLIVGGDVLDPSVIARVLKDGAPQHLLNGYGPTEATTFSTTHEITRADEGSIPIGKPVGNSRAYVLDARQQPVPVGVAGELYIGGQGVALGYLNRTDLTAHAFLVDPFNDGGLMYRTGDLVAWRADGTLQYLGRNDQQVKIR	TTTGAAGCTCAAGTGGTTGCGCGTGCGCACGCCGTGGCGGCGGTGCAGGGCGCGGTTTCAATGAGCTACACGCAACTGAACGCGCGGGCCAACCAACTGGCCCATCACCTGCTGGGCCTCGGCGCAGCGCCGGGTGAGCGGGTGGCGATCCTGCTGGAGCGCTCCCTGGATTTGCTGGTGGCGCAGTTGGCAATCAGCAAGTGCGCGGCGGTATATGTACCGCTGGACGTGAATGCCCCGGCAGATCGCCAAGCCTTCATGATCGAAGACAGCGGCGCCCGCTGGGTGTTGACCACCAGCGCGACCGAGGTGGCTGGCCACCGTCTGGACCTGGATACCCTTGATCTCGGCGAGCAGCCGGAACACAACCCGGCCCTGGAGCAGTCATCGGAAACCGCG…	O=C(N[C@@H]([C@@H](C)CC)C(N[C@@H](CCO)C(N[C@H](CCN)C(N[C@@H](CCCCN)C(O)=O)=O)=O)=O)[C@@H]([C@H](O)C)NC(/C(NC([C@@H](C(C)C)NC([C@H](CC(C)C)NC([C@@H](CCC(N)=O)NC([C@H](C(C)C)NC([C@@H](C(C)C)NC([C@@H](CC(C)C)NC([C@@H](CCC(N)=O)NC([C@@H](C(C)C)NC([C@@H](CC(C)C)NC([C@@H](CO)NC([C@]1(C(CC(O)CCCCC)=O)N(C(/C(N)=C/C)=O)CCC1)=O)=O)=O)=O)=O)=O)=O)=O)=O)=O)=O)=C\C)=O	['Structure-based inference']	['pubmed:24673852']
BGC0000425	NRP	Pseudomonas sp. CMR12a	sessilin A	nrpspksdomains_sesA_AMP-binding.6	glutamine	gln	EAQAARAPAAIAVVLGDQQLSYSDLNEQANRVAHYLRSLGAGADSCVAICMPRSLELIVGLLGILKSGAAYVPLDPEYPAQRLAFALQDSQPLAVLVQEASRGVLGDTAMPLIDLADAGVAEQPRANPPALATAHDLAYVIFTSGSTGRPKGVMVEHGSLVNHISWQTHAFGFDATDRFLQRTSVAFDASVWEIWTPLAIGARLVLLPAEASRDVEHMARTLVEQGVSVAQFVPSLLRLLVQLPETGIRCRYLFSGGEALDPQLAMQARALTTHGIVNLYGPTEATIDSTSWTFNESGPLDAVPIGKPIANARAYVLDAHLQLLPLGVAGELYIGGAGVARGYLGRDDLTAERFLADPFNPGGRLYKTGDLVRYLADGTLEYLGRNDDQIKLR	GAGGCCCAGGCCGCTCGGGCCCCGGCGGCGATTGCGGTGGTGCTGGGCGACCAGCAGTTGAGCTACAGCGACCTGAACGAGCAGGCCAACCGCGTCGCCCATTATTTGCGCAGCCTTGGCGCAGGCGCCGATAGCTGCGTGGCGATTTGCATGCCACGCAGCTTGGAGCTGATTGTCGGCTTGCTGGGCATCCTCAAATCCGGCGCTGCCTATGTGCCGCTGGACCCCGAATACCCGGCGCAACGCCTGGCGTTCGCCCTGCAGGACAGCCAGCCGCTGGCAGTGCTGGTGCAGGAGGCCAGCCGTGGCGTGCTGGGCGATACGGCCATGCCGTTGATTGACCTGGCGGATGCCGGGGTGGCCGAGCAGCCACGCGCCAATCCGCCCGCCCTGGCCACG…	O=C(N[C@@H]([C@@H](C)CC)C(N[C@@H](CCO)C(N[C@H](CCN)C(N[C@@H](CCCCN)C(O)=O)=O)=O)=O)[C@@H]([C@H](O)C)NC(/C(NC([C@@H](C(C)C)NC([C@H](CC(C)C)NC([C@@H](CCC(N)=O)NC([C@H](C(C)C)NC([C@@H](C(C)C)NC([C@@H](CC(C)C)NC([C@@H](CCC(N)=O)NC([C@@H](C(C)C)NC([C@@H](CC(C)C)NC([C@@H](CO)NC([C@]1(C(CC(O)CCCCC)=O)N(C(/C(N)=C/C)=O)CCC1)=O)=O)=O)=O)=O)=O)=O)=O)=O)=O)=O)=C\C)=O	['Structure-based inference']	['pubmed:24673852']
BGC0000425	NRP	Pseudomonas sp. CMR12a	sessilin A	nrpspksdomains_sesB_AMP-binding.1	leucine	leu	EQQAERSPEAPAVVYEGQTLSYAELNQQANHLAYRLIELGVQPDDRVAICARRSLETLVGLVAILKAGAAYVPVDPAHPPDRIGYLLEDSAPVVVLVQPGLTGRLPAMSVPVLELDRLLLAGPARANPQIAGLTPAHLAYVIYTSGSTGLPKGVMVEHQTLDNLVNWHCEAFNLNAGSHTSSVAGFGFDAMAWEVWPALCVGATLHLPPAAQGNEDIDALLTWWLAQPLDVSFLPTPVAEYAFSQNLQHPTLKTLLIGGDRLRQFTQAQRFTLVNNYGPTEATIVATSGVIEAGQPLHIGKPVANAQVYVLDAQLKPVPLGVAGELYVGGAGVARGYLNRAQMTAERFLKDPFSTDPQARMYRTGDLVRWLADGRLDYLGRNDDQVKIR	GAACAGCAGGCAGAACGCAGCCCCGAGGCGCCTGCGGTGGTGTACGAGGGCCAGACGCTGAGCTATGCCGAACTGAACCAGCAAGCCAACCACCTGGCTTATCGCCTGATCGAACTGGGCGTGCAGCCGGACGATCGCGTGGCGATCTGTGCGCGTCGCAGCCTGGAAACCCTGGTGGGTCTGGTCGCCATCCTCAAGGCCGGCGCGGCCTACGTACCCGTCGACCCGGCCCATCCACCGGACCGCATCGGCTACTTGCTCGAAGACAGCGCCCCGGTGGTGGTGCTGGTGCAACCGGGGCTGACCGGGCGCTTGCCAGCGATGAGCGTACCGGTACTCGAACTTGACCGCCTGTTGCTGGCAGGCCCCGCGCGCGCCAACCCACAGATTGCCGGCCTG…	O=C(N[C@@H]([C@@H](C)CC)C(N[C@@H](CCO)C(N[C@H](CCN)C(N[C@@H](CCCCN)C(O)=O)=O)=O)=O)[C@@H]([C@H](O)C)NC(/C(NC([C@@H](C(C)C)NC([C@H](CC(C)C)NC([C@@H](CCC(N)=O)NC([C@H](C(C)C)NC([C@@H](C(C)C)NC([C@@H](CC(C)C)NC([C@@H](CCC(N)=O)NC([C@@H](C(C)C)NC([C@@H](CC(C)C)NC([C@@H](CO)NC([C@]1(C(CC(O)CCCCC)=O)N(C(/C(N)=C/C)=O)CCC1)=O)=O)=O)=O)=O)=O)=O)=O)=O)=O)=O)=C\C)=O	['Structure-based inference']	['pubmed:24673852']
BGC0000425	NRP	Pseudomonas sp. CMR12a	sessilin A	nrpspksdomains_sesB_AMP-binding.2	valine	val	FEALVATQPQALAAVQDGQRLTYGELNNRANRLAHHLLGLGAAPGERVAILLERSLDLLVAQLAISKCAAVYVPLDVNAPADRQAFMIEDSGARWVLTTSATEVAGHRLDLDRLDLSAESEHNPSLEQSSETAAYIMYTSGSTGTPKGVLVPHRAITRLVINNGYAEFNPQDRVAFASNPAFDASTLDVWAPLLNGGAVVVVDQDTLLSRDAFATLLQEQSISVLWMTAGLFHQYAEGLLPVFPQLRYLIVGGDVLDPSVIARVLKDGAPQHLLNGYGPTEATTFSTTYEIQRADEGSIPIGKPVGNSRAYVLDARQQPVPVGVAGELYIGGQGVALGYLNRTDLTAHAFLVDPFNDGGLMYRTGDLVAWRADGTLQYLGRNDQQVKIR	TTCGAAGCGCTCGTGGCCACGCAGCCTCAGGCACTGGCCGCAGTGCAGGATGGGCAGCGACTGACCTATGGTGAACTGAACAACCGCGCCAACCGCCTGGCCCACCACCTGCTGGGCCTCGGCGCAGCGCCGGGTGAGCGGGTGGCAATCCTGCTGGAGCGTTCCCTGGATTTGCTGGTGGCGCAGTTGGCGATCAGCAAGTGCGCAGCGGTATATGTACCGCTGGACGTGAACGCCCCGGCAGATCGCCAAGCCTTCATGATTGAAGACAGCGGCGCCCGCTGGGTGCTGACCACCAGCGCGACCGAGGTGGCTGGCCATCGTCTGGACCTGGACCGCCTCGACCTGAGCGCGGAATCCGAGCACAACCCGAGCCTGGAACAGTCGTCGGAAACTGCG…	O=C(N[C@@H]([C@@H](C)CC)C(N[C@@H](CCO)C(N[C@H](CCN)C(N[C@@H](CCCCN)C(O)=O)=O)=O)=O)[C@@H]([C@H](O)C)NC(/C(NC([C@@H](C(C)C)NC([C@H](CC(C)C)NC([C@@H](CCC(N)=O)NC([C@H](C(C)C)NC([C@@H](C(C)C)NC([C@@H](CC(C)C)NC([C@@H](CCC(N)=O)NC([C@@H](C(C)C)NC([C@@H](CC(C)C)NC([C@@H](CO)NC([C@]1(C(CC(O)CCCCC)=O)N(C(/C(N)=C/C)=O)CCC1)=O)=O)=O)=O)=O)=O)=O)=O)=O)=O)=O)=C\C)=O	['Structure-based inference']	['pubmed:24673852']
BGC0000425	NRP	Pseudomonas sp. CMR12a	sessilin A	nrpspksdomains_sesB_AMP-binding.3	valine	val	FQQQAAATPHAVAAVQGAVSLTYGELNARANQLAHHLLELGAAPGERVAILLERSLDLLMAQLAISKCAAVYVPLDVNAPTDRQAFMIEDSGARWVLTTSTTEVAGHRLDLDSLDLSTESEHNPALEQSSETAAYIMYTSGSTGTPKGVLVPHRAITRLVINNGYAEFNPQDRVAFASNPAFDASTLDVWAPLLNGGAVVVVDQDTLLSREAFATLLQEQSVSVLWMTAGLFHQYAEGLLPVFPQLRYLIVGGDVLDPSVIARVLKDGAPQHLLNGYGPTEATTFSTTYEILRADEGSIPIGKPVGNSRAYVLDARQQPVPVGVAGELYIGGQGVALGYLNRTDLTAHAFLVDPFNDGGLMYRTGDLVAWRADGTLQYLGRNDQQVKIR	TTCCAGCAGCAGGCAGCGGCAACCCCGCACGCCGTGGCGGCGGTGCAGGGTGCAGTTTCACTGACCTATGGTGAACTGAATGCGCGGGCCAACCAACTGGCCCACCACCTGCTGGAGCTCGGCGCAGCACCGGGTGAGCGGGTGGCAATCCTGCTGGAACGCTCCCTGGATTTGCTGATGGCGCAGTTGGCGATCAGCAAGTGCGCGGCGGTGTATGTACCGCTGGATGTGAATGCGCCGACGGATCGCCAAGCCTTCATGATCGAAGACAGCGGCGCCCGCTGGGTGTTGACCACCAGCACAACCGAGGTGGCTGGCCATCGTCTGGACCTGGACAGCCTCGATCTGAGCACGGAATCCGAGCACAACCCGGCCCTGGAGCAGTCGTCGGAAACCGCG…	O=C(N[C@@H]([C@@H](C)CC)C(N[C@@H](CCO)C(N[C@H](CCN)C(N[C@@H](CCCCN)C(O)=O)=O)=O)=O)[C@@H]([C@H](O)C)NC(/C(NC([C@@H](C(C)C)NC([C@H](CC(C)C)NC([C@@H](CCC(N)=O)NC([C@H](C(C)C)NC([C@@H](C(C)C)NC([C@@H](CC(C)C)NC([C@@H](CCC(N)=O)NC([C@@H](C(C)C)NC([C@@H](CC(C)C)NC([C@@H](CO)NC([C@]1(C(CC(O)CCCCC)=O)N(C(/C(N)=C/C)=O)CCC1)=O)=O)=O)=O)=O)=O)=O)=O)=O)=O)=O)=C\C)=O	['Structure-based inference']	['pubmed:24673852']
BGC0000425	NRP	Pseudomonas sp. CMR12a	sessilin A	nrpspksdomains_sesB_AMP-binding.4	glutamine	gln	EAQATRAPAAIAVVLGDQQLSYRDLNEQANRVAHYLRSLGAGANSCVAICMPRSLELIVGLLGILKSGAAYVPLDPEYPAQRLAFALQDSQPLAVLVQDASRGALGDTAMPLIDLADAALAGQPLDNPPALATAHDLAYVIFTSGSTGRPKGVMVEHGSLVNHISWQTHAFGFDATDRFLQRTSVAFDASVWEIWTPLAIGARLVLLPAEASRDVEHMARTLVEQGVSIAQFVPSLLRLLVQLPETGVRCRYLFSGGEALDPQLAMQARALTTHGIVNLYGPTEATIDSTSWTFNDPGPLDAVPIGKPIANARAYVLDAHLQLLPLGVAGELYIGGAGVARGYLGRDDLTAERFLADPFNPGGRLYKTGDLVRYLADGNIEYLGRNDDQIKLR	GAGGCCCAGGCCACTCGGGCCCCGGCGGCGATTGCGGTGGTGCTGGGCGACCAGCAGTTGAGCTACCGCGACCTGAACGAGCAGGCCAACCGCGTCGCCCATTATTTGCGCAGCCTTGGCGCAGGCGCCAATAGCTGCGTGGCGATCTGCATGCCACGCAGCCTGGAGCTGATTGTCGGCTTGCTGGGCATCCTCAAGTCCGGGGCTGCCTATGTGCCGCTGGACCCCGAATACCCGGCGCAACGCCTGGCGTTCGCCCTGCAGGATAGCCAGCCGCTGGCAGTGCTGGTGCAGGACGCCAGCCGTGGCGCGCTGGGCGATACGGCCATGCCGCTGATTGACCTGGCGGATGCCGCTTTGGCAGGGCAGCCGCTCGACAATCCGCCCGCCCTGGCCACG…	O=C(N[C@@H]([C@@H](C)CC)C(N[C@@H](CCO)C(N[C@H](CCN)C(N[C@@H](CCCCN)C(O)=O)=O)=O)=O)[C@@H]([C@H](O)C)NC(/C(NC([C@@H](C(C)C)NC([C@H](CC(C)C)NC([C@@H](CCC(N)=O)NC([C@H](C(C)C)NC([C@@H](C(C)C)NC([C@@H](CC(C)C)NC([C@@H](CCC(N)=O)NC([C@@H](C(C)C)NC([C@@H](CC(C)C)NC([C@@H](CO)NC([C@]1(C(CC(O)CCCCC)=O)N(C(/C(N)=C/C)=O)CCC1)=O)=O)=O)=O)=O)=O)=O)=O)=O)=O)=O)=C\C)=O	['Structure-based inference']	['pubmed:24673852']
BGC0000425	NRP	Pseudomonas sp. CMR12a	sessilin A	nrpspksdomains_sesB_AMP-binding.5	leucine	leu	FETQVELYPHALAVVYQGQSLTYSELNRQANQLAHQLIELGVQPDDRVAICARRSLEMLVGLVAILKAGACYVPIDPAHPAERLSYLLEDSTPVAVLMQPALAQRLPTVTAPVLELDSRLWQGPSKGNPQVSGLTPAHLAYVIYTSGSTGLPKGVMVEHQTLENLVNWHCDTFELRHGSHTSSVAGFGFDAMAWEIWPALCVGATLHLPPAREGGEDIDALLKWWLAQPLDVSFLPTPVAEYAFSQNLQHPTLKTLLVGGDRLRQFHTPQRFKLVNNYGPTEATVVATSGVVEAGQALHIGRPVANTQVYLLDAHQQPVPVGVAGELYVAGAGVARGYLNRAQMTAERFLKDPFSHDPQARMYRTGDLARWLPDGTLDYLGRNDDQVKIR	TTTGAAACCCAGGTCGAGCTGTACCCCCACGCGCTGGCCGTGGTGTACCAGGGCCAAAGCCTGACGTACAGCGAGTTGAACCGGCAGGCCAATCAGCTGGCGCACCAGTTGATCGAACTGGGCGTGCAGCCCGACGACCGCGTGGCCATCTGCGCGCGGCGCAGCCTGGAAATGCTGGTCGGGCTGGTAGCGATTCTCAAGGCGGGCGCGTGCTATGTGCCGATCGACCCGGCGCACCCGGCCGAACGCTTGAGTTACCTGCTGGAGGACAGCACACCCGTGGCCGTACTGATGCAGCCCGCCCTGGCGCAGCGCCTGCCGACCGTGACCGCGCCAGTGCTGGAGCTGGACAGTCGCCTGTGGCAAGGGCCGTCGAAGGGTAACCCGCAGGTCAGCGGG…	O=C(N[C@@H]([C@@H](C)CC)C(N[C@@H](CCO)C(N[C@H](CCN)C(N[C@@H](CCCCN)C(O)=O)=O)=O)=O)[C@@H]([C@H](O)C)NC(/C(NC([C@@H](C(C)C)NC([C@H](CC(C)C)NC([C@@H](CCC(N)=O)NC([C@H](C(C)C)NC([C@@H](C(C)C)NC([C@@H](CC(C)C)NC([C@@H](CCC(N)=O)NC([C@@H](C(C)C)NC([C@@H](CC(C)C)NC([C@@H](CO)NC([C@]1(C(CC(O)CCCCC)=O)N(C(/C(N)=C/C)=O)CCC1)=O)=O)=O)=O)=O)=O)=O)=O)=O)=O)=O)=C\C)=O	['Structure-based inference']	['pubmed:24673852']
BGC0000425	NRP	Pseudomonas sp. CMR12a	sessilin A	nrpspksdomains_sesB_AMP-binding.6	valine	val	FESWAQAQPQAVAAVHGEQQVSYAELNARANRLAHHLVSLGMPEGSSVAVLLERSIDLLVSQLALSKCALVYVPLDVNAPVERQAFMLSDSQATLLLSHAGLGKALQVQRLDLDQAHLGQLPDDQPAVVVSSEAAAYIMYTSGSTGTPKGVRVPHRAITRLVINNGYADFNQHDRVAFASNPAFDASTLEVWAPLLNGGAVVVIDQDTLLTQHAFAALLQQQDVSVVWMTAGLFHQYAEGLLEAFARLRYLIVGGDVLDPSVIARVLKGGAPRHLLNGYGPTEATTFSTTHEITRADEGSIPIGKPVGNSRAYVLDAHQQPVPVGVTGELYIGGQGVALGYLNRPELTAEKFLVDPFSDGGLMYRTGDLVAWRADGTLQYQGRNDQQVKIR	TTCGAGTCGTGGGCACAGGCGCAGCCGCAGGCCGTGGCGGCGGTGCATGGCGAGCAACAGGTGAGCTATGCCGAACTGAACGCCCGTGCTAACCGTCTGGCCCATCACCTGGTCAGCCTGGGAATGCCGGAAGGGTCAAGCGTGGCCGTGCTGCTGGAGCGTTCGATTGACCTGCTCGTGAGCCAACTGGCCCTGAGCAAATGCGCGCTGGTGTATGTGCCGCTGGACGTCAATGCACCCGTCGAACGCCAGGCCTTCATGCTCAGCGACAGCCAGGCGACGTTGCTGTTGAGCCACGCCGGGCTGGGCAAGGCGTTGCAGGTGCAGCGGCTCGATCTGGATCAGGCCCACTTGGGCCAACTGCCTGATGACCAGCCGGCGGTGGTGGTCAGTAGCGAG…	O=C(N[C@@H]([C@@H](C)CC)C(N[C@@H](CCO)C(N[C@H](CCN)C(N[C@@H](CCCCN)C(O)=O)=O)=O)=O)[C@@H]([C@H](O)C)NC(/C(NC([C@@H](C(C)C)NC([C@H](CC(C)C)NC([C@@H](CCC(N)=O)NC([C@H](C(C)C)NC([C@@H](C(C)C)NC([C@@H](CC(C)C)NC([C@@H](CCC(N)=O)NC([C@@H](C(C)C)NC([C@@H](CC(C)C)NC([C@@H](CO)NC([C@]1(C(CC(O)CCCCC)=O)N(C(/C(N)=C/C)=O)CCC1)=O)=O)=O)=O)=O)=O)=O)=O)=O)=O)=O)=C\C)=O	['Structure-based inference']	['pubmed:24673852']
BGC0000425	NRP	Pseudomonas sp. CMR12a	sessilin A	nrpspksdomains_sesC_AMP-binding.1	threonine	thr	EARAAARPDAVAVVFDDQRLSYGALNKRANQVAHRLLALGVRPDDRVAICVERGLEMIIGLLGILKAGAGYVPIDPAYPQERISYTLQDSAPVAVLVQQATHTRVAELSVPVITLDTGDCQDESTGNPQVAGLTPANLAYVIYTSGSTGLPKGVMIEHRNVARLFTATEAWFHFNDHDVWALFHSFAFDFSVWEIWGALMHGGQLLVVPQLTSRSPDECYALLCSAGVTILNQTPSAFRALIVAQGQSTLKHALRQVIFGGEALEPGILKPWYAHTANSGTQLVNMYGITETTVHVTYRALEAADAQLVGASPIGGGIPDLQLYVLDDRREPVPVGVVGELYVGGAGVARGYLNRPELNAERFIDDPFSGRPGARLYKTGDLGRRLADGSIDYLGRNDD…	GAAGCCCGTGCGGCGGCGCGGCCTGACGCCGTCGCGGTGGTGTTTGATGACCAGCGCCTGAGCTACGGCGCGCTCAACAAGCGCGCCAACCAGGTCGCGCATCGCCTGCTGGCGTTGGGCGTGCGCCCGGATGATCGCGTAGCGATCTGCGTCGAGCGCGGTCTGGAAATGATCATTGGCCTGTTGGGTATTCTCAAGGCCGGTGCCGGTTACGTCCCCATCGATCCGGCCTACCCCCAGGAACGCATCAGCTACACCTTGCAAGACAGCGCGCCGGTGGCCGTGCTGGTGCAACAGGCCACCCACACCCGGGTGGCCGAATTGTCGGTGCCGGTGATCACGCTGGATACGGGGGACTGCCAGGACGAATCAACCGGCAACCCCCAGGTCGCGGGCCTG…	O=C(N[C@@H]([C@@H](C)CC)C(N[C@@H](CCO)C(N[C@H](CCN)C(N[C@@H](CCCCN)C(O)=O)=O)=O)=O)[C@@H]([C@H](O)C)NC(/C(NC([C@@H](C(C)C)NC([C@H](CC(C)C)NC([C@@H](CCC(N)=O)NC([C@H](C(C)C)NC([C@@H](C(C)C)NC([C@@H](CC(C)C)NC([C@@H](CCC(N)=O)NC([C@@H](C(C)C)NC([C@@H](CC(C)C)NC([C@@H](CO)NC([C@]1(C(CC(O)CCCCC)=O)N(C(/C(N)=C/C)=O)CCC1)=O)=O)=O)=O)=O)=O)=O)=O)=O)=O)=O)=C\C)=O	['Structure-based inference']	['pubmed:24673852']
BGC0000425	NRP	Pseudomonas sp. CMR12a	sessilin A	nrpspksdomains_sesC_AMP-binding.2	threonine	thr	ERQAAEQPDAIAVVFEDSHLSYAELNTRANRVAHRLLSLGVSPDERVAICVERGLEMIIGLLGILKAGAGYVPIDPAYPQERISYTLQDSAPVAVLVQAATQARIAELAVPVIDLDATDLQLQPMQNPQVPGLTSANLAYVIYTSGSTGLPKGVMIEHRNVARLFSATEGWFNFNDKDVWALFHSFAFDFSVWEIWGALIHGGQLLVVPQLTSRSPDECYALLCSAGVTILNQTPSAFRSLIAAQGQSALKHSLRQVIFGGEALEPGMLKPWYARTANAGTQLVNMYGITETTVHVTYRALEAADAQLVGASPIGGRIPDLQLYVLDSAREPVPVGVVGELYVGGAGVARGYLNRPELNAERFIADPFSGRADARLYKTGDLGRWLPDGSIDYLGRNDD…	GAGCGCCAGGCGGCCGAACAGCCCGATGCCATCGCGGTGGTGTTTGAAGACAGTCACCTGAGCTACGCCGAGCTGAACACGCGCGCGAACAGAGTTGCGCACCGCCTGCTGAGCCTGGGCGTAAGCCCGGATGAGCGGGTGGCGATCTGCGTGGAGCGCGGGCTGGAAATGATCATCGGCTTGCTCGGCATCCTCAAGGCGGGTGCCGGTTACGTACCGATCGACCCTGCCTACCCGCAGGAACGCATCAGTTACACCCTGCAGGACAGTGCGCCGGTGGCGGTGCTGGTGCAGGCGGCGACACAGGCGCGGATTGCCGAACTTGCGGTGCCGGTGATTGACCTGGACGCGACGGACCTGCAACTGCAGCCGATGCAGAACCCGCAAGTGCCTGGCCTG…	O=C(N[C@@H]([C@@H](C)CC)C(N[C@@H](CCO)C(N[C@H](CCN)C(N[C@@H](CCCCN)C(O)=O)=O)=O)=O)[C@@H]([C@H](O)C)NC(/C(NC([C@@H](C(C)C)NC([C@H](CC(C)C)NC([C@@H](CCC(N)=O)NC([C@H](C(C)C)NC([C@@H](C(C)C)NC([C@@H](CC(C)C)NC([C@@H](CCC(N)=O)NC([C@@H](C(C)C)NC([C@@H](CC(C)C)NC([C@@H](CO)NC([C@]1(C(CC(O)CCCCC)=O)N(C(/C(N)=C/C)=O)CCC1)=O)=O)=O)=O)=O)=O)=O)=O)=O)=O)=O)=C\C)=O	['Structure-based inference']	['pubmed:24673852']
BGC0000425	NRP	Pseudomonas sp. CMR12a	sessilin A	nrpspksdomains_sesC_AMP-binding.3	isoleucine	ile	FEAQVRIRPDAVAVVHAEQSLSYAQLNRRANRLAHHLISLGVQAGDSVAILLERSVDLLASQLAISKAAAVYVPLDVNAPADRQTFMRQDSGARWLLTTSAHQAPEGGERLDLDSLDLSDAPVHDPAIEQSAESVAYIMYTSGSTGVPKGVLVPHRGITRLVINGGYADFNTHDRIAFASNPAFDASTMDVWGALLNGGQVVVIDHDTLLDPLRFGAVLSESAVTILFTTTALFNQYVQLIPDALKGLRMLLCGGERADPAAFRSLLEHAPKLRLVHCYGPTESTTYATTFEVRALADDAESVPIGGPISNTRIYLLDQRQQPVPLGVVGEIYIGGKGVAKGYLNRPELTAEKFILDPFSHEPGALMYRTGDLGRWLAKGELDCLGRNDDQVKIR	TTCGAGGCTCAGGTACGCATCCGTCCGGACGCTGTAGCGGTGGTTCACGCTGAACAGTCGCTGAGCTATGCGCAATTGAACCGGCGCGCCAACCGCCTGGCCCACCACCTGATCAGCCTGGGCGTGCAGGCGGGTGACAGTGTCGCCATCCTGCTGGAGCGTTCCGTAGACTTGCTGGCCAGCCAACTGGCAATCAGCAAGGCAGCCGCGGTGTATGTGCCGCTGGATGTCAACGCTCCCGCCGACCGTCAAACCTTCATGCGCCAGGACAGCGGCGCGCGATGGCTGCTCACCACCAGCGCCCATCAAGCCCCCGAAGGCGGCGAGCGCCTGGACCTGGACAGCCTCGACCTGAGCGATGCTCCGGTCCACGACCCGGCCATTGAACAGTCTGCCGAG…	O=C(N[C@@H]([C@@H](C)CC)C(N[C@@H](CCO)C(N[C@H](CCN)C(N[C@@H](CCCCN)C(O)=O)=O)=O)=O)[C@@H]([C@H](O)C)NC(/C(NC([C@@H](C(C)C)NC([C@H](CC(C)C)NC([C@@H](CCC(N)=O)NC([C@H](C(C)C)NC([C@@H](C(C)C)NC([C@@H](CC(C)C)NC([C@@H](CCC(N)=O)NC([C@@H](C(C)C)NC([C@@H](CC(C)C)NC([C@@H](CO)NC([C@]1(C(CC(O)CCCCC)=O)N(C(/C(N)=C/C)=O)CCC1)=O)=O)=O)=O)=O)=O)=O)=O)=O)=O)=O)=C\C)=O	['Structure-based inference']	['pubmed:24673852']
BGC0000425	NRP	Pseudomonas sp. CMR12a	sessilin A	nrpspksdomains_sesC_AMP-binding.4	homoserine	ser	FEAQALRTPDARAVQAGNGSLTYRELNERANRLAHHLRELGVQPDARVAICVERSAELIVGLLAILKAGGAYVPIDPNYPLERIHYMLHDSAPAALLVHSATAQLAGEPGLPVVDLDRDDAYTPNLHNPQVAELTATHLTYVIYTSGSTGQPKGVMVEHQGVVNMLGWYLDDVGLNASDAVLLLTSHSFDLTQKNIFASLAVGATLHLADSPFDPSSIVRQISDQAITHINLAPSAFYALIDADQQSALSQLRRVVLGGEPIKLSQLEKLQVPRPQFINSYGPTECSDVVAWHAVDADLDSYGATDIPLGRPLRNLTLYVLDAYGQLVPTGSVGELYIGGAGVARGYLNREALTAERFLDDPFTPGGRMYRTGDLARYRADGTLDYLGRNDDQVKIR	TTCGAGGCTCAGGCGCTGCGCACACCGGATGCCCGTGCCGTGCAGGCCGGCAACGGTTCACTGACCTACCGCGAGCTAAACGAGCGTGCCAACCGGCTGGCCCACCACTTGCGCGAGCTTGGCGTACAGCCCGATGCCCGCGTGGCGATCTGTGTGGAGCGCAGTGCCGAGCTGATTGTCGGCTTGCTGGCGATTCTCAAGGCCGGCGGCGCCTATGTGCCGATCGACCCGAACTACCCGCTGGAGCGCATTCACTACATGTTGCACGACAGCGCCCCGGCGGCGCTGCTGGTGCACAGTGCGACCGCGCAGCTGGCCGGCGAACCGGGCCTGCCGGTGGTCGACCTCGACCGTGATGACGCGTACACCCCGAACCTGCATAACCCGCAGGTGGCCGAA…	O=C(N[C@@H]([C@@H](C)CC)C(N[C@@H](CCO)C(N[C@H](CCN)C(N[C@@H](CCCCN)C(O)=O)=O)=O)=O)[C@@H]([C@H](O)C)NC(/C(NC([C@@H](C(C)C)NC([C@H](CC(C)C)NC([C@@H](CCC(N)=O)NC([C@H](C(C)C)NC([C@@H](C(C)C)NC([C@@H](CC(C)C)NC([C@@H](CCC(N)=O)NC([C@@H](C(C)C)NC([C@@H](CC(C)C)NC([C@@H](CO)NC([C@]1(C(CC(O)CCCCC)=O)N(C(/C(N)=C/C)=O)CCC1)=O)=O)=O)=O)=O)=O)=O)=O)=O)=O)=O)=C\C)=O	['Structure-based inference']	['pubmed:24673852']
BGC0000425	NRP	Pseudomonas sp. CMR12a	sessilin A	nrpspksdomains_sesC_AMP-binding.5	2,4-diaminobutyric acid	dab	FEAQVEATPQAIAVAFEAGRISYAELNRRANRLAHHLIGLGIGPDERVAICAERGDEVLVGLLGVLKAGAAYVPLDPNYPPERLAYMIADSTPSAVLTQRPLQDRLPALAIPSVLLDEPVEGADHNPVVPGLNARHLAYVIYTSGSTGNPKGVMIEHRGLVNYSLDAARLFGLTPQDTVLQQNTLNFDLSVEEIFPALLAGATLAPSRHVFGTEAARDPAITPTFLHLTAAHWHTLAAEWHHDPQQAQAHLRDVRLINVTGDALSAQKLKLWDEARPAHVRLINTYGPTEATVSCTTAYVSYTGDINGNTTIGKPMANTRIYLLDSRQQPVPLGVAGEIFIGGDGVARGYLNLEQISTERFIADPFSPVPGARMYKTGDLARYLADGSIEYLGRNDFQV…	TTTGAAGCCCAGGTCGAGGCCACGCCGCAGGCCATCGCGGTGGCGTTCGAAGCTGGGCGCATCAGTTATGCCGAACTCAACCGCCGGGCCAACCGCCTGGCGCATCACCTGATCGGCCTGGGCATTGGCCCGGACGAGCGCGTGGCGATCTGCGCCGAGCGCGGCGATGAGGTGCTGGTGGGCCTGCTCGGGGTACTCAAGGCCGGCGCTGCTTATGTGCCGCTGGACCCCAATTACCCGCCGGAGCGCCTGGCTTACATGATCGCCGACAGTACACCTTCGGCGGTGCTGACCCAGCGTCCGTTGCAGGACCGTCTGCCGGCCCTGGCGATCCCGAGTGTGTTGCTGGATGAACCGGTCGAGGGTGCCGACCACAACCCGGTGGTGCCGGGCCTCAAT…	O=C(N[C@@H]([C@@H](C)CC)C(N[C@@H](CCO)C(N[C@H](CCN)C(N[C@@H](CCCCN)C(O)=O)=O)=O)=O)[C@@H]([C@H](O)C)NC(/C(NC([C@@H](C(C)C)NC([C@H](CC(C)C)NC([C@@H](CCC(N)=O)NC([C@H](C(C)C)NC([C@@H](C(C)C)NC([C@@H](CC(C)C)NC([C@@H](CCC(N)=O)NC([C@@H](C(C)C)NC([C@@H](CC(C)C)NC([C@@H](CO)NC([C@]1(C(CC(O)CCCCC)=O)N(C(/C(N)=C/C)=O)CCC1)=O)=O)=O)=O)=O)=O)=O)=O)=O)=O)=O)=C\C)=O	['Structure-based inference']	['pubmed:24673852']
BGC0000425	NRP	Pseudomonas sp. CMR12a	sessilin A	nrpspksdomains_sesC_AMP-binding.6	lysine	lys	FEAQVLRTPGAIALEFDGQALSYAELNAQANQLAHHLITLGVQPDDRVAIALERGMQMVVALLATLKSGAAYVPLDPAYPPQRLAFMLGDSAPRVLLSEYAVLPLLGTLPQAMQVVTLNSALQPWRELGTHNPQPAQLGLVSEHLAYVLYTSGSTGTPKGVMIEHAGLCNEIQAIRGLTGLGAGDRALQFATINFDASIEEIFGALTCGATLVLRSADWLTDAAHFWSLAAQARLSVISLPTRFWQGLADDHSTVIPASVRVIVVGGEELSPEAVQHWFLRSGHTPRLLNTYGPTEATIIATANEVFAANPHPRAIGRPIANTRVYVLDTHGHPTGLGVAGEIHLAGIGIARGYLNQPQLSSERFLADPFSDSPGRLYKTGDLGRWLPDGTLEYLGRND…	TTCGAGGCCCAGGTACTGCGTACCCCCGGCGCGATCGCGCTGGAGTTCGACGGCCAGGCGCTGAGCTACGCCGAACTGAATGCCCAGGCCAACCAGTTGGCCCATCATTTGATTACCCTCGGCGTGCAGCCTGACGACCGTGTCGCTATCGCGCTGGAGCGCGGGATGCAGATGGTGGTGGCCTTGCTCGCCACCCTCAAATCCGGTGCTGCGTACGTACCGCTCGACCCGGCTTACCCGCCGCAACGCCTGGCTTTCATGCTCGGCGACAGTGCGCCACGGGTGTTGCTCAGCGAGTACGCAGTGCTGCCGCTGCTCGGCACGCTGCCACAGGCCATGCAGGTGGTGACCTTGAACAGCGCGCTGCAACCCTGGCGCGAGCTGGGCACGCACAACCCG…	O=C(N[C@@H]([C@@H](C)CC)C(N[C@@H](CCO)C(N[C@H](CCN)C(N[C@@H](CCCCN)C(O)=O)=O)=O)=O)[C@@H]([C@H](O)C)NC(/C(NC([C@@H](C(C)C)NC([C@H](CC(C)C)NC([C@@H](CCC(N)=O)NC([C@H](C(C)C)NC([C@@H](C(C)C)NC([C@@H](CC(C)C)NC([C@@H](CCC(N)=O)NC([C@@H](C(C)C)NC([C@@H](CC(C)C)NC([C@@H](CO)NC([C@]1(C(CC(O)CCCCC)=O)N(C(/C(N)=C/C)=O)CCC1)=O)=O)=O)=O)=O)=O)=O)=O)=O)=O)=O)=C\C)=O	['Structure-based inference']	['pubmed:24673852']
BGC0000435	NRP	Pseudomonas syringae pv. tomato str. DC3000	syringafactin	nrpspksdomains_PSPTO_2829_AMP-binding.1	leucine	leu	EQQAHAFPHAVAAAFQGQHLTYAQLNRHANALARRLIDQGVRPDDRVAVVSRRSLETLIGLLAILKAGAAYVPIDPSHPRERLNYLLSDSAPVAVLTLSSLADRLPPLAVPLIELDHCAHSQGDDSNPQVSGLSRDNLVYVIYTSGSTGQPKGVMVEHHTLASLVDWHCAAFDVKAGSHTSCLAGFGFDAMAWEVWPTLCAGATLHLAPVQESGEDIEAMLNWWRAQPLDVSFLPTPVAEYAFSQDDEHPTLRTLLIGGDRLRQFAHNRRYAVVNNYGPTETTVVATSGQVFASGSLHIGVPIANTRVYVLDGHLQPLPPGVPGELYIGGAGVARGYLNQPQLTEERFIHDPFSDVASARMYRSGDLVAWNADGTLDYLGRNDDQVKIR	GAGCAACAGGCCCATGCGTTCCCACATGCCGTGGCAGCCGCGTTTCAGGGACAACACCTGACCTACGCACAACTCAATCGGCACGCCAATGCCTTGGCCCGGCGCCTGATCGACCAAGGCGTGCGCCCGGATGATCGCGTCGCTGTTGTTTCGCGCCGCAGCCTGGAAACCTTGATCGGTTTGCTGGCGATTCTCAAAGCGGGGGCAGCTTATGTGCCCATCGACCCGTCGCACCCCCGCGAACGCCTGAATTACTTGCTGAGCGACAGCGCGCCGGTGGCCGTGTTGACACTATCGTCGCTGGCGGATCGCTTACCGCCGTTGGCGGTGCCGCTGATCGAGCTGGATCACTGCGCGCATAGCCAGGGCGATGACAGCAATCCGCAGGTGTCGGGCCTT…	[]	['Mass spectrometry', 'Structure-based inference']	['pubmed:17601782']
BGC0000435	NRP	Pseudomonas syringae pv. tomato str. DC3000	syringafactin	nrpspksdomains_PSPTO_2829_AMP-binding.2	leucine	leu	EAQVARTPQSPALIQDGTSLSYAQLNQQANRLAHHLISLGVRPDERVALCLHRGPQRLIAMLAVLKAGAAYVPVDPVYPAERIAYLLQDSTPRLVLTEHATLALVGDIAQVNIEQAEVHSHPDSNPQVQGLDAQNLAYVIYTSGSTGQPKGVMVEHRTLANLVHWHCQAFSLHAGSHTASVAGFGFDAMAWEVWPALCAGAVLHLPPAQVGNEHVDELLDWWLEQPLQVSFLPTPVAEQAFRRPRQHPTLRTLLIGGDRLRQFDSDPGFAVINNYGPTETTVVATSGPVTPGGPLHIGGPIANTRVYVLDEQLQPVPVGVIGELYIGGAGVARGYLNKPQMTEERFVADPFSDKVQARMYRSGDLVRWNVDGSLDYLGRNDDQVKIR	GAAGCGCAGGTTGCCAGAACGCCACAAAGCCCTGCGCTGATTCAGGATGGCACCAGCCTTTCCTATGCCCAGCTCAACCAGCAGGCCAATCGCCTCGCGCATCACCTGATCAGCCTGGGAGTCAGGCCGGACGAGCGGGTCGCGCTGTGCCTGCATCGTGGGCCGCAACGCCTGATCGCCATGCTCGCCGTACTCAAGGCGGGTGCCGCCTATGTGCCGGTAGATCCGGTGTACCCGGCCGAGCGTATCGCCTACCTGCTGCAAGACAGCACGCCGCGTCTGGTGCTGACCGAGCACGCGACCCTCGCTCTGGTGGGCGATATCGCTCAGGTGAACATCGAGCAGGCCGAGGTGCATTCGCACCCCGACAGCAATCCCCAGGTGCAGGGCCTTGATGCG…	[]	['Mass spectrometry', 'Structure-based inference']	['pubmed:17601782']
BGC0000435	NRP	Pseudomonas syringae pv. tomato str. DC3000	syringafactin	nrpspksdomains_PSPTO_2829_AMP-binding.3	glutamine	gln	FEAQVARTPQAVAVRAGRSQLSFRQLNEQANCLAHHLIKLGVRPDDRVAICVERGVGMVVGLLAILKAGGAYVPLDPSYPRERLHYMFKDSAPIALLTQATTRALLDDEGTPRVDLDSADWDMQHVANPRVTDLTPNHLAYVIYTSGSTGTPKGVMVEHRNVSNLVQWSSRLCPPTSGSALLHKTPISFDASVWEIFWPLSSGIALVLARPDGQRDPAYVAQVIQERRISVVQFVPVLLQQFLDLPQSRDCHSLTDIVCGGGELTVALAEQLRQRLPQVRLHNVYGPTETTVDCSVWTLEPHQPVPGSVLPIGRPISNTRMYVLDAQDQPVPQGVSGQLHIGGSGVTRGYLNLPQADAERFIDSPFVSGDRLYRSGDLVRQRADGLLEFLGRNDDQVKI	TTTGAAGCCCAGGTTGCGCGCACCCCGCAGGCGGTCGCTGTGCGCGCCGGACGCTCGCAATTGAGCTTTCGGCAGCTCAACGAGCAGGCCAACTGCCTGGCTCATCACCTGATCAAGCTGGGTGTACGTCCTGACGACCGCGTAGCGATTTGTGTCGAGCGCGGCGTTGGTATGGTGGTCGGCCTGCTGGCGATCCTCAAGGCCGGTGGTGCTTATGTGCCGCTGGACCCGAGTTATCCGCGCGAACGCCTGCACTATATGTTCAAGGACAGCGCGCCCATCGCACTGTTGACGCAGGCGACCACCCGCGCACTGCTCGACGATGAAGGTACACCGCGTGTCGATCTGGACAGCGCCGACTGGGACATGCAGCACGTTGCCAATCCACGGGTCACCGAC…	[]	['Mass spectrometry', 'Structure-based inference']	['pubmed:17601782']
BGC0000435	NRP	Pseudomonas syringae pv. tomato str. DC3000	syringafactin	nrpspksdomains_PSPTO_2830_AMP-binding.1	leucine	leu	EQQAQARPDAIAAQVGEHCLSYGELNQRANALAHHLISLGVRPDDRVAVVARRGLETLVSLLAVLKSGAGYVPIDPAHPDERVAYLLTDSAPLAVLTQPALLPRLEGLSLPGPKALLIDLERSDWPAKTGNPQLADLTSSHLAYVIYTSGSTGQPKGVMVEHRTLNNLIDWHCEAFDLRAGSHTASVAGFGFDAMAWEVWPALCAGATLHLPPADIGNEQLDALLDWWLAQPLQVAFLPTPVAEYAFSRDLRHPTLRTLLIGGDRLRQFHRDPGFAVINNYGPTETTVVATSGRLLPNGSLDIGKPIANTSVYLLDSLHKLVPFGVAGELYIGGESVARGYLNQPQLTAERFLRDPFAEPPQARMYRTGDLARWNPDGTLEYLGRNDDQVKLR	GAACAGCAGGCCCAGGCACGCCCTGACGCCATCGCCGCGCAAGTGGGCGAACACTGCCTGAGCTATGGAGAACTGAACCAGCGCGCCAACGCCCTTGCGCATCACCTGATCAGCCTCGGCGTACGCCCGGACGACCGCGTGGCGGTGGTCGCCCGGCGGGGTCTGGAGACACTGGTCAGCCTGCTGGCGGTGCTCAAATCCGGTGCTGGCTACGTGCCCATCGACCCAGCGCACCCTGACGAGCGTGTGGCCTACCTGCTGACCGACAGCGCGCCATTGGCGGTACTGACGCAACCGGCATTGCTGCCCCGCCTTGAAGGGCTCAGCCTGCCAGGGCCCAAGGCACTGCTGATCGATCTTGAACGCTCGGACTGGCCAGCAAAAACGGGCAACCCACAG…	[]	['Mass spectrometry', 'Structure-based inference']	['pubmed:17601782']
BGC0000435	NRP	Pseudomonas syringae pv. tomato str. DC3000	syringafactin	nrpspksdomains_PSPTO_2830_AMP-binding.2	threonine	thr	FEAQVQRTPDAIAVSFADQSWSYATLNAQANKIAHRLIGLGIGEDDRVAICTHRGLEMIAGLLGILKAGAAYVPLDPAYPLERIAYTLGDSAPVALLSQRSVQAALPVSQVPVISLDEAGLQDESERNPQVSVKPTSLAYVIYTSGSTGLPKGVMIEHRNVARLFSATEDWFGFNEQDVWSLFHSFAFDFSVWEIWGALLHGGRLLIVPQLVSRSPEDFYALLCSAGVTVLNQTPSAFRQLIAAQGENPQAHSLRQVIFGGEALETAMLKPWYARNVNAATQLVNMYGITETTVHVTYYPVQPEDAQRVGASPIGKRIADLQLYVLDTCGEPVPLGVVGELYVGGAGVARGYLNREALTAERFLDNPFSHAADARIYRTGDLARWMADGSLEYLGRNDE…	TTTGAAGCGCAGGTGCAGCGCACGCCAGATGCGATTGCCGTGAGTTTTGCAGACCAATCGTGGAGCTACGCGACGCTTAACGCCCAGGCCAACAAAATCGCGCATCGCCTGATTGGCCTGGGCATCGGTGAGGATGACCGTGTCGCCATCTGCACGCATCGTGGCCTGGAAATGATCGCGGGCCTGCTGGGGATTCTCAAGGCCGGTGCCGCCTACGTGCCACTGGACCCGGCTTACCCTCTGGAGCGCATTGCCTACACCCTCGGCGACAGCGCGCCGGTAGCGTTGCTGAGCCAGCGGTCAGTGCAGGCCGCCTTGCCGGTGTCGCAAGTGCCGGTGATCAGCCTCGACGAGGCCGGTTTGCAGGACGAATCCGAGCGTAATCCGCAGGTGTCGGTC…	[]	['Mass spectrometry', 'Structure-based inference']	['pubmed:17601782']
BGC0000435	NRP	Pseudomonas syringae pv. tomato str. DC3000	syringafactin	nrpspksdomains_PSPTO_2830_AMP-binding.3	valine	val	FERRAALQPQAIAAVHGRRSLTYGELNERANHLAHYLLGQGVRPDEHVAILLPRSLELLISQLAIGKCAATYVPLDVNAPAERQQYMLGDCQAKCVLTQSAMSIATSVQRIDLDQLNLDDQPAHDPGLPQGADTAAYVMYTSGSTGAPKGVRVGHRGIVRLVLNNGYAEFNEQDSIAFASNPAFDASTMEVWGALLNGGQLVVIEHTTLIDPARFSAALRHGNVSVLFLTTALFNQYVQMIPEALGGLRVLISGGERADPVSFRAMLAQAPGLHLLNGYGPTETTTFATAYDVRALASSAESVPIGRPIGNTRVYVLNAQQRLAPLGVIGELYIGGDGVALGYLNRPELTVEKFIADPFSDQPGAMMYRTGDLGRWLEDGQLECLGRNDDQVKIR	TTCGAGCGTCGCGCGGCACTTCAACCGCAGGCCATTGCGGCCGTGCATGGCCGTCGTTCGCTGACGTACGGCGAGTTGAACGAACGCGCCAACCACCTTGCGCATTACCTGCTGGGGCAGGGCGTACGGCCTGATGAGCATGTGGCGATTCTGCTGCCACGCTCGCTGGAACTGCTGATCAGCCAGTTGGCGATCGGCAAATGCGCGGCAACCTATGTACCGCTGGATGTCAATGCACCCGCCGAAAGACAGCAGTACATGCTTGGCGACTGCCAGGCGAAATGCGTATTGACGCAGAGCGCCATGTCGATTGCCACGTCGGTGCAGCGCATCGATCTGGACCAGTTGAATCTGGACGACCAGCCCGCGCATGATCCTGGCTTGCCGCAAGGCGCGGAC…	[]	['Mass spectrometry', 'Structure-based inference']	['pubmed:17601782']
BGC0000435	NRP	Pseudomonas syringae pv. tomato str. DC3000	syringafactin	nrpspksdomains_PSPTO_2830_AMP-binding.4	leucine	leu	EAQATRLPTAIAAQVGEQSLSYAELNRQANSLAHYLISLGVRPDERIAVVARRGLDTLVGLLAVLKAGACYVPVDPAHPGERIAYLLSDSAPVAVLAQQTFIERLPALGVPVIALDRPHWPEQAHNPIVAGLTAKDLAYVIYTSGSTGQPKGVMVEHRTLENLVHWHCQAFDLHAGSHTASVAGFGFDAMAWEVWPALCAGATLHVPPAEIGNEQLDALLDWWLAQPLQVAFLPTPVAEYAFSRQLRHPTLRTLLIGGDRLRQFHREPGFAVINNYGPTEATVVATSGRLLPDGSLDIGKPIANTRVYLLDEQQQLVPLGVAGELYIGGEGVARGYLNQPQLTAERFLLDPFAGQPHARMYRTGDLARWNADGTLDYLGRNDDQVKIR	GAGGCTCAGGCAACCCGTTTACCTACAGCGATTGCGGCGCAGGTCGGCGAGCAGTCGCTGAGTTATGCCGAGCTGAACCGCCAGGCCAACAGCCTTGCTCATTATCTGATCAGCCTGGGCGTGCGCCCGGATGAGCGTATTGCAGTGGTGGCGCGTCGCGGGCTGGACACGCTCGTGGGCCTGCTGGCGGTGCTCAAGGCCGGGGCCTGCTATGTGCCGGTGGATCCGGCGCATCCGGGCGAACGCATTGCCTACCTGCTGAGCGACAGCGCGCCGGTTGCGGTGCTGGCGCAACAGACCTTCATCGAGCGTCTGCCCGCGCTGGGCGTGCCGGTGATCGCGCTGGATCGGCCGCACTGGCCCGAGCAGGCGCACAACCCCATCGTGGCAGGGCTGACC…	[]	['Mass spectrometry', 'Structure-based inference']	['pubmed:17601782']
BGC0000435	NRP	Pseudomonas syringae pv. tomato str. DC3000	syringafactin	nrpspksdomains_PSPTO_2830_AMP-binding.5	leucine	leu	EQHALHQPDTVAVQVGDQRLTYGELNHRANALAHYLIGLGVRPDDRVAVLARRGLETLCAMLAVLKAGASYVPVDPAHPDERIGYLLEDSAPVVVLAQFDLLARVPDLHVPRVALDRPDWLQRDDTPHVPGLTAENLAYVIYTSGSTGQPKGVMVEHRTLNNLVDWHCQAFDLRAGSQTASVAGFGFDAMAWEVWPALCAGAVLHLPPADIGNEQLDLLLDWWLAQQLHVAFLPTPVAEYAFSRELHHPTLHTLLIGGDRLRHFKRDPGFAVVNNYGPTETTVVASSGLMLPQGVLHIGKPVAHARLYVLDAHSQPVPLGVPGELYIGGTGVARGYLNRPDLTAERFLDDPFSNVTAARMYRTGDLVRWLADGTLEYLGRNDDQVKIR	GAGCAGCATGCTCTGCACCAGCCCGATACTGTGGCGGTACAGGTGGGCGATCAGCGCCTGACCTACGGCGAGCTGAATCATCGCGCCAATGCGTTGGCCCATTACCTGATCGGGCTTGGTGTGCGCCCGGACGATCGGGTGGCGGTACTGGCGCGGCGCGGGCTGGAAACACTGTGCGCAATGCTCGCGGTACTCAAAGCCGGAGCCAGCTACGTGCCGGTCGATCCGGCGCACCCGGACGAGCGTATCGGTTACCTGCTGGAAGACAGCGCGCCGGTGGTGGTGCTGGCCCAGTTCGACCTGTTGGCGCGGGTACCTGATCTGCATGTGCCGCGGGTTGCGCTGGATCGCCCGGACTGGCTGCAGCGTGATGACACGCCGCACGTGCCAGGCCTGACC…	[]	['Mass spectrometry', 'Structure-based inference']	['pubmed:17601782']
BGC0000437	NRP	Pseudomonas syringae pv. syringae B728a	syringomycin	nrpspksdomains_Psyr_2608_AMP-binding.1	serine	ser	EQQAAQRPDACAVRGDSGPLLTYAELNQQANQLAHRLIELGVEPDTRVAVSLRRGAEMVVALLGILKAGGAYVPIDPDLPSARQAYMLEDSSPQAVLTTRDLSDNLPASDHPVLVLDGHDDRAQLASQPTGNPDAKALGLQPNHLAYVLYTSGSTGTPKGVMNEHLGVVNRLLWARDAYQVNSQDRVLQKTPFGFDVSVWEFFLPLLTGAELVMARPGGHQDPDYLAQVMSDAGITLLHFVPSMLDVFLEHRSTRDFPQLRRVLCSGEALPRALQRRFEQHLKGVELHNLYGPTEAAIDVTAWECRPTDPGESVPIGRPIANIQMHVLDTLGQLQPLGVAGELHIGGIGVARGYLNQPDLSAERFIADPFSSDPQARLYKTGDVGRWLANGALEYLGRN…	GAACAACAGGCCGCCCAGCGTCCGGATGCCTGCGCCGTACGTGGCGACAGCGGGCCGTTGCTCACTTACGCCGAACTCAACCAGCAGGCCAACCAGCTCGCCCATCGCCTGATCGAACTGGGCGTGGAGCCGGATACGCGTGTCGCGGTCAGCCTGCGTCGCGGCGCGGAAATGGTCGTGGCGCTGTTGGGTATTCTCAAGGCCGGTGGCGCCTATGTACCGATCGACCCTGACCTGCCCAGCGCTCGCCAGGCCTATATGCTCGAGGACAGCTCGCCGCAGGCAGTGCTGACCACTCGGGACCTGAGCGACAACCTGCCGGCCTCGGATCATCCGGTGCTGGTGCTCGATGGCCACGATGACCGCGCCCAGCTTGCCTCACAGCCGACCGGCAACCCG…	CCCCCCCCC[C@@H](CC(=O)N[C@H]1COC(=O)[C@@H](NC(=O)[C@@H](NC(=O)/C(=C/C)/NC(=O)[C@@H](NC(=O)[C@@H](NC(=O)[C@@H](NC(=O)[C@H](NC(=O)[C@H](NC1=O)CO)CCN)CCN)CCCN=C(N)N)CC2=CC=CC=C2)[C@@H](C(=O)O)O)[C@@H](CCl)O)O	['ATP-PPi exchange assay']	['pubmed:11277431', 'pubmed:12744455']
BGC0000437	NRP	Pseudomonas syringae pv. syringae B728a	syringomycin	nrpspksdomains_Psyr_2608_AMP-binding.2	serine	ser	EQQAAQRPDACAVRGDSGPLLTYAELNQQANQLAHRLIELGVEPDTRVAVSLRRGPEMVVALLGILKAGGAYVPIDPDLPSARQAYMLEDSSPQAVLTTRDLSDNLPASDLPVLVLDGHDDRAQLARQQSVNPDAKALGLQPNHLAYVLYTSGSTGTPKGVMNEHLGVVNRLLWARDAYQVNSQDRVLQKTPFGFDVSVWEFFLPLLTGAELVMARPGGHQDPDYLAQVMSDAGITLLHFVPSMLDVFLEHRSTRDFPQLRRVLCSGEALPRALQRRFEQQLKGVELHNLYGPTEAAIDVTAWECRPTDPGDSVPIGRPIANIQMHVLDALGQLQPLGVAGELHIGGIGVARGYLNQPDLSAERFIADPFSEDRQARLYKTGDVGRWLANGALEYLGRN…	GAACAACAGGCCGCCCAGCGTCCGGATGCCTGCGCCGTACGTGGCGACAGCGGGCCGTTGCTCACTTACGCCGAACTCAACCAGCAGGCGAACCAGCTCGCCCATCGCCTGATCGAGCTGGGCGTGGAGCCTGATACGCGGGTCGCGGTCAGCCTGCGTCGCGGCCCGGAAATGGTCGTGGCGCTGTTAGGTATTCTCAAGGCCGGTGGCGCCTATGTACCGATCGACCCTGACCTGCCCAGCGCCCGCCAGGCGTATATGCTCGAGGACAGCTCGCCGCAGGCAGTGCTGACTACTCGGGACCTGAGCGACAACCTGCCGGCCTCGGATCTTCCGGTGCTGGTGCTCGATGGCCACGATGACCGTGCGCAACTGGCCAGGCAGCAGAGCGTCAACCCG…	CCCCCCCCC[C@@H](CC(=O)N[C@H]1COC(=O)[C@@H](NC(=O)[C@@H](NC(=O)/C(=C/C)/NC(=O)[C@@H](NC(=O)[C@@H](NC(=O)[C@@H](NC(=O)[C@H](NC(=O)[C@H](NC1=O)CO)CCN)CCN)CCCN=C(N)N)CC2=CC=CC=C2)[C@@H](C(=O)O)O)[C@@H](CCl)O)O	['ATP-PPi exchange assay']	['pubmed:11277431', 'pubmed:12744455']
BGC0000437	NRP	Pseudomonas syringae pv. syringae B728a	syringomycin	nrpspksdomains_Psyr_2608_AMP-binding.3	2,4-diaminobutyric acid	dab	FEAQVRTQPDAIAVAFQAQRLSYAELNRQANRLAHHLIGLGIGPDDRVAICVERGVEMMVGLLGVLKAGAAYVPLDPAYPAERLAYMIEDSQPAALLTQRHLQEYLPTLTLPLVLLDDDQRKTFTERDDNPVVEALGVRNLAYVIYTSGSTGNPKGVMIEHRGLVNYSVDAARLFGLSQSDTVLQQNTLNFDLSVEEIFPALLAGATLTPSREIFGSEGTENHGIDPTVLHLTAAHWHTLVAEWHKQPQVAEQRLQHVRLINVTGDALSAQKLKLWDEVRPAHTRLINTYGPTEATVSCTAAYVSHDAAAGSEGSGNATIGKPMANTRIYLLDAHQQPVPYGVAGEIYIGGDGVARGYLNLEEVNAERFLADPFSESPDARMYKTGDLARYMADGRIEY…	TTCGAAGCACAGGTACGTACGCAACCGGATGCCATCGCCGTGGCTTTCCAGGCGCAGCGCCTGAGCTATGCCGAACTGAACCGCCAGGCCAACCGTCTCGCTCATCACCTGATCGGCCTGGGCATCGGCCCGGATGATCGGGTGGCGATCTGCGTCGAACGCGGCGTGGAAATGATGGTCGGCCTGCTCGGTGTACTCAAAGCCGGTGCCGCTTATGTGCCGCTGGACCCGGCTTACCCTGCCGAGCGCCTGGCCTACATGATCGAAGACAGCCAGCCAGCGGCGTTACTGACCCAGCGTCACTTGCAGGAATATCTGCCGACCCTGACCTTGCCACTGGTGTTGCTCGACGATGATCAGCGCAAAACCTTTACCGAGCGTGACGATAACCCTGTGGTG…	CCCCCCCCC[C@@H](CC(=O)N[C@H]1COC(=O)[C@@H](NC(=O)[C@@H](NC(=O)/C(=C/C)/NC(=O)[C@@H](NC(=O)[C@@H](NC(=O)[C@@H](NC(=O)[C@H](NC(=O)[C@H](NC1=O)CO)CCN)CCN)CCCN=C(N)N)CC2=CC=CC=C2)[C@@H](C(=O)O)O)[C@@H](CCl)O)O	['Structure-based inference']	['pubmed:11277431', 'pubmed:12744455']
BGC0000437	NRP	Pseudomonas syringae pv. syringae B728a	syringomycin	nrpspksdomains_Psyr_2608_AMP-binding.4	2,4-diaminobutyric acid	dab	FEAQVRTQPDAIAVAVQGQRLSYADLNRQANRLAHHLISLGIVPDDRVAICVERGVEMMIGLLGVLKAGAAYVPLDPAYPAERLAYMITDSQPAALLTQRGLQERLPALSMPLVLLDDEQYQGLAECDDNPVVPTLGVRNLAYVIYTSGSTGNPKGVMIEHRGLVNYSVDAARLFDLSQSDTVLQQNTLNFDLSVEEIFPALLAGATLAPSREIFGSEGTETHGIQPTVLHLTTAHWHTLVAEWHNQPQAAEQRLQHVRLINVTGDALSAQKLKLWDEVRPAHTRLINTYGPTEATVSCTAAYVSYDAAAGSEGSGNATIGKPMANTRIYLLDAHQQPVPYGVAGEIYIGGDGVARGYLNLEEVNAERFLADPFSESPDARMYKTGDLARYMADGRIEY…	TTCGAAGCACAGGTCCGCACACAACCTGATGCCATCGCCGTGGCTGTCCAGGGGCAGCGCCTGAGCTATGCCGACTTGAACCGTCAGGCCAACCGTCTCGCTCATCACCTGATCAGCCTGGGCATTGTTCCGGATGATCGGGTGGCGATCTGTGTCGAGCGTGGCGTGGAAATGATGATCGGCCTGCTCGGTGTGCTCAAGGCAGGGGCGGCTTATGTACCACTTGACCCGGCCTATCCGGCCGAGCGCCTGGCATACATGATCACCGACAGCCAGCCAGCGGCGTTGCTCACTCAGCGCGGCTTGCAGGAGCGCTTGCCCGCATTGTCCATGCCGCTGGTATTGCTCGATGACGAGCAATACCAGGGCTTGGCCGAGTGTGATGACAACCCGGTCGTA…	CCCCCCCCC[C@@H](CC(=O)N[C@H]1COC(=O)[C@@H](NC(=O)[C@@H](NC(=O)/C(=C/C)/NC(=O)[C@@H](NC(=O)[C@@H](NC(=O)[C@@H](NC(=O)[C@H](NC(=O)[C@H](NC1=O)CO)CCN)CCN)CCCN=C(N)N)CC2=CC=CC=C2)[C@@H](C(=O)O)O)[C@@H](CCl)O)O	['Structure-based inference']	['pubmed:11277431', 'pubmed:12744455']
BGC0000437	NRP	Pseudomonas syringae pv. syringae B728a	syringomycin	nrpspksdomains_Psyr_2608_AMP-binding.5	arginine	arg	FEERVQAQPDAIAVAFGAQRLSYAELNRQANRVAHHLISLGIKPDDRVAICVERGVEMLIGVLGVLKAGAAYVPLDPAYPAERLAYMIEDSTPSALLAQRDVQAHLPTLDLPLVLLDEDQRTTLSERGDNPVVETLGAHNLAYVIYTSGSTGVPKGVMVEHRGLFAVSAAWEQLYALHAPLNHLQMAGFSFDVFSADLIRSLAFGGTLVLCPRETLMDPPALYRLLSEESIGFADFVPAVLNALLGWVEETGHDLSFMRTVVCGSDIWTAHSARQLRKLCGDHVQIVQAYGVTEASIDSTCFEFEATSQVDGVLPIGRALANTRIYLLDELGQAVPPGVAGELYIGGAGIARGYLNLQQLTAERFMDNPFVAGERLYRSGDMARYRADGNIEFLGRNDS…	TTCGAAGAAAGGGTTCAGGCGCAGCCCGACGCCATCGCCGTGGCCTTCGGGGCGCAGCGCTTGAGCTATGCCGAATTGAACCGTCAGGCCAACCGTGTGGCTCACCATCTGATCAGCCTGGGAATCAAACCGGATGATCGGGTGGCGATCTGCGTCGAGCGTGGCGTGGAAATGCTGATCGGCGTGCTCGGTGTGCTCAAGGCCGGTGCTGCTTATGTGCCACTGGATCCGGCTTACCCCGCCGAGCGCCTGGCCTACATGATTGAAGACAGTACGCCGTCGGCACTGTTGGCCCAGCGTGATGTGCAGGCGCATCTGCCGACGCTGGACTTGCCGCTGGTGCTGCTCGATGAGGATCAGCGCACCACCCTCTCCGAGCGTGGCGACAACCCGGTGGTG…	CCCCCCCCC[C@@H](CC(=O)N[C@H]1COC(=O)[C@@H](NC(=O)[C@@H](NC(=O)/C(=C/C)/NC(=O)[C@@H](NC(=O)[C@@H](NC(=O)[C@@H](NC(=O)[C@H](NC(=O)[C@H](NC1=O)CO)CCN)CCN)CCCN=C(N)N)CC2=CC=CC=C2)[C@@H](C(=O)O)O)[C@@H](CCl)O)O	['Structure-based inference']	['pubmed:11277431', 'pubmed:12744455']
BGC0000437	NRP	Pseudomonas syringae pv. syringae B728a	syringomycin	nrpspksdomains_Psyr_2608_AMP-binding.6	phenylalanine	phe	FEAHAEAAPQAIAVRQGEQTLTYAELDSRANALAQHLRKHGVGPGTRVAILLDRSVELLASMLATLKCGAAYLALDRLAPEERLRFMLEDSEAIMLLSRSDLTAPDMTPRLDLDTLELSALNQEPVVPATEVAGETPACIIYTSGSTGVPKGVIVTHNGIVRLVQDNGYYDFSAEDRVAFSSNPAFDASTPEIWGALLNGGQSVIIEPQVLLEPVAFAALLKRHGVTAMISSTALFNLYAGLIPEALAGLRMIMCGGERADPASFRRVREHSAQVRLFNGYGPTEGTTCATSYEIFDVLPDTLSLPIGKPNANVRVYVLDARREPVPMGVVGEIYIGGTGVALGYLNRPELTAERFSEDPFSQQAGARLYRTGDLARWLPDGNLEYLARNDGQVKVR	TTCGAGGCCCATGCCGAAGCTGCACCGCAGGCAATTGCCGTCCGCCAGGGTGAGCAGACACTGACCTACGCTGAACTCGACAGCCGCGCCAATGCCCTGGCTCAGCACCTGCGCAAACACGGTGTGGGACCGGGAACCCGGGTGGCGATTCTGCTGGATCGTTCGGTGGAATTGCTGGCCAGCATGCTGGCCACCCTCAAATGCGGCGCGGCTTATCTGGCGCTGGATCGTCTGGCCCCTGAAGAGCGCCTGCGCTTCATGCTCGAGGACAGCGAAGCCATCATGCTGCTGAGCCGTAGCGACCTGACGGCACCTGACATGACGCCAAGGCTGGATCTGGACACACTGGAGCTGTCAGCGCTGAACCAAGAGCCAGTCGTGCCTGCAACTGAAGTCGCA…	CCCCCCCCC[C@@H](CC(=O)N[C@H]1COC(=O)[C@@H](NC(=O)[C@@H](NC(=O)/C(=C/C)/NC(=O)[C@@H](NC(=O)[C@@H](NC(=O)[C@@H](NC(=O)[C@H](NC(=O)[C@H](NC1=O)CO)CCN)CCN)CCCN=C(N)N)CC2=CC=CC=C2)[C@@H](C(=O)O)O)[C@@H](CCl)O)O	['Structure-based inference']	['pubmed:11277431', 'pubmed:12744455']
BGC0000437	NRP	Pseudomonas syringae pv. syringae B728a	syringomycin	nrpspksdomains_Psyr_2608_AMP-binding.7	threonine	thr	FEQFAAAHPQNIALVFGRHEVSYQALNRRANRLAHELLAQGVRPDDRVAILAERGTQMICAVLAVLKSGAAYVPLDPTYPTERLGYLLTDSAPVALLAQSACLDVLPAHSVPVLTLGADNDSADLADESLDRNPEPAALGLSREHLAYVIYTSGSTGLPKGVLVEHGNVARLFDATAGQFNFGHEDVWTLFHSFAFDFSVWEIWGALCYGGKLVIVPSEVARSPDDFYALVCEQQVTVLNQTPSAFRQFIQARERSPQEHALREVVFGGEALDFRSLQPWTARTPLSRTRLVNMYGITEITVHATYYPISQSEIDTAMPSLIGPALDDLCLRILDDYQQPVPVGVNGEIYIGGAGVARHYLNRTELNAERFIADPYALQSGARLYRTGDVAHYRSDGGV…	TTTGAACAGTTCGCCGCCGCCCATCCGCAGAACATCGCGCTGGTCTTTGGCCGGCATGAGGTGAGCTACCAGGCGCTCAATCGCCGAGCCAACCGCCTGGCCCATGAACTACTCGCCCAAGGCGTGCGCCCCGATGACCGGGTGGCGATCCTCGCAGAGCGTGGTACGCAGATGATCTGCGCAGTGCTGGCCGTGCTCAAGTCCGGTGCGGCCTACGTACCGCTGGACCCGACTTACCCCACCGAGCGTCTCGGCTACCTGCTGACAGACAGTGCGCCGGTGGCGTTGCTGGCCCAGTCGGCCTGCCTTGACGTGCTGCCGGCACACAGCGTGCCGGTACTGACCCTCGGCGCGGACAACGACAGTGCCGATTTGGCAGATGAATCACTGGACCGCAAC…	CCCCCCCCC[C@@H](CC(=O)N[C@H]1COC(=O)[C@@H](NC(=O)[C@@H](NC(=O)/C(=C/C)/NC(=O)[C@@H](NC(=O)[C@@H](NC(=O)[C@@H](NC(=O)[C@H](NC(=O)[C@H](NC1=O)CO)CCN)CCN)CCCN=C(N)N)CC2=CC=CC=C2)[C@@H](C(=O)O)O)[C@@H](CCl)O)O	['Structure-based inference']	['pubmed:11277431', 'pubmed:12744455']
BGC0000437	NRP	Pseudomonas syringae pv. syringae B728a	syringomycin	nrpspksdomains_Psyr_2608_AMP-binding.8	aspartic acid	asp	FEDQVRRNPDAVALVYEDRQLSYRQLNRRANHVARQLLQLGVQPDERVAICAERSLDMIVGLLGVLKSGAAYVPIDPAHPADRMAFMLQDSQPRALLTQGALSLPVGDTPLMLLDSAESLLAADDQAFDANPVVDGLTAENLAYVIYTSGSTGQSKGVMVEHRSVFNFWNVLTRTTHQHCPTPATVALNAGFFFDMSIKGISQLFSGHKLVIIPQLLRANGSELLDFLEAHQVHAFDSTPSQLDTLLSAGLLERSSYQPVSVLLGGEAINASTWEKLRNCPTIRFYNMYGPTECTVDATIDLIRDLGEKPSIGRPIANVQVHVLDARGEPAPLGVAGEIHIGGSGVARGYLNRDELSAERFIVDPFSDVANARLYKTGDLGRWLADGTLEYMGRNDFQV…	TTCGAAGACCAGGTCCGCCGCAATCCTGATGCCGTAGCGCTGGTCTATGAAGACCGCCAACTGAGCTATCGCCAGCTCAACCGCCGCGCCAACCACGTGGCCCGGCAGTTGCTGCAACTCGGTGTGCAGCCGGACGAGCGCGTGGCCATCTGCGCCGAACGCAGCCTGGACATGATTGTCGGCCTGCTGGGCGTGCTCAAGTCCGGTGCCGCCTACGTGCCGATTGACCCTGCCCACCCTGCTGACCGTATGGCCTTCATGCTGCAGGACAGTCAGCCGCGCGCGCTGCTGACGCAGGGCGCGCTCAGCCTGCCGGTCGGCGACACGCCGTTGATGCTGCTGGACAGCGCTGAATCGCTGCTCGCGGCGGATGATCAGGCGTTCGACGCCAATCCCGTG…	CCCCCCCCC[C@@H](CC(=O)N[C@H]1COC(=O)[C@@H](NC(=O)[C@@H](NC(=O)/C(=C/C)/NC(=O)[C@@H](NC(=O)[C@@H](NC(=O)[C@@H](NC(=O)[C@H](NC(=O)[C@H](NC1=O)CO)CCN)CCN)CCCN=C(N)N)CC2=CC=CC=C2)[C@@H](C(=O)O)O)[C@@H](CCl)O)O	['ATP-PPi exchange assay']	['pubmed:11277431', 'pubmed:12744455']
BGC0000437	NRP	Pseudomonas syringae pv. syringae B728a	syringomycin	nrpspksdomains_Psyr_2611_AMP-binding.1	threonine	thr	FSDRARQFPERTAVSDAARTLSYAQLDALSTKLAARLRDEGVTYGTRVGMYLPRSVDLVTSLLGILKAGGTYVPVDPQYPGKRVEHIVRDSELSLIIGDAANLPKISSLRVLALDELLSAPALQPAAQDTRIDPNNSTAYIIYTSGSTGEPKGVQVSHGNVSRLLESTQRAYGFNAQDVWSMFHSIGFDFSVWEIWGALAHGGQVAVVPYDISRSPAALRQWLADQRITVLSQTPSAFRGLDEADRGNTAPLALRYVVLGGEALPASVLRPWVERHGDQKPALINMYGITEATVHTTFKRVLAQDLETAAMVSLGKPLHGWRLHLLDANQAPVAAGTTGELYIEGAGVAQGYLNREALNVERFVELPGAVRAYRTGDLMTLESNGEYRYAGRCDEQLKIS	TTCAGTGACAGGGCGCGTCAATTTCCTGAGCGCACCGCGGTGAGCGATGCAGCCCGGACGTTGAGCTACGCACAGCTCGACGCGCTGTCGACAAAGCTGGCTGCACGTTTACGCGATGAAGGCGTGACCTACGGCACGCGTGTGGGCATGTACCTGCCGCGCAGCGTCGATCTGGTCACCAGCCTGCTGGGTATTCTCAAAGCCGGCGGCACCTATGTGCCGGTCGACCCGCAATACCCTGGCAAACGCGTCGAGCACATCGTGCGCGACAGCGAGCTGAGCCTGATCATCGGCGATGCCGCCAACCTGCCGAAAATATCGTCTCTGCGCGTATTGGCACTCGACGAGTTACTGTCCGCGCCGGCGCTGCAACCGGCCGCTCAAGACACCCGTATCGAC…	CCCCCCCCC[C@@H](CC(=O)N[C@H]1COC(=O)[C@@H](NC(=O)[C@@H](NC(=O)/C(=C/C)/NC(=O)[C@@H](NC(=O)[C@@H](NC(=O)[C@@H](NC(=O)[C@H](NC(=O)[C@H](NC1=O)CO)CCN)CCN)CCCN=C(N)N)CC2=CC=CC=C2)[C@@H](C(=O)O)O)[C@@H](CCl)O)O	['ATP-PPi exchange assay', 'Structure-based inference']	['pubmed:11277431', 'pubmed:12744455']
BGC0000438	NRP	Pseudomonas syringae pv. syringae	syringopeptin 25A	nrpspksdomains_sypA_AMP-binding.1	threonine	thr	FEARAAERPDAAALVFEEQTLSYGELNARANQVAHRLLALGVRPDDRVAICVERGPAMIIGLLGILKSGAGYVPLDPAYPLERLAYTLGDSAPVALLSQQSVQPALPVSDVPLIYLDDVDLQDERACNPQVSVRPSDLAYVIYTSGSTGLPKGVMVEHRNVARLFSATQDWFGFNEQDVWALFHSFAFDFSVWEIWGALLHGGRLLIVPQLVSRSPEDFYNLLCSAGVTVLNQTPSAFRQLIAAQDDKEQVHSLRQVIFGGEALETAMLKPWYARKVNASTQLVNMYGITETTVHVTYYPLQPEDARRVGASPIGKRIPDLQLYLLDAYGHPLPPGAVGELYVGGAGVARGYLNRDELNTTRFLDDPFASAPGARMYRSGDLGRWLPDGSLEYLGRNDE…	TTTGAAGCTCGCGCCGCAGAACGCCCGGACGCCGCTGCACTGGTGTTCGAAGAGCAGACCCTGAGCTACGGCGAGCTCAACGCGCGTGCCAATCAGGTTGCCCATCGTCTTTTGGCCTTGGGGGTACGCCCTGACGATCGCGTGGCCATCTGCGTCGAACGCGGCCCGGCAATGATTATCGGCTTGCTGGGCATCCTCAAATCCGGCGCAGGTTATGTGCCGCTGGACCCGGCTTACCCGCTTGAGCGTCTGGCCTACACCCTCGGCGACAGTGCGCCGGTAGCATTGTTGAGCCAGCAGTCAGTACAGCCGGCATTGCCGGTGTCGGATGTGCCGCTTATCTATCTCGATGATGTCGACCTGCAGGACGAGCGCGCCTGCAATCCGCAGGTATCGGTC…	CCCCCCCC(CC(=N/C(=C\C)/C(=O)N1CCC[C@H]1C(=N[C@@H](C(C)C)C(=N[C@@H](C)C(=N[C@@H](C)C(=N[C@@H](C(C)C)C(=N[C@@H](CC(C)C)C(=N[C@@H](C)C(=N[C@@H](C)C(=N/C(=C\C)/C(=N[C@@H](C(C)C)C(=N/C(=C\C)/C(=N[C@@H](C)C(=N[C@@H](C(C)C)C(=N[C@@H](C)C(=N[C@@H](C)C(=N/C(=C\C)/C(=N[C@H]2C(OC(=O)[C@@H](N=C([C@@H](N=C([C@@H](N=C([C@@H](N=C([C@@H](N=C([C@@H](N=C([C@@H](N=C2O)CO)O)C)O)C(C)C)O)C)O)CCN)O)CCN)O)CC3=CC=C(C=C3)…	[]	['pubmed:11277431', 'pubmed:12744455']
BGC0000438	NRP	Pseudomonas syringae pv. syringae	syringopeptin 25A	nrpspksdomains_sypA_AMP-binding.2	proline	pro	FEAQAAAQPDSVAVTYQGQRLSYAELNQWANQIAHRLIAAGVGADDRVAICVERSLEMIAGLVGILKAGAGYVPLDPSYPEERLAYMLEDSAPKMLLTQRGLRERFAQASMPVLLLEADARAENGIDRAPVTNPHPAGLGAQHLAYLIYTSGSTGQPKGVAMPHAPLVNLMQWQIAQSVEDSRPRQRTLQFAALGFDVAFQEIFSTLCAGGELSLIHADTRLNFRRLFEHICEQRIERLYMPCIALQALAEAVVTEPEQPECLLQDVITAGEQLRITEPMRQFFARLNDARLHNHYGPTESHVVTALTLDGDPQTWPTLPSIGQPVANTRIYLLDEHMRPVPVGVAGELYIGGACVARGYLNRNDLTAERFIADPFAASDAGNPRTRLYKTGDLGCWQA…	TTCGAGGCCCAGGCGGCTGCGCAACCGGATTCGGTGGCGGTCACCTACCAAGGCCAGCGCCTGAGCTACGCCGAGCTCAATCAGTGGGCCAACCAGATTGCCCACCGGTTGATCGCTGCAGGCGTTGGCGCTGATGACCGCGTAGCGATCTGTGTGGAACGCAGTCTGGAAATGATCGCCGGCCTGGTGGGCATTCTCAAGGCCGGCGCAGGCTACGTGCCACTTGACCCTTCCTACCCTGAAGAACGCCTGGCCTACATGCTCGAGGACAGCGCACCGAAAATGCTGCTGACCCAACGTGGTTTGCGCGAGCGCTTTGCGCAGGCCTCCATGCCGGTGCTGCTGCTGGAAGCTGACGCCCGCGCCGAGAACGGTATCGACCGCGCGCCGGTGACCAAT…	CCCCCCCC(CC(=N/C(=C\C)/C(=O)N1CCC[C@H]1C(=N[C@@H](C(C)C)C(=N[C@@H](C)C(=N[C@@H](C)C(=N[C@@H](C(C)C)C(=N[C@@H](CC(C)C)C(=N[C@@H](C)C(=N[C@@H](C)C(=N/C(=C\C)/C(=N[C@@H](C(C)C)C(=N/C(=C\C)/C(=N[C@@H](C)C(=N[C@@H](C(C)C)C(=N[C@@H](C)C(=N[C@@H](C)C(=N/C(=C\C)/C(=N[C@H]2C(OC(=O)[C@@H](N=C([C@@H](N=C([C@@H](N=C([C@@H](N=C([C@@H](N=C([C@@H](N=C([C@@H](N=C2O)CO)O)C)O)C(C)C)O)C)O)CCN)O)CCN)O)CC3=CC=C(C=C3)…	[]	['pubmed:11277431', 'pubmed:12744455']
BGC0000438	NRP	Pseudomonas syringae pv. syringae	syringopeptin 25A	nrpspksdomains_sypA_AMP-binding.3	valine	val	FEAQVRAHPEACAAIHDGVAVSYAELNNRANRLARHLLGLGVQPGDSVAILLERSHDLLASQLAVLKCAAVYVPLDVNAPVERQTFMIEDSQAHVLLTLSRMSLTASTQRIDLDGLTLDGLKDTDLTLPQSSESVAYIMYTSGSTGVPKGVLVPHRAISRLVINNGYADFNAQDRVAFASNPAFDASTLDVWAPLLNGGCVVVIGQHDLLSPLNFQRLLLEQSVSVLWMTAGLFHQYATGLGEAFSRLRYLIVGGDVLDPAVIARVLANNAPQHLLNGYGPTEATTFSATYEITSVDNGSIPIGKPVGNTRLYVLDSQGQPAPLGVAGELYIGGQGVARGYLHRDELTLEKFLADPFDSDPQARLYRTGDLVRWRADGNLEYLGRNDDQVKIR	TTCGAAGCTCAGGTGCGTGCGCACCCAGAAGCTTGCGCGGCGATCCACGACGGCGTTGCCGTGAGCTACGCCGAACTCAACAACAGAGCCAACCGCCTGGCGCGGCATCTGCTGGGGCTCGGTGTGCAGCCGGGTGACAGCGTGGCGATCCTGCTGGAACGCAGCCATGATTTGCTCGCCAGTCAGCTGGCAGTGCTCAAGTGCGCGGCGGTGTACGTGCCGCTGGACGTCAACGCGCCTGTAGAGCGACAGACGTTCATGATCGAGGACAGCCAGGCGCATGTCCTGCTGACCCTCAGCCGGATGTCGCTGACAGCCAGCACTCAGCGTATCGATCTCGACGGCCTGACCCTGGACGGTCTGAAAGACACTGATCTGACATTACCGCAGTCCAGCGAA…	CCCCCCCC(CC(=N/C(=C\C)/C(=O)N1CCC[C@H]1C(=N[C@@H](C(C)C)C(=N[C@@H](C)C(=N[C@@H](C)C(=N[C@@H](C(C)C)C(=N[C@@H](CC(C)C)C(=N[C@@H](C)C(=N[C@@H](C)C(=N/C(=C\C)/C(=N[C@@H](C(C)C)C(=N/C(=C\C)/C(=N[C@@H](C)C(=N[C@@H](C(C)C)C(=N[C@@H](C)C(=N[C@@H](C)C(=N/C(=C\C)/C(=N[C@H]2C(OC(=O)[C@@H](N=C([C@@H](N=C([C@@H](N=C([C@@H](N=C([C@@H](N=C([C@@H](N=C([C@@H](N=C2O)CO)O)C)O)C(C)C)O)C)O)CCN)O)CCN)O)CC3=CC=C(C=C3)…	[]	['pubmed:11277431', 'pubmed:12744455']
BGC0000438	NRP	Pseudomonas syringae pv. syringae	syringopeptin 25A	nrpspksdomains_sypA_AMP-binding.4	valine	val	FEAQAERTPEATAVAHDATTLSYHELNLQANRLAAKLLELGVQPGHSVALLLPRSIDLVLSQLAVLKCAAIYVPLDINAPQERQTFMVQDSQAVLVLTYSTETLDPGTQRLDLDTRPASTVPADNPNPEACADSVAYIMYTSGSTGTPKGVLVPHRAISRLVIDNGYADFNGQDRVAFASNPAFDASTLDVWAPLLNGGCVIVVEQSVLLSQEAFRALLLAQSISVLWLTAGLFHQYADGLMEVFAGLRYLIVGGDVLDPAVIARVLAQGAPQHLLNGYGPTEATTFSTTYEITAADHGGIPIGRPIANSQVYVLDALRQPVAVGVPGELYIGGQGVAKGYLNRDELSTTQFVADPFSGHDGALMYRTGDLGRWRADGNLEYLGRNDGQVKIR	TTCGAGGCTCAGGCTGAGCGCACGCCTGAAGCCACGGCAGTAGCGCATGATGCGACGACTCTGAGTTACCACGAGCTGAACCTTCAGGCCAACCGTCTGGCGGCAAAACTGCTGGAGCTGGGCGTGCAGCCGGGGCACAGCGTCGCGCTGCTGTTGCCACGCTCCATCGACCTGGTGCTCAGCCAGCTTGCTGTGCTCAAGTGTGCGGCTATCTACGTACCGCTGGACATCAATGCCCCGCAGGAGCGTCAGACCTTCATGGTGCAAGACAGCCAGGCGGTGCTGGTGCTGACCTACAGCACTGAAACCCTGGATCCGGGCACGCAGCGTCTGGACCTGGACACCCGGCCAGCGAGCACGGTGCCGGCAGACAACCCGAATCCAGAGGCCTGCGCCGAT…	CCCCCCCC(CC(=N/C(=C\C)/C(=O)N1CCC[C@H]1C(=N[C@@H](C(C)C)C(=N[C@@H](C)C(=N[C@@H](C)C(=N[C@@H](C(C)C)C(=N[C@@H](CC(C)C)C(=N[C@@H](C)C(=N[C@@H](C)C(=N/C(=C\C)/C(=N[C@@H](C(C)C)C(=N/C(=C\C)/C(=N[C@@H](C)C(=N[C@@H](C(C)C)C(=N[C@@H](C)C(=N[C@@H](C)C(=N/C(=C\C)/C(=N[C@H]2C(OC(=O)[C@@H](N=C([C@@H](N=C([C@@H](N=C([C@@H](N=C([C@@H](N=C([C@@H](N=C([C@@H](N=C2O)CO)O)C)O)C(C)C)O)C)O)CCN)O)CCN)O)CC3=CC=C(C=C3)…	[]	['pubmed:11277431', 'pubmed:12744455']
BGC0000438	NRP	Pseudomonas syringae pv. syringae	syringopeptin 25A	nrpspksdomains_sypA_AMP-binding.5	alanine	ala	FEAQAERTPEALAVVHGKQRLTYRALNEQANRLAHALIKQGVQPDSRVGICVERGAEMVVGLLAILKAGGGYVPLDPAYPVERIAYMLQDSAPAAVLVQTATQRLLADTSVPLIHLDLSDWQDESVQNPRVPGLTSAHLAYLIYTSGSTGLPKGVMIEHRNTVNFLTWAHAAFDAGTNNSALEKTLFSTSLNFDLAVYECFAPLTSGGSIEVVRNVLELQHLDDDIRLINTVPSALKALLETDGLPKSVHTVNVAGEALKRSLVEALFEQTGVQRLCNLYGPSETTTYSSWVAMDREDGFAAHIGKPVGNTRFYLLDEQQQPVPRGVAGEIYIGGAGVARGYRNRDDLTAERFLKDPFSPQPAARMYHTGDLGRYLPDGNIQYLGRNDDQVKIR	TTCGAAGCACAGGCCGAGCGCACGCCGGAAGCGCTGGCAGTAGTCCACGGCAAACAGCGCCTGACGTATCGCGCGCTCAACGAGCAGGCCAACCGCCTGGCCCATGCGTTAATCAAGCAGGGTGTTCAGCCGGATTCCAGAGTCGGAATCTGTGTTGAACGCGGCGCGGAAATGGTCGTCGGTTTGCTGGCGATTCTCAAGGCGGGCGGCGGTTACGTACCGCTGGATCCGGCGTATCCGGTGGAACGAATTGCTTACATGTTGCAGGACAGCGCTCCGGCAGCCGTGCTGGTTCAAACCGCTACACAACGTTTGCTGGCGGACACTTCGGTGCCCCTCATCCATCTTGATCTGAGCGATTGGCAGGACGAATCCGTCCAGAATCCGCGGGTGCCGGGG…	CCCCCCCC(CC(=N/C(=C\C)/C(=O)N1CCC[C@H]1C(=N[C@@H](C(C)C)C(=N[C@@H](C)C(=N[C@@H](C)C(=N[C@@H](C(C)C)C(=N[C@@H](CC(C)C)C(=N[C@@H](C)C(=N[C@@H](C)C(=N/C(=C\C)/C(=N[C@@H](C(C)C)C(=N/C(=C\C)/C(=N[C@@H](C)C(=N[C@@H](C(C)C)C(=N[C@@H](C)C(=N[C@@H](C)C(=N/C(=C\C)/C(=N[C@H]2C(OC(=O)[C@@H](N=C([C@@H](N=C([C@@H](N=C([C@@H](N=C([C@@H](N=C([C@@H](N=C([C@@H](N=C2O)CO)O)C)O)C(C)C)O)C)O)CCN)O)CCN)O)CC3=CC=C(C=C3)…	[]	['pubmed:11277431', 'pubmed:12744455']
BGC0000438	NRP	Pseudomonas syringae pv. syringae	syringopeptin 25A	nrpspksdomains_sypB_AMP-binding.1	alanine	ala	FEAQVERTPEGVAVVHGEQRLTYRELNQQANRLAHALIKQGVQPDSRVGICVERGADMVVGLLAILKAGGGYVPLDPAYPAERIAYMLQDSVPAAVLAQTATQGLLADVSVPVINLDLSVWQDESVQNPQVPGLTSAHLAYLIYTSGSTGLPKGVMIEHRNTVNFLTWAHTAFDGSALEKTLFSTSLNFDLAVYECFAPLTSGGSIEVVKNVLELQHGEHDIGLINTVPSALKALLEVNGLPESVHTVNVAGEALKQSLVESLFENTGVQRLCNLYGPSETTTYSSWVAMDREHGFAAHIGKPVGNTQFYLLDEQQQPVPLGVAGEIYIGGAGVARGYLNRDDLTAERFLKDPFSQQSAARMYRTGDLGRYLPDGNIEYLGRNDDQVKIR	TTCGAGGCCCAGGTCGAGCGCACGCCGGAAGGGGTGGCAGTGGTCCACGGCGAACAGCGCCTGACGTATCGCGAGCTTAACCAACAGGCCAACCGCCTGGCCCATGCGTTGATTAAGCAGGGGGTTCAGCCGGATTCCCGCGTCGGCATCTGCGTTGAGCGCGGTGCGGATATGGTCGTCGGCTTGCTGGCGATCCTCAAGGCGGGCGGCGGTTATGTACCGCTCGACCCGGCTTATCCGGCAGAGCGAATTGCCTACATGTTGCAGGACAGTGTGCCTGCCGCAGTACTGGCTCAAACCGCGACTCAGGGCCTGCTGGCCGACGTTTCGGTACCTGTCATCAATCTTGATCTGAGCGTTTGGCAGGACGAATCCGTCCAGAATCCGCAGGTGCCAGGG…	CCCCCCCC(CC(=N/C(=C\C)/C(=O)N1CCC[C@H]1C(=N[C@@H](C(C)C)C(=N[C@@H](C)C(=N[C@@H](C)C(=N[C@@H](C(C)C)C(=N[C@@H](CC(C)C)C(=N[C@@H](C)C(=N[C@@H](C)C(=N/C(=C\C)/C(=N[C@@H](C(C)C)C(=N/C(=C\C)/C(=N[C@@H](C)C(=N[C@@H](C(C)C)C(=N[C@@H](C)C(=N[C@@H](C)C(=N/C(=C\C)/C(=N[C@H]2C(OC(=O)[C@@H](N=C([C@@H](N=C([C@@H](N=C([C@@H](N=C([C@@H](N=C([C@@H](N=C([C@@H](N=C2O)CO)O)C)O)C(C)C)O)C)O)CCN)O)CCN)O)CC3=CC=C(C=C3)…	[]	['pubmed:11277431', 'pubmed:12744455']
BGC0000438	NRP	Pseudomonas syringae pv. syringae	syringopeptin 25A	nrpspksdomains_sypB_AMP-binding.2	valine	val	FEAQVRAYPEACAAIHDCVAVSYAELNTRANRLARHLLGLGVQPGDSVAILLERSHDLLASQLAVLKCAAVYVPLDINAPVERQSFMIEDSRARVLLTHSQVSLTTSAQRIDLDGLTLERLKGTDLALPPQSSESVAYIMYTSGSTGTPKGVLVPHRAISRLAINNGYADFNAQDRVAFASNPAFDASTLDVWAPLLNGGCVVVIGQHDLLSPLNFQRLLLEQSVSVLWMTAGLFHQYASGLGEAFSRLRYLIVGGDVLDPAVIGRVLANNPPQHLLNGYGPTEATTFSATYEIVSVGNGSIPIGKPVGNSRLYVLDNQGQPVPLGVPGELYIGGQGVARGYLHRDELTLERFVADPFDSDPQARLYRTGDLVRWRADGNLEYLGRNDEQVKIR	TTCGAAGCTCAGGTGCGTGCGTACCCCGAGGCTTGCGCGGCGATCCACGATTGTGTTGCCGTGAGCTACGCCGAACTCAACACCCGGGCCAATCGCCTGGCGCGGCATCTGCTGGGGCTCGGTGTGCAGCCAGGTGACAGCGTGGCGATCCTGCTGGAACGCAGCCATGATTTGCTCGCCAGTCAACTGGCAGTGCTCAAGTGCGCGGCGGTATATGTACCGCTGGACATCAACGCACCGGTCGAGCGCCAGAGTTTCATGATTGAAGACAGCCGGGCTCGTGTCCTGCTGACTCACAGTCAGGTATCGCTGACAACAAGCGCCCAGCGTATTGACCTCGATGGCCTGACGCTGGAGCGTCTGAAAGGCACTGATCTGGCATTGCCGCCGCAGTCCAGC…	CCCCCCCC(CC(=N/C(=C\C)/C(=O)N1CCC[C@H]1C(=N[C@@H](C(C)C)C(=N[C@@H](C)C(=N[C@@H](C)C(=N[C@@H](C(C)C)C(=N[C@@H](CC(C)C)C(=N[C@@H](C)C(=N[C@@H](C)C(=N/C(=C\C)/C(=N[C@@H](C(C)C)C(=N/C(=C\C)/C(=N[C@@H](C)C(=N[C@@H](C(C)C)C(=N[C@@H](C)C(=N[C@@H](C)C(=N/C(=C\C)/C(=N[C@H]2C(OC(=O)[C@@H](N=C([C@@H](N=C([C@@H](N=C([C@@H](N=C([C@@H](N=C([C@@H](N=C([C@@H](N=C2O)CO)O)C)O)C(C)C)O)C)O)CCN)O)CCN)O)CC3=CC=C(C=C3)…	[]	['pubmed:11277431', 'pubmed:12744455']
BGC0000438	NRP	Pseudomonas syringae pv. syringae	syringopeptin 25A	nrpspksdomains_sypB_AMP-binding.3	valine	val	FEAQVRNNPEACAAIHDGVALSYTELNTRANRLAQHLLGLGVQPGDSVAILLERSHDLLASQLAVLKCAAVYVPLDVNAPVERQAFMIEDSQASVLLTLSQMSLTTSTQRVDLDRLMLNGLDNDDLALAQSSESVAYIMYTSGSTGTPKGVLVPHRAISRLVINNGYADFNAQDRVAFASNPAFDASTLDVWAPLLNGGCVVVIGQHDLLSPLNFQRLLLEQSVTVLWMTAGLFHQYASGLGEAFSRLRYLIVGGDVLDPAVIARVLANNAPQHLLNGYGPTEATTFSATYEIVSVDNGSIPIGKPVGNTRLYVLDSQGQPVPLGVPGELYIGGQGVAKGYLNRDELSTTQFVVDPFSEQIDALMYRTGDLVRWRADGNLEYLGRNDDQVKIR	TTCGAAGCACAGGTCCGTAACAACCCGGAAGCTTGCGCCGCAATCCACGACGGCGTTGCCTTGAGTTATACCGAACTCAACACCCGGGCCAACCGTCTGGCGCAGCATCTGCTGGGGCTTGGCGTACAGCCGGGTGACAGCGTGGCGATACTGCTGGAACGCAGCCATGATTTGCTCGCCAGCCAGCTGGCAGTACTCAAATGCGCAGCGGTGTATGTACCACTGGACGTCAACGCTCCGGTAGAGCGCCAGGCGTTCATGATCGAGGACAGTCAGGCGAGTGTCCTGCTGACTCTCAGTCAGATGTCGCTGACAACCAGCACTCAGCGCGTCGACCTTGACCGCCTGATGCTAAACGGCCTGGATAACGATGATCTGGCGCTTGCGCAGTCCAGCGAA…	CCCCCCCC(CC(=N/C(=C\C)/C(=O)N1CCC[C@H]1C(=N[C@@H](C(C)C)C(=N[C@@H](C)C(=N[C@@H](C)C(=N[C@@H](C(C)C)C(=N[C@@H](CC(C)C)C(=N[C@@H](C)C(=N[C@@H](C)C(=N/C(=C\C)/C(=N[C@@H](C(C)C)C(=N/C(=C\C)/C(=N[C@@H](C)C(=N[C@@H](C(C)C)C(=N[C@@H](C)C(=N[C@@H](C)C(=N/C(=C\C)/C(=N[C@H]2C(OC(=O)[C@@H](N=C([C@@H](N=C([C@@H](N=C([C@@H](N=C([C@@H](N=C([C@@H](N=C([C@@H](N=C2O)CO)O)C)O)C(C)C)O)C)O)CCN)O)CCN)O)CC3=CC=C(C=C3)…	[]	['pubmed:11277431', 'pubmed:12744455']
BGC0000438	NRP	Pseudomonas syringae pv. syringae	syringopeptin 25A	nrpspksdomains_sypB_AMP-binding.4	threonine	thr	FEARAAARPDAVALVFEAQTLSYGELNARANQVAHRLLALGVRPDDRVAICVERDPAMIIGLLGILKSGAGYVPLDPAYPPERLAYTLGDSTPVALLSQQSVQQALPVSQVPVIYLDDAGLQDESVDNPQISVKPDNLAYVIYTSGSTGLPKGVMVEHRNVARLFSATEDWFGFNEQDVWALFHSFAFDFSVWEIWGALLHGGRLLIVPQLVSRSPEDFYTLLCSTAVTVLNQTPSAFRQLITAQGENQQAHSLRQVIFGGEALETAMLKPWYARNVNAATQLVNMYGITETTVHVTYYPLQPEDAQRVGASPIGTRIPDLQLYLLDTCGEPVPVGVVGELYVGGAGVARGYLNREALTAERFIDNPFNTAPGARLYRTGDLGRWLADGTLEYLGRNDE…	TTCGAAGCCCGTGCCGCAGCACGGCCCGACGCCGTGGCACTGGTGTTCGAAGCGCAGACCCTGAGCTACGGCGAGCTCAACGCACGTGCCAACCAGGTCGCTCATCGCTTGCTGGCGTTGGGTGTGCGCCCGGATGATCGCGTGGCGATCTGCGTGGAACGTGACCCGGCGATGATTATCGGCTTGCTGGGCATCCTCAAATCCGGCGCTGGTTACGTGCCACTGGACCCGGCTTATCCCCCTGAGCGTCTGGCCTACACCCTCGGCGACAGCACGCCGGTGGCGTTGTTGAGCCAGCAGTCAGTGCAGCAAGCGTTGCCGGTGTCGCAAGTGCCGGTGATCTATCTCGACGATGCCGGTTTGCAGGACGAATCCGTCGACAATCCGCAGATTTCGGTC…	CCCCCCCC(CC(=N/C(=C\C)/C(=O)N1CCC[C@H]1C(=N[C@@H](C(C)C)C(=N[C@@H](C)C(=N[C@@H](C)C(=N[C@@H](C(C)C)C(=N[C@@H](CC(C)C)C(=N[C@@H](C)C(=N[C@@H](C)C(=N/C(=C\C)/C(=N[C@@H](C(C)C)C(=N/C(=C\C)/C(=N[C@@H](C)C(=N[C@@H](C(C)C)C(=N[C@@H](C)C(=N[C@@H](C)C(=N/C(=C\C)/C(=N[C@H]2C(OC(=O)[C@@H](N=C([C@@H](N=C([C@@H](N=C([C@@H](N=C([C@@H](N=C([C@@H](N=C([C@@H](N=C2O)CO)O)C)O)C(C)C)O)C)O)CCN)O)CCN)O)CC3=CC=C(C=C3)…	[]	['pubmed:11277431', 'pubmed:12744455']
BGC0000438	NRP	Pseudomonas syringae pv. syringae	syringopeptin 25A	nrpspksdomains_sypB_AMP-binding.5	alanine	ala	FEAQVQRTPQALAVVHGMQRITYRELNEQANRLANALRKQGVQPDSRVGICVERGAQMVVGLLAILKAGGGYVPLDPAYPAERISYILQDSAPAAVLVQAATRHLLAGVSVQAIDLDDQSAWQDEPVQNPDVEGLSSAHLAYLIYTSGSTGLPKGVMIEHRNTVNFLTWAHHAFNGSALEKTLFSTSLNFDLAVYECFAPLTSGGSINVVKNVLELQHGEHDIGLVNTVPSALKALLEINGLPESVHTVNVAGEALKRSLVENLFEKTGVQRLCNLYGPSETTTYSSWVAMDREDGFAAHIGRPVGNTRFYLLDEQQQLVPRGVPGEIYIGGAGVARGYLNRDDLTAERFLTDPFSLTPGARMYRTGDLGRYLPDGNIEYLGRNDDQVKIR	TTCGAAGCGCAGGTGCAGCGTACTCCGCAAGCGCTGGCAGTGGTCCATGGCATGCAGCGCATTACATATCGCGAGCTTAACGAGCAGGCCAACCGCTTGGCGAATGCCTTGCGCAAGCAGGGCGTTCAGCCGGATTCTCGCGTCGGCATCTGCGTTGAACGCGGCGCACAAATGGTCGTCGGCTTGCTGGCGATCCTCAAGGCGGGGGGTGGTTATGTACCGCTGGATCCGGCCTATCCGGCGGAGCGGATTTCGTACATCCTGCAGGACAGCGCGCCAGCGGCGGTGCTGGTCCAGGCGGCGACCCGGCATTTGCTGGCAGGCGTTTCGGTGCAGGCCATCGACCTTGATGATCAGAGCGCCTGGCAAGACGAGCCGGTACAGAATCCAGACGTCGAG…	CCCCCCCC(CC(=N/C(=C\C)/C(=O)N1CCC[C@H]1C(=N[C@@H](C(C)C)C(=N[C@@H](C)C(=N[C@@H](C)C(=N[C@@H](C(C)C)C(=N[C@@H](CC(C)C)C(=N[C@@H](C)C(=N[C@@H](C)C(=N/C(=C\C)/C(=N[C@@H](C(C)C)C(=N/C(=C\C)/C(=N[C@@H](C)C(=N[C@@H](C(C)C)C(=N[C@@H](C)C(=N[C@@H](C)C(=N/C(=C\C)/C(=N[C@H]2C(OC(=O)[C@@H](N=C([C@@H](N=C([C@@H](N=C([C@@H](N=C([C@@H](N=C([C@@H](N=C([C@@H](N=C2O)CO)O)C)O)C(C)C)O)C)O)CCN)O)CCN)O)CC3=CC=C(C=C3)…	[]	['pubmed:11277431', 'pubmed:12744455']
BGC0000443	NRP	Pseudomonas sp. SHC52	thanamycin	nrpspksdomains_AED90002.1_AMP-binding.1	serine	ser	FEQQAEQRPHNCAVRGDSGPLLSYEQLNRQANQLAHRLIELGVKPDDRVAVSLKRGPEMVVALLGILKAGGAYVPIDPDLPSARQAYMLDDSRPRAVLSSRALLEQLPALAIPVLVLDDDERVEQPEHNPDPRTLGLTTKHLAYVLYTSGSTGTPKGVMNEHLGVVNRLLWARDQYGVDASDRILQKTPFGFDVSVWEFFLPLLAGAELVMARPGGHQEPDYLARVMREASITMLHFVPSMLDLFLEHRDSQDFPALRRVLCSGEALPRALQRRFERQLTGVELHNLYGPTEAAIDVTAWHCRPGDPGESVPIGKPIANIQMHVLDARGKPQPLGIAGEIHIGGIGVARGYLNQPELSAERFIADPFSNEQDARLYKTGDLGRWLANGALEYLGRNDFQ…	TTCGAACAGCAGGCCGAGCAACGTCCCCATAACTGTGCCGTACGCGGCGACAGCGGGCCGCTGCTCAGCTACGAACAACTCAACCGCCAGGCCAACCAGCTCGCTCATCGCCTGATCGAACTGGGGGTCAAGCCGGATGACCGCGTGGCCGTGAGCCTCAAGCGCGGCCCGGAAATGGTCGTCGCCCTGCTGGGGATTCTCAAGGCCGGTGGCGCTTACGTGCCCATCGACCCGGACCTGCCGAGCGCACGCCAGGCCTACATGCTCGACGACAGTCGTCCCCGTGCCGTACTCAGTAGCCGGGCCTTGCTGGAGCAGTTGCCGGCGTTGGCAATCCCGGTGCTGGTGCTCGATGACGACGAGCGTGTCGAACAGCCCGAACACAACCCGGACCCTCGC…	CCCCCCCCCCCCC(C(CC(=O)NC1COC(=O)C(NC(=O)C(NC(=O)/C(=C\C)/NC(=O)C(CC(=O)C(NC(=O)C(NC(=O)C(NC(=O)C(NC1=O)(CCCN)O)CC(=O)O)CCO)CC2=C3C=CNC3=CC=C2)C(C)O)C(C(=O)O)O)C(CCl)O)O)O	['Sequence-based prediction']	['pubmed:21551032', 'pubmed:22586093', 'pubmed:22121884']
BGC0000443	NRP	Pseudomonas sp. SHC52	thanamycin	nrpspksdomains_AED90002.1_AMP-binding.2	arginine	arg	FEQHVQKRPQAIAVQAEGVNLSYAELNTRANRIAHRLIAAGLRPDERVALLVERSPEMIIGILAILKAGGAYVPLDPNYPQDRLQHMLDDSTPRVLLTQSYLIETMAEQLPALHMPQLLLDDSTDGDDRNPRVEGLTSRHLAYVMYTSGSTGKPKGVMLEHRSVCNQIGALQERYGLNPQDRILQFATMTFDMSVEEIFGALLSGATLVLRSDAWIAGTAAFAALCEQHAISVANLPTVFWQQVARDAHVALPVCLRQFMIGGEAVGKQAVSQWFARAGHRPALFNAYGPTEATVNASIRRMESEHDDFRSIGKPLRSTQLHVLDALGNLVPLGVAGEIHIGGVGVARGYLNRHELTAERFIADPFSTDPDARLYKTGDLGRWCADGTLQYLGRNDDQV…	TTCGAACAGCACGTACAGAAGCGTCCCCAAGCCATCGCCGTCCAGGCCGAAGGGGTCAACCTCAGCTATGCCGAACTCAACACCCGGGCCAATCGCATTGCCCATCGCCTGATCGCCGCGGGCCTGCGTCCGGATGAACGAGTCGCCCTGTTGGTGGAACGCAGCCCGGAAATGATCATCGGCATCCTGGCCATTCTCAAGGCCGGCGGCGCCTACGTGCCGCTGGACCCGAACTACCCGCAGGACCGCTTGCAGCACATGCTCGACGACAGCACGCCGCGGGTCCTGCTCACCCAGAGCTACCTGATCGAAACCATGGCCGAACAACTGCCGGCGCTGCACATGCCGCAGCTGTTGCTCGACGACTCGACTGATGGCGATGATCGCAATCCAAGGGTC…	CCCCCCCCCCCCC(C(CC(=O)NC1COC(=O)C(NC(=O)C(NC(=O)/C(=C\C)/NC(=O)C(CC(=O)C(NC(=O)C(NC(=O)C(NC(=O)C(NC1=O)(CCCN)O)CC(=O)O)CCO)CC2=C3C=CNC3=CC=C2)C(C)O)C(C(=O)O)O)C(CCl)O)O)O	['Sequence-based prediction']	['pubmed:21551032', 'pubmed:22586093', 'pubmed:22121884']
BGC0000443	NRP	Pseudomonas sp. SHC52	thanamycin	nrpspksdomains_AED90002.1_AMP-binding.3	aspartic acid	asp	FEAQVHANPDAVALVCEERQLSYRQLNRRANHLARQLLALGVQPDQRVAICAERSLEMIVGLLGVLKAGAAYVPIDPAHPAERIAFMLQDSQPQALLTQSALSLPSGELPVVLLDIVESLQAADDAAFDSNPQVPGLSADHLAYVIYTSGSTGQSKGVMVEHRSVFNFWHVLTRTTHQHCPTPATVALNAGFFFDMSIKGIAQLFSGHRLVIIPQLIRASGSELLDFLEQHQVHAFDSTPSQLDTLLAAGLLERQSYQPVSVLLGGEAINAATWEKLRNCQSIRFYNMYGPTECTVDATIDLIRDLGERPSIGRPFANVQVHVLDARGEPAPLGVAGEIHIGGVGVARGYLNRPELSAERFIADPFSAASNARLYKTGDLGRWLADGTLEYLGRNDFQV…	TTCGAAGCCCAGGTGCACGCCAACCCCGACGCCGTGGCCCTGGTCTGCGAAGAGCGCCAGCTGAGCTATCGCCAGCTCAATCGTCGCGCCAACCACCTGGCCCGGCAACTGCTCGCCCTGGGCGTGCAACCCGATCAGCGCGTGGCCATCTGCGCCGAGCGCAGCCTGGAGATGATCGTTGGCCTGCTGGGCGTGCTCAAGGCCGGTGCGGCCTATGTGCCCATCGACCCGGCCCACCCGGCCGAGCGCATAGCCTTCATGCTGCAGGACAGCCAACCCCAGGCACTGTTGACCCAATCGGCGCTGTCCCTGCCGTCCGGGGAACTGCCGGTGGTGCTGCTGGACATCGTGGAATCGTTGCAAGCGGCAGACGATGCGGCTTTTGACAGCAACCCACAG…	CCCCCCCCCCCCC(C(CC(=O)NC1COC(=O)C(NC(=O)C(NC(=O)/C(=C\C)/NC(=O)C(CC(=O)C(NC(=O)C(NC(=O)C(NC(=O)C(NC1=O)(CCCN)O)CC(=O)O)CCO)CC2=C3C=CNC3=CC=C2)C(C)O)C(C(=O)O)O)C(CCl)O)O)O	['Sequence-based prediction']	['pubmed:21551032', 'pubmed:22586093', 'pubmed:22121884']
BGC0000443	NRP	Pseudomonas sp. SHC52	thanamycin	nrpspksdomains_AED90002.1_AMP-binding.4	homoserine	ser	FAAQAGRTPDAVALIGAGQTLSYAELNAQANRVAHGLIALGVRPDDTVGLCARRSPEMVIGLLGILKTGAAYVPLDPQYPAQRLNHMLADSAPRALVRQQGLDELPVPQGLATLELGSPTLLLQPAHDPQVNELNFGHLAYVIYTSGSTGLPKGVMVKHRGLRNLLDWYLDDLAFQAGDAVLLASSYNFDLTQKNILAPLMVGASLHLAEEPFNPNAIVAQIAEAGITHLNMSPSAFHALVDADRHAALACLKRVVLGGEPIQVAMLEKLPLPRPAIINSYGPTECSDVVAWYTADSDLERYRHRSIPIGRPIRNMQLHVLDSHGQLLPLGVPGEIHIGGVGVARGYLNLPQLSAERFIDDPFSERAEARLYKTGDIGRWLPDGTLQYLGRNDDQVKIR	TTCGCCGCACAGGCGGGTCGCACGCCGGATGCAGTGGCGTTGATCGGTGCCGGGCAAACCCTGAGCTACGCCGAACTCAATGCCCAGGCCAACCGCGTGGCCCACGGCTTGATCGCCCTGGGCGTAAGGCCTGACGACACCGTTGGCCTCTGTGCGCGTCGCAGCCCGGAGATGGTCATCGGCCTGCTGGGCATCCTCAAGACCGGGGCGGCCTATGTACCGCTGGACCCGCAATACCCGGCGCAACGCCTGAACCACATGCTCGCCGACAGCGCGCCGCGGGCCCTGGTGCGCCAGCAAGGCCTGGACGAGTTACCGGTGCCGCAAGGCCTGGCCACCCTCGAACTGGGCAGCCCGACGCTGCTGCTGCAGCCGGCCCATGACCCGCAAGTGAACGAG…	CCCCCCCCCCCCC(C(CC(=O)NC1COC(=O)C(NC(=O)C(NC(=O)/C(=C\C)/NC(=O)C(CC(=O)C(NC(=O)C(NC(=O)C(NC(=O)C(NC1=O)(CCCN)O)CC(=O)O)CCO)CC2=C3C=CNC3=CC=C2)C(C)O)C(C(=O)O)O)C(CCl)O)O)O	['Structure-based inference']	['pubmed:21551032', 'pubmed:22586093', 'pubmed:22121884']
BGC0000443	NRP	Pseudomonas sp. SHC52	thanamycin	nrpspksdomains_AED90002.1_AMP-binding.5	histidine	his	FEEQVLRTPDACALVDARQAFTYAELNAQANRLAHHLIATGVQPGDLVAICVERSAAMISGLLGILKAGGAYVPLDPSYPAERLASIVEDARPRLLLADPVGRAAVGTLQEGTRYLAIEQAMAAQTSTRDPRWDATGLTPAHLAYVIYTSGSTGKPKGVMIEHRNLVASTLARRTVYGPSIDKRFLLLSSIAFDSSVAGIFGTLVSGGTLCIPAAEAARDPQAIARFIGEQAITSLLCVPSLGRLVLASLASENGHGSLREMIVAGEACPAQLVQECAGLEPAIVLYNEYGPTEATVWATVHRCTAQDQGTVPIGRAIPNSRLYVLDEQGRPAPLGVPGELYVGGAGVARGYLDRAQLNAEHFLADPFSPDDEARMYRTGDLVRMRADGVLDFLGRNDQ…	TTCGAAGAGCAGGTGCTCCGCACACCGGACGCCTGTGCCCTGGTCGATGCTCGGCAAGCCTTCACTTACGCCGAGCTCAATGCCCAAGCCAATCGCCTGGCCCATCACTTGATCGCCACCGGCGTCCAGCCGGGGGATCTGGTGGCGATCTGCGTTGAGCGCAGCGCGGCGATGATCAGCGGCCTGCTGGGCATTCTCAAGGCCGGCGGCGCCTACGTGCCGCTGGACCCGAGCTACCCGGCCGAACGCCTGGCGTCGATTGTCGAGGATGCGCGGCCACGCCTGCTGCTGGCCGATCCGGTCGGCCGCGCAGCCGTCGGCACGTTGCAGGAAGGCACCCGCTACCTGGCCATCGAACAGGCAATGGCGGCGCAGACGAGTACCCGCGATCCGCGCTGG…	CCCCCCCCCCCCC(C(CC(=O)NC1COC(=O)C(NC(=O)C(NC(=O)/C(=C\C)/NC(=O)C(CC(=O)C(NC(=O)C(NC(=O)C(NC(=O)C(NC1=O)(CCCN)O)CC(=O)O)CCO)CC2=C3C=CNC3=CC=C2)C(C)O)C(C(=O)O)O)C(CCl)O)O)O	['Structure-based inference']	['pubmed:21551032', 'pubmed:22586093', 'pubmed:22121884']
BGC0000443	NRP	Pseudomonas sp. SHC52	thanamycin	nrpspksdomains_AED90003.1_AMP-binding.1	threonine	thr	FEEQARQTPERIAVNLGEEQLSYRQLNEQANRLAHRLRAAGVRPQELVAITLERSVQMIVATLAVLKAGGAYVPIDPASPQERIAYVLRDSGARKAIARQDMAPSLQALGIEVLDPTLGNVDASVANPTHVNTPEHLCYVIYTSGSTGEPKGALLEHRNVVRLLHNNRPDFQFNAEDVWSLFHSNAFDFSVWEIFGALLHGARLTLVPEALRRDPAALLGFLEREQVTVLNQTPSAFHQLSAAALATPDVRLAHLRYVIFGGESLELGKLDAFHRAFGHVALVNMYGITETCVHVTYKAIGAADIAAGISNVGRPIPTTVAYVLDAQQRLLPVGVAGEICVGGLGVGRGYLNRPALSAERFIADPYRPGERLYRSGDLGKLLNNGEIVHLGRMDAQVKIR	TTCGAGGAGCAGGCCCGCCAGACCCCGGAACGCATTGCCGTCAACCTCGGCGAAGAACAGCTGAGCTATCGCCAGCTCAACGAACAGGCCAACCGCCTCGCCCACCGTTTGCGCGCCGCAGGCGTGCGGCCCCAGGAACTGGTGGCCATCACGCTGGAGCGCTCGGTGCAAATGATCGTCGCCACCCTGGCGGTGCTCAAGGCCGGCGGCGCCTATGTGCCCATCGACCCGGCCTCGCCCCAGGAGCGCATTGCCTATGTGCTGCGCGACAGTGGCGCCCGCAAGGCCATCGCGCGCCAGGACATGGCGCCGTCACTGCAGGCGCTGGGTATCGAAGTCCTCGATCCGACCCTCGGCAACGTCGATGCCAGCGTCGCCAACCCGACCCACGTCAACACC…	CCCCCCCCCCCCC(C(CC(=O)NC1COC(=O)C(NC(=O)C(NC(=O)/C(=C\C)/NC(=O)C(CC(=O)C(NC(=O)C(NC(=O)C(NC(=O)C(NC1=O)(CCCN)O)CC(=O)O)CCO)CC2=C3C=CNC3=CC=C2)C(C)O)C(C(=O)O)O)C(CCl)O)O)O	['Structure-based inference']	['pubmed:21551032', 'pubmed:22586093', 'pubmed:22121884']
BGC0000443	NRP	Pseudomonas sp. SHC52	thanamycin	nrpspksdomains_AED90003.1_AMP-binding.2	[]	dhb	FEQRAAAQPQAIALVFGDTALSYQALNRRANRIAQTLLAQGVRPDDRVAILAQRGVEMVCAVLAVLKAGAAYVPLDPAYPAERLGYLLDDSNPVVLLAQPTCLAALPEHAVPVVRLDDDLTADELAELDRNPDRLGLTSRHLAYVIYTSGSTGLPKGVLVEHGNVARLFDATAELFDFGRNDVWTLFHSFAFDFSVWEIWGALSYGGKLVVVPSEVARSPDDFYALVCQQQVTVLNQTPSAFRQFIEARERSDLEHGLREVIFGGEALDFRSLRPWTARTALSRTRLVNMYGITEITVHATYYPVSQDEIDAGAPSLIGPPLPDLCLRILDDYGQPVPVGVNGEIYIGGAGVARHYLNRDKLSAERFIPDPFATHADARLYRTGDIARYRADGGVIYVG…	TTCGAACAACGCGCCGCCGCCCAGCCCCAGGCCATTGCCCTGGTCTTTGGCGACACGGCGTTGAGTTACCAGGCCCTCAATCGCCGGGCCAACCGCATCGCCCAGACGCTGCTGGCCCAGGGCGTGCGCCCTGACGACCGGGTGGCGATCCTGGCCCAGCGCGGCGTGGAAATGGTCTGCGCGGTACTGGCGGTGCTCAAGGCCGGTGCGGCCTATGTGCCGCTGGACCCGGCCTATCCCGCCGAGCGACTCGGCTACCTGCTGGACGACAGCAACCCCGTGGTGCTGCTGGCGCAACCGACGTGCCTCGCCGCCCTGCCCGAGCACGCCGTGCCGGTGGTGCGTCTCGACGATGACCTCACGGCAGATGAGCTGGCGGAACTGGACCGCAATCCGGAC…	CCCCCCCCCCCCC(C(CC(=O)NC1COC(=O)C(NC(=O)C(NC(=O)/C(=C\C)/NC(=O)C(CC(=O)C(NC(=O)C(NC(=O)C(NC(=O)C(NC1=O)(CCCN)O)CC(=O)O)CCO)CC2=C3C=CNC3=CC=C2)C(C)O)C(C(=O)O)O)C(CCl)O)O)O	['Structure-based inference']	['pubmed:21551032', 'pubmed:22586093', 'pubmed:22121884']
BGC0000443	NRP	Pseudomonas sp. SHC52	thanamycin	nrpspksdomains_AED90003.1_AMP-binding.3	aspartic acid	asp	FEAQVQANPDAVALVCEERQLSYRQLNRRANHLARQLLELGVQPDQRVAICTERSLEMIVGLLGVLKAGAAYVPIDPAHPAERMAFMLQDSQPQALLTQSALSLPSGELPVVLLDIVESLQAADDAAFDSNPQIPGLTADHLAYVIYTSGSTGQSKGVMVEHRSVFNFWHVLTRTTHQHCPTPATVALNAGFFFDMSIKGIAQLFSGHRLVIIPQLIRASGSELLDFLEQHQVHAFDSTPSQLDTLLAAGLLERQSYQPVSVLLGGEAINAATWEKLRNCQSIRFYNMYGPTECTVDATIDLIRDLGERPSIGRPFANVQVHVLDARGEPAPLGVAGEIHIGGVGVARGYLNRPELSAERFIADPFSSEPNARLYKTGDLGRWLADGTLEYLGRNDFQV…	TTCGAAGCCCAGGTGCAGGCCAACCCCGACGCCGTGGCTTTGGTCTGCGAAGAGCGCCAACTGAGCTATCGCCAGCTCAACCGCCGCGCCAACCACTTGGCCCGGCAGCTGCTTGAACTGGGCGTGCAGCCCGATCAGCGCGTGGCCATCTGCACCGAGCGCAGCCTGGAGATGATCGTCGGCCTGCTGGGCGTGCTCAAGGCCGGCGCGGCCTACGTGCCCATCGACCCGGCCCACCCGGCCGAGCGCATGGCCTTCATGCTGCAGGACAGCCAACCCCAAGCACTGTTGACCCAATCAGCACTGTCCCTGCCGTCCGGGGAACTGCCGGTGGTGCTGCTGGACATCGTGGAATCGTTGCAAGCGGCGGACGATGCGGCGTTCGACAGCAACCCACAG…	CCCCCCCCCCCCC(C(CC(=O)NC1COC(=O)C(NC(=O)C(NC(=O)/C(=C\C)/NC(=O)C(CC(=O)C(NC(=O)C(NC(=O)C(NC(=O)C(NC1=O)(CCCN)O)CC(=O)O)CCO)CC2=C3C=CNC3=CC=C2)C(C)O)C(C(=O)O)O)C(CCl)O)O)O	['Structure-based inference']	['pubmed:21551032', 'pubmed:22586093', 'pubmed:22121884']
BGC0000443	NRP	Pseudomonas sp. SHC52	thanamycin	nrpspksdomains_AED90004.1_AMP-binding.1	threonine	thr	FTARAREFPERTAVSDASRTLSYAQLDAASSQLAARLRQEGVKDGMLVGMSLTRSVDLVVSLLGILKAGGAYVPVDPQYPGKRVEHIVRDSGLSLMIGEPAELAQSPSVRVLPLANLLAGPALEPIGEVDRRNPDQAPAYVIYTSGSTGEPKGVLVAHANVSRLLESTQREYAFNEHDVWSMFHSIGFDFSVWEIWGALAHGGHVAVVPYDVSRSPTATRQWLVDRGVTVLSQTPSAFRGLEEADRQAKAPLALRYVVFGGEALPATVLRPWVERHGDRKPALINMYGITEATVHTTFKRVLGQDLESAAMVSIGAPLDGWRLNLLDADRQPVPQGTAGELYIEGAGVALGYLNRPTLNSERFVQLPGTSSRAYRTGDLVVLGDDGEYRYAGRCDEQLK…	TTTACCGCCCGGGCCCGTGAATTCCCCGAGCGAACGGCCGTCTCCGACGCCTCGCGCACGTTGAGTTACGCGCAACTCGATGCGGCCTCGTCGCAACTGGCTGCCCGTCTTCGCCAGGAAGGCGTCAAGGACGGCATGCTGGTCGGGATGAGCCTGACACGCAGCGTCGACCTGGTCGTCAGCCTGCTGGGCATCCTCAAGGCCGGCGGTGCCTACGTCCCGGTCGACCCGCAATACCCCGGCAAGCGCGTCGAACACATCGTGCGCGACAGCGGCCTGAGCCTGATGATCGGCGAGCCCGCCGAGCTGGCGCAGAGCCCGTCCGTGCGCGTCCTGCCCCTGGCCAATCTGCTGGCCGGCCCGGCACTGGAACCGATTGGCGAGGTCGACCGCCGCAAC…	CCCCCCCCCCCCC(C(CC(=O)NC1COC(=O)C(NC(=O)C(NC(=O)/C(=C\C)/NC(=O)C(CC(=O)C(NC(=O)C(NC(=O)C(NC(=O)C(NC1=O)(CCCN)O)CC(=O)O)CCO)CC2=C3C=CNC3=CC=C2)C(C)O)C(C(=O)O)O)C(CCl)O)O)O	['Sequence-based prediction']	['pubmed:21551032', 'pubmed:22586093', 'pubmed:22121884']
BGC0000447	NRP	Pseudomonas costantinii	tolaasin I	nrpspksdomains_taaA_AMP-binding.1	threonine	thr	FETQAASRPNATALIFDGQRLSYDDLNRRANQVAHRLLSLGVRPDDRVAICVERGLDMMVGLLGILKAGAGYVPIDPAYPQERISYTLQDSAPVAVLVQQATHALVAELSVPVIELDADDCQAESPQNPHVPGLTSANLAYVIYTSGSTGLPKGVMIEHHNVARLFTATEGWFNFNDQDVWALFHSFAFDFSVWEIWGALMHGGQLLVVPQLTSRSPDECYALLCSAGVTILNQTPSAFRSLIAAQGQSALKHSLRQVIFGGEALEPGILKPWYARTTNAGTQLVNMYGITETTVHVTYRALTAADACRVGTSPIGGRIPDLRLYILDAQGQPVPHGVEGELYVGGAGVARGYLNRPELNAERFLDDPFDTTPGARMYRTGDLGRWLADGSIDYLGRND…	TTTGAGACCCAGGCGGCATCCCGTCCCAATGCGACGGCGCTGATTTTCGACGGCCAACGCCTGAGCTACGACGACTTGAACCGCCGCGCCAACCAGGTCGCGCACCGCCTGTTGAGCCTGGGTGTGCGCCCGGATGATCGGGTGGCGATCTGCGTCGAGCGCGGCCTGGACATGATGGTCGGTCTGTTGGGCATCCTCAAAGCGGGTGCCGGTTATGTGCCGATCGACCCGGCGTACCCGCAGGAGCGCATCAGCTACACCTTGCAGGACAGTGCGCCGGTGGCGGTGCTGGTGCAGCAGGCGACTCATGCCTTGGTCGCCGAGCTGTCGGTGCCGGTTATCGAGTTGGATGCCGACGATTGCCAGGCCGAATCACCCCAAAATCCGCATGTGCCGGGC…	CCCCCC(CC(=O)N/C(=C\C)/C(=O)N1CCC[C@@H]1C(=O)N[C@@H](CO)C(=O)N[C@@H](CC(C)C)C(=O)N[C@H](C(C)C)C(=O)N[C@H](CO)C(=O)N[C@H](CC(C)C)C(=O)N[C@H](C(C)C)C(=O)N[C@@H](C(C)C)C(=O)N[C@H](CCC(=O)N)C(=O)N[C@@H](CC(C)C)C(=O)N[C@H](C(C)C)C(=O)N/C(=C\C)/C(=O)N[C@@H]2[C@H](OC(=O)[C@@H](NC(=O)[C@H](NC(=O)[C@@H](NC(=O)[C@@H](NC2=O)[C@@H](C)CC)CCO)CCN)CCCCN)C)O	['Sequence-based prediction']	['pubmed:24222604', 'pubmed:22031037', 'pubmed:17244491', 'pubmed:15165142']
BGC0000447	NRP	Pseudomonas costantinii	tolaasin I	nrpspksdomains_taaA_AMP-binding.2	proline	pro	FEAQAQRQPDAIAVTYDGQSLSYGDLNVLANRIAHRLIADGIGANDRVAICAERSLEMVAGLLAILKAGAGYVPLDPAYPDERLAYMLQDSAPKALLTQQRLAQRFSLSSVPTLLLDAADGIDAQPAHNPQVPGLDADALAYVIYTSGSTGQPKGVAMPHGPLVNLMQWQIAQTLTDGRPAQRTLQFAALGFDVAFQEVFSTLCAGGELSLIPGDLRLNFRELFRHICEQGVQRLFLPCIALQALAEAVAETPELGRLPCALSDVITAGEQLRISEPMRELFLRLPGCRLHNHYGPTESHVTTALTLDGDATLWPVLPSIGVPVANTRIYLLNEHLQPVPLGVAGEIYIGGACVARGYLHRDDLTAERFLADPFVSQGRLYKTGDLGRYQRDGEIDYLG…	TTCGAAGCACAGGCGCAGCGCCAGCCTGACGCAATCGCCGTGACCTACGACGGTCAGTCCCTGAGCTACGGTGACTTGAACGTGCTGGCCAACCGGATTGCCCACCGCCTGATCGCCGACGGCATCGGGGCCAACGACCGCGTGGCGATTTGCGCCGAACGCAGCCTGGAAATGGTCGCGGGCCTGTTGGCGATTCTCAAGGCCGGCGCGGGTTACGTACCGTTGGACCCGGCCTACCCGGATGAGCGCCTGGCCTACATGCTGCAAGACAGTGCGCCCAAGGCCTTGCTGACCCAGCAGCGCCTGGCGCAGCGTTTCAGCCTGTCCAGCGTGCCGACCTTGCTGCTGGATGCCGCCGACGGTATCGATGCGCAGCCCGCGCACAACCCGCAAGTTCCG…	CCCCCC(CC(=O)N/C(=C\C)/C(=O)N1CCC[C@@H]1C(=O)N[C@@H](CO)C(=O)N[C@@H](CC(C)C)C(=O)N[C@H](C(C)C)C(=O)N[C@H](CO)C(=O)N[C@H](CC(C)C)C(=O)N[C@H](C(C)C)C(=O)N[C@@H](C(C)C)C(=O)N[C@H](CCC(=O)N)C(=O)N[C@@H](CC(C)C)C(=O)N[C@H](C(C)C)C(=O)N/C(=C\C)/C(=O)N[C@@H]2[C@H](OC(=O)[C@@H](NC(=O)[C@H](NC(=O)[C@@H](NC(=O)[C@@H](NC2=O)[C@@H](C)CC)CCO)CCN)CCCCN)C)O	['Sequence-based prediction']	['pubmed:24222604', 'pubmed:22031037', 'pubmed:17244491', 'pubmed:15165142']
BGC0000447	NRP	Pseudomonas costantinii	tolaasin I	nrpspksdomains_taaA_AMP-binding.3	serine	ser	FEAQVQRTPDAIALLADGQRLSYRELNQRANRLAHHLREQGVVLESRVGICVERSAEMVIGLLAILKAGGGYVPLDPAYPLDRLAYMLEDSAPSVVLVQSATRALLGDVAVPVVDLELVTWQHQSASNPLIAELTPQHQAYVIYTSGSTGKPKGVINEHSPVVNRLLCMQDTYRLDSSDALLQKTPFSFDVSVWEFFWPLFTGARLVMARPGGHKDPAYLCEVIQAEHITTVHFVPSMLDVFLAHGDVSQAAGLARVMCSGEALPGSLVRRFKAQLPGSALFNHYGPTEAAVEVTAWDCNGAVTPDNTPIGKPIGNVRMYVLDAHLQPVPLGVSGELFIGGVQVARGYLNRPELNAERFLKDPYSTGRIYRTGDVARYLPDGNIEYLGRNDDQVKIR	TTCGAAGCCCAGGTGCAGCGCACGCCGGACGCCATTGCGCTGCTGGCGGACGGTCAGCGCCTGAGCTACCGCGAGCTGAACCAACGCGCCAATCGCCTCGCCCATCATCTGCGCGAACAGGGTGTAGTGCTGGAGTCCCGGGTTGGCATCTGCGTTGAACGGAGCGCCGAGATGGTCATCGGTTTGCTGGCGATCCTCAAGGCCGGCGGCGGTTACGTACCACTGGACCCGGCTTACCCGCTGGACCGCCTGGCCTACATGCTTGAAGACAGCGCGCCGTCCGTGGTCCTGGTGCAAAGCGCCACTCGCGCCTTGCTGGGTGACGTCGCTGTGCCGGTGGTCGACCTGGAGCTCGTCACCTGGCAACACCAGTCGGCAAGCAACCCGCTGATTGCCGAA…	CCCCCC(CC(=O)N/C(=C\C)/C(=O)N1CCC[C@@H]1C(=O)N[C@@H](CO)C(=O)N[C@@H](CC(C)C)C(=O)N[C@H](C(C)C)C(=O)N[C@H](CO)C(=O)N[C@H](CC(C)C)C(=O)N[C@H](C(C)C)C(=O)N[C@@H](C(C)C)C(=O)N[C@H](CCC(=O)N)C(=O)N[C@@H](CC(C)C)C(=O)N[C@H](C(C)C)C(=O)N/C(=C\C)/C(=O)N[C@@H]2[C@H](OC(=O)[C@@H](NC(=O)[C@H](NC(=O)[C@@H](NC(=O)[C@@H](NC2=O)[C@@H](C)CC)CCO)CCN)CCCCN)C)O	['Sequence-based prediction']	['pubmed:24222604', 'pubmed:22031037', 'pubmed:17244491', 'pubmed:15165142']
BGC0000447	NRP	Pseudomonas costantinii	tolaasin I	nrpspksdomains_taaB_AMP-binding.1	leucine	leu	FEARALALPQAVAVRQGEQQLSYQQLNEQANQLARHLIEWGVGPDDRIAICARRSVETLVGLLAILKAGAAYVPVDPAHPQERIAYLLQDSAPVAVLVQTATAALVTGLSVPVIDLNSNAWHAAPADNPKVAGLTPAHLAYVIYTSGSTGQPKGVMVEHQTLENLVNWHCDAFELHAGSHTSSVAGFGFDAMAWEVWPALCAGATLHLPPAQQAHEDIDALLQWWVVQPLDVSFLPTPVAEYAFSQHLEHPTLKTLLIGGDRLRQFNTPRRFNLVNNYGPTEATVVATSGLIEAGKTLHIGKPVANAQVYVLDAQQQLLPQGVAGELYVAGAGVARGYLNREQMTAERFLKDPFSCDPQARMYRTGDLVRWREDGTLEYLGRNDDQVKIR	TTCGAGGCCCGCGCGCTGGCGCTGCCCCAGGCGGTGGCCGTGCGCCAGGGCGAGCAGCAATTGAGCTATCAACAGCTCAACGAGCAGGCCAACCAACTGGCTCGCCACTTGATCGAATGGGGGGTTGGCCCCGACGATCGCATCGCTATCTGCGCTCGACGCAGCGTCGAAACTCTGGTGGGGCTGCTGGCGATCCTCAAGGCTGGCGCGGCTTACGTGCCGGTGGACCCGGCGCACCCCCAGGAGCGTATTGCCTACCTGTTGCAAGACAGTGCCCCCGTGGCGGTGCTGGTCCAGACGGCGACCGCCGCCCTGGTCACCGGGCTGTCTGTCCCGGTCATTGATCTGAATTCCAATGCCTGGCACGCCGCGCCGGCCGACAATCCGAAGGTGGCCGGC…	CCCCCC(CC(=O)N/C(=C\C)/C(=O)N1CCC[C@@H]1C(=O)N[C@@H](CO)C(=O)N[C@@H](CC(C)C)C(=O)N[C@H](C(C)C)C(=O)N[C@H](CO)C(=O)N[C@H](CC(C)C)C(=O)N[C@H](C(C)C)C(=O)N[C@@H](C(C)C)C(=O)N[C@H](CCC(=O)N)C(=O)N[C@@H](CC(C)C)C(=O)N[C@H](C(C)C)C(=O)N/C(=C\C)/C(=O)N[C@@H]2[C@H](OC(=O)[C@@H](NC(=O)[C@H](NC(=O)[C@@H](NC(=O)[C@@H](NC2=O)[C@@H](C)CC)CCO)CCN)CCCCN)C)O	['Sequence-based prediction']	['pubmed:24222604', 'pubmed:22031037', 'pubmed:17244491', 'pubmed:15165142']
BGC0000447	NRP	Pseudomonas costantinii	tolaasin I	nrpspksdomains_taaB_AMP-binding.2	valine	val	FEAHAAANPQALAAVHGEQSLSYAQLNRRANQLAHHLISQGVAPGDRVAILLERSLDLLVSQLAISKCAAVYVPLDVHAPLDRQGFMISDSGAQLLLSVTSIEVPEGARRLDLDTLDLSVEPEHNPALEQLAETAAYIMYTSGSTGTPKGVLVPHRAITRLVINNGYADFNQHDRVAFASNPAFDASTLDVWAPLLNGGAVVVVDQDTLLSQTDFAALLQEQAVSVLWMTAGLFHQYAEGLLAVFPQLRYLIVGGDVLDPSVIARVLKDGAPQHLLNGYGPTEATTFSTTHEITRADEGSIPIGRPVGNSRAYVLDARQQPVPVGVTGELYIGGQGVALGYLNRAELTAQAFLADPFNDGALMYRTGDLVAWREDGTLQYQGRNDQQVKIR	TTCGAAGCCCATGCGGCGGCAAATCCGCAGGCGTTGGCAGCGGTGCATGGCGAGCAGTCCTTGAGCTATGCGCAATTGAACCGGCGTGCCAACCAGTTGGCCCATCACTTGATCAGTCAGGGCGTGGCCCCCGGCGACCGCGTGGCGATCCTGCTGGAGCGTTCCCTGGACCTGCTGGTCAGCCAACTGGCAATCAGCAAGTGCGCGGCGGTGTATGTGCCGCTGGACGTCCATGCACCGCTGGACCGTCAAGGCTTCATGATTTCGGACAGCGGCGCGCAGCTGTTGCTGAGCGTGACCTCGATTGAGGTGCCGGAAGGCGCGCGTCGTCTGGACCTGGACACCCTGGACCTGAGTGTTGAGCCTGAGCATAACCCGGCGCTTGAGCAATTGGCCGAG…	CCCCCC(CC(=O)N/C(=C\C)/C(=O)N1CCC[C@@H]1C(=O)N[C@@H](CO)C(=O)N[C@@H](CC(C)C)C(=O)N[C@H](C(C)C)C(=O)N[C@H](CO)C(=O)N[C@H](CC(C)C)C(=O)N[C@H](C(C)C)C(=O)N[C@@H](C(C)C)C(=O)N[C@H](CCC(=O)N)C(=O)N[C@@H](CC(C)C)C(=O)N[C@H](C(C)C)C(=O)N/C(=C\C)/C(=O)N[C@@H]2[C@H](OC(=O)[C@@H](NC(=O)[C@H](NC(=O)[C@@H](NC(=O)[C@@H](NC2=O)[C@@H](C)CC)CCO)CCN)CCCCN)C)O	['Sequence-based prediction']	['pubmed:24222604', 'pubmed:22031037', 'pubmed:17244491', 'pubmed:15165142']
BGC0000447	NRP	Pseudomonas costantinii	tolaasin I	nrpspksdomains_taaB_AMP-binding.3	serine	ser	FEAQVQRTPDAVALLADAQHLSYRELNERANRLAHHLREQGVQPDSRVAICVERSVEMVVGLLAILKAGGGYVPLDPAYPLDRLAYMLEDSAPAVVLVQSATRGLLGEISVPVVDLEQVTWQQALASNPLIAELTPQHQAYVIYTSGSTGKPKGVINEHSAVVNRLLWMQEAYDLDASDTVLQKTPFSFDVSVWEFFWPLFTGARLVMARPGGHKDPEYLCEIIQAERVTTLHFVPSMLDVFLAHGDVSQAAGLVRVMCSGEALPGSVVRRFKQQLPASGLFNLYGPTEAAVDVTAWDCAGPITPDNTPIGKPIANTRMYVLDEHLQPVPLGVSGELFIGGVQVARGYLNRPQLTAERFFDDPFNPGRMYRTGDVGRFLSDGNIEYLGRNDDQVKIR	TTCGAAGCCCAGGTACAACGCACGCCGGACGCCGTCGCGCTGCTGGCCGACGCCCAGCACCTGAGCTACCGCGAGCTGAACGAGCGCGCCAACCGCCTGGCCCATCACCTGCGCGAGCAGGGTGTGCAGCCGGATTCGCGAGTGGCGATCTGCGTCGAACGCAGCGTTGAGATGGTCGTCGGCCTGCTGGCGATCCTCAAGGCAGGCGGTGGTTATGTGCCGCTGGACCCGGCGTACCCGCTGGACCGCCTGGCCTACATGCTCGAAGACAGCGCACCGGCCGTGGTGCTGGTGCAAAGTGCCACCCGCGGTTTGCTCGGTGAAATCAGCGTACCGGTGGTGGATCTGGAGCAGGTGACTTGGCAACAGGCGTTGGCGAGTAACCCGCTGATTGCCGAA…	CCCCCC(CC(=O)N/C(=C\C)/C(=O)N1CCC[C@@H]1C(=O)N[C@@H](CO)C(=O)N[C@@H](CC(C)C)C(=O)N[C@H](C(C)C)C(=O)N[C@H](CO)C(=O)N[C@H](CC(C)C)C(=O)N[C@H](C(C)C)C(=O)N[C@@H](C(C)C)C(=O)N[C@H](CCC(=O)N)C(=O)N[C@@H](CC(C)C)C(=O)N[C@H](C(C)C)C(=O)N/C(=C\C)/C(=O)N[C@@H]2[C@H](OC(=O)[C@@H](NC(=O)[C@H](NC(=O)[C@@H](NC(=O)[C@@H](NC2=O)[C@@H](C)CC)CCO)CCN)CCCCN)C)O	['Sequence-based prediction']	['pubmed:24222604', 'pubmed:22031037', 'pubmed:17244491', 'pubmed:15165142']
BGC0000447	NRP	Pseudomonas costantinii	tolaasin I	nrpspksdomains_taaC_AMP-binding.1	leucine	leu	EQQVRRNPQAVAVVYDGQALSYAELNQQANHLAFQLIELGVQPDDRVAICARRSLETLVGLVAILKAGAAYVPIDPAHPLDRIGYLLEDSAPVAVLVQPGLAQRLPTLQVPVLELDSRLLHGAARDNPQIAGLTPAHLAYVIYTSGSTGLPKGVMVEHQTLENLVHWHCQAFDLNAGSHTSSVAGFGFDAMAWEVWPALCAGATLHLPPAANGNEDIDALLAWWLAQPLDVSFLPTPVAEYAFSQNLQHPTLKTLLIGGDRLRQFSQAQRFTLVNNYGPTEATVVATSGVITAGQTLHIGKPVANAQAYLLDAQLKPVPLGVTGELYVGGAGVARGYLNLAQMTAERFLKDPFSADPQARMYRTGDLARWLADGNLEYLGRNDDQVKIR	GAACAGCAAGTGCGGCGCAACCCGCAGGCGGTCGCGGTGGTGTATGACGGGCAGGCGCTGTCCTATGCCGAGTTGAACCAGCAGGCCAACCACCTGGCCTTCCAACTGATCGAACTTGGCGTGCAGCCTGACGACCGCGTGGCCATCTGCGCGCGACGCAGCCTGGAAACCCTGGTCGGGCTGGTGGCGATCCTCAAGGCCGGTGCGGCGTATGTACCGATCGATCCGGCGCACCCGCTGGACCGCATCGGCTACTTGCTCGAAGACAGCGCCCCGGTTGCCGTGCTGGTGCAACCGGGCCTGGCCCAGCGTTTGCCGACCCTGCAGGTGCCGGTGCTCGAACTCGACAGCCGCCTGCTGCATGGCGCTGCACGTGACAATCCACAGATCGCTGGTCTG…	CCCCCC(CC(=O)N/C(=C\C)/C(=O)N1CCC[C@@H]1C(=O)N[C@@H](CO)C(=O)N[C@@H](CC(C)C)C(=O)N[C@H](C(C)C)C(=O)N[C@H](CO)C(=O)N[C@H](CC(C)C)C(=O)N[C@H](C(C)C)C(=O)N[C@@H](C(C)C)C(=O)N[C@H](CCC(=O)N)C(=O)N[C@@H](CC(C)C)C(=O)N[C@H](C(C)C)C(=O)N/C(=C\C)/C(=O)N[C@@H]2[C@H](OC(=O)[C@@H](NC(=O)[C@H](NC(=O)[C@@H](NC(=O)[C@@H](NC2=O)[C@@H](C)CC)CCO)CCN)CCCCN)C)O	['Sequence-based prediction']	['pubmed:24222604', 'pubmed:22031037', 'pubmed:17244491', 'pubmed:15165142']
BGC0000447	NRP	Pseudomonas costantinii	tolaasin I	nrpspksdomains_taaC_AMP-binding.2	valine	val	FEALAAAQPTALAAVHAEQRATYAELNTRANRLAHHLIGLGVVPGASVAILLERSLDLLVSQLAISKCAAVYVPLDVNAPLDRQGFMISDSGAQLLLSVASIEVPEGARRLDLDTLDLSVEPDHNPALEQSAETAAYIMYTSGSTGTPKGVLVPHRAITRLVINNGYADFNQHDRVAFASNPAFDASTLDVWAPLLNGGAVVVVDQDTLLSQADFAALLQEQAVSVLWMTAGLFHQYAEGLLPVFTQLRYLIVGGDVLDPSVIARVLKDGAPQHLLNGYGPTEATTFSTTHEITRADEGSIPIGRPVGNSRAYVLDARQQPVPVGVTGELYIGGQGVALGYLNRAELTAEKFLADPFNDGALMYRTGDLVAWREDGTLQYQGRNDQQVKIR	TTTGAAGCGCTTGCCGCCGCACAACCGACTGCATTGGCTGCCGTGCACGCAGAGCAACGGGCGACCTATGCCGAGCTGAATACGCGGGCCAACCGCCTGGCCCATCATCTGATCGGACTAGGCGTGGTTCCGGGTGCTAGCGTGGCGATCCTGCTGGAGCGCTCCCTGGACCTGCTGGTCAGCCAACTGGCAATCAGCAAGTGCGCGGCGGTGTATGTGCCGTTGGATGTCAACGCACCGCTGGACCGTCAAGGCTTCATGATTTCGGACAGCGGCGCGCAGCTGTTGCTGAGCGTGGCCTCGATTGAGGTGCCGGAAGGCGCGCGTCGTCTGGACCTGGACACCCTGGACCTGAGTGTTGAGCCTGACCACAATCCGGCGCTTGAGCAATCGGCCGAG…	CCCCCC(CC(=O)N/C(=C\C)/C(=O)N1CCC[C@@H]1C(=O)N[C@@H](CO)C(=O)N[C@@H](CC(C)C)C(=O)N[C@H](C(C)C)C(=O)N[C@H](CO)C(=O)N[C@H](CC(C)C)C(=O)N[C@H](C(C)C)C(=O)N[C@@H](C(C)C)C(=O)N[C@H](CCC(=O)N)C(=O)N[C@@H](CC(C)C)C(=O)N[C@H](C(C)C)C(=O)N/C(=C\C)/C(=O)N[C@@H]2[C@H](OC(=O)[C@@H](NC(=O)[C@H](NC(=O)[C@@H](NC(=O)[C@@H](NC2=O)[C@@H](C)CC)CCO)CCN)CCCCN)C)O	['Sequence-based prediction']	['pubmed:24222604', 'pubmed:22031037', 'pubmed:17244491', 'pubmed:15165142']
BGC0000447	NRP	Pseudomonas costantinii	tolaasin I	nrpspksdomains_taaC_AMP-binding.3	valine	val	FEAHAAANPQALAMVHGEQSLSYAQLNRRANQLAHHLISQGVAPGDRVAILLERSLDLLVSQLAISKCAAVYVPLDVNAPLDRQGFMISDSGAQLLLSVTSIEVPEGARRLDLDTLDLSVEPEHNPALEQLAETAAYIMYTSGSTGTPKGVLVPHRAITRLVINNGYADFNQHDRVAFASNPAFDASTLDVWAPLLNGGAVVVVDQDTLLSQTDFAALLQEQAVSVLWMTAGLFHQYAEGLLAVFPQLRYLIVGGDVLDPSVIARVLKDGAPQHLLNGYGPTEATTFSTTHEITRADEGSIPIGRPVGNSRAYVLDARQQPVPVGVTGELYIGGQGVALGYLNRAELTAQAFLADPFNDGALMYRTGDLVAWREDGTLQYQGRNDQQVXIR	TTCGAAGCCCATGCCGCGGCAAATCCGCAGGCGTTGGCAATGGTGCATGGCGAGCAGTCCTTGAGCTATGCGCAATTGAACCGGCGTGCCAACCAGTTGGCCCATCACTTGATCAGTCAGGGCGTGGCCCCCGGCGACCGCGTGGCGATCCTGCTGGAGCGTTCCCTGGACCTGCTGGTCAGCCAACTGGCAATCAGCAAGTGCGCGGCGGTGTATGTGCCGTTGGACGTCAATGCACCGCTGGACCGTCAAGGCTTCATGATTTCGGACAGCGGCGCGCAGCTGTTGCTGAGCGTGACCTCGATTGAGGTGCCGGAAGGCGCGCGTCGTCTGGACCTGGACACCCTGGACCTGAGTGTTGAGCCTGAGCATAANCCGGCGCTTGAGCAATTGGCCGAG…	CCCCCC(CC(=O)N/C(=C\C)/C(=O)N1CCC[C@@H]1C(=O)N[C@@H](CO)C(=O)N[C@@H](CC(C)C)C(=O)N[C@H](C(C)C)C(=O)N[C@H](CO)C(=O)N[C@H](CC(C)C)C(=O)N[C@H](C(C)C)C(=O)N[C@@H](C(C)C)C(=O)N[C@H](CCC(=O)N)C(=O)N[C@@H](CC(C)C)C(=O)N[C@H](C(C)C)C(=O)N/C(=C\C)/C(=O)N[C@@H]2[C@H](OC(=O)[C@@H](NC(=O)[C@H](NC(=O)[C@@H](NC(=O)[C@@H](NC2=O)[C@@H](C)CC)CCO)CCN)CCCCN)C)O	['Sequence-based prediction']	['pubmed:24222604', 'pubmed:22031037', 'pubmed:17244491', 'pubmed:15165142']
BGC0000447	NRP	Pseudomonas costantinii	tolaasin I	nrpspksdomains_taaD_AMP-binding.1	glutamine	gln	EAHALHTPHAVAVVLGDQVLSYRHLNEQANQVAHHLRSLGVQADSCVAICMERSLAMIVGLLGILKSGAGYVPLDPEYPSQRLALALQDSQPLAVLVHAQTRAVMGDTHITLVDLADAQLSTQPRHNPAAVAGPNDLAYVIFTSGSTGRPKGVMVEHGSLVNHITWQTRAFGFDANERILQRTSVAFDASVWEIWTPLAIGARLVLLPAHASRDVEQMAQTLVEQQVSVAQFVPSLLRLLVQLPASGVQCRYLFSGGEALDPQLAMQARALTTHGIVNLYGPTEATIDSTSWTCDGNAPVESVPIGKPIANARAYVLDARLEPVALGVAGELYIGGAGVARGYLGRDDLTAERFLADPFTGSGRLYKTGDLVRYLADGTLEYLGRNDDQVKLR	GAGGCGCACGCCCTGCACACGCCGCATGCCGTGGCGGTGGTGTTGGGTGACCAGGTGTTGAGCTATCGCCACCTGAACGAGCAGGCCAACCAGGTCGCGCATCACCTGCGCAGCCTTGGGGTGCAGGCCGATTCATGCGTGGCGATCTGCATGGAGCGTAGCCTGGCGATGATTGTCGGGTTGCTGGGGATCCTCAAGTCGGGAGCCGGTTACGTGCCGCTCGACCCCGAGTACCCGTCGCAACGCCTGGCACTGGCCCTGCAAGACAGCCAGCCGCTGGCGGTGTTGGTCCACGCACAAACCCGCGCGGTGATGGGTGACACCCACATCACACTGGTGGACCTGGCCGATGCGCAGTTGAGCACGCAGCCACGTCACAACCCGGCCGCCGTGGCTGGG…	CCCCCC(CC(=O)N/C(=C\C)/C(=O)N1CCC[C@@H]1C(=O)N[C@@H](CO)C(=O)N[C@@H](CC(C)C)C(=O)N[C@H](C(C)C)C(=O)N[C@H](CO)C(=O)N[C@H](CC(C)C)C(=O)N[C@H](C(C)C)C(=O)N[C@@H](C(C)C)C(=O)N[C@H](CCC(=O)N)C(=O)N[C@@H](CC(C)C)C(=O)N[C@H](C(C)C)C(=O)N/C(=C\C)/C(=O)N[C@@H]2[C@H](OC(=O)[C@@H](NC(=O)[C@H](NC(=O)[C@@H](NC(=O)[C@@H](NC2=O)[C@@H](C)CC)CCO)CCN)CCCCN)C)O	['Sequence-based prediction']	['pubmed:24222604', 'pubmed:22031037', 'pubmed:17244491', 'pubmed:15165142']
BGC0000447	NRP	Pseudomonas costantinii	tolaasin I	nrpspksdomains_taaD_AMP-binding.2	leucine	leu	FEQQVELYPHTLAAVYQGQSLTYTELNRQANQLAHQLIELGVQPDDRVAICARRSLEMLVGLVAILKAGACYVPIDAAHPVERLSYLLGDSAPVAVLIQPALAQRLPTVTVPVLELDSRLWQGPSKGNPQIDGLTRAHLAYVIYTSGSTGLPKGVMVEHHTLENLVNWHCDTFELGHGSKTSSVAGFGFDAMAWEVWPALCVGATLYMPPAHDGSEDIDALLQWWLAQPLDVSFLPTPVAEYAFSQQLEHPTLKTLLIGGDRLRQFNKPQRFNLVNNYGPTEATVVATSGRIEAGQVLHIGKPVSNAQVYLLDERQQPVPLGVAGELYVAGAGVARGYLNRPQMTAERFLKDPFSRDPQARMYRTGDLARWLEDGTLDYLGRNDDQVKIR	TTCGAGCAGCAGGTCGAGCTGTACCCGCATACGCTGGCGGCGGTGTACCAAGGCCAAAGCCTGACCTACACCGAGCTGAACCGCCAGGCCAACCAACTGGCGCACCAGTTGATCGAACTCGGCGTGCAACCCGACGACCGCGTGGCGATCTGTGCCCGGCGCAGCCTGGAAATGCTGGTGGGCCTGGTGGCGATTCTCAAGGCCGGCGCGTGTTATGTGCCGATCGATGCGGCGCATCCGGTCGAGCGCCTGAGTTACCTGCTCGGCGATAGCGCACCGGTGGCCGTGCTGATCCAGCCGGCGCTGGCGCAGCGTTTGCCAACGGTGACCGTGCCGGTATTGGAACTGGACAGTCGCCTGTGGCAAGGCCCGTCCAAAGGCAACCCACAGATTGACGGC…	CCCCCC(CC(=O)N/C(=C\C)/C(=O)N1CCC[C@@H]1C(=O)N[C@@H](CO)C(=O)N[C@@H](CC(C)C)C(=O)N[C@H](C(C)C)C(=O)N[C@H](CO)C(=O)N[C@H](CC(C)C)C(=O)N[C@H](C(C)C)C(=O)N[C@@H](C(C)C)C(=O)N[C@H](CCC(=O)N)C(=O)N[C@@H](CC(C)C)C(=O)N[C@H](C(C)C)C(=O)N/C(=C\C)/C(=O)N[C@@H]2[C@H](OC(=O)[C@@H](NC(=O)[C@H](NC(=O)[C@@H](NC(=O)[C@@H](NC2=O)[C@@H](C)CC)CCO)CCN)CCCCN)C)O	['Sequence-based prediction']	['pubmed:24222604', 'pubmed:22031037', 'pubmed:17244491', 'pubmed:15165142']
BGC0000447	NRP	Pseudomonas costantinii	tolaasin I	nrpspksdomains_taaD_AMP-binding.3	valine	val	FEAWVQAHPHALAAVHGQQQISYDGLNARANRLAHHLIGLGVVPGASVAILLERSLDLLVSQLAISKCAAVYVPLDVNAPLDRQGFMISDSGAQLLLSVASIEVPEGARRLDLDTLDLSVEPDHNPALEQSAETAAYIMYTSGSTGTPKGVLVPHRAITRLVINNGYADFNQHDRVAFASNPAFDASTLDVWAPLLNGGAVVVVDQDTLLSQTDFVALLQQQAVSVLWMTAGLFHQYAEGLLAVFPQLRYLIVGGDVLDPSVIARVLKDGAPQHLLNGYGPTEATTFSTTHEITRADEGSIPIGRPVGNSRTYVLDARQQPVAVGVTGELYIGGQGVALGYLNRAELTAEKFLADPFNDGALMYRTGDLVAWREDGTLQYQGRNDQQVKIR	TTCGAGGCGTGGGTACAGGCGCATCCGCATGCCTTGGCGGCGGTGCATGGCCAACAACAGATCAGCTATGACGGATTGAACGCTCGGGCCAACCGGCTGGCCCATCACCTGATCGGACTAGGCGTGGTTCCGGGTGCCAGCGTGGCAATCCTGTTGGAGCGTTCCCTGGACCTGCTGGTCAGCCAACTGGCAATCAGCAAGTGCGCGGCGGTGTATGTGCCGTTGGACGTCAATGCACCGCTGGACCGTCAAGGCTTCATGATTTCGGACAGCGGCGCGCAGCTGTTGCTGAGCGTGGCTTCGATTGAGGTGCCGGAAGGCGCGCGTCGTCTGGACCTGGACACCCTGGACCTGAGTGTTGAGCCTGACCACAATCCGGCGCTTGAGCAATCGGCCGAG…	CCCCCC(CC(=O)N/C(=C\C)/C(=O)N1CCC[C@@H]1C(=O)N[C@@H](CO)C(=O)N[C@@H](CC(C)C)C(=O)N[C@H](C(C)C)C(=O)N[C@H](CO)C(=O)N[C@H](CC(C)C)C(=O)N[C@H](C(C)C)C(=O)N[C@@H](C(C)C)C(=O)N[C@H](CCC(=O)N)C(=O)N[C@@H](CC(C)C)C(=O)N[C@H](C(C)C)C(=O)N/C(=C\C)/C(=O)N[C@@H]2[C@H](OC(=O)[C@@H](NC(=O)[C@H](NC(=O)[C@@H](NC(=O)[C@@H](NC2=O)[C@@H](C)CC)CCO)CCN)CCCCN)C)O	['Sequence-based prediction']	['pubmed:24222604', 'pubmed:22031037', 'pubmed:17244491', 'pubmed:15165142']
BGC0000447	NRP	Pseudomonas costantinii	tolaasin I	nrpspksdomains_taaE_AMP-binding.1	threonine	thr	EAWAAENPDASAVLFEGRHLSYGDLNRRANQVAHRLLSLGVRPDDRVAICVERGLDMMVGLLGILKAGAGYVPIDPAYPQERISYTLQDSAPVAVLVQQATHALVAELSVPVIELDADDCQAESTQNPHVSGLTSANLAYVIYTSGSTGLPKGVMIEHHNVARLFSATEGWFNFNDQDVWALFHSFAFDFSVWEIWGALIHGGQLLVVPQLTSRSPDECYALLCSAGVTVLNQTPSAFRSLIAAQGQSALKHSLRQVIFGGEALEPGILKPWYARTTNAGTQLVNMYGITETTVHVTYRALEAADAQLVGVSPIGGRIPDLQLYVLDEQREPVPVGVVGELYVGGAGVARGYLNRPELNAERFIADPFSGRTEARLYRSGDLGRRLADGSIDYLGRNDD…	GAAGCCTGGGCGGCGGAAAATCCCGACGCCAGTGCGGTGCTATTTGAAGGCCGGCACCTGAGCTATGGCGACTTGAATCGACGCGCCAACCAGGTCGCACACCGCTTGCTGAGCCTGGGCGTACGCCCGGATGATCGAGTGGCGATCTGCGTCGAGCGCGGCCTGGACATGATGGTCGGTCTGTTGGGCATCCTCAAAGCGGGTGCCGGTTATGTGCCGATCGACCCGGCGTACCCGCAGGAACGCATCAGCTACACCTTGCAGGACAGTGCGCCGGTCGCGGTGCTGGTGCAGCAGGCGACTCATGCCTTGGTCGCCGAGCTGTCGGTGCCGGTTATCGAGTTGGATGCCGACGATTGCCAGGCTGAATCTACCCAAAACCCACACGTATCGGGCCTC…	CCCCCC(CC(=O)N/C(=C\C)/C(=O)N1CCC[C@@H]1C(=O)N[C@@H](CO)C(=O)N[C@@H](CC(C)C)C(=O)N[C@H](C(C)C)C(=O)N[C@H](CO)C(=O)N[C@H](CC(C)C)C(=O)N[C@H](C(C)C)C(=O)N[C@@H](C(C)C)C(=O)N[C@H](CCC(=O)N)C(=O)N[C@@H](CC(C)C)C(=O)N[C@H](C(C)C)C(=O)N/C(=C\C)/C(=O)N[C@@H]2[C@H](OC(=O)[C@@H](NC(=O)[C@H](NC(=O)[C@@H](NC(=O)[C@@H](NC2=O)[C@@H](C)CC)CCO)CCN)CCCCN)C)O	['Sequence-based prediction']	['pubmed:24222604', 'pubmed:22031037', 'pubmed:17244491', 'pubmed:15165142']
BGC0000447	NRP	Pseudomonas costantinii	tolaasin I	nrpspksdomains_taaE_AMP-binding.2	threonine	thr	KAAVQPDATAVLFDDQRLSYDDLNRRANQVAHRLLSLGVRPDDRVAICVERGLDMIVGLLGILKAGAGYVPIDPAYPQERISYTLQDSAPVAVLVQQATHALVAELSVPVIELDADDCQAESTQNPHVSGLTSANLAYVIYTSGSTGLPKGVMIEHHNVARLFSATEGWFNFNDQDVWALFHSFAFDFSVWEIWGALIHGGQLLVVPQLTSRSPDECYALLCSAGVTILNQTPSAFRSLIAAQGQSALKHSLRQVIFGGEALEPGILKPWYARTTNAGTQLVNMYGITETTVHVTYRALEAADAQLVGVSPIGGRIPDLQLYVLDDQREPVPVGVVGELYVGGAGVARGYLNRPELNAERFIADPFSGRADARLYKTGDLGRWLADGSIDYLGRNDDQV…	AAGGCCGCTGTGCAACCCGACGCTACGGCGGTGCTGTTTGACGATCAGCGTCTGAGCTACGACGACTTGAACCGCCGCGCCAACCAGGTCGCGCACCGCCTGTTGAGCCTGGGTGTGCGCCCGGATGATCGGGTGGCGATTTGTGTCGAACGAGGCCTGGACATGATCGTTGGCCTGCTCGGTATCCTCAAGGCCGGTGCCGGTTATGTGCCGATCGACCCGGCCTACCCACAGGAACGCATCAGCTACACCTTGCAGGACAGCGCGCCGGTCGCGGTGTTGGTGCAGCAGGCGACTCATGCCTTGGTCGCCGAGCTGTCGGTGCCGGTTATCGAGTTGGATGCCGACGATTGCCAGGCTGAATCTACCCAAAACCCACACGTATCGGGCCTCACCTCG…	CCCCCC(CC(=O)N/C(=C\C)/C(=O)N1CCC[C@@H]1C(=O)N[C@@H](CO)C(=O)N[C@@H](CC(C)C)C(=O)N[C@H](C(C)C)C(=O)N[C@H](CO)C(=O)N[C@H](CC(C)C)C(=O)N[C@H](C(C)C)C(=O)N[C@@H](C(C)C)C(=O)N[C@H](CCC(=O)N)C(=O)N[C@@H](CC(C)C)C(=O)N[C@H](C(C)C)C(=O)N/C(=C\C)/C(=O)N[C@@H]2[C@H](OC(=O)[C@@H](NC(=O)[C@H](NC(=O)[C@@H](NC(=O)[C@@H](NC2=O)[C@@H](C)CC)CCO)CCN)CCCCN)C)O	['Sequence-based prediction']	['pubmed:24222604', 'pubmed:22031037', 'pubmed:17244491', 'pubmed:15165142']
BGC0000447	NRP	Pseudomonas costantinii	tolaasin I	nrpspksdomains_taaE_AMP-binding.3	leucine	leu	FEAQVERQPDATAARQGDQHITYRQLNQRANQLAHRLLEEGVRPDDRIAICARRSLETLVGLMAILKAGAAYVPIDPAHPQERITYLLQDCAPVLVLAQSNTRSLLSHTELPVIELDSDQWHRRPTLNPSVVGLTPANLAYVIYTSGSTGLPKGVMVEHRTLENLVHWHCQTFNLHVGGHSSSVAGFGFDAMAWEVWPALCVGATLHLPPAKEGSEDIDALLHWWLAQPLDVSFLPTPVAEYAFSQQLQHPTLKTLLIGGDRLRQFSTLQRFNVVNNYGPTEATVVATSGLLEAGKVLHIGKPIANTQVYLLDEHLKPVPQGVVGELYIGGAGVARGYLNRPEMTAERFLKDPFSRDPQARMYRTGDLARWLEDGTLDYQGRNDDQVKIR	TTCGAGGCGCAGGTCGAGCGTCAGCCGGATGCCACGGCGGCGCGCCAGGGCGATCAGCACATTACCTATCGCCAGCTTAACCAGCGCGCCAATCAGTTGGCCCACCGCCTGCTCGAAGAGGGCGTACGTCCGGATGACCGGATCGCCATCTGCGCGCGCCGCAGCCTGGAAACCCTGGTCGGCCTGATGGCCATCCTCAAGGCCGGTGCGGCGTATGTGCCGATCGATCCGGCGCACCCGCAGGAGCGCATCACCTACCTATTGCAGGACTGCGCCCCGGTGCTGGTGCTGGCGCAATCGAACACGCGCTCGCTGCTGAGCCACACCGAACTGCCGGTGATCGAACTGGACAGCGATCAATGGCATCGCCGCCCGACGCTCAACCCGAGCGTGGTAGGC…	CCCCCC(CC(=O)N/C(=C\C)/C(=O)N1CCC[C@@H]1C(=O)N[C@@H](CO)C(=O)N[C@@H](CC(C)C)C(=O)N[C@H](C(C)C)C(=O)N[C@H](CO)C(=O)N[C@H](CC(C)C)C(=O)N[C@H](C(C)C)C(=O)N[C@@H](C(C)C)C(=O)N[C@H](CCC(=O)N)C(=O)N[C@@H](CC(C)C)C(=O)N[C@H](C(C)C)C(=O)N/C(=C\C)/C(=O)N[C@@H]2[C@H](OC(=O)[C@@H](NC(=O)[C@H](NC(=O)[C@@H](NC(=O)[C@@H](NC2=O)[C@@H](C)CC)CCO)CCN)CCCCN)C)O	['Sequence-based prediction']	['pubmed:24222604', 'pubmed:22031037', 'pubmed:17244491', 'pubmed:15165142']
BGC0000447	NRP	Pseudomonas costantinii	tolaasin I	nrpspksdomains_taaE_AMP-binding.4	homoserine	ser	FEAQAVRTPDAVAVQTGGAALTYRQLNERANQLAHHLRELGVRPDARVAICVERSAELIIGLLAILKAGGAYVPIDPNYPLERIHYMLQDSAPAALLVHGVTAQLAAAAGLPVVDLDREDWRGQALDNPQVVELNATHLTYVIYTSGSTGQPKGVMVEHQGVVNMLGWYLEDVGLDAHDAVLLLTSHSFDLTQKNIFASLAVGATLHLADSPFDPSSIVRQIGEQAITHINLAPSAFYALIEADQPQALSCLRRVVLGGEPIKLSQLEKLQAPRPQFINSYGPTECSDVVAWHTVNADLDSYGAGDIPLGRPLRNLTLYVLDAYGQQVPTGSVGELYIGGAGVARGYLNREELTAERFLDDPFTAQGRMYRTGDLARYRADGTLDYLGRNDDQVKIR	TTTGAAGCGCAGGCCGTGCGCACGCCCGATGCGGTGGCGGTGCAGACCGGCGGTGCGGCGCTGACCTACCGTCAGCTTAACGAGCGTGCCAACCAGTTGGCCCACCATCTGCGTGAACTTGGCGTGCGGCCGGATGCGCGCGTGGCGATTTGCGTGGAGCGTAGCGCTGAGCTGATTATCGGTCTGCTGGCGATTCTCAAGGCGGGCGGCGCTTATGTGCCGATCGACCCGAACTACCCGCTGGAGCGCATTCACTACATGCTGCAAGACAGCGCCCCGGCGGCGTTACTGGTGCACGGCGTGACCGCACAATTGGCTGCTGCCGCGGGTCTGCCAGTCGTCGACCTCGACCGTGAGGACTGGCGCGGGCAAGCACTGGACAACCCGCAGGTGGTCGAG…	CCCCCC(CC(=O)N/C(=C\C)/C(=O)N1CCC[C@@H]1C(=O)N[C@@H](CO)C(=O)N[C@@H](CC(C)C)C(=O)N[C@H](C(C)C)C(=O)N[C@H](CO)C(=O)N[C@H](CC(C)C)C(=O)N[C@H](C(C)C)C(=O)N[C@@H](C(C)C)C(=O)N[C@H](CCC(=O)N)C(=O)N[C@@H](CC(C)C)C(=O)N[C@H](C(C)C)C(=O)N/C(=C\C)/C(=O)N[C@@H]2[C@H](OC(=O)[C@@H](NC(=O)[C@H](NC(=O)[C@@H](NC(=O)[C@@H](NC2=O)[C@@H](C)CC)CCO)CCN)CCCCN)C)O	['Structure-based inference']	['pubmed:24222604', 'pubmed:22031037', 'pubmed:17244491', 'pubmed:15165142']
BGC0000447	NRP	Pseudomonas costantinii	tolaasin I	nrpspksdomains_taaE_AMP-binding.5	2,4-diaminobutyric acid	dab	FEAQVEARPHAIAVAFEQQRISYAELNRQANRLAHHLIGLGIGPDDRVAICAERGDEVLVGLLGVLKAGAAYVPLDPNYPPERLAYMIADSTPSAVLTQRALQDRLPALAIPQVLLDEPRSGAEHNPQVPGLTARHLAYVIYTSGSTGNPKGVMIEHRGLVNYSLDAARLFGLTTLDTVLQQNTLNFDLSVEEIFPAWLAGATLAPSRHVFGTEAARDPAITPTFLHLTAAHWHTLAAEWHHTPQQAQEHLRHVRLINVTGDALSAQKLKLWDEVRPAHTRLINTYGPTEATVSCTTAYVTHTGDTTGNTTIGKPMANTRIYLLDSQQQPVPFGVAGEIFIGGDGVARGYLNLDLISAERFLADPFNDAPGARMYKTGDLARYLADGSIEYLGRNDFQV…	TTCGAAGCCCAGGTCGAGGCGCGTCCGCACGCCATCGCCGTGGCGTTCGAACAGCAGCGCATCAGTTATGCCGAACTGAACCGTCAGGCCAATCGCCTGGCGCACCACCTGATCGGCCTGGGCATCGGCCCGGATGACCGCGTGGCGATTTGCGCCGAGCGTGGCGATGAGGTGCTGGTGGGCCTGCTCGGGGTACTCAAGGCAGGCGCCGCCTATGTGCCGCTGGACCCCAATTACCCGCCGGAGCGCCTGGCCTACATGATCGCCGACAGCACGCCGTCGGCAGTACTGACCCAACGCGCATTGCAGGACCGGCTGCCGGCCCTGGCGATCCCGCAGGTGTTGCTGGATGAGCCGCGCAGCGGTGCCGAGCACAATCCGCAGGTGCCGGGCCTGACT…	CCCCCC(CC(=O)N/C(=C\C)/C(=O)N1CCC[C@@H]1C(=O)N[C@@H](CO)C(=O)N[C@@H](CC(C)C)C(=O)N[C@H](C(C)C)C(=O)N[C@H](CO)C(=O)N[C@H](CC(C)C)C(=O)N[C@H](C(C)C)C(=O)N[C@@H](C(C)C)C(=O)N[C@H](CCC(=O)N)C(=O)N[C@@H](CC(C)C)C(=O)N[C@H](C(C)C)C(=O)N/C(=C\C)/C(=O)N[C@@H]2[C@H](OC(=O)[C@@H](NC(=O)[C@H](NC(=O)[C@@H](NC(=O)[C@@H](NC2=O)[C@@H](C)CC)CCO)CCN)CCCCN)C)O	['Sequence-based prediction']	['pubmed:24222604', 'pubmed:22031037', 'pubmed:17244491', 'pubmed:15165142']
BGC0000447	NRP	Pseudomonas costantinii	tolaasin I	nrpspksdomains_taaE_AMP-binding.6	lysine	lys	FERQVLRNADAVALEFDGQSLSYGELNAQANQLAHHLIALGVQPDDRVAIALERGVQMIVAVLASLKAGAAYVPLDPAYPPQRLAFMLADSAPRVLLSEYAVLPLLGALPQALQVVTLNSALQPWRELGEHNPLAAELGLGSEHLAYVLYTSGSTGTPKGVMIEHAGLCNEIRAIRGLTGLTAGDRTLQFATINFDASIEEIFGALTCGATLVVRSAAWLTDAAQFWALAAQARLSVISLPTRFWQGLADDHASAIPASVRVIVVGGEELSPEAVQRWFLRSGHTPRLLNTYGPTEATIIATANEVFAANPHPRAIGRPIANTRVYVLDAHGHPTGLGVAGEIHIAGAGIARGYLNQPQLSSERFLADPFSDVPGRLYKTGDLGRWLPDGTLEYLGRND…	TTCGAGCGGCAGGTGCTGCGCAACGCAGACGCGGTAGCGCTGGAGTTCGACGGTCAGTCGTTGAGTTACGGCGAGTTGAATGCCCAGGCCAATCAGTTGGCCCACCATTTGATCGCCCTCGGCGTGCAGCCCGATGACCGTGTGGCCATCGCCCTGGAGCGCGGCGTCCAGATGATCGTGGCAGTGCTCGCGAGCCTGAAGGCTGGCGCCGCTTATGTGCCGCTCGACCCGGCCTACCCACCGCAGCGCCTGGCGTTCATGCTGGCAGACAGCGCGCCGCGGGTATTGCTCAGCGAGTACGCGGTACTGCCGTTGCTCGGTGCATTGCCGCAGGCTTTGCAGGTGGTGACCTTGAACAGTGCGCTGCAGCCTTGGCGTGAGCTGGGCGAGCACAATCCG…	CCCCCC(CC(=O)N/C(=C\C)/C(=O)N1CCC[C@@H]1C(=O)N[C@@H](CO)C(=O)N[C@@H](CC(C)C)C(=O)N[C@H](C(C)C)C(=O)N[C@H](CO)C(=O)N[C@H](CC(C)C)C(=O)N[C@H](C(C)C)C(=O)N[C@@H](C(C)C)C(=O)N[C@H](CCC(=O)N)C(=O)N[C@@H](CC(C)C)C(=O)N[C@H](C(C)C)C(=O)N/C(=C\C)/C(=O)N[C@@H]2[C@H](OC(=O)[C@@H](NC(=O)[C@H](NC(=O)[C@@H](NC(=O)[C@@H](NC2=O)[C@@H](C)CC)CCO)CCN)CCCCN)C)O	['Sequence-based prediction']	['pubmed:24222604', 'pubmed:22031037', 'pubmed:17244491', 'pubmed:15165142']
BGC0000995	NRP_Polyketide	Pseudomonas sp. 2663	FR901464	nrpspksdomains_fr9D_AMP-binding.1	threonine	thr	SRRDPARRALSFDGRHMTYGDLDRGSDALARHLVSLGVRPGDLVLLCVTPSPDLITAILAILKAGAAYVPIDPGSPAQRIEMIREDSGARFVVTTSISEAAVESVAHRVVLDRDGAAIAAAVEREPTLVLPDVRRGDLAYVIYTSGTTGKPKGVMIEHGNVLRLFDRTNHWFDFGPDDVWTLFHSAAFDFSVWEIWGALLYGGRLVILDTTQRKDPVRLLETLADEQVTVFNQTPAAFYAVVRAATAGPPRRPLALRLVVFGGERLDFGRLAPWIERYGDSRPALINMYGITETTVHVTHAPVTAADVTGACASVIGHPIPDLDVQLLDEHRAPVPDGEIGEMYVGGAGVARGYLNRPELTQERFVTISGVRCYKTGDLARRNARGELEYIGRNDAQVK…	AGTCGCCGGGATCCCGCGCGACGCGCGCTGAGCTTCGATGGCCGCCACATGACCTACGGCGACCTCGACCGCGGCAGCGACGCGCTGGCCCGGCATCTCGTGTCGCTCGGCGTGCGGCCGGGCGACCTGGTGTTGCTGTGCGTCACGCCATCGCCTGATCTGATCACCGCGATCCTCGCGATCCTCAAGGCCGGCGCCGCCTACGTACCCATCGATCCGGGCTCGCCGGCGCAGCGTATTGAAATGATCCGCGAGGACAGCGGCGCACGCTTCGTCGTCACGACCTCGATCTCGGAGGCGGCGGTCGAAAGCGTCGCGCACCGTGTCGTGCTCGATCGGGACGGCGCGGCGATCGCTGCGGCGGTCGAGCGCGAGCCGACCCTCGTGCTGCCCGATGTC…	CC(OC(C)=O)\C=C/C(=O)NC1CC(C)C(C\C=C(/C)\C=C\C2OC(C)(O)CC3(CO3)C2O)OC1C	[]	['pubmed:21291275']
BGC0001045	NRP_Polyketide	Pseudomonas sp. Q71576	spiruchostatin A	nrpspksdomains_spiDE1_AMP-binding.1	alanine	ala	FREQAAAHPEQTALEQGTECWTYAQLERWSDRAAAVLRSAGAGRGSIIGVTGERSPRLIAAFLACLKAGGAYLPLERNYPDARLSEMVADAEPALILVADDLEPGWLSSYPGPVLKLSACEAELPFPSTLESGAGDLAYVMYTSGSTGKPKGVCIEHRGIVRLATGAGFMQLDTSTVMLQASSLGFDTSTFEIWGCLLNGGRLVLVEQGPLILEAMADTIVSKGVTCAWLTADLFRLMVEEQVASLRGLRELLAGGDALPVASCKAFLEACPDVALINGYGPTENTTFTSTHRVTQEDVHRVSIPIGRPLGNTQVWVVNENGCPVPPGVPGELWTSGDGLARGYLGREDLTVERFVQGPLLGGGRWYRTGDRVRWRHDGVLEFLGRIDTQVKLR	TTCCGGGAGCAGGCGGCTGCCCATCCAGAGCAAACAGCTTTGGAGCAGGGAACCGAGTGTTGGACCTATGCACAACTTGAGCGCTGGTCTGACCGTGCGGCGGCAGTGTTACGCAGCGCCGGTGCGGGTCGTGGTTCGATAATCGGTGTGACCGGTGAGCGTTCGCCGCGACTGATTGCAGCCTTTCTGGCTTGCTTGAAGGCCGGTGGCGCGTACTTGCCGCTAGAGCGGAACTACCCGGACGCGCGGCTGAGCGAAATGGTGGCCGATGCCGAGCCTGCGCTGATATTGGTGGCCGATGACCTGGAGCCTGGCTGGCTGAGTAGCTACCCGGGGCCAGTGTTGAAACTGTCGGCCTGCGAGGCCGAACTCCCATTCCCTTCGACGCTGGAATCGGGT…	[H][C@]12CSSCC\C=C\C(CC(=O)N[C@H](C)C(=O)N1)OC(=O)CC(O)C(NC2=O)C(C)C	[]	['pubmed:24973954']
BGC0001045	NRP_Polyketide	Pseudomonas sp. Q71576	spiruchostatin A	nrpspksdomains_spiDE1_AMP-binding.2	cysteine	cys	RYAALTPKAAAVIGVSDRMSYDELAAQQERIATSVVAANARSEPVAVFLPRSLHAVAAYAGVMLAGCAYVPVDPATPPRRLQEIFSTIGFVVTTRALAPQFDAIAVQTILVDEVVSAQLPDVAINNLAYVMFTSGSTGKPKGVMIDHRAASLTIESIIERYAIGTRDRLLCVSSAGFDLSVFDFFGAFAVGAAVVLAPESTTVDPGTWLDLMEREQVTVWESVPAVMELLLAECRQSGRKLSSSLRLVMLSGDRVALGLPERIREAATSELDIIALGGATEAAIWSCYYDTKELAPGAHVIPYGRHLPGQRLYVLSPALRPLPIGVPGDLWIAGAGVARGYLGQPELTSERFMADPYVPGQSMYKTGDRALVLADGNHEFLGRVDDQIKIG	CGGTATGCGGCGCTGACGCCCAAGGCTGCGGCAGTTATCGGCGTAAGTGACCGGATGAGCTATGACGAGCTCGCGGCGCAGCAGGAACGTATCGCCACATCGGTGGTAGCAGCCAATGCACGATCCGAGCCGGTCGCGGTGTTTCTGCCACGCTCGTTGCACGCTGTTGCAGCCTATGCGGGCGTGATGCTGGCAGGTTGCGCATACGTTCCGGTCGACCCTGCGACGCCGCCGCGCCGCTTGCAGGAAATCTTCAGCACCATTGGCTTTGTGGTCACTACGCGAGCACTCGCTCCTCAGTTCGACGCCATCGCGGTGCAAACGATCCTGGTCGACGAGGTTGTATCAGCGCAACTGCCCGACGTCGCAATCAATAACTTGGCCTATGTCATGTTTACC…	[H][C@]12CSSCC\C=C\C(CC(=O)N[C@H](C)C(=O)N1)OC(=O)CC(O)C(NC2=O)C(C)C	[]	['pubmed:24973954']
BGC0001047	NRP_Polyketide	Pseudomonas syringae	syringolin A	nrpspksdomains_sylC_AMP-binding.1	valine	val	EAFAATQPEAIAVRCGDAVLTYAQLNESADKVADTLLRKGVQPGDVVGICMMRSELLVAALLGVLKAGACYLSIDCALPAERRNWLLEEADVKWALIDESAPALRDATSTLLIGQLVNEQDDPRVSPLAKPVISADARCYYMFTSGSTGTPKATASTHRAVVSLVKGTDYIDIKGDDRFLFFAPLAFDASTFEIWGALLNGAQLVVQPGEAGGLDDLAHTLENQQVSVLWLTSALFQEMVDQYPQAMAGVRHVLTGGDVVSPQSMRSLLARSTGTLTICYGPTEGTVFTTAYSMDKVEQVTDKPLIGWPIAQADAYIVDVFGQLAEPGVPGELFIGGTGITGAYLKRPELNQERFVTLERFPGKTLFRTGDLARWTPGRGIEFLGRSDSQIKIR	GAGGCCTTTGCGGCCACACAGCCCGAGGCCATCGCTGTGCGGTGCGGCGATGCAGTGCTGACGTACGCTCAGCTCAATGAATCCGCCGACAAAGTTGCCGACACATTGCTTCGCAAGGGCGTGCAGCCGGGTGACGTCGTGGGCATCTGCATGATGCGCTCCGAATTGCTGGTTGCGGCGCTGTTGGGCGTGCTCAAGGCCGGTGCATGCTACCTCTCGATCGACTGTGCATTGCCTGCAGAGCGTCGTAATTGGCTTCTGGAGGAGGCGGACGTCAAGTGGGCACTGATCGATGAGAGTGCTCCGGCTTTACGTGATGCAACCTCAACACTGTTGATAGGGCAGTTGGTGAATGAGCAGGACGACCCACGCGTGTCGCCGCTGGCCAAACCTGTCATC…	CC(C)C1/C=C/C(=O)NCC/C=C\C(C(=O)N1)NC(=O)C(C(C)C)NC(=O)NC(C(C)C)C(=O)O	['Structure-based inference']	['pubmed:14714872']
BGC0001047	NRP_Polyketide	Pseudomonas syringae	syringolin A	nrpspksdomains_sylD_AMP-binding.1	dehydrolysine / lysine	lys	FKRSAAQWGEADALVYENRRYSYAQLDAEARVLAGHLHAAGVRRGDRVAVVQRYGPEVIIALLAVHQVGGIYVPLAIDDARHADLLKDIEPRLVLTLSACQEQLRGYPCLVQDDLPQATGTLHENEFEGRNTQPEDIAYIIFTSGSTGRPKGVSVSHGSWVSLLQALEQTYGQTEPGVTGILQMANFTFDVFMSDVVRALAVGARLIMCPRQSLADPEQLYELITAERVTLLEFVPAVLRQMIRYLEETGRRLDTLRTLTCGADVWFVHEYRKMQTLCGPQTRVVSVYGVTEATCESATFEPDAGWYDPERSLPIGGPLPNTSLYLVDATLNLVPRTVPGELLIGGGAVASGYMNRPELNEKSFLTGSFSASGRFLPGVGEQRFYRTGDLCRHMRDGTI…	TTCAAACGCAGTGCCGCGCAGTGGGGCGAGGCGGATGCGCTGGTCTATGAAAACCGTCGTTACAGCTATGCGCAACTGGATGCAGAGGCCCGGGTACTGGCGGGCCACCTGCATGCTGCCGGCGTTCGGCGTGGTGACCGGGTTGCAGTGGTGCAACGCTATGGGCCAGAGGTCATCATCGCGTTACTGGCGGTGCATCAGGTCGGGGGCATTTATGTGCCGCTGGCGATCGACGATGCCCGTCATGCTGATCTGCTCAAGGACATCGAGCCCAGACTGGTGCTCACACTGAGCGCCTGTCAGGAGCAACTGAGGGGTTATCCATGCCTTGTGCAGGATGATTTGCCGCAGGCCACCGGCACACTGCACGAGAACGAATTCGAGGGGCGCAACACACAG…	CC(C)C1/C=C/C(=O)NCC/C=C\C(C(=O)N1)NC(=O)C(C(C)C)NC(=O)NC(C(C)C)C(=O)O	['Structure-based inference', 'Homology']	['pubmed:14714872']
BGC0001047	NRP_Polyketide	Pseudomonas syringae	syringolin A	nrpspksdomains_sylD_AMP-binding.2	valine	val	FEQRVRQTPQAIALQLQQRCWTYAELDRLANGIAHALIKKGVQAGEHIGLFTGRHPYLVAGMLGILKARCAFVPLNPQDSMEGALGYMIKDAALHRVVGHRGLAHELAALGLETLLVDDFEGDQREWSAPACQREPQDLAYILYTSGSTGQPKGVMVSQRNIDNTANAFARTLELTGQSRQLQYFSPVFDGVCGEVFPVLISGATLVFAASEQLLPGPDLVTLLREQRITHLQITPTALRLLPHAELAELKVIISAGEACPANVAQTWAAGRRFLNGYGPTETTVYASARDYWDERGALVLRPLDNVRMYVLDRYLNPLPCGVPGELYIGGSGVAQGYLNLDERTAQAFLPDPYGVSPEARLYRTGDFVVRQFNGSLSYVGRIDNQVKIR	TTTGAACAGCGTGTACGTCAGACTCCCCAGGCTATTGCCCTTCAGTTGCAACAACGCTGCTGGACATACGCCGAACTGGACCGGTTAGCCAACGGCATCGCCCACGCGTTGATAAAGAAGGGTGTGCAAGCCGGTGAGCACATCGGCCTGTTCACTGGACGGCATCCCTATCTGGTGGCAGGCATGCTTGGCATCCTCAAGGCGCGCTGTGCCTTTGTCCCCTTGAATCCGCAGGATTCGATGGAAGGTGCGCTGGGCTACATGATCAAAGACGCAGCATTGCACCGCGTGGTGGGTCATCGAGGCTTGGCACACGAGCTTGCCGCTCTGGGGCTGGAGACGTTGCTGGTCGACGACTTCGAAGGTGACCAGCGCGAATGGTCTGCTCCGGCCTGCCAG…	CC(C)C1/C=C/C(=O)NCC/C=C\C(C(=O)N1)NC(=O)C(C(C)C)NC(=O)NC(C(C)C)C(=O)O	['Structure-based inference']	['pubmed:14714872']
BGC0001099	NRP_Polyketide	Pseudomonas fluorescens	kalimantacin A	nrpspksdomains_bat2_AMP-binding.1	glycine	gly	DDVASRTPKATAVVFGEQSLTYRELSEHSERLAARLADSGVRPGDRVGVCLERSLALPVCLLGILKAGAAYVPLDPAFPRDRLQHMLQDSGARCVVVQERQRSLVEEVAGDATQIVCIDQDEWHKNQPPAPAAAEWHAALASRTTSSTALAYVMYTSGSTGQPKGVMITHQSLTNFLISMSREPGITADDRLLAVTTYSFDIAGLELYLPLIVGATCHLCDAALVKDAEQLKQEIARVRPTMMQATPVTWSMLLQVGWRNETRTKILCGGEALSQALRTCFVESGWDAWNLYGPTETTIWSTVERVSDIDAHSIGRPIANTQIYILDQYQQPAPILVPGELCIGGAGLASGYFNQPTLTQIKFTDNPFKPGSKLYRTGDLAYWRADGTLGYIGRIDGQV…	GACGATGTGGCGAGCCGTACACCGAAAGCGACCGCCGTGGTTTTCGGCGAACAGTCGCTCACCTATCGGGAGTTGAGCGAACACAGTGAGCGGCTTGCCGCACGTCTTGCGGACAGCGGTGTACGACCTGGTGATCGTGTCGGCGTTTGCCTGGAGCGCTCGCTGGCGTTACCAGTCTGTCTGCTTGGCATATTGAAGGCCGGAGCTGCCTACGTTCCGCTTGACCCGGCATTTCCTCGTGATCGCCTGCAGCACATGCTGCAGGACAGCGGTGCACGGTGTGTGGTCGTCCAAGAGCGGCAGCGCAGTTTGGTCGAAGAGGTGGCTGGCGATGCTACGCAGATCGTGTGTATCGACCAGGACGAATGGCATAAGAACCAACCACCCGCCCCGGCAGCG…	CC(C\C=C\C=C/CCC(=C)CC(C)C\C(C)=C\C(O)=O)CC(=O)CC(O)CNC(=O)C(C)C(C)OC(N)=O	['Structure-based inference']	['pubmed:20189105', 'pubmed:21035728']
BGC0001149	NRP_Saccharide	Pseudomonas sp. SHC52	brabantamide A	nrpspksdomains_BN844_0706_AMP-binding.1	serine	ser	ENQVAARPEATAVRFEDRTLTYDELNRRANQVAHALLETGIGPDARVAICLERSLEMVVGLLGILKAGGAYVPLDPGYPADRLRHMLSDSAPSALLTTRVLLSSLPAVTMPVLCLDSDLEQLSRQPQHNPDPVAQGLTPRHLAYVIYTSGSTGLPKGVMNQHDGVVNRLLWARDAYQVDEHSRVLQKTPFSFDVSVWEFFLPLLSGAQLVVAAPGGHQDPRYLLDIMASAGITLLHFVPSMLQVFLDQVTAQPLPALKKVLCSGEALPYALQTRFFERLPGVQLHNLYGPTEAAIDVTAWQCRPDVHPGIVPIGRPIANTQLYILDANLQLLPPGIAGELHIGGIGVARGYLNREQLTAERFIRDPFQADPQARLYKTGDLGRWLPDGSIEYLGRNDFQ…	GAAAACCAGGTCGCCGCACGCCCCGAAGCCACAGCGGTGCGTTTCGAAGACCGGACGCTGACCTACGACGAACTGAATCGACGGGCCAATCAGGTGGCCCACGCCCTGCTCGAAACCGGTATCGGCCCCGACGCACGGGTCGCCATTTGCCTGGAACGCAGCCTGGAAATGGTGGTGGGCCTGCTGGGCATTCTCAAGGCGGGCGGCGCCTACGTGCCCCTGGACCCGGGGTATCCTGCCGACCGCTTGCGCCACATGTTGAGCGACAGTGCCCCCAGCGCCCTGCTGACCACCCGTGTCTTGCTCAGCAGCCTGCCCGCCGTGACGATGCCGGTGCTGTGCCTGGACAGCGACCTCGAGCAGCTGTCCCGCCAACCACAGCACAACCCGGACCCCGTC…	CCCCCCCCCCC[C@H](CC(=O)NC(=O)/C=C/1\[C@@H]2CCCN2C(=O)O1)O[C@H]3[C@@H]([C@@H]([C@H]([C@@H](O3)C)O)O)O	['Activity assay']	['pubmed:24436210']
BGC0001149	NRP_Saccharide	Pseudomonas sp. SHC52	brabantamide A	nrpspksdomains_BN844_0706_AMP-binding.2	proline	pro	AGHDEQIAVSFEQTHLSYRQLSDTCAQLVSWLHRQGIGQGDRVAIMMPRSPELIVALLGVVQAGAAYVPIDLSYPHERIRLILEDSQPSLLLFADASATLAATLAGETVKRHWNDVAAGFDDDLARSHELVAHIAAGIAGEDNAYLLYTSGSTGRPKGVAMPHRALTNLVLWQNRQQNTGIPLKTLQYSPISFDVSFQEIFSTLCGGAELAMIDEGLRYDFIRLLKFIQLQDINRLFLPYVAFQGLAEVAQQLDLRPASLRQISVAGEQLKITAEIRNLLDSLDDCRVENHYGPTEAHVVTRLKLEGAAASWPSMPPIGTAIDGVRMHVLDATGNACPVGVTGDLFIEGICLANGYWNRPDLTDERFIYRQLEGKTRRLYETGDIGFYLPSGDLVYQGR…	GCGGGCCACGACGAGCAGATTGCCGTGAGCTTCGAGCAGACCCACTTGTCCTATCGCCAACTGAGCGACACCTGCGCGCAACTGGTGAGTTGGCTGCACCGACAGGGTATCGGCCAGGGCGATCGGGTGGCGATCATGATGCCCCGCTCGCCCGAACTGATCGTTGCCCTGCTCGGCGTCGTGCAGGCCGGCGCGGCGTATGTGCCGATTGACCTGAGCTATCCCCATGAACGTATCCGGCTGATTCTCGAAGACTCCCAGCCGAGCCTGCTGTTGTTCGCCGATGCGTCGGCCACCCTGGCGGCCACGCTGGCCGGCGAGACGGTCAAACGGCATTGGAACGACGTGGCCGCCGGGTTCGACGACGATCTGGCCCGCAGTCATGAGCTGGTCGCCCAC…	CCCCCCCCCCC[C@H](CC(=O)NC(=O)/C=C/1\[C@@H]2CCCN2C(=O)O1)O[C@H]3[C@@H]([C@@H]([C@H]([C@@H](O3)C)O)O)O	['Sequence-based prediction']	['pubmed:24436210']
BGC0001312	NRP	Pseudomonas fluorescens SBW25	viscosin	nrpspksdomains_PFLU_2552_AMP-binding.1	threonine	thr	ETHAAAQPEAIALRFDNQRLTYRQLNERANQVAHRLLAQGIRPDDRVAICVERGPEMIIGLLGILKAGAGYVPIDPAYPLERIAYTLTDSEPLAVLVQANTRHLVGDLPQVDLNGLRGESIVNPRVNVSPAHLAYVIYTSGSTGQPKGVMIEHRQVARLFTATEHWFDFNRNDVWALFHSFAFDFSVWEIWGALMHGGQLLIVPQLVSRSPDECYTLLCEAGVSILNQTPSAFRQLIAAQGQNPQSHSLRQVIFGGEALEPGMLKPWYARAINAGTQLVNMYGITETTVHVTYRALEAADAQLVGVSPIGVRIPDLQLYVLDARREPLPLGVVGELYVGGAGVARGYLNRDALTAERFLPDPATGLRMYKTGDLGRLLADGSVEYLGRNDDQVKIR	GAAACCCACGCCGCCGCCCAGCCTGAAGCCATTGCCTTGCGCTTCGACAACCAGCGCCTCACCTACCGCCAGCTCAACGAGCGCGCCAACCAAGTCGCCCACCGCCTGCTGGCCCAGGGCATCCGCCCGGATGACCGCGTGGCGATCTGCGTGGAGCGTGGCCCGGAAATGATCATCGGCCTGCTGGGCATCCTCAAGGCCGGCGCCGGCTACGTGCCGATCGACCCGGCGTACCCGCTGGAGCGCATCGCCTACACCCTAACCGACAGCGAACCCTTGGCCGTGTTGGTACAAGCCAACACGCGCCATCTGGTTGGCGACTTGCCACAGGTCGACCTCAACGGCCTGCGCGGTGAATCCATCGTCAACCCGCGGGTCAACGTCAGCCCGGCCCACCTG…	CCCCCCCC(O)CC(=O)N[C@@H](CC(C)C)C(=O)N[C@H](CCC(O)=O)C(=O)N[C@@H]1C(C)OC(=O)[C@@H](NC(=O)[C@@H](CO)NC(=O)[C@H](CC(C)C)NC(=O)[C@@H](CO)NC(=O)[C@H](CC(C)C)NC(=O)[C@H](NC1=O)C(C)C)[C@@H](C)CC	['Structure-based inference', 'Sequence-based prediction']	['pubmed:11358168']
BGC0001312	NRP	Pseudomonas fluorescens SBW25	viscosin	nrpspksdomains_PFLU_2552_AMP-binding.2	valine	val	FEAQALARPEAVAAVHGPLSLSYRDLNRRANRLAHHLLNQGVQPGESVAIALPRSLDLLICQLAILKCAAVYVPLDVNAPVERQAFIVQDSGAHRVLSSLVDLNLDGLSPRNPELPQSSESVAYILYTSGSTGAPKGVQVPHRAISRLVLNNGYAEFNARDRVAFASNPAFDASTLDVWAPLLNGGCVVVVEHAVLLSQAAFAALLQEQSVSVLWMTAGLFHQYADALMPVFHQLRYLIVGGDVLDPQVIGRVLEHGKPQHLLNGYGPTEATTFSTTFEITRVGEGGIPIGKPIANAQAYVLDARQQPVPLGVVGELYIGGAGVATGYLNQPQLTAEKFIPNPFGDGVLYRTGDLACWQADGTLLYQGRNDLQVKIR	TTCGAGGCTCAGGCGCTGGCCCGTCCGGAAGCGGTGGCAGCGGTGCATGGCCCGCTGTCGTTGAGCTACCGCGACCTCAACCGGCGCGCGAACCGCCTGGCCCATCACCTGCTCAACCAGGGCGTGCAGCCGGGCGAAAGCGTGGCGATTGCGCTGCCGCGTTCGCTCGACCTGTTGATCTGCCAACTGGCGATCCTCAAATGCGCGGCGGTGTATGTACCGCTGGACGTCAATGCGCCGGTCGAGCGCCAGGCGTTTATCGTGCAAGACAGTGGCGCGCATCGGGTGCTCAGCAGCCTCGTAGACCTGAACCTGGACGGCCTGTCGCCGCGTAACCCTGAACTGCCCCAGTCCTCGGAGAGCGTCGCCTACATCCTCTACACCTCCGGTTCCACCGGT…	CCCCCCCC(O)CC(=O)N[C@@H](CC(C)C)C(=O)N[C@H](CCC(O)=O)C(=O)N[C@@H]1C(C)OC(=O)[C@@H](NC(=O)[C@@H](CO)NC(=O)[C@H](CC(C)C)NC(=O)[C@@H](CO)NC(=O)[C@H](CC(C)C)NC(=O)[C@H](NC1=O)C(C)C)[C@@H](C)CC	['Structure-based inference', 'Sequence-based prediction']	['pubmed:11358168']
BGC0001312	NRP	Pseudomonas fluorescens SBW25	viscosin	nrpspksdomains_PFLU_2552_AMP-binding.3	leucine	leu	FEVQAERQPQAVAVLQGGEALTYEQLNQRANQLAHHLLALGVQPDDRVALCCRRGPQMLVGLLGILKAGAGYVPIDPAYPAERIAYLLHDSAPVVAVAEASTRALLGEVASVDLHDPRLQHLAVTNPPLDTLTPAHLAYVIYTSGSTGQPKGVMVEHRTVENLVNWHCEAFGLGATGHTSSVAGFGFDAMAWEVWPALCVGATLHLPPANVGNENIDELLAWWLAQPLDVSFLPTPVAEYAFSQQLQHPTLRILLIGGDRLRQFTHERRFAVINNYGPTEATVVATSGRVRAGQVLHIGRPIANASVYLLDAQLRPVPVGVTGELYVGGSGVARGYLNRPDLTAERFLQDPFNAGRMYRTGDLARWLPDGNIEYLGRNDDQVKLR	TTTGAGGTCCAGGCCGAACGCCAACCCCAGGCCGTCGCGGTGCTGCAAGGCGGTGAGGCGTTGACCTATGAACAACTCAACCAGCGCGCCAACCAACTGGCCCATCACTTGCTGGCACTCGGTGTACAGCCCGACGACCGTGTCGCGCTCTGCTGCCGTCGCGGCCCGCAGATGCTGGTGGGCTTGCTGGGCATCCTCAAGGCCGGTGCCGGTTACGTGCCCATCGACCCGGCGTATCCCGCCGAGCGCATCGCCTACCTGCTGCACGACAGCGCACCCGTGGTGGCGGTGGCCGAAGCCAGTACTCGCGCGTTATTGGGCGAGGTCGCCAGCGTAGACCTGCATGACCCACGCTTGCAGCACCTCGCCGTCACCAACCCACCACTCGACACGCTGACC…	CCCCCCCC(O)CC(=O)N[C@@H](CC(C)C)C(=O)N[C@H](CCC(O)=O)C(=O)N[C@@H]1C(C)OC(=O)[C@@H](NC(=O)[C@@H](CO)NC(=O)[C@H](CC(C)C)NC(=O)[C@@H](CO)NC(=O)[C@H](CC(C)C)NC(=O)[C@H](NC1=O)C(C)C)[C@@H](C)CC	['Structure-based inference', 'Sequence-based prediction']	['pubmed:11358168']
BGC0001312	NRP	Pseudomonas fluorescens SBW25	viscosin	nrpspksdomains_PFLU_2552_AMP-binding.4	serine	ser	FEAQAERTPEAVAVIAAEQRLTYQALNERANRLAHHLRERGVLPDTRVGICLERGLDMVVGLFAILKAGGAYVPLDPAYPQERIAYMLQDSAPVVVLAQATTHALLGDVPVIELDHVTWQHQPATNPQVPGLTARHAAYVIYTSGSTGEPKGVINEHAGVVNRLLWMQDAYGLNAEDAVLQKTPFSFDVSVWEFFWPLFTGARLVMARPGGHKDPAYLCEVIEAQRITTLHFVPSMLDVFLAHGDVSQAEGLVRVMCSGEALPGSLVRRFKQQLPGIGLYNLYGPTEAAVDVTAWNCARPEVPDNTPIGKPIANTRMYVLDAQLQPVPLGVVGELFIGGVQVARGYLNRAQLTAERFLKDPFTGGRLYRTGDVGRYLPDGNIEYLGRNDDQVKIR	TTCGAAGCCCAGGCCGAGCGCACGCCGGAGGCGGTGGCGGTGATTGCCGCAGAGCAACGGCTGACCTACCAGGCACTCAACGAACGCGCCAATCGCCTGGCCCATCATCTGCGTGAGCGCGGCGTACTGCCGGATACACGGGTGGGGATCTGCCTCGAGCGTGGCCTGGACATGGTGGTCGGCCTGTTCGCCATCCTCAAGGCCGGCGGCGCCTACGTGCCGCTGGACCCGGCCTACCCCCAGGAGCGCATCGCCTACATGCTGCAGGACAGCGCGCCGGTGGTGGTCCTCGCGCAAGCAACCACCCACGCGCTGCTGGGCGACGTGCCGGTGATCGAGCTTGATCACGTCACGTGGCAGCACCAGCCCGCGACCAACCCCCAGGTCCCGGGCCTGACC…	CCCCCCCC(O)CC(=O)N[C@@H](CC(C)C)C(=O)N[C@H](CCC(O)=O)C(=O)N[C@@H]1C(C)OC(=O)[C@@H](NC(=O)[C@@H](CO)NC(=O)[C@H](CC(C)C)NC(=O)[C@@H](CO)NC(=O)[C@H](CC(C)C)NC(=O)[C@H](NC1=O)C(C)C)[C@@H](C)CC	['Structure-based inference', 'Sequence-based prediction']	['pubmed:11358168']
BGC0001312	NRP	Pseudomonas fluorescens SBW25	viscosin	nrpspksdomains_PFLU_2553_AMP-binding.1	leucine	leu	EAQAALTPDAIAAVYQGRQQTYAELNQQANLLAHHLLALGVMPDDRVAIVARRGLDTLAGLLAILKAGACYVPVDPSHPAERLNYLLSDSAPVAVLTQQALLERLPALDVPVINLDRYTWQHHSASNPKVAVTPSNLAYVIYTSGSTGLPKGVMVEHHTVANLVDWHCNAFDLCAGRHTASVAGFGFDAMAWEVWPALCVGATLHLPPAHDGAEDVDALLAWWCAQPLDVCFLPTPVAEYAFSQQIEHPTLRTLLIGGDRLRQFGRAQRFDLINNYGPTEATVVATSGKVEAGQPLHIGKPIANATVYLLDEQQRPVPLGVAGELYVGGKGVARGYLNRPELTAERFLHDPFNAGRMYRTGDLARWLPDGNLEYLGRNDDQVKIR	GAAGCCCAGGCCGCGCTGACGCCTGATGCGATTGCCGCCGTGTATCAAGGCCGCCAGCAGACGTATGCCGAACTCAACCAGCAAGCCAACCTGCTGGCCCATCACTTGCTGGCGCTGGGGGTCATGCCCGACGACCGCGTTGCCATCGTTGCCCGCCGTGGCCTGGACACCCTGGCCGGCCTGTTGGCGATTCTCAAGGCCGGCGCCTGCTATGTGCCGGTGGACCCGTCGCACCCGGCCGAGCGCCTCAACTACCTGCTCAGCGACAGCGCCCCGGTGGCGGTGTTGACCCAGCAGGCCTTGCTGGAACGCCTGCCGGCCCTGGATGTGCCGGTGATCAACCTCGATCGCTACACCTGGCAGCACCATTCGGCGAGCAACCCCAAGGTGGCGGTCACG…	CCCCCCCC(O)CC(=O)N[C@@H](CC(C)C)C(=O)N[C@H](CCC(O)=O)C(=O)N[C@@H]1C(C)OC(=O)[C@@H](NC(=O)[C@@H](CO)NC(=O)[C@H](CC(C)C)NC(=O)[C@@H](CO)NC(=O)[C@H](CC(C)C)NC(=O)[C@H](NC1=O)C(C)C)[C@@H](C)CC	['Structure-based inference', 'Sequence-based prediction']	['pubmed:11358168']
BGC0001312	NRP	Pseudomonas fluorescens SBW25	viscosin	nrpspksdomains_PFLU_2553_AMP-binding.2	serine	ser	FEGQAMRTPDAVAVKAGDRVLTYAELNARANQLAHHLLALGVQPDSRVAICVERGLDMVIGLYAILKAGAAYVPLDPAYPLERIAYMLEDSAPVTVLAQGATRALLGDVAVVDLDQPTWQHQPVDNLRVAGVSAYVIYTSGSTGQPKGVINDHPGVVNRLLWMQDAYGLQAHDRVLQKTPFSFDVSVWEFFWPLFTGACLVMARPGGHRDPAYLCEVIAAERITTLHFVPSMLDVFLAHGDVSQAEGLVRVMCSGEALPGSLVRRFKQQLPGSQLHNLYGPTEAAVDVTAWNCAGAVTPDNTPIGKPIANTRMYVLDAHLQPVPLGVVGELFIGGVQVARGYLNRAELTAERFLKDPFTDGRLYRTGDVGRYLADGTLEYLGRNDDQVKIR	TTCGAAGGGCAGGCGATGCGTACGCCGGATGCCGTGGCGGTCAAGGCCGGTGATCGGGTATTGACCTATGCCGAGCTGAATGCGCGGGCCAACCAGCTCGCTCACCACCTGTTGGCGCTTGGCGTACAGCCGGACTCACGGGTGGCGATCTGCGTCGAACGTGGCCTGGACATGGTCATCGGCCTGTACGCGATCCTCAAGGCCGGTGCCGCCTATGTGCCGCTGGACCCGGCGTATCCGCTGGAGCGTATCGCCTACATGCTGGAAGACAGCGCGCCTGTCACGGTGCTGGCCCAAGGCGCGACACGTGCACTGCTGGGGGACGTGGCGGTGGTCGACCTGGACCAGCCGACCTGGCAGCACCAACCCGTCGACAACCTGCGAGTGGCTGGCGTCAGT…	CCCCCCCC(O)CC(=O)N[C@@H](CC(C)C)C(=O)N[C@H](CCC(O)=O)C(=O)N[C@@H]1C(C)OC(=O)[C@@H](NC(=O)[C@@H](CO)NC(=O)[C@H](CC(C)C)NC(=O)[C@@H](CO)NC(=O)[C@H](CC(C)C)NC(=O)[C@H](NC1=O)C(C)C)[C@@H](C)CC	['Structure-based inference', 'Sequence-based prediction']	['pubmed:11358168']
BGC0001312	NRP	Pseudomonas fluorescens SBW25	viscosin	nrpspksdomains_PFLU_2553_AMP-binding.3	isoleucine	ile	FEAQAQARPAALAALQGEQSHGVVTMSYGELNTRANRLAHHLMGLGVRPADHVAILLPRSLDLLVSQLAVLKCAAAYVPLDINAPAERQGFMLQDSGAAWLLTRSDASVDYPAQRLDLDTLVLDPQPSHNPDLSQSSDSVAYIMYTSGSTGTPKGVLVPHRGITRLVLNNGYADFNASDRVAFASNPAFDASTMDVWGPLLNGGQVQVIDHATLLDPTVFGAALADVTVLFVTTALFNQYVQLIPQALAGLRILLCGGERADPAAFRSLLARAPALRLVHCYGPTETTTYATAYEVRSLAEDADSVPIGRPISNTQIHVLDAQLQPVPLGVTGEICIGGDGVAKGYLNRPALTAEKFVRDPFDADALMYRTGDLGRWTAGGLLECIGRNDDQVKIR	TTCGAAGCCCAGGCCCAGGCCCGTCCTGCTGCGTTGGCGGCGCTGCAGGGCGAGCAGTCACACGGCGTCGTGACAATGAGTTACGGCGAACTCAACACGCGCGCCAATCGCCTGGCTCATCATCTGATGGGCCTTGGGGTGCGTCCCGCCGATCATGTGGCGATCCTGCTGCCGCGCTCGCTGGACCTGCTGGTCAGCCAGTTGGCCGTGCTCAAATGCGCTGCCGCGTATGTGCCGCTGGATATCAACGCCCCCGCCGAGCGCCAGGGCTTCATGCTGCAGGACAGTGGTGCGGCCTGGCTGCTGACCCGCAGCGACGCGTCCGTTGACTACCCGGCGCAGCGCCTGGACCTGGACACCCTGGTCCTCGATCCGCAACCGAGCCACAACCCGGACCTG…	CCCCCCCC(O)CC(=O)N[C@@H](CC(C)C)C(=O)N[C@H](CCC(O)=O)C(=O)N[C@@H]1C(C)OC(=O)[C@@H](NC(=O)[C@@H](CO)NC(=O)[C@H](CC(C)C)NC(=O)[C@@H](CO)NC(=O)[C@H](CC(C)C)NC(=O)[C@H](NC1=O)C(C)C)[C@@H](C)CC	['Structure-based inference', 'Sequence-based prediction']	['pubmed:11358168']
BGC0001346	NRP	Pseudomonas fluorescens	bananamide 1	nrpspksdomains_banA_AMP-binding.1	leucine	leu	EAQTAAQPEALAAAFQGQRLTCTELNRQANALAHHLIGLGVQPDDRVALVARRGLDTLVALLAILKSGAAYVPVDPAHPAERLSYLLSDSAPVVVLTQRHLRDRLPLLNVPVIDIDTRAWPINDLNPDVPGLTAEHLAYVIYTSGSTGQPKGVMVEHRTLSNLVDWHCSAFELCAGRHTSSLAGFGFDAMAWEVWPALCAGATLHLAPSRDGGEDIDALLEWWRAQPLDVSFLPTPIAEYAFTRHLEHPTLRTLLIGGDRLRQFNREQTFEVINNYGPTEATVVATSGRIEPGRTLHIGQPVSNTTIYLLDDRQRPVPIGVPGELYVGGAGVARGYFNRPKLTAERFLDDPFSTRPNARMYRTGDLARWRPDGNIEYLGRNDDQVKIR	GAGGCGCAAACGGCAGCGCAGCCCGAGGCGCTCGCCGCAGCGTTTCAGGGGCAGCGGCTGACTTGCACCGAACTGAACCGGCAGGCCAACGCCCTGGCCCATCACTTGATCGGACTCGGCGTACAACCCGACGACCGCGTGGCGCTGGTCGCCCGCCGAGGGCTGGACACACTGGTCGCGCTGCTGGCGATCCTCAAGTCCGGCGCCGCTTACGTGCCGGTCGATCCGGCGCATCCTGCGGAACGTTTGAGCTATTTATTGAGCGACAGCGCGCCGGTCGTGGTCCTGACCCAGCGCCATCTGCGTGACCGGTTGCCGCTGCTGAACGTACCGGTGATCGATATCGACACGCGTGCCTGGCCGATCAACGATCTCAACCCCGACGTCCCGGGCCTGACC…	O=C(C(CC(C)C)NC(CC(O)CCCCCCCCC)=O)NC(CC(O)=O)C(NC(C(OC(C(CC(C)C)NC1=O)=O)C)C(NC(C(C)CC)C(NC(CC(C)C)C(NC(CCC(N)=O)C(NC1CC(C)C)=O)=O)=O)=O)=O	['Sequence-based prediction']	['pubmed:27798598']
BGC0001346	NRP	Pseudomonas fluorescens	bananamide 1	nrpspksdomains_banA_AMP-binding.2	aspartic acid	asp	FEQQVQRRPDAIALQAGEQQLTYRQLNEQANRLAHHLREQGVQPDARVAICVERSLDLIVGLLGILKAGGAYVPLDPDYPLERLHYMLQDSAPVAVLVHGTTRDLLGDADVPVIDLDRCTWQHASTDNPHVPGLSASNLAYMIYTSGSTGTPKGVMIEHRSACNMVHWGSQISPPTGYGALLQKAPFSFDSSVWEIFWPLCSGLRLVLARPDGNRDSAYVTQVIRERQITVVKFVPALLQQFIEQDDVSHCTSLTDVLNGGGELTAALARRVRERLPWVRLHNVYGPTETTVDSTGWTLEPDQPVPDAVVPIGKALSNTRLYVLDARDQPVPFGVSGHLHIGGVGVARGYLGLPDMQAERFIDSPFVTGDRLYRTGDLVRYRADGNLEFLGRNDFQIKLR	TTCGAGCAGCAGGTGCAACGCCGACCCGACGCCATCGCGCTGCAGGCCGGTGAGCAGCAACTGACGTATCGCCAACTGAACGAGCAGGCCAATCGCCTGGCGCATCATCTGCGCGAACAGGGTGTGCAGCCCGACGCTCGGGTGGCGATCTGCGTCGAGCGCAGCCTGGATCTGATAGTTGGCCTGCTTGGCATTCTCAAGGCGGGCGGTGCCTATGTGCCGCTGGATCCCGACTATCCGCTGGAACGCCTGCACTACATGTTGCAGGACAGCGCCCCGGTGGCAGTGCTGGTGCACGGGACCACCCGCGATCTGCTGGGTGATGCGGACGTGCCGGTCATCGATCTCGACCGATGCACCTGGCAGCACGCCTCCACCGACAACCCGCATGTACCCGGT…	O=C(C(CC(C)C)NC(CC(O)CCCCCCCCC)=O)NC(CC(O)=O)C(NC(C(OC(C(CC(C)C)NC1=O)=O)C)C(NC(C(C)CC)C(NC(CC(C)C)C(NC(CCC(N)=O)C(NC1CC(C)C)=O)=O)=O)=O)=O	['Sequence-based prediction']	['pubmed:27798598']
BGC0001346	NRP	Pseudomonas fluorescens	bananamide 1	nrpspksdomains_banB_AMP-binding.1	threonine	thr	FEAQAHTRPEAVALLFDGRTCSYETLNRQANRVAHRLLALGIRPDDRVAICVERGPQMIVGLLGVLKAGAGYVPIDPAYPLERIAFTLQDSAPVVVLMQAATLDRIVGLCVPQIDLDDHALQTEPDFNPQIPGLTPAHLAYVIYTSGSTGVPKGVMVEHRNVARLFGATHDWFRFNAQDVWALFHSFAFDFSVWEIWGALAYGGQLLVVPQHISRSPDECYALLCRTGVTVLNQTPSAFRQLIAAQGRSLLQHSLREVIFGGEALEPGSLKPWYARVGNAGTRLVNMYGITETTVHVTYRPLVAADAQLTAGSPIGVRIPDLQLYVLDARREPVPAGVTGELYVGGAGVARGYLNREALTAERFIADPFSGHAEARLYKTGDLARWTVEGELEYLGRND…	TTCGAAGCGCAGGCGCACACTCGGCCCGAGGCGGTTGCGTTGCTGTTCGATGGCAGGACTTGCAGTTATGAAACACTCAACCGGCAGGCCAACCGGGTGGCCCATCGTTTGCTCGCCCTCGGCATTCGCCCTGATGACCGGGTAGCGATCTGCGTCGAGCGCGGCCCGCAAATGATCGTCGGCCTGCTTGGCGTGCTGAAGGCGGGCGCCGGTTATGTGCCGATCGATCCGGCTTATCCGCTGGAACGGATCGCCTTCACCCTGCAAGACAGTGCGCCGGTGGTGGTGCTGATGCAGGCAGCGACTCTGGATCGGATTGTCGGGCTCTGCGTGCCGCAGATTGATCTCGACGACCACGCTTTGCAGACCGAACCTGATTTCAACCCGCAGATCCCGGGC…	O=C(C(CC(C)C)NC(CC(O)CCCCCCCCC)=O)NC(CC(O)=O)C(NC(C(OC(C(CC(C)C)NC1=O)=O)C)C(NC(C(C)CC)C(NC(CC(C)C)C(NC(CCC(N)=O)C(NC1CC(C)C)=O)=O)=O)=O)=O	['Sequence-based prediction']	['pubmed:27798598']
BGC0001346	NRP	Pseudomonas fluorescens	bananamide 1	nrpspksdomains_banB_AMP-binding.2	leucine	leu	FEERAAIQPDTVAVVQGGQSLSYDELNRRANRLAHHLIGLGVQPDDRVALCVQRGPQMLVGLLAILKAGAGYVPVDPAHPAERITYLLQDSDPVAVLAQTTTRDLLGAVPVINLDSDAWQHLPDSNPQLPGLTPAHLAYVIYTSGSTGQPKGVMVEHSTLENLVHWHAEAFDLHAGSHTASVAGFGFDAMAWEVWPALCVGATLHLPPESVSNEHLDELLDWWRAQPLQVSFLPTPVAEYAFSRELQHPALRTLLIGGDKLRQFNREQSFAVINNYGPTEATVVATSGPVEVGQPLHIGRPMANARVYLLDDQQRPVPVGVTGELYVGGAGVARGYLNRPELTAERFLNDPFNEGRMYRTGDLARWLADGNIEYLGRNDDQVKLR	TTTGAAGAGCGAGCGGCGATCCAGCCCGACACTGTGGCAGTGGTGCAGGGCGGGCAAAGTCTGAGCTACGACGAGTTGAACCGCCGTGCCAACCGCCTGGCCCACCACTTGATCGGCCTCGGTGTGCAACCGGACGATCGCGTTGCGCTCTGCGTGCAGCGTGGGCCGCAGATGCTGGTCGGGCTGCTGGCGATCCTCAAGGCTGGCGCCGGTTATGTTCCGGTTGATCCGGCACATCCGGCAGAACGGATCACTTATCTGTTGCAGGACAGCGATCCGGTAGCGGTGCTGGCACAGACGACCACCCGCGACCTGCTGGGCGCCGTGCCGGTGATCAATCTGGACAGCGACGCTTGGCAGCATCTGCCGGACAGCAACCCACAGTTGCCGGGCCTGACC…	O=C(C(CC(C)C)NC(CC(O)CCCCCCCCC)=O)NC(CC(O)=O)C(NC(C(OC(C(CC(C)C)NC1=O)=O)C)C(NC(C(C)CC)C(NC(CC(C)C)C(NC(CCC(N)=O)C(NC1CC(C)C)=O)=O)=O)=O)=O	['Sequence-based prediction']	['pubmed:27798598']
BGC0001346	NRP	Pseudomonas fluorescens	bananamide 1	nrpspksdomains_banB_AMP-binding.3	leucine	leu	FEAQVARTPDAVAVQAGTQRLTFRQLNQRANRLAHHLLGMGVTGDTRVAICLKRSPEMLVGLLAILKAGAAYVPVDPAYPPERIAYMLGDSAPTVILVRDAALPNQAGVPVIDLAHETWQDLSDADPQVADFTPDNLAYVIYTSGSTGQPKGVMVEHSTLENLVHWHAEAFDLHAGSHTASVAGFGFDAMAWEVWPALCVGATLHLPPESVSNEHLDELLDWWRAQPLQVSFLPTPVAEYAFSRELQHPALRTLLIGGDKLRQFNREQSFAVINNYGPTEATVVATSGPVEVGQPLHIGRPIANARIYLLDDQQRPVPVGVTGELYVAGAGVARGYLNRPELTAERFLTDPFSDQPQARMYRTGDLARWLADGNIEYLGRNDDQVKLR	TTCGAGGCGCAGGTTGCACGCACGCCGGATGCCGTGGCGGTTCAAGCGGGCACGCAGCGCCTGACTTTCAGGCAATTGAACCAGCGCGCCAATCGCCTGGCCCATCATCTGCTGGGGATGGGGGTCACCGGCGATACGCGAGTGGCGATCTGTCTCAAACGCAGCCCGGAAATGCTGGTCGGGTTGCTGGCGATTCTCAAGGCCGGCGCCGCCTATGTACCGGTCGACCCGGCTTATCCGCCCGAGCGCATCGCTTACATGCTGGGCGACAGTGCGCCGACGGTGATACTGGTTCGCGACGCAGCACTGCCGAATCAGGCTGGCGTACCGGTGATTGATCTCGCTCATGAGACCTGGCAAGACCTGTCGGATGCTGACCCGCAGGTCGCCGATTTTACG…	O=C(C(CC(C)C)NC(CC(O)CCCCCCCCC)=O)NC(CC(O)=O)C(NC(C(OC(C(CC(C)C)NC1=O)=O)C)C(NC(C(C)CC)C(NC(CC(C)C)C(NC(CCC(N)=O)C(NC1CC(C)C)=O)=O)=O)=O)=O	['Sequence-based prediction']	['pubmed:27798598']
BGC0001346	NRP	Pseudomonas fluorescens	bananamide 1	nrpspksdomains_banB_AMP-binding.4	glutamine	gln	FEAQVQRTPQAIALQAGERQLTYAELNAQANRLAHHLRELGVGPDSRVAICVERGLELMVGLLGILKAGGAYVPLDPAYPAERLDYMLKDSAPVAVLVHGATRALLDESTALVIDLDQEHWRYNPDANPQVPGLSASNLAYVIYTSGSTGAPKGVMVEHRGVTNLLHWSSQLCPAVTDGALLQKTPFSFDASVWELFWPLSAGLRLVLARPDGHREPKYLAQLICEQQISVIQFVPVLLQQFLELDEVSQCSSLTDVFCGGGDLTPALARRVRERLPQVRLHNVYGPTEATVDSTVWTLEPSMPVPDSALPIGRPISNTRLYVLDAAGLPVPMGVIGQLFIGGAGVARGYLGLPQLMAERFINSPFVAGDRLYATGDRVRYRADGQLEFIGRNDFQVKLR	TTCGAGGCGCAAGTCCAACGCACGCCGCAAGCCATCGCTTTGCAGGCCGGTGAACGGCAACTGACCTACGCCGAACTCAACGCACAGGCCAACCGTCTGGCCCATCACCTGCGCGAACTGGGCGTGGGGCCGGATTCGCGGGTGGCGATCTGTGTCGAGCGCGGGCTGGAACTGATGGTCGGTCTGCTCGGCATCCTCAAGGCGGGTGGTGCCTATGTGCCGCTGGATCCGGCGTACCCGGCGGAACGTCTGGATTACATGCTCAAGGACAGTGCCCCGGTGGCGGTGCTGGTTCACGGGGCGACTCGCGCATTGCTTGACGAAAGCACTGCGCTGGTGATCGATCTGGATCAGGAACACTGGCGATACAACCCGGATGCCAATCCGCAAGTCCCGGGC…	O=C(C(CC(C)C)NC(CC(O)CCCCCCCCC)=O)NC(CC(O)=O)C(NC(C(OC(C(CC(C)C)NC1=O)=O)C)C(NC(C(C)CC)C(NC(CC(C)C)C(NC(CCC(N)=O)C(NC1CC(C)C)=O)=O)=O)=O)=O	['Sequence-based prediction']	['pubmed:27798598']
BGC0001346	NRP	Pseudomonas fluorescens	bananamide 1	nrpspksdomains_banC_AMP-binding.1	leucine	leu	FEAQVLARPQALAAVHQDRQLTFHELNRQANRLAHRLIDLGVQPDDRVAVVARRGLDTLAGLLAVLKAGAGYVPIDPAHPTERLNYLLGDCAPVAILTSRDLLARLPAQELPVLDLDPRTWRSGNDANPVVPGLSEANLAYVIYTSGSTGLPKGVMVEHQTLANLVDWHSNAFDLCAGRHTSSLAGFGFDAMAWEIWPSLSVGATLHLAPAQDGGEDVDGLLAWWCAQPLDVSFLPTPVAEYAFSRHLEHPTLRTLLIGGDRLRQFSRNQHFDVINNYGPTEATVVATSGRIEAGEALHIGKPVSNTKVYLLDDQQRPVPIGVSGELYIGGSGVARGYLNRAQLTAERFLPDPFSERPNARMYRTGDLARWCPDGRIEYLGRNDDQVKIR	TTCGAGGCGCAGGTCCTTGCGCGACCGCAAGCGCTGGCAGCGGTGCACCAGGACAGGCAACTGACGTTCCACGAACTGAATCGCCAGGCCAACCGTCTGGCGCATCGCTTGATTGATCTGGGTGTGCAGCCGGATGACCGGGTCGCAGTCGTGGCCCGTCGAGGACTGGATACCCTGGCCGGATTGCTCGCAGTCCTCAAGGCTGGCGCCGGGTATGTGCCGATCGACCCGGCGCATCCGACCGAACGCCTGAATTACCTGCTGGGTGATTGCGCACCGGTGGCGATCCTGACTTCACGTGATTTGCTCGCACGGCTGCCGGCGCAGGAGCTGCCGGTTCTCGATCTCGACCCGCGCACCTGGCGCTCAGGCAATGACGCAAACCCTGTGGTTCCGGGT…	O=C(C(CC(C)C)NC(CC(O)CCCCCCCCC)=O)NC(CC(O)=O)C(NC(C(OC(C(CC(C)C)NC1=O)=O)C)C(NC(C(C)CC)C(NC(CC(C)C)C(NC(CCC(N)=O)C(NC1CC(C)C)=O)=O)=O)=O)=O	['Sequence-based prediction']	['pubmed:27798598']
BGC0001346	NRP	Pseudomonas fluorescens	bananamide 1	nrpspksdomains_banC_AMP-binding.2	isoleucine	ile	FEMRTAERPQAIAAVHGMQALSYAELNRRANGLAHHLIARGVRPGDHVAILLPRSLELLVAQLAIIKCAAAYVPLDINAPAERQAFMVQDCQAVALLTGSDQSVDYPVRRVDLDTLALAGSPSHNPDLPQSSEALAYIMYTSGSTGTPKGVMVPHRGITRLVIDCGYADFNPGDRIAFASNPAFDASTMDIWGALLNGGQVVVIDHATLLDPQAFGRELDRCGATILFVTTALFNQYVQLIPEALKGLRILLCGGERGDPAAFRKLLAEAPELRLVHCYGPTETTTYATTLEVREVAPDADSVSIGGPIGNTRVYVLDTRQQPVPFGVTGELYIGGQGVALGYLNRPQLSAEKFLRDPFSDNPQALMYRTGDLVRWQAPGRLECIGRNDDQVKIR	TTCGAAATGCGCACCGCGGAGCGACCGCAAGCCATCGCTGCGGTGCACGGGATGCAGGCGTTGAGTTACGCAGAATTGAACCGCCGCGCCAACGGCCTGGCTCATCATCTCATCGCCCGGGGAGTGCGGCCCGGCGACCATGTGGCGATCCTGTTGCCACGCTCGCTGGAGCTGTTGGTCGCGCAGTTGGCGATCATCAAGTGTGCGGCGGCCTATGTGCCGCTGGACATCAACGCACCCGCCGAGCGTCAGGCATTCATGGTGCAGGATTGTCAGGCGGTCGCGCTGTTGACCGGCAGCGATCAGTCCGTCGATTACCCGGTAAGACGAGTGGATCTGGATACCCTGGCGCTTGCCGGGAGCCCTTCGCACAACCCGGATCTGCCTCAGTCCTCGGAG…	O=C(C(CC(C)C)NC(CC(O)CCCCCCCCC)=O)NC(CC(O)=O)C(NC(C(OC(C(CC(C)C)NC1=O)=O)C)C(NC(C(C)CC)C(NC(CC(C)C)C(NC(CCC(N)=O)C(NC1CC(C)C)=O)=O)=O)=O)=O	['Sequence-based prediction']	['pubmed:27798598']
BGC0001416	NRP	Pseudomonas sp. In5	nunapeptin	nrpspksdomains_AL066_08460_AMP-binding.1	threonine	thr	FEEQARRTPQSIAVSMGTQSLTYRALNELSNQLARRLRAAGVVPQDLVAILLERSLDMIVATLAVLKSGAAYVPIDPTSPSDRIAYVLQDSGARKAIALADMAAELGELGIEVFDPNPLSTQTSPEVQRASVNLSNVNAPDHLCYVIYTSGSTGQPKGALLEHRNVIRLLHNSRTPFHFDADDVWSLFHSNAFDFSVWEMFGALLHGARLSLVPEALRRDPQDFLAFIESDGITVLNQTPSAFHQLSGVATSRPDVTLAQLRYVILGGESLEPARLDAFHRAFPHVALINMYGITETCVHVTYKHLEAADIAEGISNVGRPIPTTVTYIMDAQQRLMPVGVPGEICVGGQGVGRGYLNRPELTAERFIVDPFRPRERLYRSGDLGKLLGNGEIVHLGRM…	TTCGAAGAGCAGGCCCGCCGCACGCCGCAAAGCATCGCGGTGAGCATGGGCACGCAAAGCCTGACCTACCGCGCGCTCAACGAATTGTCGAACCAACTCGCCCGCCGACTGCGCGCCGCCGGTGTGGTGCCGCAAGACCTCGTCGCGATCCTGCTCGAACGCTCGCTGGACATGATCGTCGCCACCCTCGCCGTGCTCAAATCCGGCGCGGCGTATGTGCCCATCGATCCAACCTCACCGTCGGACCGCATCGCGTATGTGCTGCAGGACAGTGGCGCGCGCAAGGCGATTGCCCTGGCGGACATGGCCGCAGAACTGGGCGAACTGGGCATCGAAGTGTTCGACCCCAACCCCCTGAGCACTCAGACTTCGCCCGAAGTGCAGCGCGCCTCGGTGAAC…	[]	['Structure-based inference', 'Mass spectrometry', 'Homology']	['pubmed:25784695']
BGC0001416	NRP	Pseudomonas sp. In5	nunapeptin	nrpspksdomains_AL066_08460_AMP-binding.2	threonine	thr	FEQFAATHPENVALVFGDVHMSYRKLNRRANRIAAQLLALGVKADDRVAILSGRGLEMVCAVLGVLKAGAAYVPLDPAYPAERLNYLLSDSAPVVMLAQPDCLDVLPALDIRVVLLNTESDEYSLSDASFDINPVVDTLPQHLAYVIYTSGSTGLPKGVLVEHGNVARLFDTTRELFRFNRDDVWTLFHSFAFDFSVWEIWGALSYGGKLVIVPTDVARSADEFYGLVCRQNVTVLNQTPSAFRQFIDASGRSDQVHGLREVIFGGEALDFISLRPWIARTPLAQTRLVNMYGITEITVHATYHAVTQSEIDAGAPSLIGTALPDLCLRILDDYQRPVPVGVHGEIYIGGAGVARNYLNRPELNAERFIADPYGPQRLYRTGDVARYRADGGIVYIGRN…	TTTGAGCAGTTCGCAGCCACCCATCCAGAGAACGTTGCCCTGGTGTTTGGCGACGTACACATGAGTTACCGCAAACTGAATCGCAGGGCCAACCGCATCGCCGCGCAACTGCTGGCGCTCGGGGTGAAAGCCGATGATCGGGTGGCGATTCTCAGCGGTCGCGGGCTGGAAATGGTCTGCGCCGTGCTCGGTGTGCTCAAGGCCGGCGCCGCGTATGTGCCGCTGGACCCGGCCTACCCGGCCGAACGCCTCAACTATCTGCTGAGCGACAGCGCCCCGGTGGTGATGCTCGCGCAGCCAGACTGCCTCGACGTGCTGCCGGCGCTGGATATCCGGGTGGTGCTGTTGAATACCGAGAGCGACGAATATTCGCTGTCGGATGCATCGTTCGATATCAAT…	[]	['Structure-based inference', 'Mass spectrometry', 'Homology']	['pubmed:25784695']
BGC0001416	NRP	Pseudomonas sp. In5	nunapeptin	nrpspksdomains_AL066_08460_AMP-binding.3	aspartic acid	asp	FEAQVRARPQAIALVHEDQQLSYAQLNRRANHLARRLIALGLQPDQRVALCAERSLEMIVGLLGVLKAGGAYVPIDPAHPVERMAFMLSDSTPLAVLTQQALATQLPVGETPLLLLDERESLLAADDPVYDLDPVIPGLTPNHLAYVIYTSGSTGQSKGVMVEHHSVHNFWQVLQRTTHQHCPEYATVALNAGFYFDMSIKGISQLFSGHKLVIIPQQIRGSGNELLDFLEQHQVHAFDSTPSQLDGLLNAGLLERSSYQPVSVLLGGEAINAAMWSKLRDCQSIRFYNMYGPTEATVDATIDLIRDLGEKPSIGRPFANVQVHVLDAHGQPTPLGVAGELHIGGAGVARGYLNRPEMSAERFIADPFSSLPQARLYKTGDLGRWQADGTLEYLGRNDF…	TTTGAAGCGCAGGTGCGAGCCCGTCCGCAGGCGATTGCGCTGGTTCATGAGGATCAGCAACTCTCCTATGCCCAGCTCAACCGTCGCGCCAACCACTTGGCTCGACGCTTGATTGCCCTTGGCCTGCAACCGGATCAGCGTGTGGCGCTGTGTGCCGAGCGCAGTCTGGAGATGATTGTCGGGTTGCTCGGTGTGCTCAAGGCGGGCGGCGCTTATGTGCCGATTGACCCGGCACATCCGGTTGAGCGCATGGCATTTATGCTCAGCGACAGCACGCCTCTCGCCGTCCTCACTCAACAGGCCCTGGCCACGCAACTGCCGGTCGGTGAAACGCCATTGTTGCTGCTGGATGAGCGCGAATCGCTGCTGGCTGCCGATGATCCTGTCTACGATCTCGAC…	[]	['Structure-based inference', 'Mass spectrometry', 'Homology']	['pubmed:25784695']
BGC0001416	NRP	Pseudomonas sp. In5	nunapeptin	nrpspksdomains_AL066_08490_AMP-binding.1	threonine	thr	FSAKAREFPERTAVSDETRALSYAELEAVSSKLAARLRHEGVTDGMLVGLCLERSADLVIGLLGILKAGAAYVPVDPLYPAKRLEHIVRDSGISLMISSKDVASVPATPSLRVLHLDALLSGPEVETTAPKLNAATAPAYVIYTSGSTGEPKGVLVAHGNVSSLLESTQRSYGFSKTDVWSMFHSIGFDFSVWEIWGALAHGGQVAVVPYDVSRSPESFRKWLVRNGVTVLSQTPSAFRGLDEVDRLAKDRLALRYVVFGGEALPATVLRPWVERHGDEKPALINMYGITEATVHTTYKRVRGQDLESSAMVSIGQPLDGWKLNLLDVNQVPVAQGSTGELYIEGAGVAQGYLNRIALSAERFVTLPGHTSPAYRTGDLLMQGADGEYRYVGRCDEQLK…	TTCAGTGCCAAGGCCCGCGAATTTCCCGAGCGAACGGCTGTGTCCGACGAAACCCGGGCCTTGAGCTATGCGGAACTGGAAGCCGTTTCATCGAAACTCGCGGCACGCCTGCGTCATGAAGGGGTGACTGACGGCATGCTCGTGGGCCTGTGCCTGGAGCGCAGCGCCGACCTAGTGATCGGCCTGCTCGGCATTCTGAAAGCCGGCGCCGCCTATGTGCCGGTTGACCCGCTGTACCCGGCCAAACGCCTCGAACACATCGTGCGCGACAGCGGCATCAGCTTGATGATTTCCTCGAAAGATGTCGCCAGCGTTCCGGCAACTCCGTCGCTGCGTGTGTTGCACCTTGACGCTCTGCTGAGCGGCCCTGAAGTCGAAACAACCGCACCAAAACTCAAT…	[]	['Structure-based inference', 'Mass spectrometry', 'Homology']	['pubmed:25784695']
BGC0001416	NRP	Pseudomonas sp. In5	nunapeptin	nrpspksdomains_AL066_08515_AMP-binding.1	valine	val	FEAQVLAHPDATAAVHDGQRLTYRELNAKANGLAHYLVDLGVRPGESVAILLERSLELLISQLAVLKCAAVYVPLDISAPVERQGFMVQDSGARMVLTLSTESVPEDARRVDLDRVALDGFAHDQHLPQSSESPAYIMYTSGSTGTPKGVLVPHRAINRLVINNGYADFNAEDRVAFASNPAFDASTLDVWAPLLNGGCVVIVEQDVLLSQERFRALLLEQKISVLWMTAGLFHQYAAGLMSVFGQLRYLIVGGDVLDPAVISRVLKEGAPQHLLNGYGPTEATTFTTTYEINTVGEGSIPIGRPVGNSRVYVLDAWQRPVPVGVAGELYIGGDGVANGYLNRPELTAEKFVADPFNADPSALLYRTGDLARWLADGNVEYLGRNDDQVKIR	TTTGAAGCGCAGGTTCTGGCTCATCCCGATGCGACAGCGGCGGTCCACGACGGGCAACGCCTGACTTATCGTGAACTCAATGCCAAGGCCAATGGCCTGGCCCATTACCTTGTCGACCTCGGCGTGCGGCCGGGCGAATCCGTGGCGATTCTGCTGGAGCGTTCCCTTGAACTGCTGATCAGCCAGTTGGCCGTACTCAAATGTGCTGCGGTCTACGTGCCGCTGGACATCAGTGCGCCGGTCGAGCGCCAGGGCTTTATGGTGCAGGACAGCGGTGCGCGGATGGTGCTGACGTTGAGCACGGAATCGGTGCCTGAAGATGCTCGGCGTGTGGATCTGGATCGCGTGGCGCTTGATGGTTTTGCTCATGATCAGCACCTGCCACAGTCCAGCGAATCG…	[]	['Structure-based inference', 'Mass spectrometry', 'Homology']	['pubmed:25784695']
BGC0001416	NRP	Pseudomonas sp. In5	nunapeptin	nrpspksdomains_AL066_08515_AMP-binding.2	alanine	ala	FEAQVERTPDAVAVVYGEQRLSYRELNERANRLAHYLRGQGVKPDSRVAICVERSADMVVGLLAILKAGGGYVPLDPAYPLDRIAYMLEDSAPAVVLAQTATLGLLSEASMPVIDLDHSIWQDESVANPVIEGLTSAHLAYVIYTSGSTGLPKGVMIEHRNTVNFLTWAHRSFDNATLAKTLFSTSLNFDLAVYECFAPLTSGGSIDVVTNVLELRDDITLINTVPSALKALLESGGLSKNVHTVNVAGEALKRSLVENLFEQTQVQRLCNLYGPSETTTYSSWVSMDREDGFAAHIGKPVANTQFYLLDEHQQPVPLGVPGEIYIGGAGVARGYLNRDDLTAERFLTDPFRTNARIYRTGDLGRYLKDGNIEYLGRNDDQVKIR	TTTGAGGCGCAGGTAGAGCGCACGCCGGATGCGGTGGCGGTGGTTTATGGCGAGCAACGGTTGAGTTATCGCGAGCTGAATGAGCGGGCGAACCGCTTGGCGCATTATCTGCGCGGGCAGGGTGTGAAACCTGATTCGCGAGTGGCGATTTGTGTTGAGCGTAGTGCCGACATGGTCGTTGGGCTGTTGGCGATTTTGAAGGCGGGCGGGGGTTATGTGCCGTTGGATCCTGCGTATCCGCTGGATCGGATTGCCTACATGCTCGAAGACAGCGCGCCGGCTGTGGTGTTGGCGCAGACCGCAACGCTGGGGCTTCTGAGTGAAGCGTCGATGCCGGTGATCGATCTGGATCACAGCATTTGGCAGGACGAATCCGTCGCCAATCCCGTGATTGAAGGT…	[]	['Structure-based inference', 'Mass spectrometry', 'Homology']	['pubmed:25784695']
BGC0001416	NRP	Pseudomonas sp. In5	nunapeptin	nrpspksdomains_AL066_08515_AMP-binding.3	valine	val	FEAQVHAQPEATAAVHDTQMLTYNELNIRANQLAHHLIGLGVQPGDSVAILLERSLELLISQLAILKCAAVYVPLDFSAPTERQGFMVQDSGARMVLTLSTTTVPEDAKRVDLDSVTLDNLTTDPQLPQSSEAPAYIMYTSGSTGTPKGVLVPHRAINRLVINNGYAEFNAQDRVAFASNPAFDASTLDVWAPLLNGGCVVIVEQDVLLSQERFSALLLEQKISVLWMTAGLFHQYAAGLMSVFGQLRYLIVGGDVLDPAVIGRVLKEGAPQHLLNGYGPTEATTFSATYEIKKAGEGSIPIGRPVGNTRLYLLDPQGSPVPIGVAGELYIGGDGVAKGYLNRPELTAEKFVADPFSTEPQALLYRTGDLGRWLPDGNVEYLGRNDDQVKIR	TTCGAAGCGCAGGTCCACGCCCAGCCAGAGGCCACAGCGGCAGTCCACGACACGCAAATGCTGACTTACAACGAACTCAACATCCGCGCCAATCAACTGGCTCACCACCTGATTGGCCTCGGCGTACAACCGGGCGATTCCGTGGCAATTCTGCTGGAGCGCTCCCTTGAGCTGTTGATCAGCCAGTTGGCGATCCTCAAATGCGCGGCGGTCTATGTGCCGCTGGACTTCAGCGCGCCCACCGAGCGTCAAGGTTTCATGGTGCAGGACAGCGGGGCACGAATGGTGCTCACGTTGAGCACAACCACGGTGCCCGAAGACGCGAAGCGCGTGGATCTGGACAGCGTAACCCTCGATAACCTGACCACTGACCCGCAACTGCCACAGTCCAGCGAAGCC…	[]	['Structure-based inference', 'Mass spectrometry', 'Homology']	['pubmed:25784695']
BGC0001416	NRP	Pseudomonas sp. In5	nunapeptin	nrpspksdomains_AL066_08515_AMP-binding.4	threonine	thr	FEARAAAQPDAVAVVYEDLSLTYGELNARANQMAHRLLALGVRPDDRVAICVERGLEMIVGLLGILKSGAGYVPLDPAYPAERIAYMLYDSAPVALLTQLPLRDQLPQMNIPTLLLDLIEASHEAPPAQHNPDIPGLTSAHLAYVIYTSGSTGLPKGVMIEHRNVARLFSATQPWFNFGPQDVWALFHSFAFDFSVWEIWGALTHGGQLLVVPQLVSRSPQYCYALLCEAGVTILNQTPSAFRQLIAAQGEIDLSHSLRQVIFGGEALETGILKPWYARAQNAQTQLVNMYGITETTVHVTYRALDAADAQLIGVSPIGGRIPDLQLYVLDAQCEPVPVGVIGEMYVGGAGVARGYLNRDELTAERFLDNPFSAEPGARMYRTGDLGRWLADGSVEYLG…	TTCGAAGCCCGGGCCGCCGCGCAGCCCGACGCCGTGGCGGTGGTCTATGAAGACCTGAGCCTGACCTACGGCGAACTCAACGCTCGCGCCAATCAGATGGCCCACCGTTTGCTCGCACTCGGTGTGCGCCCGGATGATCGGGTGGCGATCTGCGTCGAGCGTGGTCTGGAAATGATCGTCGGTCTGCTCGGCATCCTCAAGTCCGGCGCCGGCTACGTGCCACTGGACCCGGCTTACCCGGCCGAGCGCATCGCCTACATGCTCTACGACAGCGCCCCGGTGGCACTGCTGACTCAACTGCCATTGCGCGATCAACTGCCGCAAATGAACATCCCGACGCTGCTGCTCGACCTGATCGAAGCCAGCCACGAAGCGCCGCCCGCGCAACACAACCCAGAC…	[]	['Structure-based inference', 'Mass spectrometry', 'Homology']	['pubmed:25784695']
BGC0001416	NRP	Pseudomonas sp. In5	nunapeptin	nrpspksdomains_AL066_08515_AMP-binding.5	threonine	thr	FETRAAAQPDAVAVVFEDLTLTYGELNAQANQVAHHLIGLGIRPDERVAICVERGLEMIVGLLGILKSGAGYVPLDPAYPQDRISYLLEDSTPAAVLAQASTRWLLEAVAVPVVDLDGGSWQGESVTNPDVDGLTSAHLAYVIYTSGSTGLPKGVMVEHRNVARLFSATEAWFNFGPQDVWALFHSFAFDFSVWEIWGALTHGGRLLVVPQLVSRSPADCYALLCEAGVTVLNQTPSAFRQLIAAQNTTAHSLRQVIFGGEALDTGILKPWYARSQNAQTQLVNMYGITETTVHVTHRPLTAADALLVGVSPIGGRIPDLQLYVLDARLEPVPVGVVGEMYVGGAGVARGYLNRPELNTERFIPDIFSGRADARLYRTGDLGRWLADGTVEYLGRNDDQ…	TTTGAAACCAGGGCGGCGGCGCAACCTGATGCCGTGGCGGTGGTGTTTGAAGATTTGACGCTGACTTACGGCGAACTCAACGCCCAAGCCAACCAGGTCGCCCATCACCTGATCGGCTTGGGCATTCGCCCGGATGAGCGGGTGGCGATTTGTGTTGAACGCGGTCTGGAGATGATCGTCGGCTTGCTGGGGATCCTGAAGTCCGGCGCCGGTTATGTGCCGCTGGATCCGGCGTATCCGCAGGATCGCATTAGCTACCTGCTGGAAGACAGCACGCCGGCTGCGGTGCTGGCTCAAGCCTCCACGCGGTGGTTGCTGGAGGCGGTCGCAGTGCCGGTGGTTGATCTTGATGGCGGCAGCTGGCAGGGCGAATCCGTCACCAATCCTGATGTTGACGGT…	[]	['Structure-based inference', 'Mass spectrometry', 'Homology']	['pubmed:25784695']
BGC0001416	NRP	Pseudomonas sp. In5	nunapeptin	nrpspksdomains_AL066_08515_AMP-binding.6	alanine	ala	FEAQVERTPDAVAVVHGLEQLSYRELNNRANQLAHYLRGLGVKPDSRVAICVERSADMVVGLLAILKAGGGYVPLDPAYPLDRIAYMLEDSAPAVVLAQASTLGLLAEASMPVIDLDSGIWQDESVSNPVIDGLTSAHLAYVIYTSGSTGLPKGVMIEHRNTVNFLTWAHRSFDEATLAKTLFSTSLNFDLAVYECFAPLTSGGRITVVKNVLEPQHDITLINTVPSALKALLESGGLSANVHTVNVAGEALKRSLVENLFEQTSVQRLCNLYGPSETTTYSSWVSMDREDGFAAHIGKPVANTLFYLLDEHGQPVPLGVAGEIYIGGAGVARGYLNRDDLTAERFLTDPFSTNGRMYRTGDLGRYLPDGNIEYLGRNDDQVKIR	TTTGAGGCGCAGGTTGAGCGCACGCCGGATGCGGTGGCTGTGGTTCATGGCTTGGAACAGTTGAGCTATCGCGAGTTGAATAATCGCGCTAACCAATTGGCGCATTATCTGCGCGGGCTAGGTGTGAAGCCGGATTCGCGAGTGGCGATTTGTGTTGAGCGCTCGGCGGATATGGTTGTTGGGTTGTTGGCGATTCTGAAGGCGGGCGGGGGTTATGTGCCGCTCGATCCGGCGTATCCGCTGGACCGGATTGCCTACATGCTGGAAGACAGCGCGCCGGCTGTGGTGTTGGCGCAGGCCTCCACACTTGGATTGTTGGCCGAAGCTTCGATGCCAGTGATCGATCTCGATAGTGGCATTTGGCAGGACGAATCCGTCTCCAATCCTGTGATTGATGGG…	[]	['Structure-based inference', 'Mass spectrometry', 'Homology']	['pubmed:25784695']
BGC0001416	NRP	Pseudomonas sp. In5	nunapeptin	nrpspksdomains_AL066_08515_AMP-binding.7	2,4-diaminobutyric acid	dab	FEAQVEAQPDAIAVVFDGEQLSYAELNRQANQLAHHLIGLGIRPDDRVAICVERGAEMLVGLLAILKSGAGYVPLDPAYPAERLAYMLSDSTPSLLLTQRALQANLPTLDIPVVLLDKVERIVDGYDDNPVILSLGVRHLAYVIYTSGSTGTPKGVMIEHRGLVNYTLDAIRLFGLTNADTVLQQNTLNFDLSVEEIFPALIAGATLAPSRNIFGTSQDDVRPTFLHLTAAHWHTLAAEWHYNPALAQEQLRDVRLINVTGDALSTQKLQMWEQIRPAHTRLVNTYGPTEATVSCTASYVTFEALNSNASIGTPMANTRIYLLDAHLKPVPFGVTGEIYIGGDGVARGYLNLDKITAERFLADPFSDVHNARMYKTGDLARYRPDGGLEYQGRNDFQVK…	TTTGAAGCCCAGGTCGAAGCGCAACCGGATGCCATCGCGGTGGTCTTCGACGGCGAGCAATTGAGCTACGCCGAATTGAACCGCCAGGCCAACCAACTGGCGCATCACCTGATCGGTTTGGGCATTCGCCCGGATGATCGGGTGGCGATTTGCGTCGAACGTGGCGCGGAAATGCTGGTCGGCTTGCTGGCGATCCTCAAATCCGGTGCCGGTTATGTGCCGTTGGATCCGGCTTATCCGGCTGAACGTCTGGCCTATATGCTCAGCGACAGCACCCCTTCGTTGTTGCTGACCCAACGTGCATTACAAGCGAATTTGCCAACGCTGGACATTCCGGTGGTCCTGCTCGATAAAGTCGAACGCATCGTCGACGGCTACGACGACAATCCGGTGATCCTG…	[]	['Structure-based inference', 'Mass spectrometry', 'Homology']	['pubmed:25784695']
BGC0001416	NRP	Pseudomonas sp. In5	nunapeptin	nrpspksdomains_AL066_08515_AMP-binding.8	serine	ser	FEAQVASRPDAIAVSFEHSHWTYAELNRHANQVAHRLIELGIRPDDRVAICVDRSLEMVAGLLGILKSGAAYVPLDPDYPADRLAYMLENSAPAVVLTQRSLQGSLPATDADILLLDGDGFSNQPTVDPVVESLSADNLAYVIYTSGSTGMPKGVMNEHAGVVNRLLWMQDEYQLTAADTVLQKTPFSFDVSVWEFFWPLFTGARLVMARPGGHREPAYLREVIQTERITTLHFVPSMLDVFLAAGDVSECKGLVRVMCSGEALPGQLVRRFKLQLPGTELHNLYGPTEAAVDVTAWNCAGPDTPDSTPIGKPVANTQIYLLDAHQQPVPMGVAGEIYIAGVQVARGYLHRPELTGERFLTDPFSTTQNARMYRTGDLGRYLADGNIIYLGRNDDQVKIR	TTTGAGGCGCAAGTGGCTTCGCGTCCGGATGCGATCGCGGTGAGCTTTGAACACAGTCACTGGACGTATGCCGAACTGAATCGCCATGCCAACCAGGTTGCCCATCGCCTGATTGAACTGGGTATTCGCCCGGATGACCGCGTGGCGATTTGTGTGGATCGTAGTCTGGAAATGGTCGCGGGGTTGCTGGGCATCCTGAAATCCGGTGCGGCGTATGTGCCGCTGGATCCGGATTACCCGGCGGATCGTTTGGCCTACATGCTGGAGAACAGTGCTCCAGCCGTAGTCCTGACCCAACGTTCATTGCAGGGCAGTTTGCCGGCAACAGACGCGGACATTTTGCTGCTGGACGGTGACGGCTTCTCGAATCAACCGACCGTAGATCCCGTCGTAGAAAGC…	[]	['Structure-based inference', 'Mass spectrometry', 'Homology']	['pubmed:25784695']
BGC0001416	NRP	Pseudomonas sp. In5	nunapeptin	nrpspksdomains_AL066_08515_AMP-binding.9	isoleucine	ile	FEAQAAARPDAIAVEHAGLQMTYGELESRANRLAHYLRDQGVTPQARVAILLNRSFDLIISELAILKCAAVYVPLDHHAPQDRQRFMLEDSAATLILTSSDRVVPEGTLRVDLDTLLLPDESPAAEPIQASDTPAYIMYTSGSTGQPKGVIVPHLAIGRLVINNVYADFSEQDRVAFASNPAFDASTMEVWGALLNGGRIVVIDHEALLNPTSFAEVLTDSGATALFLTTAMFNHYVMLIPDALARLRILMCGGERADPMSFRRLLAHAPALQLLNCYGPTETTTFATTQRVTSVPDGAVNIPIGRPISNTRIYILNAAGQPVPVGVAGEIHIGGAGVALGYLNRPDLTKESFIIDPFSDTTGARLYRTGDLGRWLPDGSVEYLDRNDGQVKIR	TTTGAAGCCCAGGCTGCGGCGCGTCCCGACGCAATTGCCGTCGAACATGCCGGGCTGCAAATGACTTACGGCGAGCTGGAGTCGCGGGCCAATCGCCTGGCACATTACCTGCGCGACCAAGGCGTCACGCCGCAAGCGCGCGTGGCGATTCTGTTGAATCGTTCGTTCGACCTGATCATCAGCGAACTGGCGATCCTCAAGTGCGCCGCCGTGTATGTGCCGTTGGATCATCATGCACCGCAGGACCGCCAGCGCTTCATGCTGGAGGACAGCGCGGCAACGTTGATCCTGACCAGCAGCGACCGCGTTGTGCCCGAAGGCACGTTGCGGGTAGATCTGGACACGCTGCTGCTGCCGGATGAGTCGCCTGCCGCCGAACCGATCCAGGCCAGCGATACC…	[]	['Structure-based inference', 'Mass spectrometry', 'Homology']	['pubmed:25784695']
BGC0001416	NRP	Pseudomonas sp. In5	nunapeptin	nrpspksdomains_AL066_08505_AMP-binding.1	threonine	thr	FEAQVLAQPDAVAVVYEDQQLTYSQLNARANQVAHQLLALGIRPDDRVAICVERGLEMIVGLMGILKSGAGYVPLDPTYPLERLTFMLDDSAPVALLTQSGLLQLLPALEAPVLLLDQLEASDLQHNPDVNVLSQHLAYVIYTSGSTGLPKGVMVEHRNVARLFSATQDWFNFGPQDVWALFHSFAFDFSVWEIWGALIHGGRLLVVPQLVSRSPADCYALLCEAGVTVLNQTPSAFRQLIAAQSDTLHSLRQVIFGGEALETGILKPWYAREANTKTQLVNMYGITETTVHVTYRPLTAADAQLVGISPIGKRIPDLRLYLLDSHGQAVPVGVEGELYVGGAGVARGYLNRPELNATRFLDDPFSDTPHARMYRTGDLGRWLADGNLEYLGRNDDQVK…	TTTGAAGCCCAGGTACTGGCGCAACCCGATGCGGTTGCAGTGGTTTACGAAGATCAACAACTAACCTACAGCCAGTTGAATGCCCGGGCGAATCAGGTCGCGCATCAGTTGCTGGCGCTGGGCATTCGCCCGGATGACCGGGTGGCGATTTGTGTTGAACGTGGTCTGGAGATGATCGTTGGTCTGATGGGGATCCTGAAGTCCGGCGCAGGCTATGTGCCGCTGGACCCGACGTATCCGCTGGAACGCCTGACGTTCATGCTCGACGACAGCGCACCGGTTGCGCTGCTGACTCAATCGGGTCTGCTTCAATTGCTGCCGGCACTGGAGGCCCCGGTGCTGTTGCTCGATCAGCTCGAGGCGTCGGATCTTCAGCACAATCCCGATGTTAACGTGCTG…	[]	['Structure-based inference', 'Mass spectrometry', 'Homology']	['pubmed:25784695']
BGC0001416	NRP	Pseudomonas sp. In5	nunapeptin	nrpspksdomains_AL066_08505_AMP-binding.2	proline	pro	FEAHAAEQPDAIAVTYEGQRLSYAELNQRANQIAHRLIELGIGADDRVAICVDRSLEMIAGLIGILKAGAGYVPLDPAYPAERLTYMLDDSAPKVLLTQRSLQERFPQLSVPVMLLDAEAGLNAQPQTNPDVRELTAQHLAYVIYTSGSTGQPKGVAMAHGPLVNLMQWQIAQSVPARTLQFAALGFDVAFQEVFSTLCAGAELSLIHADTRLNFHALFQHIAQQNIERLYLPCVALQALAESAISDGATEPLACGLRDVITAGEQLRITPQIRAFFERLPGCRLHNHYGPTESHVTTALTLPDDVAAWPILPAIGYPVANTRIYLLDEHLQPVPVGVAGEIHIGGACVARGYLNRPDMTAERFIRDPFYADGRLYKTGDLGRYQADGCIDYLGRNDDQ…	TTCGAAGCGCATGCGGCGGAGCAGCCGGATGCTATCGCGGTGACCTATGAAGGCCAGCGCCTCAGTTACGCCGAGCTCAATCAGCGCGCCAACCAGATCGCCCATCGCCTGATCGAACTGGGGATTGGCGCAGATGATCGCGTGGCGATTTGCGTGGACCGCAGCCTGGAAATGATCGCGGGCCTGATCGGCATCCTCAAGGCTGGCGCCGGTTATGTGCCGCTGGACCCGGCGTATCCCGCCGAGCGTCTGACCTACATGCTGGATGACAGCGCGCCGAAAGTGCTGCTGACTCAACGCAGCTTGCAGGAACGTTTCCCGCAGCTGAGCGTGCCGGTGATGTTGCTCGACGCCGAGGCGGGTCTCAACGCGCAGCCGCAAACCAATCCCGATGTTCGT…	[]	['Structure-based inference', 'Mass spectrometry', 'Homology']	['pubmed:25784695']
BGC0001416	NRP	Pseudomonas sp. In5	nunapeptin	nrpspksdomains_AL066_08505_AMP-binding.3	alanine	ala	FEAQVERTPDAVAVVYGLERLSYRELNSRANQLAHHLRGQGVKPDSRVAICVERSAEMVVGLLAILKVGGGYVPLDPAYPLDRIAYMLQDSAPAVVLAQASTLGLLADASMPVIDLGSGIWQDESVSNPVVEGLTSAHLAYVIYTSGSTGLPKGVMIEHRNTVNFLTWAHRSFDHATLAKTLFSTSLNFDLAVYECFAPLTSGGSIDVVTNVLELRDDITLINTVPSALKALLESGGLSANVHTVNVAGEALKRSLVESLFEQTSVQRLCNLYGPSETTTYSSWVSMDRQDGFAAHIGKPVANTQFYLLDEHQQPVPLGVPGEIYIGGAGVARGYLNRDDLTAERFLSDPFRPNARMYRTGDLGRYLPDGNIEYLGRNDDQVKIR	TTTGAGGCGCAGGTTGAGCGGACGCCGGATGCGGTGGCCGTGGTTTATGGCTTGGAGAGGTTGAGTTATCGCGAGCTGAATAGTCGCGCTAACCAATTGGCGCATCACCTGCGCGGGCAGGGTGTGAAACCCGACTCGCGAGTGGCGATTTGTGTTGAGCGCTCGGCGGAGATGGTCGTTGGGTTGCTGGCGATTTTGAAGGTGGGTGGCGGTTATGTGCCGCTGGATCCTGCGTATCCGCTGGATCGGATTGCCTACATGTTGCAGGACAGCGCGCCGGCTGTGGTGTTGGCTCAAGCTTCGACGCTGGGCTTGTTGGCCGACGCTTCGATGCCGGTGATCGATCTGGGTAGCGGCATTTGGCAGGACGAATCCGTCTCCAATCCCGTGGTTGAAGGG…	[]	['Structure-based inference', 'Mass spectrometry', 'Homology']	['pubmed:25784695']
BGC0001416	NRP	Pseudomonas sp. In5	nunapeptin	nrpspksdomains_AL066_08505_AMP-binding.4	alanine	ala	FEAQVERTPDAVAVIHGLNQLSYRELNERANRLAHYLRGQGVRPDSRVAICVERSAGMVVGLLAILKAGGGYVPLDPAYPLDRIAYMLQDSTPAVVLAQASTLGLLAEASMPVIDLDSSVWQDESVSNPVIEELTSSHLAYVIYTSGSTGLPKGVMIEHRNTVNFLTWAHRSFDDATLAKTLFSTSLNFDLAVYECFAPLTSGGSINVVTNVLELRDDITLINTVPSALKALLESGGLSKNVHTVNVAGEALKRSLVENLFEQTQVQRLCNLYGPSETTTYSSWVSMDREEGFAAHIGKPVANTQFYLLDEHQQPVPLGVPGEIYIGGAGVARGYLNRDDLTAERFLNDPFRPNARMYRTGDLGRYLPDGNIEYLGRNDDQVKIR	TTTGAGGCTCAGGTTGAGCGCACGCCGGATGCCGTGGCGGTGATTCATGGCTTAAACCAGTTGAGCTATCGCGAGCTGAATGAGCGGGCGAACCGGTTGGCGCATTACCTGCGCGGGCAGGGTGTGCGGCCTGATTCGCGAGTGGCGATTTGCGTAGAACGTAGTGCCGGCATGGTCGTCGGGTTGTTGGCGATATTGAAGGCGGGCGGCGGTTATGTGCCGCTGGATCCGGCGTATCCGCTGGATCGGATTGCCTACATGCTGCAAGACAGCACTCCCGCCGTGGTGTTGGCGCAAGCCTCGACATTGGGCTTGTTGGCCGAGGCGTCGATGCCGGTGATCGATCTGGATAGCAGCGTTTGGCAGGACGAATCCGTCTCCAATCCTGTGATTGAAGAG…	[]	['Structure-based inference', 'Mass spectrometry', 'Homology']	['pubmed:25784695']
BGC0001416	NRP	Pseudomonas sp. In5	nunapeptin	nrpspksdomains_AL066_08505_AMP-binding.5	alanine	ala	FEAQVERTPDAVAVIFGQHRLSYRELNERANRLAHYLRGQGVRPDSRVAICVERSADMVVGLLAILKAGGGYVPLDPAYPLDRIAYMLEDSAPAVVLAQAATLGLLAEASMPVIDLDSGIWKDESVSNPSIDGLTSAHLAYVIYTSGSTGLPKGVMIEHRNTVNFLTWAHRSFDEATLAKTLFSTSLNFDLAVYECFAPLTSGGSINVVTNVLELRDDITLINTVPSALKALLESGGLSKNVHTVNVAGEALKRSLVENLFEQTQVQRLCNLYGPSETTTYSSWVSMDREEGFAAHIGKPVANTQFYLLDEHQQPVPLGIPGEIYIGGAGVARGYLNRDDLTAERFLTDPFRTNARMYRTGDLGRYLPDGNIEYLGRNDDQVKIR	TTTGAGGCGCAGGTTGAGCGCACGCCGGATGCGGTGGCGGTGATTTTTGGCCAACACCGATTGAGTTATCGCGAGCTGAATGAGCGGGCGAACCGCTTGGCGCATTACCTGCGTGGGCAGGGCGTAAGGCCGGATTCGCGAGTGGCAATTTGCGTTGAACGTTCGGCGGATATGGTCGTTGGGTTGCTGGCGATTCTGAAGGCGGGCGGGGGTTATGTGCCCCTGGATCCGGCTTATCCGCTGGACCGGATTGCCTACATGCTGGAAGACAGCGCGCCGGCGGTGGTGTTGGCGCAAGCTGCGACATTGGGGTTGTTGGCCGAAGCTTCGATGCCGGTCATCGATCTGGATAGCGGGATTTGGAAGGACGAATCCGTCTCTAACCCTTCGATTGACGGT…	[]	['Structure-based inference', 'Mass spectrometry', 'Homology']	['pubmed:25784695']
BGC0001416	NRP	Pseudomonas sp. In5	nunapeptin	nrpspksdomains_AL066_08505_AMP-binding.6	valine	val	FEAQVLARPTATAAVHDGRSLTYSELNVRANRLAHHLISLGVQPGNNVSILLERSLDLLISQLAILKCAAVYVPLDVNAPTERQQFMLQDSQAEFVLTRREEDVALDVQRIDLDTRALDNLPSHNPQRPQSSETPAYIMYTSGSTGTPKGVLVPHRAITRLVINNGYAQFNARDRVAFASNPAFDASTLDVWAPLLNGGCVVVIAQDVLLSQERFSALLLEQKISVLWMTAGLFHQYAAGLMSMFGQLRYLIVGGDVLDPTVIGRVLKEGAPQHLLNGYGPTEATTFSTTYEIRSAGAGSIPIGRPVGNTRVYVLDAYQRPAPIGVAGELYIGGDGVANGYLNRPELTAEKFVADPFSTEPQALLYRTGDLARWLPDGNVEYLGRNDDQVKIR	TTCGAAGCGCAGGTTCTGGCCCGTCCGACCGCCACCGCAGCGGTCCACGATGGACGCAGCCTGACCTACAGTGAACTCAACGTCCGCGCCAACCGACTGGCGCATCACCTGATCAGCCTTGGCGTGCAACCCGGCAACAACGTGTCGATCCTGCTGGAGCGGTCGCTGGACCTGCTGATCAGCCAGTTGGCGATCCTCAAGTGCGCCGCCGTTTATGTACCGCTGGACGTCAACGCCCCGACTGAGCGCCAGCAGTTCATGCTGCAAGACAGCCAGGCTGAATTCGTACTGACTCGCCGCGAAGAAGACGTCGCGCTCGACGTACAGCGAATCGATCTGGACACCCGCGCGCTCGACAACCTGCCAAGCCATAACCCGCAACGGCCGCAGTCCAGCGAG…	[]	['Structure-based inference', 'Mass spectrometry', 'Homology']	['pubmed:25784695']
BGC0001416	NRP	Pseudomonas sp. In5	nunapeptin	nrpspksdomains_AL066_08505_AMP-binding.7	alanine	ala	FESQVERTPDAVAVVYGDQRLSYRELNERANRLAHYLRGQGVRPDSRVAICVERSADMVVGLLAILKAGGGYVPLDPAYPLDRIAYMLEDSAPAVVLAQASTLGLLAEASMPVIDLDNSVWQDESVANPSIEGLTPAHLAYVIYTSGSTGLPKGVMIEHRNTVNFLTWAHRSFDDATLAKTLFSTSLNFDLAVYECFAPLTSGGSIDVVTNVLELRDDITLINTVPSALKALLESGGLSKNVHTVNVAGEALKRSLVENLFEQTGVQRLCNLYGPSETTTYSSWVSMDREDGFAAHIGKPVANTQFYLLDEHQQPVPLGVPGEIYIGGAGVARGYLNRDDLTAERFLNDPFRTNARMYKTGDLGRYLPDGNIEYLGRNDDQVKIR	TTTGAGTCGCAGGTTGAGCGTACGCCGGATGCGGTGGCGGTGGTTTATGGCGATCAGCGGTTGAGCTATCGCGAGTTGAATGAACGGGCGAACCGGTTAGCGCATTACCTGCGCGGGCAGGGCGTGCGGCCGGATTCGCGGGTGGCGATTTGTGTAGAACGTAGTGCCGACATGGTCGTCGGGTTGTTGGCGATTCTGAAGGCGGGCGGGGGGTATGTGCCACTGGATCCGGCGTATCCGCTGGACCGGATTGCCTACATGCTCGAAGACAGCGCGCCGGCCGTGGTGTTGGCTCAAGCTTCGACATTGGGCTTGTTGGCCGAAGCTTCGATGCCGGTCATCGATCTGGATAACAGCGTTTGGCAGGACGAATCCGTCGCAAATCCTTCGATTGAAGGC…	[]	['Structure-based inference', 'Mass spectrometry', 'Homology']	['pubmed:25784695']
BGC0001416	NRP	Pseudomonas sp. In5	nunapeptin	nrpspksdomains_AL066_08505_AMP-binding.8	threonine	thr	FEAQASVQPDAVAVVFEDQSLTYGELNARANQVAHRLLSLGIRPDDRVAICVERGLEMIVGLLGILKSGAGYVPLDPAYPAERIAYMLEDSTPVAILVHAATRELLAEESVRVIDLDCASLHSQSTTNPPVPELTSAHLAYVIYTSGSTGLPKGVMVEHRNVARLFAATQAWFEFGPQDVWALFHSFAFDFSVWEIWGALTHGGRLLVVPQATSRSPDECYALLCEAGVTVLNQTPSAFRQLIAAQGEKPRAHNLRQVIFGGEALEPGLLKPWYARAVNDQTQLVNMYGITETTVHVTYRALQPVDAQRAGVSPIGGRIPDLQLYILNPQREPVPVGVIGEMYVGGAGVARGYLNRDELTAERFLSNPFSCEPNARMYRTGDLGRWLADGTVEYLGRND…	TTTGAAGCGCAAGCAAGCGTGCAGCCCGATGCAGTGGCGGTGGTGTTTGAGGATCAATCGCTGACTTATGGCGAACTCAACGCCCGGGCCAATCAGGTCGCCCATCGCCTGCTGTCGCTGGGTATTCGCCCGGATGACCGAGTGGCGATTTGCGTCGAACGTGGCCTGGAAATGATCGTCGGCCTGCTGGGTATCCTGAAATCCGGCGCCGGCTACGTGCCGCTGGACCCGGCGTATCCGGCAGAACGCATTGCCTACATGCTGGAAGACAGCACGCCCGTGGCGATCCTGGTTCACGCCGCCACCCGCGAGTTGCTGGCGGAAGAATCGGTGCGGGTGATCGACCTCGATTGCGCGTCGTTGCACAGCCAATCGACGACCAATCCGCCGGTGCCGGAG…	[]	['Structure-based inference', 'Mass spectrometry', 'Homology']	['pubmed:25784695']
BGC0001416	NRP	Pseudomonas sp. In5	nunapeptin	nrpspksdomains_AL066_08505_AMP-binding.9	serine	ser	FEQQVARRPEACAVSDDSGQVLTYAALNRRANQVAHQLIELGVGPDARVAVCLRRSPEMVIALLAILKAGGAYVPIDPDLPDARREYMLDDSAPLAVLSSAELAQTLPMPGAPVLVLDRDTYDFPDTNPQTPGLNATHLAYVLYTSGSTGMPKGVMNEHRGVVNRLLWARDEYRVDETDRVLQKTPFGFDVSVWEFFLPLLAGAQLVMARPGGHQEPDYIAHTIRSAGITLLHFVPSMLELFLERRDSQGFPGLRRVLCSGEALPRSLQKRFEQQLAEVELHNLYGPTEAAIDVTAWQCRPTDQGDSVPIGRPIANIQIHILDNHGAPTPLGIAGEINIGGVGVARGYLNLPELSAERFVADPFSSDPEARLYKTGDLGRWLPDGSVEYLGRNDFQVKIR	TTCGAGCAGCAAGTCGCCCGCCGTCCCGAGGCCTGTGCGGTCAGCGATGACAGCGGCCAGGTCCTGACCTACGCCGCGCTCAATCGCCGGGCCAACCAAGTCGCCCATCAGTTGATCGAACTCGGCGTCGGTCCCGATGCACGGGTTGCCGTGTGCCTGCGCCGTAGCCCGGAGATGGTGATTGCACTGTTGGCGATCCTCAAGGCCGGCGGCGCCTATGTGCCGATCGACCCGGATCTGCCGGACGCTCGCCGCGAATACATGCTCGACGACAGCGCGCCGTTGGCGGTGTTGAGCAGCGCGGAGTTGGCGCAAACCCTGCCAATGCCGGGCGCGCCGGTGTTGGTGCTGGATCGCGATACTTATGACTTCCCCGACACCAATCCGCAAACACCGGGC…	[]	['Structure-based inference', 'Mass spectrometry', 'Homology']	['pubmed:25784695']
BGC0001416	NRP	Pseudomonas sp. In5	nunapeptin	nrpspksdomains_AL066_08510_AMP-binding.1	valine	val	FEAQAEARSDAPAAVEAGQTLTYAELNAKAERLAAHLTSLGLQPGEAVAILLPRSLDLLVSQLAILKCAAVYVPLDINAPVERQHFMLQDSRAVLALTRSGEGLADGVRRVDLDTIDYANQPVRNAPRPQSSETPAYIMYTSGSTGTPKGVLVPHRAISRLVINNGYADFNSADRVAFASNPAFDASTLEVWAPLLNGGCVVVVEQEVLLSQARLREWLLAQSVSVLWMTAGLFHQYADGLMPVFGQLRYLIVGGDVLDPAVIGRVLRDGAPQHLLNGYGPTEATTFSTTFEITSVGSGSIPIGRPIGNTKVYVLDAQLRTVPLGVPGELFIAGAGVANGYLNRPELSAEKFIADPFNGQSMYRTGDLGRHLPDGTIEYLGRNDDQVKIR	TTCGAAGCCCAGGCCGAGGCTCGCTCCGACGCGCCCGCCGCCGTAGAAGCAGGGCAAACCCTGACCTATGCCGAGCTGAACGCCAAGGCCGAACGCCTGGCCGCACACCTGACCAGCCTTGGCCTGCAACCGGGCGAAGCGGTGGCGATCCTGCTGCCACGCTCGCTGGATTTGCTGGTCAGCCAACTGGCGATCCTCAAATGCGCGGCGGTGTATGTGCCGCTGGACATCAATGCGCCCGTCGAACGCCAGCACTTCATGCTGCAAGACAGCCGTGCCGTGCTGGCCTTGACTCGCAGTGGCGAGGGGTTGGCCGACGGCGTGCGCAGGGTCGATCTGGATACGATTGATTACGCCAATCAACCGGTCCGCAACGCACCGCGCCCGCAATCCAGCGAA…	[]	['Structure-based inference', 'Mass spectrometry', 'Homology']	['pubmed:25784695']
BGC0001416	NRP	Pseudomonas sp. In5	nunapeptin	nrpspksdomains_AL066_08510_AMP-binding.2	isoleucine	ile	FEAQVARTPDAVAAVHGQETLSYAALNQRANQLAHHLIGLDVQPDDRVAILLPRSLDLLASQLAALKCAAAYVPLDRNASLERQRFMLEDSQASVLLTFSDQDAPEGARRIDLDRLNLDGRTAHDPALAQSAETIAYIMYTSGSTGQPKGVLVPHRAINRLVINNGYADFNAQDRIAFASNPAFDASTMDVWGALLNGGRVIVIDHETLLEPSRFAAVLTESGATVLFVTTAIFNQYVQLIPQAIGGLRILLCGGERADAASFRRLLSLAPNLRLVHCYGPTETTTYATTYEVKTVAPDAESVPIGGPISNTQLYLLDARQQLAPLGVVGEIYIGGRGVAKGYLNRPELTAQAFIADPFSDEPGALLYRTGDLGRWLPEGQLECLGRNDDQVKIR	TTCGAAGCGCAAGTGGCACGTACACCGGACGCGGTCGCGGCGGTGCACGGTCAGGAAACCTTGAGCTACGCCGCATTGAATCAGCGGGCGAACCAACTGGCGCATCACCTGATCGGCCTGGACGTGCAACCGGACGACCGCGTGGCGATCCTGCTGCCGCGTTCCCTCGACTTGCTGGCCAGCCAACTGGCGGCGCTCAAATGCGCGGCGGCCTATGTGCCGCTGGACCGCAATGCGTCCCTGGAACGCCAGCGCTTTATGCTGGAAGACAGCCAGGCCTCGGTGTTGCTGACGTTCAGCGATCAGGATGCGCCTGAAGGTGCGCGCCGTATCGATCTGGACCGGTTGAATCTGGACGGCCGAACCGCTCACGACCCGGCTCTGGCGCAGTCCGCCGAA…	[]	['Structure-based inference', 'Mass spectrometry', 'Homology']	['pubmed:25784695']
BGC0001416	NRP	Pseudomonas sp. In5	nunapeptin	nrpspksdomains_AL066_08510_AMP-binding.3	serine	ser	FEAQVSSGPDAVAVSFEDSHWTYAELNRHANQIAHRLIELGIRPDDRVAICVDRSLEMVAGLLGILKSGAAYVPLDPDYPADRLAYMLENSAPAVVLTQRSLQGSLPATDADILLLDGDGFSNQPTVDPVVESLSADNLAYVIYTSGSTGMPKGVMNEHGGVVNRLLWMQDEYQLTPSDSVLQKTPFSFDVSVWEFFWPLFTGARLVMARPGGHREPAYLREVIQTERITTLHFVPSMLDVFLAAGDVSDCKGLVRVMSSGEALPGQLVRRFKLQLPGTELHNLYGPTEAAVDVTAWNCAGPDTPDSTPIGKPVANTQIYLLDAHQQPVPMGVAGEIYIAGVQVARGYLHRPELTVERFLTDPFSTTQNARMYRTGDLGRYLADGNIIYLGRNDDQVKIR	TTTGAAGCGCAGGTGAGTTCGGGGCCTGATGCGGTTGCGGTGAGCTTTGAAGACAGTCACTGGACGTATGCTGAGCTGAATCGCCATGCCAACCAGATTGCCCATCGCCTGATTGAACTGGGTATTCGCCCGGATGACCGCGTCGCAATTTGCGTGGACCGTAGCCTGGAGATGGTCGCGGGGTTGCTGGGGATTCTGAAATCCGGCGCCGCGTATGTGCCGCTGGACCCGGATTACCCGGCTGATCGGCTGGCCTACATGCTGGAGAACAGTGCTCCAGCCGTAGTCCTGACCCAACGTTCATTGCAGGGCAGTTTGCCGGCAACAGACGCGGACATTTTGCTGCTGGACGGTGACGGCTTCTCGAATCAACCGACCGTAGATCCCGTCGTAGAAAGC…	[]	['Structure-based inference', 'Mass spectrometry', 'Homology']	['pubmed:25784695']
BGC0001416	NRP	Pseudomonas sp. In5	nunapeptin	nrpspksdomains_AL066_08510_AMP-binding.4	alanine	ala	FEAQVERTPDVVAVVFGEQRLSYRELNERANRLAHHLRGQGVRPDSRVAICVERSADMVVGLLAILKAGGGYVPLDPAYPLDRIAYMLQDSAPAVVLAQASTLGLLAQASMPVIDLDSSIWQDESVSNPVIEGLTSAHLAYVIYTSGSTGLPKGVMIEHRNTVNFLTWAHRSFDGATLAKTLFATSLNFDLAVYECFAPLTSGGSINVVTNVLEPRDDITLINTVPSALKALLESGGLSKSVHTVNVAGEALKRSLVENLFEQTSVQRLCNLYGPSETTTYSSWVSMDREDGFAAHIGKPVANTQFYLLDEHQQPVPLGVPGEIYIGGAGVARGYLNRDDLTAERFLTDPFRTNARMYRTGDLGRYLKDGNIEYLGRNDDQVKIR	TTTGAGGCGCAGGTGGAGCGTACGCCAGATGTTGTGGCCGTAGTTTTTGGCGAGCAGCGGCTGAGTTATCGCGAGCTGAATGAGCGGGCGAACCGCTTGGCGCATCATTTGCGCGGGCAGGGCGTCCGGCCGGATTCTCGGGTGGCGATTTGTGTTGAGCGCAGTGCCGACATGGTCGTCGGGTTGTTGGCGATTCTGAAGGCGGGCGGGGGTTATGTGCCGCTGGATCCTGCATATCCGCTGGATCGGATTGCCTACATGTTGCAGGACAGCGCGCCGGCGGTGGTGTTGGCGCAAGCCTCGACATTAGGACTGTTAGCTCAAGCGTCGATGCCGGTGATCGATCTGGATAGCAGCATTTGGCAGGATGAATCCGTCTCCAATCCTGTGATTGAAGGG…	[]	['Structure-based inference', 'Mass spectrometry', 'Homology']	['pubmed:25784695']
BGC0001416	NRP	Pseudomonas sp. In5	nunapeptin	nrpspksdomains_AL066_08465_AMP-binding.1	serine	ser	FEQQVALRPAANAVSDDSGQVLSYAELNRQSNQLAHRLIELGVGPDARVAVCLRRSPEMVIALLAILKAGGAYVPIDPDLPVSRREYMLDDSAPLAVLSSEALLATLPALSVPVLVLDRDAHDFPDTNPHVSGLNATHLAYVLYTSGSTGMPKGVMNEHRGVVNRLLWARDEYRVDETDRVLQKTPFGFDVSVWEFFLPLLAGAQLVMARPGGHQEPIYIAKVIRSAGITMLHFVPSMLELFLEDRDSQGFPDLRRVLCSGEALPRSLQKRFEQQLAEVELHNLYGPTEAAIDVTAWHCRPTDRGDSVPIGRPIANIQIRILDSFGEPTPKGVAGEINIGGVGVARGYLNLPELSAERFVADPFSKDPEARLYKTGDLGRWLADGSIEYMGRNDFQVKIR	TTCGAGCAACAAGTTGCACTGCGTCCGGCGGCCAATGCAGTCAGCGACGACAGCGGTCAGGTGTTGAGCTACGCCGAACTCAACCGCCAGTCCAATCAGCTGGCCCATCGGCTGATCGAACTGGGTGTCGGCCCTGACGCAAGGGTTGCCGTATGCCTGCGCCGCAGTCCGGAGATGGTGATTGCCCTGCTGGCGATCCTCAAGGCTGGTGGCGCCTACGTGCCGATTGATCCGGATCTACCGGTTTCTCGCCGCGAATACATGCTCGATGACAGCGCACCACTGGCGGTGTTGAGCAGCGAAGCGCTGCTGGCGACCCTGCCCGCGCTGAGCGTGCCGGTATTGGTGCTGGATCGCGATGCCCATGATTTCCCCGACACCAATCCGCACGTGTCGGGC…	[]	['Structure-based inference', 'Mass spectrometry', 'Homology']	['pubmed:25784695']
BGC0001416	NRP	Pseudomonas sp. In5	nunapeptin	nrpspksdomains_AL066_08465_AMP-binding.2	2,4-diaminobutyric acid	dab	FEAQAEAQPDAIAVVFDGEQMSYAELNRQANQMAHHLIGLGIRPDDRVAICVERGAEMLVGLLAILKSGAGYVPLDPAYPAERLAYMLSDSTPSVLLTQRALQANLPTLDIPVVLLDKAERIADGYDDNPVILSLGVRHLAYVIYTSGSTGTPKGVMIEHRGLVNYTLDAIRLFGLTNADTVLQQNTLNFDLSVEEIFPALIAGATLAPSRSIFGTSQDDIRPTFLHLTAAHWHTLAAEWHYNPKLAQDQLRDVRLINVTGDALSTQKLQMWEQIRPAHTKLVNTYGPTEATVSCTASYVTFEALNSNASIGTPMANTRIYLLDAHLKPVPFGVTGEIYIGGDGVARGYLNLDKITAERFLPDPFSNLASARLYKTGDLARYRPDGGLEYQGRNDFQVK…	TTTGAAGCCCAGGCCGAAGCGCAACCGGATGCCATCGCGGTGGTGTTTGACGGCGAGCAGATGAGCTACGCCGAACTCAATCGTCAGGCCAACCAGATGGCGCATCACTTGATCGGTTTGGGCATTCGTCCGGATGATCGGGTGGCGATTTGCGTCGAACGTGGCGCGGAAATGCTGGTTGGTTTGCTGGCGATCCTGAAATCCGGTGCGGGTTATGTGCCGCTGGATCCGGCTTATCCGGCTGAACGATTGGCCTACATGCTGAGCGACAGCACCCCTTCGGTGTTGCTGACCCAACGTGCATTACAAGCGAATTTGCCAACTCTGGACATTCCGGTGGTCCTGCTCGATAAAGCCGAACGCATCGCCGACGGTTACGACGACAACCCGGTGATCCTG…	[]	['Structure-based inference', 'Mass spectrometry', 'Homology']	['pubmed:25784695']
BGC0001416	NRP	Pseudomonas sp. In5	nunapeptin	nrpspksdomains_AL066_08465_AMP-binding.3	glycine	gly	FEAQVRVRPEAIALVYEDQQLTYAQLNRRANQLARRLIALGLQPDQRVALCAERSPEMLIGLLGVLKAGGAYLPLDLALPVERTAFMLSESTPLVVLTQQALAAQLQVGETPLLLLDERESLDAGNDPAFDPNPEISGLTPAHLAYVMFTSGSTGKPKGVMVEHRNVVNLLRTMAEKVGANANDRVLALTTLGFDIAGLELFLPLICGARVVLASRDQAHDGRLLAEVIAHNEVTLAQATPASWRMLLDSGWSGDTSLTALCGGEALPADLARRLAGQVKRLFNVYGPTETTIWSSAIQVSAQDTLGNQVSIGRPIANTQFYVLNPQGNPVPVGVSGEMYIGGTGVARGYLNRPDLSAERFLTDPFSTVPNARMYRTGDLGRWLADGSLEFLGRNDFQV…	TTTGAAGCCCAGGTGCGCGTGCGGCCCGAGGCGATTGCGCTGGTCTACGAGGATCAGCAACTCACCTACGCCCAGCTCAACCGCCGCGCCAACCAGCTCGCACGGCGCCTGATCGCCCTCGGCCTGCAACCGGACCAGCGTGTTGCCCTGTGTGCCGAGCGCAGCCCGGAAATGCTGATCGGCCTGCTCGGCGTGCTCAAGGCCGGCGGCGCCTACTTGCCCCTCGACCTGGCCCTGCCGGTTGAGCGCACGGCGTTCATGCTCAGCGAAAGTACTCCGCTGGTGGTGCTCACCCAACAGGCTTTGGCGGCGCAATTGCAGGTCGGCGAAACGCCGCTGTTGTTGCTCGATGAACGCGAATCCCTGGACGCCGGCAACGACCCGGCCTTCGACCCGAAC…	[]	['Structure-based inference', 'Mass spectrometry', 'Homology']	['pubmed:25784695']
BGC0001416	NRP	Pseudomonas sp. In5	nunapeptin	nrpspksdomains_AL066_08465_AMP-binding.4	homoserine	ser	FETQAARTPEAIALVSAGETLTYAELNARANGVAHRLIKLGVKPDDTVGLCARRSADMVIGLLGILKAGAAYVPLDPQYPAERLAHMLADSAPRVLVRQQGLELAVPVDLATIEIGSDEITRNPQIAGLTVSHLAYVIYTSGSTGLPKGVMVEHRGLRNLLDWYLKDLAFTAKDAVLLASSYNFDLTQKNILAPLMVGGVLHLAEEPFDPAAIVKQIAQSGITHINMSPSAFHALVDADKTHALASLKRVVLGGEPIPLAMLEKLQAPRPTVINSYGPTECSDVVAWQTVDADLDVYREQAIPIGKPIRNMQLHVLDSLGHLVPIGVRGEIHIGGTGVARGYLNQPELSAERFISDPFAATPEARLYKTGDIGRWLADGTLEYLGRDDHQVKIR	TTCGAAACCCAGGCTGCGCGCACGCCGGAAGCGATTGCCCTGGTCAGTGCCGGCGAAACCCTGACTTACGCCGAGTTGAACGCACGGGCCAACGGCGTCGCCCATCGCCTGATCAAACTTGGGGTCAAACCCGACGACACCGTGGGCCTGTGCGCCCGCCGCAGTGCCGACATGGTGATCGGCTTGCTGGGTATCCTGAAGGCCGGCGCCGCCTACGTGCCGCTCGATCCGCAATACCCGGCGGAACGTCTGGCACACATGCTCGCCGACAGCGCACCGCGTGTATTGGTCCGCCAACAAGGGCTTGAGTTGGCGGTGCCGGTTGACCTCGCCACCATCGAGATCGGCAGCGACGAAATCACCCGCAACCCGCAGATCGCCGGTTTGACCGTGAGCCAT…	[]	['Structure-based inference', 'Mass spectrometry', 'Homology']	['pubmed:25784695']
BGC0001437	NRP	Pseudomonas fluorescens	obafluorin	nrpspksdomains_obaI_AMP-binding.1	2,3-dihydroxybenzoic acid	bz	FERAVHATPDAIALTFNGEHLTYQALNQRANRLAHLIQDQTGQTSPQPVALLLARSVQTFVCILGVLKAGAHYVPLDPDAPAERITTILEDTCPTLVICDQSSQALVSGSDVKVMVIDTPSCMDAVQQQSIDNLQSGPRANDLAYIIYTSGSTGKPKGVCITHHNVVRLFENTHHWFDYRSSDVWTACHGYIFDASVWEMWGAFAHGGRLVLVPVDTTRDPEKLLELVVQEQVTVFGQIPSAFYRFMEAQADQPALAARLNLRYQCFGGEALDLSRLKPWFEHYGHSRTRLLNLYGITETTINATYQFVTLEQVQTNQGSLIGTVYDDLDIKVLDDALRPVPVGGYGEMYVRGAGLARGYLNRQDLDATRFVADPFGAPGERMYRSGDVAALQEGGVLE…	TTTGAGCGCGCCGTGCACGCGACTCCGGACGCCATCGCCCTGACCTTCAACGGCGAACACCTCACCTATCAGGCGCTGAACCAACGCGCCAACCGTCTTGCCCATTTGATCCAGGACCAGACCGGGCAAACCAGCCCCCAACCGGTCGCGCTGCTATTGGCGCGCTCGGTCCAAACCTTTGTGTGCATCCTTGGCGTGTTGAAGGCCGGCGCGCATTACGTGCCACTGGACCCGGATGCACCCGCCGAACGCATCACCACCATCCTTGAGGACACCTGCCCGACACTGGTGATCTGCGACCAGTCCAGCCAGGCGCTGGTCTCGGGCAGCGACGTGAAGGTCATGGTGATCGACACCCCATCGTGCATGGATGCGGTGCAACAGCAATCGATCGACAAC…	OC1=C(O)C(=CC=C1)C(=O)N[C@H]1[C@@H](CC2=CC=C(C=C2)N(=O)=O)OC1=O	['Structure-based inference']	['pubmed:28504677', 'doi:10.1038/ncomms15935']
BGC0001437	NRP	Pseudomonas fluorescens	obafluorin	nrpspksdomains_obaI_AMP-binding.2	(2S,3R)-2-amino-3-hydroxy-4-(4-nitrophenyl)butanoic acid	(2s,3r)-2-amino-3-hydroxy-4-(5-nitrophenyl)butanoic acid	RHALLAPQRVAVTDGDRNLSYSQLDSNADRIADGFATLGVKAGDRVVVQLPNSMEFIETIFGLFRLGAIPVFALPSDRLNEITHIFEISGAIAYVIKDQALGFDYRRIATELTQQIASIKQVIVVGDAEGFVPFANLYGRTAAWPQRSSREPALITLSGGSTALPKLILRRHDDYLYSFKASARICQLDSDSVYLCVLPAGHNFTLSSPGFLGVLYAGGRVVMTSDPSGSGAFALIERERVTLTSVVPSLAQAWLHSSRDHDLSSLQLLQVGGARLSDDVAERLATSFDCQLQQVYGMSEGLVCYTAVGDTEEHVLHTQGRPISSGDEILIVDENDEPVANGVAGQLLVRGPYTIRGYLNAPEHNARAFTPDGFYRTGDVVVFRDDGYLVVTGRIKDQV…	CGCCACGCACTGCTCGCCCCGCAGCGGGTAGCCGTTACCGACGGCGATCGGAACCTGAGCTATTCGCAACTGGACAGCAATGCCGACCGCATTGCCGACGGCTTCGCCACCCTCGGTGTGAAGGCCGGTGACCGAGTGGTTGTGCAATTGCCGAACTCCATGGAGTTCATCGAAACCATCTTCGGCCTGTTTCGCCTTGGCGCGATTCCGGTGTTTGCGTTGCCCTCGGATCGCCTGAACGAAATCACGCACATCTTTGAGATTTCAGGTGCGATCGCCTACGTGATCAAGGACCAGGCGCTGGGTTTCGATTACCGGCGTATCGCAACCGAGCTCACGCAGCAGATTGCGTCGATCAAGCAGGTCATCGTGGTCGGTGATGCCGAAGGGTTCGTCCCG…	OC1=C(O)C(=CC=C1)C(=O)N[C@H]1[C@@H](CC2=CC=C(C=C2)N(=O)=O)OC1=O	[]	['pubmed:28504677', 'doi:10.1038/ncomms15935']
BGC0001509	NRP	Pseudomonas fluorescens	anikasin	nrpspksdomains_A8O26_RS13965_AMP-binding.1	leucine	leu	FEAQVAERPEALAAVFADAQLTYAELNRHANALAHHLIERGVKPDDRVAIVARRGLDTLIGLVAILKAGAGYVPVDPAHPAERLNYLLGDSAPVVVLTQTDLRERLPALDVPVIDLDRCTWPLTCTLDPNVPGLTPSHLAYVIYTSGSTGLPKGVMVEHHTLNNLVDWHCTAFDLCAGRHTSSLAGFGFDAMAWEVWPALCAGATLHLAPTHNGNEDIDALLAWWCAQPLDVSFLPTPVAEYAFSQNLEHPTLRTLLIGGDRLRQFNRNQHFDVINNYGPTEATVVATSARVDSGDALHIGKPVSNATVYLLDEQQRPVPMGVAGELYVGGAGVARGYLNRPEMTAERFLRDPFSRLPNARMYRTGDLARWREDGTLEYLGRNDDQVKIR	TTCGAAGCTCAGGTTGCCGAACGGCCGGAAGCGCTGGCAGCAGTGTTTGCCGACGCGCAATTGACCTACGCCGAGTTGAACCGCCACGCCAATGCCCTGGCACATCACCTGATCGAGCGCGGCGTAAAACCCGACGACCGCGTGGCCATCGTCGCCCGCCGGGGGCTCGATACGCTGATCGGGCTCGTCGCTATTCTCAAGGCCGGCGCCGGTTACGTGCCGGTCGATCCGGCACACCCGGCCGAGCGCTTGAACTATCTGCTCGGTGACAGCGCGCCGGTGGTCGTCCTCACCCAAACCGATCTGCGTGAGCGCTTGCCGGCGCTGGACGTGCCGGTGATCGACCTCGACCGCTGCACCTGGCCACTGACCTGCACGCTCGACCCGAACGTGCCGGGG…	[]	['Structure-based inference', 'Mass spectrometry']	['pubmed:28846366']
BGC0001509	NRP	Pseudomonas fluorescens	anikasin	nrpspksdomains_A8O26_RS13965_AMP-binding.2	serine	ser	FEAQVARTPQAPALLAGEQRLTYAELNAKANQLARHLRGVGVQADSRVAICVERGLDMVVGLLAILKAGGGYVPLDPAYPLERLGYMLDDSAPLAVLVQGSTRGLLGEVTLPVIDLDQPHWQSLPSDPLPTAELTPQHMAYVIYTSGSTGQPKGVINEHTAVVNRLLWMQDAYPLTAADTVLQKTPFSFDVSVWEFFWPLMTGARLVMAQPGGHKDPLYLSEIIEQERITTLHFVPSMLDVFLAHGDTQRCSQLRQVMCSGEALPGSLVRRFKRQLPGTALHNLYGPTEAAVDVTAWNCAGPLEQTPDNTPIGKPIANTRMYILDGQQQPVPQGVVGELYIGGVQVARGYLNRPELSAQRFLDDPFQANGRIYRTGDVARYLADGNIEYLGRNDDQVKIR	TTCGAGGCGCAAGTGGCGCGCACGCCACAGGCGCCGGCGTTGCTCGCCGGTGAACAGCGCTTGACCTATGCCGAGCTGAACGCCAAGGCCAACCAACTGGCGCGACACCTGCGTGGCGTGGGCGTGCAGGCGGATTCGCGGGTGGCGATTTGCGTCGAGCGCGGTCTGGACATGGTTGTCGGTCTGCTGGCGATCCTCAAGGCTGGCGGTGGTTATGTGCCGCTGGACCCGGCATATCCGCTGGAACGTCTTGGCTACATGCTGGACGACAGCGCGCCGCTGGCGGTGTTGGTGCAAGGTTCAACTCGCGGGCTGCTCGGTGAAGTCACCCTGCCTGTGATCGATCTCGATCAACCGCACTGGCAGTCGCTGCCGAGCGACCCTCTGCCGACCGCCGAG…	[]	['Structure-based inference', 'Mass spectrometry']	['pubmed:28846366']
BGC0001509	NRP	Pseudomonas fluorescens	anikasin	nrpspksdomains_A8O26_RS13965_AMP-binding.3	leucine	leu	FEQQVAERPHAPAVIFAGARLSYAELDHQANALAHHLIEAGVRPDDRVAIVARRGLDTLVGLVAILKAGAGYVPVDPAHPAERLNYLLEDSAPVAVLTQSTLRARLPELQVPLIDLDLHQWPNSRIDTPSVPALTPQHLAYVIYTSGSTGQPKGVMVEHRTLSNLLDWHCAAFDLHAGSHTSSLAGFGFDAMAWEVWPALCVGATLHLAPAHDGNEDIDALLDWWRAQPLDVSFLPTPVAEYAFSQEQAHPTLKTLLIGGDRLRQFNRTQSFKVINNYGPTEATVVATSGLIEAGQVLHIGKPVSNASVYLLDEQQRPVPLGVMGELYVGGAGVARGYLNRPLMTAERFLHDPFSRLPNARMYRTGDLARWREDGTLEYLGRNDDQVKIR	TTCGAGCAGCAAGTGGCTGAGCGACCGCACGCGCCGGCGGTGATTTTTGCTGGCGCGCGCCTGAGTTATGCCGAACTCGACCACCAGGCCAACGCCTTGGCGCATCACCTGATCGAAGCGGGTGTGCGGCCTGATGATCGCGTGGCCATCGTTGCCCGTCGCGGGCTCGATACCCTGGTCGGATTGGTGGCGATTCTCAAGGCGGGCGCCGGTTATGTGCCGGTGGACCCGGCGCATCCAGCGGAGCGCCTGAACTATCTGCTGGAGGACAGCGCGCCGGTTGCCGTGTTGACCCAAAGCACACTGCGCGCACGTCTGCCCGAGCTGCAAGTGCCGCTGATCGACCTTGATCTGCACCAGTGGCCAAACAGCAGAATCGACACGCCGTCAGTGCCCGCG…	[]	['Structure-based inference', 'Mass spectrometry']	['pubmed:28846366']
BGC0001509	NRP	Pseudomonas fluorescens	anikasin	nrpspksdomains_A8O26_RS13965_AMP-binding.4	isoleucine	ile	FQQQAAAHPKAVAAVHGAQSLSYFELNAQANRLAHHLIGQGVQPGDHVAILLPRSLELLVAQLAIAKCAAAYVPLDIHAPSERQAFMVEDCRAAALLTLSDEVIDYAATRIDLDRLKLSDQPTHNPNLAQSSESLAYIMYTSGSTGTPKGVMVPHRGIGRLVLNNGYADFNAQDRVVFASNPAFDASTMDIWGPLLNGGRVVIIDHQTLLDPQAFGRELSASGATILFVTTALFNQYVQLIPQALKGLRILLCGGERGDPEAFRTLLAEAPQLRIVHCYGPTETTTYATTFEVQAVAENAESVPIGGPISNTQVYVLDAHQQPLPMGVTGELYIGGQGVALGYLNRADLTAEKFLRDPFSDKPGALLYRTGDLARWLAPGQLDCVGRNDDQVKIR	TTCCAGCAACAAGCGGCGGCGCATCCAAAGGCTGTGGCGGCGGTGCATGGCGCACAATCGCTGAGTTATTTCGAACTGAACGCGCAGGCCAATCGCCTGGCTCATCACCTGATCGGCCAAGGCGTGCAACCAGGGGATCACGTGGCGATCCTGTTGCCACGCTCGCTGGAACTGCTGGTAGCGCAACTGGCGATTGCCAAGTGCGCGGCGGCCTATGTGCCACTGGACATCCATGCGCCGAGCGAACGTCAGGCGTTCATGGTCGAGGACTGTCGGGCGGCCGCGCTGCTGACCCTGAGCGACGAAGTCATCGATTACGCCGCAACGCGTATCGATCTGGACAGGCTGAAACTCAGTGATCAACCCACGCATAACCCTAACCTTGCGCAGTCTTCCGAG…	[]	['Structure-based inference', 'Mass spectrometry']	['pubmed:28846366']
BGC0001509	NRP	Pseudomonas fluorescens	anikasin	nrpspksdomains_A8O26_RS13965_AMP-binding.5	aspartic acid	asp	FEAQVRAKPEAIAVQSEAGRLSYRELNARANQLAHHLREQGVEPDSRVAICVERGLDLVVGLLGILKAGGAYVPLDPGYPAERLTYMLKDSAPVAVLVQAATRSLFDAPAMTFIDLDQGHWQQLPADDPQVPGLSAANLAYMIYTSGSTGLPKGVMIEHRSACNMVHWGSQISAPTEHGALLQKAPFSFDSSVWEIFWPLCSGLRLVLARPDGNRDSAYVVQAIREHHVTVVKFVPALLQDFIEQADVSQCTSLTDVLNGGGELSAALARQVRDRLPWVRLHNVYGPTETTVDSTGWTLEPDQPVPHNAVPIGQGLSNTRLYVLDAYDQPVPQGVSGQLHIGGVGVARGYHGLPQMQAERFIDSPFVAGDRLYRTGDLARYNNDGDLEFLGRNDFQIKLR	TTTGAAGCGCAGGTACGGGCTAAACCCGAGGCCATCGCCGTGCAGTCCGAAGCTGGGCGGCTTTCCTATCGGGAACTCAATGCACGGGCCAATCAACTGGCCCATCACTTGCGCGAACAGGGCGTGGAGCCGGATTCACGCGTGGCGATTTGCGTCGAGCGCGGGCTGGATCTGGTGGTCGGTCTGCTCGGCATTCTAAAGGCCGGCGGGGCGTATGTGCCGCTGGATCCGGGATATCCGGCGGAACGTCTGACCTACATGCTCAAGGACAGCGCGCCGGTCGCGGTGCTGGTGCAAGCGGCGACGCGTTCGCTGTTCGACGCGCCTGCAATGACCTTCATCGACCTCGATCAAGGTCATTGGCAACAACTGCCCGCTGACGATCCGCAGGTGCCGGGC…	[]	['Structure-based inference', 'Mass spectrometry']	['pubmed:28846366']
BGC0001509	NRP	Pseudomonas fluorescens	anikasin	nrpspksdomains_A8O26_RS13970_AMP-binding.1	threonine	thr	FEAHAQARPDATALIFEGQTLSYGELNRRANQVAHHLLALNIRPDDRVAICVERGPQMIIGLLGVLKAGAGYVPIDPAYPLDRISFTLQDSAPAAVLMQAATRDRVADLEVPQIDLDSAHLKAELDSNPQIPELTSAHLAYVIYTSGSTGLPKGVMVEHRNVARLFSATHDWFQFNQQDIWALFHSFAFDFSVWEIWGALAFGGQLLLVPQAVSRSPDDCYALLCQTGVTVLNQTPSAFRQLIAAQGRSPLQHSLREVIFGGEALEPGLLKPWYARVGNAGTRLVNMYGITETTVHVTYRPLQAADASLVGVSPIGVRIPDLQLYVLDAQREPVPVGVIGELYVGGAGVARGYLNREALTAERFINDPFGDNAEARLYKTGDLARWAVDGSLEYLGRND…	TTCGAAGCCCATGCGCAGGCCCGACCGGATGCCACGGCGTTGATTTTCGAAGGGCAGACGCTCAGCTACGGCGAGCTCAATCGTCGTGCCAACCAGGTCGCCCATCACTTGCTGGCATTGAACATCCGCCCGGATGACCGCGTGGCGATCTGCGTCGAACGTGGCCCGCAAATGATCATCGGCCTGCTCGGCGTACTCAAGGCCGGCGCCGGTTACGTGCCGATCGACCCGGCTTATCCGCTGGACAGAATCAGCTTTACCTTGCAGGACAGCGCCCCGGCAGCCGTGCTCATGCAAGCCGCGACGCGCGATCGCGTGGCTGATCTCGAGGTGCCGCAGATCGATCTCGACAGCGCCCACCTCAAGGCCGAACTCGACAGCAATCCGCAGATCCCCGAA…	[]	['Structure-based inference', 'Mass spectrometry']	['pubmed:28846366']
BGC0001509	NRP	Pseudomonas fluorescens	anikasin	nrpspksdomains_A8O26_RS13970_AMP-binding.2	leucine	leu	FEAQALAHPDALAVAQGEQRLSYRELNQRANRLAHHLIGLGVQTDDRVALCLRRGPDMLVGMLAILKAGAGYVPIDPDYPQERIAYLLQDSDPIAVLAQASTRDLLGVVPVIDLDASDWQHLPDHNPQRPKLTPASLAYVIYTSGSTGQPKGVMVEHRTLENLVHWHAEAFDLHAGSHTASVAGCGFDAMAWEVWPALCVGATVHLPPSSIGNEHLDELLEWWRAQPLQVSFLPTPVAEYAFSRGLGHPTLRTLLIGGDKLRQFPRDQTFAVINNYGPTEATVVATSGRIEPGRVLHIGRPIANARIYLLDRLQQPVPTGVQGELYVGGVGVARGYLNRPELTAAHFLEDPFSDEPHARMYRTGDLARWLADGNIEYLGRNDDQVKLR	TTTGAAGCGCAAGCCCTGGCGCATCCCGATGCGCTGGCGGTGGCGCAGGGCGAGCAACGGCTCAGCTACCGCGAACTGAATCAGCGCGCCAATCGTCTCGCCCATCACCTGATTGGCCTCGGCGTGCAAACCGACGACCGTGTCGCGCTGTGCCTGCGTCGCGGCCCGGACATGCTTGTTGGAATGCTGGCGATTCTCAAGGCCGGCGCCGGTTATGTGCCGATTGATCCTGATTATCCGCAAGAGCGCATCGCCTACCTGTTGCAGGACAGCGACCCGATTGCGGTGCTGGCACAGGCGTCGACGCGCGACCTGCTCGGCGTTGTCCCGGTGATTGATCTGGACGCCAGCGACTGGCAGCACTTGCCTGACCACAATCCGCAACGGCCGAAGCTGACG…	[]	['Structure-based inference', 'Mass spectrometry']	['pubmed:28846366']
BGC0001509	NRP	Pseudomonas fluorescens	anikasin	nrpspksdomains_A8O26_RS13970_AMP-binding.3	leucine	leu	EAQAEQQPDSLAVVQGMQQLTYAQLNQRANRLAHHLLGLGVQPDDRIAVCLRRSPDMLVALLAILKAGAGYVPVDPAYPAERIAYLLQDSAPMAVLAQASTADLLGAVPLIDLDNPTWQQLSDSNPQLPTLTPAHLAYVIYTSGSTGQPKGVMVEHATLENLVHWHCEAFDLRAGSHTSSVAGFGFDAMAWEVWPALCVGATLHLPPESVSNEHLDELLQWWRAQPLQVSFLPTPVAEYAFTRDLGHPTLRTLLIGGDKLRQLPREQTFAVINNYGPTEATVVATSGAVEAGQVLHIGRPMANAKIYLLDEQQRPVPVGVAGELYVGGAGVARGYLHRPELTAERFLDDPFSDEPQARMYRTGDLARWLADGSVEYLGRNDDQVKLR	GAGGCTCAGGCCGAGCAGCAGCCGGATTCACTGGCAGTGGTTCAGGGCATGCAGCAACTGACCTACGCGCAACTCAATCAGCGTGCCAATCGCCTGGCCCATCACTTGCTCGGGCTCGGCGTGCAGCCCGATGACCGCATCGCCGTGTGCCTGCGCCGCAGCCCGGACATGCTCGTCGCGTTGCTGGCGATCCTCAAGGCCGGCGCCGGTTATGTGCCGGTCGACCCGGCGTACCCGGCGGAACGCATCGCCTATCTGTTGCAGGACAGCGCGCCGATGGCGGTGCTGGCACAGGCTTCGACCGCTGATTTGCTCGGCGCAGTGCCGCTGATTGATCTGGACAATCCCACCTGGCAACAGCTGTCCGACAGCAATCCGCAACTGCCGACGCTGACCCCG…	[]	['Structure-based inference', 'Mass spectrometry']	['pubmed:28846366']
BGC0001509	NRP	Pseudomonas fluorescens	anikasin	nrpspksdomains_A8O26_RS13970_AMP-binding.4	serine	ser	FEAQVRRTPQAVAVVIGEQALSYAQLNERANRLARHLISLGVQVDSRVAICVERSLEMVIGLLAINKAGAGYVPLDPAYPPERLAYMLEDSAPAVVLVHAATDELLGDVSAAVVDLDHNTWQSLSADNPQIPALTPQHTAYVIYTSGSTGQPKGVVNEHAGVVNRLLWMQDAYRLSAADSVLQKTPFSFDVSVWEFFWPLMTGARLVMAQPGGHKDPHYLSEVIEREHITTLHFVPSMLDVFLANSDTARCDSVRQVMCSGEALPGSLVRRFKLQLPGSALHNLYGPTEAAVDVTAWDCAGSIEQTPDNTPIGKPIANTRMYILNAQQQPVPQGVVGELYIAGVQVARGYLNRPELSAERFLDDPFQPSGRMYRTGDVARYRADGNIEYLGRNDDQVKIR	TTCGAAGCGCAGGTGCGGCGTACGCCACAGGCTGTGGCCGTCGTCATCGGCGAACAGGCATTGAGCTACGCGCAGTTGAACGAACGCGCCAACCGCTTGGCCCGGCACTTGATCAGCCTCGGTGTGCAAGTGGATTCACGGGTGGCGATCTGTGTCGAACGCAGCCTGGAGATGGTCATCGGCTTGCTGGCGATCAACAAGGCCGGCGCCGGTTATGTGCCGCTGGACCCGGCCTATCCGCCGGAGCGTCTCGCCTACATGCTTGAAGACAGCGCGCCGGCCGTGGTGCTGGTGCACGCGGCGACCGACGAATTGCTGGGAGATGTCTCGGCAGCGGTCGTCGACCTCGACCACAACACCTGGCAATCCCTGTCCGCCGACAATCCACAAATCCCGGCG…	[]	['Structure-based inference', 'Mass spectrometry']	['pubmed:28846366']
BGC0001509	NRP	Pseudomonas fluorescens	anikasin	nrpspksdomains_A8O26_RS13975_AMP-binding.1	leucine	leu	FESRVAEQPDAVVATYQGRSLSYAELNRQANALAHHLLGLGVRPDDRVAIVARRGLETLVGLLAILKAGAAYVPIDPAHPPERLSYLLSDSAPVALLTQSDVRERLPAIALPVIELDRREWALDSVTDPEVAGLNPGNLAYVIYTSGSTGLPKGVMVEHRTLANLVDWHCAAFGLGPGQHTSSLAGFGFDAMAWEVWPALCAGATLHFSPATEGSEDIDALLAWWRAQPLDVSFLPTPIAEYAFSKQLDHPTLRTLLIGGDRLRQFNRAQGFAVVNNYGPTEATVVATSGLITPGQALHIGKPVSNATAYLLDEQQRPVPIGIIGELYVGGAGVARGYLNRPQLTAERFLDDPFNTQPGARMYRTGDLARWRADGNLEYIGRNDDQVKVR	TTCGAGTCGCGGGTGGCCGAACAGCCGGACGCCGTGGTCGCGACTTATCAGGGGAGGTCGCTGAGTTACGCCGAGCTCAACCGGCAAGCCAATGCGCTGGCCCATCATCTGCTGGGCCTCGGCGTACGGCCCGATGACCGGGTGGCGATTGTCGCCCGCAGAGGCCTGGAAACCCTGGTCGGGCTGCTGGCGATTCTCAAGGCTGGCGCCGCTTATGTGCCGATTGACCCGGCGCATCCACCCGAACGCCTGAGTTATCTGCTCAGCGACAGCGCTCCGGTGGCGCTGCTGACGCAAAGCGATGTGCGCGAGCGTTTGCCTGCCATAGCGCTGCCAGTGATTGAGCTTGATCGGCGCGAGTGGGCGCTCGACAGCGTCACCGATCCCGAGGTTGCCGGG…	[]	['Structure-based inference', 'Mass spectrometry']	['pubmed:28846366']
BGC0001509	NRP	Pseudomonas fluorescens	anikasin	nrpspksdomains_A8O26_RS13975_AMP-binding.2	aspartic acid	asp	FEQQVLRKPDAIAVQFAEQRLTYRELNEQANRLAHHLRGLGVQADSRVAICVERGPQLVIGLLGILKAGGAYVPLDPDYPLQRLNYMLQDSAPVALLVHAATRDLLGEAGVPLIDLDLGAWQDQPHDNPQVPGLGAANLAYMIYTSGSTGTPKGVMIEHRSACNMVHWGSQLAPPTEHGALLQKAPYSFDSSVWEIFWPLCSGMRLVLARADGNRDSAYVTQVIREQNITVVKFVPALLQQFIEQDDVSQCTSLTDVLNGGGELTVALARQVRERLPWVRLHNVYGPTETTVDSSGWTLEPGEPVPPTWVPIGKALSNTRLYVLDASDQPVPLGVSGHLHIGGVGVARGYLGLPQLQAERFIDSPFVAGDRLYRTGDLVRYGADGNLEFLGRNDFQVKLR	TTCGAACAGCAAGTGCTGCGCAAACCGGATGCCATCGCCGTGCAATTTGCCGAGCAGCGCCTGACCTATCGCGAGTTGAACGAGCAAGCCAACCGCCTGGCCCATCATCTGCGCGGGCTGGGCGTGCAAGCGGATTCGCGGGTAGCGATCTGCGTCGAGCGCGGGCCGCAATTAGTGATCGGTCTGCTGGGCATTCTCAAGGCTGGCGGTGCGTATGTGCCGCTCGATCCGGATTATCCGCTGCAACGGCTGAATTACATGTTGCAGGACAGCGCGCCGGTCGCGCTGCTGGTGCATGCCGCGACGCGCGATCTGCTCGGCGAAGCCGGCGTGCCGCTGATCGATCTCGACCTCGGCGCCTGGCAGGACCAGCCTCACGACAATCCGCAGGTGCCGGGC…	[]	['Structure-based inference', 'Mass spectrometry']	['pubmed:28846366']
BGC0001629	NRP	Pseudomonas sp. QS1027	jessenipeptin	nrpspksdomains_jesA_AMP-binding.1	threonine	thr	FEARAAERPEAVALVYQGESLSYGELNARANQVAHRLLALGVRPDDRVAICVERGPAMIIGLLGILKSGAGYVPLDPAYPRERLAYTLGDSAPVALLSQHSVQEALPAVKVPVINLDDADLRDESVRNPQVAVSATHLAYVIYTSGSTGVPKGVMVEHCNVARLFSATDAWFGFNEKDVWALFHSFAFDFSVWEIWGALLHGGRLLIVPQLVSRSPEDCYELLCSAGVTVLNQTPSAFRQLIAAQGESGQPHSLRQVIFGGEALDTAMLKPWYARDLNAATQLVNMYGITETTVHVTYYPLQAEDAQRVGVSPIGRGIPDLRLYLLDGYGQPLPPGVVGELYVGGAGVARGYLNREELNASRFLDDPFVSTPGARMYRSGDLGRWLADGSLEYLGRNDE…	TTCGAAGCCCGCGCCGCCGAGCGGCCGGAGGCCGTGGCGTTGGTGTACCAGGGTGAAAGCCTGAGCTACGGCGAACTCAACGCCCGCGCCAACCAGGTTGCCCATCGGCTGTTGGCCCTCGGTGTACGCCCGGATGACCGGGTCGCCATCTGTGTCGAACGTGGTCCGGCAATGATCATCGGCCTGCTGGGGATCCTCAAGTCCGGCGCCGGGTATGTGCCGCTGGACCCGGCTTACCCGCGCGAACGCCTGGCCTACACCCTTGGCGACAGCGCCCCGGTGGCGTTGCTCAGCCAGCATTCGGTACAGGAAGCCCTGCCGGCGGTGAAGGTACCGGTTATCAATCTCGACGATGCGGATCTGCGGGACGAGTCCGTGCGCAATCCGCAGGTCGCGGTG…	CCCCCCC[C@H](CC(=O)N/C(=C\C)/C(=O)N1CCC[C@@H]1C(=O)N[C@H]([C@H](C)CC)C(=O)N[C@H](C(C)C)C(=O)N[C@H](C)C(=O)N[C@H](C)C(=O)N[C@@H](C)C(=O)N[C@H](C(C)C)C(=O)N[C@H](CO)C(=O)N[C@H](C)C(=O)N[C@H](C(C)C)C(=O)N[C@H](C)C(=O)N[C@H](CC(C)C)C(=O)N/C(=C\C)/C(=O)N[C@@H]2[C@H](OC(=O)[C@@H](NC(=O)[C@H](NC(=O)[C@@H](NC(=O)[C@@H](NC2=O)C)CCN)CO)CC3=CC=CC=C3)C)O	[]	['doi:10.1073/pnas.1721790115']
BGC0001629	NRP	Pseudomonas sp. QS1027	jessenipeptin	nrpspksdomains_jesA_AMP-binding.2	proline	pro	FEAHVAAQPDAVAVTYEGQRLSYTELNQWANQIAHRLMAEGIGADDRVAICVERSLEMIAGLVGILKAGAGYVPLDPSYPAERLAYMLEDSAPKVLLTQRGLRERFPQALMPVLLLDAEARIESGIDAAPGHNPQIEGLNAQHLAYLIYTSGSTGQPKGVAMPHGPLVNLMHWQIAQTFEHGRPGQRTLQFAALGFDVAFQEVFSTLCAGGELSLIHGDIRLDFRRLFQHICEQRIERLYMPCIALQALAEAMVAEAAQPECVLQDVITAGEQLRITEPMRRFFERLDDARLHNHYGPTESHVVTALTLRGDPQAWPTLPSIGQPVANTRVYLLDEQFRPVPVGVAGELYIGGACVARGYLNRDELTAERFIRDPFAATEGARLYKTGDLGRWQADGQI…	TTCGAGGCTCACGTGGCGGCCCAGCCTGACGCGGTGGCCGTCACCTATGAAGGCCAGCGCCTGAGCTACACCGAACTGAACCAGTGGGCCAACCAGATTGCCCATCGGCTGATGGCCGAGGGCATCGGCGCCGACGACCGGGTGGCGATCTGTGTGGAGCGCAGCCTGGAAATGATCGCCGGCCTGGTGGGCATTCTCAAGGCCGGCGCCGGTTATGTGCCGCTGGACCCGTCCTATCCCGCCGAACGCCTGGCCTACATGCTGGAGGACAGCGCACCCAAGGTGCTGCTGACCCAGCGCGGCTTGCGCGAACGTTTCCCCCAGGCGCTGATGCCGGTGCTGCTGCTGGACGCCGAAGCCCGGATCGAGAGTGGTATCGACGCCGCGCCTGGGCACAAT…	CCCCCCC[C@H](CC(=O)N/C(=C\C)/C(=O)N1CCC[C@@H]1C(=O)N[C@H]([C@H](C)CC)C(=O)N[C@H](C(C)C)C(=O)N[C@H](C)C(=O)N[C@H](C)C(=O)N[C@@H](C)C(=O)N[C@H](C(C)C)C(=O)N[C@H](CO)C(=O)N[C@H](C)C(=O)N[C@H](C(C)C)C(=O)N[C@H](C)C(=O)N[C@H](CC(C)C)C(=O)N/C(=C\C)/C(=O)N[C@@H]2[C@H](OC(=O)[C@@H](NC(=O)[C@H](NC(=O)[C@@H](NC(=O)[C@@H](NC2=O)C)CCN)CO)CC3=CC=CC=C3)C)O	[]	['doi:10.1073/pnas.1721790115']
BGC0001629	NRP	Pseudomonas sp. QS1027	jessenipeptin	nrpspksdomains_jesA_AMP-binding.3	isoleucine	ile	FEDQVRLRPQATAAVHHGQALSYAQLNSRANQLAAHLFGLGVQPGARVAILLERSLDLLVSQLAILKCAAVYVPLDTKAPLERQQFMLEDSQAVVLLTQSGFTLASGPAARVDLDAVALEVLPTDNRQLPQSSESPAYIMYTSGSTGVPKGVVVPHRAITRLVINNGYADFNDQDRIAFISNPAFDASTMDVWGALLNGGQVLVVDHETLLEPARFGELLISAKATVLFVTTAVFNQYVQLIPEAIKGLRILLCGGERSDPASFRRLLALAPQLRLVHCYGPTETTTYATTYHVTAVAEDAESVPIGRPIGNTQVYVLDARQQLLPLGVSGEICIGGKGVAHGYLNRADLTAEKFIADPFSSEPGALLYRTGDLGRWLADGLLECLGRNDDQVKIR	TTCGAGGACCAGGTCCGCCTGCGACCACAGGCGACGGCAGCCGTGCACCATGGCCAGGCCCTGAGCTACGCGCAATTGAACAGCCGGGCCAATCAGCTTGCCGCCCATCTGTTCGGTCTCGGCGTACAGCCGGGAGCGCGGGTGGCGATCCTGCTGGAACGCTCCCTGGACCTGCTGGTCAGCCAGTTGGCGATTCTCAAGTGCGCGGCGGTCTATGTGCCGCTGGACACCAAGGCGCCGCTGGAGCGCCAGCAATTCATGCTTGAAGACAGCCAGGCCGTGGTCCTGCTGACCCAAAGCGGTTTCACGCTGGCCAGCGGCCCGGCGGCCCGGGTCGATCTCGACGCCGTGGCGCTGGAAGTCTTGCCGACGGATAACCGCCAATTACCACAGTCGAGC…	CCCCCCC[C@H](CC(=O)N/C(=C\C)/C(=O)N1CCC[C@@H]1C(=O)N[C@H]([C@H](C)CC)C(=O)N[C@H](C(C)C)C(=O)N[C@H](C)C(=O)N[C@H](C)C(=O)N[C@@H](C)C(=O)N[C@H](C(C)C)C(=O)N[C@H](CO)C(=O)N[C@H](C)C(=O)N[C@H](C(C)C)C(=O)N[C@H](C)C(=O)N[C@H](CC(C)C)C(=O)N/C(=C\C)/C(=O)N[C@@H]2[C@H](OC(=O)[C@@H](NC(=O)[C@H](NC(=O)[C@@H](NC(=O)[C@@H](NC2=O)C)CCN)CO)CC3=CC=CC=C3)C)O	[]	['doi:10.1073/pnas.1721790115']
BGC0001629	NRP	Pseudomonas sp. QS1027	jessenipeptin	nrpspksdomains_jesA_AMP-binding.4	valine	val	FEAQVQRTPEAPAVAHDAESLSYRELNRQANRLAAELLDLGVQPGDSVALLLPRSIDLVVSQLAVLKCAAVYVPLDINAPRERQTFMVQDSQAVLVLTYSAETLGPGTRRLDLDVRPASEEPADNLDRPATAESVAYIMYTSGSTGTPKGVLVPHRAIARLVIDNGYADFNGQDRVAFASNPAFDASTLDVWAPLLNGGCVVVVEHSVLLSQDEFRALLLAQSVSVLWLTAGLFHQYADGLMEVFARLRYLIVGGDVLDPAVIARVLAQGAPQHLLNGYGPTEATTFSATYEITSVGSGGIPIGRPIGNSQVYVLDARRQPVAVGVPGELYIGGQGVAKGYLNRAELSATQFVADPFSAREGALLYRTGDLGRWKADGNLEYLGRNDGQVKIR	TTCGAGGCCCAGGTACAGCGCACGCCTGAAGCACCGGCGGTGGCCCATGACGCGGAGAGCCTGAGCTACCGCGAGTTGAACCGGCAGGCCAACCGCCTGGCGGCGGAACTGCTGGACCTCGGCGTGCAGCCGGGGGATAGCGTGGCGCTGTTGCTGCCGCGCTCCATCGACCTGGTGGTCAGTCAGCTGGCGGTGCTCAAGTGCGCGGCGGTCTACGTGCCGCTGGACATCAATGCGCCACGGGAACGTCAGACCTTCATGGTGCAGGACAGCCAGGCCGTGCTGGTGCTGACCTACAGCGCTGAAACCCTGGGCCCGGGCACTCGACGTCTCGACCTTGACGTTCGGCCTGCCAGTGAGGAACCGGCGGACAACCTGGATCGACCGGCAACCGCCGAG…	CCCCCCC[C@H](CC(=O)N/C(=C\C)/C(=O)N1CCC[C@@H]1C(=O)N[C@H]([C@H](C)CC)C(=O)N[C@H](C(C)C)C(=O)N[C@H](C)C(=O)N[C@H](C)C(=O)N[C@@H](C)C(=O)N[C@H](C(C)C)C(=O)N[C@H](CO)C(=O)N[C@H](C)C(=O)N[C@H](C(C)C)C(=O)N[C@H](C)C(=O)N[C@H](CC(C)C)C(=O)N/C(=C\C)/C(=O)N[C@@H]2[C@H](OC(=O)[C@@H](NC(=O)[C@H](NC(=O)[C@@H](NC(=O)[C@@H](NC2=O)C)CCN)CO)CC3=CC=CC=C3)C)O	[]	['doi:10.1073/pnas.1721790115']
BGC0001629	NRP	Pseudomonas sp. QS1027	jessenipeptin	nrpspksdomains_jesA_AMP-binding.5	alanine	ala	FEEQVARTPEALAVVHGEQRLSYRELNELANRLAHALRKQGVQPDSRVGICVERGVEMVVGLLAILKAGGGYVPLDPAYPVERIAYMLQDSAPAAVLAQSATQDLLAGVSVPVINLDLGTWQGESAQNPEVPGLTSAHLAYLIYTSGSTGLPKGVMIEHRNTVNFLTWAHAAFDGSALNKTLFSTSLNFDLAVYECFAPLTSGGSIDVVKNVLELQQGEHDIGLINTVPSALKALLEVDGLPESVHTVNVAGEALKRSLVESLFEKTGVQRLCNLYGPSETTTYSSWVAMDREDGFAPHIGKPVGNTQFYLLDEQQQPVPLGVPGEIYIGGAGVARGYLNRDDLTAERFLNDPFSREVSARMYRTGDLGRYLPDGNIEYLGRNDDQVKIR	TTCGAGGAGCAGGTGGCGCGTACGCCGGAGGCCCTGGCGGTGGTTCATGGCGAACAGCGCCTGAGTTATCGCGAACTCAATGAACTGGCCAACCGCCTGGCCCATGCCTTGCGCAAGCAGGGTGTGCAGCCGGATTCGCGGGTGGGGATCTGTGTCGAGCGCGGGGTGGAGATGGTCGTCGGCTTGCTGGCGATCCTCAAGGCGGGCGGCGGCTATGTGCCGCTGGACCCGGCTTATCCGGTAGAGCGGATTGCCTATATGTTGCAGGACAGTGCTCCGGCGGCGGTCTTGGCACAGTCAGCTACCCAGGATCTGTTGGCGGGCGTCTCGGTCCCCGTGATCAATCTCGATCTGGGCACCTGGCAGGGCGAATCCGCCCAGAATCCAGAGGTGCCGGGA…	CCCCCCC[C@H](CC(=O)N/C(=C\C)/C(=O)N1CCC[C@@H]1C(=O)N[C@H]([C@H](C)CC)C(=O)N[C@H](C(C)C)C(=O)N[C@H](C)C(=O)N[C@H](C)C(=O)N[C@@H](C)C(=O)N[C@H](C(C)C)C(=O)N[C@H](CO)C(=O)N[C@H](C)C(=O)N[C@H](C(C)C)C(=O)N[C@H](C)C(=O)N[C@H](CC(C)C)C(=O)N/C(=C\C)/C(=O)N[C@@H]2[C@H](OC(=O)[C@@H](NC(=O)[C@H](NC(=O)[C@@H](NC(=O)[C@@H](NC2=O)C)CCN)CO)CC3=CC=CC=C3)C)O	[]	['doi:10.1073/pnas.1721790115']
BGC0001629	NRP	Pseudomonas sp. QS1027	jessenipeptin	nrpspksdomains_jesB_AMP-binding.1	alanine	ala	FEAQVERTPQALAVVHGEQRLSYRELNEQANRLAHALRKQGVQPDSRVGICVERGAEIVVGLLAILKAGGGYVPLDPAYPAERIAYMLQDSAPAAVLAQAATQNLLAGVTVPVINLDQDTWQDESVQNPEVPGLNSAHLAYLIYTSGSTGLPKGVMIEHRNTVNFLTWAHTAFGDEALNKTLFSTSLNFDLAVYECFAPLTSGGSIDVVKNVLELQHGEHDIGLINTVPSALKALLEVDGLPESVHTVNVAGEALKRSLVESLFEKTGVQRLCNLYGPSETTTYSSWVAMDREDGFAPHIGKPVGNTQFYLLNEQQQPVPLGVPGEIYIGGAGVARGYLNRDDLTAERFLKDPFSQDASARMYRTGDLGRYLPDGNIEYLGRNDDQVKIR	TTCGAAGCGCAGGTCGAGCGTACGCCGCAGGCCCTGGCGGTGGTGCATGGCGAACAGCGCCTGAGCTATCGCGAGCTTAACGAGCAGGCCAACCGTTTGGCCCATGCCTTGCGCAAGCAGGGTGTGCAGCCGGATTCGCGGGTGGGGATCTGTGTCGAGCGTGGAGCGGAGATTGTCGTCGGCTTGCTGGCGATTCTCAAGGCGGGCGGCGGTTATGTGCCGTTGGACCCCGCTTATCCGGCGGAACGTATTGCCTACATGTTGCAGGACAGCGCTCCGGCAGCGGTCCTGGCACAAGCGGCTACCCAGAATCTATTGGCGGGCGTTACGGTGCCCGTGATCAATCTCGATCAGGACACCTGGCAGGACGAATCCGTCCAGAATCCGGAGGTGCCGGGG…	CCCCCCC[C@H](CC(=O)N/C(=C\C)/C(=O)N1CCC[C@@H]1C(=O)N[C@H]([C@H](C)CC)C(=O)N[C@H](C(C)C)C(=O)N[C@H](C)C(=O)N[C@H](C)C(=O)N[C@@H](C)C(=O)N[C@H](C(C)C)C(=O)N[C@H](CO)C(=O)N[C@H](C)C(=O)N[C@H](C(C)C)C(=O)N[C@H](C)C(=O)N[C@H](CC(C)C)C(=O)N/C(=C\C)/C(=O)N[C@@H]2[C@H](OC(=O)[C@@H](NC(=O)[C@H](NC(=O)[C@@H](NC(=O)[C@@H](NC2=O)C)CCN)CO)CC3=CC=CC=C3)C)O	[]	['doi:10.1073/pnas.1721790115']
BGC0001629	NRP	Pseudomonas sp. QS1027	jessenipeptin	nrpspksdomains_jesB_AMP-binding.2	alanine	ala	FEAQVQRTPDVLAVVHGGRRLTYRELNEQANRLAHTLRKQGVQPDSRVGICVDRGAEMVVGLLAILKAGGGYVPLDPAYPAERIAYMLQDSAPAAVLAQAATRDLLAGISVPVINLDQGTWQDESVQNPEVPGLTSAHLAYLIYTSGSTGLPKGVMIEHRNTVNFLTWAHAAFGGPALEKTLFSTSLNFDLAVYECFAPLTSGGSIEVVKNVLELQQGEHDIGLINTVPSALKALLEVDGLPESVHTVNVAGEALKRSLVESLFEKTGVQRLCNLYGPSETTTYSSWVSMDREDGFAPHIGKPVGNTQFYLLDEQQQPVPLGVPGEIYIGGAGVARGYLNREDLTAERFLNDPFSREASARMYRTGDLGRYLPDGNIEYLGRNDDQVKIR	TTCGAAGCGCAGGTGCAGCGTACGCCGGACGTCTTGGCCGTGGTGCATGGCGGGCGCCGCCTGACTTATCGCGAGCTTAACGAGCAAGCCAACCGTCTGGCGCATACCTTGCGTAAACAGGGTGTGCAGCCGGATTCACGGGTGGGGATCTGTGTCGATCGCGGGGCCGAGATGGTCGTCGGCTTGCTGGCGATTCTCAAGGCGGGCGGCGGTTATGTACCGCTGGACCCGGCTTACCCGGCGGAGCGGATTGCCTATATGTTGCAGGACAGCGCCCCGGCGGCGGTCCTGGCACAAGCGGCTACCCGTGATTTGCTGGCGGGTATTTCGGTGCCGGTTATCAATCTCGACCAGGGCACCTGGCAGGACGAGTCCGTCCAGAATCCTGAGGTGCCGGGG…	CCCCCCC[C@H](CC(=O)N/C(=C\C)/C(=O)N1CCC[C@@H]1C(=O)N[C@H]([C@H](C)CC)C(=O)N[C@H](C(C)C)C(=O)N[C@H](C)C(=O)N[C@H](C)C(=O)N[C@@H](C)C(=O)N[C@H](C(C)C)C(=O)N[C@H](CO)C(=O)N[C@H](C)C(=O)N[C@H](C(C)C)C(=O)N[C@H](C)C(=O)N[C@H](CC(C)C)C(=O)N/C(=C\C)/C(=O)N[C@@H]2[C@H](OC(=O)[C@@H](NC(=O)[C@H](NC(=O)[C@@H](NC(=O)[C@@H](NC2=O)C)CCN)CO)CC3=CC=CC=C3)C)O	[]	['doi:10.1073/pnas.1721790115']
BGC0001629	NRP	Pseudomonas sp. QS1027	jessenipeptin	nrpspksdomains_jesB_AMP-binding.3	valine	val	FEAQVRARPEACAAIHDGVSLTYAGLNTRANRLARHLRGLGVQPGDSVAILLERSHELLVSQLAALKCGAVYVPLDINAPVERQGFMIEDSQARVLLTRREVPLVSNVQRVDLDHLSLERLDGDDLAIPQSSESVAYIMYTSGSTGTPKGVLVPHRAISRLVINNGYADFNARDRVAFASNPAFDASTLDVWAPLLNGGCVVVIGQADLLSPENFQRLLLEQSVTVLWMTAGLFHQYAAGLGDAFSRLRYLIVGGDVLDPAVIARVLANAAPEHLLNGYGPTEATTFSATYEITRADSGSLPIGRPVGNGRLYVLDAQAQPVPLGVIGELYIGGLGVAKGYLNRDELTREKFVADPFDSDPQARLYRTGDLARWRADGNLEYLGRNDDQVKIR	TTCGAAGCCCAGGTGCGGGCGCGTCCCGAGGCTTGCGCGGCGATCCACGATGGCGTGTCGCTGACCTACGCCGGACTCAACACCCGGGCCAACCGCCTGGCCCGGCATCTGCGCGGTCTCGGTGTGCAACCGGGCGACAGCGTGGCGATCCTGCTGGAGCGCTCCCATGAGCTGCTGGTCAGCCAACTGGCGGCGCTCAAGTGCGGCGCGGTCTATGTCCCGCTGGATATCAACGCCCCGGTCGAGCGCCAGGGTTTCATGATCGAGGACAGCCAGGCCCGGGTCCTGCTGACTCGTCGCGAGGTGCCGCTGGTCAGCAACGTGCAACGTGTGGACCTCGATCATCTGAGTCTGGAACGCCTGGACGGCGATGACCTGGCGATACCGCAGTCCAGCGAA…	CCCCCCC[C@H](CC(=O)N/C(=C\C)/C(=O)N1CCC[C@@H]1C(=O)N[C@H]([C@H](C)CC)C(=O)N[C@H](C(C)C)C(=O)N[C@H](C)C(=O)N[C@H](C)C(=O)N[C@@H](C)C(=O)N[C@H](C(C)C)C(=O)N[C@H](CO)C(=O)N[C@H](C)C(=O)N[C@H](C(C)C)C(=O)N[C@H](C)C(=O)N[C@H](CC(C)C)C(=O)N/C(=C\C)/C(=O)N[C@@H]2[C@H](OC(=O)[C@@H](NC(=O)[C@H](NC(=O)[C@@H](NC(=O)[C@@H](NC2=O)C)CCN)CO)CC3=CC=CC=C3)C)O	[]	['doi:10.1073/pnas.1721790115']
BGC0001629	NRP	Pseudomonas sp. QS1027	jessenipeptin	nrpspksdomains_jesB_AMP-binding.4	serine	ser	FEARVAASGDSVAVVDEKGSLTYDALNRQANRIAHRLIGLGIGPDDRVAICVDRSLEMVAGLMGILKAGAAYVPLDPDYPIDRLTYMLENCAPAVVLTQEALRAVLPASSVPVLLLDPEHAEREGFLAQSDSNPLRAEVRPEHLAYVIYTSGSTGQPKGVMNEHRGVVNRLLWMQDEYGLNASDSVLQKTPFSFDVSVWEFFWPLFNGARLVMARPGGHRDPGYLREVIREQNITTLHFVPSMLDLFLAHGEAGDSGLLRVMCSGEALPGHLVRRFKQQLPEVGLFNLYGPTEAAVDVTAWDCAGPLEETPDNTPIGKPVANTRIYLLDASRQPVPLGVAGELYIGGVQVARGYLNRPELSAERFLDDPFTTGRMYRTGDLGRYLPDGTVEYLGRNDDQ…	TTTGAAGCTCGGGTCGCTGCCAGTGGTGATTCGGTAGCGGTCGTCGACGAGAAGGGTAGCCTGACCTATGACGCACTCAACCGTCAGGCCAACCGTATCGCCCATCGTCTGATCGGCCTGGGCATTGGTCCGGATGATCGGGTGGCAATCTGCGTCGACCGTAGCCTGGAAATGGTGGCGGGGCTGATGGGGATTCTCAAGGCCGGTGCCGCTTATGTGCCGCTGGACCCGGATTATCCGATTGATCGCCTGACCTACATGCTGGAGAACTGTGCTCCTGCGGTGGTCCTCACCCAAGAGGCTTTGCGTGCGGTGCTTCCAGCAAGCAGCGTACCGGTGCTGTTGCTCGATCCTGAGCATGCCGAGCGTGAAGGTTTCCTCGCACAATCGGATAGCAAT…	CCCCCCC[C@H](CC(=O)N/C(=C\C)/C(=O)N1CCC[C@@H]1C(=O)N[C@H]([C@H](C)CC)C(=O)N[C@H](C(C)C)C(=O)N[C@H](C)C(=O)N[C@H](C)C(=O)N[C@@H](C)C(=O)N[C@H](C(C)C)C(=O)N[C@H](CO)C(=O)N[C@H](C)C(=O)N[C@H](C(C)C)C(=O)N[C@H](C)C(=O)N[C@H](CC(C)C)C(=O)N/C(=C\C)/C(=O)N[C@@H]2[C@H](OC(=O)[C@@H](NC(=O)[C@H](NC(=O)[C@@H](NC(=O)[C@@H](NC2=O)C)CCN)CO)CC3=CC=CC=C3)C)O	[]	['doi:10.1073/pnas.1721790115']
BGC0001629	NRP	Pseudomonas sp. QS1027	jessenipeptin	nrpspksdomains_jesB_AMP-binding.5	alanine	ala	FEEQVQRTPEAVAVVHGGKRLSYRELNEQANRLAHVLRKQGVLPDSRVGICVERGAEMVVGLLGILKAGGGYVPLDPAYPAERIAYMLQDSAPAAVLAQSATQALLAGVSAPVINLDQGTWQDESVQNPEVPGLTSAHLAYLIYTSGSTGLPKGVMIEHRNTVNFLTWAHTAFGAESLNKTLFSTSLNFDLAVYECFAPLTSGGSIDVVKNVLELQHGEHDIGLINTVPSALKALLEVGGVPKSVHTVNVAGEALKRSLVEALFEKTGVQRLCNLYGPSETTTYSSWVAMDREEGFAPHIGKPVGNTQFYLLDEQQQPVPLGVPGEIYIGGAGVARGYLNRDDLTAERFLQDPFATTPNARMYRTGDLGRYLPDGNIEYLGRNDDQVKIR	TTTGAAGAGCAGGTGCAGCGCACGCCAGAGGCCGTGGCGGTGGTGCATGGCGGGAAGCGCCTGAGTTATCGCGAGCTTAACGAGCAGGCCAACCGTTTGGCCCATGTCTTGCGCAAGCAGGGCGTCTTGCCGGATTCGCGGGTCGGGATTTGCGTTGAGCGCGGGGCGGAGATGGTTGTCGGCTTGCTGGGAATTCTCAAGGCGGGCGGTGGTTATGTACCGTTGGACCCGGCTTACCCGGCGGAGCGGATTGCCTATATGTTGCAGGACAGCGCGCCGGCGGCGGTCTTGGCCCAGTCGGCGACCCAGGCGTTGTTGGCGGGCGTTTCGGCACCGGTCATCAACCTTGATCAGGGCACCTGGCAGGACGAGTCCGTCCAGAATCCAGAAGTGCCGGGG…	CCCCCCC[C@H](CC(=O)N/C(=C\C)/C(=O)N1CCC[C@@H]1C(=O)N[C@H]([C@H](C)CC)C(=O)N[C@H](C(C)C)C(=O)N[C@H](C)C(=O)N[C@H](C)C(=O)N[C@@H](C)C(=O)N[C@H](C(C)C)C(=O)N[C@H](CO)C(=O)N[C@H](C)C(=O)N[C@H](C(C)C)C(=O)N[C@H](C)C(=O)N[C@H](CC(C)C)C(=O)N/C(=C\C)/C(=O)N[C@@H]2[C@H](OC(=O)[C@@H](NC(=O)[C@H](NC(=O)[C@@H](NC(=O)[C@@H](NC2=O)C)CCN)CO)CC3=CC=CC=C3)C)O	[]	['doi:10.1073/pnas.1721790115']
BGC0001629	NRP	Pseudomonas sp. QS1027	jessenipeptin	nrpspksdomains_jesC_AMP-binding.1	valine	val	FELQVAVRPDAVAAVQDDQSLTYQQLNSRANGLARHLIGLGVQPGERVALLLARSFDLLAGQLAIIKCGAAYVPLDINAPAERQAFMLHDSAARQVLTLSSSVVPEGLQRVDLDTLVLEADVPNPTLAGSSESVAYIMYTSGSTGTPKGVLVPHRAVSRLVINNGYADFNAGDRVAFASNPSFDASTLDVWAPLLNGGCVVVVEQSVLLSLDEFRALLLAQSVSVLWMTAGLFHQYAGGLMEAFGRLRYLIVGGDVLDPAVIARVLEEGAPQHLLNGYGPTEATTFSTTYEITSVGNGGIPIGRPIGNSQVYVLDALRQPVAVGVAGELYIGGQGVAKGYLNRPELTATQFVADPFNSEAGALLYRTGDLARWTADGVVEYLGRNDDQVKIR	TTCGAACTGCAAGTGGCGGTGCGGCCCGACGCAGTGGCTGCCGTCCAGGACGACCAGAGCCTGACCTACCAGCAACTCAACAGCCGGGCCAATGGCCTGGCCCGCCACCTGATCGGCCTCGGCGTACAGCCGGGCGAGCGGGTGGCGTTGCTGCTGGCGCGTTCCTTCGACCTGCTGGCCGGCCAACTGGCGATTATCAAATGCGGCGCGGCCTATGTGCCGCTGGATATCAATGCACCGGCGGAACGCCAGGCCTTCATGTTGCACGACAGCGCGGCGCGGCAGGTATTGACCCTGAGCAGCAGCGTGGTGCCCGAAGGTCTCCAGCGGGTCGATCTGGACACGCTGGTACTGGAAGCCGATGTCCCGAACCCGACACTGGCCGGGTCCTCCGAGTCG…	CCCCCCC[C@H](CC(=O)N/C(=C\C)/C(=O)N1CCC[C@@H]1C(=O)N[C@H]([C@H](C)CC)C(=O)N[C@H](C(C)C)C(=O)N[C@H](C)C(=O)N[C@H](C)C(=O)N[C@@H](C)C(=O)N[C@H](C(C)C)C(=O)N[C@H](CO)C(=O)N[C@H](C)C(=O)N[C@H](C(C)C)C(=O)N[C@H](C)C(=O)N[C@H](CC(C)C)C(=O)N/C(=C\C)/C(=O)N[C@@H]2[C@H](OC(=O)[C@@H](NC(=O)[C@H](NC(=O)[C@@H](NC(=O)[C@@H](NC2=O)C)CCN)CO)CC3=CC=CC=C3)C)O	[]	['doi:10.1073/pnas.1721790115']
BGC0001629	NRP	Pseudomonas sp. QS1027	jessenipeptin	nrpspksdomains_jesC_AMP-binding.2	alanine	ala	FEAQVERTPQAXAVVHGEQRLSYRELNEQANRLAHALRKXGVQPDSRVGICVERGAEIVVGLLAILKAGGGYVPLDPAYPAERIAYMLQDSAPAAVLAQAATQNLLAGVTVPVINLDQDTWQDESVQNPEVPGLNSAHLAYLIYTSGSTGLPKGVMIEHRNTVNFLTWAHTAFGDEALNKTLFSTSLNFDLAVYECFAPLTSGGSIDVVKNVLELQHGEHDIGLINTVPSALKALLEVDGLPESVHTVNVAGEALKRSLVESLFEKTGVQRLCNLYGPSETTTYSSWVSMDREDGFAPHIGKPVGNTQFYLLDEQQQPVPLGVPGEIYIGGAGVARGYLNRDDLTAERFLQDPFATTPNARMYRTGDLGRYLADGNIEYLGRNDDQVKIR	TTCGAAGCGCAGGTCGAGCGTACGCCGCAGGCCCNGGCGGTGGTGCATGGCGAACAGCGCCTGAGCTATCGCGAGCTTAACGAGCAGGCCAACCGTTTGGCCCATGCCTTGCGCAAGCNGGGTGTGCAGCCGGATTCGCGGGTGGGGATCTGTGTCGAGCGTGGAGCGGAGATTGTCGTCGGCTTGCTGGCGATTCTCAAGGCGGGCGGCGGTTATGTGCCGTTGGACCCCGCTTATCCGGCGGAACGTATTGCCTACATGTTGCAGGACAGCGCTCCGGCAGCGGTCCTGGCACAAGCGGCCACCCAGAATCTGTTGGCGGGCGTTACGGTGCCCGTGATCAATCTCGATCAGGACACCTGGCAGGACGAATCCGTCCAGAATCCGGAGGTGCCGGGG…	CCCCCCC[C@H](CC(=O)N/C(=C\C)/C(=O)N1CCC[C@@H]1C(=O)N[C@H]([C@H](C)CC)C(=O)N[C@H](C(C)C)C(=O)N[C@H](C)C(=O)N[C@H](C)C(=O)N[C@@H](C)C(=O)N[C@H](C(C)C)C(=O)N[C@H](CO)C(=O)N[C@H](C)C(=O)N[C@H](C(C)C)C(=O)N[C@H](C)C(=O)N[C@H](CC(C)C)C(=O)N/C(=C\C)/C(=O)N[C@@H]2[C@H](OC(=O)[C@@H](NC(=O)[C@H](NC(=O)[C@@H](NC(=O)[C@@H](NC2=O)C)CCN)CO)CC3=CC=CC=C3)C)O	[]	['doi:10.1073/pnas.1721790115']
BGC0001629	NRP	Pseudomonas sp. QS1027	jessenipeptin	nrpspksdomains_jesC_AMP-binding.3	leucine	leu	FEAQVLATPDALAVVHEGQALSYAELNRQANQLAHHLRGLGVQPDDRVAISARRSLDMLVGLVAILKSGAGYVPIDPSHPAERLAYLLRDSAPRVLLTQAELLGRLPVQDVPVLLLDGESRRAAGVDAQPQSNPDIATPSSLAYVIYTSGSTGEPKGVMVEHRQLSNLVSWHCQAFALEAGSQTSSVAGFGFDAMAWEVWPALCVGATLHLPPATAGSEDVDGLLAWWLAQPLDVSFLPTPIAEYAFSQSLQHPTLRTLLIGGDRLRQFPQGQRFALINNYGPTETTVVATSGLIDEHAATLHIGKPVANTRVYLLDEQLRPVPLGVPGELYIGGASVARGYLNRAALTAERFLKDPFSSDPEARMYKTGDLARWLADGNLDYLGRNDDQVKIR	TTCGAAGCCCAGGTTCTGGCAACCCCGGACGCGCTCGCGGTGGTCCATGAAGGCCAAGCCCTGAGCTATGCCGAGCTGAATCGCCAGGCCAACCAGCTGGCCCATCATCTGCGCGGCCTTGGCGTACAGCCTGATGACCGGGTCGCTATCAGCGCGCGGCGCAGCCTCGACATGCTGGTCGGCTTGGTGGCGATCCTCAAGTCCGGCGCCGGTTATGTGCCGATCGATCCGTCTCATCCGGCGGAACGCCTGGCCTACCTGCTGCGCGACAGCGCCCCACGGGTACTGCTGACCCAGGCCGAGCTGCTCGGACGCCTGCCGGTGCAGGACGTGCCAGTGCTGCTGCTCGACGGCGAATCCCGCCGCGCCGCGGGTGTCGACGCGCAACCGCAGAGCAAC…	CCCCCCC[C@H](CC(=O)N/C(=C\C)/C(=O)N1CCC[C@@H]1C(=O)N[C@H]([C@H](C)CC)C(=O)N[C@H](C(C)C)C(=O)N[C@H](C)C(=O)N[C@H](C)C(=O)N[C@@H](C)C(=O)N[C@H](C(C)C)C(=O)N[C@H](CO)C(=O)N[C@H](C)C(=O)N[C@H](C(C)C)C(=O)N[C@H](C)C(=O)N[C@H](CC(C)C)C(=O)N/C(=C\C)/C(=O)N[C@@H]2[C@H](OC(=O)[C@@H](NC(=O)[C@H](NC(=O)[C@@H](NC(=O)[C@@H](NC2=O)C)CCN)CO)CC3=CC=CC=C3)C)O	[]	['doi:10.1073/pnas.1721790115']
BGC0001629	NRP	Pseudomonas sp. QS1027	jessenipeptin	nrpspksdomains_jesC_AMP-binding.4	threonine	thr	FEARAEDRPEAVALVYQDESLSYGELNARANQVAHRLLALGVRPDDRVAICVERGPAMIVGLLGILKSGAGYVPLDPAYPRERLAYTLGDSAPVALLSQHSVQEALPAVQVPVINLDDADLQDESVRNPQVPGLTAAHLAYVIYTSGSTGLPKGVMVEHRNVARLFSATEEWFGFNEQDVWALFHSFAFDFSVWEIWGALLHGGRLLIVPQLVSRSPEDCYNLLCSAGVTVLNQTPSAFRQLIAAQGENGQPHSLRQVIFGGEALDTALLKPWYARDLNAATQLVNMYGITETTVHVTYYPLQAEDAQRLGASPIGKRIPDLQLYVLDARREPVPVGVVGELYVGGAGVARGYLNRAELSAERFLDNPFSREANARMYRTGDLGRWLADGSLEYLGRND…	TTCGAAGCCCGTGCCGAAGATCGGCCGGAGGCCGTGGCGCTGGTGTACCAGGATGAAAGCCTGAGCTACGGCGAACTCAACGCCCGTGCCAACCAGGTTGCTCATCGTCTGCTGGCCCTGGGCGTTCGCCCTGATGATCGGGTGGCGATCTGTGTCGAGCGCGGCCCGGCGATGATCGTCGGTCTGCTGGGTATCCTCAAGTCCGGCGCCGGTTATGTCCCGCTGGACCCGGCCTATCCCCGTGAACGTCTGGCCTACACCCTTGGCGACAGCGCTCCGGTGGCATTGCTCAGCCAGCACTCGGTGCAGGAAGCCTTGCCAGCGGTGCAGGTGCCCGTTATCAATCTCGACGATGCGGATCTGCAGGACGAGTCCGTGCGCAATCCGCAGGTGCCGGGG…	CCCCCCC[C@H](CC(=O)N/C(=C\C)/C(=O)N1CCC[C@@H]1C(=O)N[C@H]([C@H](C)CC)C(=O)N[C@H](C(C)C)C(=O)N[C@H](C)C(=O)N[C@H](C)C(=O)N[C@@H](C)C(=O)N[C@H](C(C)C)C(=O)N[C@H](CO)C(=O)N[C@H](C)C(=O)N[C@H](C(C)C)C(=O)N[C@H](C)C(=O)N[C@H](CC(C)C)C(=O)N/C(=C\C)/C(=O)N[C@@H]2[C@H](OC(=O)[C@@H](NC(=O)[C@H](NC(=O)[C@@H](NC(=O)[C@@H](NC2=O)C)CCN)CO)CC3=CC=CC=C3)C)O	[]	['doi:10.1073/pnas.1721790115']
BGC0001629	NRP	Pseudomonas sp. QS1027	jessenipeptin	nrpspksdomains_jesC_AMP-binding.5	threonine	thr	FEAWVVAQPEAVALQYEGRTLTYGELNARANQVAHHLLGLGVRPDDRVAICVERGLEMIVGLLGILKAGAGYVPIDPAYPAERIAYQLQDSAPVAVLADAAGLALLDTFDGPRVDLRSPALQAQSSSNPRVSGLSPHHLAYVIYTSGSTGLPKGVMVEHRNVARLFSATQSWFEFNEQDVWALFHSFAFDFSVWEIWGALLHGGRLLVVPQLVSRSPEDCYALLCNAGVTVLNQTPSAFRQLLNAQGESDLRHSLRQVIFGGEALETGILKPWYARVANAGTQLVNMYGITETTVHVTYCPLVAADAQRAGVSPIGVRIPDLQLYVLDSRREPVPVGVVGELYVGGAGVARGYLNRVELTAERFLANPFSKDPQARLYKTGDLGRWMADGSLDYLGRND…	TTCGAAGCCTGGGTCGTGGCGCAACCGGAAGCCGTGGCCCTGCAATATGAAGGGCGCACGCTGACCTACGGCGAGCTGAATGCCCGTGCCAACCAGGTCGCCCATCACTTGCTGGGACTGGGCGTGCGTCCGGATGACCGGGTGGCGATCTGTGTCGAGCGCGGCCTGGAGATGATTGTCGGGCTGCTGGGGATCCTCAAGGCGGGCGCCGGCTACGTGCCGATCGACCCGGCCTATCCGGCCGAGCGTATCGCCTACCAGTTGCAGGACAGTGCTCCCGTGGCGGTATTGGCCGATGCCGCCGGCCTGGCGCTGCTGGACACCTTCGACGGCCCACGGGTCGATCTGCGCAGCCCGGCGCTGCAGGCCCAGTCGAGCAGCAATCCACGGGTCAGCGGG…	CCCCCCC[C@H](CC(=O)N/C(=C\C)/C(=O)N1CCC[C@@H]1C(=O)N[C@H]([C@H](C)CC)C(=O)N[C@H](C(C)C)C(=O)N[C@H](C)C(=O)N[C@H](C)C(=O)N[C@@H](C)C(=O)N[C@H](C(C)C)C(=O)N[C@H](CO)C(=O)N[C@H](C)C(=O)N[C@H](C(C)C)C(=O)N[C@H](C)C(=O)N[C@H](CC(C)C)C(=O)N/C(=C\C)/C(=O)N[C@@H]2[C@H](OC(=O)[C@@H](NC(=O)[C@H](NC(=O)[C@@H](NC(=O)[C@@H](NC2=O)C)CCN)CO)CC3=CC=CC=C3)C)O	[]	['doi:10.1073/pnas.1721790115']
BGC0001629	NRP	Pseudomonas sp. QS1027	jessenipeptin	nrpspksdomains_jesC_AMP-binding.6	alanine	ala	FEAQVQCTPDAQAVVHGEQRLTYRELNEQANRLAHTLRKQGVQPDSRVGICVERGVEMVVGLLAILKAGGGYVPLDPAYPVERIAYMLQDSAPAAVLVQSATQDLLAGVSVPLINLDQDTWQDESVQNPEVPGLNSAHLAYLIYTSGSTGLPKGVMIEHRNTVNFLAWAHAAFDGSALSKTLFSTSLNFDLAVYECFAPLTSGGSIEVVKNVLELQQGEHDIGLINTVPSALKALLEVGGVPESVHTINVAGEALKRSLVETLFEQTGVQRLCNLYGPSETTTYSSWVAMDREDGFAPHIGKPVGNTRFYLLDEHQQPVPLGVPGEIYIGGAGVARGYLNRDDLTAERFLKDPFSQDASARMYRTGDLGRYLPDGNIEYLGRNDDQVKIR	TTCGAAGCGCAAGTGCAGTGCACGCCGGACGCCCAGGCAGTGGTGCATGGCGAGCAGCGCCTGACTTATCGCGAGCTTAACGAGCAGGCCAACCGCCTGGCGCATACCCTGCGTAAACAGGGTGTGCAGCCGGATTCGCGGGTGGGGATCTGCGTTGAGCGTGGGGTCGAGATGGTCGTCGGCTTGCTGGCTATTCTCAAGGCGGGTGGCGGTTATGTGCCGCTGGACCCTGCTTACCCGGTAGAGCGGATTGCCTATATGTTGCAGGACAGTGCTCCGGCAGCGGTGCTGGTGCAGTCGGCTACCCAGGATCTGTTGGCGGGCGTTTCGGTGCCGCTGATCAATCTCGATCAGGACACCTGGCAGGACGAATCCGTCCAGAATCCGGAGGTGCCGGGG…	CCCCCCC[C@H](CC(=O)N/C(=C\C)/C(=O)N1CCC[C@@H]1C(=O)N[C@H]([C@H](C)CC)C(=O)N[C@H](C(C)C)C(=O)N[C@H](C)C(=O)N[C@H](C)C(=O)N[C@@H](C)C(=O)N[C@H](C(C)C)C(=O)N[C@H](CO)C(=O)N[C@H](C)C(=O)N[C@H](C(C)C)C(=O)N[C@H](C)C(=O)N[C@H](CC(C)C)C(=O)N/C(=C\C)/C(=O)N[C@@H]2[C@H](OC(=O)[C@@H](NC(=O)[C@H](NC(=O)[C@@H](NC(=O)[C@@H](NC2=O)C)CCN)CO)CC3=CC=CC=C3)C)O	[]	['doi:10.1073/pnas.1721790115']
BGC0001629	NRP	Pseudomonas sp. QS1027	jessenipeptin	nrpspksdomains_jesC_AMP-binding.7	2,4-Diaminobutyric acid	dab	FEEQVRAQPEAIAVAFQTQRLSYAELNRQANRLAHHLIGLGIGPDDRVAICVERGVEMMVGLLGVLKAGAAYVPLDPAYPAERLAYMIEDSKPSALLAQRALQSHLPALAMPLVLLDDDQRQGFAERDDNPVVKNLGVRNLAYVIYTSGSTGNPKGVMIEHRGLVNYSVDAARLFGLTATDTVLQQNTLNFDLSVEEIFPALLAGATLAPSREIFGSEGSENHGIRPTFLHMTAAHWHTLAAEWHSQPQVAAQRLEGVRLINVTGDALSAQKLKLWDEVRPAHTRLINTYGPTEATVSCTAAYVSHDAVAGSEGSGNATIGKPMANTRIYLLDAHQQPVPYGVAGEIFIGGDGVARGYLNLEQVNAERFLVDPFSTSPDARMYKTGDLARYMADGRIEY…	TTCGAAGAGCAGGTCCGGGCACAACCCGAGGCCATCGCGGTGGCTTTCCAGACACAGCGCCTGAGTTATGCCGAGCTGAACCGCCAGGCCAACCGCCTGGCCCATCACCTGATCGGCCTGGGCATCGGCCCGGATGATCGGGTAGCGATCTGCGTCGAACGCGGTGTGGAGATGATGGTCGGCCTGTTGGGCGTGCTCAAGGCCGGTGCGGCCTATGTGCCACTGGACCCGGCTTACCCGGCCGAGCGTCTGGCCTATATGATCGAGGACAGCAAGCCGTCGGCCTTGCTGGCCCAGCGTGCATTGCAGAGCCATTTACCTGCACTGGCCATGCCGCTGGTGCTGCTCGACGACGATCAGCGCCAAGGCTTTGCCGAACGCGACGATAACCCGGTGGTG…	CCCCCCC[C@H](CC(=O)N/C(=C\C)/C(=O)N1CCC[C@@H]1C(=O)N[C@H]([C@H](C)CC)C(=O)N[C@H](C(C)C)C(=O)N[C@H](C)C(=O)N[C@H](C)C(=O)N[C@@H](C)C(=O)N[C@H](C(C)C)C(=O)N[C@H](CO)C(=O)N[C@H](C)C(=O)N[C@H](C(C)C)C(=O)N[C@H](C)C(=O)N[C@H](CC(C)C)C(=O)N/C(=C\C)/C(=O)N[C@@H]2[C@H](OC(=O)[C@@H](NC(=O)[C@H](NC(=O)[C@@H](NC(=O)[C@@H](NC2=O)C)CCN)CO)CC3=CC=CC=C3)C)O	[]	['doi:10.1073/pnas.1721790115']
BGC0001629	NRP	Pseudomonas sp. QS1027	jessenipeptin	nrpspksdomains_jesC_AMP-binding.8	serine	ser	FETRVAISGDAVAVVDEKGSLTYDALNRQANRIAHRLIGLGIGPDDRVAICVDRSLEMVAGLMGILKAGAAYVPLDPDYPIDRLTYMLENCAPAVVLTQEALRAVLPASNVPVLLLDPEYAEHEGFLAQPDSNPLRAEVRPEHLAYVIYTSGSTGQPKGVMNEHRGVVNRLLWMQDEYGLDASDSVLQKTPFSFDVSVWEFFWPLFNGARLVMARPGGHRDPGYLRKVIREQNITTLHFVPSMLDLFLAHGEAGGSGLLRVMCSGEALPGHLVRRFKQQLPEVGLFNLYGPTEAAVDVTAWDCAGPLDETPDNTPIGKPVANTRIYLLDASRQPVPLGVAGELYIGGVQVARGYLNRPELSAERFLDDPFTAGRMYRTGDLGRYLPDGTVEYLGRNDDQ…	TTTGAAACTCGTGTTGCAATCAGTGGTGACGCAGTAGCGGTCGTCGACGAGAAGGGCAGTCTGACTTACGACGCACTCAACCGTCAGGCCAACCGTATCGCCCATCGTCTGATCGGCCTGGGCATTGGTCCGGATGATCGGGTGGCAATCTGTGTCGACCGCAGCCTGGAAATGGTGGCGGGGCTGATGGGGATTCTCAAGGCCGGCGCTGCGTATGTGCCGCTGGACCCGGATTATCCGATTGATCGCCTGACCTACATGCTGGAGAACTGTGCTCCTGCGGTGGTCCTCACCCAAGAGGCTTTGCGTGCGGTGCTTCCAGCCAGCAACGTACCGGTGCTGTTGCTCGATCCTGAGTATGCCGAGCACGAAGGTTTCCTCGCACAACCAGATAGCAAT…	CCCCCCC[C@H](CC(=O)N/C(=C\C)/C(=O)N1CCC[C@@H]1C(=O)N[C@H]([C@H](C)CC)C(=O)N[C@H](C(C)C)C(=O)N[C@H](C)C(=O)N[C@H](C)C(=O)N[C@@H](C)C(=O)N[C@H](C(C)C)C(=O)N[C@H](CO)C(=O)N[C@H](C)C(=O)N[C@H](C(C)C)C(=O)N[C@H](C)C(=O)N[C@H](CC(C)C)C(=O)N/C(=C\C)/C(=O)N[C@@H]2[C@H](OC(=O)[C@@H](NC(=O)[C@H](NC(=O)[C@@H](NC(=O)[C@@H](NC2=O)C)CCN)CO)CC3=CC=CC=C3)C)O	[]	['doi:10.1073/pnas.1721790115']
BGC0001629	NRP	Pseudomonas sp. QS1027	jessenipeptin	nrpspksdomains_jesC_AMP-binding.9	phenylalanine	phe	FEAHAAARPEAIAVRQGELTVSYGELDTRANALAHSLREQGVVPGTRVAILLDRSIDLLASLLATLKCGAAYLALDRLAPEERVRFMLEDSEAIVLLTRSDLSAPEGTPRLNLDTLEPVTLAVNQAPPALEDNTAGDTPACIIYTSGSTGQPKGVIVSHNGLARLVQDNGYYDFSPEDRVAFSSNPAFDASSPEIWGALLNGGQSVIVEHQVLLEPTAFARLLQRSEVTVLITSTALFNLYAGLIPEALAGLRMVMCGGERADPASFRRVREHSSTVRLFNGYGPTEATTCASRYEVFDVLPGTLGLPIGQPNANVRIYVLNARREPVPVGVVGEMYIGGAGVALGYLNRPEMTAERFSDDSFAEHLGGRLYRTGDLARWLPDGNLEYLARNDGQVKIR	TTCGAGGCCCATGCGGCGGCGCGGCCAGAGGCAATTGCGGTACGTCAGGGCGAGTTGACCGTGAGTTACGGCGAACTCGATACCCGCGCCAATGCCTTGGCCCACAGCCTGCGGGAGCAGGGCGTGGTGCCGGGAACCCGGGTGGCGATCCTGCTGGATCGTTCGATTGACTTGCTGGCGAGCCTGTTGGCGACCCTCAAGTGCGGCGCCGCCTACCTGGCGCTGGATCGCCTGGCTCCCGAGGAGCGCGTGCGCTTCATGCTAGAAGACAGTGAAGCCATTGTGCTGCTGACCCGCAGCGACCTGTCGGCCCCCGAAGGTACGCCACGCTTGAACCTGGACACCCTGGAACCCGTAACTCTGGCGGTCAATCAGGCACCACCGGCACTTGAGGACAAC…	CCCCCCC[C@H](CC(=O)N/C(=C\C)/C(=O)N1CCC[C@@H]1C(=O)N[C@H]([C@H](C)CC)C(=O)N[C@H](C(C)C)C(=O)N[C@H](C)C(=O)N[C@H](C)C(=O)N[C@@H](C)C(=O)N[C@H](C(C)C)C(=O)N[C@H](CO)C(=O)N[C@H](C)C(=O)N[C@H](C(C)C)C(=O)N[C@H](C)C(=O)N[C@H](CC(C)C)C(=O)N/C(=C\C)/C(=O)N[C@@H]2[C@H](OC(=O)[C@@H](NC(=O)[C@H](NC(=O)[C@@H](NC(=O)[C@@H](NC2=O)C)CCN)CO)CC3=CC=CC=C3)C)O	[]	['doi:10.1073/pnas.1721790115']
BGC0001806	NRP	Pseudomonas tolaasii	tolaasin A	nrpspksdomains_APU91750.1_AMP-binding.1	threonine	thr	FEARAASRPDATAVVFHEQRLSYAELNRRANQVAHRLLSLGVRPDDRVAICVERGLEMIVGLLGILKAGAGYVPIDPAYPQERISYTLQDSAPVAVLVQAATQALVAELAVPVIDLDATSLHQESIQDPQVAGLTATSLAYVIYTSGSTGLPKGVMIEHRNVTRLFTATDAWFSFNDQDVWALFHSFAFDFSVWEIWGALIHGGQLLVVPQVTSRSPDECYALLCSAGVTILNQTPSAFRSLIAAQGQSALQHSLRQVIFGGEALEPAILKPWYARMANAGTQLVNMYGITETTVHVTYPALEAADAQLVGTSPIGGRIPDLRLYVLDAQGRPVPHGVEGELYVGGAGVARGYLNRPELNAERFLHDPFDPTPGARMYRTGDLGRWQADGSIDYLGRND…	TTTGAAGCCCGGGCCGCCTCACGGCCCGATGCGACGGCCGTGGTTTTCCACGAGCAGCGCTTGAGCTACGCCGAGTTGAACCGTCGCGCTAACCAGGTGGCGCACCGTCTGTTAAGCCTGGGTGTGCGCCCGGATGACCGGGTGGCGATCTGCGTTGAGCGCGGCCTGGAAATGATCGTCGGGCTGCTGGGTATCCTCAAGGCCGGCGCCGGTTATGTGCCGATCGACCCGGCCTATCCCCAGGAACGCATCAGCTACACCTTGCAGGACAGCGCGCCGGTGGCGGTGCTGGTACAGGCGGCGACCCAGGCACTGGTGGCCGAGCTCGCGGTGCCGGTGATTGATCTGGACGCAACGAGCCTGCACCAGGAATCGATACAGGACCCGCAGGTTGCAGGC…	CCC(C)C1NC(=O)C(NC(=O)C(\NC(=O)C(NC(=O)C(CC(C)C)NC(=O)C(CCC(N)=O)NC(=O)C(NC(=O)C(NC(=O)C(CC(C)C)NC(=O)C(CO)NC(=O)C(NC(=O)C(CC(C)C)NC(=O)C(CO)NC(=O)C2CCCN2C(=O)C(\NC(=O)CCCC(O)=O)=C\C)C(C)C)C(C)C)C(C)C)C(C)C)=C\C)C(C)OC(=O)C(CCCCN)NC(=O)C(CCN)NC(=O)C(CCO)NC1=O	['Structure-based inference', 'Mass spectrometry', 'Sequence-based prediction']	['pubmed:24222604']
BGC0001806	NRP	Pseudomonas tolaasii	tolaasin A	nrpspksdomains_APU91750.1_AMP-binding.2	proline	pro	FEAQVLRQPDVTAVTYEGQALSYGQLNSLANRIAHRLIADGMGVNDRVAICAERSLEMVAGLLAILKAGAGYVPLDPAYPDERLAYMLHDSAPKALLTQQSLAQRFGAAGVPTVCLDNPAGIDAQPAHNPLVQGLQADALAYVIYTSGSTGQPKGVAMPHGPLVNLMQWQIAQTVADGREAQRTLQFAALGFDVAFQEVFSTLCAGGELSLIHGDVRLNFRQLFRHICEQRIQRLYLPCIALQALAEAVADEPELGGLACALSDVITAGEQLRISAQMRALFQRLPGCRLHNHYGPTESHVTTALTLDGDAASWPVLPSIGVPVANTRIYLLDEQLQPVPLGVAGEIYIGGACVARGYLHRDDLTAERFLADPFVAGGRLYKTGDLGRHQPTGEIDYLG…	TTCGAGGCCCAGGTGCTGCGCCAGCCTGACGTTACTGCGGTGACGTACGAAGGCCAGGCGTTGAGCTACGGCCAATTGAACAGCCTGGCCAACCGTATCGCCCATCGCCTGATCGCTGATGGCATGGGTGTGAATGATCGTGTGGCGATCTGCGCCGAACGCAGCCTGGAAATGGTCGCCGGATTACTGGCGATTCTCAAGGCGGGCGCGGGCTACGTGCCACTCGACCCGGCCTATCCGGACGAACGCCTGGCCTACATGCTCCACGACAGCGCGCCCAAGGCGCTGTTGACCCAACAATCCCTGGCGCAGCGTTTCGGCGCGGCGGGCGTGCCCACCGTGTGTCTCGACAACCCGGCGGGCATCGACGCACAACCTGCGCATAACCCGCTGGTGCAA…	CCC(C)C1NC(=O)C(NC(=O)C(\NC(=O)C(NC(=O)C(CC(C)C)NC(=O)C(CCC(N)=O)NC(=O)C(NC(=O)C(NC(=O)C(CC(C)C)NC(=O)C(CO)NC(=O)C(NC(=O)C(CC(C)C)NC(=O)C(CO)NC(=O)C2CCCN2C(=O)C(\NC(=O)CCCC(O)=O)=C\C)C(C)C)C(C)C)C(C)C)C(C)C)=C\C)C(C)OC(=O)C(CCCCN)NC(=O)C(CCN)NC(=O)C(CCO)NC1=O	['Structure-based inference', 'Mass spectrometry', 'Sequence-based prediction']	['pubmed:24222604']
BGC0001806	NRP	Pseudomonas tolaasii	tolaasin A	nrpspksdomains_APU91750.1_AMP-binding.3	serine	ser	FEAQVERTPDAVAVLADGQRLSYRELNAQANGLAHHLRAHGVQPDSPVAICVERSADMVVGLLAILKAGGAYVPLDPAYPQDRLAYMLEDSAPAVVLVQTATRNLLGDIGVPVVNLDHANWQHLPSSNPSVAALTPQHAAYVIYTSGSTGKPKGVINEHSAVVNRLLWMQEEYGLTADDSVLQKTPFSFDVSVWEFFWPLFTGARLVMARPGGHKDPQYLCDIIEAEQVTTLHFVPSMLDVFLAHGDVSQAAGLVRVMCSGEALPGSVVRRFKEQLPGSQLFNLYGPTEAAVDVTAWDCSGTSTPDNTPIGKAIANTRMYVLDAHLQPVPLGVSGELYIGGVQVARGYLNRPDLTAERFLNDPFSEGRLYRTGDVGRFLPDGNIEYLGRNDDQVKIR	TTCGAAGCCCAGGTTGAACGCACCCCCGACGCAGTTGCCGTGTTGGCCGACGGCCAGCGCCTGAGCTACCGCGAGCTGAACGCCCAGGCCAACGGCCTGGCCCATCACCTGCGGGCGCACGGCGTGCAGCCGGATTCGCCGGTGGCGATCTGCGTCGAGCGCAGCGCCGACATGGTGGTCGGCCTGCTGGCCATCCTCAAGGCTGGCGGCGCGTATGTGCCGCTGGACCCGGCCTATCCGCAGGACCGCCTGGCCTACATGCTGGAAGACAGCGCCCCGGCTGTGGTGCTGGTGCAAACCGCCACCCGTAACTTGCTGGGTGACATCGGCGTACCGGTGGTGAACCTCGATCACGCCAACTGGCAGCACCTGCCGTCCAGCAACCCGTCGGTTGCCGCG…	CCC(C)C1NC(=O)C(NC(=O)C(\NC(=O)C(NC(=O)C(CC(C)C)NC(=O)C(CCC(N)=O)NC(=O)C(NC(=O)C(NC(=O)C(CC(C)C)NC(=O)C(CO)NC(=O)C(NC(=O)C(CC(C)C)NC(=O)C(CO)NC(=O)C2CCCN2C(=O)C(\NC(=O)CCCC(O)=O)=C\C)C(C)C)C(C)C)C(C)C)C(C)C)=C\C)C(C)OC(=O)C(CCCCN)NC(=O)C(CCN)NC(=O)C(CCO)NC1=O	['Structure-based inference', 'Mass spectrometry', 'Sequence-based prediction']	['pubmed:24222604']
BGC0001806	NRP	Pseudomonas tolaasii	tolaasin A	nrpspksdomains_APU91750.1_AMP-binding.4	leucine	leu	FEVRAVEQPEAIAVRQGDHQLTYRQLDRRANQLAHSLIEQGVSPDDRVAICARRSLETLVGLLAILKAGAAYVPIDPAHPQERISYLLQDSAPKVLLAQSDTRNLLGDTHTPVIALDGDQWHYQPTGTPSVAGLTPTNLAYVIYTSGSTGLPKGVMVEHRTLENLVNWHCDAFDLQAGSHTSSVAGFGFDAMAWEIWPALCVGATLHLPPAQQAHEDIDALLSWWTAQPLDVSFLPTPVAEYAFSQHLEHPTLKTLLIGGDRLRHFSTSQRFTLVNNYGPTEATVVATSGRIVAGRTLHIGQPIANTQVYVLDAHLQPVARGVTGELYVGGAGVARGYLNRPEMTAERFIRDPFSHAPDARLYRTGDLARWLEDGTLDYLRRNDDQVKIR	TTTGAAGTCCGCGCCGTGGAGCAGCCCGAGGCCATTGCCGTGCGCCAGGGCGATCATCAACTGACCTACCGTCAGCTCGACAGACGCGCCAACCAGTTGGCGCACAGCCTGATCGAACAGGGTGTGAGCCCGGACGATCGGGTCGCCATCTGCGCCCGTCGCAGCCTCGAAACGCTGGTGGGGCTGCTGGCGATCCTCAAGGCCGGTGCGGCCTATGTGCCTATCGACCCGGCCCACCCGCAGGAACGCATCAGTTACCTGTTGCAGGACAGTGCCCCGAAGGTGCTTCTGGCCCAGTCGGATACCCGCAACCTGTTGGGCGACACCCACACGCCGGTGATCGCGCTGGACGGCGATCAATGGCATTACCAGCCGACCGGCACCCCGAGCGTGGCCGGC…	CCC(C)C1NC(=O)C(NC(=O)C(\NC(=O)C(NC(=O)C(CC(C)C)NC(=O)C(CCC(N)=O)NC(=O)C(NC(=O)C(NC(=O)C(CC(C)C)NC(=O)C(CO)NC(=O)C(NC(=O)C(CC(C)C)NC(=O)C(CO)NC(=O)C2CCCN2C(=O)C(\NC(=O)CCCC(O)=O)=C\C)C(C)C)C(C)C)C(C)C)C(C)C)=C\C)C(C)OC(=O)C(CCCCN)NC(=O)C(CCN)NC(=O)C(CCO)NC1=O	['Structure-based inference', 'Mass spectrometry', 'Sequence-based prediction']	['pubmed:24222604']
BGC0001806	NRP	Pseudomonas tolaasii	tolaasin A	nrpspksdomains_APU91750.1_AMP-binding.5	valine	val	FEAQVVAHAHAVAAVQGAVSLSYTQLNARANKLAHDLLGLGAAPGDKVAILLERSVDLLVAQLAISKCAAVYVPLDVNAPTDRQAFMIEDSGARWVLTTSGTEVSGHRFDLDSLNLSAEPEHNPALEQSSETAAYIMYTSGSTGTPKGVLVPHRAITRLVINNGYAEFNPQDRVAFASNPAFDASTLDVWAPLLNGGAVVVVDQDTLLSREAFAALLQEQSISVLWMTAGLFHQYAEGLLPVFPQLRYLIVGGDVLDPSVIARVLKDGAPQHLLNGYGPTEATTFSTTHEILRADEGSIPIGKPVGNSRAYVLDARQQPVPVGVAGELYIGGQGVALGYLNRADLTAHAFLVDPFNDGGLMYRTGDLVAWRADGTLQYLGRNDQQVKIR	TTTGAAGCTCAAGTGGTTGCGCATGCGCACGCCGTGGCGGCGGTGCAGGGCGCGGTCTCACTGAGCTACACGCAACTGAACGCACGCGCCAACAAACTGGCCCACGACCTCTTAGGCCTTGGCGCAGCGCCGGGCGACAAGGTGGCGATACTGCTGGAACGCTCCGTGGATTTGCTGGTGGCCCAGTTGGCAATCAGCAAGTGCGCGGCGGTGTATGTGCCGCTGGACGTGAACGCACCGACGGATCGTCAAGCCTTCATGATTGAAGACAGTGGCGCACGCTGGGTACTGACCACCAGCGGCACCGAGGTATCTGGCCATCGTTTTGACCTGGACAGTCTCAACCTGAGTGCCGAGCCCGAGCACAATCCGGCCCTTGAACAATCGTCGGAAACCGCC…	CCC(C)C1NC(=O)C(NC(=O)C(\NC(=O)C(NC(=O)C(CC(C)C)NC(=O)C(CCC(N)=O)NC(=O)C(NC(=O)C(NC(=O)C(CC(C)C)NC(=O)C(CO)NC(=O)C(NC(=O)C(CC(C)C)NC(=O)C(CO)NC(=O)C2CCCN2C(=O)C(\NC(=O)CCCC(O)=O)=C\C)C(C)C)C(C)C)C(C)C)C(C)C)=C\C)C(C)OC(=O)C(CCCCN)NC(=O)C(CCN)NC(=O)C(CCO)NC1=O	['Structure-based inference', 'Mass spectrometry', 'Sequence-based prediction']	['pubmed:24222604']
BGC0001806	NRP	Pseudomonas tolaasii	tolaasin A	nrpspksdomains_APU91750.1_AMP-binding.6	serine	ser	FEAQVERTPDAVAVLADGQRLSYRELNAQANRLAHHLRAHGVQPDSPVAICVERSADMVVGLLAILKAGGAYVPLDPAYPQDRLAYMLEDSAPAVVLVQTATRNLLGDIGVPVVNLDHANWQHLPSSNPSVAALTPQHAAYVIYTSGSTGKPKGVINEHSAVVNRLLWMQEEYGLTADDSVLQKTPFSFDVSVWEFFWPLFTGARLVMARPGGHKDPQYLCDIIEAEQVTTLHFVPSMLDVFLAHGDVSQAAGLVRVMCSGEALPGSVVRRFKEQLPGSQLFNLYGPTEAAVDVTAWDCNGTLTPDNTPIGKAIANTRMYVLDAHLQPVPLGVSGELYIGGVQVARGYLNRPDLTAERFLNDPFSDGRLYRTGDVGRFLPDGNIEYLGRNDDQVKIR	TTCGAAGCCCAGGTTGAACGCACCCCCGACGCGGTTGCCGTGTTGGCCGACGGCCAGCGCCTGAGCTACCGCGAGCTGAACGCCCAGGCCAACCGCCTGGCCCATCACCTGCGGGCGCACGGCGTGCAGCCGGATTCGCCGGTGGCGATCTGCGTCGAGCGCAGCGCCGACATGGTGGTCGGCCTGCTGGCCATCCTCAAGGCTGGCGGCGCGTATGTGCCGCTGGACCCGGCCTATCCGCAGGACCGCCTGGCCTACATGCTGGAAGACAGCGCCCCGGCTGTGGTGCTGGTGCAAACCGCCACCCGTAACTTGCTGGGTGACATCGGCGTACCGGTGGTGAACCTCGATCACGCCAACTGGCAGCACCTGCCGTCCAGCAACCCGTCGGTTGCCGCG…	CCC(C)C1NC(=O)C(NC(=O)C(\NC(=O)C(NC(=O)C(CC(C)C)NC(=O)C(CCC(N)=O)NC(=O)C(NC(=O)C(NC(=O)C(CC(C)C)NC(=O)C(CO)NC(=O)C(NC(=O)C(CC(C)C)NC(=O)C(CO)NC(=O)C2CCCN2C(=O)C(\NC(=O)CCCC(O)=O)=C\C)C(C)C)C(C)C)C(C)C)C(C)C)=C\C)C(C)OC(=O)C(CCCCN)NC(=O)C(CCN)NC(=O)C(CCO)NC1=O	['Structure-based inference', 'Mass spectrometry', 'Sequence-based prediction']	['pubmed:24222604']
BGC0001806	NRP	Pseudomonas tolaasii	tolaasin A	nrpspksdomains_APU91750.1_AMP-binding.7	leucine	leu	EQQAERSPEALAVVYDGQTLTYAELNRQANQLAYRLIELGVQPDDRVAICARRSLETLVGLVAILKAGAAYVPVDPAHPLDRIGYLLEDSAPVAVLVQPGLTERLPAMSVPVLELDRRLLEGAARANPQIDGLTPAHLAYVIYTSGSTGLPKGVMVEHQTLDNLVNWHCEAFNLNAGSHTSSVAGFGFDAMAWEVWPALCVGATLHLPPAAQGNEDIDALLAWWLAQPLDVSFLPTPVAEYAFSQNLQHPTLKTLLIGGDRLRQFTQAQRFTLVNNYGPTEATVVATSGVIEAGQTLHIGKPVANAQVYVLDAQLKPVPLGVAGELYVGGAGVARGYLNRAQMTAERFLKDPFSADPQARMYRTGDLVRWLEDGRLDYLGRNDDQVKIR	GAACAGCAGGCAGAGCGCAGCCCCGAGGCGCTCGCAGTGGTGTACGACGGCCAAACGCTGACCTACGCCGAGCTGAACCGGCAAGCCAACCAGCTGGCCTATCGTCTGATCGAACTGGGCGTGCAGCCGGATGATCGCGTGGCGATCTGCGCGCGTCGCAGCCTGGAAACCCTGGTGGGACTGGTCGCGATCCTCAAGGCCGGCGCGGCCTACGTGCCCGTCGACCCGGCCCACCCACTGGACCGCATCGGCTATTTGCTCGAAGACAGCGCTCCGGTGGCGGTGCTGGTACAACCCGGGCTAACCGAGCGCTTGCCGGCGATGAGCGTGCCGGTACTCGAACTCGACCGCCGGTTGCTGGAAGGCGCCGCGCGCGCCAATCCACAGATTGACGGCCTG…	CCC(C)C1NC(=O)C(NC(=O)C(\NC(=O)C(NC(=O)C(CC(C)C)NC(=O)C(CCC(N)=O)NC(=O)C(NC(=O)C(NC(=O)C(CC(C)C)NC(=O)C(CO)NC(=O)C(NC(=O)C(CC(C)C)NC(=O)C(CO)NC(=O)C2CCCN2C(=O)C(\NC(=O)CCCC(O)=O)=C\C)C(C)C)C(C)C)C(C)C)C(C)C)=C\C)C(C)OC(=O)C(CCCCN)NC(=O)C(CCN)NC(=O)C(CCO)NC1=O	['Structure-based inference', 'Mass spectrometry', 'Sequence-based prediction']	['pubmed:24222604']
BGC0001806	NRP	Pseudomonas tolaasii	tolaasin A	nrpspksdomains_APU91750.1_AMP-binding.8	valine	val	FEALVAAQPQALAAVQNGQRLTYGELNNRANRLAHHLLALGTAPGERVAILLERSLDLLVAQLAISKCAAVYVPLDVNAPTDRQAFMIEDSGARWVLTTRDTEVSGQRLDLDTLDLGDQPEHNPALEQSSETAAYIMYTSGSTGTPKGVLVPHRAITRLVINNGYAEFNPQDRVAFASNPAFDASTLDVWAPLLNGGAVVVVDQDTLLSRDAFAALLQEQSISVLWMTAGLFHQYAEGLLPVFPQLRYLIVGGDVLDPSVIARVLKDGAPQHLLNGYGPTEATTFSTTHEILRADEGSIPIGKPVGNSRAYVLDARQQPVPVGVAGELYIGGQGVALGYLNRADLTAHAFLVDPFNDGGLMYRTGDLVAWRADGTLQYLGRNDQQVKIR	TTTGAAGCGCTCGTGGCCGCGCAGCCTCAGGCACTGGCCGCCGTGCAAAATGGGCAGCGACTGACTTATGGAGAACTGAACAACCGCGCCAACCGCCTGGCCCACCACCTGCTGGCCCTCGGCACAGCACCGGGTGAGCGGGTGGCGATCCTACTCGAGCGCTCCCTGGATTTGCTGGTGGCCCAGTTGGCAATCAGCAAGTGCGCGGCGGTGTATGTGCCGCTGGACGTGAACGCACCGACGGATCGTCAAGCCTTCATGATTGAAGACAGTGGCGCGCGTTGGGTGCTGACCACCCGCGACACCGAGGTATCTGGCCAGCGCCTTGACCTGGATACCCTTGATCTCGGCGATCAGCCGGAGCACAACCCGGCCCTTGAACAATCGTCGGAAACCGCC…	CCC(C)C1NC(=O)C(NC(=O)C(\NC(=O)C(NC(=O)C(CC(C)C)NC(=O)C(CCC(N)=O)NC(=O)C(NC(=O)C(NC(=O)C(CC(C)C)NC(=O)C(CO)NC(=O)C(NC(=O)C(CC(C)C)NC(=O)C(CO)NC(=O)C2CCCN2C(=O)C(\NC(=O)CCCC(O)=O)=C\C)C(C)C)C(C)C)C(C)C)C(C)C)=C\C)C(C)OC(=O)C(CCCCN)NC(=O)C(CCN)NC(=O)C(CCO)NC1=O	['Structure-based inference', 'Mass spectrometry', 'Sequence-based prediction']	['pubmed:24222604']
BGC0001806	NRP	Pseudomonas tolaasii	tolaasin A	nrpspksdomains_APU91750.1_AMP-binding.9	valine	val	FQQQAAATPHAVAAVQGAVSLSYTQLNARANKLAHHLLGLGAAPGDKVAILLERSMDLLVAQLAISKCAAVYVPLDVNAPTDRQAFMIEDSGARWVLTTSNTEVSGHRLDLDTLDLGDQPEHNPALEQSSETAAYIMYTSGSTGTPKGVLVPHRAITRLVINNGYAEFNPQDRVAFASNPAFDASTLDVWAPLLNGGAVVVVDQDTLLSREAFATLLQEQSVSVLWMTAGLFHQYAEGLLPVFPQLRYLIVGGDVLDPSVIARVLKDGAPQHLLNGYGPTEATTFSTTHEIQRADEGSIPIGKPVGNSRAYVLDARQQPVPVGVAGELYIGGQGVALGYLNRADLTAHAFLVDPFNDGGLMYRTGDLVAWRADGTLQYLGRNDQQVKIR	TTCCAGCAGCAGGCCGCGGCAACGCCGCACGCCGTGGCGGCGGTGCAGGGTGCGGTTTCACTGAGCTACACACAACTGAACGCGCGGGCCAACAAACTGGCCCACCACCTGCTCGGCCTCGGTGCAGCGCCGGGTGACAAGGTGGCGATACTGCTGGAACGCTCGATGGATTTGCTGGTGGCGCAGTTGGCAATCAGCAAGTGCGCGGCGGTGTATGTGCCGCTGGACGTGAATGCCCCGACCGATCGTCAAGCCTTCATGATTGAAGACAGCGGCGCGCGCTGGGTACTGACCACCAGCAACACCGAGGTATCTGGCCATCGTCTTGACCTGGATACCCTTGATCTCGGCGATCAGCCGGAACACAACCCGGCCCTTGAACAATCGTCGGAAACCGCC…	CCC(C)C1NC(=O)C(NC(=O)C(\NC(=O)C(NC(=O)C(CC(C)C)NC(=O)C(CCC(N)=O)NC(=O)C(NC(=O)C(NC(=O)C(CC(C)C)NC(=O)C(CO)NC(=O)C(NC(=O)C(CC(C)C)NC(=O)C(CO)NC(=O)C2CCCN2C(=O)C(\NC(=O)CCCC(O)=O)=C\C)C(C)C)C(C)C)C(C)C)C(C)C)=C\C)C(C)OC(=O)C(CCCCN)NC(=O)C(CCN)NC(=O)C(CCO)NC1=O	['Structure-based inference', 'Mass spectrometry', 'Sequence-based prediction']	['pubmed:24222604']
BGC0001806	NRP	Pseudomonas tolaasii	tolaasin A	nrpspksdomains_APU91750.1_AMP-binding.10	glutamine	gln	EAQAARAPASIAVVLGDQQLSYHDLNERANRVAHHLRSLGAGADSCVAICMPRSLELIVGLLGILKSGAAYVPLDPEYPAQRLAFALQDSQPLAVLVQDATRGVLGATAVPLVDLADADVAGQPLDNPPALATAHDLAYVIFTSGSTGRPKGVMVEHGSLVNHISWQTRAFGFDATDRILQRTSVAFDASVWEIWTPLAIGARLVLLPAEASRDVEHMARTLVEQGVSIAQFVPSLLRLLVQLPETGVRCRYLFSGGEALDPQLAMQARALTTHGVVNLYGPTEATIDSTSWTFNDAGPLEAVPIGKPIANARAYVLDAHLQLLPLGVAGELYIGGAGVARGYLGRDDLTAERFLADPFNPGGRLYKTGDLVRYLADGTLEYLGRNDDQIKLR	GAGGCCCAGGCCGCTCGGGCCCCGGCGTCAATTGCCGTGGTGCTGGGCGACCAGCAGTTGAGCTACCACGACCTGAACGAACGGGCCAATCGCGTCGCCCATCATTTGCGCAGCCTCGGCGCGGGCGCCGATAGCTGCGTGGCGATCTGCATGCCGCGCAGCCTGGAGCTGATTGTCGGCTTGCTGGGCATCCTCAAGTCCGGCGCCGCCTATGTGCCGCTGGACCCCGAATACCCGGCGCAACGCCTGGCATTCGCGCTGCAGGACAGCCAGCCGCTGGCGGTGCTGGTGCAGGATGCCACCCGTGGCGTGCTGGGCGCCACGGCGGTGCCGCTGGTTGACCTGGCGGATGCCGACGTGGCCGGGCAGCCGCTCGACAATCCGCCCGCCCTGGCCACG…	CCC(C)C1NC(=O)C(NC(=O)C(\NC(=O)C(NC(=O)C(CC(C)C)NC(=O)C(CCC(N)=O)NC(=O)C(NC(=O)C(NC(=O)C(CC(C)C)NC(=O)C(CO)NC(=O)C(NC(=O)C(CC(C)C)NC(=O)C(CO)NC(=O)C2CCCN2C(=O)C(\NC(=O)CCCC(O)=O)=C\C)C(C)C)C(C)C)C(C)C)C(C)C)=C\C)C(C)OC(=O)C(CCCCN)NC(=O)C(CCN)NC(=O)C(CCO)NC1=O	['Structure-based inference', 'Mass spectrometry', 'Sequence-based prediction']	['pubmed:24222604']
BGC0001806	NRP	Pseudomonas tolaasii	tolaasin A	nrpspksdomains_APU91750.1_AMP-binding.11	leucine	leu	FETQVELYPHAMAVVYQGQSLTYSELNRQANQLAHQLIELGVQPDDRVAICTRRSLEMLVGLVAILKAGACYVPIDPAHPAERLSYLLEDSAPVAVLIQPALAQRLPTVTAPVLELDSRLWQGPSKGNPQVSGLTPAHLAYVIYTSGSTGLPKGVMVEHQTLENLVNWHCDAFELRHGSHTSSVAGFGFDAMAWEVWPALCVGATLHLPPAREGSEDIDALLKWWLAQPLDVSFLPTPVAEYAFSQTLQHPTLKTLLVGGDRLRQFHTPQRFKLVNNYGPTEATVVATSGVVEAGQALHIGRPVANTQVYLLDAQQQPVPVGVAGELYVAGAGVARGYLNRAQMTAERFLKDPFSHDPQARMYRTGDLARWLPDGTLDYLGRNDDQVKIR	TTTGAAACCCAGGTCGAGCTGTACCCTCACGCGATGGCCGTGGTGTACCAGGGCCAAAGCCTGACCTACAGCGAGTTGAACCGGCAGGCCAATCAGCTGGCGCACCAGTTGATCGAACTGGGTGTACAGCCTGACGACCGCGTGGCTATCTGCACGCGGCGCAGCCTGGAAATGCTGGTCGGGCTGGTGGCGATTCTCAAGGCCGGCGCGTGCTATGTGCCGATCGACCCGGCGCACCCGGCCGAACGCCTGAGTTACCTGCTGGAGGACAGCGCGCCTGTGGCCGTGCTGATCCAGCCCGCCCTGGCGCAACGCCTGCCGACCGTGACCGCGCCAGTGCTGGAGCTGGACAGTCGCCTGTGGCAAGGGCCGTCGAAGGGTAACCCGCAGGTCAGCGGG…	CCC(C)C1NC(=O)C(NC(=O)C(\NC(=O)C(NC(=O)C(CC(C)C)NC(=O)C(CCC(N)=O)NC(=O)C(NC(=O)C(NC(=O)C(CC(C)C)NC(=O)C(CO)NC(=O)C(NC(=O)C(CC(C)C)NC(=O)C(CO)NC(=O)C2CCCN2C(=O)C(\NC(=O)CCCC(O)=O)=C\C)C(C)C)C(C)C)C(C)C)C(C)C)=C\C)C(C)OC(=O)C(CCCCN)NC(=O)C(CCN)NC(=O)C(CCO)NC1=O	['Structure-based inference', 'Mass spectrometry', 'Sequence-based prediction']	['pubmed:24222604']
BGC0001806	NRP	Pseudomonas tolaasii	tolaasin A	nrpspksdomains_APU91750.1_AMP-binding.12	valine	val	FESWAQAQPQAVAAVHGAQQVSYAELNARANRLAHHLAGLGMPAGSSVAVLLERSIELLVSQLALSKCALVYVPLDVNAPVERQAFMLSDSQATLLLSHAGLGKALQVQRLDLDQTQFSQLRDDNLAAQVSSEAAAYIMYTSGSTGTPKGVRVPHRAITRLVINNGYADFNQHDRVAFASNPAFDASTLEVWAPLLNGGALVVIDQDTLLAQHRFAALLQQQAVSVVWMTAGLFHQYAEGLLEAFARLRYLIVGGDVLDPSVIARVLKGGAPRHLLNGYGPTEATTFSTTHEITRADEGSIPIGKPVGNSRAYVLDAHQQPVPVGVTGELYIGGQGVALGYLNRPELTAEKFLVDPFSEGGLMYRTGDLVAWRADGTLQYQGRNDQQVKIR	TTCGAGTCGTGGGCACAGGCGCAGCCGCAGGCCGTGGCGGCAGTGCATGGCGCGCAACAGGTGAGCTATGCCGAACTGAACGCCCGCGCCAACCGTCTGGCCCATCACTTGGCCGGCCTGGGAATGCCGGCGGGGTCAAGCGTGGCCGTGCTGCTGGAACGTTCGATTGAACTGCTTGTGAGTCAACTGGCCCTCAGCAAGTGCGCGCTGGTGTATGTGCCGCTGGACGTCAATGCACCCGTCGAGCGTCAGGCTTTCATGCTCAGCGACAGCCAGGCGACATTACTGTTGAGCCACGCCGGGCTGGGCAAGGCGTTGCAGGTGCAACGGCTTGATCTGGATCAGACGCAGTTCAGCCAACTGCGTGATGACAACCTGGCGGCGCAGGTCAGCAGCGAA…	CCC(C)C1NC(=O)C(NC(=O)C(\NC(=O)C(NC(=O)C(CC(C)C)NC(=O)C(CCC(N)=O)NC(=O)C(NC(=O)C(NC(=O)C(CC(C)C)NC(=O)C(CO)NC(=O)C(NC(=O)C(CC(C)C)NC(=O)C(CO)NC(=O)C2CCCN2C(=O)C(\NC(=O)CCCC(O)=O)=C\C)C(C)C)C(C)C)C(C)C)C(C)C)=C\C)C(C)OC(=O)C(CCCCN)NC(=O)C(CCN)NC(=O)C(CCO)NC1=O	['Structure-based inference', 'Mass spectrometry', 'Sequence-based prediction']	['pubmed:24222604']
BGC0001806	NRP	Pseudomonas tolaasii	tolaasin A	nrpspksdomains_APU91751.1_AMP-binding.1	threonine	thr	EARAAAQPDAVAVVFDDQQLSYGALNRRANQVAHRLLALGVRPDDRVAICVERGLDMIIGLLGILKAGAGYVPIDPAYPQERISYTLQDSAPVAVLVQQATYTRVAELSVPVITLDAGDCQDEPAGNPQVAGLTPSSLAYVIYTSGSTGLPKGVMIEHRNVARLFTATEAWFQFNHNDVWALFHSFAFDFSVWEIWGALMHGGQLLIVPQLTSRSPDECYALLCSAGVTILNQTPSAFRALIVAQGQSTLKHALRQVIFGGEALEPGILKPWYAHSANAGTQLVNMYGITETTVHVTYRALEPADAQLVGASPIGGGIPDLQLYVLDDRREPVPVGVVGELYVGGAGVARGYLNRPELNAERFITDPFSGRPDARLYKTGDLGRRLSDGSIDYLGRNDD…	GAAGCCCGTGCGGCGGCGCAGCCTGACGCTGTCGCGGTGGTGTTTGACGATCAGCAACTGAGCTACGGCGCCCTCAACCGGCGCGCCAACCAGGTTGCGCATCGCCTGCTGGCGTTGGGCGTGCGCCCGGATGATCGCGTGGCGATCTGCGTCGAGCGCGGCCTGGACATGATCATTGGCTTGCTGGGCATTCTCAAGGCCGGTGCCGGTTATGTACCGATCGATCCGGCCTATCCGCAGGAGCGCATCAGCTACACCTTGCAAGACAGCGCGCCGGTGGCTGTGCTGGTACAACAGGCAACTTACACTCGGGTAGCCGAGTTGTCGGTGCCGGTGATCACACTGGATGCGGGCGACTGCCAGGACGAACCAGCCGGCAACCCCCAGGTCGCGGGCCTG…	CCC(C)C1NC(=O)C(NC(=O)C(\NC(=O)C(NC(=O)C(CC(C)C)NC(=O)C(CCC(N)=O)NC(=O)C(NC(=O)C(NC(=O)C(CC(C)C)NC(=O)C(CO)NC(=O)C(NC(=O)C(CC(C)C)NC(=O)C(CO)NC(=O)C2CCCN2C(=O)C(\NC(=O)CCCC(O)=O)=C\C)C(C)C)C(C)C)C(C)C)C(C)C)=C\C)C(C)OC(=O)C(CCCCN)NC(=O)C(CCN)NC(=O)C(CCO)NC1=O	['Structure-based inference', 'Mass spectrometry', 'Sequence-based prediction']	['pubmed:24222604']
BGC0001806	NRP	Pseudomonas tolaasii	tolaasin A	nrpspksdomains_APU91751.1_AMP-binding.2	threonine	thr	ERQAAEQPDAIAVVFEDSHLSYAELNTRANRVAHRLLSLGVSPDERVAICVERGLEMIIGLLGILKAGAGYVPIDPAYPQERISYTLQDSAPVAVLVQAATQARVAELAVPVIDLDATDLQLQPIHNPQVPGLTSANLAYVIYTSGSTGLPKGVMIEHRNVARLFSATEGWFNFNDRDVWALFHSFAFDFSVWEIWGALIHGGQLLVVPQLTSRSPDECYALLCSAGVTILNQTPSAFRSLIAAQGQSALKHSLRQVIFGGEALEPGMLKPWYARTANAGTQLVNMYGITETTVHVTYRALEAADAQLVGVSPIGGRIPDLQLYVLDSAREPVPVGVVGELYVGGAGVARGYLNRPELNAERFIADPFSGRADARLYKTGDLGRWLADGSIDYLGRNDD…	GAGCGTCAGGCCGCCGAGCAACCCGATGCCATCGCGGTGGTGTTTGAAGACAGCCACCTGAGCTACGCCGAGCTGAACACGCGTGCGAACAGGGTCGCGCACCGCCTGCTGAGCCTCGGCGTGAGCCCGGACGAGCGGGTGGCAATCTGCGTGGAGCGCGGGCTGGAAATGATCATCGGCTTGCTCGGCATCCTCAAGGCGGGCGCCGGTTACGTGCCGATCGACCCTGCCTATCCGCAGGAACGCATCAGTTACACCCTGCAGGACAGTGCCCCGGTGGCGGTGCTGGTGCAGGCAGCGACGCAGGCGCGGGTGGCCGAACTCGCGGTGCCGGTGATTGACCTGGACGCGACGGACCTGCAGCTGCAGCCGATACACAACCCGCAGGTACCTGGCCTG…	CCC(C)C1NC(=O)C(NC(=O)C(\NC(=O)C(NC(=O)C(CC(C)C)NC(=O)C(CCC(N)=O)NC(=O)C(NC(=O)C(NC(=O)C(CC(C)C)NC(=O)C(CO)NC(=O)C(NC(=O)C(CC(C)C)NC(=O)C(CO)NC(=O)C2CCCN2C(=O)C(\NC(=O)CCCC(O)=O)=C\C)C(C)C)C(C)C)C(C)C)C(C)C)=C\C)C(C)OC(=O)C(CCCCN)NC(=O)C(CCN)NC(=O)C(CCO)NC1=O	['Structure-based inference', 'Mass spectrometry', 'Sequence-based prediction']	['pubmed:24222604']
BGC0001806	NRP	Pseudomonas tolaasii	tolaasin A	nrpspksdomains_APU91751.1_AMP-binding.3	isoleucine	ile	FEAQARTRPDAVAVVHGEQSLNYAQLNRRANRLAHHLISLGVQAGDSVAILLERSVDLLVSQLAISKAAAVYVPLDVNAPADRQTFMRQDSGAQWLLTTSAHQAPEGGGHLELDSLDLSDAPVHDPALEQSAESVAYIMYTSGSTGVPKGVLVPHRGITRLVINGGYADFNPHDRIAFASNPAFDASTMDVWGALLNGGQVVVIDHDTLLDPLRFGAVLSESAATILFTTTALFNQYVQLIPDALKGLRMLLCGGERADPAAFRSLLEHAPKLRLVHCYGPTETTTYATTFEVRALADDAESVPIGGPISNTRIYLLDQRQQPVPLGVVGEIYIGGQGVAKGYLNRPELTAEKFILDPFSREPGALMYRTGDLGRWLAKGELDCLGRNDDQVKIR	TTCGAGGCTCAGGCACGTACCCGGCCCGATGCTGTAGCCGTGGTTCACGGCGAGCAGTCGTTGAACTATGCGCAATTGAACCGGCGCGCCAACCGCCTGGCCCACCACCTGATCAGCCTGGGTGTGCAGGCGGGTGACAGTGTTGCCATTCTGCTGGAGCGCTCCGTGGACTTGCTGGTCAGCCAACTGGCGATCAGCAAGGCAGCGGCGGTATATGTGCCGCTGGATGTCAACGCTCCCGCCGACCGTCAAACCTTCATGCGCCAGGACAGCGGCGCGCAGTGGCTGCTCACCACCAGCGCCCATCAAGCCCCCGAGGGCGGTGGGCACCTGGAACTGGACAGCCTCGATCTGAGCGATGCCCCGGTTCACGACCCGGCGCTTGAACAGTCTGCCGAG…	CCC(C)C1NC(=O)C(NC(=O)C(\NC(=O)C(NC(=O)C(CC(C)C)NC(=O)C(CCC(N)=O)NC(=O)C(NC(=O)C(NC(=O)C(CC(C)C)NC(=O)C(CO)NC(=O)C(NC(=O)C(CC(C)C)NC(=O)C(CO)NC(=O)C2CCCN2C(=O)C(\NC(=O)CCCC(O)=O)=C\C)C(C)C)C(C)C)C(C)C)C(C)C)=C\C)C(C)OC(=O)C(CCCCN)NC(=O)C(CCN)NC(=O)C(CCO)NC1=O	['Structure-based inference', 'Mass spectrometry', 'Sequence-based prediction']	['pubmed:24222604']
BGC0001806	NRP	Pseudomonas tolaasii	tolaasin A	nrpspksdomains_APU91751.1_AMP-binding.4	homoserine	ser	FEAQALRTPDARAVQAGNGSLSYRELNERANRLAHHLRELGVQPDARVAICVERSAELVVGLLAILKAGGAYVPIDPNYPLERIHYMLHDSAPAALLVHSVTAHLAGEPGLPVVDLDRDDAYAAHLHNPQVAELTATHLTYVIYTSGSTGQPKGVMVEHQGVVNMLGWYIDDVGLDADDAVLLLTSHSFDLTQKNIFASLAVGATLHLADSPFDPSSIVRQISDQAITHINLAPSAFYALIDADQQCALSQLRRVVLGGEPIKLSQLEKLQVPRPQFINSYGPTECSDVVAWHAVDADLSRYGVADIPLGRPLRNLTLYVLDAYGQRVPTGSVGELYIGGAGVARGYLNREALTAERFLDDPFTPGGRMYRTGDLVRYRADGTLDYLGRNDDQVKIR	TTCGAGGCTCAGGCGCTGCGCACACCGGATGCCCGTGCCGTGCAGGCCGGCAACGGTTCACTGAGCTACCGCGAGCTTAACGAGCGCGCCAACCGACTGGCCCACCACTTGCGCGAGCTTGGCGTACAGCCGGATGCCCGTGTGGCGATCTGCGTGGAGCGCAGTGCCGAGCTGGTTGTCGGTTTGCTGGCGATTCTCAAGGCCGGCGGCGCCTACGTGCCGATCGACCCGAACTACCCACTGGAGCGCATTCACTACATGTTGCACGACAGCGCCCCGGCGGCGCTGCTGGTGCACAGCGTGACCGCACACCTGGCCGGCGAGCCGGGCCTGCCGGTGGTCGACCTTGACCGTGATGACGCGTACGCCGCGCACCTGCATAACCCGCAGGTGGCCGAA…	CCC(C)C1NC(=O)C(NC(=O)C(\NC(=O)C(NC(=O)C(CC(C)C)NC(=O)C(CCC(N)=O)NC(=O)C(NC(=O)C(NC(=O)C(CC(C)C)NC(=O)C(CO)NC(=O)C(NC(=O)C(CC(C)C)NC(=O)C(CO)NC(=O)C2CCCN2C(=O)C(\NC(=O)CCCC(O)=O)=C\C)C(C)C)C(C)C)C(C)C)C(C)C)=C\C)C(C)OC(=O)C(CCCCN)NC(=O)C(CCN)NC(=O)C(CCO)NC1=O	['Structure-based inference', 'Mass spectrometry', 'Sequence-based prediction']	['pubmed:24222604']
BGC0001806	NRP	Pseudomonas tolaasii	tolaasin A	nrpspksdomains_APU91751.1_AMP-binding.5	2,4-diaminobutyric acid	dab	FEAQVETTPQAIAVAFGSQRISYAELNRRANRLAHHLIGLGIGPDERVAICAERGDEVLVGLLGVLKAGAAYVPLDPNYPPERLAYMIADSTPSAVLTQRPLQDRLPALAIPSVLLDEPVNGAEHNPVVPGLNARHLAYVIYTSGSTGNPKGVMIEHRGLVNYSLDAARLFGLTPQDTVLQQNTLNFDLSVEEIFPALLAGATLAPSRHVFGTEAARDPAITPTFLHLTAAHWHTLAAEWHHNPQQAQDHLRDVRLINVTGDALSAQKLKLWDESRPAHVRLINTYGPTEATVSCTTAYVSYTGDINGNTTIGKPMANTRIYLLDSRQQPVPFGVAGEIFIGGDGVARGYLNLDVISAERFIADPFSPVPGARMYKTGDLARYLVDGSIEYLGRNDFQV…	TTTGAAGCCCAGGTCGAGACCACACCGCAGGCCATTGCGGTGGCGTTCGGATCGCAGCGCATCAGTTATGCCGAGCTCAACCGCCGGGCCAACCGCCTGGCGCATCACCTGATCGGCCTGGGCATTGGCCCCGACGAGCGCGTGGCGATCTGCGCCGAGCGCGGCGATGAGGTGTTGGTGGGCCTGCTCGGGGTGCTCAAGGCCGGCGCCGCTTATGTGCCGCTGGACCCCAATTACCCGCCGGAGCGCCTGGCTTACATGATCGCCGACAGTACGCCGTCGGCGGTGCTGACCCAGCGTCCGTTGCAGGACCGCCTGCCGGCCCTGGCGATTCCGAGCGTGTTGCTGGATGAACCGGTCAACGGCGCCGAACATAACCCGGTGGTGCCGGGCCTCAAT…	CCC(C)C1NC(=O)C(NC(=O)C(\NC(=O)C(NC(=O)C(CC(C)C)NC(=O)C(CCC(N)=O)NC(=O)C(NC(=O)C(NC(=O)C(CC(C)C)NC(=O)C(CO)NC(=O)C(NC(=O)C(CC(C)C)NC(=O)C(CO)NC(=O)C2CCCN2C(=O)C(\NC(=O)CCCC(O)=O)=C\C)C(C)C)C(C)C)C(C)C)C(C)C)=C\C)C(C)OC(=O)C(CCCCN)NC(=O)C(CCN)NC(=O)C(CCO)NC1=O	['Structure-based inference', 'Mass spectrometry', 'Sequence-based prediction']	['pubmed:24222604']
BGC0001806	NRP	Pseudomonas tolaasii	tolaasin A	nrpspksdomains_APU91751.1_AMP-binding.6	lysine	lys	FEAQVLRNPGAIALEFDGQALSYAELNAQANQLAHHLIALGVQPDDRVAIALERGMQMVVALLATLKAGAAYVPLDPAYPPQRLAFMLGDSAPRVLLSEYAVLPLLGTLAQAMQVVTLNSALQPWRALGTHNPQPAQLGLASEHLAYVLYTSGSTGTPKGVMIEHAGLCNEIQAIRGLTGLGAGDRALQFATINFDASIEEIFGALTCGATLVLRSADWLTDAAQFWSLATQARLSVISLPTRFWQGLADDHSAVIPASVRVVVVGGEELSPEAVQHWFLRSGHTPRLLNTYGPTEATIIATANEVLAANPHPRAIGRPIANTRVYVLDAHGHPTGLGVAGEIHLAGIGIARGYLNQPQLSSERFLADPFSAGPGRLYKTGDLGRWLPDGTLEYLGRND…	TTCGAGGCTCAGGTACTGCGTAACCCCGGCGCGATTGCGCTGGAGTTCGACGGCCAGGCCCTCAGTTACGCCGAGCTCAATGCCCAGGCCAACCAGTTGGCCCATCATTTGATTGCCCTCGGTGTGCAGCCTGACGACCGTGTCGCCATCGCGCTGGAACGCGGGATGCAGATGGTGGTGGCCTTGCTCGCCACCCTCAAGGCCGGTGCTGCGTACGTACCGCTCGACCCGGCTTACCCGCCGCAACGTCTGGCTTTCATGCTCGGCGACAGTGCGCCACGGGTGTTGCTCAGCGAATACGCGGTGCTGCCGCTGCTCGGCACGCTGGCGCAGGCCATGCAGGTGGTGACCTTGAACAGCGCGCTGCAACCCTGGCGCGCGCTGGGCACGCACAACCCG…	CCC(C)C1NC(=O)C(NC(=O)C(\NC(=O)C(NC(=O)C(CC(C)C)NC(=O)C(CCC(N)=O)NC(=O)C(NC(=O)C(NC(=O)C(CC(C)C)NC(=O)C(CO)NC(=O)C(NC(=O)C(CC(C)C)NC(=O)C(CO)NC(=O)C2CCCN2C(=O)C(\NC(=O)CCCC(O)=O)=C\C)C(C)C)C(C)C)C(C)C)C(C)C)=C\C)C(C)OC(=O)C(CCCCN)NC(=O)C(CCN)NC(=O)C(CCO)NC1=O	['Structure-based inference', 'Mass spectrometry', 'Sequence-based prediction']	['pubmed:24222604']
BGC0001842	NRP	Pseudomonas fluorescens Pf0-1	gacamide A	nrpspksdomains_Pfl01_2211_AMP-binding.1	leucine	leu	EAQSAARPDAVAAESLGQQLTYAELNRQANALAHHLIGLGVRPDDRVALVARRGLDTLVALLAILKSGAGYVPVDPAHPAERLSYLLRDSAPAVVLTQRDLRERLPVLDVSLIEIDSRGWPINDLNPDVSGLTSAHLAYVIYTSGSTGQPKGVMVEHHTLSNLVDWHCTAFDLWAGRHASSLAGFGFDAMAWEVWPALCVGATLHLAPSRDGGEDIDALLDWWRAQPLDVSFLPTPIAEYAFSRHVEHPTLRTLLIGGDRLRQFNREQTFAVINNYGPTEATVVATSGRIGPGRTLHIGKPVSNATAYLLDDRQRPVPIGVAGELYVGGAGVARGYFNRPELTAERFLDDPFSRQPNARMYRTGDLARWRPDGTIEYLGRNDDQVKIR	GAAGCGCAATCGGCGGCGCGGCCGGACGCGGTAGCGGCTGAATCCCTGGGACAGCAGCTGACCTATGCCGAGCTGAACCGACAGGCCAACGCCCTGGCCCATCATTTGATCGGGCTCGGCGTGCGACCCGACGACCGTGTGGCGCTGGTCGCCCGACGAGGGCTGGACACGCTGGTCGCGCTGCTGGCGATTCTCAAATCCGGCGCCGGTTACGTGCCGGTCGATCCGGCCCATCCTGCGGAACGCCTGAGCTATTTATTGCGCGACAGTGCTCCGGCCGTGGTCCTGACCCAGCGCGATTTGCGCGAACGCTTGCCGGTGCTGGACGTGTCGCTGATCGAAATCGATTCGCGCGGCTGGCCGATCAACGATCTCAACCCCGACGTCTCGGGGCTGACC…	CCCCCCC[C@@H](O)CC(N[C@H](CC(C)C)C(N[C@H](CC(O)=O)C(N[C@@H](C(N[C@@H]([C@H](C)CC)C(N[C@@H](C(N[C@H](CCC(N)=O)C(N[C@@H](C(N[C@H]1CC(C)C)=O)COC([C@H]([C@H](CC)C)NC([C@@H](CO)NC([C@H](CC(C)C)NC1=O)=O)=O)=O)=O)=O)CC(C)C)=O)=O)CCC(N)=O)=O)=O)=O	['Structure-based inference']	['pubmed:30666877']
BGC0001842	NRP	Pseudomonas fluorescens Pf0-1	gacamide A	nrpspksdomains_Pfl01_2211_AMP-binding.2	aspartic acid	asp	FEQQVQRRPDAIALQAGEQQLTYRQLNEQANRLAHHLREHGVQPDSRVAICVERSLDLVVGLLGILKAGGAYVPLDPDYPLERLHYMLQDSAPVAVLVHDVTRNLLGDPGVPVIDFDRCTWQHASTENLQIPGLSASNLAYMIYTSGSTGTPKGVMIEHRSACNMVHWGSQISPPTEHGALLQKAPFSFDSSVWEIFWPLCSGLRLVLARPDGNRDSAYVTRVIRERQITVVKFVPALLQQFIEQDDASQCTSLTDVLNGGGELTAALARRVRERLPWVRLHNVYGPTETTVDSTGWTLEPDQPVPEAVVPIGKALSNTRLYVLDAHDQPVPFGVSGHLHIGGVGVARGYLGLSQMQAERFIDSPFVAGDRLYRTGDLVRYRADGNLEFLGRNDFQIKLR	TTCGAGCAACAAGTCCAGCGCAGGCCGGACGCCATCGCATTGCAGGCTGGCGAGCAACAACTGACCTATCGCCAATTGAACGAACAGGCCAACCGTCTGGCGCATCATCTACGCGAGCACGGCGTGCAACCCGATTCGCGGGTGGCGATCTGTGTCGAACGCAGCCTGGACCTGGTGGTCGGCCTGCTCGGCATTCTCAAGGCGGGCGGCGCGTACGTGCCGCTGGATCCCGACTATCCGCTGGAACGCCTGCATTACATGCTGCAGGACAGCGCCCCGGTGGCGGTGCTGGTCCATGACGTTACCCGCAATTTGTTGGGCGATCCGGGTGTGCCGGTCATCGATTTCGACCGTTGCACCTGGCAGCACGCGTCGACTGAAAACCTGCAAATACCGGGT…	CCCCCCC[C@@H](O)CC(N[C@H](CC(C)C)C(N[C@H](CC(O)=O)C(N[C@@H](C(N[C@@H]([C@H](C)CC)C(N[C@@H](C(N[C@H](CCC(N)=O)C(N[C@@H](C(N[C@H]1CC(C)C)=O)COC([C@H]([C@H](CC)C)NC([C@@H](CO)NC([C@H](CC(C)C)NC1=O)=O)=O)=O)=O)=O)CC(C)C)=O)=O)CCC(N)=O)=O)=O)=O	['Structure-based inference']	['pubmed:30666877']
BGC0001842	NRP	Pseudomonas fluorescens Pf0-1	gacamide A	nrpspksdomains_Pfl01_2212_AMP-binding.1	glutamine	gln	FEAQVERTPQAVALQSGAQSLTYVELNMRANRLAHRLRELGVGPDTPVAICVERGPELVIGLLGILKAGGAYVPLDPAYPAERLNYMLKDSAPVALLAHGATRALFEAGGVPLLDFDQDHWQDYPEHNPQVPGLNASNLAYVIYTSGSTGTPKGVMVEHRGLGNLLHWSSQVCPPVADGALLQKTPYSFDASVWELFWPLTAGLRLVLARPDAHFEPAYLTQVVQEQRISVIQFVPALLQQFLDVENVSQCTSLTDVFCGGGELTPELGRQVRERLPQVRLHNVYGPTETTVDSSVWTLEPSMPVPEALLPIGRPVSNTRLYILDEQLQPLPLGVAGELYIGGVQVARGYLNLASLTAERFLDDPFSDQPNARLYRTGDLCRYRADGNLEYLGRNDDQV…	TTCGAGGCGCAGGTCGAGCGTACGCCGCAGGCCGTCGCGTTGCAGTCCGGCGCGCAGTCACTGACGTACGTTGAACTCAATATGCGGGCCAATCGCCTGGCTCATCGGTTGCGCGAGTTGGGTGTCGGGCCGGATACGCCGGTGGCGATCTGTGTCGAGCGCGGACCTGAACTGGTGATCGGTCTGCTGGGCATTCTCAAGGCTGGCGGTGCTTACGTGCCGCTGGATCCGGCCTACCCGGCGGAACGCCTGAACTACATGCTCAAGGACAGCGCGCCAGTGGCGCTGCTGGCGCACGGCGCGACCCGAGCGCTGTTCGAGGCGGGCGGCGTGCCGTTGCTCGATTTCGATCAGGATCACTGGCAGGACTATCCCGAGCACAATCCTCAGGTGCCGGGC…	CCCCCCC[C@@H](O)CC(N[C@H](CC(C)C)C(N[C@H](CC(O)=O)C(N[C@@H](C(N[C@@H]([C@H](C)CC)C(N[C@@H](C(N[C@H](CCC(N)=O)C(N[C@@H](C(N[C@H]1CC(C)C)=O)COC([C@H]([C@H](CC)C)NC([C@@H](CO)NC([C@H](CC(C)C)NC1=O)=O)=O)=O)=O)=O)CC(C)C)=O)=O)CCC(N)=O)=O)=O)=O	['Structure-based inference']	['pubmed:30666877']
BGC0001842	NRP	Pseudomonas fluorescens Pf0-1	gacamide A	nrpspksdomains_Pfl01_2212_AMP-binding.2	isoleucine	ile	FELQVKLHPQAVAAVHGNAALTYDELNQRANRLAHFLIGQGVQPGDPVAILLPRSLDLLAAQLAIGKCAAAYVPLDINAPGERQAFMVEDSSAKVLLTLSTETVDYAVRRIDLDSLPLDAQPVHNPGLPQSSESVAYIMYTSGSTGTPKGVMVPHRAIGRLVINNGYADFNPQDRVAFASNPAFDASTMDVWGPLLNGGRVVVIDHATLLDPQAFGRELANTGATILFVTTALFNQYVQLIPEALKGLRIVLCGGERADPAAFRRLLAEAPDLRIIHCYGPTETTTYATTFEVREVSETAESVPIGGPISNTQVYVLDARQQPVPMGVTGELYIGGQGVALGYLSRPDLTAEKFLQDPFSEQPGALLYRTGDLARWLAPGQLECIGRNDDQVKIR	TTCGAACTGCAAGTGAAACTGCATCCGCAAGCCGTGGCGGCGGTGCATGGCAACGCGGCGTTGACCTATGACGAGCTGAATCAACGGGCCAACCGACTGGCCCACTTTCTGATCGGGCAGGGCGTGCAACCGGGCGACCCTGTGGCGATTCTGCTGCCGCGTTCGCTGGATCTGCTGGCTGCGCAACTGGCCATCGGCAAGTGCGCGGCGGCTTATGTGCCGCTGGATATCAACGCTCCGGGCGAGCGTCAGGCGTTCATGGTTGAGGACAGCTCGGCGAAAGTGCTGTTGACCTTGAGCACTGAAACGGTTGATTACGCGGTGCGCCGTATCGATCTGGATTCGCTGCCGCTGGACGCGCAACCGGTCCACAACCCGGGCTTGCCGCAGTCCTCCGAA…	CCCCCCC[C@@H](O)CC(N[C@H](CC(C)C)C(N[C@H](CC(O)=O)C(N[C@@H](C(N[C@@H]([C@H](C)CC)C(N[C@@H](C(N[C@H](CCC(N)=O)C(N[C@@H](C(N[C@H]1CC(C)C)=O)COC([C@H]([C@H](CC)C)NC([C@@H](CO)NC([C@H](CC(C)C)NC1=O)=O)=O)=O)=O)=O)CC(C)C)=O)=O)CCC(N)=O)=O)=O)=O	['Structure-based inference']	['pubmed:30666877']
BGC0001842	NRP	Pseudomonas fluorescens Pf0-1	gacamide A	nrpspksdomains_Pfl01_2212_AMP-binding.3	leucine	leu	EVQAERNPHALAVIQGAQQLTYGQLNQRANRLAHHLIGLGVQPDDRVALCVRRGPQMLVGLLAILKAGAGYVPVDPAHPAERIAYLLQDSDPVAVLAQASTRELLGMMPVIDLDSDAWQHLPDSNPQLPYLTPANLAYVIYTSGSTGQPKGVMVEHATLENLVHWHAEAFDLHAGSHTASVAGFGFDAMAWEVWPALCVGATLHLPPETVSNEHLDELLDWWRAQPLQVSFLPTPVAEYAFSRELQHPTLRTLLIGGDKLRQFNRAQTFAVINNYGPTEATVVATSGLVEVGQPLHIGRPMANARIYLLDDQQRPVPVGVTGEMYVAGAGVARGYLNRPDLTAERFLTDPFSDQPQARMYRTGDLARWLADGNIEYLGRNDDQVKLR	GAGGTGCAGGCCGAGCGCAACCCGCATGCCCTCGCCGTGATTCAAGGTGCGCAACAGCTGACCTACGGGCAGCTCAACCAGCGTGCCAACCGACTGGCCCATCATTTGATCGGTCTAGGCGTGCAACCGGACGACCGCGTCGCGCTCTGCGTGCGTCGTGGCCCGCAGATGCTGGTCGGCCTGCTGGCGATTCTCAAGGCCGGCGCCGGTTATGTGCCGGTGGATCCTGCGCATCCGGCGGAACGCATTGCCTACCTGTTGCAGGACAGCGATCCGGTGGCCGTGCTCGCACAGGCTTCGACCCGGGAGCTGCTGGGCATGATGCCGGTGATCGATCTGGACAGCGACGCCTGGCAACACCTGCCCGACAGCAACCCGCAACTGCCGTACCTGACTCCG…	CCCCCCC[C@@H](O)CC(N[C@H](CC(C)C)C(N[C@H](CC(O)=O)C(N[C@@H](C(N[C@@H]([C@H](C)CC)C(N[C@@H](C(N[C@H](CCC(N)=O)C(N[C@@H](C(N[C@H]1CC(C)C)=O)COC([C@H]([C@H](CC)C)NC([C@@H](CO)NC([C@H](CC(C)C)NC1=O)=O)=O)=O)=O)=O)CC(C)C)=O)=O)CCC(N)=O)=O)=O)=O	['Structure-based inference']	['pubmed:30666877']
BGC0001842	NRP	Pseudomonas fluorescens Pf0-1	gacamide A	nrpspksdomains_Pfl01_2212_AMP-binding.4	glutamine	gln	FEAQVQRTPQAIALQAGEQRLTYAELNAQANRLAHHLRELGVGPDSRVAISVERGLELMVGLLGILKAGGAYVPLDPAYPAERLDYMLKDSAPVAVLVHGATRELLDESTALVIDLDQAHWTFNPDDNPQVLGLSASNLAYVIYTSGSTGAPKGVMVEHRGVGNLLHWSSQLCPAVTDGALLQKTPFSFDASVWELFWPLSAGLRLVLARPDGHREPAYLAQVIREQRVSVIQFVPVLLQQFLEQDDVSQCSSLTDVFCGGGDLTPALARLVRERLPQVRLHNVYGPTEATVDSTVWTLEPSMAVPDSALPIGRPINNTRLYVLDAAKRPVPMGVIGQLFIGGAGVARGYLGLPQLMAERFTPSPFVAGDRLYATGDLVRYRADGQLEFIGRNDFQVKLR	TTCGAGGCGCAAGTGCAGCGCACGCCTCAAGCCATCGCGTTGCAGGCCGGTGAACAGCGGCTGACCTACGCCGAACTCAACGCACAGGCCAATCGACTGGCCCATCATCTGCGCGAACTGGGCGTGGGGCCGGATTCGCGGGTGGCGATCAGCGTCGAGCGCGGGCTGGAGCTGATGGTCGGTCTGCTCGGCATCCTCAAGGCGGGCGGTGCCTATGTGCCGCTGGATCCGGCGTACCCGGCAGAGCGTCTGGATTACATGCTCAAGGACAGCGCGCCGGTAGCGGTGCTGGTGCACGGTGCGACGCGTGAGTTGCTGGATGAGAGCACCGCGCTGGTGATCGATCTGGATCAGGCTCATTGGACATTCAACCCGGATGACAACCCGCAAGTGCTGGGC…	CCCCCCC[C@@H](O)CC(N[C@H](CC(C)C)C(N[C@H](CC(O)=O)C(N[C@@H](C(N[C@@H]([C@H](C)CC)C(N[C@@H](C(N[C@H](CCC(N)=O)C(N[C@@H](C(N[C@H]1CC(C)C)=O)COC([C@H]([C@H](CC)C)NC([C@@H](CO)NC([C@H](CC(C)C)NC1=O)=O)=O)=O)=O)=O)CC(C)C)=O)=O)CCC(N)=O)=O)=O)=O	['Structure-based inference']	['pubmed:30666877']
BGC0001842	NRP	Pseudomonas fluorescens Pf0-1	gacamide A	nrpspksdomains_Pfl01_2212_AMP-binding.5	serine	ser	FEAQVLRTPQAVAVLSGEQRLSYAELNARANRLAHHLRGLGVGPDARVAICVERGLDMVVGLLAILKAGGGYVPLDPAYPLERLAYMLKDSAPSAVLVQGSTRALLGEVAVPVVDLDHDTWQSLSADNPSVDGLTPQHTAYVIYTSGSTGQPKGVINEHSGVVNRLLWMQDAYRLTAEDSVLQKTPFSFDVSVWEFFWPLMTGARLVMARPGGHKDPLYLSEVIEQQQITTLHFVPSMLDVFLAHGDTARCSALRQVMCSGEALPGSLVRRFKQQLPGSGLHNLYGPTEAAVDVTAWDCAGPIETTPDNTPIGKPIANTRLYILDAQQQPVPQGVVGELYIGGVQVARGYLNRPELSAERFLNDPFKPNGRMYRTGDVARYLADGNIEYLGRNDDQVKIR	TTCGAGGCGCAGGTCTTGCGCACGCCGCAGGCTGTGGCGGTGCTTTCCGGTGAACAGCGACTGAGTTATGCCGAGCTGAATGCTCGGGCCAACCGTCTGGCCCATCACCTGCGCGGTTTGGGCGTGGGCCCGGATGCGCGGGTGGCGATCTGTGTCGAGCGTGGGCTGGACATGGTGGTCGGGCTGCTGGCGATCCTGAAGGCCGGCGGCGGTTATGTGCCGCTGGATCCGGCGTATCCGCTGGAGCGTCTGGCTTACATGCTGAAGGACAGCGCGCCGTCGGCGGTGTTGGTGCAGGGCTCGACTCGCGCCTTGCTGGGTGAGGTGGCGGTGCCGGTAGTCGATCTGGATCACGACACTTGGCAATCATTGTCGGCTGATAACCCTTCGGTCGATGGG…	CCCCCCC[C@@H](O)CC(N[C@H](CC(C)C)C(N[C@H](CC(O)=O)C(N[C@@H](C(N[C@@H]([C@H](C)CC)C(N[C@@H](C(N[C@H](CCC(N)=O)C(N[C@@H](C(N[C@H]1CC(C)C)=O)COC([C@H]([C@H](CC)C)NC([C@@H](CO)NC([C@H](CC(C)C)NC1=O)=O)=O)=O)=O)=O)CC(C)C)=O)=O)CCC(N)=O)=O)=O)=O	['Structure-based inference']	['pubmed:30666877']
BGC0001842	NRP	Pseudomonas fluorescens Pf0-1	gacamide A	nrpspksdomains_Pfl01_2213_AMP-binding.1	leucine	leu	FEAQVIERPEAVAAVFLGEHVTYAELNLHANALAHHLISLGVRPDDRVAIVARRELDTLAGLLAILKAGAGYVPLDPAHPAERLSYLLSDSAPVVVLTQSDLRDRLPTLDVPVIDLDRHTWPLSLALDPRVPGLTNEHLAYVIYTSGSTGLPKGVMVEHRTLSNLIDWHCGAFDLCAGRHTSSLAGFGFDAMAWEVWPALCAGATLHLAPTRDGNEDIDALLDWWRAQPLDVSFLPTPVAEYAFSQNLEHPTLRTLLIGGDRLRQFSRHQHFDVINNYGPTEATVVATSGKVDAGQALHIGRPVSNATVYLLDEQQRPVPIGVAGELYVGGAGVARGYLNRPELTAERFLDDPFNSGRMYRTGDLARWQSDGTLEYLGRNDDQVKIR	TTCGAGGCGCAAGTCATCGAACGGCCGGAAGCGGTGGCGGCAGTGTTCCTCGGTGAACACGTGACCTATGCCGAGCTGAACCTGCACGCCAACGCCCTGGCCCATCATCTGATCAGCCTGGGCGTTCGCCCCGATGATCGCGTGGCCATCGTCGCTCGACGCGAGCTCGACACGCTGGCCGGACTGCTGGCGATTCTCAAGGCCGGGGCCGGTTACGTGCCGCTCGACCCGGCGCATCCGGCCGAGCGCCTGAGCTACCTGCTCAGCGACAGCGCCCCGGTGGTGGTGCTGACCCAGAGTGATCTGCGTGATCGGTTGCCGACACTGGACGTCCCGGTGATCGACCTCGACCGCCATACCTGGCCGCTGAGCCTGGCCCTCGACCCGCGGGTGCCGGGA…	CCCCCCC[C@@H](O)CC(N[C@H](CC(C)C)C(N[C@H](CC(O)=O)C(N[C@@H](C(N[C@@H]([C@H](C)CC)C(N[C@@H](C(N[C@H](CCC(N)=O)C(N[C@@H](C(N[C@H]1CC(C)C)=O)COC([C@H]([C@H](CC)C)NC([C@@H](CO)NC([C@H](CC(C)C)NC1=O)=O)=O)=O)=O)=O)CC(C)C)=O)=O)CCC(N)=O)=O)=O)=O	['Structure-based inference']	['pubmed:30666877']
BGC0001842	NRP	Pseudomonas fluorescens Pf0-1	gacamide A	nrpspksdomains_Pfl01_2213_AMP-binding.2	leucine	leu	FEAQVIERPEAVAAVCQGQALTFAELNRQANTLTHHLIGLGVRADDRVAIVARRGLDTLIGLVAILKAGAGYVPVDPAHPAERLNYLLSDSAPVAVLCLSDLRERLPALDVPVIDLDLQGWPDTEPSNPQVPGLTSEHLAYVIYTSGSTGLPKGVMVEHHTLSNLVDWHCRAFDLCAGRHTSSLAGFGFDAMAWEVWPALCAGATLHLAPARDGSEDVDALLDWWCAQPLDVSFLPTPVAEYAFSQNLEHPTLRTLLIGGDRLRQFNRQQSFDVVNNYGPTEATVVATSGIVEAGQALHIGKPIANATVYLLDEQLRPVPVGVAGELYAGGVGVARGYLNRPDLTEERFVNDPFNHGRMYRTGDLARWRADGSIEYLGRNDDQVKIR	TTCGAAGCGCAAGTGATCGAGCGACCCGAAGCGGTTGCGGCAGTCTGCCAGGGGCAGGCGTTGACCTTTGCCGAGCTGAACCGACAGGCCAATACCCTGACTCATCACCTGATCGGGCTGGGTGTTCGCGCCGATGATCGGGTGGCCATCGTTGCCCGGCGCGGGCTCGATACGCTGATCGGGCTGGTGGCCATTCTCAAGGCTGGCGCCGGTTACGTGCCGGTGGATCCAGCGCACCCGGCGGAGCGTTTGAACTATCTGCTGAGCGACAGTGCGCCAGTGGCCGTGTTGTGCCTGAGTGATTTGCGTGAACGCCTGCCGGCGCTCGATGTACCGGTGATCGACCTCGATTTGCAGGGCTGGCCGGACACCGAACCCAGCAATCCGCAGGTGCCGGGC…	CCCCCCC[C@@H](O)CC(N[C@H](CC(C)C)C(N[C@H](CC(O)=O)C(N[C@@H](C(N[C@@H]([C@H](C)CC)C(N[C@@H](C(N[C@H](CCC(N)=O)C(N[C@@H](C(N[C@H]1CC(C)C)=O)COC([C@H]([C@H](CC)C)NC([C@@H](CO)NC([C@H](CC(C)C)NC1=O)=O)=O)=O)=O)=O)CC(C)C)=O)=O)CCC(N)=O)=O)=O)=O	['Structure-based inference']	['pubmed:30666877']
BGC0001842	NRP	Pseudomonas fluorescens Pf0-1	gacamide A	nrpspksdomains_Pfl01_2213_AMP-binding.3	serine	ser	FEAQVLRSPQAVAVLSGEQRLSYAELNARANRLAHHLRGLGVGPDARVAICVERGLDMVVGLLAILKAGGGYVPLDPAYPLERLAYMLKDSAPSAVLVQGSTRALLGEVAVPVVNLDHDIWQALSVDNLAVDGLTPQHTAYVIYTSGSTGQPKGVINEHSGVVNRLLWMQDAYRLTAEDSVLQKTPFSFDVSVWEFFWPLMTGARLVMARPGGHKDPLYLSEVIEQQQITTLHFVPSMLDVFLAHGETARCHGLRQVMCSGEALPGSLVRRFKQQLPGSGLHNLYGPTEAAVDVTAWDCAGPIETTPDNTPIGKPIANTRLYILDAQQQPVPQGVVGELYIGGVQVARGYLNRPELSAERFLNDPFKPNGRMYRTGDVARYLADGNIEYLGRNDDQVKIR	TTCGAGGCGCAGGTTTTGCGGTCGCCGCAGGCTGTGGCGGTGCTTTCCGGTGAACAGCGACTGAGTTATGCCGAGCTGAATGCTCGGGCCAATCGTCTGGCCCATCACCTGCGTGGTTTGGGCGTGGGCCCGGATGCGCGGGTGGCGATCTGTGTCGAGCGTGGGCTGGACATGGTGGTCGGGCTGCTGGCGATCCTGAAGGCCGGCGGCGGTTATGTGCCGCTGGATCCGGCGTATCCGCTGGAGCGTCTGGCTTACATGCTGAAGGACAGCGCGCCGTCGGCGGTGTTGGTGCAGGGCTCGACTCGCGCCTTGCTGGGTGAGGTGGCGGTGCCGGTGGTCAATCTGGATCACGACATCTGGCAAGCGTTGTCGGTCGATAACTTGGCGGTCGATGGG…	CCCCCCC[C@@H](O)CC(N[C@H](CC(C)C)C(N[C@H](CC(O)=O)C(N[C@@H](C(N[C@@H]([C@H](C)CC)C(N[C@@H](C(N[C@H](CCC(N)=O)C(N[C@@H](C(N[C@H]1CC(C)C)=O)COC([C@H]([C@H](CC)C)NC([C@@H](CO)NC([C@H](CC(C)C)NC1=O)=O)=O)=O)=O)=O)CC(C)C)=O)=O)CCC(N)=O)=O)=O)=O	['Structure-based inference']	['pubmed:30666877']
BGC0001842	NRP	Pseudomonas fluorescens Pf0-1	gacamide A	nrpspksdomains_Pfl01_2213_AMP-binding.4	isoleucine	ile	FEQQVTKHPQAVSAVHGAQSLSYFELNERANRLAHHLIGQGVQPGDPVAILLPRSLDLLIAQLAIGKCAAAYVPLDINAPAERQAFMVEDCGAKALLTFSTETVDYAVRRIDLDALKLDAQPPHNPDLPQSSESVAYIMYTSGSTGTPKGVMVPHRAIGRLVINNGYADFNPQDRVAFASNPAFDASTMDVWGPLLNGGRVVVIDHATLLDPHAFGQELAASGATILFVTTALFNQYVQLIPEALKGLRIVLCGGERADPAAFRRLLAEAPELRIIHCYGPTETTTYATTFEVREVSETAESVPIGGPISNTQVYVLDARQQPVPMGVIGELYIGGQGVALGYLNRPDLTAEKFLQDPFGDQPGALLYRTGDLARWLAPGQLECIGRNDDQVKIR	TTCGAACAGCAGGTGACGAAGCATCCGCAAGCGGTGTCAGCGGTGCATGGTGCGCAATCGCTGAGCTACTTTGAGTTGAATGAGCGGGCCAATCGTCTGGCCCATCACTTGATCGGCCAAGGTGTTCAACCGGGCGATCCTGTGGCGATTCTTCTGCCGCGTTCGCTGGATCTGCTGATCGCGCAACTGGCCATCGGAAAATGTGCGGCGGCTTATGTGCCGCTGGACATCAACGCCCCGGCCGAGCGTCAGGCGTTCATGGTCGAGGACTGTGGGGCGAAAGCGCTGCTGACCTTCAGCACTGAGACGGTTGATTACGCCGTGCGCCGGATCGACCTCGATGCGCTGAAACTCGATGCGCAACCGCCGCACAATCCGGACCTGCCGCAGTCTTCGGAA…	CCCCCCC[C@@H](O)CC(N[C@H](CC(C)C)C(N[C@H](CC(O)=O)C(N[C@@H](C(N[C@@H]([C@H](C)CC)C(N[C@@H](C(N[C@H](CCC(N)=O)C(N[C@@H](C(N[C@H]1CC(C)C)=O)COC([C@H]([C@H](CC)C)NC([C@@H](CO)NC([C@H](CC(C)C)NC1=O)=O)=O)=O)=O)=O)CC(C)C)=O)=O)CCC(N)=O)=O)=O)=O	['Structure-based inference']	['pubmed:30666877']
BGC0001980	NRP	Pseudomonas sp.	lokisin	nrpspksdomains_lokA_AMP-binding.1	leucine	leu	EAQATLRPQALAAVEQGQGLTYAELNQRANALAHHLLDLGVRPDDRVAIVARRGLDTLVGLLAILKAGAAYVPLDPAHPAERLSYLLEDSAPIAVLTQRALRGHLPALSVPVIELDQPSWSAGRVDAPKVPGLTPANLAYVIYTSGSTGLPKGVMVEHRTLCNLVDWHADVFDLHAGSHTSSLAGFGFDAMAWEVWPALCVGATLHLAPASEGSEDIDALLDWWRAQPLDVSFLPTPIAEYAFSRQLDHPTLRTLLIGGDRLRQFPRQPSFEVINNYGPTEATVVATSGRIDAGQALHIGKPVSNATVYLLDEQQQPVPLGVTGELYVGGAGVARGYLHRAELSAERFLRDPFSAEPGARMYRTGDLALWRADGNLEYLGRNDDQVKVR	GAAGCGCAGGCGACGCTGCGGCCGCAGGCGCTGGCGGCGGTTGAGCAAGGGCAAGGCCTGACCTATGCCGAGCTCAATCAACGCGCCAACGCGCTGGCGCATCATCTGCTGGATCTCGGGGTGCGCCCGGATGACCGGGTGGCGATCGTTGCCCGGCGCGGCCTCGACACGCTGGTCGGACTGTTGGCGATCCTCAAGGCTGGCGCCGCGTATGTACCGCTGGATCCGGCGCATCCAGCCGAGCGCCTGAGCTACCTGCTGGAGGACAGCGCGCCCATCGCGGTGCTGACCCAGCGCGCGCTGCGCGGGCATTTGCCGGCGTTGTCGGTGCCGGTGATCGAGCTGGATCAGCCGAGTTGGTCGGCTGGCCGGGTCGACGCGCCGAAGGTGCCGGGGCTG…	CCCCCCC[C@H](CC(=O)N[C@H](CC(C)C)C(=O)N[C@H](CC(=O)O)C(=O)N[C@@H]1[C@H](OC(=O)[C@@H](NC(=O)[C@H](NC(=O)C(NC(=O)[C@H](NC(=O)[C@H](NC(=O)[C@@H](NC(=O)[C@@H](NC(=O)[C@@H](NC1=O)CC(C)C)CC(C)C)CO)CC(C)C)CO)CC(C)C)[C@H](C)CC)CC(=O)O)C)O	['Structure-based inference']	['pubmed:31354771']
BGC0001980	NRP	Pseudomonas sp.	lokisin	nrpspksdomains_lokA_AMP-binding.2	aspartic acid	asp	FEAQVRRKPYAIAAQAGEQSLTYEQLNDRANRLAHHLRELGVQPDSRVAICVERGLDLVVGLLGVLKAGGAYVPLDPDYPLERLNYMLQDSAPVALLVHDATRQLLGEPSVPLINLDHGSWEPQPSDNLQVPGLSASNLAYMIYTSGSTGLPKGVMIEHRSACNMVHWGSQLSPPTEHGALLQKAPFSFDSSVWEIFWPLCSGMRLVLARPDGNRDSAYVVQTIREHQVTVVKFVPALLQQFIEQDGVEQCTSLTDVLNGGGELSAALARQVRDRLPWVRLHNVYGPTETTVDSTGWTLEPHMPVPENVVPIGKALSNTRLYVLDAYGQPVPQGISGELHIGGVGVARGYHGLPEMQAERFINSPFVAGDRLYRTGDLARYNNHGELEFLGRNDFQIKLR	TTCGAAGCGCAGGTGCGGCGCAAACCGTATGCAATCGCCGCACAGGCCGGCGAGCAAAGCCTGACCTATGAGCAACTCAATGATCGCGCCAACCGTCTGGCCCATCACCTGCGTGAACTCGGCGTGCAACCGGACTCGCGCGTAGCGATCTGCGTCGAACGCGGGCTGGATCTGGTGGTCGGTCTGCTGGGGGTTCTCAAGGCTGGCGGCGCCTATGTGCCGCTGGATCCGGACTATCCGCTGGAGCGTCTGAACTACATGTTGCAGGACAGCGCGCCGGTCGCACTGCTGGTGCATGACGCCACGCGGCAATTGCTCGGCGAACCGAGTGTGCCGCTGATCAATCTGGATCACGGCAGTTGGGAGCCGCAGCCGTCAGACAATCTGCAGGTGCCGGGC…	CCCCCCC[C@H](CC(=O)N[C@H](CC(C)C)C(=O)N[C@H](CC(=O)O)C(=O)N[C@@H]1[C@H](OC(=O)[C@@H](NC(=O)[C@H](NC(=O)C(NC(=O)[C@H](NC(=O)[C@H](NC(=O)[C@@H](NC(=O)[C@@H](NC(=O)[C@@H](NC1=O)CC(C)C)CC(C)C)CO)CC(C)C)CO)CC(C)C)[C@H](C)CC)CC(=O)O)C)O	['Structure-based inference']	['pubmed:31354771']
BGC0001980	NRP	Pseudomonas sp.	lokisin	nrpspksdomains_lokB_AMP-binding.1	threonine	thr	FEAHAAARPEATALLFEEQTLSYGELNRRANQLAHHLLARGIRPDQRVAICVERGPQMLIGLLGILKAGAGYVPIDPVYPLERIAYTLEDSAPVAVLTQADTLDRVGALGVPIIDLDSLQLQAELGSNPQIPELTPSHLAYVIYTSGSTGLPKGVMVEHRNVVRLFSATHDWFNFNPQDVWALFHSFAFDFSVWEIWGALAFGGQLLLVPQAVSRSPDDCYALLCRSGVTVLNQTPSAFRQLIAAQGRSPLQHSLREVIFGGEALEPGLLKPWYARVGNAGTRLVNMYGITETTVHVTYRPLEAADALLVGRSPIGVGIPDLQLYVLDAQREPVPVGVIGELYVGGAGVARGYLNREALTAERFIADPFSGRAEARLYKTGDLARWTDDGSLEYLGRND…	TTCGAAGCCCACGCGGCGGCGCGTCCAGAGGCCACAGCGCTGCTGTTCGAGGAGCAGACGCTGAGCTATGGCGAACTCAATCGCCGCGCCAATCAACTTGCGCATCACCTGCTGGCGCGGGGCATTCGTCCGGATCAGCGCGTGGCGATCTGTGTCGAGCGCGGCCCGCAAATGCTCATCGGCCTGCTTGGTATCCTCAAGGCTGGCGCCGGTTACGTGCCGATCGACCCGGTGTATCCACTGGAGCGCATCGCCTACACCCTGGAGGACAGCGCCCCGGTGGCGGTGCTGACCCAGGCCGATACGCTGGACCGGGTTGGCGCGCTTGGCGTGCCAATCATTGATCTGGACAGCCTGCAGTTGCAGGCTGAACTCGGCAGCAATCCGCAGATCCCCGAG…	CCCCCCC[C@H](CC(=O)N[C@H](CC(C)C)C(=O)N[C@H](CC(=O)O)C(=O)N[C@@H]1[C@H](OC(=O)[C@@H](NC(=O)[C@H](NC(=O)C(NC(=O)[C@H](NC(=O)[C@H](NC(=O)[C@@H](NC(=O)[C@@H](NC(=O)[C@@H](NC1=O)CC(C)C)CC(C)C)CO)CC(C)C)CO)CC(C)C)[C@H](C)CC)CC(=O)O)C)O	['Structure-based inference']	['pubmed:31354771']
BGC0001980	NRP	Pseudomonas sp.	lokisin	nrpspksdomains_lokB_AMP-binding.2	leucine	leu	EAQAAAHPEALAAVQGAQQLRYGELNQRANRLAHHLIGLGVQPDDRVALCARRSPDMLVALLAILKAGAGYVPVDPAYPPERIAYLLQDCAPVAVVAQASTRDLLGGVPVIDLDNDLWQHLSDANPQVPALTPKHLAYVIYTSGSTGQPKGVMVEHATLENLVHWHAEAFDLQAGSQTASVAGFGFDAMAWEVWPALCVGATLHLPPPSIRNEHLDELLDWWCAQPLQVSFLPTPVAEYAFSRQLQHPTLRTLLIGGDRLRQFSRAQTFDVINNYGPTEATVVATSGRVELDQPLHIGRPIANAKIYVLDAEQRPVPVGVAGELYVGGAGVARGYLNRPELTAAQFLFDPFSDEPQARMYRTGDQARWLADGNIEYLGRNDDQVKLR	GAGGCCCAGGCGGCCGCGCACCCCGAGGCCTTGGCGGCTGTGCAAGGTGCCCAGCAGTTGCGCTATGGCGAACTCAATCAGCGGGCCAATCGCCTGGCGCATCACCTGATCGGCCTTGGCGTGCAACCCGATGACCGGGTCGCCCTGTGTGCCCGGCGCAGCCCGGACATGCTGGTCGCGCTGCTGGCGATCCTCAAGGCCGGCGCCGGTTATGTGCCGGTCGATCCGGCGTATCCGCCGGAACGCATCGCCTACCTGTTGCAGGACTGTGCCCCGGTGGCGGTCGTGGCGCAGGCATCGACTCGCGATCTGCTCGGTGGCGTGCCGGTCATCGATCTGGACAACGACCTCTGGCAGCACCTGTCGGATGCCAATCCGCAGGTGCCGGCATTAACCCCG…	CCCCCCC[C@H](CC(=O)N[C@H](CC(C)C)C(=O)N[C@H](CC(=O)O)C(=O)N[C@@H]1[C@H](OC(=O)[C@@H](NC(=O)[C@H](NC(=O)C(NC(=O)[C@H](NC(=O)[C@H](NC(=O)[C@@H](NC(=O)[C@@H](NC(=O)[C@@H](NC1=O)CC(C)C)CC(C)C)CO)CC(C)C)CO)CC(C)C)[C@H](C)CC)CC(=O)O)C)O	['Structure-based inference']	['pubmed:31354771']
BGC0001980	NRP	Pseudomonas sp.	lokisin	nrpspksdomains_lokB_AMP-binding.3	leucine	leu	QVQAEQQPQALAVVQGTQQLTYAQLNQQANRLAHHLLGLGVQPDDRIAVCLQRSPQMLVALLAILKAGAGYVPVDPAYPAERIAYLLQDSDPVAVLAQGSTRELLGRVPVIDLDNALWQHLPATNPQLPTLTPAHLAYVIYTSGSTGQPKGVMVEHATLENLVHWHCEAFDLRAGSHTASVAGCGFDAMAWEVWPALCVGATLHLPPPSISNEHLDELLDWWRAQPLQVSFLPTPIAEYAFSRELGHPTLRTLLIGGDKLRQFSREQTFAVINNYGPTEATVVATSGQIHAGQLLHIGRPISNARIYLLDEQQRPAPVGVAGELYVGGAGVARGYLNRPELTAERFLEDPFSDEPQARMYRTGDLARWLADGNIEYLGRNDDQVKLR	CAAGTGCAGGCCGAGCAGCAGCCACAGGCACTGGCGGTGGTGCAGGGCACGCAGCAACTGACCTACGCGCAGCTCAATCAGCAGGCCAATCGCCTGGCCCATCACTTGCTCGGCCTCGGCGTGCAACCGGACGACCGGATTGCCGTGTGCCTGCAACGCAGCCCGCAGATGCTGGTGGCGCTGCTGGCGATTCTCAAGGCCGGCGCCGGTTATGTGCCGGTCGATCCGGCGTACCCGGCCGAACGCATTGCCTACCTGTTGCAGGACAGCGATCCGGTGGCGGTGCTGGCGCAGGGCTCGACCCGCGAGTTGCTGGGCCGGGTGCCGGTGATCGATCTGGACAACGCCCTCTGGCAACACCTGCCGGCTACCAATCCGCAACTGCCGACGCTGACCCCG…	CCCCCCC[C@H](CC(=O)N[C@H](CC(C)C)C(=O)N[C@H](CC(=O)O)C(=O)N[C@@H]1[C@H](OC(=O)[C@@H](NC(=O)[C@H](NC(=O)C(NC(=O)[C@H](NC(=O)[C@H](NC(=O)[C@@H](NC(=O)[C@@H](NC(=O)[C@@H](NC1=O)CC(C)C)CC(C)C)CO)CC(C)C)CO)CC(C)C)[C@H](C)CC)CC(=O)O)C)O	['Structure-based inference']	['pubmed:31354771']
BGC0001980	NRP	Pseudomonas sp.	lokisin	nrpspksdomains_lokB_AMP-binding.4	serine	ser	FEAQVARSPLAPAVVAGEQQLSYTELNARANQLARHLRELGVGPDARVALCVERGQDMVIGLLAILKAGSGYVPLDPAYPLERLAYMLEDSAPLAVLVQGSTRLLLGEVAVPVIDLDQPHWQSLPTDNLSLAELTPQHTAYVIYTSGSTGQPKGVINEHSGVVNRLLWMQDAYQLTASDTVLQKTPFSFDVSVWEFFWPLMTGARLVMARPEGHKDPQYLSEIIEREHITTLHFVPSMLDVFLAHGDSARCSSLRQVMCSGEALPGSVVRRFKQQLPASQLHNLYGPTEAAVDVTAWNCAGPLEYTPDNTPIGKPIANTRMYILDAQQQPVPHGVVGELYIGGVQVARGYLNRPELNAERFLNDPFQNNGRMYRTGDVARYLPDGNIEYLGRNDDQVKIR	TTCGAGGCGCAAGTGGCGCGCTCGCCGCTGGCACCAGCGGTGGTCGCGGGTGAGCAGCAATTGAGCTACACCGAACTCAACGCCCGAGCCAATCAATTGGCGCGGCACCTGCGCGAATTGGGCGTAGGGCCGGATGCGCGGGTGGCGCTCTGCGTCGAACGCGGTCAGGACATGGTGATCGGGCTGTTGGCGATCCTTAAGGCCGGCAGCGGTTATGTGCCGCTGGACCCGGCGTATCCGCTGGAACGTCTGGCCTACATGCTGGAGGACAGCGCGCCGCTGGCTGTGCTGGTGCAGGGTTCGACGCGTTTGTTGCTCGGCGAAGTCGCGGTGCCGGTGATTGATCTGGATCAGCCGCACTGGCAGTCGCTGCCAACGGACAATCTGTCGCTCGCTGAA…	CCCCCCC[C@H](CC(=O)N[C@H](CC(C)C)C(=O)N[C@H](CC(=O)O)C(=O)N[C@@H]1[C@H](OC(=O)[C@@H](NC(=O)[C@H](NC(=O)C(NC(=O)[C@H](NC(=O)[C@H](NC(=O)[C@@H](NC(=O)[C@@H](NC(=O)[C@@H](NC1=O)CC(C)C)CC(C)C)CO)CC(C)C)CO)CC(C)C)[C@H](C)CC)CC(=O)O)C)O	['Structure-based inference']	['pubmed:31354771']
BGC0001980	NRP	Pseudomonas sp.	lokisin	nrpspksdomains_lokC_AMP-binding.1	leucine	leu	FEAQVAERPDALAAVFADAQLTYAELNQQANALAQHLIGLGVKPDDRVAIVARRGLDTLVGLVAILKAGAGYVPIDPAHPAERLNYLLDDSAPVAVLTQSHLRERLPALNVPVLDLDHCNWPLTVTQNPQVPGLSTAHLAYVIYTSGSTGLPKGVMVEHQTLSNLVDWHCSAFDLCAGRHTSSLAGFGFDAMAWEVWPALCAGATLHLAPTHEGGEDIDALLAWWCAQPLDVSFLPTPVAEYAFSQNLEHPTLRTLLIGGDRLRQFNRNQHFDVINNYGPTEATVVATSGLVQSGDALHIGKPLSNATVYLLDEQQRPVPLGVAGELYVGGAGVARGYLNRPDMTAERFLRDPFSPLPNARMYRTGDLARWREDGNIEYLGRNDDQVKIR	TTCGAGGCACAGGTAGCCGAACGGCCGGACGCGCTGGCGGCAGTGTTTGCCGATGCGCAATTGACCTACGCCGAACTCAATCAGCAGGCCAACGCCTTGGCGCAGCACCTGATCGGCTTGGGTGTGAAGCCGGATGATCGCGTGGCGATCGTCGCCCGCCGTGGGCTGGACACCCTGGTCGGGCTGGTGGCGATCCTCAAGGCCGGCGCCGGTTACGTGCCGATTGATCCGGCGCATCCGGCGGAGCGCTTGAACTACCTGCTCGACGACAGCGCGCCAGTCGCCGTACTGACCCAAAGTCATCTGCGCGAGCGACTGCCGGCGCTAAACGTGCCGGTGCTCGACCTCGATCACTGCAACTGGCCGCTGACGGTTACGCAAAACCCGCAGGTACCGGGC…	CCCCCCC[C@H](CC(=O)N[C@H](CC(C)C)C(=O)N[C@H](CC(=O)O)C(=O)N[C@@H]1[C@H](OC(=O)[C@@H](NC(=O)[C@H](NC(=O)C(NC(=O)[C@H](NC(=O)[C@H](NC(=O)[C@@H](NC(=O)[C@@H](NC(=O)[C@@H](NC1=O)CC(C)C)CC(C)C)CO)CC(C)C)CO)CC(C)C)[C@H](C)CC)CC(=O)O)C)O	['Structure-based inference']	['pubmed:31354771']
BGC0001980	NRP	Pseudomonas sp.	lokisin	nrpspksdomains_lokC_AMP-binding.2	serine	ser	FEAQVVRSPLAPAVIAGEQPLSYAELNARANQLARHLRELGVGPDSRVAICVERGLDMVVGLLAILKAGGGYVPLDPAYPLERLAYMLEDSAPLAVLVQGSTRLLLGDVGVPVIDLDLPHWQSLPTDNLAITELAPQHTAYVIYTSGSTGQPKGVINEHCGVVNRLLWMQDAYQLTAADTVLQKTPFSFDVSVWEFFWPLMTGARLVMARPEGHKDPLYLSEIIEREKITTLHFVPSMLDVFLAHADTTRCSSLRQVMCSGEALPGSVVRRFKQQLPSSQLHNLYGPTEAAVDVTAWNCAGPVENTPDNTPIGKPIANTRMYILDAQQQPVPQGVVGELYIGGVQVARGYLNRPELNAERFLTDPFQANGRMYRTGDVARYLPDGNIEYLGRNDDQVKIR	TTCGAGGCGCAAGTGGTGCGCTCGCCTCTGGCGCCCGCCGTGATCGCGGGTGAGCAGCCACTGAGCTACGCCGAACTTAACGCCCGGGCCAATCAACTGGCACGGCACCTGCGCGAATTGGGCGTAGGGCCGGACTCACGGGTGGCGATCTGCGTCGAGCGCGGTCTGGACATGGTGGTCGGGCTGCTGGCGATCCTCAAGGCTGGCGGCGGTTATGTGCCGCTGGATCCGGCGTATCCGCTGGAACGTCTGGCCTACATGCTGGAGGACAGCGCGCCGCTGGCGGTGCTGGTGCAGGGTTCGACGCGTTTGTTGCTCGGTGACGTTGGCGTGCCGGTGATCGATCTGGATCTGCCGCATTGGCAATCGCTGCCGACGGACAATCTTGCGATAACCGAA…	CCCCCCC[C@H](CC(=O)N[C@H](CC(C)C)C(=O)N[C@H](CC(=O)O)C(=O)N[C@@H]1[C@H](OC(=O)[C@@H](NC(=O)[C@H](NC(=O)C(NC(=O)[C@H](NC(=O)[C@H](NC(=O)[C@@H](NC(=O)[C@@H](NC(=O)[C@@H](NC1=O)CC(C)C)CC(C)C)CO)CC(C)C)CO)CC(C)C)[C@H](C)CC)CC(=O)O)C)O	['Structure-based inference']	['pubmed:31354771']
BGC0001980	NRP	Pseudomonas sp.	lokisin	nrpspksdomains_lokC_AMP-binding.3	leucine	leu	FEQQALERPQALAAVFADASLSYAELNRQANSLAHHLIASGVQPDDRVAIVARRGLDTLVGLVAILKAGAGYVPVDPAHPAERLSYLLQDSAPVVVLSQSDLRERLPALSVPLIDLDLRQWSNERIDNPSLPALSPQHLAYVIYTSGSTGLPKGVMVEHQTLSNLVDWHCAAFDLHAGSHTSSLAGFGFDAMAWEVWPALCCGATLHLAPSHEGNEDIDALLAWWRAQPLDVSFLPTPVAEYAFSQEPAHPTLKTLLIGGDRLRQFNRNQPFRVINNYGPTEATVVATSGLIAAGDVLHIGKPVSNATVYLLDARQRPVPLGVIGELYVGGAGVARGYLNRPQMTAERFLRDPFSSVPNARMYRTGDLARWREDGTLEYLGRNDDQVKIR	TTCGAGCAGCAAGCGCTTGAGCGACCGCAGGCGCTGGCGGCGGTGTTTGCCGATGCTTCGCTGAGCTATGCCGAGTTGAACCGGCAGGCCAACAGTCTGGCGCATCATCTGATTGCATCGGGTGTACAGCCTGACGATCGCGTGGCCATCGTCGCCCGACGCGGCCTTGATACGCTGGTCGGGCTGGTGGCGATTCTCAAGGCCGGCGCCGGTTATGTGCCGGTGGATCCGGCGCACCCGGCGGAGCGCCTGAGCTATCTGCTGCAAGACAGTGCGCCCGTCGTGGTGCTGAGCCAAAGCGATCTGCGTGAACGCCTGCCGGCATTGTCGGTGCCGCTGATCGACCTTGATCTGCGCCAATGGTCAAACGAGCGCATCGACAACCCATCGCTGCCGGCC…	CCCCCCC[C@H](CC(=O)N[C@H](CC(C)C)C(=O)N[C@H](CC(=O)O)C(=O)N[C@@H]1[C@H](OC(=O)[C@@H](NC(=O)[C@H](NC(=O)C(NC(=O)[C@H](NC(=O)[C@H](NC(=O)[C@@H](NC(=O)[C@@H](NC(=O)[C@@H](NC1=O)CC(C)C)CC(C)C)CO)CC(C)C)CO)CC(C)C)[C@H](C)CC)CC(=O)O)C)O	['Structure-based inference']	['pubmed:31354771']
BGC0001980	NRP	Pseudomonas sp.	lokisin	nrpspksdomains_lokC_AMP-binding.4	isoleucine	ile	FQQQAAAHPKAVAAVHGEHSLSYFELNAQANRLAHHLISQGVQPGDHVAILLPRSLELLVAQLAIAKCAAAYVPLDINAPSERQAFMVEDCHAAALLTLSREVIDYAAPRIDLDRLTLSGQPTHNPNLAQSSESLAYIMYTSGSTGTPKGVMVPHRAIGRLVLNNGYADFNAQDRVVFASNPAFDASTMDIWGPLLNGGRVLVLDHQTLLDPHAFGHELSASGATVLFVTTALFNQYVQLIPQALKGLRILLCGGERGDPAAFRRLLAEAPALRIVHCYGPTETTTYATTFEVREVAENAESVPIGAPISNTQVYVLDAHQQPVPMGVTGELYIGGQGVALGYLNRADLTTEKFLRDPFSEQPGALLYRTGDLARWLAPGQLDCIGRNDDQVKIR	TTCCAGCAGCAGGCAGCGGCGCATCCCAAAGCGGTGGCGGCGGTGCATGGCGAGCATTCGCTGAGCTACTTTGAACTGAACGCCCAGGCCAACCGTCTGGCGCATCACTTGATCAGCCAAGGCGTGCAGCCCGGCGACCACGTGGCGATCCTGTTGCCGCGTTCGCTGGAATTGCTGGTGGCGCAACTGGCGATTGCCAAGTGCGCGGCGGCCTATGTGCCGCTGGATATCAATGCTCCGAGCGAACGGCAGGCGTTCATGGTCGAAGACTGTCACGCGGCGGCGTTGCTGACCCTCAGCCGTGAAGTCATCGACTACGCTGCGCCACGCATCGACCTCGACCGCTTGACCCTCAGCGGCCAACCGACGCACAACCCGAATCTGGCGCAGTCCTCGGAG…	CCCCCCC[C@H](CC(=O)N[C@H](CC(C)C)C(=O)N[C@H](CC(=O)O)C(=O)N[C@@H]1[C@H](OC(=O)[C@@H](NC(=O)[C@H](NC(=O)C(NC(=O)[C@H](NC(=O)[C@H](NC(=O)[C@@H](NC(=O)[C@@H](NC(=O)[C@@H](NC1=O)CC(C)C)CC(C)C)CO)CC(C)C)CO)CC(C)C)[C@H](C)CC)CC(=O)O)C)O	['Structure-based inference']	['pubmed:31354771']
BGC0001980	NRP	Pseudomonas sp.	lokisin	nrpspksdomains_lokC_AMP-binding.5	aspartic acid	asp	FEAQVRRKPDAVALQSEQGNQTYRELNQRANRLAQHLRELGVQPEARVAICIERGLDLIVGLLGILKAGGAYVPLDPGYPAERLAYMLKDSAPVAVLVQTATRGLFDDAVATVIDLDRSTWQHLPDHDSPVPGLSASNLAYMIYTSGSTGLPKGVMIEHRSACNMVHWGSQISPPTEHGALLQKAPFSFDSSVWEIFWPLCSGMRLVLARPDGNRDSAYVVQTIREQQVTVVKFVPALLQQFIEQDGVEQCTSLTDVLNGGGELSAALARQVRDRLPWVRLHNVYGPTETTVDSTGWTLEPDMPVPENVVPIGTALSNTRLYVLDAYGQPVPQGVSGELHIGGVGVARGYHGLPEMQAERFIDSPFVAGDRLYRTGDLARYNNHGELEFLGRNDFQIKLR	TTCGAAGCGCAGGTGCGGCGCAAACCGGACGCTGTCGCGCTGCAATCGGAGCAGGGAAACCAGACCTACCGCGAGCTCAATCAGCGCGCCAACCGCTTGGCGCAGCATCTGCGCGAACTCGGTGTGCAGCCGGAGGCGCGGGTGGCGATCTGCATCGAGCGCGGGCTGGATCTGATCGTTGGTCTGCTCGGCATCCTCAAGGCTGGTGGTGCCTATGTGCCGCTGGATCCGGGGTATCCGGCGGAGCGTCTGGCGTACATGCTCAAGGACAGCGCGCCGGTGGCGGTGCTGGTGCAGACCGCGACTCGCGGGTTGTTCGATGACGCCGTCGCCACGGTAATCGACCTTGACCGCAGTACCTGGCAGCACCTGCCGGATCACGATTCGCCAGTGCCGGGT…	CCCCCCC[C@H](CC(=O)N[C@H](CC(C)C)C(=O)N[C@H](CC(=O)O)C(=O)N[C@@H]1[C@H](OC(=O)[C@@H](NC(=O)[C@H](NC(=O)C(NC(=O)[C@H](NC(=O)[C@H](NC(=O)[C@@H](NC(=O)[C@@H](NC(=O)[C@@H](NC1=O)CC(C)C)CC(C)C)CO)CC(C)C)CO)CC(C)C)[C@H](C)CC)CC(=O)O)C)O	['Structure-based inference']	['pubmed:31354771']
BGC0002037	NRP	Pseudomonas aeruginosa PAO1	azetidomonamide A	nrpspksdomains_PA3327_AMP-binding.1	serine	ser	FAEQVARTPQRTALLEADGGTLSYAELDAKVQAVADALRAAGVRTDERVALLVARGPHLLPAILGVQRAGGAYVPINPDHPLERVRLLLEDCGARVVLVDERAATLGESLGETRVLHLERLPQSTGDLPAANVAPGDLAYVIYTSGSTGMPKGVMVEHRSVVNRLNWMQRRYPIGERDVLLQKTPVTFDVSVWELFWWSFTGARLSLLPPGAEKDPREMLRSIQRDAVTVIHFVPSMLTPFLDLLDGDPTARAAASSLRLVFCSGEALAPLQVARFRRLFGDAVRLVNLYGPTEATVDVSDHECASDNPTRVPIGRPIDNLRLYVLDRALRPQPLGAVGELYIGGVGVARGYLNRPELNAERFLVDPFVAGGRLYRTGDLARWLADGNLEYLGRADDQV…	TTCGCCGAGCAGGTGGCGCGCACCCCGCAACGCACCGCGCTGCTGGAAGCCGACGGCGGCACGCTCAGCTATGCCGAGCTGGACGCCAAGGTCCAGGCCGTGGCCGACGCCCTGCGCGCAGCGGGTGTGAGGACCGACGAGCGGGTAGCGCTACTGGTCGCCCGCGGTCCCCACCTGCTGCCGGCGATCCTTGGCGTGCAGCGCGCCGGCGGCGCCTATGTGCCGATCAATCCCGACCATCCCCTGGAGCGCGTCCGCCTGCTGTTGGAAGACTGCGGTGCCCGCGTGGTGCTGGTGGACGAGCGCGCAGCGACACTCGGCGAGAGCCTCGGCGAGACGCGCGTGCTGCACCTCGAACGCCTGCCGCAGAGCACCGGCGACCTGCCGGCGGCCAACGTG…	C/C=C/C(=O)NC1=CC=C2[C@H](O)CN2C(=O)O1	['Structure-based inference']	['pubmed:31247735', 'doi:10.1002/anie.201809981']
BGC0002037	NRP	Pseudomonas aeruginosa PAO1	azetidomonamide A	nrpspksdomains_PA3327_AMP-binding.2	azetidine-2-carboxylic acid	aze	FERQVEALPGSAALAFEEQRWTYRDLDHVARCVATRLVRAGARRGDAIGVALNRSPEMIATIWGILRAGLVCVPLDVSYPAQRLALILETAQPFRVVAHPEHAHVAAAERVLPVEELVADIEPETFAAPQLDELAMLLFTSGSTGRPKGVELSHRMWANYTQWQLRVASGVPGLRTLQFAPLSFDMAFQEIFSTLCGGGELQLISNRERMDPSALLHVLERRQVQRVLLPFVALQRLAEASNALGVRPGALRVVVSSGEQLRITEDVRAFCAAMPGLLLENQYGPTETHQVTYHSLSGDPAHYPDLPPIGRPLDGVEVQVLDAALRPVPVGVTGELYFGGDCLARGYHRAPKLTAERFVEHPWRPGARLYRTGDLGRILGNGEIVWLGRADTQVKVR	TTCGAACGCCAGGTCGAGGCGCTGCCGGGCAGCGCCGCGCTGGCCTTCGAGGAGCAACGCTGGACCTATCGCGACCTCGACCATGTGGCGCGCTGCGTGGCCACCCGCCTGGTCCGCGCCGGCGCGCGCCGCGGCGATGCGATCGGAGTGGCGCTGAACCGTTCGCCGGAGATGATCGCGACGATCTGGGGCATCCTGCGCGCCGGCCTGGTCTGCGTGCCGCTGGACGTCAGCTATCCCGCGCAGCGCCTGGCGCTGATCCTGGAGACCGCACAGCCGTTCCGGGTGGTCGCGCATCCCGAGCACGCCCATGTCGCCGCGGCGGAACGGGTGCTGCCGGTAGAGGAACTGGTCGCCGACATCGAGCCCGAGACCTTCGCCGCGCCGCAGCTCGACGAG…	C/C=C/C(=O)NC1=CC=C2[C@H](O)CN2C(=O)O1	['Structure-based inference']	['pubmed:31247735', 'doi:10.1002/anie.201809981']
BGC0002037	NRP	Pseudomonas aeruginosa PAO1	azetidomonamide A	nrpspksdomains_PA3327_AMP-binding.1	serine	ser	FAEQVARTPQRTALLEADGGTLSYAELDAKVQAVADALRAAGVRTDERVALLVARGPHLLPAILGVQRAGGAYVPINPDHPLERVRLLLEDCGARVVLVDERAATLGESLGETRVLHLERLPQSTGDLPAANVAPGDLAYVIYTSGSTGMPKGVMVEHRSVVNRLNWMQRRYPIGERDVLLQKTPVTFDVSVWELFWWSFTGARLSLLPPGAEKDPREMLRSIQRDAVTVIHFVPSMLTPFLDLLDGDPTARAAASSLRLVFCSGEALAPLQVARFRRLFGDAVRLVNLYGPTEATVDVSDHECASDNPTRVPIGRPIDNLRLYVLDRALRPQPLGAVGELYIGGVGVARGYLNRPELNAERFLVDPFVAGGRLYRTGDLARWLADGNLEYLGRADDQV…	TTCGCCGAGCAGGTGGCGCGCACCCCGCAACGCACCGCGCTGCTGGAAGCCGACGGCGGCACGCTCAGCTATGCCGAGCTGGACGCCAAGGTCCAGGCCGTGGCCGACGCCCTGCGCGCAGCGGGTGTGAGGACCGACGAGCGGGTAGCGCTACTGGTCGCCCGCGGTCCCCACCTGCTGCCGGCGATCCTTGGCGTGCAGCGCGCCGGCGGCGCCTATGTGCCGATCAATCCCGACCATCCCCTGGAGCGCGTCCGCCTGCTGTTGGAAGACTGCGGTGCCCGCGTGGTGCTGGTGGACGAGCGCGCAGCGACACTCGGCGAGAGCCTCGGCGAGACGCGCGTGCTGCACCTCGAACGCCTGCCGCAGAGCACCGGCGACCTGCCGGCGGCCAACGTG…	C/C=C/C(=O)NC1=CC=C2[C@H](O)CN2C(=O)O1	['Structure-based inference', 'Mass spectrometry', 'ATP-PPi exchange assay']	['pubmed:31247735', 'doi:10.1002/anie.201809981']
BGC0002037	NRP	Pseudomonas aeruginosa PAO1	azetidomonamide A	nrpspksdomains_PA3327_AMP-binding.2	azetidine-2-carboxylic acid	aze	FERQVEALPGSAALAFEEQRWTYRDLDHVARCVATRLVRAGARRGDAIGVALNRSPEMIATIWGILRAGLVCVPLDVSYPAQRLALILETAQPFRVVAHPEHAHVAAAERVLPVEELVADIEPETFAAPQLDELAMLLFTSGSTGRPKGVELSHRMWANYTQWQLRVASGVPGLRTLQFAPLSFDMAFQEIFSTLCGGGELQLISNRERMDPSALLHVLERRQVQRVLLPFVALQRLAEASNALGVRPGALRVVVSSGEQLRITEDVRAFCAAMPGLLLENQYGPTETHQVTYHSLSGDPAHYPDLPPIGRPLDGVEVQVLDAALRPVPVGVTGELYFGGDCLARGYHRAPKLTAERFVEHPWRPGARLYRTGDLGRILGNGEIVWLGRADTQVKVR	TTCGAACGCCAGGTCGAGGCGCTGCCGGGCAGCGCCGCGCTGGCCTTCGAGGAGCAACGCTGGACCTATCGCGACCTCGACCATGTGGCGCGCTGCGTGGCCACCCGCCTGGTCCGCGCCGGCGCGCGCCGCGGCGATGCGATCGGAGTGGCGCTGAACCGTTCGCCGGAGATGATCGCGACGATCTGGGGCATCCTGCGCGCCGGCCTGGTCTGCGTGCCGCTGGACGTCAGCTATCCCGCGCAGCGCCTGGCGCTGATCCTGGAGACCGCACAGCCGTTCCGGGTGGTCGCGCATCCCGAGCACGCCCATGTCGCCGCGGCGGAACGGGTGCTGCCGGTAGAGGAACTGGTCGCCGACATCGAGCCCGAGACCTTCGCCGCGCCGCAGCTCGACGAG…	C/C=C/C(=O)NC1=CC=C2[C@H](O)CN2C(=O)O1	['Structure-based inference', 'Mass spectrometry', 'ATP-PPi exchange assay']	['pubmed:31247735', 'doi:10.1002/anie.201809981']
BGC0002071	NRP	Pseudomonas sp. QS1027	virginiafactin A	nrpspksdomains_CWE01_RS05095_AMP-binding.1	leucine	leu	EAQARTRPDAVAAMHQGRSLTYGELNRRANGLAQCLIELGVRPEDRVAIVARRGLETLVGLLAILKAGAAYVPIDPAHPRERLAYLLDDSAPAVLLTQAALVDRLPPVVVPLIELDRCDWGHAPKGNPQVAGLASHNLAYVIYTSGSTGQPKGVMVEHRMLANLVDWHCDAFALGEGGHASCLAGFGFDAMAWEVWPTLCAGATLHLAPTQDSGEDIDALLRWWRAQPLDVSFLPTPVAEYAFSQAEEHPTLRTLLIGGDRLRQFARNRRYGVVNNYGPTESTVVATSGQVLADGVLHIGGPIANTQVHVLDEQLQPVPVGVIGELYIGGAGVARGYLNRPQLTEERFVADPFSREPQARMYRSGDLVRWNADGTLDYLGRNDDQVKIR	GAGGCCCAGGCCCGAACACGCCCGGACGCCGTGGCGGCGATGCACCAGGGAAGAAGCCTGACCTACGGGGAACTCAATCGTCGAGCCAATGGCTTGGCGCAATGCCTGATCGAACTGGGTGTGCGCCCTGAAGACCGTGTCGCCATCGTGGCCCGTCGCGGCCTGGAGACCCTGGTGGGTCTGCTGGCGATTCTCAAGGCCGGTGCAGCCTATGTGCCCATCGACCCGGCTCATCCGCGCGAGCGCCTGGCCTATCTGCTGGACGACAGCGCACCCGCCGTGCTGCTGACCCAGGCGGCCCTGGTTGATCGCCTGCCACCTGTTGTCGTGCCGCTGATTGAACTGGATCGTTGCGACTGGGGCCACGCGCCCAAGGGCAATCCCCAGGTCGCGGGCCTG…	CCCCCCC[C@@H](O)CC(=O)N[C@@H](CC(C)C)C(=O)N[C@@H](CC(C)C)C(=O)N[C@H](CCC(N)=O)C(=O)N[C@@H](CC(C)C)C(=O)N[C@H](CO)C(=O)N[C@H](C(=O)N[C@H](CC(C)C)C(=O)N[C@@H](CC(C)C)C(=O)O)C(C)C	['Structure-based inference']	['doi:10.1039/c9sc03633d']
BGC0002071	NRP	Pseudomonas sp. QS1027	virginiafactin A	nrpspksdomains_CWE01_RS05095_AMP-binding.2	leucine	leu	EARAARSPQAPAVVQGGQVLTCAELNQRANRLAHHLIGLGVKPDERVALCLHRGMERLVGLLAVLKAGAAYVPVDPAYPAERIAYLLQDSAPRVVLAEGATLDLVGDVPRVDLDQDAWHHESDSNPEVPGLHDGHLAYVIYTSGSTGQPKGVMVEHRTLNNLVHWHAQAFDLRAGSHTSSIAGFGFDAMAWEVWPALCAGAVLHLPPVEVGNDQIDALLDWWLAQPLQVSFLPTPVAEQAFRRTHQHPTLRTLLIGGDRLRQFDREPGFAVINNYGPTETTVVATSGRVRVGGSLPIGAPIANTCNYVLDEQRQPVPVGVIGELYIGGAGVARGYLNRPQLTGESFVSDPFSSEPQARMYRSGDLVRWNADGTLDYLGRNDDQVKIR	GAGGCCCGGGCCGCCCGTTCGCCGCAGGCACCTGCGGTGGTCCAGGGCGGGCAAGTCCTGACCTGCGCCGAGCTCAACCAGCGCGCCAACCGCCTGGCGCATCACCTGATCGGTCTCGGCGTGAAGCCGGACGAGCGAGTCGCCTTGTGTCTGCACCGGGGGATGGAGCGCCTGGTCGGTCTGTTGGCGGTGCTCAAGGCCGGTGCCGCCTATGTGCCGGTGGACCCGGCCTATCCGGCCGAGCGCATCGCCTATCTGCTACAGGACAGCGCGCCACGGGTGGTACTGGCCGAGGGCGCGACCCTCGATCTGGTCGGTGATGTTCCTCGGGTGGACCTGGACCAGGATGCCTGGCATCACGAGTCGGACAGCAACCCAGAGGTACCCGGTCTGCACGAC…	CCCCCCC[C@@H](O)CC(=O)N[C@@H](CC(C)C)C(=O)N[C@@H](CC(C)C)C(=O)N[C@H](CCC(N)=O)C(=O)N[C@@H](CC(C)C)C(=O)N[C@H](CO)C(=O)N[C@H](C(=O)N[C@H](CC(C)C)C(=O)N[C@@H](CC(C)C)C(=O)O)C(C)C	['Structure-based inference']	['doi:10.1039/c9sc03633d']
BGC0002071	NRP	Pseudomonas sp. QS1027	virginiafactin A	nrpspksdomains_CWE01_RS05095_AMP-binding.3	glutamine	gln	FETQVARTPQAVALRAEGAQLSYQQLNEQANGLAHHLIGLGVQPGDRVAICVERGVSMVVGLLAILKAGGAYVPLDPGYPRERIHYMLEDSAPVVVLMQAATRELLGEERALQVNLESAAWSPQHIDNPRIAELTPRHLAYVIYTSGSTGMPKGVMVEHRGVVNLVHWTSRLCPPTRGGALLHKTPISFDASVWELFWPLCAGVPLVLSRPDGQLDPAYLVRLIREQQVSVVQFVPALLQAFLNLEESAGCDGLSDIVCGGGELSVALAEQVRKRLPSVRLHNVYGPTETTVDCSAWTLEPHEPVPHTALPIGLPISNTRLYVLDACDQPVPLGVSGQLHIGGAGVTRGYLNLPELQAERFIASPFVAGDRLYRSGDLVRQRADGNLEFLGRNDDQFKL	TTCGAGACCCAGGTTGCACGTACGCCGCAGGCTGTGGCGCTGCGGGCCGAAGGTGCGCAACTGAGCTATCAACAACTCAACGAACAGGCCAACGGCCTGGCCCATCATCTGATCGGCCTGGGGGTTCAGCCCGGCGACCGGGTGGCGATCTGCGTCGAGCGCGGCGTGTCCATGGTGGTCGGGCTGCTGGCCATCCTCAAGGCCGGTGGTGCCTATGTGCCGTTGGACCCGGGCTATCCGCGCGAGCGTATCCACTACATGCTCGAGGACAGCGCGCCGGTGGTGGTACTGATGCAGGCCGCGACCCGTGAGCTGCTGGGTGAGGAGCGTGCGCTACAGGTCAATCTTGAGAGTGCCGCCTGGAGCCCGCAGCACATCGACAATCCGCGTATCGCCGAG…	CCCCCCC[C@@H](O)CC(=O)N[C@@H](CC(C)C)C(=O)N[C@@H](CC(C)C)C(=O)N[C@H](CCC(N)=O)C(=O)N[C@@H](CC(C)C)C(=O)N[C@H](CO)C(=O)N[C@H](C(=O)N[C@H](CC(C)C)C(=O)N[C@@H](CC(C)C)C(=O)O)C(C)C	['Structure-based inference']	['doi:10.1039/c9sc03633d']
BGC0002071	NRP	Pseudomonas sp. QS1027	virginiafactin A	nrpspksdomains_CWE01_RS05100_AMP-binding.1	leucine	leu	EQQALEQPDAVAAQVGGRRLSYGELNRRANALAGHLISLGVRPDDRVAILARRSLDTLVGLLAILKAGAGYVPVDPAHPDERVGYLLDDSAPVAVLTQHALLGRLPALAVPVIALDRPDWPEQAGNPHVPGLTSANLAYVIYTSGSTGQPKGVMVEHRTLNNLVDWHCQVFDLHAGSHTASVAGFGFDAMAWEVWPALCAGAVLHLPPADISNEQLDALLDWWLAQPLEVAFLSTPVAEYAFSRDLRHPTLRTLLIGGDRLRQFHSDPGFAVINNYGPTEATVVATSGRLLPGGGLDIGKPIANTRVYLLDEQQQLVPFGVAGELYVAGAGVARGYLNRPELTAERFLDDPFAEQPGARMYRTGDLACWNADGTLDYLGRNDDQVKIR	GAACAGCAGGCACTTGAACAACCCGATGCGGTGGCGGCGCAAGTAGGTGGGCGGCGTCTGAGCTATGGTGAACTGAATCGTCGCGCCAATGCCCTGGCCGGTCACCTGATCAGCCTCGGCGTGCGCCCTGATGATCGCGTGGCGATCCTCGCCCGGCGCAGCCTGGATACCCTGGTCGGTCTGTTGGCGATTCTCAAGGCCGGTGCCGGTTATGTGCCGGTCGATCCGGCACATCCGGACGAGCGAGTGGGTTACCTGCTGGACGACAGTGCGCCCGTGGCGGTGCTGACCCAGCACGCATTGCTCGGGCGTCTGCCGGCGTTGGCTGTGCCGGTGATCGCCCTCGATCGCCCTGACTGGCCGGAGCAGGCCGGCAATCCTCATGTGCCGGGGCTGACA…	CCCCCCC[C@@H](O)CC(=O)N[C@@H](CC(C)C)C(=O)N[C@@H](CC(C)C)C(=O)N[C@H](CCC(N)=O)C(=O)N[C@@H](CC(C)C)C(=O)N[C@H](CO)C(=O)N[C@H](C(=O)N[C@H](CC(C)C)C(=O)N[C@@H](CC(C)C)C(=O)O)C(C)C	['Structure-based inference']	['doi:10.1039/c9sc03633d']
BGC0002071	NRP	Pseudomonas sp. QS1027	virginiafactin A	nrpspksdomains_CWE01_RS05100_AMP-binding.2	serine	ser	FEARVASCGDSVAVVDEKGSLTYDALNRQANRIAHRLIGLGIGPDDRVAICVDRSLEMVAGLMGILKAGAAYVPLDPDYPIDRLTYMLENCAPAVVLTQEALRAVLPASSVPVLLLDPEHAEREGFLAQSDSNPLRAEVRPEHLAYVIYTSGSTGQPKGVMNEHRGVVNRLLWMQDEYGLDASDSVLQKTPFSFDVSVWEFFWPLFNGARLVMARPGGHRDPGYLREVIREQNITTLHFVPSMLDLFLAHGEAGDSGLLRVMCSGEALPGHLVRRFKQQLPEVGLFNLYGPTEAAVDVTAWDCAGPLGETPDNTPIGKPVANTRIYLLDSSRQPVPLGVAGELYIGGVQVARGYLNRPELSAERFLDDPFTAGRMYRTGDLGRYLPDGTVEYLGRNDDQ…	TTCGAGGCGCGGGTTGCCAGTTGTGGTGACTCGGTAGCGGTCGTCGACGAGAAGGGCAGCCTGACTTACGACGCACTCAACCGTCAGGCCAACCGTATCGCCCATCGTCTGATCGGCCTGGGCATTGGTCCGGATGATCGGGTGGCAATCTGTGTCGACCGCAGCCTGGAAATGGTTGCAGGGTTGATGGGGATTCTCAAAGCCGGCGCTGCGTATGTGCCGCTGGACCCGGATTATCCGATTGATCGCCTGACCTACATGCTGGAGAACTGTGCTCCTGCTGTAGTCCTCACCCAAGAGGCTTTGCGTGCGGTGCTTCCAGCAAGCAGCGTACCGGTACTGTTGCTCGATCCTGAGCATGCCGAGCGTGAAGGTTTCCTCGCACAATCGGATAGCAAT…	CCCCCCC[C@@H](O)CC(=O)N[C@@H](CC(C)C)C(=O)N[C@@H](CC(C)C)C(=O)N[C@H](CCC(N)=O)C(=O)N[C@@H](CC(C)C)C(=O)N[C@H](CO)C(=O)N[C@H](C(=O)N[C@H](CC(C)C)C(=O)N[C@@H](CC(C)C)C(=O)O)C(C)C	['Structure-based inference']	['doi:10.1039/c9sc03633d']
BGC0002071	NRP	Pseudomonas sp. QS1027	virginiafactin A	nrpspksdomains_CWE01_RS05100_AMP-binding.4	leucine	leu	EAQALRAPQALAAQVGEDRLSYGELNRRANALAHHLIGLGVRPDDRVAILARRGLDTLVGLLAILKAGAAYVPVDPAHPDERVGYLLDDSAPVAVLTQQTLFARLPELAVPMIALDRPDWPEQSGNPQVPGLTPENLAYVIYTSGSTGQPKGVMVEHRTLNNLVHWHCQAFDLHAGSHTASVAGFGFDAMAWEVWPALCAGAVLHLPPAEIGNEQLDALLDWWLAQPLAVAFLPTPVAEYAFSRDLRHPTLRTLLIGGDRLRQFPRDPGFAVINNYGPTEATVVATSGRLLPGGGLDIGKPIANTRVYLLDEQLQLVPFGVAGELYVAGAGVARGYLNRADLTAERFLRDPFNADPQARMYRTGDLARWNADGTLDYLGRNDDQVKIR	GAGGCCCAGGCGTTGCGGGCACCGCAGGCCCTGGCCGCCCAGGTCGGCGAGGACCGTCTGAGTTATGGCGAACTGAACCGTCGGGCCAATGCCCTGGCTCATCATCTGATCGGCCTCGGCGTGCGTCCCGACGACCGTGTGGCGATCCTCGCCCGTCGCGGGCTGGATACCCTGGTCGGCCTGCTGGCAATCCTCAAGGCCGGTGCCGCTTATGTGCCGGTCGATCCAGCGCACCCGGATGAGCGCGTCGGCTACCTGCTGGACGACAGCGCGCCCGTGGCGGTACTGACCCAGCAGACGTTGTTTGCCCGCCTGCCAGAGCTGGCCGTGCCGATGATTGCCCTGGATCGCCCTGATTGGCCGGAACAGTCCGGCAATCCGCAGGTGCCGGGGCTGACA…	CCCCCCC[C@@H](O)CC(=O)N[C@@H](CC(C)C)C(=O)N[C@@H](CC(C)C)C(=O)N[C@H](CCC(N)=O)C(=O)N[C@@H](CC(C)C)C(=O)N[C@H](CO)C(=O)N[C@H](C(=O)N[C@H](CC(C)C)C(=O)N[C@@H](CC(C)C)C(=O)O)C(C)C	['Structure-based inference']	['doi:10.1039/c9sc03633d']
BGC0002071	NRP	Pseudomonas sp. QS1027	virginiafactin A	nrpspksdomains_CWE01_RS05100_AMP-binding.5	leucine	leu	EQQALERPDAVAAQVGEGRLSYGELNRRANALAHHLIGLGVCPDDRVAILARRSLDTLVGLLAILKAGAAYVPVDPAHPDERVGYLLDDSAPVAVLTQHALLGRLPELSVPLIALDRPHWPEHGDNPQVPGLTPGHLAYVIYTSGSTGQPKGVMVEHRTLGNLVDWHCQAFDLHAGTHTASVAGFGFDAMAWEVWPALCAGAVLHLPPAEIGNEQLDALLDWWLAQPLEVAFLPTPVAEYAFSRDRQHPTLRTLLIGGDRLRQFNRDPGFAVVNNYGPTETTVVASSGLMAVGGVLHIGKPVSHARLYVLDERREPVPLGVPGELYVGGSGVARGYLNRPELTAERFLDDPFAGPSGARMYRTGDRVRWLADGTLEYLGRNDDQVKIR	GAACAACAGGCGCTTGAGCGTCCTGATGCCGTGGCCGCACAAGTGGGAGAGGGCCGTCTGAGCTACGGCGAACTGAACCGTCGCGCCAATGCCCTGGCTCACCACTTGATCGGCCTCGGCGTGTGTCCCGACGATCGCGTGGCGATCCTGGCCCGGCGTAGCCTGGATACCCTGGTGGGGTTGTTGGCGATTCTCAAGGCCGGTGCCGCTTATGTGCCGGTCGATCCGGCGCACCCGGACGAGCGCGTCGGCTATCTGCTGGACGACAGCGCGCCCGTGGCGGTGCTGACCCAGCACGCGTTGTTGGGACGTCTGCCCGAGTTGAGTGTGCCGCTGATCGCCCTGGATCGCCCGCACTGGCCGGAGCATGGGGACAATCCGCAGGTGCCCGGGCTGACA…	CCCCCCC[C@@H](O)CC(=O)N[C@@H](CC(C)C)C(=O)N[C@@H](CC(C)C)C(=O)N[C@H](CCC(N)=O)C(=O)N[C@@H](CC(C)C)C(=O)N[C@H](CO)C(=O)N[C@H](C(=O)N[C@H](CC(C)C)C(=O)N[C@@H](CC(C)C)C(=O)O)C(C)C	['Structure-based inference']	['doi:10.1039/c9sc03633d']
BGC0002075	NRP_Alkaloid	Pseudomonas fluorescens	pyreudione A	nrpspksdomains_A8O26_RS14270_AMP-binding.1	proline	pro	ANAVHDYAERPALSQGAQTLSYRRLDDDATRLAAHLRERGVRAGDCVVVMFSRSVEWAVAAVALFKLGACYVPVDPDLPEARIEHIFSDADPAVVIVAPGSQLKVEVAADKLLRLSAETLAQLPAVTQPLSAFDAGLPGYLIYTSGSTGKPKGVEVTQRNLVPIARTAINAAQLQPGARVLQFIAAGFDMSVLEIMMTLLAGAELVITDKVSSAPGKALATLVKREGINLLVMTPSLLACHQTEDFPQDTVLMLGGEPCTPALLARFAHCRLLNVYGPTETSFATSINACYGAGDLSIGPATANTRLYVVDGQQRLLPPGAWGDLFIGGPGVARGYRNRPDLTAKGFVADLLDSASTMYRAGDRVFFDHAGRIHYLGRQDNQIKLR	GCCAACGCCGTGCACGATTACGCCGAGCGTCCGGCACTGTCGCAAGGCGCACAGACCTTGAGCTACCGCCGCCTCGACGATGACGCCACGCGCCTCGCTGCACACTTGCGTGAACGCGGCGTGCGCGCCGGTGACTGCGTGGTGGTGATGTTCTCGCGCAGTGTCGAATGGGCGGTGGCCGCGGTGGCCCTGTTCAAACTCGGCGCCTGCTATGTGCCGGTGGATCCGGATCTGCCCGAGGCGCGCATCGAACACATCTTCAGCGATGCCGACCCGGCCGTGGTGATCGTTGCCCCGGGCAGTCAGCTCAAGGTTGAGGTCGCCGCCGACAAACTGCTGCGACTGAGCGCTGAAACCCTGGCGCAATTACCGGCGGTGACTCAGCCGTTGTCGGCATTT…	O=C([C@@]1([H])N(C/2=O)CCC1)C2=C(O)/CCCCCCC	['ATP-PPi exchange assay', 'Mass spectrometry', 'Structure-based inference']	['pubmed:27294402', 'pubmed:29606578', 'pubmed:31294961']
BGC0002092	NRP	Pseudomonas sp.	stechlisin B2	nrpspksdomains_steA_AMP-binding.1	leucine	leu	FESRVDQQPDAVVATYQGRTLSYAELNRQANALAHHLIGLGVRPDDRVAIVARRGLETLVGLLAILKAGAAYVPIDPAHPPERLSYLLSDSAPVALLTQSDLRDRLSATALPVVELDRCEWSLDNVNDPDVAELNTCHLAYVIYTSGSTGLPKGVMVEHRTLGNLVDWHCAAFGLGHGQHTSSLAGFGFDAMAWEVWPALCAGATVHFSPASEGIEGIDALLAWWQAQPLDVSFLPTPVAEYAFSKQLDHPTLRTLLIGGDRLRQFNRAQSFAVVNNYGPTEATVVATSGLITPGQALHIGKPVSNATAYLLDDQQRPVPIGIIGELYVGGAGVARGYLNRPELTAERFLDDPFSAQPDARMYRTGDLARWRADGNLEYIGRNDDQVKVR	TTCGAATCGCGAGTAGACCAACAACCGGACGCCGTGGTCGCGACGTATCAGGGACGAACCCTGAGTTATGCCGAGCTGAACCGGCAAGCCAACGCGCTGGCCCACCATCTGATCGGCCTCGGCGTGCGCCCTGATGATCGTGTGGCGATCGTTGCCCGCCGGGGGCTGGAAACGTTGGTCGGGCTGTTGGCGATTCTCAAGGCGGGCGCCGCTTATGTGCCGATTGACCCGGCACATCCGCCCGAGCGCCTGAGTTATCTGCTCAGCGACAGTGCGCCGGTGGCGCTGCTGACGCAAAGCGATCTGCGTGATCGTTTGTCCGCCACGGCGCTGCCGGTGGTCGAACTGGATCGGTGCGAGTGGTCGCTCGACAACGTGAACGATCCCGACGTGGCGGAG…	CCCCC[C@H](O)CC(=O)N[C@H](CC(C)C)C(=O)N[C@H](CC(=O)O)C(=O)N[C@H]1C(=O)N[C@H](CC(C)C)C(=O)N[C@H](CC(C)C)C(=O)N[C@H](CO)C(=O)N[C@@H](CC(C)C)C(=O)N[C@H](CCC(N)=O)C(=O)N[C@@H](CC(C)C)C(=O)N[C@@H]([C@@H](C)CC)C(=O)N[C@@H](CCC(=O)O)C(=O)O[C@@H]1C	['Structure-based inference']	['doi:10.1021/acs.jnatprod.0c00263', 'doi:10.1046/j.1365-2672.2000.01201.x']
BGC0002092	NRP	Pseudomonas sp.	stechlisin B2	nrpspksdomains_steA_AMP-binding.2	aspartic acid	asp	FEQQVQRKPDAIAVQFAGQRLTYRELNEQANRLAHHLRGIGVKPDSRVAICVERGPELVIGLLGILKAGGAYVPLDPDYPLQRLNYMLQDSAPIALLVHAATRDLLGEPGVPLIDLDLGAWQDQPYDNPQVPGLGATNLAYMIYTSGSTGTPKGVMIEHRSACNMVHWGSQIAPPTEHGALLQKAPYSFDSSVWEIFWPLCSGMRLVLARADGNRDSAYVTQVIREQQITVVKFVPALLQQFIEQDDVSQCTSLTDVLNGGGELTVALARQVRERLPWVRLHNVYGPTETTVDSSAWTLEPGEPVPQTLVPIGKALSNTRLYVLDAFDQPVPFGVSGHLHIGGVGVARGYLGLPQLQAERFIDSPFVAGDRLYRTGDLVRYGTDGNLEFLGRNDFQVKLR	TTCGAACAACAGGTGCAGCGCAAGCCGGATGCCATCGCCGTGCAGTTCGCCGGGCAACGCCTGACCTATCGCGAGCTGAACGAGCAGGCCAACCGCTTGGCCCATCATCTGCGCGGGATCGGCGTAAAGCCGGATTCACGAGTCGCGATCTGCGTCGAGCGCGGGCCTGAGCTGGTGATCGGTCTGCTGGGCATTCTCAAGGCGGGCGGTGCTTACGTGCCGCTCGATCCGGATTATCCGCTGCAACGGCTGAACTACATGTTGCAGGACAGCGCGCCGATCGCGCTGCTGGTGCATGCTGCAACGCGCGATCTGCTTGGCGAGCCCGGCGTGCCGCTGATCGATCTCGACCTCGGTGCCTGGCAGGACCAGCCGTACGACAATCCGCAGGTGCCGGGC…	CCCCC[C@H](O)CC(=O)N[C@H](CC(C)C)C(=O)N[C@H](CC(=O)O)C(=O)N[C@H]1C(=O)N[C@H](CC(C)C)C(=O)N[C@H](CC(C)C)C(=O)N[C@H](CO)C(=O)N[C@@H](CC(C)C)C(=O)N[C@H](CCC(N)=O)C(=O)N[C@@H](CC(C)C)C(=O)N[C@@H]([C@@H](C)CC)C(=O)N[C@@H](CCC(=O)O)C(=O)O[C@@H]1C	['Structure-based inference']	['doi:10.1021/acs.jnatprod.0c00263', 'doi:10.1046/j.1365-2672.2000.01201.x']
BGC0002092	NRP	Pseudomonas sp.	stechlisin B2	nrpspksdomains_steB_AMP-binding.1	threonine	thr	FEAHAQVRPDATALIFDGQTLSYGELNRRANQVAHHLLALNIRPDDRVAICVERGPQMLIGLLGVLKAGAGYVPIDPTYPLDRISFTLQDSAPAALLMQAATRDRVADLNVPQIDLDSAHLKAELDSNPQIPELSPAHLAYVIYTSGSTGLPKGVMVEHRNVARLFSSTHDWFQFNQQDIGVLFHSFAFDFSVWEIWAALAFGGQLLLIPQAVSRSPDDCYALLCQTGVTVLNQTPSAFRQLIAAQGRSQLQHSLREVIFGGEALEPGLLKPWYARVGNAGTRLVNMYGITETTVHVTYRPLQAADAQLLGVSPIGVRIPDLQLYVLDAQREPVPVGVIGELYVGGAGVARGYLNREALTAERFINDPFSENAQARLYKTGDLARWAADGSLEYLGRND…	TTCGAAGCCCATGCCCAAGTGAGGCCTGACGCCACAGCGCTGATATTCGACGGGCAAACCCTCAGTTACGGCGAACTCAACCGCCGCGCCAACCAGGTTGCACATCATCTGCTGGCCCTGAACATTCGCCCTGACGACCGCGTGGCGATCTGCGTCGAGCGTGGCCCGCAAATGCTCATCGGCCTGCTCGGTGTACTCAAGGCCGGTGCCGGTTACGTGCCGATCGATCCGACCTATCCGCTCGACAGAATCAGCTTCACCTTGCAGGACAGCGCCCCGGCAGCGCTGCTGATGCAGGCGGCGACGCGTGATCGCGTGGCCGATCTGAATGTGCCGCAGATCGATCTCGACAGCGCTCACCTCAAGGCCGAACTCGATAGCAATCCGCAGATCCCCGAG…	CCCCC[C@H](O)CC(=O)N[C@H](CC(C)C)C(=O)N[C@H](CC(=O)O)C(=O)N[C@H]1C(=O)N[C@H](CC(C)C)C(=O)N[C@H](CC(C)C)C(=O)N[C@H](CO)C(=O)N[C@@H](CC(C)C)C(=O)N[C@H](CCC(N)=O)C(=O)N[C@@H](CC(C)C)C(=O)N[C@@H]([C@@H](C)CC)C(=O)N[C@@H](CCC(=O)O)C(=O)O[C@@H]1C	['Structure-based inference']	['doi:10.1021/acs.jnatprod.0c00263', 'doi:10.1046/j.1365-2672.2000.01201.x']
BGC0002092	NRP	Pseudomonas sp.	stechlisin B2	nrpspksdomains_steB_AMP-binding.2	leucine	leu	FEAQVAAQPEALAVVQGEQQLSYGELNQRANRLAHHLLGLGVQVDDRVALCLRRGPDMLVALLAILKAGAGYVPIDPYYPAERIAYLLHDSDPIAVLAQASTRELLGVVPVIDLDASDWQHLPDSNPTLSRLTPANLAYVIYTSGSTGQPKGVMVEHRTLENLVHWHAEAFDLHAGSHTASVAGCGFDAMAWEVWPALCVGATVHLPPPAIGNEHLDELLEWWRGQPLQVSFLPTPVAEYAFSRGLGHPTLRTLLIGGDKLRQLPRDQAFDVINNYGPTEATVVATSGRVETGQVLHIGRPIANARIYLLDRQQQPVPTGVQGELYVGGAGVARGYLNRPELTAAHFLDDPFSDEPHARMYRTGDLARWLADGNIEYLGRNDDQVKLR	TTCGAAGCGCAAGTGGCCGCGCAGCCCGAGGCGCTGGCGGTGGTGCAGGGCGAGCAACAGCTCAGCTATGGCGAACTGAATCAGCGCGCCAATCGCCTGGCCCATCACTTGCTCGGCCTCGGCGTGCAGGTCGACGACCGTGTTGCGCTGTGCCTGCGTCGTGGCCCGGACATGCTCGTTGCGCTGCTGGCGATTCTCAAGGCCGGTGCCGGTTACGTGCCGATCGATCCGTATTACCCGGCAGAGCGCATCGCCTACCTGTTGCACGACAGCGACCCGATCGCCGTGCTCGCGCAAGCGTCGACGCGCGAGCTGCTTGGCGTTGTGCCGGTGATCGATCTGGACGCCAGCGACTGGCAGCACTTGCCTGACAGCAACCCCACACTGTCGAGGCTGACC…	CCCCC[C@H](O)CC(=O)N[C@H](CC(C)C)C(=O)N[C@H](CC(=O)O)C(=O)N[C@H]1C(=O)N[C@H](CC(C)C)C(=O)N[C@H](CC(C)C)C(=O)N[C@H](CO)C(=O)N[C@@H](CC(C)C)C(=O)N[C@H](CCC(N)=O)C(=O)N[C@@H](CC(C)C)C(=O)N[C@@H]([C@@H](C)CC)C(=O)N[C@@H](CCC(=O)O)C(=O)O[C@@H]1C	['Structure-based inference']	['doi:10.1021/acs.jnatprod.0c00263', 'doi:10.1046/j.1365-2672.2000.01201.x']
BGC0002092	NRP	Pseudomonas sp.	stechlisin B2	nrpspksdomains_steB_AMP-binding.3	leucine	leu	ETQAAQRADALAVVQGGQSLTYGQLNQRANRLAHHLLSLGVQPDDRIAVCVRRSPQMLVALLAILKSGAAYVPVDPAYPAERIAYLLADSAPLAVLAEASTRDCLGAVPVIDLDSRDWAQLPDSNPRVPTLTPAHLAYVIYTSGSTGQPKGVMVEHATLENLVHWHNRAFDLHAGSHTASVAGFGFDAMAWEVWPALCVGATLHLPPQTVSNEHLDELLAWWRAQPLQVSFLPTPVAEYAFSRDLGHPTLRTLLIGGDKLRQFPREQTFAVINNYGPTEATVVATSGVVEAGQVLHIGRPMANAKIYLLDDQQRPVPVGVAAELYVGGAGVARGYLHRPELSAERFLDDPFSDAPLARMYRTGDLARWLPDGTVEYLGRNDDQVKLR	GAGACTCAAGCGGCGCAACGCGCGGATGCGCTGGCCGTGGTGCAGGGCGGGCAATCGTTGACCTACGGCCAGCTCAATCAACGCGCCAACCGTCTGGCCCACCATCTGCTCAGCCTTGGCGTGCAGCCTGACGACCGCATCGCCGTGTGCGTGCGGCGCAGTCCGCAGATGCTGGTGGCGCTGCTGGCGATCCTCAAGTCGGGCGCCGCTTATGTGCCGGTCGACCCGGCGTACCCGGCGGAGCGCATTGCTTACCTGCTTGCGGACAGCGCTCCGTTGGCGGTTCTGGCCGAGGCCTCGACGCGTGATTGTCTCGGTGCCGTGCCGGTGATCGATCTCGATAGCCGTGACTGGGCGCAGCTGCCGGACAGCAATCCGCGAGTACCGACGCTGACCCCG…	CCCCC[C@H](O)CC(=O)N[C@H](CC(C)C)C(=O)N[C@H](CC(=O)O)C(=O)N[C@H]1C(=O)N[C@H](CC(C)C)C(=O)N[C@H](CC(C)C)C(=O)N[C@H](CO)C(=O)N[C@@H](CC(C)C)C(=O)N[C@H](CCC(N)=O)C(=O)N[C@@H](CC(C)C)C(=O)N[C@@H]([C@@H](C)CC)C(=O)N[C@@H](CCC(=O)O)C(=O)O[C@@H]1C	['Structure-based inference']	['doi:10.1021/acs.jnatprod.0c00263', 'doi:10.1046/j.1365-2672.2000.01201.x']
BGC0002092	NRP	Pseudomonas sp.	stechlisin B2	nrpspksdomains_steB_AMP-binding.4	serine	ser	FEAQVQRTPQAVAVVAGDQALSYTQLNERANRLAGHLISLGVQVDARVAICVERSLEMVIGLLAINKAGAAYVPLDPAYPSERLAYMLEDSAPAVVLVHGATRALLGDIAAPVVDLDQDTWQSLSADNPQIPALTPQHSAYVIYTSGSTGQPKGVVNEHTGVVNRLLWMQDAYRLNAADSVLQKTPFSFDVSVWEFFWPLMTGARLVMAQPGGHKDPHYLSEVIEREHITTLHFVPSMLDVFLANSDTTRCDSLRQVMCSGEALPGSLVRRFKLQLPGSGLHNLYGPTEAAVDVTAWACAGSIEQTPDNTPIGKPIANTRMYILDAQQQPVPQGVIGELYIAGVQVARGYLNRPQLTAERFLEDPFHPHGRMYRTGDVARYRPDGNIEYLGRNDDQVKIR	TTCGAAGCGCAGGTGCAGCGCACGCCGCAGGCTGTGGCCGTTGTCGCCGGTGATCAGGCATTGAGCTACACGCAGCTGAACGAGCGCGCCAACCGTTTGGCCGGGCATTTGATCAGCCTTGGCGTGCAGGTGGATGCGCGGGTGGCGATCTGCGTCGAACGCAGCCTGGAAATGGTCATCGGCCTGCTGGCGATCAACAAGGCCGGCGCCGCGTATGTGCCGCTGGACCCGGCCTATCCGTCGGAGCGCCTCGCTTACATGCTCGAGGACAGCGCGCCGGCCGTGGTGCTGGTGCACGGGGCGACTCGCGCGTTGCTGGGGGACATCGCCGCCCCCGTGGTCGATCTTGACCAGGACACTTGGCAATCGTTGTCTGCCGACAATCCGCAAATCCCGGCG…	CCCCC[C@H](O)CC(=O)N[C@H](CC(C)C)C(=O)N[C@H](CC(=O)O)C(=O)N[C@H]1C(=O)N[C@H](CC(C)C)C(=O)N[C@H](CC(C)C)C(=O)N[C@H](CO)C(=O)N[C@@H](CC(C)C)C(=O)N[C@H](CCC(N)=O)C(=O)N[C@@H](CC(C)C)C(=O)N[C@@H]([C@@H](C)CC)C(=O)N[C@@H](CCC(=O)O)C(=O)O[C@@H]1C	['Structure-based inference']	['doi:10.1021/acs.jnatprod.0c00263', 'doi:10.1046/j.1365-2672.2000.01201.x']
BGC0002092	NRP	Pseudomonas sp.	stechlisin B2	nrpspksdomains_steC_AMP-binding.1	leucine	leu	FEAQVAQRPEALAAVFADAQLTYAELNRHANALAHHLIERGVKPDDRVAIVARRGLDTLIGLVAILKAGAAYVPVDPAHPAERLHYLLSDSTPVLVLTQTGLRARLPALDVPVIDLDRCTWPLTCTFDPQVPGLTASHLAYVIYTSGSTGLPKGVMVEHQTLNNLVDWHCTAFDLCAGRHTSSLAGFGFDAMAWEVWPALCAGATLHLAPNHDGNEDIDALLAWWCAQLLDVSFLPTPVAEYAFSQNLEHPTLRTLLIGGDRLRQFNRNQHFDVINNYGPTEATVVATSGRVDSGDALHIGKPVSNATVYLLDEHLRPVPLGVAGELYVGGAGVARGYLNRPQMTAERFLRDPFSRLPNARMYRTGDLARWREDGTLEYLGRNDDQVKIR	TTTGAAGCTCAAGTTGCGCAGCGGCCGGAAGCGCTGGCGGCAGTGTTTGCCGATGCGCAATTGACCTACGCCGAGCTCAACCGTCACGCCAATGCCCTGGCGCATCATCTGATCGAGCGCGGCGTCAAACCCGATGATCGGGTGGCCATCGTCGCCCGCCGCGGTCTCGATACGCTGATCGGGCTGGTCGCCATTCTCAAGGCCGGCGCCGCTTACGTGCCGGTCGATCCGGCGCACCCTGCCGAGCGCTTGCACTATCTGCTCAGCGACAGCACTCCGGTTTTGGTCCTCACCCAAACCGGTCTGCGTGCGCGCTTGCCGGCGCTGGACGTACCGGTGATCGACCTCGACCGTTGTACCTGGCCACTGACCTGCACCTTCGACCCGCAGGTGCCGGGC…	CCCCC[C@H](O)CC(=O)N[C@H](CC(C)C)C(=O)N[C@H](CC(=O)O)C(=O)N[C@H]1C(=O)N[C@H](CC(C)C)C(=O)N[C@H](CC(C)C)C(=O)N[C@H](CO)C(=O)N[C@@H](CC(C)C)C(=O)N[C@H](CCC(N)=O)C(=O)N[C@@H](CC(C)C)C(=O)N[C@@H]([C@@H](C)CC)C(=O)N[C@@H](CCC(=O)O)C(=O)O[C@@H]1C	['Structure-based inference']	['doi:10.1021/acs.jnatprod.0c00263', 'doi:10.1046/j.1365-2672.2000.01201.x']
BGC0002092	NRP	Pseudomonas sp.	stechlisin B2	nrpspksdomains_steC_AMP-binding.2	glutamine	gln	FETQVLRTPDADAVVAGELRLSYAELNRRANQLAHHLRQCGVDSDARVAICVERGPELLVGLLAILKAGGAYVPLDPGYPAERLAYMLEDSAPVTVLVHAPTRALIGEWAGVRVDFDECNWQDLAQSNPQVPGLSAANLAYVIYTSGSTGKPKGVMVEHRNLGNLLHWSASLCPLSTGAALLQKTPLSFDASVWELFWPLSCGMRLVLAGPDDHRDPAALVQLIREQQVNVIQFVPALLQQFLEVEEVGECSSLTDVFCGGGELTAALVRSVRERLPQVRLHNVYGPTEATVDSTVWTLEPHSPVPQGAPPIGKPLCNTRVYILDAHQQLTPLGVVGEMYLGGVQVTRGYLNRPELTAERFLDDPFSDQPGARMYRTGDVARYLADGNIEYLGRNDDQV…	TTCGAGACGCAGGTGTTGCGCACGCCAGACGCGGATGCCGTGGTGGCCGGTGAGTTGCGTTTGAGTTACGCCGAGTTGAACCGTCGCGCCAACCAGCTCGCCCATCACCTGCGCCAGTGCGGTGTGGACAGTGATGCGCGGGTGGCGATCTGCGTCGAGCGCGGGCCGGAGTTGCTGGTCGGTCTGCTGGCGATTCTCAAGGCCGGCGGCGCTTATGTGCCGCTCGATCCGGGTTATCCCGCCGAACGTCTGGCCTACATGCTTGAGGACAGCGCACCCGTGACGGTGCTGGTGCATGCGCCGACGCGTGCGCTGATCGGCGAGTGGGCCGGCGTGCGGGTCGATTTCGACGAGTGCAACTGGCAAGACCTTGCGCAGAGCAATCCGCAGGTGCCAGGC…	CCCCC[C@H](O)CC(=O)N[C@H](CC(C)C)C(=O)N[C@H](CC(=O)O)C(=O)N[C@H]1C(=O)N[C@H](CC(C)C)C(=O)N[C@H](CC(C)C)C(=O)N[C@H](CO)C(=O)N[C@@H](CC(C)C)C(=O)N[C@H](CCC(N)=O)C(=O)N[C@@H](CC(C)C)C(=O)N[C@@H]([C@@H](C)CC)C(=O)N[C@@H](CCC(=O)O)C(=O)O[C@@H]1C	['Structure-based inference']	['doi:10.1021/acs.jnatprod.0c00263', 'doi:10.1046/j.1365-2672.2000.01201.x']
BGC0002092	NRP	Pseudomonas sp.	stechlisin B2	nrpspksdomains_steC_AMP-binding.3	leucine	leu	FESQVAERPQAIAAVFAGQPLTYLQLNRQANALAHHLIAMGVKADDRVAIVARRGLDTLVGLVAILKAGAGYVPIDPAHPAERIRYLLSDSAPVAVLTQSDLHQRLPLLSVPVIDVDLCAWPAQAQHNPAVPGLTAAHLAYVIYTSGSTGLPKGVMVEHQTLSNLVDWHCEAFNLRAGSHTSSLAGFGFDAMAWEVWPALCVGATVFLAPTHDGAEDVDGLLDWWRAQPLDVSFLPTPVAEYAFSQNLDHPTVHTLLIGGDRLRQFSRDQRFAVINNYGPTEATVVATSGRIEVGEALHIGKPVANAAVYLLDEQQRPVPMGVMGELYVGGAGVARGYLNRADLTAERFLRDPFSRTPNARMYRTGDLARWRDDGSLEYLGRNDDQVKIR	TTCGAGTCGCAGGTTGCCGAGCGTCCGCAGGCTATTGCAGCGGTGTTTGCCGGGCAGCCACTGACTTACTTGCAGCTCAATCGACAGGCCAATGCCCTGGCTCATCACTTGATCGCCATGGGGGTGAAAGCCGACGACCGTGTGGCCATCGTCGCCCGCCGGGGGCTGGATACATTGGTCGGGCTGGTCGCCATCCTCAAGGCAGGCGCTGGTTATGTGCCGATTGATCCGGCGCATCCCGCCGAGCGGATCCGTTATTTGCTCAGCGACAGCGCACCGGTCGCGGTGCTCACGCAAAGCGATCTGCACCAGAGACTGCCGCTGTTGAGCGTGCCAGTGATCGATGTCGACCTGTGTGCATGGCCGGCGCAGGCGCAGCACAACCCTGCGGTGCCGGGC…	CCCCC[C@H](O)CC(=O)N[C@H](CC(C)C)C(=O)N[C@H](CC(=O)O)C(=O)N[C@H]1C(=O)N[C@H](CC(C)C)C(=O)N[C@H](CC(C)C)C(=O)N[C@H](CO)C(=O)N[C@@H](CC(C)C)C(=O)N[C@H](CCC(N)=O)C(=O)N[C@@H](CC(C)C)C(=O)N[C@@H]([C@@H](C)CC)C(=O)N[C@@H](CCC(=O)O)C(=O)O[C@@H]1C	['Structure-based inference']	['doi:10.1021/acs.jnatprod.0c00263', 'doi:10.1046/j.1365-2672.2000.01201.x']
BGC0002092	NRP	Pseudomonas sp.	stechlisin B2	nrpspksdomains_steC_AMP-binding.4	isoleucine	ile	FQQQAAAHPKAVAAVHGAHSLSYFELNAQANRLAHHLIAHGVQPGDHVAILLPRSLELLVAQLAVAKCAAAYVPLDINAPGERQAFMVEDCRAVALLTLSSEVIDYVAPRIDLDTLTLNGQPTHNPNLVQSSEALAYIMYTSGSTGTPKGVMVPHRGIGRLVLNNGYADFNAQDRVVFASNPAFDASTMDIWGPLLNGGRVVIIDHQTLLDPNAFGRELNASGATILFVTTALFNQYVQLIPQSLKGLRILLCGGERGDPAAFRRLLAEAPALRIVHCYGPTETTTYATTFEVREVAENAESVPIGGPIGNTQVYVLDAYQQPVPMGVTGELYIGGQGVALGYLNRPDLTAEKFLCDPFSEMPGALLYRTGDLARWLAPGQLDCIGRNDDQVKIR	TTCCAACAGCAGGCTGCGGCGCATCCCAAAGCTGTGGCAGCGGTGCATGGCGCACATTCACTGAGCTACTTTGAGCTGAACGCCCAAGCCAACCGCCTGGCCCATCACCTGATCGCTCACGGCGTGCAGCCGGGCGACCACGTGGCGATCCTGCTGCCGCGTTCGCTGGAGTTGCTGGTGGCGCAACTGGCTGTTGCCAAATGCGCGGCGGCCTATGTGCCGCTGGACATCAATGCACCTGGCGAGCGCCAGGCGTTCATGGTCGAGGATTGCCGGGCGGTGGCGCTGCTGACCCTCAGCAGCGAAGTCATCGACTACGTCGCACCGCGCATCGATCTGGACACGCTGACCCTCAACGGCCAGCCGACGCATAACCCGAACCTTGTGCAGTCTTCCGAG…	CCCCC[C@H](O)CC(=O)N[C@H](CC(C)C)C(=O)N[C@H](CC(=O)O)C(=O)N[C@H]1C(=O)N[C@H](CC(C)C)C(=O)N[C@H](CC(C)C)C(=O)N[C@H](CO)C(=O)N[C@@H](CC(C)C)C(=O)N[C@H](CCC(N)=O)C(=O)N[C@@H](CC(C)C)C(=O)N[C@@H]([C@@H](C)CC)C(=O)N[C@@H](CCC(=O)O)C(=O)O[C@@H]1C	['Structure-based inference']	['doi:10.1021/acs.jnatprod.0c00263', 'doi:10.1046/j.1365-2672.2000.01201.x']
BGC0002092	NRP	Pseudomonas sp.	stechlisin B2	nrpspksdomains_steC_AMP-binding.5	glutamic acid	glu	FEAQVCRQPDAIAVQAGEHSLTYRELNARANRLAHHLREQGVGPDARVALCVERGFDLVVGLLGILKTGGAYVPLDPAYPVERLDFMLRDCAPVAVLVQTATRSLFAEAGAVLIDFDQCTWHDQSENDPQVSGLSPSNLAYMIYTSGSTGTPKGVMLEHRGLCNLVHWGSQICPPTRDGALLQKAPFSFDGSVWEFFWPLTAGVRLVLARPGGHREPAYLAQVIRQQRVTVVKFVPALLQQFVELQQVSECTSLTDIFCGGGELTAALAAAVRQHLPWVRLHNVYGPTEATVDSTAWTLEPHMPVPTSELPIGKAICNTRLYVLDAHDQAVPLGVIGQLHIGGIGVARGYMGLPQMQAERFIDSPFVAGDRLYRTGDLVRYRADGNLEFLGRNDFQVKL	TTCGAAGCACAGGTGTGTCGTCAGCCGGACGCCATCGCCGTGCAGGCAGGCGAGCACAGCCTGACGTATCGCGAATTGAATGCCCGCGCCAACCGCCTCGCGCATCATCTGCGCGAGCAAGGCGTGGGGCCGGATGCGCGGGTGGCGCTGTGCGTTGAGCGTGGATTCGATCTGGTGGTGGGGCTGCTCGGCATTCTCAAGACCGGTGGTGCATACGTGCCGCTGGATCCGGCTTATCCGGTGGAGCGCCTGGACTTTATGCTCAGGGATTGCGCGCCGGTGGCGGTGCTGGTTCAGACGGCCACCCGATCGCTGTTTGCCGAGGCTGGGGCGGTGCTGATCGACTTTGACCAATGCACCTGGCACGACCAGTCAGAAAACGATCCGCAGGTGTCTGGC…	CCCCC[C@H](O)CC(=O)N[C@H](CC(C)C)C(=O)N[C@H](CC(=O)O)C(=O)N[C@H]1C(=O)N[C@H](CC(C)C)C(=O)N[C@H](CC(C)C)C(=O)N[C@H](CO)C(=O)N[C@@H](CC(C)C)C(=O)N[C@H](CCC(N)=O)C(=O)N[C@@H](CC(C)C)C(=O)N[C@@H]([C@@H](C)CC)C(=O)N[C@@H](CCC(=O)O)C(=O)O[C@@H]1C	['Structure-based inference']	['doi:10.1021/acs.jnatprod.0c00263', 'doi:10.1046/j.1365-2672.2000.01201.x']
BGC0002351	NRP	Pseudomonas sp. SHC52	thanafactin A	nrpspksdomains_thf1_AMP-binding.1	valine	val	FEAQVRRRPEATALLDGEQSLSYRQLDRRAERLSGHLAACGIRAGDPVALALPRGMALIVSILAILKRGAAYVPIDRDAPLAHQARVLADCGSGWLLVEGDDRPAVQGVQLIDVAGSFEDAPNPPPQRTGAVAYIMYTSGSTGLPKGVQVPQRAVIRLVRNNGFADFSAQDRIALAANPAFDASTLEIWGALLNGGCLVVCPRQTVLDAERLNEHLLRHEVSVLWLTAGLFHQFADALAPAFAALRLLMVGGDVLDPRCIERVLRRSPPGQLLNGYGPTENTTFTTTHRITLEDALAGDIPIGRPIGNTQVYVLDEQCQAQPIGVAGELYIGGDGLALGYLNQAQLSEERFVANPFTPGTRLYRTGDLVRWRADGVLMFLGRNDLQVKVR	TTCGAAGCGCAGGTGCGGCGGCGTCCCGAAGCTACGGCACTGCTCGATGGCGAACAGTCGTTGAGCTACCGCCAGCTCGACCGTCGTGCCGAACGCCTGTCCGGGCACCTGGCGGCGTGTGGTATCAGGGCCGGTGACCCTGTGGCGCTGGCTTTGCCCCGCGGCATGGCGTTGATCGTGTCGATTCTGGCCATCCTCAAGCGCGGCGCCGCCTATGTGCCCATCGACCGGGATGCTCCCCTGGCCCATCAAGCGCGGGTACTGGCCGATTGTGGCAGTGGCTGGCTGCTGGTCGAAGGCGACGACAGGCCCGCGGTGCAAGGCGTGCAACTGATCGATGTCGCCGGATCATTCGAAGACGCGCCGAACCCGCCGCCGCAGCGCACCGGCGCTGTCGCC…	CCCCCCC[C@@H](O)CC(=O)N[C@@H](C(=O)N[C@H](C)C(=O)N[C@H](CCC(N)=O)C(=O)N[C@@H](C)C(=O)N[C@@H](C(=O)N[C@@H](C)C(=O)N1CCC[C@H]1C(=O)N[C@H](C(=O)O)[C@@H](C)O)C(C)C)C(C)C	['Structure-based inference', 'Sequence-based prediction']	['pubmed:33382250', 'doi:10.1021/acs.jnatprod.0c01174']
BGC0002351	NRP	Pseudomonas sp. SHC52	thanafactin A	nrpspksdomains_thf1_AMP-binding.2	alanine	ala	FEQQAALHPDRLAAQIDSAEETSLTYAQLNGRANQLAHALLAAGVCPDDRVAICLERGPLLLVAMLATLKAGAAYVPLDPAYPAARLLHMLEDSAPRLVLTSQAAHGRLPTSPDAAHWQLDSPPLADRLGALSLDNPKIPDLTSAHLAYVIYTSGSTGLPKGVMIEHRNACNLLHWALDNFQVEEMQLSLFATSINFDLAVFECFVPLAAGATLQLVDNALSLVAQPRAVTLINSVPSAVEQLARIDAIPATVRVINLAGEPLKAALVEQLFNRSAARRVCNLYGPTETTTYSTWLSMRREDGYLPGIGRPLDNTRIYLLDPHRQPVPLGVAGEIYIGGAGVARGYLNRSELTTERFLPDPFVDDPAARMYRTGDLGRWRADGHLEYLGRNDFQVKVR	TTCGAGCAGCAGGCGGCGCTGCATCCCGACCGGCTGGCGGCGCAGATCGATAGCGCCGAGGAGACGTCGCTCACCTATGCGCAACTCAATGGCCGCGCCAACCAACTGGCCCATGCCTTGCTGGCTGCCGGCGTATGCCCGGATGACCGGGTTGCGATCTGCCTCGAACGCGGCCCCCTGCTGCTGGTGGCCATGCTCGCCACCCTGAAGGCCGGCGCAGCCTACGTGCCGCTGGATCCGGCCTACCCGGCGGCGCGCCTGCTGCACATGCTCGAAGACAGTGCGCCGCGCCTGGTGCTCACCAGCCAGGCCGCGCACGGGCGCCTGCCGACGTCCCCAGACGCAGCCCATTGGCAGCTGGATTCGCCGCCGCTGGCGGACCGCCTGGGCGCCCTGTCC…	CCCCCCC[C@@H](O)CC(=O)N[C@@H](C(=O)N[C@H](C)C(=O)N[C@H](CCC(N)=O)C(=O)N[C@@H](C)C(=O)N[C@@H](C(=O)N[C@@H](C)C(=O)N1CCC[C@H]1C(=O)N[C@H](C(=O)O)[C@@H](C)O)C(C)C)C(C)C	['Structure-based inference', 'Sequence-based prediction']	['pubmed:33382250', 'doi:10.1021/acs.jnatprod.0c01174']
BGC0002351	NRP	Pseudomonas sp. SHC52	thanafactin A	nrpspksdomains_thf1_AMP-binding.3	glutamine	gln	FAEQVAATPDALAVIDEHQSLTFRELDRQASRLAHHLLDQGLRHGQFVAVCLERQAHAAVALLAVWKAGCAYVPMDPDYPASRLAYLLDDSAPAALITQEQVRNRLPAFTGGPLISLDAPGERGWLHAPAEAETAPGPQPADLAYMIYTSGSTGQPKGVMVEHRSVLNLWAGLRQRLDNLPANSRCSLNASMAFDASVQQLCQWLSGHCLVLIPKRIRLDAGALLDYLHQQQVTLFDCTPSQLQALLKHRQAQVQPQPLPSRILLGGEAVPAELWTQLANEAGVRVLNVYGPTECTVDTTSAWLDQHALPSLGQPLPNTQVQVLDAHGRRVPLGVVGEIHIGGRGVARGYWRREALTGERFLSDPFTREPDARLYRTGDLGRWESDGSLSYLGRTDFQV…	TTTGCCGAACAGGTCGCGGCGACGCCGGACGCCTTGGCGGTGATCGACGAGCATCAGTCCCTGACATTCCGTGAGCTCGACCGGCAAGCCAGCCGCCTGGCCCATCACCTGCTGGACCAAGGGCTGCGGCACGGTCAGTTCGTCGCTGTCTGCCTGGAGCGCCAGGCGCATGCGGCGGTCGCCCTGTTGGCGGTGTGGAAAGCCGGCTGTGCCTATGTGCCGATGGACCCCGACTACCCGGCCAGCCGCCTGGCCTATCTGCTGGACGACAGTGCCCCCGCGGCACTGATCACCCAGGAGCAGGTGCGCAACCGGCTGCCCGCCTTCACGGGCGGACCGTTGATCAGCCTCGACGCCCCTGGAGAACGTGGCTGGCTGCACGCTCCAGCAGAGGCAGAA…	CCCCCCC[C@@H](O)CC(=O)N[C@@H](C(=O)N[C@H](C)C(=O)N[C@H](CCC(N)=O)C(=O)N[C@@H](C)C(=O)N[C@@H](C(=O)N[C@@H](C)C(=O)N1CCC[C@H]1C(=O)N[C@H](C(=O)O)[C@@H](C)O)C(C)C)C(C)C	['Structure-based inference', 'Sequence-based prediction']	['pubmed:33382250', 'doi:10.1021/acs.jnatprod.0c01174']
BGC0002351	NRP	Pseudomonas sp. SHC52	thanafactin A	nrpspksdomains_thf2_AMP-binding.1	alanine	ala	LEQQAERQPEAIAARFDAAGGAAPLTYGQLNRQANRLAHLLLQTGVRPDSRVAICLERGPHLLVALLGILKAGAAYVPLDPAYPRERLAHMLDDSTPRALLTVAALQSNVAVGGGCTLLCLDDPQTEARLAEQPADNPKPVQLGLGGHHLAYVIYTSGSTGTPKGVMIEHRNACNLLNWALHAFDAASLRDSLFATSINFDLAVFEYFVPLAAGATLHVATNALALLDRPVPVTLINSVPSALDALVGAQAIPTSTQVVNLAGEPLKQGLVEQIFANSAVQRLCNLYGPSETTTYSTWVSMDRDQGFVPGIGRPLDNTRVYLLDAHRQLVPLGVSGEIYIGGAGVARGYLNRPALTEERFVQDPFANEAGARMYRTGDLGRWTPDGQLLYLGRNDFQVK…	CTGGAACAACAGGCCGAGCGTCAGCCCGAGGCCATCGCCGCACGTTTCGACGCCGCGGGCGGGGCCGCGCCGTTGACCTACGGACAACTCAACCGCCAGGCCAATCGCTTGGCCCACCTGTTGCTGCAAACCGGGGTTCGCCCCGACAGTCGCGTAGCGATTTGTCTTGAGCGTGGGCCGCACCTGCTGGTGGCCCTGCTGGGCATTCTCAAGGCTGGGGCGGCCTACGTCCCGCTGGACCCGGCCTACCCCCGCGAGCGCCTGGCGCACATGCTCGACGACAGCACCCCGCGGGCGTTGCTGACGGTCGCTGCGCTGCAATCGAACGTGGCCGTCGGCGGTGGCTGCACGCTGCTGTGCCTGGACGATCCGCAGACCGAGGCGCGTCTCGCCGAACAA…	CCCCCCC[C@@H](O)CC(=O)N[C@@H](C(=O)N[C@H](C)C(=O)N[C@H](CCC(N)=O)C(=O)N[C@@H](C)C(=O)N[C@@H](C(=O)N[C@@H](C)C(=O)N1CCC[C@H]1C(=O)N[C@H](C(=O)O)[C@@H](C)O)C(C)C)C(C)C	['Structure-based inference', 'Sequence-based prediction']	['pubmed:33382250', 'doi:10.1021/acs.jnatprod.0c01174']
BGC0002351	NRP	Pseudomonas sp. SHC52	thanafactin A	nrpspksdomains_thf2_AMP-binding.2	valine	val	FEAQARRRPDAPAIQDDAGAMSYRQLDQRAEQLAHWLAAQGIGEGARVALCLERGPRLIMAILAILKNGATYVPIDTATPAQRQRALLEDCASAWLLVDEWPDAPLDAAMACRVLVPWDSDLSLDDDAPQRQVNAAPANAPAYIMYTSGSTGVPKGVQVPHRAVTRLVRNNGFADFTAQDRIALAANPAFDASTLEIWGALLNGGCLVVCPRQTVLDAERLNEHLLRHEVSVLWLTAGLFHQFADALAPAFAALRLLMVGGDVLDPRCIERVLRRSPPGQLLNGYGPTENTTFTTTHRITLEDALAGDIPIGRPIGNTQVYVLDEQCQAQPIGVAGELYIGGDGLALGYLNQAQLSEERFVANPFTPGTRLYRTGDLVRWRADGVLMFLGRNDLQVKVR	TTCGAGGCCCAGGCTCGCCGCCGGCCCGACGCCCCGGCGATCCAGGACGACGCCGGCGCCATGAGTTACCGCCAGCTCGACCAGCGCGCCGAGCAACTGGCTCACTGGCTGGCCGCCCAGGGCATTGGCGAAGGCGCCCGGGTGGCGCTGTGCCTGGAGCGTGGCCCGCGCCTGATCATGGCAATCCTGGCAATCCTGAAAAATGGTGCGACCTACGTGCCCATCGACACCGCCACCCCGGCGCAGCGCCAGCGCGCCCTGCTCGAGGATTGCGCCAGCGCCTGGTTGCTCGTTGACGAATGGCCAGACGCGCCGCTGGACGCTGCCATGGCATGCCGGGTACTGGTCCCGTGGGACTCGGACCTGTCCCTGGATGATGATGCGCCCCAGCGTCAGGTC…	CCCCCCC[C@@H](O)CC(=O)N[C@@H](C(=O)N[C@H](C)C(=O)N[C@H](CCC(N)=O)C(=O)N[C@@H](C)C(=O)N[C@@H](C(=O)N[C@@H](C)C(=O)N1CCC[C@H]1C(=O)N[C@H](C(=O)O)[C@@H](C)O)C(C)C)C(C)C	['Structure-based inference', 'Sequence-based prediction']	['pubmed:33382250', 'doi:10.1021/acs.jnatprod.0c01174']
BGC0002351	NRP	Pseudomonas sp. SHC52	thanafactin A	nrpspksdomains_thf2_AMP-binding.3	alanine	ala	EAQARLTPAAVAVRCKGRELTYAQLERQANLLARHLQALGVGPDQRVGIHLRRSPELIVALFAVLKAGGAYVPLDPAYPAQRLAYMLEDSAPVAILAMGDAPLTLPLASDCQRLNVDEVLHGYDAPQGDAPLGAGLEPHHLAYMIYTSGSTGQPKGVMIEHRNARNFLDWALRSFSAQTLERSLFSTSINFDLSVFECFAPLSCGGTLELVDDALALLDQRPDLSLLNTVPSALDALLRADALSASLECVNLAGEALSRTLVERLFADSAVRQVNNLYGPTETTVYSTWVSMDRDRGFQPHIGRPIDNTQVHVLDEALQPLPVGVPGELYIGGAGVGRGYHRRPELTRERFLADPFSSDPTARLYRTGDLGFWDAEGQLHYLGRNDFQVKIR	GAAGCCCAGGCGCGTCTTACGCCTGCGGCCGTGGCGGTACGTTGCAAGGGTCGTGAGCTGACCTATGCCCAGCTGGAGCGTCAAGCCAATCTACTGGCTCGGCATCTGCAGGCACTCGGCGTCGGCCCCGACCAGCGAGTCGGTATCCATTTGCGCCGCAGCCCGGAACTGATCGTTGCGCTGTTCGCCGTGCTCAAGGCCGGCGGCGCCTATGTTCCGCTGGACCCGGCGTACCCGGCCCAGCGCCTGGCCTACATGCTCGAAGACAGCGCCCCGGTAGCAATCCTGGCGATGGGCGATGCGCCACTGACGCTGCCCCTCGCCAGCGATTGCCAGCGCCTGAACGTCGACGAGGTGCTGCACGGCTACGACGCACCGCAGGGCGACGCGCCGTTGGGC…	CCCCCCC[C@@H](O)CC(=O)N[C@@H](C(=O)N[C@H](C)C(=O)N[C@H](CCC(N)=O)C(=O)N[C@@H](C)C(=O)N[C@@H](C(=O)N[C@@H](C)C(=O)N1CCC[C@H]1C(=O)N[C@H](C(=O)O)[C@@H](C)O)C(C)C)C(C)C	['Structure-based inference', 'Sequence-based prediction']	['pubmed:33382250', 'doi:10.1021/acs.jnatprod.0c01174']
BGC0002351	NRP	Pseudomonas sp. SHC52	thanafactin A	nrpspksdomains_thf2_AMP-binding.4	proline	pro	FERQALLQPDAIAVELHGRGLSYGELDRQANHLAWAMIDQGAGPGQRVAIHLPRSLEMVLALVATLKTGAAYVPLDPSQPIARRQGIIDDCQPCLLLWDAERVEALQTGEGCRTLPVRLSATMTPAPAAPPLAQPRPDDLAYVMYTSGSTGLPKGVAMGHLALSNLLTWQAGQALPGAARTLQFAALGFDVAFQEMFSTLGSGGTLVLLDEARRLDLAALPQWLCDSRIERLFLPYIALAALAERWSEAPLALPALRDVIVAGEALRITAALRAFFRQHPQARLHNHYGPTETHVVCAHTLGDDPEQWADVPVIGRPIANTQVCLLDAHGQWVPQGAVGELHVAGPALAQGYLNRPDLTAERFIDHPLDQCGGARLYKTGDLARWTAEGTLQYLGRNDS…	TTCGAGCGTCAAGCGCTGCTGCAGCCTGACGCCATTGCCGTCGAACTGCATGGGCGCGGCTTGAGCTATGGGGAACTTGACCGCCAGGCCAACCACTTGGCCTGGGCAATGATCGACCAGGGCGCAGGGCCCGGCCAACGCGTGGCCATCCACCTGCCCCGTAGCCTGGAAATGGTGCTGGCCCTGGTTGCCACGCTCAAGACCGGGGCGGCCTACGTGCCGCTCGACCCCAGCCAGCCGATTGCCCGTCGGCAAGGCATCATCGACGATTGCCAGCCTTGCCTGCTGCTGTGGGACGCTGAGCGCGTCGAGGCCTTGCAGACTGGCGAAGGCTGCCGCACGTTGCCCGTCCGCCTCTCAGCCACCATGACACCCGCCCCCGCCGCACCACCGCTGGCG…	CCCCCCC[C@@H](O)CC(=O)N[C@@H](C(=O)N[C@H](C)C(=O)N[C@H](CCC(N)=O)C(=O)N[C@@H](C)C(=O)N[C@@H](C(=O)N[C@@H](C)C(=O)N1CCC[C@H]1C(=O)N[C@H](C(=O)O)[C@@H](C)O)C(C)C)C(C)C	['Structure-based inference', 'Sequence-based prediction']	['pubmed:33382250', 'doi:10.1021/acs.jnatprod.0c01174']
BGC0002351	NRP	Pseudomonas sp. SHC52	thanafactin A	nrpspksdomains_thf2_AMP-binding.5	threonine	thr	FEAQAARRGDAIALQYGTQTLSYRALNQRANRLAHRLRELGVGPDSRVAIHAERGLDMLVGILASLKAGGAYVPLDPVYPAQRLNFILDDSSPRVMLTLGALPPALQVPAACTVLSLDPHHGNWSEQPGTDLPADPQASDADLAYIIYTSGSTGVPKGVMVEHRSVLRLFSATEGWFGFNERDVWTLFHSFAFDFSVWEIWGALLHGGRLVVVPYLTSRSPQDFYDLLVEAGVTVLNQTPSAFYAWMKQTRAEPHHLRCIVFGGEALDGAALRPWFARPDSHRTQLVNMYGITETTVHVTYQPIEAADCNTDAGLVPIGRPIPDLRIYLLDEHGELVPQGVVGEIHVAGPGLARGYLNRPTLDAERFQPARFAGSRGERLYKTGDLARWTADGRLQYLG…	TTCGAGGCCCAGGCGGCGCGCCGAGGCGACGCCATAGCACTCCAATACGGCACGCAGACCCTCAGTTATCGGGCGCTCAACCAGCGCGCCAACCGCCTGGCTCATCGCCTACGAGAGCTGGGTGTGGGCCCGGACAGCCGCGTGGCGATCCACGCCGAGCGTGGCTTGGACATGCTCGTGGGCATCCTGGCCAGCCTCAAGGCCGGCGGCGCCTATGTGCCGCTGGACCCGGTCTATCCCGCACAACGCTTGAACTTCATTCTTGACGACAGCAGCCCCCGGGTGATGCTGACCCTCGGGGCATTACCGCCGGCGCTACAGGTGCCTGCCGCCTGCACGGTCCTGTCCCTGGACCCGCACCACGGGAACTGGAGCGAACAGCCCGGGACAGACCTGCCG…	CCCCCCC[C@@H](O)CC(=O)N[C@@H](C(=O)N[C@H](C)C(=O)N[C@H](CCC(N)=O)C(=O)N[C@@H](C)C(=O)N[C@@H](C(=O)N[C@@H](C)C(=O)N1CCC[C@H]1C(=O)N[C@H](C(=O)O)[C@@H](C)O)C(C)C)C(C)C	['Structure-based inference', 'Sequence-based prediction']	['pubmed:33382250', 'doi:10.1021/acs.jnatprod.0c01174']
BGC0002379	NRP	Pseudomonas sp. RtIB026	MA026	nrpspksdomains_PRtIB026_34650_AMP-binding.1	leucine	leu	EAQAALRAEATAAVHEGRHLSYAELNNRANQLATQLQALGVAPEQRVAVVARRGLDTLVGLLAVLKAGAAYVPIDPAHPGERLRYLLDDCAPKVVLTQSVLRERLPAIDVPVIELDRLPLPTAVLDDLEVPGLSGESLVYVIYTSGSTGQPKGVMIEQRMLANLVDWHCAAFDLHPGSATSSLAGFGFDAMAWEIWPTLCAGATLHLAPVGEGGEDIDALLRWWRAQPLQVSFLPTPVAEHAFAQGEAHPTLRTLLVGGDRLRRLAREQGWRIINNYGPTEATVVASAGEVRPGQVLHIGAPVANTRLHVLDAQGRQLPIGAVGELYIGGAGVARGYLNRPDLTAERFLDDPFTPQHGARMYRTGDLVRWLPDGTLEYLGRGDDQVKIR	GAGGCCCAGGCCGCGCTGCGCGCCGAGGCGACGGCCGCCGTGCACGAGGGGCGCCACCTGAGTTATGCCGAGCTGAACAACCGCGCCAATCAGCTGGCCACGCAACTGCAGGCCTTGGGCGTGGCGCCGGAGCAGCGGGTGGCGGTGGTCGCCCGCCGAGGCCTGGACACTCTGGTTGGCCTGTTGGCGGTGCTCAAGGCTGGCGCGGCCTATGTGCCGATCGATCCGGCGCACCCGGGCGAGCGTCTGCGCTACCTGCTCGACGATTGCGCACCAAAGGTGGTGCTGACCCAGTCCGTCCTGCGCGAGCGCTTGCCGGCCATCGATGTGCCGGTGATCGAGCTGGACCGCTTGCCATTGCCCACGGCAGTGCTTGATGACCTCGAGGTGCCTGGGCTA…	CCCCCCCC(O)CC(=O)N[C@@H](CC(C)C)C(=O)N[C@@H](CCC(=O)O)C(=O)N[C@@H](CCC(N)=O)C(=O)N[C@H](C(=O)N[C@@H](CC(C)C)C(=O)N[C@@H](CCC(N)=O)C(=O)NC1COC(=O)C(C(C)CC)NC(=O)C(CCC(N)=O)NC(=O)C(CC(C)C)NC(=O)C(CCC(N)=O)NC(=O)C(CC(C)C)NC(=O)C(CC(C)C)NC(=O)C(C(C)C)NC1=O)C(C)C	['Structure-based inference']	['pubmed:33533101']
BGC0002379	NRP	Pseudomonas sp. RtIB026	MA026	nrpspksdomains_PRtIB026_34640_AMP-binding.1	glutamic acid	glu	FAAQVRRTPDAVALQSEETQLTYRELDALANRLAHHLIGLGVRPDSRVAVCLERGASLIVGLLGVLKAGGAYVPLDPGYPDERLHYMLADSAPLALLVHGATRGLFEGLSTPLVDLDHGDWQGHGDPAPELPELGGGHLAYVMYTSGSTGTPKGVMVEHRGLCNLMRWGSELCPPQADDALLQRAPFSFDGSVWELFWPLCAGLRLVLARPDGHRDPAYLVQLIQTRRVTTVKFVPALLQAFLDTPGVERCSSLRDVFCGGGELTLALAQQVRQALPQVRLHNVYGPTEATVDSTAWTLEPRQPLPAVAPPIGRAIGNTRLYVLDAHDRPVPVGCAGELHIGGIGVARGYLGLPTLQAERFIASPFVAGDRLYRTGDLVRYRADGELEFIGRNDFQVKL	TTCGCCGCCCAGGTGCGACGCACGCCGGATGCCGTGGCGCTGCAGAGCGAAGAGACACAGCTCACCTACCGCGAGCTCGATGCCCTGGCCAACCGGCTGGCCCATCACCTGATCGGCCTGGGCGTGCGGCCCGACAGCCGGGTCGCCGTGTGCCTGGAGCGCGGCGCCTCGCTGATTGTTGGCTTGCTCGGCGTGCTCAAGGCCGGTGGCGCCTATGTGCCGCTGGACCCCGGCTACCCCGACGAACGCCTGCACTACATGCTTGCCGACAGCGCGCCCCTGGCACTGCTGGTGCACGGAGCCACCCGCGGCCTGTTCGAGGGCCTGTCGACACCGCTGGTGGACCTGGATCACGGTGACTGGCAGGGGCATGGCGACCCTGCGCCCGAACTGCCGGAA…	CCCCCCCC(O)CC(=O)N[C@@H](CC(C)C)C(=O)N[C@@H](CCC(=O)O)C(=O)N[C@@H](CCC(N)=O)C(=O)N[C@H](C(=O)N[C@@H](CC(C)C)C(=O)N[C@@H](CCC(N)=O)C(=O)NC1COC(=O)C(C(C)CC)NC(=O)C(CCC(N)=O)NC(=O)C(CC(C)C)NC(=O)C(CCC(N)=O)NC(=O)C(CC(C)C)NC(=O)C(CC(C)C)NC(=O)C(C(C)C)NC1=O)C(C)C	['Structure-based inference']	['pubmed:33533101']
BGC0002379	NRP	Pseudomonas sp. RtIB026	MA026	nrpspksdomains_PRtIB026_33980_AMP-binding.1	glutamine	gln	FEHQAQARPSAVALEADGERLSYRQLDEQANRLAHHLIELGVKPDDRVAICIERGVSMVVGLLAILKAGGAYVPLDPGYPAGRIRHMLEDSAPLAVLVHSATREVAGEVAVPQVDLDQPTWEALPATRPRVAGLTPRHLAYVIYTSGSTGTPKGVMVEHRSVVNLVRWAAGLCPTSADGALLHKTPISFDASVWELFWPLGSGLRLVLARADGQRDADYVAREIIERQVSVVQFVPALLQQFVEQARSAQCTSLTDIVCGGGELTESLARQVRERLPQVRLHNVYGPTETTVDCTVFTLEPGQPVPHGALPIGRPIDNTRLYVLDDADQPLPWGVAGHLHIGGAGVARGYLGLAGQQAERFIDSPFVEGERLYRSGDLVRQRADGNLAFIGRNDHQVKLR	TTCGAACACCAGGCGCAGGCGCGCCCCAGCGCCGTTGCGCTGGAGGCCGATGGCGAGCGACTGAGCTATCGCCAACTCGACGAGCAGGCCAACCGCCTGGCCCATCACCTGATCGAACTTGGGGTAAAACCTGACGACCGGGTGGCGATCTGCATCGAGCGCGGCGTGTCGATGGTGGTCGGCCTGCTGGCCATCCTCAAGGCGGGTGGCGCCTACGTGCCGCTCGATCCGGGTTACCCGGCCGGGCGCATCCGTCATATGCTCGAAGACAGCGCGCCGCTGGCGGTGCTGGTCCACAGCGCTACCCGCGAGGTAGCGGGCGAGGTGGCGGTACCGCAGGTCGACCTCGACCAGCCGACCTGGGAAGCCTTGCCGGCCACCCGCCCACGGGTGGCCGGG…	CCCCCCCC(O)CC(=O)N[C@@H](CC(C)C)C(=O)N[C@@H](CCC(=O)O)C(=O)N[C@@H](CCC(N)=O)C(=O)N[C@H](C(=O)N[C@@H](CC(C)C)C(=O)N[C@@H](CCC(N)=O)C(=O)NC1COC(=O)C(C(C)CC)NC(=O)C(CCC(N)=O)NC(=O)C(CC(C)C)NC(=O)C(CCC(N)=O)NC(=O)C(CC(C)C)NC(=O)C(CC(C)C)NC(=O)C(C(C)C)NC1=O)C(C)C	['Structure-based inference']	['pubmed:33533101']
BGC0002379	NRP	Pseudomonas sp. RtIB026	MA026	nrpspksdomains_PRtIB026_33980_AMP-binding.2	valine	val	FEAQAVNSPDALAAVHGQRRWTFAQLESQANRLAYYLLEQGVRAGDRVALLLPRSFDLLAAQLAVSKCAAVFVPLDGNAPVERQAFMVADSQARLLLTHSDQPQVEGARRVELDRLDLSGYADAPLGLAVDAGSAAYIMYTSGSTGTPKGVQVPHRAIVRLVINNGFADFNSQDRVAFASNPAFDASTLEVWAPLLNGGAVVVVDQDTVLSRQGLREVLLEQGVTVLWLTAGLFHQFADDLLPAFRGLRYLMVGGDVLDPTVITRVLREGAPQHLLNGYGPTEATTFSTTHDITEVGEGSIPIGKPIGNSRCYVLDARQQLLPVGVVGELYIAGDGVALGYLGQPELTAERFLPDPFNGGTMYRSGDLVSWQADGTLRYLGRADQQVKLR	TTCGAAGCCCAGGCCGTGAATTCACCGGATGCACTGGCGGCAGTCCATGGTCAGCGTCGATGGACTTTTGCCCAGCTTGAGTCCCAGGCCAATCGTCTGGCCTATTACCTGCTTGAACAGGGCGTTCGGGCCGGTGACCGCGTGGCCTTGCTGCTGCCTCGCTCGTTCGATCTGCTGGCGGCCCAGCTGGCCGTGAGCAAGTGCGCGGCGGTGTTCGTGCCGCTGGACGGTAATGCGCCCGTCGAGCGTCAGGCGTTCATGGTGGCCGACAGCCAGGCGCGGTTGCTGCTGACCCACAGCGACCAGCCGCAAGTGGAGGGGGCGCGCCGGGTCGAACTCGACCGCCTCGACCTGAGCGGCTACGCGGATGCGCCGTTGGGCCTGGCGGTGGACGCCGGC…	CCCCCCCC(O)CC(=O)N[C@@H](CC(C)C)C(=O)N[C@@H](CCC(=O)O)C(=O)N[C@@H](CCC(N)=O)C(=O)N[C@H](C(=O)N[C@@H](CC(C)C)C(=O)N[C@@H](CCC(N)=O)C(=O)NC1COC(=O)C(C(C)CC)NC(=O)C(CCC(N)=O)NC(=O)C(CC(C)C)NC(=O)C(CCC(N)=O)NC(=O)C(CC(C)C)NC(=O)C(CC(C)C)NC(=O)C(C(C)C)NC1=O)C(C)C	['Structure-based inference']	['pubmed:33533101']
BGC0002379	NRP	Pseudomonas sp. RtIB026	MA026	nrpspksdomains_PRtIB026_33970_AMP-binding.1	leucine	leu	AQSPEALAVVQGELSLSYGELNERANRLAHHLIERGVVLGDRVALCLERGPQRLVAMLAVLKAGAAYVPIDPGYPAQRIAYLLSDSAPALVLVESATEALVGDAAKVMLDGDDWLGHAASNPVVAGLDQNQLAYVIYTSGSTGQPKGVMVEHRTLANLIHWHCQAFELGEGSHTSSVAGFGFDAMAWEAWPALSTGAVLHLPPASIGGEHVDELLDWWLEQPLQVSFLPTPVAEQALRRERQHPTLRTLLVGGDRLRQFDRDPGFALVNNYGPTESTVVATSGQLQPGGALHIGKPTANTRVYVLDEQRQPVPVGVTGELYIGGAQVARGYLNRPELTAERFLDDPFNGGRMYRTGDLVRWNADGTLDYQGRNDDQVKIR	GCTCAATCGCCCGAAGCATTGGCCGTTGTACAGGGTGAGCTGAGTCTGAGCTACGGCGAACTCAACGAGCGTGCCAACCGCCTGGCTCATCATCTGATCGAGCGTGGCGTGGTCCTGGGCGACCGCGTGGCGCTATGTCTGGAACGTGGCCCGCAACGGTTGGTGGCGATGCTGGCCGTGCTCAAGGCCGGGGCGGCGTATGTGCCGATCGATCCGGGTTATCCGGCGCAGCGGATTGCCTATCTGCTCAGCGACAGTGCTCCGGCGTTGGTGCTGGTCGAATCGGCCACCGAAGCGTTGGTCGGCGATGCAGCCAAAGTCATGCTGGATGGCGATGACTGGCTCGGCCACGCGGCCAGCAACCCTGTGGTTGCAGGGCTGGACCAGAATCAGCTGGCC…	CCCCCCCC(O)CC(=O)N[C@@H](CC(C)C)C(=O)N[C@@H](CCC(=O)O)C(=O)N[C@@H](CCC(N)=O)C(=O)N[C@H](C(=O)N[C@@H](CC(C)C)C(=O)N[C@@H](CCC(N)=O)C(=O)NC1COC(=O)C(C(C)CC)NC(=O)C(CCC(N)=O)NC(=O)C(CC(C)C)NC(=O)C(CCC(N)=O)NC(=O)C(CC(C)C)NC(=O)C(CC(C)C)NC(=O)C(C(C)C)NC1=O)C(C)C	['Structure-based inference']	['pubmed:33533101']
BGC0002379	NRP	Pseudomonas sp. RtIB026	MA026	nrpspksdomains_PRtIB026_33970_AMP-binding.2	glutamine	gln	FEQQVARDPEAIAVQSDDGQLSYRQLNAEANRLAHHLIALGVRPDDRVAICVERGLPLVVGLLAILKAGGAYVPLDPDYPAERIGHMLADSQPRALLVQQGTRTLVGEAAVPQVDLDQPCWAEQPDSDPRVPGLNGAHLAYVIYTSGSTGLPKGVMVEHRNLANLVHWSARRFPAGGAVLHKTPVSFDASVWELFWPLCSGLRLVLAKPDGQRDPQYLAGLIRQQQVGVVQFVPALLQQFLDQDDSAACASLSDIVCGGGELTEVLARQVRQRLPQVRLHNVYGPTETTVDCSAWTLEPGQPIPPGALPIGQPIDNTRLYVLDAHDQPVPWGVAGQLHIGGAGVARGYLGLPEQQAERFIASPFVEGERLYRSGDRVRQAADGSLTFLGRTDHQIKLR	TTCGAGCAGCAGGTGGCGCGCGATCCCGAGGCGATCGCCGTGCAGTCTGACGACGGACAACTCAGCTATCGCCAGCTCAACGCCGAGGCCAATCGCCTGGCCCACCACCTGATCGCACTGGGCGTGCGGCCCGACGACCGGGTGGCAATCTGTGTCGAGCGCGGCCTGCCGCTGGTGGTCGGCCTGCTGGCGATCCTCAAGGCCGGCGGTGCCTATGTGCCGCTGGACCCGGACTACCCGGCAGAACGTATCGGCCACATGCTCGCCGACAGTCAGCCGCGAGCGCTGCTGGTGCAACAAGGCACGCGGACGCTGGTCGGCGAAGCGGCGGTGCCGCAGGTCGATCTCGATCAACCGTGCTGGGCCGAGCAACCGGACAGCGACCCACGGGTACCTGGG…	CCCCCCCC(O)CC(=O)N[C@@H](CC(C)C)C(=O)N[C@@H](CCC(=O)O)C(=O)N[C@@H](CCC(N)=O)C(=O)N[C@H](C(=O)N[C@@H](CC(C)C)C(=O)N[C@@H](CCC(N)=O)C(=O)NC1COC(=O)C(C(C)CC)NC(=O)C(CCC(N)=O)NC(=O)C(CC(C)C)NC(=O)C(CCC(N)=O)NC(=O)C(CC(C)C)NC(=O)C(CC(C)C)NC(=O)C(C(C)C)NC1=O)C(C)C	['Structure-based inference']	['pubmed:33533101']
BGC0002379	NRP	Pseudomonas sp. RtIB026	MA026	nrpspksdomains_PRtIB026_33970_AMP-binding.3	serine	ser	EAQVRRTPTAVAVRAEEGELTYRQLDEQANRLAHHLIALGVKPDARVALCLERGLSMVVGLLAILKAGGAYVPVDPDYPAERIRHMLDDSAPLAVLVHGATRDVPQASPATLIDLDRPTWQAQPAHAPQVPGLTPRHLAYVIYTSGSTGLPKGVMNEHAGVVNRLLWMQDAYQLGAGDVVLQKTPFSFDVSVWEFLWPLQTGARLVMARPGGHRDPEYLRAVIREEQVSTLHFVPSMLDVFLAHGEVLAHQLKRVLCSGEALPGSLVRRFHAQLPTVELHNLYGPTEAAVDVSAWHCVTAPDSTPIGKPIANTALYVLDAQGQPVPVGVAGELYIGGMQVARGYLNREQLTAERFLDDPFSLRAGGRMYRTGDLARYLADGNLEYLGRNDDQVKIR	GAGGCTCAGGTTCGACGCACCCCGACCGCTGTGGCGGTGAGGGCGGAGGAAGGCGAGCTGACCTATCGCCAGCTCGACGAGCAGGCCAACCGCCTGGCCCATCACCTGATTGCGCTGGGGGTAAAACCCGACGCGCGCGTGGCGCTCTGCCTCGAGCGCGGCCTGTCGATGGTGGTCGGCCTGCTGGCCATCCTCAAGGCCGGTGGCGCCTACGTGCCGGTCGACCCGGACTACCCGGCCGAGCGCATCCGCCACATGCTCGATGACAGCGCGCCGCTGGCGGTGCTGGTGCACGGTGCCACCCGCGACGTGCCGCAGGCGAGCCCGGCGACGCTGATCGACCTCGACCGACCGACCTGGCAGGCACAGCCGGCGCATGCCCCACAGGTGCCCGGGCTG…	CCCCCCCC(O)CC(=O)N[C@@H](CC(C)C)C(=O)N[C@@H](CCC(=O)O)C(=O)N[C@@H](CCC(N)=O)C(=O)N[C@H](C(=O)N[C@@H](CC(C)C)C(=O)N[C@@H](CCC(N)=O)C(=O)NC1COC(=O)C(C(C)CC)NC(=O)C(CCC(N)=O)NC(=O)C(CC(C)C)NC(=O)C(CCC(N)=O)NC(=O)C(CC(C)C)NC(=O)C(CC(C)C)NC(=O)C(C(C)C)NC1=O)C(C)C	['Structure-based inference']	['pubmed:33533101']
BGC0002379	NRP	Pseudomonas sp. RtIB026	MA026	nrpspksdomains_PRtIB026_33970_AMP-binding.4	valine	val	FEAQAMASPDALAVAHGTRRWSYQALDRQASRLAGYLLEQGVQAGDRVALLLPRSFDLLAAQLAVSKCAAVFVPLDGNAPVERQAFMVADSQARLVLTHSDQPQVDGARRVELDRLDLSGYADAPLGLAVDAGSAAYIMYTSGSTGTPKGVQVPHRAIVRLVINNGFADFNRQDRVAFASNPAFDASTLEVWAPLLNGGAVVVVDQDTVLSRQGLREVLLEQGVTVLWLTAGLFHQFADDLLPVFRGLRYLMVGGDVLDPAVIARVLRDGAPQHLLNGYGPTEATTFSTTHEITEVGEGSIPIGKPIGNSRCYVLDARQQLLPVGAVGELYIAGDGVAMGYLGQPELTAERFLPDPFNGGTMYRSGDLVSWQADGTLRYLGRADQQVKLR	TTCGAGGCGCAGGCCATGGCCAGCCCGGATGCACTGGCGGTGGCCCATGGCACGCGGCGCTGGAGCTACCAGGCGCTCGACCGGCAGGCCAGCCGGCTGGCCGGGTACCTGCTGGAGCAGGGGGTACAGGCGGGTGACCGCGTGGCCTTGCTGTTGCCTCGCTCGTTCGATCTGCTGGCGGCCCAGCTGGCCGTGAGCAAGTGCGCGGCGGTGTTCGTGCCGCTGGACGGCAATGCGCCGGTCGAGCGTCAGGCGTTCATGGTGGCCGACAGCCAGGCGCGGTTGGTGCTGACCCACAGCGACCAGCCCCAGGTGGACGGCGCACGCCGAGTCGAACTCGACCGCCTCGACCTGAGCGGTTATGCCGATGCGCCGTTGGGCCTGGCGGTGGACGCCGGC…	CCCCCCCC(O)CC(=O)N[C@@H](CC(C)C)C(=O)N[C@@H](CCC(=O)O)C(=O)N[C@@H](CCC(N)=O)C(=O)N[C@H](C(=O)N[C@@H](CC(C)C)C(=O)N[C@@H](CCC(N)=O)C(=O)NC1COC(=O)C(C(C)CC)NC(=O)C(CCC(N)=O)NC(=O)C(CC(C)C)NC(=O)C(CCC(N)=O)NC(=O)C(CC(C)C)NC(=O)C(CC(C)C)NC(=O)C(C(C)C)NC1=O)C(C)C	['Structure-based inference']	['pubmed:33533101']
BGC0002379	NRP	Pseudomonas sp. RtIB026	MA026	nrpspksdomains_PRtIB026_33970_AMP-binding.5	leucine	leu	AQSPEALAVVQGELSLSYGELNERANRLAHHLIERGVVLGDRVALCLERGPQRLVAMLAVLKAGAAYVPVDPGYPEQRIAYLLSDSAPALVLVESATEALVGDAAKVMLDGDGWLDHAASNPVVAGLDENQLAYVIYTSGSTGQPKGVMVEHRTLANLIHWHCQAFELDEGSHTSCVAGFGFDAMAWEAWPALCTGAVLHLPPASIGGEHVDELLDWWLEQPLQVSFLPTPVAEQALRRERQHPTLRTLLVGGDRLRQFDRDPGFALVNNYGPTETTVVATSGQLQPGGALHIGKPTANTRVYVLDEQRQPVPVGVTGELYIGGAQVARGYFKRPELTAERFLDDPFNGGRMYRTGDLVRWNVDGTLDYQGRNDDQVKIR	GCCCAGTCGCCCGAAGCATTGGCCGTAGTACAGGGCGAGCTGAGTCTGAGCTATGGAGAACTCAATGAGCGCGCCAACCGCCTGGCTCATCATCTGATCGAGCGTGGCGTGGTCCTGGGCGACCGCGTGGCGCTGTGTCTGGAACGTGGCCCGCAACGGTTGGTGGCGATGCTGGCCGTGCTCAAGGCCGGGGCGGCGTATGTGCCGGTCGATCCGGGTTATCCGGAGCAGCGGATTGCCTACCTGCTCAGCGACAGTGCGCCAGCGCTGGTGCTGGTCGAATCGGCCACCGAAGCGTTGGTCGGCGATGCAGCCAAAGTCATGCTGGATGGCGATGGCTGGCTCGACCACGCGGCCAGCAATCCTGTGGTTGCAGGGCTGGACGAGAATCAGCTGGCT…	CCCCCCCC(O)CC(=O)N[C@@H](CC(C)C)C(=O)N[C@@H](CCC(=O)O)C(=O)N[C@@H](CCC(N)=O)C(=O)N[C@H](C(=O)N[C@@H](CC(C)C)C(=O)N[C@@H](CCC(N)=O)C(=O)NC1COC(=O)C(C(C)CC)NC(=O)C(CCC(N)=O)NC(=O)C(CC(C)C)NC(=O)C(CCC(N)=O)NC(=O)C(CC(C)C)NC(=O)C(CC(C)C)NC(=O)C(C(C)C)NC1=O)C(C)C	['Structure-based inference']	['pubmed:33533101']
BGC0002379	NRP	Pseudomonas sp. RtIB026	MA026	nrpspksdomains_PRtIB026_33970_AMP-binding.6	glutamine	gln	FEAQALRTPEAVALSAEQGELSYEQLNAQANRLAHHLIALGVRPDDRVAICVERGLSLVVGLLAILKASGAYVPLDPDYPVERIRHMLVDSQPRAVLVQAATRALMGDLPLTQVDLDLADSIREPEHNPQVPGLAAANLAYVIYTSGSTGLPKGVMVEHRNVVNLVHWSAGLFPGEGALLHKTPVSFDASVWELFWPLCSGVRLVLAKPDGQRDPQYLAELIHQQQVGVVQFVPALLQQFLEHEASAACASLTDIVCGGGELTEALVHQVRERLPRARLHNVYGPTETTVDCSVCTLHPQDPLTSGAMPIGRPIDNTRLYVLDGHDQPVPLGVAGQLHIGGAGVARGYLGLPEQQAERFIASPFADGERLYRSGDRVRQRPDGSLEFLGRTDHQIKLR	TTCGAGGCCCAGGCCTTGCGCACGCCCGAGGCTGTTGCGCTCAGCGCCGAACAGGGTGAACTCAGCTACGAGCAGCTCAACGCCCAGGCCAACCGCCTGGCCCATCACCTGATCGCGCTGGGCGTGCGGCCCGACGACCGGGTGGCGATCTGTGTCGAGCGCGGTCTGTCGCTGGTGGTCGGCCTGCTGGCCATCCTCAAGGCCAGTGGCGCCTATGTGCCACTGGACCCTGACTATCCGGTCGAACGGATCCGCCACATGCTGGTCGACAGCCAGCCACGGGCGGTCCTGGTGCAGGCGGCCACCCGGGCGCTGATGGGGGATCTGCCACTGACCCAGGTCGATCTCGACCTGGCGGACTCGATCCGTGAGCCGGAGCACAACCCGCAGGTGCCGGGC…	CCCCCCCC(O)CC(=O)N[C@@H](CC(C)C)C(=O)N[C@@H](CCC(=O)O)C(=O)N[C@@H](CCC(N)=O)C(=O)N[C@H](C(=O)N[C@@H](CC(C)C)C(=O)N[C@@H](CCC(N)=O)C(=O)NC1COC(=O)C(C(C)CC)NC(=O)C(CCC(N)=O)NC(=O)C(CC(C)C)NC(=O)C(CCC(N)=O)NC(=O)C(CC(C)C)NC(=O)C(CC(C)C)NC(=O)C(C(C)C)NC1=O)C(C)C	['Structure-based inference']	['pubmed:33533101']
BGC0002379	NRP	Pseudomonas sp. RtIB026	MA026	nrpspksdomains_PRtIB026_33960_AMP-binding.1	leucine	leu	EAVAQAHPHALAATANDQSLTYQHLNQRANALAHHLIGLGVRPDDRVAVFARRGLDTLIGLVAVLKAGAGYVPVDPAHPDERVRYLLDDSAPVAVLTQQALRGRLDGITVPVLALDQPDWPQRLDDPAVADLGPEHLAYVIYTSGSTGQPKGVMVEHRTLNNLVDWHCRAFDLCLGRHTSSLAGFGFDAMAWEVWPALCAGATLHLAPAGEGHEDLDALLAWWRAQPLDVSFLPTPVAEYAFSHQLGHPTLRTLLIGGDRLRQFNRTQTFAVVNNYGPTETTVVASSGVVEAGGALHIGGPVDNARLYVLDAGLQPVALGVAGELYIGGAGVARGYLGRPQLTAERFLDDPFVATPGARMYRTGDLVRWLADGTLDYLGRNDDQVKIR	GAGGCCGTGGCCCAGGCCCATCCCCACGCCCTGGCCGCCACTGCCAATGACCAGTCGCTGACTTATCAGCACCTGAACCAGCGCGCCAATGCCCTGGCTCACCACCTGATCGGCCTCGGCGTGCGCCCCGATGACCGCGTGGCAGTGTTCGCCCGTCGTGGCCTGGACACGCTGATTGGCCTGGTCGCGGTGCTCAAGGCCGGCGCCGGCTACGTGCCGGTGGACCCGGCCCATCCGGACGAGCGTGTGCGCTACCTGCTCGACGACAGCGCGCCAGTGGCCGTGCTGACCCAACAAGCGTTGCGCGGCCGCCTGGATGGGATCACGGTGCCGGTGCTGGCGCTCGATCAGCCTGACTGGCCGCAGCGGCTGGATGATCCAGCCGTCGCCGACCTGGGA…	CCCCCCCC(O)CC(=O)N[C@@H](CC(C)C)C(=O)N[C@@H](CCC(=O)O)C(=O)N[C@@H](CCC(N)=O)C(=O)N[C@H](C(=O)N[C@@H](CC(C)C)C(=O)N[C@@H](CCC(N)=O)C(=O)NC1COC(=O)C(C(C)CC)NC(=O)C(CCC(N)=O)NC(=O)C(CC(C)C)NC(=O)C(CCC(N)=O)NC(=O)C(CC(C)C)NC(=O)C(CC(C)C)NC(=O)C(C(C)C)NC1=O)C(C)C	['Structure-based inference']	['pubmed:33533101']
BGC0002379	NRP	Pseudomonas sp. RtIB026	MA026	nrpspksdomains_PRtIB026_33940_AMP-binding.1	leucine	leu	EAQAARAPQALAAVAGDARLSYGELNQRANALAYHLIERGVGPDDRVAVVARRGLDTLVALLAVLKAGGAYVPVDPAHPDERLRYLLEDSAPVVVLAQQALLARLDGLAVPVLALDRPDWPARTDNPELPGLLASHLAYVIYTSGSTGQPKGVMVEHRTLANLVHWHCKAFELGAGEHTASVAGFGFDAMAWEVWPALCAGAVLHLPPAELGNEQLDGLLAWWLEQPLKVAFLPTPVAEYAFTQGLRHPTLRTLLIGGDRLRQFTRDPGCVVVNNYGPTEATVVATSGLVLPGGALDIGRPIANARVYLLDEARQLVPCGVTGELYVGGVGVARGYLNRAHLTAERFLDDPFSEQPGARMYRTGDLACWNADGTLDYLGRNDDQVKVR	GAGGCCCAGGCGGCCCGTGCCCCGCAGGCGCTGGCCGCCGTGGCCGGCGATGCACGCCTGAGCTACGGCGAGCTGAACCAGCGCGCCAACGCCCTGGCCTATCACCTGATCGAACGCGGCGTAGGGCCCGATGACCGGGTCGCGGTGGTCGCCCGGCGCGGCCTGGATACCCTGGTGGCGCTGCTGGCGGTGCTCAAGGCCGGTGGCGCCTATGTACCGGTGGACCCGGCGCATCCGGATGAGCGCCTGCGCTACCTGCTCGAGGACAGCGCCCCCGTGGTGGTCCTGGCCCAGCAGGCGTTGCTGGCACGCCTGGACGGGTTGGCCGTGCCTGTGCTGGCCCTGGACCGGCCGGACTGGCCGGCGCGCACGGACAATCCCGAGCTGCCCGGCCTGCTG…	CCCCCCCC(O)CC(=O)N[C@@H](CC(C)C)C(=O)N[C@@H](CCC(=O)O)C(=O)N[C@@H](CCC(N)=O)C(=O)N[C@H](C(=O)N[C@@H](CC(C)C)C(=O)N[C@@H](CCC(N)=O)C(=O)NC1COC(=O)C(C(C)CC)NC(=O)C(CCC(N)=O)NC(=O)C(CC(C)C)NC(=O)C(CCC(N)=O)NC(=O)C(CC(C)C)NC(=O)C(CC(C)C)NC(=O)C(C(C)C)NC1=O)C(C)C	['Structure-based inference']	['pubmed:33533101']
BGC0002379	NRP	Pseudomonas sp. RtIB026	MA026	nrpspksdomains_PRtIB026_33940_AMP-binding.2	glutamine	gln	FEAQVARMPQALALQAEDGQMSYRQLNEAANRLAHQLIAQGVVADSRVAVCLARGPQLLVGLLAVLKAGGAYVPLDPGYPDERLAYMLADSAPLALLVDAGSRGRFIDSAVPRLDLDQPTWTGQSPDNPQVSGLGARHLAYVIYTSGSTGTPKGVMVEHRSLCNLVHWSSRLIAPTVEGALLHKTPVSFDASVWELFWPLCAGLRLVLARPDGQRDPAYLAALIQQQRVNVVQFVPALLQQFLALEASAACDSLTDIVCGGGELTTALLQQVRERLPQVRLHNVYGPTEATVDCSVWTLEPGQPLPESAPPIGRPIANTRLYVLDRNGLPVPRGVVGELHIGGVGVARGYLGLPELDAERFGDSPFVVGERLYRSGDLVRRRADGELEFLGRDDFQVKL	TTCGAGGCGCAGGTGGCGCGTATGCCGCAGGCGTTGGCGCTGCAGGCCGAGGACGGCCAGATGAGCTACCGGCAACTGAACGAGGCGGCCAACCGCCTGGCCCATCAGCTGATCGCCCAGGGCGTGGTCGCCGACAGCCGGGTCGCGGTGTGCCTGGCCCGTGGGCCGCAACTGCTGGTCGGGCTGCTGGCGGTGCTCAAGGCCGGCGGCGCCTACGTGCCGCTGGACCCGGGCTACCCCGACGAGCGCCTGGCCTACATGCTTGCCGACAGCGCGCCGCTGGCGTTGCTGGTGGATGCCGGCAGCCGCGGGCGCTTTATCGACAGTGCCGTGCCACGCCTGGACCTTGACCAGCCGACCTGGACCGGCCAGTCGCCGGACAATCCGCAGGTGAGCGGC…	CCCCCCCC(O)CC(=O)N[C@@H](CC(C)C)C(=O)N[C@@H](CCC(=O)O)C(=O)N[C@@H](CCC(N)=O)C(=O)N[C@H](C(=O)N[C@@H](CC(C)C)C(=O)N[C@@H](CCC(N)=O)C(=O)NC1COC(=O)C(C(C)CC)NC(=O)C(CCC(N)=O)NC(=O)C(CC(C)C)NC(=O)C(CCC(N)=O)NC(=O)C(CC(C)C)NC(=O)C(CC(C)C)NC(=O)C(C(C)C)NC1=O)C(C)C	['Structure-based inference']	['pubmed:33533101']
BGC0002379	NRP	Pseudomonas sp. RtIB026	MA026	nrpspksdomains_PRtIB026_33940_AMP-binding.3	isoleucine	ile	FEQQVARHPLALAARHDERQLTYGELNEQANRLAHWLIGEGVAAGDPVAILLPRSLPLLVAQLAVLKCAAIYVPLDINAPAERQAFMVQDCQAVALLTLGSLAAECEARRIDLDCLALDDQPAHNPNLAQDADAVAYVMYTSGSTGTPKGVRVSHRGITRLVLNNGYADFDASDRFAFVSNPAFDAATLDVWGGLLNGGQVLVIDHQTLVEPTQFATALRQGGASVMFVTTALFNQYVQLIPEALAGLRVLLCGGERGEPASFRALLARAPNLRLVHCYGPTETTTFATACTVRAVADGAEHVPIGGPIGNTTAYVLDAHGRLLPEGVTGELYIGGDGVALGYLNRPQLTAERFLDDPFGAGPGARLYRTGDLARWRDDGQLECLGRTDDQVKIR	TTCGAGCAGCAGGTGGCGCGGCACCCGCTGGCGCTGGCGGCGCGCCACGATGAACGCCAGCTCACCTATGGCGAGCTCAACGAGCAGGCCAACCGCCTGGCCCATTGGCTGATCGGCGAGGGCGTGGCGGCAGGTGACCCGGTGGCGATCCTGCTGCCGCGTTCGTTGCCCTTGCTGGTGGCGCAACTGGCCGTGCTCAAGTGCGCGGCCATCTATGTGCCGCTGGACATCAACGCCCCGGCCGAACGCCAGGCGTTCATGGTCCAGGACTGCCAGGCCGTGGCGCTGCTGACCCTCGGCAGCCTGGCGGCGGAATGCGAGGCGCGGCGCATCGACCTGGACTGCCTGGCCCTCGACGACCAGCCGGCGCACAACCCGAACCTGGCGCAGGACGCCGAC…	CCCCCCCC(O)CC(=O)N[C@@H](CC(C)C)C(=O)N[C@@H](CCC(=O)O)C(=O)N[C@@H](CCC(N)=O)C(=O)N[C@H](C(=O)N[C@@H](CC(C)C)C(=O)N[C@@H](CCC(N)=O)C(=O)NC1COC(=O)C(C(C)CC)NC(=O)C(CCC(N)=O)NC(=O)C(CC(C)C)NC(=O)C(CCC(N)=O)NC(=O)C(CC(C)C)NC(=O)C(CC(C)C)NC(=O)C(C(C)C)NC1=O)C(C)C	['Structure-based inference']	['pubmed:33533101']
BGC0002719	NRP	Pseudomonas fluorescens	thanafactin A	nrpspksdomains_G7W60_10810_AMP-binding.1	valine	val	FEAQVRLRPQATALQDDRQSLSYRQLDQRAEWLAGHLTAQGVKAGDKVALYLGRGAGLIVSILAILKRGAAYVPVDRDAPAAHLARVLADSGSAWLLCEHGPALSVAGVLTLDLDELPSEAPPVPPQASGANDVAYVMYTSGSTGVPKGVQVPHRAITRLVRNNGFADFNAQDRIALAANPAFDASTLEIWGALLNGGCLVVCPRDTLLDAARFNEHLLRHEVSVLWLTAGLFHQFAEPLAPAFAALRYLMVGGDVLDPRRIAQVLRHSPPQHLLNGYGPTESTTFATTHRITLEDALAGDIPIGKPIGNTQVYVLDDQRRPLPIGVAGELYIGGDGLALGYLNQPQLSEQRFVPHPFDPTPGARLYRTGDLARWRADGVLLFLGRNDFQVKIR	TTCGAGGCGCAGGTCCGACTTCGTCCCCAAGCCACGGCGCTGCAGGACGACAGGCAGTCGCTGAGCTATCGCCAGCTCGACCAGCGCGCCGAGTGGCTGGCCGGACACCTGACGGCACAGGGAGTCAAGGCCGGTGACAAGGTCGCGTTATACCTGGGCCGAGGCGCGGGGCTGATCGTGTCGATACTGGCGATCCTGAAACGCGGCGCGGCCTATGTGCCGGTGGATCGCGACGCTCCCGCCGCGCATCTGGCAAGGGTACTGGCCGACAGCGGCAGCGCCTGGCTGCTGTGCGAACACGGGCCCGCATTGTCGGTGGCAGGCGTCCTGACCCTCGACCTCGACGAACTGCCCAGCGAAGCCCCCCCTGTTCCACCGCAGGCAAGCGGTGCGAACGAT…	[]	['Structure-based inference', 'Sequence-based prediction']	['pubmed:33382250', 'doi:10.1021/acs.jnatprod.0c01174']
BGC0002719	NRP	Pseudomonas fluorescens	thanafactin A	nrpspksdomains_G7W60_10810_AMP-binding.2	alanine	ala	FERQAALWPDAVAAHIETASAGTTTLTYGQLNRQANRLAHALLATGLRPDDRVAICLERGPHMLVALLATLKAGAAYVPLDPTYPPARLRHMLEDSAPRLVLSSDALRTRLPANTAIERWDLDTPQLQARLDAQPIDNPDAADLNAAHLAYVIYTSGSTGMPKGVMIEHRNACNLLHWALRSFDVDELHHSLFATSINFDLAVFECFVPLAAGATLHLVDNALALVERLRTVSLINSVPSAVEELVRIGAIAPTTRVVNLAGEPLKARLVEQLFAQGATDRVCNLYGPTETTTYSTWLSMSREQGFLPGIGQPLDNTRIYLLDRHRQPVPLGVAGEIHIGGAGVARGYLNRAELTAERFLPDPFVSDPEARMYRTGDLGRWRADGHLEYLGRNDFQVKVR	TTCGAGCGCCAGGCCGCCTTGTGGCCCGATGCCGTGGCCGCCCATATCGAAACCGCGTCAGCCGGCACGACCACGCTCACCTATGGCCAGCTCAATCGCCAGGCCAACCGGTTGGCCCACGCCCTGCTGGCGACCGGGTTGCGACCCGACGACCGGGTGGCGATCTGCCTGGAGCGTGGTCCGCACATGCTGGTGGCGTTACTGGCCACCCTGAAGGCCGGCGCTGCCTACGTCCCCCTGGACCCGACCTATCCGCCGGCACGCCTGCGGCACATGCTGGAAGACAGCGCCCCGCGCCTGGTGCTCAGCAGTGACGCATTGCGCACGCGCCTACCGGCTAACACCGCAATCGAGCGATGGGACCTGGACACGCCGCAGCTACAGGCCCGGCTGGACGCC…	[]	['Structure-based inference', 'Sequence-based prediction']	['pubmed:33382250', 'doi:10.1021/acs.jnatprod.0c01174']
BGC0002719	NRP	Pseudomonas fluorescens	thanafactin A	nrpspksdomains_G7W60_10810_AMP-binding.3	glutamine	gln	FAEQAARTPDALAVIDEHQALSFRQLNEQANRLAHHLRTLGVQSGQLVAVCLEREVQLAIALLAVWKAGCAYVPLDPDYPAPRLAYMLNDSAPAALLTQERVRPRLPTFTGGPLLSLDAPESLAWTQASADDPDAIALGQQPTDLAYLIYTSGSTGQPKGVMVEHHSVLNLWAGLRQRLDDLPPGTRCSLNASVAFDASVQQLCQWLSGHCLVLIPKRVRLDASALLDYLHSRQVTLFDCTPTQLQVLLKHRQAAQTRQPLPRRILLGGEAVPSELWTQLAAEAEVRVLNVYGPTECTVDTTSAWLDSHSTPSLGQPLPNTQVHVLDRHGRRVPVGVAGEIHIGGHGVARGYWQRAALTDERFLSDPFTAQAGGRLYRTGDLGRWEEDGSLSYLGRTDF…	TTCGCCGAACAGGCTGCGCGCACCCCCGATGCCTTGGCCGTCATCGACGAACACCAGGCATTGAGCTTCCGCCAGCTCAACGAACAGGCCAACCGGCTGGCTCATCACTTGCGCACCCTGGGTGTGCAGAGCGGCCAGCTCGTCGCCGTGTGCCTGGAGCGCGAGGTGCAGTTGGCGATTGCCCTGCTGGCGGTGTGGAAAGCCGGTTGCGCCTATGTGCCGCTGGATCCTGACTACCCGGCGCCCCGGCTGGCCTACATGCTCAACGACAGCGCACCGGCGGCCCTGCTCACCCAGGAACGGGTGCGTCCTCGTTTACCGACCTTTACGGGTGGACCACTGCTCAGCCTTGACGCGCCCGAATCCCTGGCCTGGACCCAGGCCAGCGCGGACGACCCG…	[]	['Structure-based inference', 'Sequence-based prediction']	['pubmed:33382250', 'doi:10.1021/acs.jnatprod.0c01174']
BGC0002719	NRP	Pseudomonas fluorescens	thanafactin A	nrpspksdomains_G7W60_10815_AMP-binding.1	alanine	ala	VERQAQRQPQAIAARFDAANGASPLTYEALNTQANRLAHLLLQAGVEPDSRVAICLERGPHLLIALLGILKAGAAYVPLDPAYPRERLLHMLADSTPRALLTLGPLQSSVPAPAGCEVLCLDAAPVKARLAEQPVHDPDPASLGLTSAHLAYVIYTSGSTGTPKGVMIEHRNACNLLHWALHAFDTASLRDSLFATSINFDLAVFEYFVPLAAGATLHVATNALALLDRPVPVTLINSVPSALDALVNAQAIPGSTQVVNLAGEPLKQSLVEQVFAHSAVQRLCNLYGPSETTTYSTWVSMSREQGFVPGIGRPLDNTQVYILDAHRQLVPQGVVGELYIGGAGVARGYLNRPELTQERFVDDPFALQAGARMYRTGDLGRWTADGQLLYLGRNDFQIK…	GTGGAGCGGCAGGCCCAGCGGCAACCCCAGGCCATCGCCGCCCGTTTCGACGCCGCCAACGGTGCCAGCCCCCTGACCTATGAGGCGCTCAATACCCAGGCCAATCGGCTGGCGCACTTGCTGCTGCAGGCCGGTGTCGAGCCGGACAGCCGCGTGGCGATCTGCCTGGAGCGTGGCCCCCACCTGCTGATCGCCCTGCTCGGCATTCTCAAGGCCGGTGCCGCCTATGTGCCGCTGGACCCGGCCTACCCGCGGGAACGCCTGCTGCACATGCTCGCCGACAGCACGCCTCGTGCGCTGCTGACACTCGGCCCGCTGCAATCGAGCGTCCCGGCGCCCGCCGGTTGCGAAGTGCTTTGCCTGGACGCGGCCCCTGTCAAGGCGCGCCTGGCCGAACAA…	[]	['Structure-based inference', 'Sequence-based prediction']	['pubmed:33382250', 'doi:10.1021/acs.jnatprod.0c01174']
BGC0002719	NRP	Pseudomonas fluorescens	thanafactin A	nrpspksdomains_G7W60_10815_AMP-binding.2	valine	val	FEAQVKRRPEATAIQTGEQSLSYRQLDERASRLAGWLAEHGVVPGARVALCLARGPRLIVAILAILKNGAAYVPIDTATPSERRRNLLHDCGSAWLLVDEPHSIPADPAVQSLALATWEDTLDSAAAPAPDVPRPADATACVMYTSGSTGVPKGVQVPHRAITRLVRNNGFADFNAQDRIALAANPAFDASTLEIWGALLNGGCLVVCPRDTLLDAARFNEHLLRYEVSVLWLTAGLFHQFAEPLAPAFAALRYLMVGGDVLDPRRIAQVLRHSPPQHLLNGYGPTESTTFATTHRITLEDALAGDIPIGKPIGNTQVYVLDDQRRPLPIGVAGELYIGGDGLALGYLNQPQLSEQRFVPHPFDPTPGARLYRTGDLARWRADGVLLFLGRNDFQVKIR	TTCGAGGCGCAGGTCAAGCGGCGGCCCGAGGCGACGGCGATCCAGACCGGCGAGCAGTCCCTGAGCTATCGCCAGCTCGATGAGCGCGCCAGCCGACTGGCCGGTTGGCTGGCCGAACACGGCGTGGTGCCGGGCGCCCGGGTTGCCCTGTGCCTTGCCCGTGGCCCACGGTTGATCGTGGCGATCCTGGCGATCCTGAAAAACGGCGCGGCCTATGTGCCCATCGACACGGCCACGCCCTCGGAGCGGCGCCGCAATCTGCTGCACGATTGCGGCAGCGCCTGGTTGCTGGTGGACGAACCGCACTCGATCCCCGCGGACCCAGCCGTCCAATCCCTTGCCTTGGCGACCTGGGAAGACACCCTGGACAGCGCCGCGGCGCCCGCCCCGGATGTACCG…	[]	['Structure-based inference', 'Sequence-based prediction']	['pubmed:33382250', 'doi:10.1021/acs.jnatprod.0c01174']
BGC0002719	NRP	Pseudomonas fluorescens	thanafactin A	nrpspksdomains_G7W60_10815_AMP-binding.3	alanine	ala	FEAQARLTPAADAVRCDARVLSYGQLDQQATRLARHLRALGVGPDARVGIHLRRSPELIVALLAVLKAGGAYVPLDPAYPAQRLAYMLDDSAPVAILTTSDAPLDLVLAADCQRLDVDRALRSDETDATALAPALEAPALESRHLAYMIYTSGSTGQPKGVMIEHGNARNFLDWALRSFDPQTLEHSLFSTSINFDLSVFECFVPLSCGGVLELVDDALALLERRPALSLLNTVPSAADALLRADALPASLQTLNLAGEALPRHLVERLFADSEVRRVNNLYGPTETTVYSTWVSMDREQGFVPHIGRPIDNTQVHVLDEALQPLPIGVMGELYIGGAGVGRGYHRRPELTRERFLADPFSDDPAARLYRTGDLGFWDADGQLHYLGRNDFQVKIR	TTCGAAGCCCAGGCGCGTCTCACTCCCGCGGCCGACGCGGTGCGCTGCGACGCGCGCGTGCTCAGCTATGGGCAACTCGATCAGCAGGCCACTCGCCTGGCCCGGCACCTGCGGGCACTGGGGGTAGGCCCCGACGCTCGGGTCGGCATCCACCTGCGGCGCAGCCCGGAACTGATCGTCGCGCTGCTCGCCGTGCTCAAGGCCGGCGGCGCCTATGTGCCCCTGGACCCGGCCTATCCCGCGCAACGCCTGGCCTACATGCTCGATGACAGCGCGCCGGTGGCGATACTGACCACGAGCGATGCGCCACTGGACCTTGTCCTTGCCGCTGACTGCCAGCGCCTCGATGTGGACCGCGCACTGCGCAGCGACGAGACGGACGCCACAGCGTTGGCACCG…	[]	['Structure-based inference', 'Sequence-based prediction']	['pubmed:33382250', 'doi:10.1021/acs.jnatprod.0c01174']
BGC0002719	NRP	Pseudomonas fluorescens	thanafactin A	nrpspksdomains_G7W60_10815_AMP-binding.4	proline	pro	FERRALEQPDAIAVELHGRGLSYAELDRQANHLAWRMIEQGAGTGQRVAIHLPRSLEMVLAVVATLKTGAAYVPLDPSQPLARRQGIVEDCQPCLLLWDDQRVEGLRVGDTCTPLSVRLAVTADQALAAPPLGQPSLSDLAYVMYTSGSTGLPKGVAMGHLALSNLLAWQAAQALPGPARTLQFAALGFDVAFQEIFSTLGSGGTLVLLEEAQRLDLAALPHWLAQERIERLFLPYIALAGLADNWASDPVELPALRDVVVAGEALRITGPLRELFKRHPRARLHNHYGPTETHVVCTHTLPDAPEQWADVPAIGRPIANTQVCLLDANGHWVPQGVAGELHVAGVALAQGYLNRPDLTAERFIAHPFDAAPGARLYKTGDLARWTAEGTLQYLGRNDS…	TTCGAACGCAGGGCACTGGAGCAGCCCGACGCTATCGCGGTCGAGTTGCATGGGCGCGGGCTGAGCTACGCCGAGCTCGACCGTCAGGCCAATCACCTGGCCTGGCGGATGATCGAACAAGGGGCCGGCACCGGCCAGCGGGTGGCCATCCACCTGCCGCGCAGCCTGGAGATGGTGCTGGCAGTGGTTGCCACGCTCAAGACCGGGGCGGCCTATGTGCCGCTCGATCCCAGTCAGCCCCTGGCTCGTCGCCAGGGCATCGTCGAGGATTGCCAGCCGTGCCTGCTGCTGTGGGATGACCAGCGTGTCGAAGGGCTGCGAGTCGGCGACACGTGCACGCCGCTGTCGGTTCGACTGGCGGTTACGGCGGACCAGGCCCTTGCCGCGCCGCCACTTGGA…	[]	['Structure-based inference', 'Sequence-based prediction']	['pubmed:33382250', 'doi:10.1021/acs.jnatprod.0c01174']
BGC0002719	NRP	Pseudomonas fluorescens	thanafactin A	nrpspksdomains_G7W60_10815_AMP-binding.5	threonine	thr	FEAQVASRGDAVAVQFGTQSLSYRALNERANRLAHRLRELGVGPDDRVAILAERGLDLLVGILATLKAGGAYVPLDPVYPAQRLNFMLDDSAPQVLLALEALPATVRAPASCVTVSLDPDAGGWSHLPGANPASDPRASDTDLAYIIYTSGSTGEPKGVMIEHRAVLRLFSATDAWFGFNDQDVWTLFHSFAFDFSVWEIWGALLHGGRLVVVPYLTSRSPEDFYRLVVETGVTVLNQTPSAFYAWMKHTGGEPHRLRYVIFGGEALDGAALRPWFDRPDSQATRLVNMYGITETCVHVTYQLIEPALCATDAGLVPIGRPIPDLRVYLLDAEGELVPRGVVGELHIAGPGLARGYLNRAVLDAERFQPARFAGGHGERLYKTGDLARWTADGVLQYLG…	TTCGAGGCCCAGGTGGCTAGCCGTGGCGACGCGGTGGCGGTTCAGTTCGGGACGCAGAGCTTGAGCTACCGGGCGCTCAACGAACGGGCCAATCGCCTGGCCCATCGCCTGCGCGAGCTGGGCGTGGGCCCGGATGACCGCGTGGCGATCCTGGCCGAGCGGGGTCTCGACCTTTTGGTCGGCATCCTCGCCACCCTCAAGGCCGGAGGCGCCTATGTGCCCCTGGATCCGGTCTATCCGGCGCAGCGCCTGAATTTCATGCTCGACGACAGCGCGCCGCAGGTGCTCCTGGCCCTCGAAGCACTGCCGGCTACAGTGCGGGCGCCGGCATCGTGCGTCACCGTTTCGCTGGACCCGGACGCCGGTGGCTGGAGCCATCTGCCTGGGGCGAACCCGGCA…	[]	['Structure-based inference', 'Sequence-based prediction']	['pubmed:33382250', 'doi:10.1021/acs.jnatprod.0c01174']
