# Supplementary material for: Feature sequence-based genome mining uncovers the hidden diversity of bacterial siderophore pathways
Source: eLife. 2024 Oct 1;13:RP96719. doi: 10.7554/eLife.96719 (PMC11444679; doi:10.7554/eLife.96719)
Supplement: Supplementary file 5. [file elife-96719-supp5.xlsx]

## Sheet: Sheet1
Fig_label	BGC_idx	BGC_type	spname	product	domain_id	MIBIG substrate	MIBIG_short	TRUE	Ref	aaseq	dnaseq	structure	evidences	publications
1	BGC0001509	NRP	Pseudomonas fluorescens	anikasin	nrpspksdomains_A8O26_RS13975_AMP-binding.1	isoleucine	ile	leu	['pubmed:28846366']	FESRVAEQPDAVVATYQGRSLSYAELNRQANALAHHLLGLGVRPDDRVAIVARRGLETLVGLLAILKAGAAYVPIDPAHPPERLSYLLSDSAPVALLTQSDVRERLPAIALPVIELDRREWALDSVTDPEVAGLNPGNLAYVIYTSGSTGLPKGVMVEHRTLANLVDWHCAAFGLGPGQHTSSLAGFGFDAMAWEVWPALCAGATLHFSPATEGSEDIDALLAWWRAQPLDVSFLPTPIAEYAFSKQLDHPTLRTLLIGGDRLRQFNRAQGFAVVNNYGPTEATVVATSGLITPGQALHIGKPVSNATAYLLDEQQRPVPIGIIGELYVGGAGVARGYLNRPQLTAERFLDDPFNTQPGARMYRTGDLARWRADGNLEYIGRNDDQVKVR	TTCGAGTCGCGGGTGGCCGAACAGCCGGACGCCGTGGTCGCGACTTATCAGGGGAGGTCGCTGAGTTACGCCGAGCTCAACCGGCAAGCCAATGCGCTGGCCCATCATCTGCTGGGCCTCGGCGTACGGCCCGATGACCGGGTGGCGATTGTCGCCCGCAGAGGCCTGGAAACCCTGGTCGGGCTGCTGGCGATTCTCAAGGCTGGCGCCGCTTATGTGCCGATTGACCCGGCGCATCCACCCGAACGCCTGAGTTATCTGCTCAGCGACAGCGCTCCGGTGGCGCTGCTGACGCAAAGCGATGTGCGCGAGCGTTTGCCTGCCATAGCGCTGCCAGTGATTGAGCTTGATCGGCGCGAGTGGGCGCTCGACAGCGTCACCGATCCCGAGGTTGCCGGG…		['Structure-based inference', 'Mass spectrometry']	['pubmed:28846366']
2	BGC0001509	NRP	Pseudomonas fluorescens	anikasin	nrpspksdomains_A8O26_RS13965_AMP-binding.3	threonine	thr	leu	['pubmed:28846366']	FEQQVAERPHAPAVIFAGARLSYAELDHQANALAHHLIEAGVRPDDRVAIVARRGLDTLVGLVAILKAGAGYVPVDPAHPAERLNYLLEDSAPVAVLTQSTLRARLPELQVPLIDLDLHQWPNSRIDTPSVPALTPQHLAYVIYTSGSTGQPKGVMVEHRTLSNLLDWHCAAFDLHAGSHTSSLAGFGFDAMAWEVWPALCVGATLHLAPAHDGNEDIDALLDWWRAQPLDVSFLPTPVAEYAFSQEQAHPTLKTLLIGGDRLRQFNRTQSFKVINNYGPTEATVVATSGLIEAGQVLHIGKPVSNASVYLLDEQQRPVPLGVMGELYVGGAGVARGYLNRPLMTAERFLHDPFSRLPNARMYRTGDLARWREDGTLEYLGRNDDQVKIR	TTCGAGCAGCAAGTGGCTGAGCGACCGCACGCGCCGGCGGTGATTTTTGCTGGCGCGCGCCTGAGTTATGCCGAACTCGACCACCAGGCCAACGCCTTGGCGCATCACCTGATCGAAGCGGGTGTGCGGCCTGATGATCGCGTGGCCATCGTTGCCCGTCGCGGGCTCGATACCCTGGTCGGATTGGTGGCGATTCTCAAGGCGGGCGCCGGTTATGTGCCGGTGGACCCGGCGCATCCAGCGGAGCGCCTGAACTATCTGCTGGAGGACAGCGCGCCGGTTGCCGTGTTGACCCAAAGCACACTGCGCGCACGTCTGCCCGAGCTGCAAGTGCCGCTGATCGACCTTGATCTGCACCAGTGGCCAAACAGCAGAATCGACACGCCGTCAGTGCCCGCG…		['Structure-based inference', 'Mass spectrometry']	['pubmed:28846366']
3	BGC0001509	NRP	Pseudomonas fluorescens	anikasin	nrpspksdomains_A8O26_RS13970_AMP-binding.3	serine	ser	leu	['pubmed:28846366']	EAQAEQQPDSLAVVQGMQQLTYAQLNQRANRLAHHLLGLGVQPDDRIAVCLRRSPDMLVALLAILKAGAGYVPVDPAYPAERIAYLLQDSAPMAVLAQASTADLLGAVPLIDLDNPTWQQLSDSNPQLPTLTPAHLAYVIYTSGSTGQPKGVMVEHATLENLVHWHCEAFDLRAGSHTSSVAGFGFDAMAWEVWPALCVGATLHLPPESVSNEHLDELLQWWRAQPLQVSFLPTPVAEYAFTRDLGHPTLRTLLIGGDKLRQLPREQTFAVINNYGPTEATVVATSGAVEAGQVLHIGRPMANAKIYLLDEQQRPVPVGVAGELYVGGAGVARGYLHRPELTAERFLDDPFSDEPQARMYRTGDLARWLADGSVEYLGRNDDQVKLR	GAGGCTCAGGCCGAGCAGCAGCCGGATTCACTGGCAGTGGTTCAGGGCATGCAGCAACTGACCTACGCGCAACTCAATCAGCGTGCCAATCGCCTGGCCCATCACTTGCTCGGGCTCGGCGTGCAGCCCGATGACCGCATCGCCGTGTGCCTGCGCCGCAGCCCGGACATGCTCGTCGCGTTGCTGGCGATCCTCAAGGCCGGCGCCGGTTATGTGCCGGTCGACCCGGCGTACCCGGCGGAACGCATCGCCTATCTGTTGCAGGACAGCGCGCCGATGGCGGTGCTGGCACAGGCTTCGACCGCTGATTTGCTCGGCGCAGTGCCGCTGATTGATCTGGACAATCCCACCTGGCAACAGCTGTCCGACAGCAATCCGCAACTGCCGACGCTGACCCCG…		['Structure-based inference', 'Mass spectrometry']	['pubmed:28846366']
4	BGC0001509	NRP	Pseudomonas fluorescens	anikasin	nrpspksdomains_A8O26_RS13965_AMP-binding.5	leucine	leu	asp	['pubmed:28846366']	FEAQVRAKPEAIAVQSEAGRLSYRELNARANQLAHHLREQGVEPDSRVAICVERGLDLVVGLLGILKAGGAYVPLDPGYPAERLTYMLKDSAPVAVLVQAATRSLFDAPAMTFIDLDQGHWQQLPADDPQVPGLSAANLAYMIYTSGSTGLPKGVMIEHRSACNMVHWGSQISAPTEHGALLQKAPFSFDSSVWEIFWPLCSGLRLVLARPDGNRDSAYVVQAIREHHVTVVKFVPALLQDFIEQADVSQCTSLTDVLNGGGELSAALARQVRDRLPWVRLHNVYGPTETTVDSTGWTLEPDQPVPHNAVPIGQGLSNTRLYVLDAYDQPVPQGVSGQLHIGGVGVARGYHGLPQMQAERFIDSPFVAGDRLYRTGDLARYNNDGDLEFLGRNDFQIKLR	TTTGAAGCGCAGGTACGGGCTAAACCCGAGGCCATCGCCGTGCAGTCCGAAGCTGGGCGGCTTTCCTATCGGGAACTCAATGCACGGGCCAATCAACTGGCCCATCACTTGCGCGAACAGGGCGTGGAGCCGGATTCACGCGTGGCGATTTGCGTCGAGCGCGGGCTGGATCTGGTGGTCGGTCTGCTCGGCATTCTAAAGGCCGGCGGGGCGTATGTGCCGCTGGATCCGGGATATCCGGCGGAACGTCTGACCTACATGCTCAAGGACAGCGCGCCGGTCGCGGTGCTGGTGCAAGCGGCGACGCGTTCGCTGTTCGACGCGCCTGCAATGACCTTCATCGACCTCGATCAAGGTCATTGGCAACAACTGCCCGCTGACGATCCGCAGGTGCCGGGC…		['Structure-based inference', 'Mass spectrometry']	['pubmed:28846366']
5	BGC0001509	NRP	Pseudomonas fluorescens	anikasin	nrpspksdomains_A8O26_RS13970_AMP-binding.4	leucine	leu	ser	['pubmed:28846366']	FEAQVRRTPQAVAVVIGEQALSYAQLNERANRLARHLISLGVQVDSRVAICVERSLEMVIGLLAINKAGAGYVPLDPAYPPERLAYMLEDSAPAVVLVHAATDELLGDVSAAVVDLDHNTWQSLSADNPQIPALTPQHTAYVIYTSGSTGQPKGVVNEHAGVVNRLLWMQDAYRLSAADSVLQKTPFSFDVSVWEFFWPLMTGARLVMAQPGGHKDPHYLSEVIEREHITTLHFVPSMLDVFLANSDTARCDSVRQVMCSGEALPGSLVRRFKLQLPGSALHNLYGPTEAAVDVTAWDCAGSIEQTPDNTPIGKPIANTRMYILNAQQQPVPQGVVGELYIAGVQVARGYLNRPELSAERFLDDPFQPSGRMYRTGDVARYRADGNIEYLGRNDDQVKIR	TTCGAAGCGCAGGTGCGGCGTACGCCACAGGCTGTGGCCGTCGTCATCGGCGAACAGGCATTGAGCTACGCGCAGTTGAACGAACGCGCCAACCGCTTGGCCCGGCACTTGATCAGCCTCGGTGTGCAAGTGGATTCACGGGTGGCGATCTGTGTCGAACGCAGCCTGGAGATGGTCATCGGCTTGCTGGCGATCAACAAGGCCGGCGCCGGTTATGTGCCGCTGGACCCGGCCTATCCGCCGGAGCGTCTCGCCTACATGCTTGAAGACAGCGCGCCGGCCGTGGTGCTGGTGCACGCGGCGACCGACGAATTGCTGGGAGATGTCTCGGCAGCGGTCGTCGACCTCGACCACAACACCTGGCAATCCCTGTCCGCCGACAATCCACAAATCCCGGCG…		['Structure-based inference', 'Mass spectrometry']	['pubmed:28846366']
6	BGC0001509	NRP	Pseudomonas fluorescens	anikasin	nrpspksdomains_A8O26_RS13965_AMP-binding.2	alanine	ala	ser	['pubmed:28846366']	FEAQVARTPQAPALLAGEQRLTYAELNAKANQLARHLRGVGVQADSRVAICVERGLDMVVGLLAILKAGGGYVPLDPAYPLERLGYMLDDSAPLAVLVQGSTRGLLGEVTLPVIDLDQPHWQSLPSDPLPTAELTPQHMAYVIYTSGSTGQPKGVINEHTAVVNRLLWMQDAYPLTAADTVLQKTPFSFDVSVWEFFWPLMTGARLVMAQPGGHKDPLYLSEIIEQERITTLHFVPSMLDVFLAHGDTQRCSQLRQVMCSGEALPGSLVRRFKRQLPGTALHNLYGPTEAAVDVTAWNCAGPLEQTPDNTPIGKPIANTRMYILDGQQQPVPQGVVGELYIGGVQVARGYLNRPELSAQRFLDDPFQANGRIYRTGDVARYLADGNIEYLGRNDDQVKIR	TTCGAGGCGCAAGTGGCGCGCACGCCACAGGCGCCGGCGTTGCTCGCCGGTGAACAGCGCTTGACCTATGCCGAGCTGAACGCCAAGGCCAACCAACTGGCGCGACACCTGCGTGGCGTGGGCGTGCAGGCGGATTCGCGGGTGGCGATTTGCGTCGAGCGCGGTCTGGACATGGTTGTCGGTCTGCTGGCGATCCTCAAGGCTGGCGGTGGTTATGTGCCGCTGGACCCGGCATATCCGCTGGAACGTCTTGGCTACATGCTGGACGACAGCGCGCCGCTGGCGGTGTTGGTGCAAGGTTCAACTCGCGGGCTGCTCGGTGAAGTCACCCTGCCTGTGATCGATCTCGATCAACCGCACTGGCAGTCGCTGCCGAGCGACCCTCTGCCGACCGCCGAG…		['Structure-based inference', 'Mass spectrometry']	['pubmed:28846366']
7	BGC0001509	NRP	Pseudomonas fluorescens	anikasin	nrpspksdomains_A8O26_RS13965_AMP-binding.4	leucine	leu	ile	['pubmed:28846366']	FQQQAAAHPKAVAAVHGAQSLSYFELNAQANRLAHHLIGQGVQPGDHVAILLPRSLELLVAQLAIAKCAAAYVPLDIHAPSERQAFMVEDCRAAALLTLSDEVIDYAATRIDLDRLKLSDQPTHNPNLAQSSESLAYIMYTSGSTGTPKGVMVPHRGIGRLVLNNGYADFNAQDRVVFASNPAFDASTMDIWGPLLNGGRVVIIDHQTLLDPQAFGRELSASGATILFVTTALFNQYVQLIPQALKGLRILLCGGERGDPEAFRTLLAEAPQLRIVHCYGPTETTTYATTFEVQAVAENAESVPIGGPISNTQVYVLDAHQQPLPMGVTGELYIGGQGVALGYLNRADLTAEKFLRDPFSDKPGALLYRTGDLARWLAPGQLDCVGRNDDQVKIR	TTCCAGCAACAAGCGGCGGCGCATCCAAAGGCTGTGGCGGCGGTGCATGGCGCACAATCGCTGAGTTATTTCGAACTGAACGCGCAGGCCAATCGCCTGGCTCATCACCTGATCGGCCAAGGCGTGCAACCAGGGGATCACGTGGCGATCCTGTTGCCACGCTCGCTGGAACTGCTGGTAGCGCAACTGGCGATTGCCAAGTGCGCGGCGGCCTATGTGCCACTGGACATCCATGCGCCGAGCGAACGTCAGGCGTTCATGGTCGAGGACTGTCGGGCGGCCGCGCTGCTGACCCTGAGCGACGAAGTCATCGATTACGCCGCAACGCGTATCGATCTGGACAGGCTGAAACTCAGTGATCAACCCACGCATAACCCTAACCTTGCGCAGTCTTCCGAG…		['Structure-based inference', 'Mass spectrometry']	['pubmed:28846366']
8	BGC0002092	NRP	Pseudomonas sp.	stechlisin B2	nrpspksdomains_steC_AMP-binding.4	leucine	leu	ile	['doi:10.1021/acs.jnatprod.0c00263']	FQQQAAAHPKAVAAVHGAHSLSYFELNAQANRLAHHLIAHGVQPGDHVAILLPRSLELLVAQLAVAKCAAAYVPLDINAPGERQAFMVEDCRAVALLTLSSEVIDYVAPRIDLDTLTLNGQPTHNPNLVQSSEALAYIMYTSGSTGTPKGVMVPHRGIGRLVLNNGYADFNAQDRVVFASNPAFDASTMDIWGPLLNGGRVVIIDHQTLLDPNAFGRELNASGATILFVTTALFNQYVQLIPQSLKGLRILLCGGERGDPAAFRRLLAEAPALRIVHCYGPTETTTYATTFEVREVAENAESVPIGGPIGNTQVYVLDAYQQPVPMGVTGELYIGGQGVALGYLNRPDLTAEKFLCDPFSEMPGALLYRTGDLARWLAPGQLDCIGRNDDQVKIR	TTCCAACAGCAGGCTGCGGCGCATCCCAAAGCTGTGGCAGCGGTGCATGGCGCACATTCACTGAGCTACTTTGAGCTGAACGCCCAAGCCAACCGCCTGGCCCATCACCTGATCGCTCACGGCGTGCAGCCGGGCGACCACGTGGCGATCCTGCTGCCGCGTTCGCTGGAGTTGCTGGTGGCGCAACTGGCTGTTGCCAAATGCGCGGCGGCCTATGTGCCGCTGGACATCAATGCACCTGGCGAGCGCCAGGCGTTCATGGTCGAGGATTGCCGGGCGGTGGCGCTGCTGACCCTCAGCAGCGAAGTCATCGACTACGTCGCACCGCGCATCGATCTGGACACGCTGACCCTCAACGGCCAGCCGACGCATAACCCGAACCTTGTGCAGTCTTCCGAG…	CCCCC[C@H](O)CC(=O)N[C@H](CC(C)C)C(=O)N[C@H](CC(=O)O)C(=O)N[C@H]1C(=O)N[C@H](CC(C)C)C(=O)N[C@H](CC(C)C)C(=O)N[C@H](CO)C(=O)N[C@@H](CC(C)C)C(=O)N[C@H](CCC(N)=O)C(=O)N[C@@H](CC(C)C)C(=O)N[C@@H]([C@@H](C)CC)C(=O)N[C@@H](CCC(=O)O)C(=O)O[C@@H]1C	['Structure-based inference']	['doi:10.1021/acs.jnatprod.0c00263', 'doi:10.1046/j.1365-2672.2000.01201.x']
9	BGC0001509	NRP	Pseudomonas fluorescens	anikasin	nrpspksdomains_A8O26_RS13970_AMP-binding.1	serine	ser	thr	['pubmed:28846366']	FEAHAQARPDATALIFEGQTLSYGELNRRANQVAHHLLALNIRPDDRVAICVERGPQMIIGLLGVLKAGAGYVPIDPAYPLDRISFTLQDSAPAAVLMQAATRDRVADLEVPQIDLDSAHLKAELDSNPQIPELTSAHLAYVIYTSGSTGLPKGVMVEHRNVARLFSATHDWFQFNQQDIWALFHSFAFDFSVWEIWGALAFGGQLLLVPQAVSRSPDDCYALLCQTGVTVLNQTPSAFRQLIAAQGRSPLQHSLREVIFGGEALEPGLLKPWYARVGNAGTRLVNMYGITETTVHVTYRPLQAADASLVGVSPIGVRIPDLQLYVLDAQREPVPVGVIGELYVGGAGVARGYLNREALTAERFINDPFGDNAEARLYKTGDLARWAVDGSLEYLGRND…	TTCGAAGCCCATGCGCAGGCCCGACCGGATGCCACGGCGTTGATTTTCGAAGGGCAGACGCTCAGCTACGGCGAGCTCAATCGTCGTGCCAACCAGGTCGCCCATCACTTGCTGGCATTGAACATCCGCCCGGATGACCGCGTGGCGATCTGCGTCGAACGTGGCCCGCAAATGATCATCGGCCTGCTCGGCGTACTCAAGGCCGGCGCCGGTTACGTGCCGATCGACCCGGCTTATCCGCTGGACAGAATCAGCTTTACCTTGCAGGACAGCGCCCCGGCAGCCGTGCTCATGCAAGCCGCGACGCGCGATCGCGTGGCTGATCTCGAGGTGCCGCAGATCGATCTCGACAGCGCCCACCTCAAGGCCGAACTCGACAGCAATCCGCAGATCCCCGAA…		['Structure-based inference', 'Mass spectrometry']	['pubmed:28846366']
10	BGC0000443	NRP	Pseudomonas sp. SHC52	thanamycin	nrpspksdomains_AED90003.1_AMP-binding.2	aspartic acid / 3-hydroxyaspartic acid	asp	dhb	['pubmed:22586093','pubmed:26412281']	FEQRAAAQPQAIALVFGDTALSYQALNRRANRIAQTLLAQGVRPDDRVAILAQRGVEMVCAVLAVLKAGAAYVPLDPAYPAERLGYLLDDSNPVVLLAQPTCLAALPEHAVPVVRLDDDLTADELAELDRNPDRLGLTSRHLAYVIYTSGSTGLPKGVLVEHGNVARLFDATAELFDFGRNDVWTLFHSFAFDFSVWEIWGALSYGGKLVVVPSEVARSPDDFYALVCQQQVTVLNQTPSAFRQFIEARERSDLEHGLREVIFGGEALDFRSLRPWTARTALSRTRLVNMYGITEITVHATYYPVSQDEIDAGAPSLIGPPLPDLCLRILDDYGQPVPVGVNGEIYIGGAGVARHYLNRDKLSAERFIPDPFATHADARLYRTGDIARYRADGGVIYVG…	TTCGAACAACGCGCCGCCGCCCAGCCCCAGGCCATTGCCCTGGTCTTTGGCGACACGGCGTTGAGTTACCAGGCCCTCAATCGCCGGGCCAACCGCATCGCCCAGACGCTGCTGGCCCAGGGCGTGCGCCCTGACGACCGGGTGGCGATCCTGGCCCAGCGCGGCGTGGAAATGGTCTGCGCGGTACTGGCGGTGCTCAAGGCCGGTGCGGCCTATGTGCCGCTGGACCCGGCCTATCCCGCCGAGCGACTCGGCTACCTGCTGGACGACAGCAACCCCGTGGTGCTGCTGGCGCAACCGACGTGCCTCGCCGCCCTGCCCGAGCACGCCGTGCCGGTGGTGCGTCTCGACGATGACCTCACGGCAGATGAGCTGGCGGAACTGGACCGCAATCCGGAC…	CCCCCCCCCCCCC(C(CC(=O)NC1COC(=O)C(NC(=O)C(NC(=O)/C(=C\C)/NC(=O)C(CC(=O)C(NC(=O)C(NC(=O)C(NC(=O)C(NC1=O)(CCCN)O)CC(=O)O)CCO)CC2=C3C=CNC3=CC=C2)C(C)O)C(C(=O)O)O)C(CCl)O)O)O	['Structure-based inference']	['pubmed:21551032', 'pubmed:22586093', 'pubmed:22121884']
11	BGC0000421	NRP	Pseudomonas fluorescens	safracin A	nrpspksdomains_sfcA_AMP-binding.1	glycine	gly	ala	['pubmed:22409961']	FLRQVAITPDKPALRTPQASISYSELASRVARLSAALRVRGFKPEQTLAILLPRDINLVPALLAIMACGGSYVPLSDANPAELNRSILTRARCRAILTDQEGLTRFAHLAPCWSLSDLLSMPDAPLQDQSKLQAKAYILFTSGSTGEPKGVAITHANAANLLRWAALDCGPEYLAQTLAATPTTFDLSIFEMFAPLMVGGCVQPVSSVMALIDNPALLKGTTLINTVPSVADALLQHDVLVPSLRMLNLAGEPLNRDLYLRLQAKLTATRIVNLYGPTETTTYSTALVIEPAQQEITIGFPLYGTWVDVVDQNMQSVGIGVPGELIIHGHGVAQGYVSDPVRSAASFLPASDGLRCYRTGDRVRWLPDGRLDFIGREDDQVKVR	TTTCTCCGGCAAGTCGCCATCACGCCGGACAAGCCCGCGCTGCGTACGCCGCAGGCCAGCATCAGCTATAGCGAATTGGCCAGTCGAGTCGCCAGGCTCTCGGCAGCCTTGCGCGTACGCGGCTTCAAACCTGAACAGACCCTGGCAATACTCCTGCCTCGCGATATCAATCTGGTACCCGCTCTGCTGGCGATCATGGCCTGCGGTGGCAGTTATGTGCCACTCAGTGACGCGAACCCCGCCGAACTCAACCGTTCGATTCTGACCAGGGCCCGTTGCCGCGCGATTCTCACGGATCAGGAGGGTTTGACCCGTTTCGCTCACTTGGCGCCCTGCTGGTCCTTGAGCGACCTGCTGTCGATGCCCGACGCCCCGCTGCAGGACCAGTCCAAGCTTCAA…	CC1=C(C(=C2[C@H]3[C@@H]4CC5=C([C@@H](N4C[C@H](N3C)CC2=C1)CNC(=O)[C@H](C)N)C(=O)C(=C(C5=O)C)OC)O)OC	['Structure-based inference', 'Homology']	['pubmed:15773985']
12	BGC0000443	NRP	Pseudomonas sp. SHC52	thanamycin	nrpspksdomains_AED90003.1_AMP-binding.3	4-chlorothreonine / threonine	thr	asp	['pubmed:22586093','pubmed:26412281']	FEAQVQANPDAVALVCEERQLSYRQLNRRANHLARQLLELGVQPDQRVAICTERSLEMIVGLLGVLKAGAAYVPIDPAHPAERMAFMLQDSQPQALLTQSALSLPSGELPVVLLDIVESLQAADDAAFDSNPQIPGLTADHLAYVIYTSGSTGQSKGVMVEHRSVFNFWHVLTRTTHQHCPTPATVALNAGFFFDMSIKGIAQLFSGHRLVIIPQLIRASGSELLDFLEQHQVHAFDSTPSQLDTLLAAGLLERQSYQPVSVLLGGEAINAATWEKLRNCQSIRFYNMYGPTECTVDATIDLIRDLGERPSIGRPFANVQVHVLDARGEPAPLGVAGEIHIGGVGVARGYLNRPELSAERFIADPFSSEPNARLYKTGDLGRWLADGTLEYLGRNDFQV…	TTCGAAGCCCAGGTGCAGGCCAACCCCGACGCCGTGGCTTTGGTCTGCGAAGAGCGCCAACTGAGCTATCGCCAGCTCAACCGCCGCGCCAACCACTTGGCCCGGCAGCTGCTTGAACTGGGCGTGCAGCCCGATCAGCGCGTGGCCATCTGCACCGAGCGCAGCCTGGAGATGATCGTCGGCCTGCTGGGCGTGCTCAAGGCCGGCGCGGCCTACGTGCCCATCGACCCGGCCCACCCGGCCGAGCGCATGGCCTTCATGCTGCAGGACAGCCAACCCCAAGCACTGTTGACCCAATCAGCACTGTCCCTGCCGTCCGGGGAACTGCCGGTGGTGCTGCTGGACATCGTGGAATCGTTGCAAGCGGCGGACGATGCGGCGTTCGACAGCAACCCACAG…	CCCCCCCCCCCCC(C(CC(=O)NC1COC(=O)C(NC(=O)C(NC(=O)/C(=C\C)/NC(=O)C(CC(=O)C(NC(=O)C(NC(=O)C(NC(=O)C(NC1=O)(CCCN)O)CC(=O)O)CCO)CC2=C3C=CNC3=CC=C2)C(C)O)C(C(=O)O)O)C(CCl)O)O)O	['Structure-based inference']	['pubmed:21551032', 'pubmed:22586093', 'pubmed:22121884']
13	BGC0000443	NRP	Pseudomonas sp. SHC52	thanamycin	nrpspksdomains_AED90002.1_AMP-binding.2	ornithine	orn	arg	['pubmed:22586093','pubmed:26412281']	FEQHVQKRPQAIAVQAEGVNLSYAELNTRANRIAHRLIAAGLRPDERVALLVERSPEMIIGILAILKAGGAYVPLDPNYPQDRLQHMLDDSTPRVLLTQSYLIETMAEQLPALHMPQLLLDDSTDGDDRNPRVEGLTSRHLAYVMYTSGSTGKPKGVMLEHRSVCNQIGALQERYGLNPQDRILQFATMTFDMSVEEIFGALLSGATLVLRSDAWIAGTAAFAALCEQHAISVANLPTVFWQQVARDAHVALPVCLRQFMIGGEAVGKQAVSQWFARAGHRPALFNAYGPTEATVNASIRRMESEHDDFRSIGKPLRSTQLHVLDALGNLVPLGVAGEIHIGGVGVARGYLNRHELTAERFIADPFSTDPDARLYKTGDLGRWCADGTLQYLGRNDDQV…	TTCGAACAGCACGTACAGAAGCGTCCCCAAGCCATCGCCGTCCAGGCCGAAGGGGTCAACCTCAGCTATGCCGAACTCAACACCCGGGCCAATCGCATTGCCCATCGCCTGATCGCCGCGGGCCTGCGTCCGGATGAACGAGTCGCCCTGTTGGTGGAACGCAGCCCGGAAATGATCATCGGCATCCTGGCCATTCTCAAGGCCGGCGGCGCCTACGTGCCGCTGGACCCGAACTACCCGCAGGACCGCTTGCAGCACATGCTCGACGACAGCACGCCGCGGGTCCTGCTCACCCAGAGCTACCTGATCGAAACCATGGCCGAACAACTGCCGGCGCTGCACATGCCGCAGCTGTTGCTCGACGACTCGACTGATGGCGATGATCGCAATCCAAGGGTC…	CCCCCCCCCCCCC(C(CC(=O)NC1COC(=O)C(NC(=O)C(NC(=O)/C(=C\C)/NC(=O)C(CC(=O)C(NC(=O)C(NC(=O)C(NC(=O)C(NC1=O)(CCCN)O)CC(=O)O)CCO)CC2=C3C=CNC3=CC=C2)C(C)O)C(C(=O)O)O)C(CCl)O)O)O	['Sequence-based prediction']	['pubmed:21551032', 'pubmed:22586093', 'pubmed:22121884']
