# Supplementary material for: Feature sequence-based genome mining uncovers the hidden diversity of bacterial siderophore pathways
Source: eLife. 2024 Oct 1;13:RP96719. doi: 10.7554/eLife.96719 (PMC11444679; doi:10.7554/eLife.96719)
Supplement: Supplementary file 6. [file elife-96719-supp6.xlsx]

## Sheet: Sheet1
Method		Description	Accuracy	Refrence
PHYfocus		phylogeny focus	0.94375
NP.searcher		specificity code	0.63125	https://www.ncbi.nlm.nih.gov/pmc/articles/PMC2712472/
PRISM4		phmm	0.7875	https://www.nature.com/articles/s41467-020-19986-1
AdenPredictor(default training set)		Mix	0.3875	https://www.ncbi.nlm.nih.gov/pmc/articles/PMC10311338/
SeMPI2		randomforest	0.58125	https://www.ncbi.nlm.nih.gov/pmc/articles/PMC7823522/
SANDPUMA		Mix	0.45625	https://academic.oup.com/bioinformatics/article/33/20/3202/3870463
antiSMASH5		Mix	0.5875	https://academic.oup.com/nar/article/47/W1/W81/5481154
As the fluorophore part is conserved, we only show the compare on the peptide (start from 5th amino acid)
A notebook to reprodut PHYfocus result could be found at https://drive.google.com/drive/folders/1JsfyPUGDTFo8BDDZk8JLSvKry8emzMhr?usp=drive_link
/: Missing module
X:Unknow substrate
spname	Mismatch	method	5	6	7	8	9	10	11	12	13	14	15
3A06		experiment	Asp	ε-Lys	OHAsp	Ser	Thr	Ser	Lys	cOHOrn
3A06	0	PHYfocus	-Asp	-Lys	+OHAsp	+Ser	-Thr	+Ser	+Lys	-OHOrn
3A06	4	antiSMASH5	Asp	X	X	Ser	Thr	Ser	X	Lys
3A06	1	PRISM4	Asp	Lys	Asp	Ser	Thr	Ser	Lys	OHOrn
3A06	4	AdenPredictor	Asp	Phe	Asp	Ser	Thr	Ser	Phe	Glu
3A06	4	SeMPI2	Asp	Phe	Asp	Ser	Thr	Ser	Phe	Phe
3A06	2	NP.searcher	Asp	Lys	Asp	Ser	Thr	Ser	Lys	/
3A06	4	SANDPUMA	Asp	X	Asp	Ser	Thr	Ser	X	X
3B19		experiment	Asp	FoOHOrn	Lys	Thr	Ala	Ala	Lys	FoOHOrn	Lys
3B19	0	PHYfocus	-Asp	+OHOrn	-Lys	-Thr	-Ala	+Ala	+Lys	+OHOrn	-Lys
3B19	5	antiSMASH5	Asp	X	X	Thr	Ala	Ala	X	X	X
3B19	3	PRISM4	Asp	OHOrn	Orn	Thr	Ala	Ala	Orn	OHOrn	Orn
3B19	8	AdenPredictor	Phe	Glu	Phe	Thr	Ser	Ser	Phe	Glu	Tyr
3B19	5	SeMPI2	Asp	Arg	Ser	Thr	Ala	Ala	Ser	Arg	Ser
3B19	2	NP.searcher	Asp	Lys	Lys	Thr	Ala	Ala	Lys	Lys	Lys
3B19	7	SANDPUMA	Asp	hOrn	hOrn	Thr	X	X	X	hOrn	hOrn
3G07		experiment	Asp	FoOHOrn	Lys	Thr	Ala	Ala	FoOHOrn	Lys
3G07	0	PHYfocus	-Asp	+OHOrn	-Lys	-Thr	-Ala	+Ala	+OHOrn	-Lys
3G07	4	antiSMASH5	Asp	X	X	Thr	Ala	Ala	X	X
3G07	2	PRISM4	Asp	OHOrn	Orn	Thr	Ala	Ala	OHOrn	Orn
3G07	7	AdenPredictor	Phe	Glu	Phe	Thr	Ser	Ser	Glu	Phe
3G07	4	SeMPI2	Asp	Arg	Ser	Thr	Ala	Ala	Arg	Ser
3G07	2	NP.searcher	Asp	Lys	Lys	Thr	Ala	Ala	Lys	Lys
3G07	6	SANDPUMA	Asp	hOrn	hOrn	Thr	X	X	hOrn	X
s3b09		experiment	Asp	ε-Lys	OHAsp	Ser	aThr*	Ala	Thr	Lys	cOHOrn
s3b09	0	PHYfocus	-Asp	-Lys	+OHAsp	-Ser	-Thr	+Ala	+Thr	+Lys	-OHOrn
s3b09	4	antiSMASH5	Asp	X	X	Ser	Thr	Ala	Thr	X	Lys
s3b09	1	PRISM4	Asp	Lys	Asp	Ser	Thr	Ala	Thr	Lys	OHOrn
s3b09	5	AdenPredictor	Asp	Phe	Asp	Ser	Thr	Phe	Thr	Phe	Glu
s3b09	4	SeMPI2	Asp	Phe	Asp	Ser	Thr	Ala	Thr	Phe	Phe
s3b09	2	NP.searcher	Asp	Lys	Asp	Ser	Thr	Ala	Thr	Lys	/
s3b09	5	SANDPUMA	Asp	X	Asp	Ser	Thr	X	Thr	X	X
s3c13		experiment	Ser	Val	OHAsp	Gly	Thr	Ser	cOHOrn
s3c13	1	PHYfocus	+Ser	-Unknow	-OHAsp	-Gly	-Thr	+Ser	-OHOrn
s3c13	3	antiSMASH5	Ser	X	Asp	Gly	Thr	Ser	Lys
s3c13	2	PRISM4	Ser	Arg	Asp	Gly	Thr	Ser	OHOrn
s3c13	3	AdenPredictor	Ser	Phe	Asp	Gly	Thr	Ser	Glu
s3c13	3	SeMPI2	Ser	Phe	Asp	Gly	Thr	Ser	Phe
s3c13	4	NP.searcher	/	/	/	Gly	Thr	Ser	Cys
s3c13	3	SANDPUMA	Ser	X	Asp	Gly	Thr	Ser	X
s3e20		experiment	Ser	Lys	Ala	Ser	Ser	AcOHOrn	Ser	Ser	cOHOrn
s3e20	0	PHYfocus	+Ser	-Lys	+Ala	-Ser	+Ser	+OHOrn	+Ser	-Ser	-OHOrn
s3e20	3	antiSMASH5	Ser	X	Ala	Ser	Ser	X	Ser	Ser	X
s3e20	0	PRISM4	Ser	Lys	Ala	Ser	Ser	OHOrn	Ser	Ser	OHOrn
s3e20	4	AdenPredictor	Ser	Phe	Ser	Ser	Ser	Glu	Ser	Ser	Glu
s3e20	3	SeMPI2	Ser	Leu	Ala	Ser	Ser	Arg	Ser	Ser	Phe
s3e20	2	NP.searcher	Ser	Lys	Ala	Ser	Ser	Lys	Ser	Ser	Cys
s3e20	4	SANDPUMA	Ser	X	X	Ser	Ser	hOrn	Ser	Ser	hOrn
s3a19		experiment	e-Lys	OHAsp	Ala	aThr*	Ala	cOHOrn
s3a19	0	PHYfocus	-Lys	+OHAsp	-Ala	+Thr	-Ala	+OHOrn
s3a19	3	antiSMASH5	X	Asn	Ala	Thr	Ala	X
s3a19	1	PRISM4	Lys	Asp	Ala	Thr	Ala	OHOrn
s3a19	5	AdenPredictor	Phe	Asp	Phe	Thr	Ser	Glu
s3a19	3	SeMPI2	Phe	Asp	Ala	Thr	Ala	Phe
s3a19	5	NP.searcher	Lys	pk	Asp	Ala	Thr	Ala
s3a19	5	SANDPUMA	X	Asp	X	Thr	X	X
s3e01		experiment	Lys	AcOHOrn	Gly	aThr*	Thr	Gln	Gly	Ser	cOHOrn
s3e01	1	PHYfocus	+Orn	+OHOrn	-Gly	-Thr	+Thr	-Gln	-Gly	+Ser	+OHOrn
s3e01	3	antiSMASH5	X	X	Gly	Thr	Thr	Gln	Gly	Ser	X
s3e01	2	PRISM4	Orn	OHOrn	Gly	Thr	Thr	Ser	Gly	Ser	OHOrn
s3e01	4	AdenPredictor	Phe	Glu	Phe	Thr	Thr	Gln	Gly	Ser	Glu
s3e01	3	SeMPI2	Phe	Arg	Gly	Thr	Thr	Gln	Gly	Ser	Phe
s3e01	2	NP.searcher	Lys	Lys	Gly	Thr	Thr	Gln	Gly	Ser	Lys
s3e01	3	SANDPUMA	hOrn	hOrn	aoh-Gly	Thr	Thr	Gln	aoh-Gly	Ser	X
s3e15		experiment	Ser	AcOHOrn	Ala	Gly	Thr	Gly	OHAsp	Lys
s3e15	2	PHYfocus	+Ser	+OHOrn	-Ala	-Gly	+Thr	-Ala	-OHAsp	-Orn
s3e15	4	antiSMASH5	Ser	X	Ala	Gly	Thr	Ala	Asp	X
s3e15	3	PRISM4	Ser	OHOrn	Ala	Gly	Thr	Ala	Asp	Orn
s3e15	6	AdenPredictor	Ser	Glu	Ser	Phe	Thr	Ser	Phe	Phe
s3e15	7	SeMPI2	/	Asp	Ala	Thr	Gly	Ala	Phe	Phe
s3e15	4	NP.searcher	Ser	Lys	Ala	Gly	Thr	Ala	Asp	/
s3e15	5	SANDPUMA	Ser	hOrn	X	aoh-Gly	Thr	X	Asp	Arg
3D03		experiment	Ser	Lys	Ser	Thr	Ala	AcOHOrn	cOHOrn
3D03	0	PHYfocus	+Ser	-Lys	+Ser	-Thr	+Ala	+OHOrn	+OHOrn
3D03	3	antiSMASH5	Ser	X	Ser	Thr	Ala	X	X
3D03	0	PRISM4	Ser	Lys	Ser	Thr	Ala	OHOrn	OHOrn
3D03	4	AdenPredictor	Ser	Phe	Ser	Thr	Ser	Glu	Glu
3D03	3	SeMPI2	Ser	Phe	Ser	Thr	Ala	Phe	Phe
3D03	2	NP.searcher	Ser	Lys	Ser	Thr	Ala	Lys	/
3D03	4	SANDPUMA	Ser	X	Ser	Thr	X	hOrn	X
3A13		experiment	Lys	AcOHOrn	Ala	Gly	aThr*	Ser	cOHOrn
3A13	1	PHYfocus	+Orn	+OHOrn	-Ala	-Gly	+Thr	-Ser	-OHOrn
3A13	3	antiSMASH5	X	X	Ala	Gly	Thr	Ser	X
3A13	1	PRISM4	Orn	OHOrn	Ala	Gly	Thr	Ser	OHOrn
3A13	4	AdenPredictor	Phe	Glu	Ser	Gly	Thr	Ser	Glu
3A13	3	SeMPI2	Phe	Arg	Ala	Gly	Thr	Ser	Phe
3A13	2	NP.searcher	Lys	Cys	Ala	Gly	Thr	Ser	Lys
3A13	4	SANDPUMA	X	hOrn	X	aoh-Gly	Thr	Ser	hOrn
3B09		experiment	Ser	AcOhOrn	Ala	Gly	aThr*	Ala	cOHOrn
3B09	0	PHYfocus	+Ser	+OHOrn	-Ala	-Gly	+Thr	-Ala	-OHOrn
3B09	2	antiSMASH5	Ser	X	Ala	Gly	Thr	Ala	X
3B09	0	PRISM4	Ser	OHOrn	Ala	Gly	Thr	Ala	OHOrn
3B09	4	AdenPredictor	Ser	Glu	Ser	Gly	Thr	Ser	Glu
3B09	2	SeMPI2	Ser	Phe	Ala	Gly	Thr	Ala	Phe
3B09	3	NP.searcher	Ser	Lys	Ala	Gly	Thr	/	/
3B09	4	SANDPUMA	Ser	hOrn	X	aoh-Gly	Thr	X	hOrn
s3e11		experiment	e-Lys	OHAsp	Ala	aThr*	Ala	cOHOrn
s3e11	0	PHYfocus	-Lys	+OHAsp	-Ala	+Thr	+Ala	+OHOrn
s3e11	3	antiSMASH5	X	Asn	Ala	Thr	Ala	X
s3e11	1	PRISM4	Lys	Asp	Ala	Thr	Ala	OHOrn
s3e11	5	AdenPredictor	Phe	Asp	Phe	Thr	Ser	Glu
s3e11	3	SeMPI2	Phe	Asp	Ala	Thr	Ala	Phe
s3e11	2	NP.searcher	Lys	Asp	Ala	Thr	Ala	Lys
s3e11	5	SANDPUMA	X	Asp	X	Thr	X	X
s3a07		experiment	Ala	AcOHOrn	Gly	Gly	Ser	Ala	OHAsp	Thr
s3a07		PHYfocus	+Ala	+OHOrn	-Gly	-Gly	+Ser	-Ala	-OHAsp	-Thr
s3a07	2	antiSMASH5	Ala	X	Gly	Gly	Ser	Ala	X	Thr
s3a07	2	PRISM4	Ala	OHOrn	Gly	Gly	Ser	Ala	/	Phe
s3a07	6	AdenPredictor	Ser	Glu	Phe	Phe	Ser	Ser	Phe	Thr
s3a07	3	SeMPI2	Ala	Phe	Gly	Gly	Ser	Ala	Asp	/
s3a07	4	NP.searcher	Ala	Lys	Gly	Gly	Ser	/	/	/
s3a07	4	SANDPUMA	X	hOrn	aoh-Gly	aoh-Gly	Ser	X	b-ala	Thr
3C14		experiment	Ala	Lys	Gly	Gly	OHAsp	Gln	Dab	Gly	Ala	cOHOrn
3C14	0	PHYfocus	+Ala	+Lys	-Gly	-Gly	-OHAsp	+Gln	-Dab	-Gly	+Ala	-OHOrn
3C14	4	antiSMASH5	Ala	X	Gly	Gly	X	Gln	X	Gly	Ala	Lys
3C14	2	PRISM4	Ala	Lys	Gly	Gly	Asp	Ser	Dab	Gly	Ala	OHOrn
3C14	8	AdenPredictor	Ser	Phe	Gly	Phe	Phe	Tyr	Dab	Phe	Ser	Glu
3C14	3	SeMPI2	Ala	Phe	Gly	Gly	Asp	Gln	Dab	Gly	Ala	Phe
3C14	6	NP.searcher	Ala	Lys	Gly	Gly	Asp	/	/	/	/	/
3C14	4	SANDPUMA	Ala	X	aoh-Gly	aoh-Gly	Asp	Gln	X	aoh-Gly	Ala	X
3C06		experiment	e-Lys	OHAsp	Thr	Thr	Ser	OhAsp	Ser
3C06	0	PHYfocus	-Lys	+OHAsp	-Thr	-Thr	-Ser	+OHAsp	-Ser
3C06	3	antiSMASH5	X	Asp	Thr	Thr	Ser	Asn	Ser
3C06	2	PRISM4	Lys	Asp	Thr	Thr	Ser	Asp	Ser
3C06	3	AdenPredictor	Phe	Asp	Thr	Thr	Ser	Asp	Ser
3C06	3	SeMPI2	Phe	Asp	Thr	Thr	Ser	Asp	Ser
3C06	2	NP.searcher	Lys	Asp	Thr	Thr	Ser	Asp	Ser
3C06	3	SANDPUMA	X	Asp	Thr	Thr	Ser	Asp	Ser
s3d06		experiment	Ala	Val	OHHis	Asp	Cit	Ser	Ala	Ala	cOHOrn
s3d06	4	PHYfocus	+Ala	-Unknow	-Unknow	+Unknow	-Unknow	-Ser	+Ala	+Ala	-OHOrn
s3d06	5	antiSMASH5	Ala	X	X	Asn	X	Ser	Ala	Ala	Lys
s3d06	3	PRISM4	Ala	Arg	Phe	Asp	Arg	Ser	Ala	Ala	OHOrn
s3d06	7	AdenPredictor	Ser	Phe	Glu	Asp	Phe	Ser	Phe	Phe	Glu
s3d06	4	SeMPI2	Ala	Phe	Phe	Asp	Phe	Ser	Ala	Ala	Phe
s3d06	4	NP.searcher	Ala	Cys	pro	Asp	Thr	Ser	Ala	Ala	Cys
s3d06	7	SANDPUMA	X	X	X	Asp	X	Ser	X	X	X
3A18		experiment	e-Lys	OHAsp	Thr	Thr	Gly	OHAsp	Ser
3A18	0	PHYfocus	-Lys	+OHAsp	-Thr	-Thr	-Gly	+OHAsp	-Ser
3A18	3	antiSMASH5	X	Asn	Thr	Thr	Gly	Asn	Ser
3A18	2	PRISM4	Lys	Asp	Thr	Thr	Gly	Asp	Ser
3A18	3	AdenPredictor	Phe	Asp	Thr	Thr	Gly	Asp	Ser
3A18	3	SeMPI2	Phe	Asp	Thr	Thr	Gly	Asp	Ser
3A18	2	NP.searcher	Lys	Asp	Thr	Thr	Gly	Asp	Ser
3A18	3	SANDPUMA	X	Asp	Thr	Thr	Gly	Asp	Ser
3E13		experiment	Ser	Ser	Gln	Dab	OHAsp	Thr	Gly	OHAsp	Gln	Gln	Gly
3E13	0	PHYfocus	+Ser	+Ser	-Gln	-Dab	+OHAsp	-Thr	-Gly	+OHAsp	+Gln	-Gln	-Gly
3E13	3	antiSMASH5	Ser	Ser	Gln	X	Asn	Thr	Gly	Asn	Gln	Gln	Gly
3E13	5	PRISM4	Ser	Ser	Ser	Dab	Asp	Thr	Gly	Asp	Ser	Ser	Gly
3E13	2	AdenPredictor	Ser	Ser	Gln	Dab	Asp	Thr	Gly	Asp	Gln	Gln	Gly
3E13	2	SeMPI2	Ser	Ser	Gln	Dab	Asp	Thr	Gly	Asp	Gln	Gln	Gly
3E13	4	NP.searcher	Ser	Ser	Gln	nrp	Asp	Thr	Gly	Asp	Gln	Gln	/
3E13	3	SANDPUMA	Ser	Ser	Gln	X	Asp	Thr	Gly	Asp	Gln	Gln	Gly
s3b02		experiment	Ala	AcOHOrn	Gly	Gly	Ser	Ala	OHAsp	Thr
s3b02	0	PHYfocus	+Ala	+OHOrn	-Gly	-Gly	+Ser	-Ala	-OHAsp	-Thr
s3b02	2	antiSMASH5	Ala	X	Gly	Gly	Ser	Ala	X	Thr
s3b02	1	PRISM4	Ala	OHOrn	Gly	Gly	Ser	Ala	Phe	Thr
s3b02	6	AdenPredictor	Ser	Glu	Phe	Phe	Ser	Ser	Phe	Thr
s3b02	2	SeMPI2	Ala	Phe	Gly	Gly	Ser	Ala	Asp	Thr
s3b02	3	NP.searcher	Ala	Lys	Gly	Gly	Ser	Ala	/	/
s3b02	4	SANDPUMA	X	hOrn	aoh-Gly	aoh-Gly	Ser	X	b-Ala	Thr
