# Supplementary material for: Feature sequence-based genome mining uncovers the hidden diversity of bacterial siderophore pathways
Source: eLife. 2024 Oct 1;13:RP96719. doi: 10.7554/eLife.96719 (PMC11444679; doi:10.7554/eLife.96719)
Supplement: Supplementary file 7. [file elife-96719-supp7.xlsx]

## Sheet: Sheet1
source	spname	product	publications	domain_id	substrate	aaseq	superkingdom	genus
collaborator	Mycetohabitansrhizoxinica	rhizomide	DOI: 10.1073/pnas.1720941115	Leu-rhizomide-Mycetohabitansrhizoxinica-A1	leu	SYTQLNAQANRLAHQLIELGVKPDVRVAICVERSPALVVGLLAILKAGGAYVPLDPSYPGERLAHILGNAEPNMVLADAAGRTALGEAALAECTVLDPATLPALPDTNPSVAELTARHLAYVIYTSGSTGTPKGVMVEHRNVANLCAWHNRKFGVQSGCRSAFMAGMAFDASAWELWPSLIGGGMLSIPSQAVCEQVLALLQWWQQQLLDVAFLVTPLAEMALADQRTPAGLRYLLTGGERFPGVTRALPAGLTLVNQYGPTEATVVATSGQLSAEDTLPHIGRPIDNTRIYILDAYRQPVPLGAVGELYIGGTGVARGYLNRPELTAERFVPDPFSEDADARLYKTGDLARYLPDGNLEFVGRNDDQVKIRGFRIEPGEIEACLMAHSQVRDAVVL	Bacteria	Mycetohabitans
collaborator	Mycetohabitansrhizoxinica	rhizomide	DOI: 10.1073/pnas.1720941115	Thr-rhizomide-Mycetohabitansrhizoxinica-A2	thr	SYAQLNAQANRLAHQLIELGGVKPDIRVAICVERSPALVVGVLAILKAGGAYVPLDPAYPSERLAYILADAAPNIVLADAAGRAALGDAVIAECTVLDPATLPALPDTNPSVAELTARHLAYVIYTSGSSGTPKGVMVEHAQVVRLFEATQPWYGFNEHDTWCLFHSFAFDFSVWELWGALRYGGKLVIVPHPIARSADAFYPLICEQGVTVLNQTPSAFKALMASQAHSALSDQLRYVILGGEALEPTLLQAWYATHDERHPQLFNMYGITEATVHVTYRPLRQQDSEQAGSPVGTRIPDLTIYLLDAHGQPVPLGAVGELYIGGAGVARGYLNRPELTAERFVHDPFSEDADARLYKTGDLARYLPDGNLEFVGRNDEQVKIRGFRIEPGEIEACLT…	Bacteria	Mycetohabitans
collaborator	Mycetohabitansrhizoxinica	rhizomide	DOI: 10.1073/pnas.1720941115	Tyr-rhizomide-Mycetohabitansrhizoxinica-A3	tyr	SYAQLNAQANRLAHQLIELGVKPDARVAICVQRSPVLVVGLLAILKAGGAYVPLDPSYPGERLAYILADAAPNIVLADTAGRAALGEAALAERTVLDPATLSALPDTNPSVAGLTARHLAYVIYTSGSTGMPKGVMVEHRGVVNLALAQIACFGVQPASRMLQFASFSFDASASEIWMAFGSGAALYLPPEAARQDRHALWDYLASHAITHATLPPALLQHGADLPSFGLSLTLILAGEAPSATLVRDLADQGTVFNAYGPTETTVCATAWRGARDFSGEVPIGRPIANTRIYLLDAYGQPVPLGAVGELYIGGAGVARGYLNRPELTAERFVRDPFVDEPDARMYKTGDLARYLPDGNLEFLGRNDEQVKIRGFRIEPEEIEACLTAHPQVRDAVVV	Bacteria	Mycetohabitans
collaborator	Mycetohabitansrhizoxinica	rhizomide	DOI: 10.1073/pnas.1720941115	Ala-rhizomide-Mycetohabitansrhizoxinica-A4	ala	SYAQLNAQANRLAHQLIELGVKPDTCVAICVQRSAALVVGLLAILKAGGAYVPLDPSYPGERLAHILADAAPNIVLADAAGCAALGEMALAECTVLDPTTLPALPDTNPSIAELTARHLAYVIYTSGSTGTPKGVMVEHAQAVNFLCWAVQTFTPLETQHTLFATSISFDLSVYECFVPLAQGSTVHLVKDALALMHQTQPVSLINTVPSALQSLLAHRANLSSATTINLAGEPLTARFIQQIFEQTPIQRLCNLYGPSESTTYSTWLSIQRGEALIESIGRPIANTRVYLLDAHGQPVPLGAVGELYIGGAGVARGYLNRPKLTAERFVRDPFVGEPDARMYKTGDLARYLPDGNLEFLGRNDEQVKIRGFRIEPGEIEACLTAHPQVRDAVVL	Bacteria	Mycetohabitans
collaborator	Mycetohabitansrhizoxinica	rhizomide	DOI: 10.1073/pnas.1720941115	Ala-rhizomide-Mycetohabitansrhizoxinica-A5	ala	SYAQLNAQANRLAHQLIELGVKPDTCVAICVQRSAVLVVGVLAVLKAGGAYVPLDPSYPGERLAHILADAAPNIVLADAAGRAALGEVALAECTVLDPTTLPALPDTNPSIAELTARHLAYVIYTSGSTGTPKGVMVEHAQAVNFLCWAVQTFTPLETQHTLFATSISFDLSVYECFVPLAQGSTVHLVKDALALMHHTQPVSLINTVPSALQSLLAHQADLSSVVTINVAGEPLRSSLIKQAFEKTPVQRLCNLYGPSESTIYSTWLSIQRGEPFVESIGRPIANTRIYLLNGYGQPVPLGAVGELYIGGAGVARGYLNRPELTAERFVHDPFVNETHARMYKTGDLARYLPDGNLEFLGRNDHQVKIRGFRIELGEIEARLTQHAQVRDAVVL	Bacteria	Mycetohabitans
collaborator	Mycetohabitansrhizoxinica	rhizomide	DOI: 10.1073/pnas.1720941115	Ala-rhizomide-Mycetohabitansrhizoxinica-A6	ala	SYAQLNAQANRLAHQLIELGVVPDARVAICVERSPAMVVGLLAILKAGGAYVPLDPAYPGARLAHILTDAAPDIVLADAAGRAALGEAALAHRTVLDPTTLPALPDTNPSIAELTARHLAYVIYTSGSTGTPKGVMVEHAQAVNFLCWAVQTFTPLETQHTLFATSISFDLSVYECFVPLAQGSTVHLVKDALALMHQTQPVSLINTVPSALQSLLTHGANLSSATTINLAGEPLTARFIQQIFEQTPIQRLCNLYGPSESTTYSTWLSIQRGEAWIESIGRPIANTRVYLLDAHGQPVPLGAVGELYIGGAGVARGYLNRPELTAERFVRDPFVGEPDARMYKTGDLARYLPDGNLEFLGRNDEQVKIRGFRIEPGEIEACLTAHPQVRDAVVV	Bacteria	Mycetohabitans
collaborator	Mycetohabitansrhizoxinica	rhizomide	DOI: 10.1073/pnas.1720941115	Val-rhizomide-Mycetohabitansrhizoxinica-A7	val	SYAQLNAQANRLAHQLIELGVKPDTCVAICVQRSAALVVGLLAILKAGGAYVPLDPSYPGERLAHILTDAAPSIVLADAAGRAALGEAALAECTVLDPATLPALPDTNPSVAGLTARHLAYVIYTSGSTGTPKGVMVPHHAIARLVINNDYVDICTGDRVAFAANPAFDASTFEVWAPLLNGATVVVIDHDTVLMPAAFAHTLREQHISILWLTVGLFNQMAAQVDTAFSQLKVLIVGGDVLDARLVARVMRESPPEQLINGYGPTESTTFATTYKITSVPETNASLPIGRPIANTRVYLLDAHGQPVPLGAVGELYIGGAGVARGYLNRPELTAERFVRDPFSDEADARLYKTGDLVRYLPDGNLEFLGRNDDQIKIRGFRIEPGEIEACLTAHPQVR…	Bacteria	Mycetohabitans
collaborator	Mycetohabitansrhizoxinica_1	Holrhizin	DOI: 10.1021/acs.jnatprod.9b00927	Val-Holrhizin-Mycetohabitansrhizoxinica-A1	val	SYAELNARANRLAHQLIELGVMPDARVAICVQRSPAMVVGLLAILKAGGAYVPLDPSYPGERLAHILADAAPNIVLADAAGRAALGGAALTDRTVLDPNWLPAQAETNPVVPDLASRHLAYVIYTSGSTGMPKGVMVEHRSIARLVINNGYLDVGAADRVALAANPAFDASTFEVWAPLLNGAAAVVISRDTVLNPAAFAQTLQEQRISILWLTVGLFNQLFIELGPVFPQLKALIVGGDALDANVVAQVLQGTPPQQLINGYGPTESTTFTTTYRIDAIREDTLSIPIGRPIANTQIYLLDAYKQPVPLGAVGELYIGGAGVARGYLNRPELTAERFVRDPFVDEADARMYKTGDLARYLPDGNLEFLGRNDHQVKIRGFRIELGEIEACLAQHAQVR…	Bacteria	Mycetohabitans
collaborator	Mycetohabitansrhizoxinica_1	Holrhizin	DOI: 10.1021/acs.jnatprod.9b00927	Phe-Holrhizin-Mycetohabitansrhizoxinica-A2	phe	SYAELNARANRLAHQLIELGVMPDARVAICVQRSPAMVVGLLAILKAGGAYVPLDPSYPGERLAHILADAAPNIVLADAAGRAALGGAALTDRTVLDPNWLPAQAETNPVVPDLTSRHLAYVIYTSGSTGTPKGVMVEHRGVVNLAQAQIACFDVHATSRIVQFASFSFDASVFEIFMALGCGASLHLPSDGVRYDRYRLWQYLTECGITHVTLPPALLQEGRDLPRLNQPLTAILAGEAPSVALFHNLMNQGVVVFNAYGPTETTVCVSAWRGLNLFNGKVLPIGRPLANTRVYLLDAHGQPVPLGAVGELYIGGAGVARGYLNRPELTAERFVRDPFASEPDARMYKTGDLARYLPDGNLEFLGRNDHQVKIRGFRIELGEIETCLVQHAQVHEAVVL	Bacteria	Mycetohabitans
collaborator	Mycetohabitansrhizoxinica_1	Holrhizin	DOI: 10.1021/acs.jnatprod.9b00927	Glu-Holrhizin-Mycetohabitansrhizoxinica-A3	glu	SYAELNDKANQLAHYLRALDVGPEVVVGLCAERSLEAIIGLLGILKAGGAYLPLDPSHPAERLASMLRQASVAVLVTQSHLEARLPEIQARRIDLDTDWAKIAACPKTRLDSGVTAEHLAYMIYTSGSTGQPKGVMHSHRGVVNYLSFLTRHYAITCADTILNITGLAFDPCVRDLFGPLTAGARVIILPNEQAKEPGRYLSAIRERSVTKLLSITPSFLRSLCETVPAGPIASSLNTILTSGEPLEASVCEQVHKAFGLQVTVVNQYGPSECTMASTWFKADAQQEGRVPIGRPVPNVRVYVLGRHLEPLPIGVTGELYIAGAGVARGYINQPELSAERFIPSPFGPGERLYRTGDLARWRLDGQLEYIGRLDQQIKIRGFRIEPGEIEAALVKHPSI…	Bacteria	Mycetohabitans
collaborator	Mycetohabitansrhizoxinica_1	Holrhizin	DOI: 10.1021/acs.jnatprod.9b00927	Ile-Holrhizin-Mycetohabitansrhizoxinica-A4	ile	SYAELNARANRLAHQLIELGVVPDARVAICVQRSPALVVGLLAILKAGGAYVPLDPTYPSERLAHILVDAAPSIVLADAAGRAALGEAALAECTVLDPATVPALPDTNPSVASLTSRHLAYVIYTSGSTGVPKGVMVHHQGVVRLVRNTDYIKVEPGAVFALASNLAFDATTFEIWTPLLNGARIEVIERETLLSPAMLSRKLKQSGVTVLFLTTALFNQMVKEKVEAFSDLHYLLFGGENADPRCVFRVLQQAKPRHLLHVYGPTETVTYASWYEVSNVKQDTSIPIGRPIANTRIYLLDRYGQPVPLGAVGELYIGGAGVARGYLNRPELTAERFVHDPFASEPDARMYKTGDLARYLPDGNLEFLGRNDHQVKIRGFRIELGEIETCLAQHTQVRD…	Bacteria	Mycetohabitans
collaborator	Mycetohabitansrhizoxinica_1	Holrhizin	DOI: 10.1021/acs.jnatprod.9b00927	Ala-Holrhizin-Mycetohabitansrhizoxinica-A5	ala	SYTELNARANRLAHQLIELGVVPNARVAICVQRSPAMVVGLLAILKAGGAYVPLDPSYPGERLAHILMDAAPDIVLADAAGQVALGDAALAHRTVLDPNRLPAQRETNPSVPALTSRHLAYVIYTSGSTGIPKGVMVEHAQTVNFLFWALQTFTSAETQHTLLATSISFDLSIYECFVPLAQGSTVHLVEDALALMHHAQPVSLINTVPSALQSLLAHQADLSSAVTINMAGEPLKASLIKQVFEKTPVQRLCNLYGPSESTTYSTWLSIQRGAPFIESIGRPIANTRIYLLDRYGQPVPLGAVGELYIGGAGVARGYLNRPELTAERFVHDPFASEPDARMYKTGDLARYLPDGNLEFLGRNDHQVKIRGFRIELGEIETCLAQHTQVRDAVVL	Bacteria	Mycetohabitans
collaborator	Mycetohabitansrhizoxinica_1	Holrhizin	DOI: 10.1021/acs.jnatprod.9b00927	Ile-Holrhizin-Mycetohabitansrhizoxinica-A6	ile	SYTELNARANRLAHQLIELGVVPNARVAICVQRSPAMVVGLLAILKAGGAYVPLDPSYPGERLAHILMDAVPDIVLADAAGRAALGGAALAECTVLDPNRLPAQAETNPVVPDLTSRHLAYVIYTSGSTGVPKGVMVHHQGVVRLVRNTDYIKVEPGAVFALASNLAFDATTFEIWTPLLNGARIEVIERETLLSPAMLSRKLKQSGVTVLFLTTALFNQMVKEKVEAFSDLHYLLFGGENADPRCVFRVLQQAKPRHLLHVYGPTETVTYASWYEVSNVKQDTSIPIGRPIANTRIYLLDRYGQPVPLGAVGELYIGGAGVARGYLNRPELTAERFVHDPFASEPDARMYKTGDLARYLPDGNLEFLGRNDHQVKIRGFRIELGEIEACLAQHTQVRD…	Bacteria	Mycetohabitans
collaborator	SchlegelellabrevitaleaDSM7029	Glidonin	DOI: 10.1038/s41467-023-42387-z	Asn-Glidonin-SchlegelellabrevitaleaDSM7029-A2	asn	FEAQAAQTPDAVAVRDDVCQLSYRELNARANQLARYLRAHGVGPDRRVAICTERSAGLIVALLGVLKAGGAYVPLDPGYPAERINDMLEDAEPTVILTEARLQAALAGKAAHVVALDAQWPEILLHREADLEQHEVGLLPRHLAYVIYTSGSTGRPKGVMIEHAAWLNYLQWAVRAYECHAGEGAVVSSSIAFDATITSLYTPLLCGRTVVLVRDGDELAGLEALLRQGKAWSLIKITPAHLDALGRRLQANPAPCAVRAFVIGGEALAPATVALWRGICPQARLINEYGPTETVVGCSVYELPADTSDLVTVPIGRPIANTQIYLLDERRQPVPIGVPGEIYIGGAGVARGYLNRPELTAERFVPDPFSEVPNAKLYKTGDLGRWRADGHLEYLGRND…	Bacteria	Caldimonas
collaborator	SchlegelellabrevitaleaDSM7029	Glidonin	DOI: 10.1038/s41467-023-42387-z	Pro-Glidonin-SchlegelellabrevitaleaDSM7029-A3	pro	FEAQARRCPDAAAVVYGGDRLSYADLNARANRLARELRAQGVGPDTPVAVCMERSLEMVVALLGILKAGGAYVPLDPAYPTERLEYMLADAAPTVVITQARLRGRVATAARVLALEAGGPPVEAQEAGDVEAASIGLAPHHLAYVIYTSGSTGTPKGVAMPHSALVNLLKWQRAALRSGKPQRTLQFAALGFDVAFQETFTTLATGGTLVMIPEAVRGDPVALVRLLHEQAVQRVFLPFVALHHLAEAMVASSQALPCLEDVITAGEQLRITPAIAALFKSQPGCRLHNHYGPTESHVVTALSLPEEVERWPELPTIGTPIANARLYILDERRQPVPIGVTGEIYIGGVAVARGYLNRPELTAERFVADPFSAEPQAQMYRTGDLGRWRADGQIDYLGR…	Bacteria	Caldimonas
collaborator	SchlegelellabrevitaleaDSM7029	Glidonin	DOI: 10.1038/s41467-023-42387-z	Val-Glidonin-SchlegelellabrevitaleaDSM7029-A4	val	FEAQARQRPEAVALVCGVRTLSYADVNERANRLAHHLIRQGTRPGELIPIVMARSTEMVIAQLAVLKCGAAYVPVDPQFPLERQQFMIDDCRAERAIATTQAVCRAPVRWTVLDEDLLSHGPADNPTVVQAAGSPAYVMYTSGSTGQPKGVVVPHRAIHRLVVANGYAEIGPDDTLGHCSNPAFDASTFEIWGALANGARVVIVAQEDVLDPQRLAQELLRQRVNVLWLTVGLFNQYAQALGSVFRQLKCLLVGGDALDARTIARVLGESAPQRLLNGYGPTETTTFATTYPIEAVAADATGIPIGRPIADTQVYLLDEQRQPVPIGAPGEIYIGGAGVACGYLNRPELTAERFIDDPFSGEPHARLYKTGDLGRWRSDGNIEYLGRNDQQVKIR	Bacteria	Caldimonas
collaborator	SchlegelellabrevitaleaDSM7029	Glidonin	DOI: 10.1038/s41467-023-42387-z	Phe-Glidonin-SchlegelellabrevitaleaDSM7029-A5	phe	FEAQVRRCPEATAAVFEGQRLTYAELNARSNQLARHLRERGIGPDTLVAICVERSLDLAVGLLGILKAGGAYVPLDPTYPRERLQYMLQDASPRVVLTQARLRATVATTTAQVVLLDQDAPLIAGHDDGNLAATAIGLEPHHLAYVIYTSGSTGAPKGVMVEHRGLCNLATLQIQAFGVGEGSRVLQFASASFDACAWECTMAWASGASLHLASPEQLLPGEPLLRTLRGEQITHATLPPVAVGALPHDAALDDLSTLVVAGEACPGALARHWSQGRRFFNAYGPTETTVCATLHLCDPRGEGLPPIGRPIANTQIYILDTSRRPVPIGVAGEIYIGGAGVARGYLNRPELTAERFIADPFGDGPNARLYKTGDLGRWRADGRIDYLGRNDRQVKIR	Bacteria	Caldimonas
collaborator	SchlegelellabrevitaleaDSM7029	Glidonin	DOI: 10.1038/s41467-023-42387-z	Pro-Glidonin-SchlegelellabrevitaleaDSM7029-A6	pro	FEAQVRRTPDAVAVVYEGRRLRYAELNARANQLAAHLRTLGVGPDQPVAICVERSLEMAVGLLGILKAGGAYVPLDPAYPGERLQQMLQDAAPPVVLTQERLRARLATTARVVSLDADWEVIAQRDPGNPNPQAIGLAPHHLAYVIYTSGSTGVPKGVAMPHRALVNLLEWHRGDARFRRPQRTLQFAALGFDVAFQETFATWSTGGTLILTDEATRRDPPALVRLLREEGVQRVFLPFVALHHLAEAVAVELPALPCLEDVVTAGEQLRITPAIASLFKHLPGCRLHNHYGPTESHVVTALTLDGAAHTWPELPDIGRPIGNARIYLLDGRRQPVPIGVPGEIYIGGLAVARGYLHRPELTAERFSADPFSDEPNARMYKTGDLGRWRADGQIEYLGR…	Bacteria	Caldimonas
collaborator	SchlegelellabrevitaleaDSM7029	Glidonin	DOI: 10.1038/s41467-023-42387-z	Trp-Glidonin-SchlegelellabrevitaleaDSM7029-A7	trp	FEAQVRRCPDAVAVVFEGRQLTYAELNARANQLARHLRERGIGPDALVAICVERSLDMVVGLLGILKAGGAYVPLDPAYPDERLQHMLQDAAPRVVLTQARLRAGLATTAQVVVLDDDAPLIARQDDSNLDPGAIGFKAHHRAYVIYTSGSTGTPKGVMVTHANLVNLLHALQPSYGLDEEDRVLQFVATSFDVAAQEIFGSLHRGATLVLRTEQWIGDADVFWSLCASHRITVLHLPAAYWQQVVLGAPPRLPDALRLVVVGGERMSASALSAWFARSGHRPTLINQYGPTETTVSATFHTVTRAEEGACIGRPIANTQVYLLDEQRQPVPVGVVGEIYIGGAGVARGYLGRPERTAERFSNDPFSAEPNARMYKTGDLGRWRADGNIEYLGRNDHQV…	Bacteria	Caldimonas
collaborator	SchlegelellabrevitaleaDSM7029	Glidonin	DOI: 10.1038/s41467-023-42387-z	Val-Glidonin-SchlegelellabrevitaleaDSM7029-A8	val	FEAQARQRPEAVALVCGERTFSYADVNERANRLAHHLIRQGTRPGELIPIVMPRSAEMVIAQLAVLKCGAAYVPVDPQFPLERQQFMIDDCRAERAIATTQTVCRATVHWTVLDEELLNLGRADNPAVVQAAGSPAYVMYTSGSTGQPKGVVVPHRAIHRLVVANGYAEIGPDDTVGHCSNPAFDASTFEIWGALANGARVVIVVQEDVLDPQRLAQELLRQRVNVLWLTVGLFNQYAQALGSVFRQLKYLLVGGDALDARTIARVLGESAPQRLLNGYGPTETTTFATTYPIEAVAADATGIPIGRPIADTQVYLLDEQRQPVPIGAPGEIYIGGAGVACGYLNRPELTAERFIDDPFSGEPHARLYKTGDLGRWRSDGNLEYLGRNDQQVKIR	Bacteria	Caldimonas
collaborator	SchlegelellabrevitaleaDSM7029	Glidonin	DOI: 10.1038/s41467-023-42387-z	Ala-Glidonin-SchlegelellabrevitaleaDSM7029-A9	ala	FEAQVQRSPQALALVCEGQQLSYAELNARANQLAHHLRQRGVGPDRLVAVCMERQAELVVALLGTLKAGGAYVPLDPAYPGERLQAMLQDAAPSVILTQTALLPGLADQAAEVIAVDAQLAELPKTNLPAAELGLTADHLAYVIYTSGSTGTPKGVMLEHRNAGNFIHWARSAFSEEHLAHTVFSTSVNFDLSIFELFVPLAVGATVHLVKNALDLSGREAVSLLNTVPSAVNALIDAGRLPEAIQAVNVAGEALKRELVEKIFAANPKVRCVTNLYGPTETTTYSTQVRMARSQPFAPHIGRPISNTQVYILDEHRQPVPIGVVGEIYIGGAGVARGYLRRPELTAERFIDDPFSEAPNARMYRTGDLGRWRADGQIEYLGRNDHQVKIR	Bacteria	Caldimonas
collaborator	SchlegelellabrevitaleaDSM7029	Glidonin	DOI: 10.1038/s41467-023-42387-z	Ala-Glidonin-SchlegelellabrevitaleaDSM7029-A10	ala	FEAQVQRSPQALALVCEGQQLSYAELNARANQLAHHLRQRGVGPDRLVAVYMERQAELVVALLGTLKAGGAYVPLDPAYPGERLQAMLQDAAPSVILTQTGLLPGLIDQAAEVIAVDAELAEQPKTNLAAAELGLTAEHLAYVIYTSGSTGTPKGVMLEHRNAGNFIHWARSAFSEEDLAHTVFSTSVNFDLSIFELFVPLAVGATVHLVKNALDLTGREAVSLLNTVPSAVNALIDAGRLPEAIQAVNVAGEALKRELVEKIFAAHPKVRCVTNLYGPTETTTYSTQVRMERSQPFAPHIGRPIANTQVYILDEQRQPVPIGVVGEIYIGGAGVARGYLRRPELTAERFIDDPFSEVPNARMYKTGDLGRWRADGQIEYLGRNDHQVKIR	Bacteria	Caldimonas
collaborator	SchlegelellabrevitaleaDSM7029	Glidonin	DOI: 10.1038/s41467-023-42387-z	Ser-Glidonin-SchlegelellabrevitaleaDSM7029-A11	ser	FEAQVARTPHATALIHGEQGVSYAELNARANRLAHHLRRLGVRPDSRVALCVERSVEMVVGLLAVLKAGGGYVPLDPEYPVERLRHMLQDSGPIVVLVDTAGREALEQADDRNLERVPRLHLQADAGQWAEAPAHNIDAATLGLKPTHLAYVIYTSGSTGRPKGVMNEHRGVVNRILWMQDAYPLDERDVVLQKTPFSFDVSVWEFFWPLMAGARLVMARPEGHKDPAYLSEVIRRTGVTTLHFVPSMLQVFLAHEQAANCRSVVRVMCSGEALPASLVHTFHERLPRAELHNLYGPTEAAVDVTAWACQAGDDSTVIPIGRPIANTRLYILDEHLQPVPVGVAGELYIGGVQVARGYLNLPELTAERFIDDPFSAEPNARMYKTGDLGRWRSDGNIEY…	Bacteria	Caldimonas
collaborator	SchlegelellabrevitaleaDSM7029	Glidonin	DOI: 10.1038/s41467-023-42387-z	Ala-Glidonin-SchlegelellabrevitaleaDSM7029-A12	ala	FEAQVQRSPQALALVCEGQQLSYAELNEKANQLAHHLRQRGVGPDRLVAVYMERQAELVVALLGTLKAGGAYVPLDPAYPGERLQAMLQDAAPSVILTQTALVPGLADQAAEVIAVDAQLAEQPKTNLPAAEIGLMADHLAYVIYTSGSTGTPKGVMLEHRNAGNFIHWARSAFREEDLAHTVFSTSVNFDLSIFELFVPLAIGATVHLVKNALDLTGREAVSLLNTVPSAVNALIDAGRLPEAIQAVNVAGEALKRELVEKIFAANPKVRCVTNLYGPTETTTYSTQVRMERSQPFAPHIGRPIANTQVYILDEHRQPVPIGVVGEIYIGGAGVARGYLRRPELTAERFIDDPFSEAPNARMYRTGDLGRWRADGQIEYLGRNDHQVKIR	Bacteria	Caldimonas
collaborator	SchlegelellabrevitaleaDSM7029_1	Glidopeptin	DOI: 10.1073/pnas.1720941115	Ser-Glidopeptin-SchlegelellabrevitaleaDSM7029-A1	ser	FEAQVQRTPDAVAVVAGEQRVSYAELNARANQLARELRRRGVGPNQRVGVCLQRSVEMVVALLATLKAGGAYVPLDPDYPEERLRHMLQDSAPVVVLVDAAGREALGQDGLDLQTDVAAWSALSTDNLASTGLTQRHLAYVIYTSGSTGRPKGVMNEHRGVVNRLLWMQQAYALGQHDVVLQKTPFSFDVSVWEFFWPLMTGAQLVMARPEGHKDPAYLAQLIQAAGVTTLHFVPSMLQVFLGHEGAAACRSLQRVICSGEALPAALARSCLAQLPQAQLHNLYGPTEAAVDVTAWTCEPGQVGASVPIGRPIANTQMYILDEQRRPVPRGVAGELYIGGVQVARGYLNLPELTAERFIADPFSADPEARLYKTGDLGRWRDDGAIDYLGRNDFQVKIR	Bacteria	Caldimonas
collaborator	SchlegelellabrevitaleaDSM7029_1	Glidopeptin	DOI: 10.1073/pnas.1720941115	Gln-Glidopeptin-SchlegelellabrevitaleaDSM7029-A2	gln	FEAQVQRTPDAVAVIDGDVQLRYADLDRRANQLAHYLRAQGIGPEQRVGVALERNAQMLVAVLGILKAGAAYVPLDPAYPNARLAYLLADAEPALVLTQASLLEVLPAQALVALDTQWPEIAAYPDTAPSWPTSRPDQLAYVIYTSGSTGQPKGVMVEHRSVVNLWWGLEQRIFRDHPACRRVSLNAPIAFDASVQQWVQLLSGRTLVLVPEAVRRDPVALRDFLNEQQVDVFDCTPSQLALMQADGHEVSPVFPRVTLVGGEAIPAALWQSLAARPGQACYNVYGPTECTVDTTCAPITADVSVPHLGRPLANARVVLLDARLAPVPLGVAGEIYIGGAGLARGYLNQSELTAERFVQDPYRPGQRLYKTGDLARRLPDGRLEYLGRNDFQVKVR	Bacteria	Caldimonas
collaborator	SchlegelellabrevitaleaDSM7029_1	Glidopeptin	DOI: 10.1073/pnas.1720941115	Dab-Glidopeptin-SchlegelellabrevitaleaDSM7029-A3	dab	FEAQAEHAGECLAVDDGRQRLGYAELNRRANQLAHHLRYLGVGPDTRVALCAERGAEMVVALLAIFKAGGAYVPLDRDYPGDRIAYMLQDSAPVVLLCSPATREVVAPHRPPGLPLLDLHADAPCWQDAPSHNLSPQAIGLTSAHLAYVIYTSGSTGRPKGVMIEHRGLVNYSLDAIRWFGLAPDDRVLQQNSLNFDLSIEEMLPALLAGATLVPSDELFGLQDGRHPGRPSVVHLTAAHWHQLVGEWSGAGLGRPAALAGVRLVNVTGDALAVQKLRQWDTLAPPETRLINTYGPTEITVSCSAAYVRHDPRASRVSIGRPFANTCLYILDERREPVPVGVAGELYIGGAGVARGYLNLPDLTAQRFLQDPFNPGQRLYKTGDLARWRPDGEVEFIGR…	Bacteria	Caldimonas
collaborator	SchlegelellabrevitaleaDSM7029_1	Glidopeptin	DOI: 10.1073/pnas.1720941115	Lys-Glidopeptin-SchlegelellabrevitaleaDSM7029-A4	lys	FESQAAQRPDALALVQGGHTLRYGELNAEANRLAHHLRQLGVGADDRVALYATRSVDTIVALLAILKAGAAYVPLDAGYPAERLVHMLRDSAPVALLTQGGAPAWVHEALGEGVPVLDLQADAAAWQQHDERDLGPSHTDEGHHHLAYVIYTSGSTGRPKGVMVEHRSVVNQVTALARRIALQPTERVLQFASLSFDASVEEVFATLTHGATLVLRSDEWLSDAGRFWALCEAHGIAVVDLPTQFWAQLALEQQPVPSTVRQVIIGGEAVSERALQAWFSTPGHRPRLLNTYGPTEATVSATWHEATGETQDARTIGRPSEGTRVYILDAHRRPVPIGVPGELYIGGVQVARGYLNLPEQTAERFLANPWWPGERLYKTGDLGRWWPDGRVEYLGRNDF…	Bacteria	Caldimonas
collaborator	SchlegelellabrevitaleaDSM7029_1	Glidopeptin	DOI: 10.1073/pnas.1720941115	Thr-Glidopeptin-SchlegelellabrevitaleaDSM7029-A5	thr	FEAQAQATPNVIALVHGDEQLSYGELNDRANRLAHHLRREHGIGPDSRVALCVERSVEMVVALLATLKAGGAYVPLDPAYASERLLATLQDSQPRLVLLDAIGRQALGQLEGQPVLDLQSDAGRWADASTENLDVGVQPQHLAYVIYTSGSTGQPKGVMVEHAQVARLFGATAAWFGFGPEDRWSLFHSIGFDFSVWEIWGALLHGGRLVIVPLETARSPAAFHQLLCQQGITVLNQTPSAFQQLVSAQGEAPQPHQLRHIVFGGEALELRTLKPWYEREVNRGTQLRNMYGITETTVHVTWRALQPGDAERPGPSPIGGRLPDLRLYVLDAERQPVPVGVTGELYVGGAGVARGYLNRAELTAQRFVDNPFVPGERLYKTGDLGRWLIDGTLEYLGRN…	Bacteria	Caldimonas
collaborator	SchlegelellabrevitaleaDSM7029_1	Glidopeptin	DOI: 10.1073/pnas.1720941115	Leu-Glidopeptin-SchlegelellabrevitaleaDSM7029-A6	leu	FEAQARHTPDACALQQGRQQIGYRELNARANQLARHLRRLGVQPDSRVAVCLDRSPEMVVALLAVLKAGGAYVPLDPGYPPDRLDYLLQDSAPVAVLTHARIDPAVQARLCVTMARHGSGAPVIDLLGDAAAWQHEDGSDLPPAGLTSRHLAYVIYTSGSTGQPKGVMVEHRSLHNLLAWHIDSFSLQPGSRSSATAGVGFDACTWEVWPPLCSGGVLVLPPADVAGDPQALLAWWQAERLDVSFLVTPLAELAYATGRVNAGVRQVLIGGDRLRRRPPQLPPGQALVNNYGPTEATVVATSGTLHEHDGALHIGRPIDNTRVYILDAEGRPTPQGVPGELYVAGVGVARGYLGRPELSAERFLQDPFVAGDRMYKTGDLGRWRADGSIEYLGRNDFQV…	Bacteria	Caldimonas
collaborator	SchlegelellabrevitaleaDSM7029_1	Glidopeptin	DOI: 10.1073/pnas.1720941115	Dab-Glidopeptin-SchlegelellabrevitaleaDSM7029-A7	dab	FEGQVLRHPDAVAVDDGEQRLSYLKLNRRANQLARHLRGLGVRPGDRIALCAERGTAMVVGLLAILKAGAAYVPLDPAYPAERIAYMLQDSAPAAVLCTATTRESLAAHLPAELPVLDLRADVPRWSHQPGYNPTRQEVGVGPDHLAYVIYTSGSTGRPKGVMVEHRGLVNYTLEAVRWFELGPADTVLQQNSLNFDLSIEEMLPALASGAALTPSRQTFGLDTADNSEGRGRRPSMIHLTAAHWHSLVGEWSQPGGAARARVLLDGVRLVNVTGDALSQHRLKQWDAVKPAATRLINTYGPTEITVSCSAAYVQHEPGAARVSIGRPFANTRMYLLDPHGQPVPVGVAGELYIGGAGVARGYLNLPELTAERFLQDPFKPGQRVYKTGDLARWRPDGQ…	Bacteria	Caldimonas
collaborator	SchlegelellabrevitaleaDSM7029_1	Glidopeptin	DOI: 10.1073/pnas.1720941115	Ser-Glidopeptin-SchlegelellabrevitaleaDSM7029-A8	ser	FEAQVQRTPEAIAVVAGEQRVSYAELNARANQLARELRRRGVGPDQRVVVCLQRSVEMVVALLATLKAGGAYVPLDPDYPEERLRHMLHDSAPVVVLVDAAGREALGQGGLDLQADSAAWSSLSTDNLASTGLTKRNLAYVIYTSGSTGRPKGVMNEHRGVVNRLLWMQQAYGLGEHDVVLQKTPFSFDVSVWEFFWPLMTGAQLVMARPEGHKDPAYLAQLIQAAGVTTLHFVPSMLQVFLGHEGAAACRSLQRVICSGEALPAALARSCLAQLPKAQLHNLYGPTEAAVDVTAWTCEPGKVGTSVPIGRPIANTQMYILDEQRRPVPPGVAGELYIGGVQVARGYLNLPELTAERFIADPFSADPEARLYKTGDLGRWREDGAIDYLGRNDFQVKIR	Bacteria	Caldimonas
collaborator	SchlegelellabrevitaleaDSM7029_1	Glidopeptin	DOI: 10.1073/pnas.1720941115	Thr-Glidopeptin-SchlegelellabrevitaleaDSM7029-A9	thr	FEAQAAATPEGIALVHGEEQLSYGEMNARANRLAHHLRKEHGIGPDSLVALCTERSVDMVVALLATLKAGGAYVPLDPAYASDRLLATLQDSQPRLVLLDARGRQALGQLDGLPVIDLQADAPHWADGPTDNLDVGVQPQHLAYVIYTSGSTGQPKGVMVEHAQVARLFGATAAWFGFGSEDRWSLFHSIGFDFSVWEIWGALLHGGRLVIVPLETARSPVAFHQLLCEQGITVLNQTPSAFQQLIAAQGEAHQPHQLRHIVFGGEALELRTLKPWYEREINRDTQLSNMYGITETTVHVTWRALQPGDAERPGPSPIGGRIPDLRLYVLDAERQPVPVGVTGELYVGGAGVARGYLNRAELTAQRFVDNPFVPGERLYKTGDLGRWLIDGTLEYLGRN…	Bacteria	Caldimonas
collaborator	SchlegelellabrevitaleaDSM7029_1	Glidopeptin	DOI: 10.1073/pnas.1720941115	Asp-Glidopeptin-SchlegelellabrevitaleaDSM7029-A10	asp	FEAQVRRTPAALAGVCGDRPLSYRELNARANQLARELRARGVGPDRLVAVCAERGVDLMVALLGVLKAGGAYVPLDPGYPAQRLQHMLEDAAPSVLLTQRHLEPLLPAHGAEVLRLDEDWPRIARHDDGDLDTQAVGLSPRQLAYVLFTSGSTGRPKGVMIEHRSIVNYACHAARQFDVQNGHGSLVFTSFSFDLTLTSVYPPLLCGRPVRLCPEGNDLAVWREQLLAGRELAPVKLTPSHLALLQQALPADAVAGRIRTLVLGGEPLKGAALQWWREQAPEMRIFNHYGPTEATVGCVVHEVTGPLPDGAVPIGRPITHMRIYVLDALRQPVPVGVLGEIYIGGAGVARGYLGRPDLTEERFLPDPYAAEADARMYRTGDVARWRADGTLEYLGRNDH…	Bacteria	Caldimonas
collaborator	SchlegelellabrevitaleaDSM7029_1	Glidopeptin	DOI: 10.1073/pnas.1720941115	Gly-Glidopeptin-SchlegelellabrevitaleaDSM7029-A11	gly	FEAQAQRTPDATALVCGEQRYSYAELNRRANQLAHHLRGLGAGPDGLVALAVERSPEMVVGVLGILKSGAAYVPLDPAYPADRLAYMVEDARPLCLLTQRSLQSLLPAGGVPQVLLDEQWPEIAAGATSNPAVSGLSPHHLAYVIYTSGSTGRPKGVMVEHGNVVNFLLSMSQAPGIRADDVLLAVTSLSFDIAGLELFLPLLCGARIVLATREDAADAERLRALMERWAVSIMQATPSTWRLLMQQDWPVLPRPLKVLCGGEALPVNLAEQLLERVPEVWNLYGPTETTIWSTLARLTEAAPHIGRPIANTRVYVLDAAQQPVPVGVPGELYIGGVGVTRGYLGRPELTAERFVQDPFEPGQRLYRTGDLARWQPDGTLAYLGRNDFQVKLR	Bacteria	Caldimonas
collaborator	SchlegelellabrevitaleaDSM7029_1	Glidopeptin	DOI: 10.1073/pnas.1720941115	Val-Glidopeptin-SchlegelellabrevitaleaDSM7029-A12	val	FEAWAERTPYATALSGEGGRLNYAELNRRANRLAHHLLSLGVRPDDRVAICMERGLEMVVAMLATLKAGGAYLPLDPSYPPDRLAHMLADSTPVALLTVSDLQSRLPASPGLPQPVVVVDAMAEALAVLPETNPDAMALGLQARHLAYVIYTSGSTGTPKGVMVEHRNVLRLAVNGGFAPLTPDDCIAHGANPVFDAATWEIWGGLLNGARVCVVPQAVMLDPAGLRATLQAEGVSALWLTVGLFNQYADVLADSFGQLRYLITGGDALDPRIIARTLAGPRPPQHLLNGYGPTETTTFATTFHITALPPGAHGVPIGRPIGNTSVYILDAHHSPVPVGLVGEIYIGGAGVARGYLARPELTAERFLRDPFSADPTARMYKTGDRGRWLPDGTIEFHGR…	Bacteria	Caldimonas
collaborator	SchlegelellabrevitaleaDSM7029_2	Glidomide	DOI: 10.1002/anie.202203591	His-Gldiomide-SchlegelellabrevitaleaDSM7029-A1	his	ERQARLGPDRPAVACADGRLDYDTLVRRADVLAARLVAAGAAPDRIVAVCLPRSVDLVVALLAVLKSGAAYLPLDPGYPPERLDYMQHDSGACCLVADARSAAIAAAGLPVVLIGAPAPAALPNVPPRPPHPDQLAYVIYTSGSTGRPKGVAITHRNACHSTLARHRWYERPVSAYLMLSSVAFDSSVAGIFWTLTQGGLLVLPEDDAHRDVAALARLVEHHRASHLLALPSLHAQLLDAEPARLATLTDVIVAGEACSATLVEAHHRVLPQAALYNEYGPTEASVWSLAHATRPGEDPVPIGRPIPFIEAWVLDTALQPLPPGVQGELYLGGPALARGYLGRPDLTADRFVPHPTAAGQRLYRTGDRVRLNAAGQAEFLGRTDQQVKIR	Bacteria	Caldimonas
collaborator	SchlegelellabrevitaleaDSM7029_2	Glidomide	DOI: 10.1002/anie.202203591	Dab-Gldiomide-SchlegelellabrevitaleaDSM7029-A2	dab	FDSTARARAGELAVCDGHTSLRYAELAQRARGLATALQQAGAGPERPVAILLPRSVDYLVAIVATQFAGAPWLPLDMTLPQARLVQMLSLAAPPVLVAAEVCDVAPRLRTALARPPQWVSPQAVGEGAPRLWPAHPQQLAYLIFTSGSTGTPKAAMVPAGPMLNHLLGKIEQLDLGPSDRIAQTASPCFDISVWQFLTALLCGASVHIVPDSCTRDGAALLRHVNAEGLTVLESVPSLMRGMLDDPSSPAQLPTLRCLLPTGEALPPEVARQWFRHYPGVPLINAYGPAECADDVALWRLDGPPDTSLAHLPIGTPTGNLRLHVVNDALQLQPPGVIGELAIAGAGVGRGYLGAPALTAERFVPDPYGPPGSRLYRSGDLARQAPDAVLSFVGRRDHQL…	Bacteria	Caldimonas
collaborator	SchlegelellabrevitaleaDSM7029_2	Glidomide	DOI: 10.1002/anie.202203591	Asp-Gldiomide-SchlegelellabrevitaleaDSM7029-A3	asp	AQWARLQPEALAVQGEDASLSYAELEARATQLARRLAGAGVAPERCVAIAAPRSAAYGVAVLAVLKAGGHFLPLEPSQPVQRLRELLAASGARWLLSTDADLAARLTEGMAVRTLPAGLETDGATSTLPEADLPAPPPPGQSAYLIYTSGSTGTPKGAVLSHGGLAQYTAGLQQRLGLAPGARHAMVSTVSADLGHTTLFGALASGGSLHLLPAPLAFDPDGYAAWMREQAIDVLKIVPSHLAGLLAAAAPCLPRQTLVLGGEAAAPALLARLRQLAPTLRIVNHYGPTETTVGVLTFEAAPDTPAAELPLGRPLPGVRLRVLDHALQPVPPGVPGELYIGGASVARGYLGRADLTADRFVPDPEHPGQRLYRSGDRVCRTEDGLLHFLGRADEQVKIR	Bacteria	Caldimonas
collaborator	SchlegelellabrevitaleaDSM7029_2	Glidomide	DOI: 10.1002/anie.202203591	Thr-Gldiomide-SchlegelellabrevitaleaDSM7029-A4	thr	FERQARATPDAVALCYGNARLSYDQLNRQANRLAHALVALGVGPERKVALCLPRSHELVVAILAVLKAGGAYVPLDTAAPAGRQGQVLEDSGAGWLLHTGRGELPALPPAVRAHDIRTLTADQPDHDLPPRVQPQQLAYVIYTSGSTGRPKGVAVTQANVLRLFDVTCSGFDFGADDVWTLFHSCAFDFSVWELWGALLHGGRLVLVPLEVARDSAALATLLQREAVTVLNQTPSAFYRLSETLCAASPPPPLALRLVIFGGEALDPARLAPWFARFGDQRPQLVNMYGITETTVHVTRRTLSSADAGAGSVIGRPLDDLRLYLLDDNLAPVPPGVAGELYVGGAGLARGYLGRGDLTAGRFVPDPHGREPGGRLYRSGDLARRRADGEIEYLGRADQQ…	Bacteria	Caldimonas
collaborator	SchlegelellabrevitaleaDSM7029_2	Glidomide	DOI: 10.1002/anie.202203591	Ser-Gldiomide-SchlegelellabrevitaleaDSM7029-A5	ser	FEQQAAATPEAPALFFGEQVLSYRELNRRADRLAARLRGRGVRSDQVVAVCLERSTEMVVALLGVMKAGAAYLPLDPDYPDERLRYMCDDAQPVLLLTTRTTPWQAGEAAPPRLLLDAPDTDGEGAAVLPPPDLHPEHLAYLIYTSGSTGRPKGVGVPHRGLLNRLAWMQAEYGLDRRDRVLQKTPFSFDVSVWEFFWPLMTGAALVVAAPGEHRDSERLAALIRERGVTTLHFVPSMLGAFLDDPASAGCQSLRRVICSGEALPHELQQRCLATLPDAALYNLYGPTEASIDVSHWTCRRDDADATSVPIGHPIWNTSLHVLDAALQPLPVGVAGELYLGGVGLARGYLGKPALTAERFVPDPYSAQPGARLYKTGDLARRRADGAVDYLGRLDHQIK…	Bacteria	Caldimonas
collaborator	SchlegelellabrevitaleaDSM7029_2	Glidomide	DOI: 10.1002/anie.202203591	Arg-Gldiomide-SchlegelellabrevitaleaDSM7029-A6	arg	FAQRAVRMPDQVAVVLDGQQLSYRELNERANTIAHRLLAAGVTAETRVGLCVERSLEMVAGLLGILKAGGAYVVLDPALPVERITELCEDAAIAVVLGQTVLSGMTAALPRRIVTLAIDKLVQPDVPRHDPDLRLDPRQLAYLVYTSGSTGRPKAVAVPHAALVAHVQAMAERFGLTASDRVLQFSTLSFDASVDQLFPALLSGATVVLRGPQLWDSGELRERLARERITVADFPTSYWMQALREWSRATGPECSALRLVSVGGEALPPDALTLRAAAGLAHARLLNAYGPTEATVTAALHDCDAAPHPDDTAGIPIGRPVPGRELHVLDDALRPVAVGVAGELYIGGELLARGYHGRADLTAERFLPDPFGAPGTRLYRSGDRVRWRADGRLEYLGRG…	Bacteria	Caldimonas
collaborator	SchlegelellabrevitaleaDSM7029_2	Glidomide	DOI: 10.1002/anie.202203591	Dab-Gldiomide-SchlegelellabrevitaleaDSM7029-A7	dab	FERQVARTPGAPAARCGDITLSYQDLRQRADHLGDALTARGVGPDDVVALYDRRGLDLLVMMLAVFKAGAAYLPLDPSHPAARLQQLLDRSGARWVLQGEQGGPALGEALQALGRHAPALWRPAELVQGPHDGGIAARKPLPPAAAGRCLAYVIYTSGSTGEPKGAMVERRGMLNNLLQKHVQLGLGSTDVVAQTAPASFDISVWQFLSALLCGATVDIVPDDVVRDPRALLAAVRARGVTVLEAVPSLIQALLDEEHQEALPLRWLLPTGEALPPEVVRRWFTAHPQVPLLNVYGPAECADDVSLHALTAPLPADCAHTPIGRPVAHLRLQVLDDHLQQVPVGVAGELCVSGIGVGRGYLRDPARTAVAFVPDPYARVPGERLYRTGDIVRRRSDGVL…	Bacteria	Caldimonas
collaborator	SchlegelellabrevitaleaDSM7029_3	Glidobactin	DOI: 10.1111/j.1462-2920.2007.01278.x	Thr-Gldiobactin-SchlegelellabrevitaleaDSM7029-A1	thr	TYAALNERANRLAHHLIGLGVGPEDIVAVCLERSADLVVSLLAILKTGAAYLPLDPHYPAARLGFMLADARPAATVTTAGLASQAPGDGTRVHLDDPALVDALRRQPAHDPSDAERIRPLDPEHPAYVIYTSGSTGKPKGVVVPHQNVVRLLDSTEAWFGFGPGDVWTLFHSYAFDFSVWECWGALLRGGRLVVVPYEVSRSPAEFLRLLVHEGVTVLNQTPSAFQQLMQADRDDPTLGQRLQLRFVIFGGEALDVRRLQDWYTRHADTAPQLVNMYGITETTVHVSYLPVTREIAHGQAQHQIGHRIPDLRTYVLDAALRPVPVGATGELYVAGAGLARGYLGRPALTAQRFVADPFGASGSRMYRTGDLARWRADGGLDFLGRADEQVKVRGFRIEL…	Bacteria	Caldimonas
collaborator	SchlegelellabrevitaleaDSM7029_3	Glidobactin	DOI: 10.1111/j.1462-2920.2007.01278.x	Lys/OH-Lys-Gldiobactin-SchlegelellabrevitaleaDSM7029-A2	lys	TYAELDRRANRVAAGLRARGVTQGQPVATLISYSHELIIAFVAVLKAGGVYLPLGPTDPRVPEKIDDAAPRLILTTTQDRAHLGDALAAQAVLLDELLGIDEGKDMPFDGPELREGDAAYVIYTSGSTGTPKGVEVSHGNLNLSYLAWCQAYRFDTPGRPVTLQLAGPTFDLFIGDVSRTLGCGGCLILCPRDWLLDAEKVHGLMTREKVTFGDFPPVVLRELIRYCSQTGQRLDGLDTLVCGADVWFGHELHAAQALCGPHARVLGSYGVTEATIDSSVFDPALHPLAPGDVVPIGRPLPSCELYVVDERLQLTPIGVPGELLIAGPAVSQRYLNNPALTADKFLSGSIDASGCVVRADGPTRFYRTGDLCRLLPDGTIEFMGRRDHQVKVRGLRVEL…	Bacteria	Caldimonas
collaborator	SchlegelellabrevitaleaDSM7029_3	Glidobactin	DOI: 10.1111/j.1462-2920.2007.01278.x	Ala-Gldiobactin-SchlegelellabrevitaleaDSM7029-A3	ala	YRELEAAAAATAAALQGVGVRRGDRVGIYMGRHPHTVTAMLAINRLGAAFVPLDPDHTLEWNRHIVEDAALSALVCRDGLVASAERFGLPVVTARLADTAAAAPEPVARDLAGECAYVIYTSGSTGRPKGVAVSHESVCHNVLAMRDEMRLTNTSRMAQYVSPIFDVVLGEIFPALASGAAVVFGDRQRLLPGPGLIEWLASERITHWWIVPSALAMVPAAPLPDLQVLIVAGEACPPEVARRWAGGRRLLNGYGPTECAIVVSLTDYWAEGERLVLRPMGGAQLYVLDEAFREVPAGAAGELFLGGICVAQGYLGLPGRTAHTFIADPCSGNTGARLYRTGDVVRRLDDGSIQFIGRVDRQVKIRGFRVELDAVRAALLQLPGVRAA	Bacteria	Caldimonas
collaborator	ChitinimonaskoreensisDSM17726	Chitinipeptin	not published_Xiaoying Bian's lab	Ser-Chitinipeptin-ChitinimonaskoreensisDSM17726-A1	ser	FEAQARRTPAAIALEADGAQLDYAGLNARANRLARRLAALGVAADRPVAVCAERGTAMVEALLATLKSGGCYLPLDPELPAERLAELLRDSAPAALLVDAAGAAALAGVDLGAVPRLHLLVDAAQWSALAADDLDLPFDDGQLAYVIYTSGSTGKPKGVMNAHRGVVNRLLWMQEAYGLGEHDVVLQKTPFNFDVSVWEFFWPLLAGARLVLARPGGHKDPAYLAGLIEAAGVTTLHFVPSMLQAFLAGDAADRCRSVARIFCSGEALPAALARQCLARLPWAELHNLYGPTEAAVDVTAWPCRPDDARATVPIGRPIANTRIHILDERLQPVPIGVAGELHIGGVQVARGYLNRPELTAERFIDDPFGAVGDRLYKTGDLARWNADGTIEYLGRNDFQ…	Bacteria	Chitinimonas
collaborator	ChitinimonaskoreensisDSM17726	Chitinipeptin	not published_Xiaoying Bian's lab	Lys-Chitinipeptin-ChitinimonaskoreensisDSM17726-A2	lys	FEAQARRAPEAIALLHGERQLSYAELDARAERLAQRLRQFGVAPDARVALHARRSPELVVALLAILKAGGAYVPLDPDYPAERLAQMLADSGPVALLYQGGLPDELARALDPALPKLDLDQPDFGDTDPVSAKAAERPVAHAGNLAYVIYTSGSTGVPKGVMVEHRSVVNQVTALAARLGLEAGQRMLQFASPSFDASVEEVFATLASGATLVLRSDAWLADAATFWDLCAAQRIAVVDLPTQFWTQLALARRPIPTCVRWAIIGGEAVGEAALRAWFDGPGSRPRLLNTYGPTEATVSATALEVAGVGDWRSIGRPSAKVVVRILDALGQLVPVGVAGELHIGGVQLARGYLNRPELTAERFVDDPFGEPGERLYKTGDLARWKADGTIDYLGRNDFQ…	Bacteria	Chitinimonas
collaborator	ChitinimonaskoreensisDSM17726	Chitinipeptin	not published_Xiaoying Bian's lab	Glu-Chitinipeptin-ChitinimonaskoreensisDSM17726-A3	glu	FEAQAARTPDAPAIDDGERCLSYAELNARANRLARRLRAHGVGPERLAALAVDRSIEMMVGLLAILKAGGAYLPLDPAYPPERLARMLDQAGPVCLLAPEALAARLPATGLPRLDAAVVPDEADGNLDGADDAAALAYVIYTSGSTGVPKGVMVEHRQLANLWTALEAAIYRRHPACRRVGVNAPLAFDSAVKQWLQLLSGRTLVLVPAEVRLDGAALRDFAAEQRIDALDCTPSQLGLLLDAGLGRAAGAPAVLLAGGEPIGPALWQRLAGLPATASYNVYGPTECTVDSTAARVAADEPPHIGRAVANARVYLLDAQRRPVPVGTAGEIHIGGAGVARGYLGQPALTAERFLADPFGPPGARMYRTGDLARRLPGGALEYLGRNDFQLKIR	Bacteria	Chitinimonas
collaborator	ChitinimonaskoreensisDSM17726	Chitinipeptin	not published_Xiaoying Bian's lab	Lys-Chitinipeptin-ChitinimonaskoreensisDSM17726-A4	lys	FEAQARRAPEAIALLHGERRLSYAELDARAERLAQRLRQFGVAPDARVALHARRSPELVVALLAILKAGGAYVPLDPDYPAERLAQMLADSGPVALLYQGGLPDELARALDPALPKLDLDQPDFGATDPVPAEADALPRLVTAAERPVAHAGDLAYVIYTSGSTGVPKGVMVEHRSVVNQVTALAQRLGLEPGQRMLQFASLSFDASVEEVFATLACGATLVLRSDAWLADAATFWDLCAAQRIAVVDLPTQFWTQLALARRPIPACVRWIIIGGEAVGEAALRAWFDGPGSRPRLLNTYGPTEATVSATALEVAGADDWRSIGRPSANVVVRILDALGQLVPVGVAGELHIGGVQLARGYLNRPELTAERFIDDPFGAPGERLYKTGDLARWKADGTI…	Bacteria	Chitinimonas
collaborator	ChitinimonaskoreensisDSM17726	Chitinipeptin	not published_Xiaoying Bian's lab	Thr-Chitinipeptin-ChitinimonaskoreensisDSM17726-A5	thr	FEAQAARTPDAIAVTFGAQRLGYAELNARANQLAHHLRAQGLGPDRLAAICVERGLEMVVAILAVLKAGGAYVPLDPAYASDRLAATLADSRPVLALVDEVGRAALGADVDLPLIDLRDDDRWADASIENLADIGVKPQHLAYVIYTSGSTGVPKGVMVEHRNVVRLFGATDAWFGFGADDVWTLFHSFGFDFSVWEIWGALLYGGRLVVVPLATARAPAEFYQLLCDEGVTVLNQTPSAFQQLIAAQGEGGSAHRLRTVVFGGEALELRTLRPWYARPLNRATQLVNMYGITETTVHVTYCPLQPADVERPGPSPIGVRIPDLRLYVLDGQRQPVPIGVAGELYVGGAGVARGYLNRPELTAERFVDNPFGAAGDRLYKTGDLARWRTDGTIEYLGRN…	Bacteria	Chitinimonas
collaborator	ChitinimonaskoreensisDSM17726	Chitinipeptin	not published_Xiaoying Bian's lab	Leu-Chitinipeptin-ChitinimonaskoreensisDSM17726-A6	leu	EARAARAPDAVALEQGGRRIAYAELDAEAGRLARHLRRLGVGPDVPVAVCLDRSPELVIALLAVLKAGGAYLPLDPAYPAERLDQLLHDAAPRALLTHALLGAALAAQLCIGAARLDAACPVIDLQADAGRWQDEPAGPLPDDGLRPRHLACVIYTSGSTGVPKGVMVEHRGLVNLVAWHGRAFGLGPDSRCSSTAGLGFDASGWEIWPVLCHGGRLLLPPPAAHDPQALLDWWRAQPLDVGFLVTPLAEFACASGRANPRAHTLLIGGDRLRRWPDGLPAGQALVNNYGPTEATVVATSGRLQPGGPVHIGRPIANTRIYLLDAAMRPVPVGVAGELYIGGDGLARGYLNRPALTAERFVDDPFRPGERLYRSGDLARWLPDGTIEYLGRDDFQVKIR	Bacteria	Chitinimonas
collaborator	ChitinimonaskoreensisDSM17726	Chitinipeptin	not published_Xiaoying Bian's lab	Dab-Chitinipeptin-ChitinimonaskoreensisDSM17726-A7	dab	FEAQAARTPAAIAIDDGERRLSYAELNRQANRLAHHLRALGVLPDARVALCAERGAPMLVGLLAIFKAGGAYVPLDPDYPGERIAYMLRDSTPVAALCSSAARPALQRWLERPLPVLDLEADAAQWQRQPEHDPSPRAVGLNARHLAYVIYTSGSTGRPKGVMIEHRGLVNYTLAAIDWFGLGPGERVLQQNSLNFDLSIEESLPALLSGATLLPSAELFGLVRGQDRPGPAPTMVHLTAAHWHSLVGEWSRPGADTGQLDGVRLVNVTGDALSPHKLQQWDALRPAATGLINTYGPTEITVSCSAAYVRHDPAASRVSIGRPFANTRMYLLDAHGEPVPVGVAGELHIAGEGVARGYLNLPELTDARFLADPFVPGARMYRTGDLARWRPDGEVEFIG…	Bacteria	Chitinimonas
collaborator	ChitinimonaskoreensisDSM17726	Chitinipeptin	not published_Xiaoying Bian's lab	Ser-Chitinipeptin-ChitinimonaskoreensisDSM17726-A8	ser	FEAQARRTPAAIALEADGAQLDYAGLNARANRLARRLAALGVAADRPVAVCAERGTAMVEALLATLKAGGGYLPLDPELPAERLAELLRDSAPAALLVDAAGAAALADVALGGVPRLHLLADAGQWSALAADDLDLPFDDGQLAYVIYTSGSTGKPKGVMNAHRGVVNRLLWMQEAYGLGEHDVVLQKTPFNFDVSVWEFFWPLLAGARLVLARPGGHKDPAYLAGLIEAAGVTTLHFVPSMLQAFLAGDAADRCRSVARIFCSGEALPAALARQCLARLPWAGLHNLYGPTEAAVDVTAWPCRPDDARATVPIGRPIANTRIHILDERLQPVPIGVAGELHIGGVQVARGYLNRPELTAERFIDDPFGAAGDRLYKTGDLARWNADGTIDYLGRNDFQ…	Bacteria	Chitinimonas
collaborator	ChitinimonaskoreensisDSM17726	Chitinipeptin	not published_Xiaoying Bian's lab	Thr-Chitinipeptin-ChitinimonaskoreensisDSM17726-A9	thr	FEAQAARTPDAIAVTFGAQRLRYAELNARANQLAHHLRAQGLGPDRLAAICVERGLEMVVAILAVLKAGGAYVPLDPAYASDRLAATLADSRPVLALVDEVGRAALGADVDLPLIDLQADAGLWAEASIGNPDSTNVTPQHLAYVIYTSGSTGVPKGVMVEHRNVVRLFGATDAWFGFGADDVWTLFHSFGFDFSVWEIWGALLHGGRLVVVPLAMARAPAEFYRLLCDEGVTVLNQTPSAFQQLIAAQGEGGLAHRLRTVVFGGEALELRTLKPWYARPLNRATQLVNMYGITETTVHVTYCPLQPTDTERPGPSPIGVRIPDLRLYVLDGQRQPVPIGVAGELYVGGAGVARGYLNRPELTAERFVDNPFGAAGERLYKTGDLARWRADGTIEYLGR…	Bacteria	Chitinimonas
collaborator	ChitinimonaskoreensisDSM17726	Chitinipeptin	not published_Xiaoying Bian's lab	Asp-Chitinipeptin-ChitinimonaskoreensisDSM17726-A10	asp	FEAQAARTPLAPAVVLGARSLGYAELNGRANRLARHLRARGVGPDRLVAICAERSIELVVAILAVLKAGGAYVPLDPGYPAQRLRDMLEDAAPALLLTQSHLAATLPQGAAEVFALDADWPLLAGLPDGDLDAAAIGLNPRHLAYVIFTSGSTGRPKGVMIEHRSIVNYAVDIARRFDVAAGEGSLIFTSFSFDLTLTSFYPPLIAGRPVRLCPEGNDLQQWQQALLAGRALSPVKLTPSHLALLQQALPAEGLDGKVAALVLGGEALKGPALAWWRAHAPSTRIYNHYGPTETTVGCVVDAVEDPLPAAAPIGRPIANMRIHILDRHGQPVPVGVVGELHIAGVGVARGYLGRPDLSAERFVADPFAAEAGAAMYRTGDLGRRRADGRIEYLGRNDHQ…	Bacteria	Chitinimonas
collaborator	ChitinimonaskoreensisDSM17726	Chitinipeptin	not published_Xiaoying Bian's lab	Gly-Chitinipeptin-ChitinimonaskoreensisDSM17726-A11	gly	EAQAARTPAAIALEHDGRRLSYAELDARSNQLARHLRAHGLPPGAPVALAVERGPEMVVGLLGILKAGGAYLPLDPAYPAERLAYMLADARPARVLAQAATVAALPDAGLPLTRLDADWPEIAGHSAAALPADGEHARQLAYLIYTSGSTGRPKGVMVEHRSLVNFLCAMRAEPGLAADDTLLAVTSLSFDIAALELFLPLLCGARVVIAAREEAADPLRLRALAERCGASAMQATPSTWRMLVEQPWPELPRPLKVLCGGEALPPGLAARLLERVPVLWNLYGPTETTVWSTLRRLSAPRPDIGRPIANTRVHVLDAALRPAPVGVAGELYIGGDGVARGYLGRPELTAERFVDDPFRPGERLYRTGDLVRWQTDGSLDYLGRNDFQVKIR	Bacteria	Chitinimonas
collaborator	ChitinimonaskoreensisDSM17726	Chitinipeptin	not published_Xiaoying Bian's lab	Lys-Chitinipeptin-ChitinimonaskoreensisDSM17726-A12	lys	FEARAAGAPDAVALVHGDARLSYAELNARANRLARYLRRLGLRPDDRVAFCFERGFDSVVAMLAILKAGGAYVPLDPDYPPERLDRMLQDSAPVAVLTHAPVDAAVQTRLCIAVARLRGEVPLLDLQVDEPRWRHEDATDPAPAGDARSLAYVIYTSGSTGVPKGVMVEHRSVVNQVTALAQRLGLEPGQRMLQFASLSFDASVEEVFATLASGATLVLRSDAWLADAATFWDLCAAQRIAVVDLPTQFWTQLALARRPIPACVRWAIIGGEAVGEAALRAWFDGPGSRPRLLNTYGPTEATVSATALEVAGVGDWRSIGRPSAKVVVRILDALGQLVPVGVAGELHIGGVQLARGYLNRPELTAERFVDDPFGEPGERLYKTGDLARWKADGTIEYLG…	Bacteria	Chitinimonas
collaborator	ChitinimonaskoreensisDSM17726_1	Chitinimide	DOI: 10.1038/s41467-021-24645-0	Phe-Chitinimide-ChitinimonaskoreensisDSM17726-A1	phe	FEAHAAARPAAPAVLQDGTALSYAELNARANRLAHHLRAQGVGPETLVALCLERSADLLVALLAVWKAGGAYLPLDPAYPPARLAYMLGDARPALALGHEPTRAVLAAACAGLETPPSLLDLAADAARWADLPTADPGHAGLKPDQLAYVIYTSGSTGAPKGVMVEHGGVLNMARAQAQTFGIGPDGRVLQFASFSFDASAFETVLALAHGAALQLAPRGQRLAGEALLQLLRQDGITHATLPPAVLAALPPDAELPATPVLILAGEALPPGLARRWGQGRRLFNAYGPTEATVWASVHLCDPASEAASVPIGRAIAGAGLYLLDEVGEPVAPGEIGEIHIGGAGVARGYLGRPELTAERFVARGSERLYRTGDLGRLLPDGNLEYLGRDDFQVKLR	Bacteria	Chitinimonas
collaborator	ChitinimonaskoreensisDSM17726_1	Chitinimide	DOI: 10.1038/s41467-021-24645-0	Thr-Chitinimides-ChitinimonaskoreensisDSM17726-A2	thr	FAAQVAAAPEAVALVHEGDSLSYGELDRRANRLAHHLRAQGVGPDVLVAICAERSLEMVVGLLAVLKAGGAYVPLDPAYPAERLAYMLADSRPLAVLSHGPARAALGVALADLPAKPPVFDLDADWRHFPDHAPEIGDLAPHHLAYVIYTSGSTGQPKGVMVEQRNVARLFSATERWFGFGANDVWTLFHSFAFDFSVWEIWGALLHGGKLVIVPRATSRDPEAFYGLLCEQRVTVLNQTPSAFRSLVAAQAGSDARHALRTVIFGGEALDTAQLKPWYRDGRNAATQLVNMYGITETTVHVTYRPLSEADCDKAGSPIGERIGDLRLYLLDAHGAPVPIGVAGELHVGGAGVARGYLNRPELTAERFVASPFVAGDRLYKTGDLGRYRADGSLEYLGR…	Bacteria	Chitinimonas
collaborator	ChitinimonaskoreensisDSM17726_1	Chitinimide	DOI: 10.1038/s41467-021-24645-0	Ser-Chitinimide-ChitinimonaskoreensisDSM17726-A3	ser	FEDQAARHPAAVAVACEDAQLSYGELNARANRLARHLQAQGVGPDRRVAICAERSLEMVVALLAVLKAGGAYVPLDPDYPAERLAHMLRDSAPAAVLSHGPARAALAAALAELPAAPPAIDLDADAAAWADRPAGDLAAAAQASDLAYVIYTSGSTGLPKGAMNEHRAVVNRLMWMQDEYRLGRDDAVLQKTPFSFDVSVWEFFWPLLAGARLVMARPGGHKDPAYLARTIAERRITTLHFVPSMLEVFLQHPDAAQCTSLRHVVCSGEALPAALAAQARAALPEAGLHNLYGPTEAAVDVTAWTCPRDGVPPVVPIGRPIANTAIYILDALQQPVPQGVAGEIHIGGVQVGRGYLNRPELTAERFPADPFSADPRARMYRTGDLGRWLADGQIEYLGR…	Bacteria	Chitinimonas
collaborator	ChitinimonaskoreensisDSM17726_1	Chitinimide	DOI: 10.1038/s41467-021-24645-0	Thr-Chitinimides-ChitinimonaskoreensisDSM17726-A4	thr	AVQVAAAPEAVALTFEGESLSYGELDRRANRLAHHLRVQGVGPDRLVAVCAERSPEMVVGLLAVLKAGGAYVPLDPAYPAERLAYMLADSRPLAVLSHGPARSALAVALADLPAKPPVFDLDADWRHFPDHAPEIADLAPHHLAYVIYTSGSTGQPKGVMVEQRHVARLFSATRRWFEFGANDVWTLFHSFAFDFSVWEIWGALLHGGKLVIVPRATSRDPEAFYGLLCEHGVTVLNQTPSAFRSLVAAQAGSDARHALRTVIFGGEALDTAQLKPWYRDGRNAGTQLVNMYGITETTVHVTYRPLSEADCDKAGSPIGERIGDLRLYLLDAHGAPVPIGVAGELHVGGAGVARGYLNRPELTAERFVASPFVEGDRLYKTGDLGRYRADGSLEYLGRN…	Bacteria	Chitinimonas
collaborator	ChitinimonaskoreensisDSM17726_1	Chitinimide	DOI: 10.1038/s41467-021-24645-0	Arg-Chitinimide-ChitinimonaskoreensisDSM17726-A5	arg	FEAQAARDPAAVALMLDEARLSYGELNARANRLARHLQAQGVGPDRLVAICLERSFDTVVALLAVLKAGGAYVPLDPAYPAERLAHMLRDSAPAAVLSHGPARAALAAAMAELPAAPPAIDLDADAAAWAGLPATDPAVAGLAPHHLAYVIYTSGTTGAAKGVLVEHGQLAAIAAAWQRVFDLRPGLAHLQMASFSFDVFTADVVRALCFGGRLVLCPRALLLDSAGLLALLQRREIGFADFVPAVLTALMAHLEAGGGSLAGLETLVCGSDAWTPAHARRLRALCGPAVRIVNAYGVTEAAVDSSLYELGRDGLDGLEVLPIGKPLPNARLYLLDGDGAPVPVGVAGEIHVGGAGVARGYLNRPELTAERFIASPFVAGERLYRTGDLGRWLADGNLE…	Bacteria	Chitinimonas
collaborator	ChitinimonaskoreensisDSM17726_1	Chitinimide	DOI: 10.1038/s41467-021-24645-0	Pro-Chitinimides-ChitinimonaskoreensisDSM17726-A6	pro	FAARAAAAPEAIAVLHEGQPLSYGELDRRANRLAHHLLARGIGPDRLVAICAERSAELVIGLAAVLKAGAAYVPLDPAYPADRLAYMLEDSAPALLLTQVHLQGRLPAGAAPVLCLDEEPCGWAAAPAHDPQTMRLPDQLAYVIYTSGSTGRPKGVAQTWRSLDNLIHWQLRDAAAGAAPARVLQFASISFDVSFQEIWSTLCQGGTLVSLAEERRKELGRLRGYLAEHGVRRAFLPAAVLQQLAGLDDGGALPEPCDIVTAGEALQVGDELRGWLRRLPAGRLYNQYGPTETHVVSQHALDCAEADRWPALPPIGRPIANARLYVLDARLEPVPVGVVGELYIAGVGLARGYLARPGLTAEKFLPDPYGAPGARMYRSGDLARRLASGEIDYVGRADR…	Bacteria	Chitinimonas
collaborator	ChitinimonaskoreensisDSM17726_1	Chitinimide	DOI: 10.1038/s41467-021-24645-0	Cys-Chitinimide-ChitinimonaskoreensisDSM17726-A7	cys	FERQAQATPDAVAVLAPRRQLSYAALRREARRLAAQLQARGVRPNQLVAVRMERGWEQVVATLAVLYAGGAYLPLDPALPAERTAHILERAEARLALVQPATAGLAGLPAGVEAIVVEPAAVDGGGEVELQAAEVAGLAPHHLAYVIYTSGSTGLPKGVMIDHRGAVNTLLDINARFAIAPADRVLAVSSLSFDLSVFDFFGTLAAGAAVVLLEPELARDPAHWLELVRAHRVSVWNSVPALLGMLVEYAESGHPLPACLRLAMLSGDWIPLALPQRLRACLPAVRIDSLGGATEASIWSIHYPIGEVDPAWRSIPYGKPLAGQQFHVLDDAMRQRPAWVPGQLYIGGIGLALGYWRDEARTAASFVRHPATGERLYRTGDLGRYLPDGNIEFLGREDG…	Bacteria	Chitinimonas
collaborator	ChitinimonaskoreensisDSM17726_1	Chitinimide	DOI: 10.1038/s41467-021-24645-0	Met-Chitinimides-ChitinimonaskoreensisDSM17726-A8	met	AQAKATPDVLALVCDGERLSYAELNRRANRLAHALRARGAGPDLRIGLHAERSAALVVGLLGILKAGAAYLPLDPSLPAERLAAMVEDAAPALVLSDAAAPPAGWQSLAALAAAGERDDDPADLVQPGNLAYVIYTSGSTGRPKGVAVAHASVANLLDHWLERVGAAPGEAAALWSSFGFDVSVQEILLPLTSGGTLHLVPEAIRTDPAALLDWMRERRIVQGYLPPAFVKWIAEAPEERLAGLALRQLLVGVEPLPEQGLHRMRELLPDLAIVNGYGPTESCVYSSAYLDIRPLARQCPIGRPLANTRIYLLDERLEPVPLGVSGEIHIAGEGLARGYLGRPGATAERFVPDPFGPPGACMYRSGDLARQLPGGDLEYLGRRDHQVKLR	Bacteria	Chitinimonas
collaborator	ChitinimonaskoreensisDSM17726_1	Chitinimide	DOI: 10.1038/s41467-021-24645-0	Ile-Chitinimide-ChitinimonaskoreensisDSM17726-A9	ile	AQIRRTPAAPAVAEAGHTLSYAELDAAATAVARRLRRHGVQPGLAVAVCLPRGRALVCAMLGILRLGAVVVPLDRQSPPVRQRHMLADSASVALIHGGEALDAPEGVLPLDVTALLAPPAAAEAAEPIGPPPAPACSFLFYTSGTTGRPKGVEVRDAGILRLARPGYIDLELAGRFACLSNPAFDALSFEVWVPLLTGGCCVAFADDEVQDPARLAVRLAEEGIDTLFMTVALFNAIVDRAPACFDGVRQLLIGGEQLNAPLIRRWLQRERSGATRLYNVYGPTETTTFALCHPIPPDFDGAVVPIGQPLAATAAILVVDGARLAAQDEVAELYLGGEGLAAGYRNLPDETAHRFVRLGWLDGGHGRYYRSGDLVRRNAAGAIEYVGRADRQVKVR	Bacteria	Chitinimonas
collaborator	ChitinimonaskoreensisDSM17726_1	Chitinimide	DOI: 10.1038/s41467-021-24645-0	Pro-Chitinimides-ChitinimonaskoreensisDSM17726-A10	pro	FGHQARLTPDAPALAWGERRLSYAELDAHAAALAAGLLARLGPAPDDATPRHVALYFEPSPEHVAALLALARLDLTIVPLDPSYPPALLRQILDQVEPACILVPPGDTAALDALDGGRFARHAVALADSPAAVPARPARPRQRPLYTLFTSGSTGRPKGVQVPDRTLCNLLQWQREDGGLAARAATLQFSMLSFDVSFQEIFGTLCGGGCLHLLPPGGRHDLPALLDHLDAAGIERVFMPYVALQLLAEQGASLGRFPAGLREVVTAGEQLLCTDAIRRWFGGLAGARLFNHYGPTETHVVSSLCLAGDPAHWPARPSIGRPIANAWLRVVDEADLPLPPGCPGHLLAGGPMAAPCYLGDAALNAARFVELADAGGQSHTFYRTGDRACFDRDGQLHYL…	Bacteria	Chitinimonas
collaborator	Variovoraxboronicumulans	Variochelin	DOI: 10.1021/acs.jnatprod.5b00932	Arg-Variochelin-Variovoraxboronicumulans-A1	arg	FEAHVRRAPDAIALIAGDTELSYAALDRRANRIAHRLLRHGVRPDTPVAVAVDAPVDRVAGLLAVLKAGGTYLPMDPSHPPQRLSQLLADSGAALLLTGSHSSVNGTVARLAVDDASLDDEPDETPQVTLHDHHLAYVIHTSGTTGRPKGVAVSHGALSMHLQAMADTCGFTASDRSLQFALPHVDAAIEQCLLPLTTGAALVLQPQWCSLASELDALLQRHRVSVVDLPPAYARQLLQDQPPFHHAVRLALFGGEAWAGEDLALVRRVLHPACVVNAYGPTEAVITPTLWSAGAEAIVQGYAPIGRPVGRRTAHVLDADLQPVPQGVPGELYLGGDGLARGYLGRAALTAERFVADPFDPSGGRLYRTGDLVRWRADGQLEYLERLDHQVKVR	Bacteria	Variovorax
collaborator	Variovoraxboronicumulans	Variochelin	DOI: 10.1021/acs.jnatprod.5b00932	Asp-Variochelin-Variovoraxboronicumulans-A2	asp	AHWAAQTPDAPALEPGEQRLSYRELDQRTARVAHWLQGQGVVPGTIVALNLPRALDLPVAILAVWRAGAAYLPLDPDWPEARRAAVLADAQPVFTIDAALPDASTLPEAQDASHIAAPNDLAYVLYTSGSTGTPKGVAVERGQLKNYVAAASAAMQLDTCRRWALTSSVAADLGNTALFGAFHNGACLVVAAPHETKDAEAFARFMRTHAVDALKIVPSHLEALLESAAPCLPRTLVLGGEAAPRALVERIARLAPQCAIYNHYGPTEATVGVMVHAVEPGAPVPEQLPLTRVLANNRVRVLDASRGLVPAGGLGEVYIGGAQLCRGYLNRANADAFVADPFHAGERLYRTGDLAWVLPEGGLRLAGRADHQVKV	Bacteria	Variovorax
collaborator	Variovoraxboronicumulans	Variochelin	DOI: 10.1021/acs.jnatprod.5b00932	Ser-Variochelin-Variovoraxboronicumulans-A3	ser	ETQARERPEAVALVFGDTVLRYGELDARANALAHHLIGRGVRPDMPVGIAAERSLEMVVGLLAILKAGGAYVPIDPELPRERIAYMLEDSGVTLLLTQSHLREALPVAAHVQMLALDALDLSAESTACPQVALHGENLAYVIFTSGSTGRPKGAANRHNALYNRLTWMQDAYALSHGDTVLQKTPFGFDVSVWEFFWPLMQGARLVVAAPGDHREPARLVELIRTHGVTTLHFVPSMLQAFLAHDGIEACTSLRRIVCSGEALPAEAQAKVFERLPGAGLYNLYGPTEAAIDVTHWTCRADGLNHVAIGRPIAGCKTYVLDAGLNPVPSGVGGELYLGGIGLARGYLHRLGLTAERFVADPFSDNGERLYRTGDLVRWRDDGQLAYLGRIDHQVKVR	Bacteria	Variovorax
collaborator	Variovoraxboronicumulans	Variochelin	DOI: 10.1021/acs.jnatprod.5b00932	Pro-Variochelin-Variovoraxboronicumulans-A4	pro	EQQAKANPDALALITAEHRLTYAALNRLANRWAHRLIAQGVRPDMPVAIAVDRSAETVVGLLAVLKAGGAYVPLDPAFPTERLAYMVEDSGASLLLTRRALMPRLPDAASVQRLAFDLDATDDGIADWPDHDPAVPVHGEQLAYVLYTSGSTGRPKGVAMRHDAVARLIAWQLQRLPGAGRTLLFASPCFDVAFQEMVSGLAGGGCLVQTTDAQRLDLDALEALVHGEGVERMFLTFSVLQHFAEQSLTSGRRLPALRQILTAGEQLKRTPALAEWLARESQCRLINQYGPTETHVVSEFVLDGAGDEDLPPIGTPASSACLRVLDANLQPVPVGVAGELCVGAEVLARGYLHRAGLTAQRFVADPFDGHGGRLYRTGDLVRWRGDGQLEYLGRLDHQV…	Bacteria	Variovorax
collaborator	Variovoraxboronicumulans	acetyl	DOI: 10.1021/acs.jnatprod.5b00932	Nδ-acetyl-Nδ-hydroxyornithine-Variochelin-Variovoraxboronicumulans-A5	orn	VERQAALRPEATALIVDGVPMSFRDFDMRANRLAHALIAQGVQPEDRIGLAVERSPEMVVALLGVLKAGAAYVPLDPDYPPDRLDFMAADSGVRLLLTQARVRERLGASMQALPALLLDGGVLDSGPDGAPDVAVHPEHLAYVIYTSGSTGQPKGVAVAHGPLSMHIQTIGRAYGMTPEDRELQFASINFDGAHERIWTPLAFGATLMPRSQELWTVHRSCEEMRRHGITVACFTPGYLQQMADELGEDGRVPTLRSYTVGGEAMGRVACERVMQTLQPPRLINGYGPTETVITPTIAKAYAGTAFDAAYLPIGAPVGDRRAVVLDTDMNLVPPGMAGELYLGGSGLARGYLNRAGLSAERFVADPFDAKGGRLYRTGDLVRWRADGQLEYLGRLDHQV…	Bacteria	Variovorax
collaborator	Variovoraxboronicumulans	acetyl	DOI: 10.1021/acs.jnatprod.5b00932	Nδ-acetyl-Nδ-hydroxyornithine-Variochelin-Variovoraxboronicumulans-A6	orn	ARQAALRPEATALIFGDRTLSYAALEARANRLAHHLVRAGVRPEVRVGLAVRRSADMVVALLAILKAGGAYVPLDPAYPSQRLAYMVEDSGVALLLADDAVVLDRIGLPGVKALTLDTLDLSSGPSHDPGVAVHRDHLAYVIYTSGSTGKPKGVAVAHGPLAMHVQSIGEAYGMTPEDRELQFASINFDGAHERTWVPLAFGAALMPRDEEVWPVERTCAEIARHGITIACFTPGYLHQMAELMGEAASRLPIRSYTVGGEAMPRTSFALVQSVLKPPRIVNGYGPTETVITPMIAKAAPGEGFDAAYMPIGRLVGDRTAYVFDGAMNQVPPGVAGELYLGGDGLARGYLQRAGLSAERFVADPFGAPGGRLYRTGDLVRWEADGQMAYLGRIDHQVKIR	Bacteria	Variovorax
collaborator	BurkholderiathailandensisE264	Bactobolin	DOI: 10.1021/ol200922s	Ala-Bactobolin-BurkholderiathailandensisE264-A1	ala	ERALREQPTRIVAGEPGHAVSARQLSGASNGIARRLAAANVKAGDRVGVRMNRGGALLAALLGIWKIGAAYVPLPTDLPPARRAHIADDAGLAACLHRTAPADPTSHDIVLTDEIFAAPDAEALADIDADPDGIAYLIYTSGSTGVPKGVEVTHRNVASFLRAMAGALPIGRDDRLLATTTIGFDISLLELLLPLTVGAAVIACPEHVRIDAKALERVIDDERITWLQGTPSFFNVLRAGGWRGNKGLNILCGGEPIDASTYDFLRDACASVWQVYGPTEATIWSTIAGPEADGVAGLGEPLRNTTIHLLDAHGQLVPRFSKGEICIGGHGVARGYRNRAALTAERFVHVPGAGRVYRTGDFAFRDSHERLRFLGREDGQVKIR	Bacteria	Burkholderia
collaborator	BurkholderiathailandensisE264	Bactobolin	DOI: 10.1021/ol200922s	Ala-Bactobolin-BurkholderiathailandensisE264-A2	ala	FEQVCRSSPQAVALESGERRLTYAQLHDMVASIGARLAAAGVTPGALLGIFLPRDVRLPAALLASLGSGAVYVPLTEKYPPERLREIIETHGIEHVVTTDALASQLPASCGKIVLPAEGFEKADWLPAAVRPQNAPVYVVFTSGSTGTPKGVLIGERNLGNLIDWYRAAFSAEQRRSVLASTQITFDLSVFELICTLCTGSKVVIVENVLQLLDDGAPCDVSLINTVPSAARELVRHRKFPAAARVVNLAGEALYQDLVDDIYETAPQVEQVFNLYGPSEDTTYSTGHAVPRRAASRTVSIGRSLPGKHAHILADDLTPVAPGEVGEICLSGEGVALGYLNDAKLTAEKFPTIGHGPLAGQRIYRTGDLGSFDGDGLLRYLGRADRQVKVR	Bacteria	Burkholderia
collaborator	Burkholderiagladiolipv.agaricicola	Haereogladin	DOI: 10.1021/acschembio.8b00221	Thr-Haereogladin-Burkholderiagladiolipv.agaricicola-A1	thr	FEAHAAQTPDAVALEFEGRRLSYGELNAWANRVAHHLVGLGVKPDDRVAICVERGPGMIAGLLGVLKAGAGYVPLDPAYPAERLAYTLGDSAPLAVLVQAGTREVLGGXTVPVIDIDAPGESXASSDNPVVEGLNARSLAYVIYTSGSTGQPKGVMIEHRNVTRLFAATQAWYGFGPQDTWALFHSFAFDFSVWEIWGALLHGGRLVIVPKLTSRSPQACYALLCDTGVTVLNQTPSAFRQLIAAQAESDREHELRHVVFGGEALEVGMLRPWYEDARNSSCQLVNMYGITETTVHVTYWPLSAEGGGTPAGIGRPIPDLSVHVLDANLNPVPIGVAGELCVGGAGVARGYLNQPELTARRFIRNPFSEDGESRLYRSGDLARFLPDGTLEYLGRIDTQ…	Bacteria	Burkholderia
collaborator	Burkholderiagladiolipv.agaricicola	Haereogladin	DOI: 10.1021/acschembio.8b00221	Thr-Haereogladin-Burkholderiagladiolipv.agaricicola-A2	thr	FEARTAQTPDAVALEFEGRRLSYGELNAWANRVAHHLVGLGVKPDDRVAICVERGPGMIAGLLGVLKAGAGYVPLDPAYPAERLAYTLGDSAPLAVLVQAGTREVLGELTVPVIDIDAPGESGASSDNPVVEGLNARSLAYVIYTSGSTGQPKGVMIEHRNVTRLFAATQAWYGFGPRDTWALFHSFAFDFSVWEIWGALLHGGRLVIVPKLTSRSPQACYALLCDTGVTVLNQTPSAFRQLIAAQAESDREHELRHVVFGGEALEVGMLRPWYEDARNRDCQLVNMYGITETTVHVTYCPLSAEGGGTPAGIGRPIPDLSVHVLDANLNPVPIGVAGELCVGGAGVARGYLNQPELTARRFIRNPFSEDGESRLYRSGDLARFLPDGTLEYLGRIDTQ…	Bacteria	Burkholderia
collaborator	Burkholderiagladiolipv.agaricicola	Haereogladin	DOI: 10.1021/acschembio.8b00221	Tyr/OH-Tyr-Haereogladin-Burkholderiagladiolipv.agaricicola-A3	tyr	VEQQAARRPDAIAVIDAQERLSYAELNARANRLAHRLRRLGIAPDDRVALCMERGAAIVVAILAVMKAGGAYVPLDPAYPAERLAHMLADSAPVAALTDSRSRARLAGLPAAVPVFELDTQADSWRDEAVDDLPPGEIGLDAGHLAYVIYTSGSTGTPKGVMIEHRGLVNHAMAIIASFEVREDSRVLQFASTSFDASISEVVMALCRGAALYVPADGIRQDRRALWAYLEREAITHATLPPALLQDGEALPPIATRPTLTLAGEAPGAALFRALAGQAVLLNGYGPTEGTVCAAAWRCPPGFDDDTVPIGRPIGNVRLYLLDAHGQPVPVGTPGEIHIGGAGVARGYLNQPALSAARFLRDPFSETPRARMYRSGDLARYQPDGNLVFLGRNDDQVKIR	Bacteria	Burkholderia
collaborator	Burkholderiagladiolipv.agaricicola	Haereogladin	DOI: 10.1021/acschembio.8b00221	Hpg-Haereogladin-Burkholderiagladiolipv.agaricicola-A4	hpg	FEAQAARTPDAPALVDGARSLDYGTLDALANRLARHLAAAGVAAGERVAILLDRSIELILAELAILKCGAVYVPLDRNAPAERQAFMLADCGARCLLSLSGHAAPDLAALQRIDIDAVLAGADAEAQPDAPPPAASAGGDQAAYIMYTSGSTGQPKGVIIAHRGINRLVVNNGYAEFAPSDRIAFTSNPAFDASTMEVWGALLHGACLVVVPHEALLSAPRLAELLQAERVNILHLVAGLLSSHADALAPVFPRLRYLLTGGDAADVRAVQRIMRNGAPQHLVHCYGPTESTTFATTYTLRAGDEPMERLPIGRPISNTRVYLLDRFGEPAPVGVPGELHVGGKGVALGYLNLDALSAERFVRDPFAPAGDSAARMYRTGDLARYLPDGNIEYLGRNDG…	Bacteria	Burkholderia
collaborator	Burkholderiagladiolipv.agaricicola	Haereogladin	DOI: 10.1021/acschembio.8b00221	p-aminobenzoate(PABA)-Haereogladin-Burkholderiagladiolipv.agaricicola-A5	paba	FARQLAERPDAPACVFEGEVASYAELDRLAGRIARALHRRGIGAGTRIALHYPRSTGFVAAILAAFRLGAAYVPIDPGYPAAYVRRTLDDAMPAAIVTTAALAPSFEAGGAPVLRLDVEADLEADLESGEFDAQPPFEAAAIRPDDLAYIAYTSGSTGQPKGVMVEHRQLMNCLQALWERTPYAADEVVAQKTSMSFVPSIKEMLSGLLAGVPQVILPDAVVKDAPAFAAALQAHGVTRLNLVPSHLAVLLEHAGQLGALRHVTTAGEPLSRRLARRFAATLPRARLHNNYGCSELNDISYGEGAELAALHAVAPAGRPIANCRVYLLDERLAPVPVGAVGMLHVEGDPVGPGYWNRPDLTAERFVRHPATGAWLLRTGDLGLWLADGQLLHLGREDFQ…	Bacteria	Burkholderia
collaborator	Burkholderiagladiolipv.agaricicola_1	Burriogladin	DOI: 10.1021/acschembio.8b00221	Thr-Burriogladin-Burkholderiagladiolipv.agaricicola-A1	thr	FEAQAARVPDAIAVVHEDRQLSYGELNARANQLAHRLIGMGVQPDQRVAICAERGLEMLVAVLAVLKAGAGYVPMDPAYPAERLHHMLGDSAPVAILVQGAGREVAASARSVPVIELDESAWAGQPTGNPARADLQPHHLAYVIYTSGSTGLPKGVMVEHRNVPRLFEATAPWFGFDERDVWTLFHSFAFDFSVWEIWGALLHGGRLVVVPAPVSRSPRAFYALLREQGVTILNQTPSAFQQLIAAQGDDAGAHRLRQVIFGGEALEPSMLQPWYARAGNAHTQLVNMYGITETTVHVTYRALGAEDARHGGRSPIGVPIPDLRVHVLDRWGQPVPAGVTGEMYVGGAGVARGYLNRPELSAERFVRDPFSDDPHAWLYRTGDLGRWQPDGTLDYLGRN…	Bacteria	Burkholderia
collaborator	Burkholderiagladiolipv.agaricicola_1	Burriogladin	DOI: 10.1021/acschembio.8b00221	Pro-Burriogladin-Burkholderiagladiolipv.agaricicola-A2	pro	FEAQARRTPEAVAAVFEGRQLSYRELDQRAERLARQLARRGAGRDARVAICVGRSLEMVVGLLGILKSGAAYVPLDPGYPADRLAWMLADSAPLAVLTHAPTAGVAGDTGVPEIAIDIETAPDDAEDQAPPPRAEAADAASLAYVIYTSGSTGRPKGVAMPHRALVNLLHWQASDSQRQGYRGGRTLQFAALGFDVAFQEIFSTLCTGATLELIPESLRFDFARLFEHIRARGIERIYLPYIALQGLAEAVVGSGAALSGCALREVITAGEQLRITDEIRSFFARLKPARLYNHYGPSETHVTIAFSLPEPVEAWSTLPPIGRPIANTRVYLVDEQGRPVPQGVAGEIWIGGAGVARAYLNRPELTAERFLDDPFGGEPRASVYRTGDLGRWLADGSIE…	Bacteria	Burkholderia
collaborator	Burkholderiagladiolipv.agaricicola_1	Burriogladin	DOI: 10.1021/acschembio.8b00221	Gln-Burriogladin-Burkholderiagladiolipv.agaricicola-A3	gln	FEAQVRSTPHATAVCHEAQTLSYAELNARANRLAHRLIEQGIRPDDRVAICVERSLDMVVGLLAILKSGAAYVPVDPGYPAQRLAYMLEDSAPAAILVQAATQGLVGQAPAPVMRIDAEDLDAYPDADPQVAGLDARSLAYVIYTSGSTGQPKGVMVEHRQLVNHMAWMQAAFPLQAGDAVAQKTPFSFDASIWEFHAPLLAGGRLVLARPDGHRDVEYLATWLRTQSIHTLQVVPTLLAALLEANALAGCPTLRRVFCGGEALPPRLVEAFHAQAPGVTLVNLYGPTETTIDATSHVHARGEVRAGSIIGRPIANTRIYILDAQGQPAPIGVAGELAIGGAGVARGYLHRAELTAERFVTDPFSEDPRARMYRSGDLGRWLEDGSVEYLGRNDDQVKIR	Bacteria	Burkholderia
collaborator	Burkholderiagladiolipv.agaricicola_1	Burriogladin	DOI: 10.1021/acschembio.8b00221	Hpg-Burriogladin-Burkholderiagladiolipv.agaricicola-A5	hpg	FEAQARHTPEAIAVIDGETVLDYAALEAKANRLARRLIAAGVQPGQRVVTLLDRSAALVIAQLAILKAGAAYVPIDPRAPAERQAWVMRDCGAPVAVVDTAAGLPEEIAARALPIDDGSGTDEPAANPGLPFDEAAVAYVMYTSGSTGTPKGVLVPHRGVNRLVVNNGYASFHAEDRVAWVGNPAFDISTLEVWAPLLHGGCLVVVPHAAVLQPQQLRALVERHRISVLHLTSGLFSQIAELLGDVLGTLRLLLVGGDAVDPAVVARVLTRHAPRHLLHCYGPTENTTFSTTCELTAADARLPRLPIGRPIANTRAYLLDAHGQPVPTGAIGELYVGGDGVAHGYLDRPELTAERFLADPFAAEPGARMYRTGDLARYLPDGRLEFLGRNDQQVKIR	Bacteria	Burkholderia
collaborator	Burkholderiagladiolipv.agaricicola_1	Burriogladin	DOI: 10.1021/acschembio.8b00221	Phe-Burriogladin-Burkholderiagladiolipv.agaricicola-A6	phe	FEAQVRRAPEALALLHGTQALSYRELNLRANRLAHHLRGLGVKPEDRVAICVERGPEMIVAVLAAWKAGAAYVPLDPAYPAARLAYMLEDSAPAVLLLQAATEARLDTGALRCLRLDQPSPWAEAPAHDPEPLDAIDPAASPLAYVIYTSGSTGQPKGVMVEHRGLANLAAMQARSFEVGPGSRVLQFASFSFDACVFEIVMALCQGAALVLPPAGVVLAGTALREAIEAGGVTHATLPPAVLAALPDEVDFPGVRTLVLAGEALGERLARRWSRARRLVNAYGPTETTIWASWHVCAPDHEGLPPIGRPIDNTAIYILDAHGRPVPLGAVGEIHIGGVGVARGYLNRPALSAERFLDDPFRPGGRMYASGDLGRWRADGGIDYLGRNDFQVKIR	Bacteria	Burkholderia
collaborator	Burkholderiagladiolipv.agaricicola_1	Burriogladin	DOI: 10.1021/acschembio.8b00221	Pro-Burriogladin-Burkholderiagladiolipv.agaricicola-A7	pro	EAQAARTPDAVALAQRSPLDGTERRLSYAQLDQRANALAHELIAQGVRPDDRVAICAERSPAMVVGLLAILKAGAAYVPLDPSYPAERLAAMLADSAPAAVLQQSATASLLDAATAPRIMLDAEAGWAEGRRERPALAGDGANRLAYLIYTSGSTGQPKGVAMANAPLVNLLQWQAGAVTAGRTLQFAALGFDVAFQEIFGTLAAGATLELVDSELRLDFVRLWAHIRARGIERLYLPYIALQALAETAMAAGDAFAPALREVITAGEQLRITPQIATFFARHPGCRLHNHYGPTESHVVVAHTLAGEPAAWPVLPPIGRPVGNVRIYLLDAHGAPVAEGVAGEIHIGGAQLARGYRNLDALSEARFLADPFSGTPGARMYRTGDLGRWRPDGTLDYLG…	Bacteria	Burkholderia
collaborator	BurkholderiaglumaePG1	Haereoglumin	DOI: 10.1021/acschembio.8b00221	Thr-Haereoglumin-BurkholderiaglumaePG1-A1	thr	FEAHAARAPEAVAVECDGQRLGYGELNARANRLAHRLIAAGVKPDDRVAICVERGLGMIVGLLAVLKAGAGYVPLDPAYPAERLAYTLNDSAPLAVLVQGDTRGVPGELSVPVIVIDEAADDLAARADNPDVAGVTSNSLAYVIYTSGSTGQPKGVMIEHRNVTRLFSATEAWFHFGASDAWALFHSFAFDFSVWEIWGALLHGGRLVIVPKLVSRSPQDTYALICEAGVTVLNQTPSAFRQLIAAQAESDRGHQLRNVIFGGEALEVGMLRPWHEDARNADCQLVNMYGITETTVHVTYWPLSATGGNGTPASIGRPIPDLSAYVVDANLNPMPIGVAGELCVGGAGLARGYLNRPELTAQRFVRNPFVDDENARLYRTGDLARFLPDGTLEYLGRID…	Bacteria	Burkholderia
collaborator	BurkholderiaglumaePG1	Haereoglumin	DOI: 10.1021/acschembio.8b00221	Thr-Haereoglumin-BurkholderiaglumaePG1-A2	thr	FEAHAARAPEAVAVECDGQRLGYGELNARANRLAHRLIAAGVKPDDRVAICVERGLGMIVGLLAVLKAGAGYVPLDPAYPAERLAYTLNDSAPLAVLVQGDTRGVPGELSVPVIVIDEAADDLAARADNPDVAGVTSNSLAYVIYTSGSTGQPKGVMIEHRNVTRLFSATEAWFHFGASDAWALFHSFAFDFSVWEIWGALLHGGRLVIVPKLVSRSPQDTYALICEAGVTVLNQTPSAFRQLIAAQAESDRGHQLRNVIFGGEALEVGMLRPWHEDARNADCQLVNMYGITETTVHVTYWPLSATGGNGTPASIGRPIPDLSAYVVDANLNPMPIGVAGELCVGGAGLARGYLNRPELTAQRFVRNPFVDDENARLYRTGDLARFLPDGTLEYLGRID…	Bacteria	Burkholderia
collaborator	BurkholderiaglumaePG1	Haereoglumin	DOI: 10.1021/acschembio.8b00221	Leu-Haereoglumin-BurkholderiaglumaePG1-A3	leu	EAQAAATPHAIALSHDGTTLGYGELNARANRLARRLVALGVRPDARVAVCMERGAELAIALLAVLKAGGAYVPMDPAYPAERLAYLLADSAPVAVLTQAGGADLIAAADAPTLPRIVVNAVDVDTADRDDADAANLDLEGLHAHHLAYVIYTSGSTGQPKGVMVEHRQLDNLIDWHVSRFGLRAGSRTTATAGVAFDASAWELWPALACGATLLLPPAAATGDPQRLLRWWHAQAIDVSFLITPLAELAYSLGYANPHAHTVLIGGDRFKRLSEHVPPHQTVVNNYGPTETTVVATSGAMRHGDAVPHIGRPIANVRVYLLDAHGAPVPIGVAGELHVGGAQVARGYLNREALTAAKFVADPFSTEPGARMYKTGDLARHLPDGHIEYLGRNDDQVKIR	Bacteria	Burkholderia
collaborator	BurkholderiaglumaePG1	Haereoglumin	DOI: 10.1021/acschembio.8b00221	Leu-Haereoglumin-BurkholderiaglumaePG1-A4	leu	FAAQAARTPHAPALVDGPRTLDYATLDARAERLARRLAAAGVAPGERVAILYERSIELIVAELAVLKCGAVYVPLDRNAPADRQAFMLADSGARCLLAPHGLAAPEGTRALRIAVEEAGDADQAAAERGDALAPGRHQEGGDRPAYIMYTSGSTGQPKGVIVAHRGIDRLALNNGYLDFGPGDRVAFTSNPAFDASTMETWGALLNGACLVVVPHEVLLAPPRLAALLAAERVNVLHLVAGLLSSYADALAPVFPTLRYLLTGGDAADVRAVQRIMRHGAPRHLVHCYGPTESTTFATTYTLRAGEPAPERLPIGRPIANTRVYLLDAAGQPVPVGVPGELHVGGAGVALGYLNLEALTAERFVADPFGPAGAAARLYRTGDLARWLPDGNLEYLGRND…	Bacteria	Burkholderia
collaborator	BurkholderiaglumaePG1	Haereoglumin	DOI: 10.1021/acschembio.8b00221	p-aminobenzoate(PABA)-Haereoglumin-BurkholderiaglumaePG1-A5	paba	FARQVALRPDAPACRDGDATASYAELDRRAARIAAALRARGIGPGARVALHHPRSTDFIAALLATFRLGATYVPIDPAYPAAYVRRTLDDAQPAAAVTLASLGDTLAGIVPVVVRLDVEADLAAGGGPDAGAAPEPTHGPAHAPANVPDFATSPDDLAYIAYTSGSTGTPKGVMVEHRQVLNCLQALWTRTPYAAGEVVGQKTSMSFVPSIKEMLSGLLAGTPQVIYPDALVKDAPAFAEALERDGVTRLNLVPSHLAVLLDHAGRLGALRHVTTAGEPLSRRLAMRFAALLPHAKLHNNYGCSEVNDITYCEDSGLAVHHAVVPAGRAIANSRVHLLDAALAPVPVGAVGAIYVEGPGVGPGYWRRPDLTAERFVRHPVSGARLLRTGDIGQWLADGQ…	Bacteria	Burkholderia
collaborator	BurkholderiaglumaePG1	Burrioglumin	DOI: 10.1021/acschembio.8b00221	Thr-Burrioglumin-BurkholderiaglumaePG1-A1	thr	FEAQVERAPDAIAVVHEGERLTYGELNARANRLAHHLIARGVRPDDRVAICVERGLALVVGVLGVLKAGAGYVPMDPAYPAARLSHMLADSAPVAVLVQASSRAALGAHALATVDLDDAALATMPAHNPRLPELGSHHLAYVIYTSGSTGQPKGVMIEHRNVPRLFSATAPWFGFGAQDVWTLFHSFAFDFSVWEIWGALLHGGRLVVVPALVGRSPQAFYRLLCDEGVTVLNQTPSAFQQLIAAQGESGLAHRLRQVVFGGEALEPGMLQPWFARERNAGTQLVNMYGITETTVHVTYRALHADDARRTGRSPIGVPIPDLRLYVLDRHGEPVPVGVPGEMYVGGAGVARGYLNREALTAERFVRDPFNAEPDARMYRTGDLARWLADGTLDYLGRND…	Bacteria	Burkholderia
collaborator	BurkholderiaglumaePG1	Burrioglumin	DOI: 10.1021/acschembio.8b00221	Pro-Burrioglumin-BurkholderiaglumaePG1-A2	pro	FEAQARRTPDAVAVVFGEARLSYRELDERAGRLARLLRRRGARRDARVAICVGRSLEMVVGLLGILKSGAAYVPLDPTYPAERLAYMLTDSTPLAVLVHADTAGVAGTTGTPEIDIDAAIDGVVEEVMPEPEAPAREADADASSLAYVIYTSGSTGQPKGVAMPHRALVNLLHWQATGGRQQGHCGGRTLQFAALGFDVAFQEIFSTLCEGATLELIPEALRFDFEQLFAHIVARRIERLYLPYVALQSLAETVIRRGLDLSDCALREVITAGEQLRITAEIRQLFRRLGARLHNHYGPSETHVTIAFALPEDVEAWATLPPIGRPIANTRVYLLDAHGQPVPHGVVAEIHVGGAQVARGYLNRAGLTAERFVRDPFGDDPHACLYRTGDLGRWREDGS…	Bacteria	Burkholderia
collaborator	BurkholderiaglumaePG1	Burrioglumin	DOI: 10.1021/acschembio.8b00221	Ser-Burrioglumin-BurkholderiaglumaePG1-A3	ser	FEAQAARTPHAPAVVHEGRQLTYAELNAQANRLAHHLIAQGIRPDGRVAICAERSLEMVVGLLAILKSGAGYVPLDPGYPPERLAYLLADSAPQAALAQAATRALLADSSVPVIGLDAPAWHGEADHNPVVDGHGARQLAYVIYTSGSTGQPKGVMNEHHAVVNRLLWMQDAYALQPGEAVLQKTSFSFDVSVWEFFWTLSTGATLVMAKPGGHREPAYLKALIQQHGVTTLHFVPSMLDAFLADGDAGRCTSLTRVVCSGEALPAALVRRFQAQLATARLHNLYGPTEAAVDVTAWTCDEDRASTPIGRPIANTRIYVLDPQGQPVPLGAVGEIHIGGVQVARGYLNREALTAERFVRDPFNDEPDARMYRTGDLGRWLADGTLDYLGRNDDQVKIR	Bacteria	Burkholderia
collaborator	BurkholderiaglumaePG1	Burrioglumin	DOI: 10.1021/acschembio.8b00221	Ala-Burrioglumin-BurkholderiaglumaePG1-A4	ala	FEAQAARTPQAPAVLHDGRQLTYAELNAHANRLAHRLIAHGVRPDDRVAICAERGIAMVAGLLAILKSGAAYVPLDPAYPAQRLAYMLADSAPVAVLAQAATRAVLGAAPSVPLIELPDLLPDALPANDAAEANGAPAGNPVVPGLGARHLAYVIYTSGSTGQPKGVMIEHRNTVNFLCWAHRAFEAREQARTLFSTSLNFDLAVYECFAPLTRGACIEVVPNVLALRERASDAGLVNTVPSALAALLDSGALGAAVRTVNVAGEALRRELVEALFARTGVQRLCNLYGPSETTTYSTWVSMPREQGFAAHIGRPVSNTQIYLLDAHGEPVPPGVAGEIHIGGDGVARGYLNRAGLTAERFVTDPFSDDPRARLYRTGDLGRWRADGNLEYLGRNDHQV…	Bacteria	Burkholderia
collaborator	BurkholderiaglumaePG1	Burrioglumin	DOI: 10.1021/acschembio.8b00221	Phe-Burrioglumin-BurkholderiaglumaePG1-A6	phe	FEAQARRAPDALALVQGERGLSYRELDEQANRLARHLRELGVRPADRVAICVERGIEMIVGVLAVWKAGAAYVPLDPAYPRERLAYMLADSAPAAVLVQAATAERLEAGEARRIRLDRPEAWREASPHDPLPAEAEADAEADADADADADADADADADADADAEPAGPDASPLAYVIYTSGSTGQPKGVMVAHRGLANLAAMQARHLAVDAGSRVLQFASFSFDACVFEIVMALCQGAALVVPPAGVVLAGGALREAIAQGGVTHATLPPAVLAALPDEVTLPGVRTLVVAGEALGERLVRRWAGGRLFVNAYGPTEATIWATWQVCRPDQAGAPPIGRPIDNFAIYLLDTRGRPVPLGATGEIHIGGVGVARGYLNRAALTEQRFRDDPFRPGGRIYA…	Bacteria	Burkholderia
collaborator	BurkholderiaglumaePG1	Burrioglumin	DOI: 10.1021/acschembio.8b00221	Pro-Burrioglumin-BurkholderiaglumaePG1-A7	pro	EAQVRRTPDAPAVAQRSPDDGAERVLSYAQLDEQANALAHHLIARGVRPGDRVAICVHRCPEMVVGLLAILKAGAGYVPLDPSYPPGRLADMLADSAPAALLMQQATAPLLEPGAVPAVLLDAADGWPRAPRDRPEVPGHGPAQLAYLIYTSGSTGQPKGVAMAHGPLVNLLQWQAGAVTAGRTLQFAALGFDVAFQEIFGTLAAGATLELIDADLRLDFARLWAHIRARGVARLYLPYIALQALAEAATAEGAECAPALREVITAGEQLRITPQLTAFFTRHPGCRLHNHYGPTESHVCVAHTLPDDPAAWPALPPIGRPVGNARIYLLDAHGEPVPEGVAGEIHVGGAQVALGYRNRDDLSRARFVPDPFDGAPDARMYRTGDLGRWRADGTLDYLG…	Bacteria	Burkholderia
collaborator	ParaburkholderiamegapolitanaDSM23488	Haereomegapolitanin	DOI: 10.1111/1751-7915.13535	Thr-Haereomegapolitanin-ParaburkholderiamegapolitanaDSM23488-A1	thr	TYAGLNARANRLAHRLIALGVQPDDRVAICVERGLDMIVGLLGILKAGAGYVPLDPAYPVDRLAYTLQDSAPLAVLVQAETRSVLGELSMPVIELGAGASTDQPAHNPAVAGLSARHLAYVIYTSGSTGQPKGVMIEHRNVTRLFAATDAWFGFGAKDVWALFHSFAFDFSVWEIWGALLHGGRLVVVPKLTSRSPHECYALLCTTGVTVLNQTPGAFRQLIAAQAESEGTHRFRHVIFGGEALEVGMLRPWYAEPRNTHTQLVNMYGITETTVHVTYWPLNGAAGTPLCIGQPIPDLSAYVVDEYLNPMPAGVPGELCIGGAGLARGYLNRPELTAQRFIRNPFGEQRDARLYRTGDLARFLPDGKLEYLGRIDSQVKIRGFRIELGEIEAALSALPG…	Bacteria	Paraburkholderia
collaborator	ParaburkholderiamegapolitanaDSM23488	Haereomegapolitanin	DOI: 10.1111/1751-7915.13535	Ser-Haereomegapolitanin-ParaburkholderiamegapolitanaDSM23488-A2	ser	SYRELNERANRLAHHLRTVGIGPDTRVAICVERSVDMMVALLAVLKAGGAYVPLDADYPEERLSFMLEDAAPSAVLTQQAVRQRLGALLDAQAGVPVLELDGTSRPWEQQQTHNLPATQTELKRAHLAYVIYTSGSTGRPKGVMNEHGAVVNRLQWMQQTYGLAVADVVLQKTPFSFDVSVWEFFWPLLAGARIVMASPQGHKDPAYLKSLIQAQRVTTLHFVPSMLEVFLAQGDAGQCESLRRVFCSGEALSGALIRRFKTQLRATPLLNLYGPTEAAVDVTAWTCDEHAPVPSIGKPIANTRVYLLNGAGRPVPVGVAGELHIAGVQVARGYLNRPELTAQRFVDDPFSDVPGARMYKTGDLARYLPDGNIEYLGRNDDQVKIRGFRIELGEIEARL…	Bacteria	Paraburkholderia
collaborator	ParaburkholderiamegapolitanaDSM23488	Haereomegapolitanin	DOI: 10.1111/1751-7915.13535	OH-Leu-Haereomegapolitanin-ParaburkholderiamegapolitanaDSM23488-A3	leu	TYGELNVWANRLAHRLIALGVKPDDRVAICVERSPELIVGLLAILKSGAGYVPMDPGYPAERLAYMLNDSAPAAVLTHARTASLLDAGDVPRIDIDTHDAPTADETATHNPNLATLDTRHLAYVIYTSGSTGQPKGVMVEHRNLGNLVAWHNRAFGVQPGSRSSATAGIAFDGSAWEIWPVLCGGGTLLLPPASTAGDPQSLLRWWHAQKLDVSFLITPLAELAYASGYANPDAHTVLIGGDRLKRWPDAMPEGQSLVNNYGPTENTVVATSGLLQRDDAVLHIGRPIANTRLYILDGQGQPMPIGVAGEIHIGGAQVARGYLNRPELTAERFVHDPFAADPSARMYRTGDLGRWLADGNVEYLGRNDDQVKIRGFRIELGEIETRLSEVAGIREVA	Bacteria	Paraburkholderia
collaborator	ParaburkholderiamegapolitanaDSM23488	Haereomegapolitanin	DOI: 10.1111/1751-7915.13535	Thr-Haereomegapolitanin-ParaburkholderiamegapolitanaDSM23488-A4	thr	SYAALDTQANRAARRLVEEGTVPGDRVAILLDRSIELIVAQLAVLKCGAAYVPLDRNAPADRQAFMLTDCGARRVLTISDFAVPDGTQGTQTRRIDLDTVLLHANARNDNVTAPQLQHAGGDTPAYIMYTSGSTGQPKGVIVAHRGINRLALNNGYADFNAQDRIAFTSNPAFDASTMEVWGALLHGGCLVVVSHADLLAPVQLAALLQKERVSILHLVAGLLSSYADTLAPVFVKLRYLLTGGDAADVRAVQRIMQNSAPRHLVHCYGPTESTTFATTYELRADASPADVLPIGRPISNTRVYLLDAYGEPVPVGVPGELYVGGAGVALGYLNLDSLTAQRFVADPFSSTENARMYRTGDLARYLPDGNIQYLGRNDAQVKIRGFRVEPGEIETKLARY	Bacteria	Paraburkholderia
collaborator	ParaburkholderiamegapolitanaDSM23488	Haereomegapolitanin	DOI: 10.1111/1751-7915.13535	PABA-Haereomegapolitanin-ParaburkholderiamegapolitanaDSM23488-A5	paba	TYAELDQRSDLIAHALRRRGIEPGMRIALYHPRSIDFLGAILAAFKLGCPYVPIDPSYPAAYVRRTLEDAQPAVVVSTSDLAALVAAGDAGPAVLRFDLDLEAEAEAEAEAEAPAPFDAVQSRPEDLAYIAYTSGSTGQPKGVLVEHRQVLNCLHALWERTPFAADEVVGQKTSMSFVPSIKEMLSGLLAGVPQVIFADLVVKDAPVFAAALREHKITRLNLVPSHLAVLLDHADDLGSLRHVTTAGEPLHRRIRQRFAELLPHAKLHNNYGCSELNDISYCEGAGLDGREAVVSAGRPIANCRVHVLDDALQPVPVGTAGALFIEGASVGPGYWNRPDLTAERFVQHPSGGRLLRTGDIGQWLPDGQLLHLGREDFQIKVRGQRVELAAVELALTAHP…	Bacteria	Paraburkholderia
collaborator	BurkholderiagladioliATCC10248	Burriogladiodin	DOI: 10.3390/molecules26030700	Thr-Burriogladiodin-BurkholderiagladioliATCC10248-A1	thr	FEAQAARVPDAIAVLHEDRQLSYGELNARANQLAHRLIGMGVQPDQRVAVCAERGLEMLVAVLAVLKAGAGYVPMDPAYPAERLHHMLGDSAPVVILVQGAGREVAAASARSVPVIELDESAWAGQPTGNPARADLQPHHLAYVIYTSGSTGQPKGVMVEHRNVPRLFEATAPWFGFDERDVWTLFHSFAFDFSVWEIWGALLHGGRLVVVPAPVSRSPRAFYALLREQGVTILNQTPSAFQQLIAAQGDDAGAHRLRQVIFGGEALEPSMLQPWYARAGNAHTQLVNMYGITETTVHVTYRALGAEDARHGGRSPIGVPIPDLRVHVLDRWGQPVPAGVTGEMYVGGAGVARGYLNRPELSAERFVRDPFSDDPHARLYRTGDLGRWQPDGTLDYLGR…	Bacteria	Burkholderia
collaborator	BurkholderiagladioliATCC10248	Burriogladiodin	DOI: 10.3390/molecules26030700	Pro-Burriogladiodin-BurkholderiagladioliATCC10248-A2	pro	FEAQARRTPEAVAAVFEGRQLSYRELDQRAERLARQLARRGAGRDARVAICVGRSLEMVVGLLGILKSGAAYVPLDPGYPADRLAWMLADSAPLAVLTHAPTAGVAGDTGVPEIAIDIETAPDDAEDQAPPPRAEAADAASLAYVIYTSGSTGRPKGVAMPHRALVNLLHWQASDSQRQGYRGGRTLQFAALGFDVAFQEIFSTLCTGATLELIPESLRFDFARLFEHIRARGIERIYLPYIALQGLAEAVVGSGAALSGCALREVITAGEQLRITDEIRSFFARLKPARLYNHYGPSETHVTIAFSLPEPVEAWSTLPPIGRPIANTRVYLVDEQGRPVPQGVAGEIWIGGAGVARAYLNRPELTAERFLDDPFGGEPRASVYRTGDLGRWLADGSIE…	Bacteria	Burkholderia
collaborator	BurkholderiagladioliATCC10248	Burriogladiodin	DOI: 10.3390/molecules26030700	Gln-Burriogladiodin-BurkholderiagladioliATCC10248-A3	gln	FEAQVRSTPHATAVCHEAQTLSYAELNARANRLAHRLIEQGIRPDDRVAICVERSLDMVVGLLAILKSGAAYVPVDPGYPAQRLAYMLEDSAPAAILVQAATQGLVGQAPAPVMRIDAEDLDAYPDADPQVAGLDARSLAYVIYTSGSTGQPKGVMVEHRQLVNHMAWMQAAFPLEAGDAVAQKTPFSFDASIWEFHAPLLAGGRLVLARPDGHRDVEYLATWLRTQSIHTLQVVPTLLAALLEANALAGCPALRRVFCGGEALPPRLVEAFHAQAPGVTLVNLYGPTETTIDASSHVHVRGEVRAGSIIGRPIANTRIYILDARGQPAPIGVAGELAIGGAGVARGYLHRAELTAERFVTDPFSEDPRARMYRSGDLGRWLEDGSVEYLGRNDDQVKIR	Bacteria	Burkholderia
collaborator	BurkholderiagladioliATCC10248	Burriogladiodin	DOI: 10.3390/molecules26030700	Ala-Burriogladiodin-BurkholderiagladioliATCC10248-A4	ala	FEAQAARGPNAVAVEHEGRQLSYGELNARANRVAHRLIALGVQPDQRVAICVERGIEMVVGLLGILKSGAGYVPLDPAYPAQRLHYMLADSAPVAVLAQPSTRALLVGEMPMLDLSSTDVAHEPVDNPVVAGLDARSLAYVIYTSGSTGQPKGVMIEHRNAVNFLHWAHEAFDAREQARTLFSTSLNFDLAVYECFAPLTRGGRIEVVSNILALREREYEVDLVNTVPSALSSLLDSGALSASVRTVNVAGEALRRELVEKLFAETAVARLCNLYGPSETTTYSTWVSMPREQGFAAHIGRPVANTQIHLLDARGALVPVGVAGEICIGGAGVARGYLNRPELTAERFVEDPFSADPQARMYRTGDLGRWLPDGQLEYLSRNDHQVKIR	Bacteria	Burkholderia
collaborator	BurkholderiagladioliATCC10248	Burriogladiodin	DOI: 10.3390/molecules26030700	Phe-Burriogladiodin-BurkholderiagladioliATCC10248-A6	phe	FEAQVRRAPEALALLHGTQTLSYRELNLRANRLAHHLRGLGVKAEDRVAICVERGPEMIVAVLAAWKAGAAYVPLDPAYPAARLAYMLEDSAPAVVLLQAATEARLDTGALRCLRLDQPSPWAEAPAHDPEPLDAIDPAASPLAYVIYTSGSTGQPKGVMVEHRGLANLAAMQARSFEVGPGSRVLQFASFSFDACVFEIVMALCQGAALVLPPAGVVLAGTALREAIEAGGVTHATLPPAVLAALPDEVDFPGVRTLVLAGEALGERLARRWSRARRLVNAYGPTETTIWASWHVCAPDHEGLPPIGRPIDNTAIYILDAHGRPVPLGAVGEIHIGGVGVARGYLNRPALSAERFLDDPFRPGGRMYASGDLGRWRADGGIDYLGRNDFQVKIR	Bacteria	Burkholderia
collaborator	BurkholderiagladioliATCC10248	Burriogladiodin	DOI: 10.3390/molecules26030700	Pro-Burriogladiodin-BurkholderiagladioliATCC10248-A7	pro	EAQAARTPDAVALAQRSPLDGTERRLSYAQLDQRANALAHELIAQGVRPDDRVAICAERSPAMVVGLLAILKAGAAYVPLDPSYPAERLGAMLADSAPAAVLQQSATASLLDAATASLLDAATAPRIMLDAEAGWAEGRRERPALAGDGANRLAYLIYTSGSTGQPKGVAMANAPLVNLLQWQAGAVTAGRTLQFAALGFDVAFQEIFGTLAAGATLELVDSELRLDFVRLWAHIRARGIERLYLPYIALQALAETAMAAGDAFAPALREVVTAGEQLRITPQIAAFFARHPGCRLHNHYGPTESHVVVAHTLAGGPAAWPVLPPIGRPVGNVRIYLLDAHGAPVAEGVAGEIHIGGAQLARGYRNLDALSEARFLADPFADRPGARMYRTGDLGRWRP…	Bacteria	Burkholderia
collaborator	BurkholderiagladioliATCC10248_1	Haereogladiodin	DOI: 10.3390/molecules26030700	Thr-Haereogladiodin-BurkholderiagladioliATCC10248-A1	thr	FEARAAQTPDAVALEFEGQRLSYGELNAWANRVAHRLVGLGVKPDDRVAICVERGPGMIAGLLGVLKAGAGYVPLDPAYPAERLAYTLGDSAPLAVLVQAGTREVLGELTVPVIDIDAPGESGASSDNPVVEGLNARSLAYVIYTSGSTGQPKGVMIEHRNVTRLFAATQAWYGFGPQDTWALFHSFAFDFSVWEIWGALLHGGRLVIVPKLTSRSPQACYALLCDTGVTVLNQTPSAFRQLIAAQAESDREHELRHVVFGGEALEVGMLRPWYEDARNRDCQLVNMYGITETTVHVTYWPLSAEGGGTPAGIGRPIPDLSVHVLDANLNPVPIGVAGELCVGGAGVARGYLNQPELTARRFIRNPFSEDGEARLYRSGDLARFLPDGTLEYLGRIDTQ…	Bacteria	Burkholderia
collaborator	BurkholderiagladioliATCC10248_1	Haereogladiodin	DOI: 10.3390/molecules26030700	Thr-Haereogladiodin-BurkholderiagladioliATCC10248-A2	thr	FEAHAAQTPDAVALEFEGQRLSYGELNAWANRVAHRLVGLGVKPDDRVAICVERGPGMIAGLLGVLKAGAGYVPLDPAYPAERLAYTLGDSAPLAVLVQAGTREVLGELTVPVIDIDAPGESGASSDNPVVEGLNARSLAYVIYTSGSTGQPKGVMIEHRNVTRLFAATQAWYGFGPQDTWALFHSFAFDFSVWEIWGALLHGGRLVIVPKLTSRSPQACYALLCDTGVTVLNQTPSAFRQLIAAQAESDREHELRHVVFGGEALEVGMLRPWYEDARNRDCQLVNMYGITETTVHVTYWPLSAEGGGTPAGIGRPIPDLSVHVLDANLNPVPIGVAGELCVGGAGVARGYLNQPELTARRFIRNPFSEDGESRLYRSGDLARFLPDGTLEYLGRIDTQ…	Bacteria	Burkholderia
collaborator	BurkholderiagladioliATCC10248_1	Haereogladiodin	DOI: 10.3390/molecules26030700	Tyr-Haereogladiodin-BurkholderiagladioliATCC10248-A3	tyr	VEQQAARRPDAIAVIDAQERLSYAELNARANRLAHRLRRLGIAPDDRVALCMERGAAIVVAILAVMKAGGAYVPLDPAYPDERLAHMLADSAPVAALTDSRSRARLAGLPAAVPVLELDTQADSWRDEAGDDLPPGEIGLDAGHLAYVIYTSGSTGTPKGVMIEHRGLVNHAMAIIASFEVREDSRVLQFASTSFDASISEVVMALCRGAALYVPADGIRHDRQALWAYLEREAITHATLPPALLQDGGALPPIATRPTLALVGEAPGAALFRALAGQAELLNGYGPTEGTVCATAWRCPPGFDDKTVPIGRPIGNVRLYLLDAHGQPVPVGTPGEIHIGGAGVARGYLNQPALSAARFLRDPFSETPHARMYRSGDLARYQPDGNLVFLGRNDDQVKIR	Bacteria	Burkholderia
collaborator	BurkholderiagladioliATCC10248_1	Haereogladiodin	DOI: 10.3390/molecules26030700	Leu-Haereogladiodin-BurkholderiagladioliATCC10248-A4	leu	FEAQAARTPDAPALVDGARSLDYGTLDARANLLARHLAAAGVAAGERVAILLDRSIELILAELAILKCGAVYVPLDRNAPAERQAFMLADCGARCLLSLSGHAAPDLAALQRIDIDTVLAGADADRRPEPQPDAPPPAASAGGDQAAYIMYTSGSTGQPKGVIIAHRGINRLVVNNGYAEFAPSDRIAFTSNPAFDASTMEVWGALLHGACLVVVPHEALLSAPRLAELLQAERVNILHLVAGLLSSHADALAPVFPRLRYLLTGGDAADVRAVQRIMRNGAPQHLVHCYGPTESTTFATTYTLRAGDEPMERLPIGRPISNTRVYLLDRLGEPAPVGVPGELHVGGKGVALGYLNLDALSAERFVRDPFAPAGDSSARMYRTGDLARYLPDGNIEYLG…	Bacteria	Burkholderia
collaborator	BurkholderiagladioliATCC10248_1	Haereogladiodin	DOI: 10.3390/molecules26030700	Pro-Haereogladiodin-BurkholderiagladioliATCC10248-A5	pro	FARQLAERPDAPACVFEGEVASYAELDRLAGRIARALHRRGIGAGARIALHYPRSTGFVAAILAAFRLGAAYVPIDPGYPAAYVRRTLDDAMPAAIVTTAVLAPSFEAGGAPVLRLDVEADLEADLESGEFDAQPTFEAAATRPDDLAYIAYTSGSTGQPKGVMVEHRQLMNCLQALWERTPYAADEVVAQKTSMSFVPSIKEMLSGLLAGVPQVILPDAVVKDAPAFAAALQAHGVTRLNLVPSHLAVLLEHAGQLGALRHVTTAGEPLSRRLARRFAATLPRARLHNNYGCSELNDISYGEGAELAALHAVAPAGRPIANCRVHLLDERLAPVPVGAVGMLHVEGDPVGPGYWNRPDLTAERFVRHPATGAWLLRTGDLGLWLADGQLLHLGREDFQ…	Bacteria	Burkholderia
collaborator	BurkholderiaplantariistrainATCC43733	Haereoplantin	DOI: 10.1021/acschembio.0c00558	Thr-Haereoplantin-BurkholderiaplantariistrainATCC43733-A1	thr	FEAHATRAPEAVAVECDGQRLGYGELNARANRLAHRLIAAGVKPDDRVAICVERGLGMIVGLLAVLKAGAGYVPLDPAYPAERLAYTLNDSAPLAVLVQGDTRGVPGELSVPVIVIDEAADDLAARADNPDVAGVTSNSLAYVIYTSGSTGQPKGVMIEHRNVTRLFSATEAWFHFGASDAWALFHSFAFDFSVWEIWGALLHGGRLVIVPKLVSRSPQDTYALICEAGVTVLNQTPSAFRQLIAAQAESDRGHQLRNVIFGGEALEVGMLRPWYEDARNADCQLVNMYGITETTVHVTYWPLSATGGNGTPASIGRPIPDLSAYVVDANLNPMPIGVAGELCVGGAGLARGYLNRPELTAQRFVRNPFVDDENARLYRTGDLARFLPDGTLEYLGRID…	Bacteria	Burkholderia
collaborator	BurkholderiaplantariistrainATCC43733	Haereoplantin	DOI: 10.1021/acschembio.0c00558	Thr-Haereoplantin-BurkholderiaplantariistrainATCC43733-A2	thr	FEAHAARAPEAVAVECDGQRLGYGELNARANRLAHRLIAAGVKPDDRVAICVERGLGMIVGLLAVLKAGAGYVPLDPAYPAERLAYTLNDSAPLAVLVQGDTRGVPGELSVPVIVIDEAADDLAARADNPDVAGVTSNSLAYVIYTSGSTGQPKGVMIEHRNVTRLFSATEAWFHFGASDAWALFHSFAFDFSVWEIWGALLHGGRLVIVPKLVSRSPQDTYALICEAGVTVLNQTPSAFRQLIAAQAESDRGHQLRNVIFGGEALEVGMLRPWYEDARNADCQLVNMYGITETTVHVTYWPLSATGGNGTPASIGRPIPDLSAYVVDANLNPMPIGVAGELCVGGAGLARGYLNRPELTAQRFVRNPFVDDENARLYRTGDLARFLPDGTLEYLGRID…	Bacteria	Burkholderia
collaborator	BurkholderiaplantariistrainATCC43733	Haereoplantin	DOI: 10.1021/acschembio.0c00558	Leu/OH-Leu-Haereoplantin-BurkholderiaplantariistrainATCC43733-A3	leu	EAQAAATPHAIALSHDGTTLGYGELNARANRLARRLVALGVRPDARVAVCMERGAELAIALLAVLKAGGAYVPMDPAYPAERLAYLLADSAPVAVLTQAGGADLIAAADAPTLPRIVVDAADVDTADRDDADAANLDLEGLHAHHLAYVIYTSGSTGQPKGVMVEHRQLDNLIDWHVSRFGLRAGSRTTATAGVAFDASAWELWPALACGATLLLPPAAATGDPQRLLRWWHAQAIDVSFLITPLAELAYSLGYANPHAHTVLIGGDRFKRLSEHVPPHQTVVNNYGPTETTVVATSGAMRHGDAVPHIGRPIANVRVYLLDAHGAPVPIGVAGELHVGGAQVARGYLNREALTAAKFVADPFSTEPGARMYKTGDLARHLPDGHIEYLGRNDDQVKIR	Bacteria	Burkholderia
collaborator	BurkholderiaplantariistrainATCC43733	Haereoplantin	DOI: 10.1021/acschembio.0c00558	PABA-Haereoplantin-BurkholderiaplantariistrainATCC43733-A5	paba	FARQVALRPDAPACRDGDATASYAELDRRAARIAAALRARGIGPGARVALHHPRSTDFIAALLATFRLGATYVPIDPAYPAAYVRRTLDDAQPAAAVTLASLGDTLAGIVPVVVRLDVEADLAAGGGPDAGAAPEPTHGPAHGPAHVPDFATSPDDLAYIAYTSGSTGTPKGVMVEHRQVLNCLQALWTRTPYAAGEVVGQKTSMSFVPSIKEMLSGLLAGTPQVIYPDALVKDAPAFAEALERDGVTRLNLVPSHLAVLLDHAGRLGALRHVTTAGEPLSRRLAMRFAALLPHAKLHNNYGCSEVNDITYCEDSGLAVHHAVVPAGRAIANSRVHLLDAALAPVPVGAVGAIYVEGPGVGPGYWRRPDLTAERFVRHPVSGARLLRTGDIGQWLADGQ…	Bacteria	Burkholderia
collaborator	BurkholderiaplantariiDSM9509	HaereoplantinFGH	DOI: 10.1111/1751-7915.13840	Thr-HaereoplantinFGH-BurkholderiaplantariiDSM9509-A1	thr	EAVAVECDGQRLGYGELNARANRLAHRLIAAGVKPDDRVAICVERGLGMIVGLLAVLKAGAGYVPLDPAYPAERLAYTLNDSAPLAVLVQGDTRGVPGELSVPVIVIDEAADDLAARADNPDVAGVTSNSLAYVIYTSGSTGQPKGVMIEHRNVTRLFSATEAWFHFGASDAWALFHSFAFDFSVWEIWGALLHGGRLVIVPKLVSRSPQDTYALICEAGVTVLNQTPSAFRQLIAAQAESDRGHQLRNVIFGGEALEVGMLRPWYEDARNADCQLVNMYGITETTVHVTYWPLSATGGNGTPASIGRPIPDLSAYVVDANLNPMPIGVAGELCVGGAGLARGYLNRPELTAQRFVRNPFVDDENARLYRTGDLARFLPDGTLEYLGRIDTQVKIRGFR…	Bacteria	Burkholderia
collaborator	BurkholderiaplantariiDSM9509	HaereoplantinFGH	DOI: 10.1111/1751-7915.13840	Thr-HaereoplantinFGH-BurkholderiaplantariiDSM9509-A2	thr	EAVAVECDGQRLGYGELNARANRLAHRLIAAGVKPDDRVAICVERGLGMIVGLLAVLKAGAGYVPLDPAYPAERLAYTLNDSAPLAVLVQGDTRGVPGELSVPVIVIDEAADDLAARADNPDVAGVTSNSLAYVIYTSGSTGQPKGVMIEHRNVTRLFSATEAWFHFGASDAWALFHSFAFDFSVWEIWGALLHGGRLVIVPKLVSRSPQDTYALICEAGVTVLNQTPSAFRQLIAAQAESDRGHQLRNVIFGGEALEVGMLRPWYEDARNADCQLVNMYGITETTVHVTYWPLSATGGNGTPASIGRPIPDLSAYVVDANLNPMPIGVAGELCVGGAGLARGYLNRPELTAQRFVRNPFVDDENARLYRTGDLARFLPDGTLEYLGRIDTQVKIRGFR…	Bacteria	Burkholderia
collaborator	BurkholderiaplantariiDSM9509	HaereoplantinFGH	DOI: 10.1111/1751-7915.13840	Leu/OH-Leu-HaereoplantinFGH-BurkholderiaplantariiDSM9509-A3	leu	HAIALSHDGTTLGYGELNARANRLARRLVALGVRPDARVAVCMERGAELAIALLAVLKAGGAYVPMDPAYPAERLAYLLADSAPVAVLTQAGGADLIAAADAPTLPRIVVDAADVDTADRDDADAANLDLEGLHAHHLAYVIYTSGSTGQPKGVMVEHRQLDNLIDWHVSRFGLRAGSRTTATAGVAFDASAWELWPALACGATLLLPPAAATGDPQRLLRWWHAQAIDVSFLITPLAELAYSLGYANPHAHTVLIGGDRFKRLSEHVPPHQTVVNNYGPTETTVVATSGAMRHGDAVPHIGRPIANVRVYLLDAHGAPVPIGVAGELHVGGAQVARGYLNREALTAAKFVADPFSTEPGARMYKTGDLARHLPDGHIEYLGRNDDQVKIRGFRVEPGE…	Bacteria	Burkholderia
collaborator	BurkholderiaplantariiDSM9509	HaereoplantinFGH	DOI: 10.1111/1751-7915.13840	PABA-HaereoplantinFGH-BurkholderiaplantariiDSM9509-A5	paba	DAPACRDGDATASYAELDRRAARIAAALRARGIGPGARVALHHPRSTDFIAALLATFRLGATYVPIDPAYPAAYVRRTLDDAQPAAAVTLASLGDTLAGIVPVVVRLDVEADLAAGGGPDAGAAPEPTHGPAHGPAHVPDFATSPDDLAYIAYTSGSTGTPKGVMVEHRQVLNCLQALWTRTPYAAGEVVGQKTSMSFVPSIKEMLSGLLAGTPQVIYPDALVKDAPAFAEALERDGVTRLNLVPSHLAVLLDHAGRLGALRHVTTAGEPLSRRLAMRFAALLPHAKLHNNYGCSEVNDITYCEDSGLAVHHAVVPAGRAIANSRVHLLDAALAPVPVGAVGAIYVEGPGVGPGYWRRPDLTAERFVRHPVSGARLLRTGDIGQWLADGQLLHLGREDF…	Bacteria	Burkholderia
collaborator	BurkholderiaplantariistrainATCC43733	Burrioplantin	DOI: 10.1021/acschembio.0c00558	Thr-Burrioplantin-BurkholderiaplantariistrainATCC43733-A1	thr	FEAQVERAPDAIAVVHEGERLTYGELNARANRLAHHLIARGVRPDDRVAICVERGLALVVGVLGVLKAGAGYVPMDPAYPAARLSHMLADSAPVAVLVQASSRAALGAHALATVDLDDAALATMPAHNPRLPELGSHHLAYVIYTSGSTGQPKGVMIEHRNVPRLFSATAPWFEFGAQDVWTLFHSFAFDFSVWEIWGALLHGGRLVVVPALVGRSPQAFYRLLCDEGVTVLNQTPSAFQQLIAAQGESGLAHRLRQVVFGGEALEPGMLQPWFARERNAGTQLVNMYGITETTVHVTYRALHADDARRTGRSPIGVPIPDLRLYVLDRHGEPVPVGVPGEMYVGGAGVARGYLNRESLTAERFVRDPFNDEPDARMYRTGDLGRWLADGTLDYLGRND…	Bacteria	Burkholderia
collaborator	BurkholderiaplantariistrainATCC43733	Burrioplantin	DOI: 10.1021/acschembio.0c00558	Ala-Burrioplantin-BurkholderiaplantariistrainATCC43733-A4	ala	FEAQAARTPHAPAVIHDGRQLTYAELNAHANRLAHRLIAHGVRPDDRVAICAERGIAMVAGLLAILKSGAAYVPLDPAYPAQRLAYMLADSAPVAVLAQAATRAVLGAAPSVPLIELPDSLPDALPDLLPDALPDLLPDALPDLLPDALPTNDAAEANGAPAGNPVVPGLGARHLAYVIYTSGSTGQPKGVMIEHRNTVNFLCWAHRAFEAREQARTLFSTSLNFDLAVYECFAPLTRGACIEVVPNVLALRERASDAGLVNTVPSALAALLDSGALGAAVRTVNVAGEALRRELVEALFARTGVQRLCNLYGPSETTTYSTWVSMPREQGFAAHIGRPVSNTQIYLLDAHGEPVPPGVAGEIHIGGDGVARGYLNRAGLTAERFVTDPFSDDPRARLY…	Bacteria	Burkholderia
collaborator	BurkholderiaplantariistrainATCC43733	Burrioplantin	DOI: 10.1021/acschembio.0c00558	Hpg-Burrioplantin-BurkholderiaplantariistrainATCC43733-A5	hpg	FEAQARRTPGAVAVIDGEATCTYAELDARADRLAQRLVAAGVRPGARVVTVLERGAALVVAQLAILKAGAAYVPIDPQAPAARQAWVMRDCGAPLALVTRACTGLPDEIAAHAMCVDDDDGGRAATTGGIDLSDDGDAVAYVMYTSGSTGTPKGVLVPHRGINRLILGNGYASFGADDRVAWVGNPAFDISTLEVWAPLLNGGCLVVVPHASVLAPQQLRALLLARRVTVLHLTSGLFSQIAGPLGDVLGSLRLLLVGGDAVDPAVVARVLTQHAPRHLLHCYGPTENTTFSTTCEITAADAQLPRLPIGRPIANTRVYLLDAHGQPVPLGAAGELYVGGDGVALGYLDRPDLSAERFLADPFDTAPGARMYRTGDLARYLPDGRLEFLGRNDQQVKIR	Bacteria	Burkholderia
collaborator	BurkholderiaplantariistrainATCC43733	Burrioplantin	DOI: 10.1021/acschembio.0c00558	Phe-Burrioplantin-BurkholderiaplantariistrainATCC43733-A6	phe	FEAQARRAPDALALVQGERGLSYRELDEQANRLARHLRELGVRPADRVAICVERGIEMIVGVLAVWKAGAAYVPLDPAYPRERLAYMLADSAPAAVLVQAATAGRLEAGEARRIRLDRPEAWREASPHDPLPAEAEAEAEPAGPDASPLAYVIYTSGSTGQPKGVMVAHRGLANLAAMQARHLAVDAGSRVLQFASFSFDACVFEIVMALCQGAALVVPPAGVVLAGGALREAIAQGGVTHATLPPAVLAALPDEVTLPGVRTLVVAGEALGERLVRRWAGGRLFVNAYGPTEATIWATWQVCRPDQAGAPPIGRPIDNFAIYLLDTRGRPVPLGATGEIHIGGVGVARGYLNRAALTAQRFRDDPFRPGGRVYASGDLGRWRADGTLDYLGRNDFQVK…	Bacteria	Burkholderia
collaborator	BurkholderiaplantariistrainATCC43733	Burrioplantin	DOI: 10.1021/acschembio.0c00558	Pro-Burrioplantin-BurkholderiaplantariistrainATCC43733-A7	pro	EAQVRRTPDAPAVAQRSPDDGAERVLSYAQLDQQANALAHHLIARGVRPGDRVAICVHRCPEMVVGLLAILKAGAGYVPLDPSYPPGRLADMLADSAPAALLMQQATAPLLEPGAVPAVLLDAADGWPRAPRDRPEVPGHGPAQLAYLIYTSGSTGQPKGVAMAHGPLVNLLQWQAGAVTAGRTLQFAALGFDVAFQEIFGTLAAGATLELIDADLRLDFARLWAHIRARGVARLYLPYIALQALAEAATAEGAECAPALREVITAGEQLRITPQLTAFFTRHPGCRLHNHYGPTESHVCVAHTLPDDPAAWPALPPIGRPVGNARIYLLDAHGEPVPEGVAGEIHVGGAQVALGYRNRDDLSRARFVPDPFDGAPDARMYRTGDLGRWRADGTLDYLG…	Bacteria	Burkholderia
collaborator	Paraburkholderiacaribensis	caribactin	DOI: 10.1016/j.engmic.2023.100106	acyl-haOrn-caribactin-Paraburkholderiacaribensis-A1	orn	RSAPNAPALAAFSPHTVRMSRGELDARASQVAAVLRARGVGAEVRVGVCIDRSCDLFVALLAVLKAGGAFVPLDPRHPAQRLDWMARDAGLRHGIVTRAADATMRARFEHCIEVDAIDSTHALAFDDARVHPRSAAYMIYTSGSTGTPKAVVVEHGPLAAHCDAVIDAYPMTDADRVLHFASVNFDLAHEYWLAPLAAGASIAITPPGTVAPDDARALAEQERVTIAAFPPAYLREFAQAARRHGVPAALRVLAFGGEAMPGDVFADIRQTFSNVRSINGYGPTETVISPMLWPLDASRPFYDPSCASLPIGRPIGLRTARVSTPESADGAPTGDGSTGELLLGGACLARGYHGRAAQTAERFIPDADGAPGSRVYRTGDLARLRADGTYDYMGRIDDQ…	Bacteria	Paraburkholderia
collaborator	Paraburkholderiacaribensis	caribactin	DOI: 10.1016/j.engmic.2023.100106	OH-Asp-caribactin-Paraburkholderiacaribensis-A2	asp	FTHHANATPRQIAVTDAQRQLSFEELDRDSSHAARALIAHGAGAERAVALCIDRSVDFVVALLAILKAGAMAVPLDPVAPRERIEASVAACDARCVIVPANAPQIDSKATVLSLDALIGTRGDAAHVSIAPEQAAYLIYTSGSTGTPKGVVVSHRALADYVQGMLDELKFAPGASMAMVSTVAADLGHTTLFGALCSGRTLHLLPKEAAFDPDRFAATMRERDVGVLKIVPSHLHALLDAQQPADVLPSHALVLGGEPLPWALVERITSLRPACRVINHYGPTEATVGALTFDATANVDNASASAGVPTGRPLPNARACVLDANGAPVPVGGIGELYLGGPGVARGYLGRAAATAERFVPDASGARMYRTGDRVRLRADGAIDYLGRLDDQVKIR	Bacteria	Paraburkholderia
collaborator	Paraburkholderiacaribensis	caribactin	DOI: 10.1016/j.engmic.2023.100106	Ser-caribactin-Paraburkholderiacaribensis-A3	ser	FEGHAAATPDAIALDFIDAKGNRTRVTYAELDDRANRVAAALLKAGVTADSVVALCVERSVDMVVALFGVLKAGAAYLPVDPDYPADRIAYLLDDARPAVVLTQRTLHARVTDAMRSDSARLLCVEELDANAALDRPIAVEPDQLAYLIYTSGSTGKPKGAGNTHRALANRIAWMQEAYRLTPQDVVLHKTPFGFDVSVWEFVWPLSVGATLAVAAPGDHRDPARLASAIATFGVTTLHFVPSMLGAFLGYLKDFDAAARCASIARIVASGEALSPELVARARALLPQAQLHNLYGPTEAAIDVSHWTCTEADARAVAVPIGKPIANIQLHALDASLHPLPAGAIGELYLGGVGLARGYLGRAALTAERFIPDPFTPGARLYRTGDLVCRRADGVLDYL…	Bacteria	Paraburkholderia
collaborator	Paraburkholderiacaribensis	caribactin	DOI: 10.1016/j.engmic.2023.100106	haOrn-caribactin-Paraburkholderiacaribensis-A4	orn	AQHAQNKPDVSAVTDARTTLTRAQLDARAARLAARMMAAGVGAETRVGIAVGRSTDLFVGLLAILKSGGAFVPLDPTHPRERLAHIVDDASIGHVVTERRHVPKLPLRHGTRLWLIDAEDEAVQDEVAWHEPAIAPTQAAYLIYTSGSTGKPKGVVVDHASIAMHCAAIAARYGMREKDRVLHFMSINFDGAHECWLAPLTAGVDIRITDDALWPPAQTCETIANERITIAAFPPSYALQMAEWARAHGAPRSLRSLTVGGEATSREAFAALRQAFPDVRVVNGYGPTETVITPLLWMIEAHEDASDIADAAYLPIGTPVGERTAHVLDASLQPLPTGVTGELYLGGTGVARGYHARAALTAERFVPDPFGPPGARLYRTGDLVRRRTNGVLEFVGRID…	Bacteria	Paraburkholderia
collaborator	Burkholderiacepacia	ornibactin	DOI: 10.1021/ja501597w	acyl-haOrn-ornibactin-Burkholderiacepacia-A1	orn	LKAGGVFVPLDPRHPAARLDWIVQDAQLRHGIVDAAGRAALGAPFEHAFDAAAEAAGGQDLAADDEAVPVHPRSAAYMIYTSGSTGTPKAVVVEHGPLAAHCDALAAALPIEAGDRLLHFASVNFDAAHECWLAPLAIGAGIVVAPPQPFAPDDAHALMVREAVNVAAFPPAYLREFATVAARAGVPPALRVLAFGGEALPQQAFEFVRRTFPSVRLINGYGPTEAVISPMLWPVEPGETPVLAADDAYASLPIGSVIGPRVARVDGGETDGVGELLLGGVCVARGYHGRPALTAERFIPDADGEPGARVYRTGDLARLRDDGTFDYLGRLDDQVQVR	Bacteria	Burkholderia
collaborator	Burkholderiacepacia	ornibactin	DOI: 10.1021/ja501597w	OH-Asp-ornibactin-Burkholderiacepacia-A2	asp	FARQAAAYPHRVALADASASLTFAELDDASNRIARALTQRGVAAEAPVIVCIERSARFVVGLLGALKAGALAVFLDPAQPAARLAAAAADCGARWALVADTAAWPAGIGTQPLDADTLAQDATLAHAAGVRVAPHPEQGAYLIYTSGSTGTPKGVVVSHGALADYVQGMLDELAFAPDASFAMVSTVAADLGHTTLFGALCAGRTLHLLPAACAFDPDLFADEMRRRDVGVLKIVPSHLQALLDARVPADVLPRHALVTGGETLTWALVARLGALAPACRVINHYGPTEATVGAIACDTASIGADARDPASGVPLGQPLPNARALVLDAFGACVPAGATGELYLGGPGVARGYLGRPAQTAERFVPDPFTPGARLYRTGDRVRLCADGRLAFLGRIDDQ…	Bacteria	Burkholderia
collaborator	Burkholderiacepacia	ornibactin	DOI: 10.1021/ja501597w	Ser-ornibactin-Burkholderiacepacia-A3	ser	FADAARATPDAIALEYADIHGGVHRATYRELDAGTSRIAAALRRRGVRPDTPVALCVERSFDMVMALVGVLKAGAAYLPVDPDYPAERIAYLLRDARPAVAITQAHLREQVEAALGEGSDTQLLTVADLLAEEVDDTSASEAAAIDDAQLAYLIYTSGSTGKPKGAGNTHGALANRIAWMQHAYRLTRDDVVLHKTPFGFDVSVWEFVWPLAIGAKLAIAAPGDHRDPARLAAAILAHGVTVLHFVPSMLAAFAAYLDDFPAAAQCDSVRLIVASGEALAPELVAKMARLLPDATLVNLYGPTEAAIDVSHWTCGPDDANAVAVPIGHPIANLQLHVLDAAWQPVPAGATGELYLAGAGLARGYLGRPALTAERFVPDPFVPGARMYRTGDLARRRADG…	Bacteria	Burkholderia
collaborator	Burkholderiacepacia	ornibactin	DOI: 10.1021/ja501597w	hfOrn-ornibactin-Burkholderiacepacia-A4	orn	AHAHARPDARGVADIDRALTRGEVDARAARLARHLAAAGVRPEMRVGVALQRSVDLLVALIAVLKSGAAFVPLDPAHPRERLAQIVGDAGIAHVLTDGASAASLPELPALRVWRADEIDALDEAAHIALPDVLPGHAAYAIYTSGSTGKPKGVIVDHASFALHCAAIAARYGAGEQDVFLLFQSVNFDGAHEGWFSQYMSGAAVSVTADVLWPPAQTCAMMVRDGVTMTYVPPGCAAQLAEWALAHGAPPTLRSLTVGGEATSREAFAMLRRALPDVRVVNGYGPTETVITPTLWMFGPGDDLAKLGDAAYLPIGTLVGARTAHVLDERLHPLPVGVIGELYLGGEGIGVARGYLDRPALTAERFVPDPYGAPGARLYRTGDLVRRRADGVFDFIGRVD…	Bacteria	Burkholderia
collaborator	Burkholderiagladioli	icosalide	DOI: 10.1021/acschembio.8b00600	leu-icosalide-Burkholderiagladioli-A1	leu	SYGELNARANRLARYLVKLGVGPDIPVAVCAERSVAMVVALLAVFKAGGAYLSIDPAYSSARLAHILDDAAPPVMLVDSVGREALGEARLAKHVMVDLSAVLAPWDELASDNLPPRSLGLDSSHLAYVIYTSGSTGTPKGVMVEHRQLANLVTWHIDRFELRAGSRVPATASLAFDASVWELWPVLCAGASLLLPPPGLSSDAAALLNWWRHQSMDCAFLVTPLALLAMQSELPPGLKSLLIGGDRVTSLPSGLPPSLRIVNNYGPTETTVVATSGEIEPSVGDMVYPIGKPIANTRIYLLDENQALVPLGAVGELYIGGAGVARGYLNRPDLTAQRFLADPFARAEGDAEARMYRTGDLARYQPDGNIVFLGRNDEQVKVRGFRVEPGEIEAQLATHE…	Bacteria	Burkholderia
collaborator	Burkholderiagladioli	icosalide	DOI: 10.1021/acschembio.8b00600	Ser-icosalide-Burkholderiagladioli-A2	ser	SYSELDARANRFARYLVGLGVGPDALVAVCLERSTAMVVSLLGILKAGGAYVPIDPAYPGPRIAHIVSDSAPAVVLVDATGREALVDALGDEKLAEYGLIDVGVASAPWDALSSEPLSPNALGLNPRHLAYVIYTSGSTGMPKGVQNEHDALVNRLTWMQEAYRLGGQDVVLQKTPFSFDVSVWEFFWTLANGATLVMAEPGAHRDADYLTEIIAKHGVTTLHFVPSMLAGFLEAQDLTRCKTLSRIICSGEALPAPIARRCLERLPHARLHNLYGPTEAAIDVTAFTCPPDFDAQAVPIGKPIANTRIYLLDEHQAPVPMGAIGELYIGGVGVARGYLNRADLTAQRFLGDPFARAAGHPEARMYRTGDLARYLPDGNIVFLGRNDDQVKLRGFRIEL…	Bacteria	Burkholderia
collaborator	Burkholderiagladioli	icosalide	DOI: 10.1021/acschembio.8b00600	Ser-icosalide-Burkholderiagladioli-A3	ser	SYAELDARANRFARYLVDLGVGPDALVAVCLERSAAMVVSLLGILKAGGAYVPIDPAYPGPRIAHIVSDSAPAVVLVDATGREALVDALGDEKPAEQGLIDVSAASAPWDKLSSDPLSPNALGLNPRHLAYVIYTSGSTGMPKGVQNEHDALVNRLTWMQEAYRLGGQDVVLQKTPFSFDVSVWEFFWTLANGATLVMAEPGAHRDADYLTEIIAKHGVTTLHFVPSMLAGFLEAQDLTRCKTLSRIICSGEALPAPIARRCLERLPHAQLHNLYGPTEAAIDVTAFTCPPDFDAQAVPIGKPIANTRIYLLDERQAPVPLGAIGELYIGGVGVARGYLNRADLTAQRFLADPFARAAGHPEARMYRTGDLARYLPDGNIVFLGRNDDQVKIRGFRIEL…	Bacteria	Burkholderia
collaborator	Burkholderiagladioli	icosalide	DOI: 10.1021/acschembio.8b00600	Leu-icosalide-Burkholderiagladioli-A4	leu	SYGELNARANRLARYLVKLGVGPDISVAVCVERSVAMVVALLAVFKAGGAYLSIDPAYSSARLAHILDDAAPPVMLADAVGREALGEGRLTKHVMVDLSAVLAPWDELASDNLPPRSLGLDSSHLAYVIYTSGSTGTPKGVMVEHRQLANLVTWHIDRFELRVGSRVPATASLAFDASVWELWPVLCAGASLLLPPPGLSSDAAALLNWWRHQSMDCAFLVTPLALLAMQSELPPGLKSLLIGGDRVTLLPSGLPPSLRIVNNYGPTETTVVATSGEIEPSAGDTVYPIGKPIANTRIYLLDENQALVPLGAVGELYIGGAGVARGYLNRPDLTAQRFLADPFARAEGDAEARMYRTGDLARYQPDGNIVFLGRNDEQVKVRGFRVEPGEIEAQLATHE…	Bacteria	Burkholderia
collaborator	Burkholderiapseudomallei	Malleobactin	DOI: 10.1021/ja501597w	acyl-haOrn-Malleobactin-Burkholderiapseudomallei-A1	orn	ARLDPDAPALASFAPDTVRLTRGELDERAARLAAQLRAAGVGAEVPVGVCVARSCDLFVALLAVMKAGGAFVALDPRHPAARLDWVARDAGLAHGIVDASADAAMRARFARCFDVGGVAAADPAAPREHGGDVHPRAAAYMIYTSGSTGTPKAVVVEHGPLAAHGDALAESLPIGPDDRVLHFASVNFDVAIEAWLVPLAVGASVVISDPPPFTPDAAHALISRERVTNTTLPPAYLREFAAVCAREGVPPSLRVLLFGGEAMSQDAFDEIRRVFPAIRLVNGYGPTETVISPMLWPVAPGTTPALDAGNGYASLPIGWPIGRRVARVERADGTVARGEAGELLLGGACLARGYHGRAALTAERFLPDPAGEPGARIYRTGDLARERADGAFDYLGRID…	Bacteria	Burkholderia
collaborator	Burkholderiapseudomallei	Malleobactin	DOI: 10.1021/ja501597w	OH-Asp-Malleobactin-Burkholderiapseudomallei-A2	asp	FAREAAEHPHRVALADADTRLTFAELDDASNRVALALRRDAARDEAPGAETPVAICIERSARFVVAFLGVLKSGAYAVPLDPASPRERIAAALAACGARRMLAAGALDALGEFDGVAVQDIDACAHDASLANAAAPRVPPQPEQAAYLIFTSGSTGAPKGVVVPHRALADYVAGMLDELAFAPHASMAMVSTVAADLGHTALFGALCSGRTLHLLPAQAAFDPDRFAHEMATREVGVLKIVPSHLHALLDAQRAADVLPAHALVTGGEALPWALVERIAALKPDCRVINHYGPTEASVGALVCDTSAPAQADLRAAAASSPGEAARGVPLGRPLPNAHACVLDAYGSSVPVGAIGELYLGGPGLARGYLGRAAASAERFVPHPHVAGARVYRTGDRVRL…	Bacteria	Burkholderia
collaborator	Burkholderiapseudomallei	Malleobactin	DOI: 10.1021/ja501597w	Ser-Malleobactin-Burkholderiapseudomallei-A3	ser	FEAAARARPDAIALECFASSDGGDGARAQMRYGELDAKADRVAAALAASGVRPDSVVALCVERSFDMVVALVGTMKARAAYLPVDPDYPAERIAYLLGDAKPPVVITQAHLRARVDAALAGADAAVVTVDELLARAAGAEPEAERVAAAADVAPGQLAYLIYTSGSTGQPKGAGNTHGALANRIAWMQRAYRLAPDDVVLHKTPFGFDVSVWEFVWPLAVGAKLAIAAPGDHRDPARLVAAIDAHRVTTLHFVPSMLAAFVAYLDDFGAAARCASVRTIVASGEALAPELVARVAALLPHAQLHNLYGPTEAAIDVSHWRCTADDAAADAVPIGHPIANLRLHVLDAALHPAPVGATGELYLGGAGLARGYLGRAALTAERFVPDPFVPGARLYRTGDL…	Bacteria	Burkholderia
collaborator	Burkholderiapseudomallei	Malleobactin	DOI: 10.1021/ja501597w	hfOrn-Malleobactin-Burkholderiapseudomallei-A4	orn	AQHARRRPDARGVADIERALTRGEVDARATRLAKRLVAAGVGAEMRVGVALSRSVDLLVGLIAALKSGGAFVPLDPSHPRERLAQMLEDAQIAHVITERGSVDALPLAGATRAWLVDDAIADAEIDGVALPAVSPHQAAYVIYTSGSTGKPKGVVVDHGAFARHCEAIAARYGATERDVFMLFQSVNFDGAHEGWFSQYMSGAAVAVTADTLWPPARTCALAAREGVTMTYVPPGCATQLAEWALEHGAPPSLRSITVGGEATSREAFALMRRAFPNARVVNGYGPTETVITPMLWMFAPGDDPAKLADAAYLPIGTLVGARTAHVLDARLNPLPVGVIGELYLGGEGVGLARGYLGRAALTAERFVPDPYGAPGARLYRTGDLVRRRADGVFDFIGRI…	Bacteria	Burkholderia
collaborator	Burkholderiapseudomallei	Malleipeptin	DOI: 10.1021/ja504617n	Ser-Malleipeptin-Burkholderiapseudomallei-A1	ser	FEAQVDRKPEAIALTFDGQRLSYAELNARANRLAHYLQARGVGPDRLVALCAERGIEMVVGLLAILKAGGAYVPLDPSHPPERLRRMLDDTNPVAVLVDDIGADALASFESHVAARSPRVHLSRDIAQWRACSPANPPTPRERAARRLAYVIYTSGSSGEPKGVMNEHRGVVNRLWWMQQTYALDERDAVLQKTPFSFDVSVWEFFWPLMSGARLVIAKPEGHKDPAYLSELIDRERVTTLHFVPSMLQAFLEDEGAARGCGSVKRVMCSGEALPPSLVKRFYRCLPDARLHNLYGPTEAAVDVTAWACDAEEGGASVPIGRPIANTRIYVLDGYGQPVPRGVAGELYIGGVQVARGYLNRPELTRERFVDDPFVAGGRLYKTGDLARWRTDGSLEYLG…	Bacteria	Burkholderia
collaborator	Burkholderiapseudomallei	Malleipeptin	DOI: 10.1021/ja504617n	Glu-Malleipeptin-Burkholderiapseudomallei-A2	glu	FEAQVSRTPEAAAVICGDETLSYTDLDARANRLAHYLRGQGVGPDTRVGLALGRGVEMMTGLLAILKAGGAYVPLDPGYASERLRAILDDSRPAIVLADAAGRAALDALAGAPPIADLHADASRWSALPSTPPRVEGLTPRHLAYVIYTSGSTGQPKGVMVEHASVVNLWRALDEAIYRTHPSARRVSLNASIAFDSLVKQWVQLLSGRTLVVVPEPVRFDGRRLLDAIGRDRIDVFDCTPSQLALIEGARGPEDEAYPQVTLVGGEAIGEGMWSELASASSRTYYNVYGPTECTVDATLARIKAEHAPHIGGPLANVRAYVLNERLSPAPVGVRGELYIGGAGVARGYLNRPELTRERFIDDPFVAGGRLYRTGDLARWRTDGRLEYLGRNDFQVKIR	Bacteria	Burkholderia
collaborator	Burkholderiapseudomallei	Malleipeptin	DOI: 10.1021/ja504617n	Ser-Malleipeptin-Burkholderiapseudomallei-A3	ser	FEAQVDRKPEAIALTFDGQRLSYAELNARANRLAHYLQARGVGPDRLVALCAERGIEMVVGLLAILKAGGAYVPLDPSHPPERLRRMLDDTNPVAVLVDDIGADALASFESHVAARSPRVHLSRDIAQWRACNPANPPTPRERAARRLAYVIYTSGSSGEPKGVMNEHRGVVNRLWWMQQTYALDERDAVLQKTPFSFDVSVWEFFWPLMSGARLVIAKPEGHKDPAYLSELIDRERVTTLHFVPSMLQAFLEDEGAARGCGSVKRVMCSGEALPPSLVKRFYRCLPDARLHNLYGPTEAAVDVTAWACDAEEGGASVPIGRPIANTRIYILDGYGQPVPRGVAGELYIGGVQVARGYLNRPELTRERFVDDPFVAGGRLYKTGDLARWRTDGSLEYLG…	Bacteria	Burkholderia
collaborator	Burkholderiapseudomallei	Malleipeptin	DOI: 10.1021/ja504617n	Lys-Malleipeptin-Burkholderiapseudomallei-A4	lys	FERQAARAPDAIAVIQDEHALTYAELNRCANRLAHYLRARGVREDDRVALYARRGPELLIGMLATLKAGGAYVPLDPGYPAERLTHMLLDSAPVVVLRDAAASDDVLVRLNAGTPILDLHADDERWSAQPSGNLKLCGSHEPDVGAQRLAYVIYTSGSTGAPKGVMVEHASVVNQIGALTEYLELDASDRVLQFSNIAFDASVEEIFATLSCGATLVLRTDRWLADAETFWALCGAQRISIVDLPAQFFGQLALSGRRAVPTGVRCVVIGGEAVGASALDAWFAEEGRRPRLFNTYGPTETTVSVTVHEVRGRHDDANVIGRPIANTRVYVLDAWLRPAPIGVAGELYIGGVQVARGYLNRPELTRERFIDDPFVTGGRLYRTGDLARWRTDGSLEYLG…	Bacteria	Burkholderia
collaborator	Burkholderiapseudomallei	Malleipeptin	DOI: 10.1021/ja504617n	Leu-Malleipeptin-Burkholderiapseudomallei-A6	leu	FEAQAARHPDTIALIADGEPVGYAELNRRANRLARHLSARGLQPDQRVAICIDRGIDMVVAMLAVLKAGGAYVPLDPAYPSERLDYLLRDCAPVALLTHARLGASMQTRLVLALARLDTGCALIDLESDAGAWRHERDDDPPPSGLTPRHLAYVIYTSGSTGQPKGVMVEHRSVCNLVAWHAGAFDVGTGCRSASVAGVAFDATTWEVWAALCNGGCLSLAPGDAASDPQALLRWWRAQELDVGFLVTPLAELAYATGQSNAGMRTLLIGGDRLSRWPDSMPPGQMLVNNYGPTEATVVATSGRLQPGEATPPIGRPIANTRVYVLDAWLRPAPIGVAGELYIGGVQVARGYLNRPELTRERFIDDPFVAGGRLYKTGDLARWRTDGSLEYLGRNDFQV…	Bacteria	Burkholderia
collaborator	Burkholderiapseudomallei	Malleipeptin	DOI: 10.1021/ja504617n	Dab-Malleipeptin-Burkholderiapseudomallei-A7	dab	FEAQAARTPNAIAIGDERVTYAALNASANRLARHLRALGVVADTRVAVCIERGAPMVIALLAIWKAGGAYVPLDPAYPRERIAYMLRDSAPIAVLTSRASRDLVASHLPDRAPLVVIDAAACPWDALSGDDLDPNDIELNATHLCYVIYTSGSTGQPKGVMIEHRNLVNYTLDAIRWFGLGPGETVLQQNSLNFDLSLEEIVPALSSGAALAPAVELFGAGGSARGHSARPTMIHLTAAHWQQLVGEWHRAGARPAAALEGVRLVNVTGDALSPHKLEQWDAIRPAHTRLINTYGPTEITISCSAAYVRHAPGMSRVSIGRPFANSRMYLLDARGEPVPVGVTGELYIGGDGVARGYLNRPELSAERFVDDPFRPGSRMYKTGDLACRRGDGEIEFVGR…	Bacteria	Burkholderia
collaborator	Burkholderiapseudomallei	Malleipeptin	DOI: 10.1021/ja504617n	Thr-Malleipeptin-Burkholderiapseudomallei-A8	thr	FEAQVDRKPEAIALTFEGQRLSYAELNARANRLAHYLQARGVGPDRLVALCAERGIEMVVGLLAILKAGGAYVPLDPAYASDRLRGIVQDSQPALVLADAVGRAALGELDGALPVIDLETDALRWREMPATNPEVASQHVHHLAYVIYTSGSTGRPKGVMVEHAQVVRLFGATQAWFGFDERDVWTLFHSYGFDFSVWELWGALLHGGRLVIVPTEVTRTPSAFFALLCAEGVTVLNQTPSAFQALMSAQEEREEAAGNIERANIVAHRLRYVIFGGEALEPRTLASWYARHGERTQLVNMYGITETTVHVTYCALRAEDAMRLGASPIGVRIPDLQLYVLDDRREPVPMGVTGELYVGGAGVARGYLNRPELTRERFIDDPFVAGGRLYKTGDLARWR…	Bacteria	Burkholderia
collaborator	Burkholderiapseudomallei	Malleipeptin	DOI: 10.1021/ja504617n	Thr-Malleipeptin-Burkholderiapseudomallei-A9	thr	FEAQVDRKPEAIALTFEGQRLSYAELNARANRLAHYLQARGVGPDRLVALCAERGIEMVVGLLAILKAGGAYVPLDPAYASDRLRGIVQDSQPALVLADAVGRAALGELDGALPVIDLETDALRWREMPATNPEVASQHVHHLAYVIYTSGSTGRPKGVMVEHAQVVRLFGATQAWFGFDERDVWTLFHSYGFDFSVWELWGALLHGGRLVIVPTEVTRTPSAFFALLCAEGVTVLNQTPSAFQALMSAQEEREEAALKADVDAEAEAAGNIERANVVAHRLRYVIFGGEALEPRTLASWYARHGERTQLVNMYGITETTVHVTYCALRAEDAMRLGASPIGVRIPDLQLYVLDDRREPVPMGVTGELYVGGAGVARGYLNRPELTRERFIDDPFVAGG…	Bacteria	Burkholderia
collaborator	Burkholderiapseudomallei	Malleipeptin	DOI: 10.1021/ja504617n	Glu/hGlu-Malleipeptin-Burkholderiapseudomallei-A10	glu	FEAQVSRTPEAAAVICGDETLSYTDLDARANRLAHYLRGQGVGPDTRVGLALGRGVEMMTGLLAVLKAGGAYVPLDPGYASERLRAILDDSRPAIVLADAAGRTALDALAGAPPIADLQADASRWSALPSTPPRVEGLTPRHLAYVIYTSGSTGQPKGVMVEHASVVNLWRALDEAIYRAHPSARRVSLNASIAFDSLVKQWVQLLSGRTLVVVPEPVRFDGRRLLDAIGRDRIDVFDCTPSQLALIEGARGPEDEAYPQVTLVGGEAIGEGMWSELASVSSRTYYNVYGPTECTVDATLARITAEHAPHIGGPLANVRAYVLNERLSPAPVGVRGELYIGGAGVARGYLNRPELTRERFIDDPFVAGGRLYKTGDLARWRTDGSLEYLGRNDFQVKIR	Bacteria	Burkholderia
collaborator	Burkholderiapseudomallei	Malleipeptin	DOI: 10.1021/ja504617n	Gly-Malleipeptin-Burkholderiapseudomallei-A11	gly	FEAQAARTPEAIAVACGAHALSYAALNRRANRLAHYLRAHGAGPERVVALALERSVDMMVGLLGILKSGSAYLPLDPAYPAERLAYIVDDARPALLLTEAARRDDWRDAGVPVVLLDADGPAIDACPDHNPDAAAGRDARTLSSLAYVIYTSGSTGRPKGVMIEHRNLANLLGAMGEQPGIGAHDVLLAVTSLSFDIAALELFLPLLHGARAVIAARDDAADPARLAHLIESSGASLMQATPSTWRMLAQHGWPRSARPLTLLCGGEALPPALAERLLAHVPAIWNLYGPTETTVWSTVRRVTTPVVDIGGPIANTQVYVLDERLRPAPIGVAGELYIGGAGVARGYLNRPELTRERFVDDPFRRGGRLYRTGDLARRRADGNLEYLGRNDFQVKIR	Bacteria	Burkholderia
collaborator	Ralstoniasolanacearum	Ralsolamycin	DOI: 10.1021/acs.orglett.7b02329	Thr-Ralsolamycin-Ralstoniasolanacearum-A1	thr	FEAQVRRTPEAIAVEHEGWRVSYAELNARANRVAHALIGLGVGPDARVGLCAERSVELVIGLLGILKAGGGYVPLDPSYPRDRLAYMLEDSAPVAVLAQSNTREPLGALSVPVLDLENPLEGEAEHDPQVTGLEPNHLAYVIYTSGSTGQPKGVLVEHRQVARLFTSTQPWFGFGAEDVWTLFHSFAFDFSVWELFGALLHGGRLVVVPKLTARSPQAFYALLCEAGVTVLNQTPSAFRQLMAAQQEAPAARHRLRQVILGGEALEVGALRPWYERAENAGTQLANMYGITETTVHVSYRALEAADAQGTGSPIGRRIPDLRVYVLDAHGEPVPVGVTGEMYIGGAGVARGYLNRPELTAERFVVNPFHGEGRERMYRTGDLGRWLPDGSLEYQGRADA…	Bacteria	Ralstonia
collaborator	Ralstoniasolanacearum	Ralsolamycin	DOI: 10.1021/acs.orglett.7b02329	OH-Tyr-Ralsolamycin-Ralstoniasolanacearum-A2	tyr	FEAQVMRTPDAVALKHADQQVSYRELDARANRLAHHLRELGVAADVLVGLCVDRSIEMIVGLLGILKAGGAYVPLDPDYPQARLAYIFQDAMLSVLVSKRALAQRLPIAWTQVVELDDAEPAWADYPPTPPQVQGEPGQLAYVIYTSGSTGQPKGVAVTHQGVASLVYSQCERFGVSSQSRVLQFASISFDAAVSEIGMGLLCGACLVLAPAQALMPGAALTHLLDRERITHVTLPPAVLALMPEQALPADCHLIVAGEACPPSLVRLWSEGRTMINAYGPTEATVCATMSRALTAQDAPSIGGPIGNVRVYVLDAYLQPVPVGVTGELYIAGSGLARGYWQRAGLTAERFMANPFALGERMYRTGDLGRWLPDGSLEYQGRADAQVKLR	Bacteria	Ralstonia
collaborator	Ralstoniasolanacearum	Ralsolamycin	DOI: 10.1021/acs.orglett.7b02329	Ser-Ralsolamycin-Ralstoniasolanacearum-A3	ser	FEAQVRRTPEAIAVVHEGQQVSYAELNARANRVAHALRRLGVGPDARVGLCAERSVELVVGLLGILKAGGGYVPLDPSYPQDRLTYMLEDSAPVAVLTQSNTREQLGALSVPVLDLDGPLEEAEHDPQVTGLEPHHLAYVIYTSGSTGRPKGVMNEHRGVVNRLWWAQQTYRLDASDRVLQKTPFGFDVSVWELFWPLLAGARLVMARPEGHKDPAYLAATIEQAGITTLHFVPSMLQLFLDQVEAGRCQGLRRMLCSGEALSHALQQRSLARFPHSELHNLYGPTEAAIDVTAWRCNAEIHPGVVPIGRPIANTQMYVLDGHQQPVPLGVTGEIYIGGIGVARGYLNRPELTAERFVVNPFHGEGRERMYRTGDLGRWLPDGSLAYQGRADAQVKLR	Bacteria	Ralstonia
collaborator	Ralstoniasolanacearum	Ralsolamycin	DOI: 10.1021/acs.orglett.7b02329	Homoserine-Ralsolamycin-Ralstoniasolanacearum-A4	ser	FEAQVRRTPEAIAVEHEGQQVSYAELNARANRVAHALRRLGVGPDARVGLCAERSVELVVGLLGILKAGGGYVPLDPSYPQDRLAYMLEDSAPVAVLAQSNTREQLGALSVPVLDLDRPLLEEAEHDPQVTGLEPHHLAYVIYTSGSTGRPKGVMVEHRGLSNLLDWYLEDLGLRSDDTVLLVSSYSFDLTQKNILGPLLAGGRLHLAGPFVPDALVAQIRREGITHINLSPSAFHALIDAAGAEGLGGLRRVVLGGEPIQPARLQGLPEPRPRFINSYGPTECSDVVAWHALDAELDRYRAASVPLGRSVRNVRLYVLDAHRQPVPTGVAGEIYVGGAGVGRGYRNLPELTGACFLADPFHGEGQARMYKTGDLGRWLANGSLEYLGRSDDQVKLR	Bacteria	Ralstonia
collaborator	Ralstoniasolanacearum	Ralsolamycin	DOI: 10.1021/acs.orglett.7b02329	Val-Ralsolamycin-Ralstoniasolanacearum-A5	val	FEAQVVRAPEAIAIEQGERQLSYRALNALANRLAWRLREAGVKPGDRVAILLERSIELVASELAILKCGAVYVPLDCNAPQARLRFLLEDVEAALLLTASGLDVPVLAGLRRLDVDGAAGNSAVDADLPPVPGGEAAAYVLYTSGSTGLPKGVVVPHRAISRLVLNNGYAAFCADDRMAFASNPAFDASTLDVWVPLLNGGRVVIIDQPTVLAPERFAQALRRGQVSVLWMTAGQFHQYAPSLIGVFPQLRYLMVGGDVLDPATIAMVLREGAPQHLLNGYGPTETTTFATTHLIQAVAAGRGIPIGRPIANTQIYVLDAYQQPVPLGVTGEIYVGGAGVGLGYLNRPELTAERFVVNPFHGEGRERMYKTGDLGRWLPDGSLEYQGRTDAQVKLR	Bacteria	Ralstonia
collaborator	Ralstoniasolanacearum	Ralsolamycin	DOI: 10.1021/acs.orglett.7b02329	Ser-Ralsolamycin-Ralstoniasolanacearum-A6	ser	FEAQVRRTPEAIAVEHEGRQVSYAELNARANRVAHALIGLGVGPDARVGLCAGRSVELVVGLLGILKAGGGYVPLDPSYPQDRLTYMLEDSAPVAVLTQGLVREQLGMLSVPVLDLDGPQEDAEHDPQVEALKPHHLAYVIYTSGSTGRPKGVMNEHRGVVNRLWWAQQTYRLDASDRVLQKTPFGFDVSVWELFWPLLAGARLVMARPEGHKAPAYLAATIEQAGITTLHFVPSMLQLFLDQVEAGRCQGLRRMLCSGEALPHALQQRSLARFPHSELHNLYGPTEAAIDVTAWRCNAEIHPGVVPIGRPIANTQIYVLDAYRQPVPLGVTGEIYIGGAGVARGYLNRPELTAERFVVNPFHGEGRERMYRTGDLGRWLPDGSLEYQGRADAQVKLR	Bacteria	Ralstonia
collaborator	Ralstoniasolanacearum	Ralsolamycin	DOI: 10.1021/acs.orglett.7b02329	Gly-Ralsolamycin-Ralstoniasolanacearum-A7	gly	EAQAARTPEAIAVEHGASTLSYRELDSQANRLAHRLIARGVVPDARVGLCVERGLPMVIGVLGILKAGGSYVPLDPSYPRDRLAYMLEDSAPVAVVAQSGTRDRLGDRPVAVVDLDEASWQAEPSHRPEVAGLSSHHAAYVIYTSGSTGRPKGVTVEHRQVVNLLESMRGLLAMTEADRWPAVTTLGFDIAGLELYLPLISGAVVIVLDREVSRNAQSLSAALEGSGATVMQATPSTWRLLLESGWSGRPGLKALCGGEALPGELAGRLRARVGRLWNVYGPTETTIWSSAREVDATDAGQGVVPIGRPIANTQMYVLDAYRQPVPLGVTGEVYIGGAGVARGYLNRPELTAERFVENPFHGEGRERMYRTGDLGRWLPDGSLEYQGRADAQVKLR	Bacteria	Ralstonia
collaborator	Ralstoniasolanacearum	Ralsolamycin	DOI: 10.1021/acs.orglett.7b02329	Ala-Ralsolamycin-Ralstoniasolanacearum-A8	ala	FEAQVRRTPEAIAVVHEGQQVSYAELNARANRVAHALRRLGVGPDARVGLCAERSVELVIGLLGILKAGGGYVPLDPSYPQDRLAYMLEDSAPVAVLAQSNTREQLGALSVPVLDLDGPLEEAEHDPQVTGLEPHHLAYVIYTSGSTGRPKGVVVEHRNTVNFLAWAARAFPPASLARTLFSTSLNFDLSVFECFAPLTTGGRIDIVVNVLALGDGTHDVRLINTVPSALSALLESSGLDPAVEVVNVAGEALKRELVERLFAQTQARRLYNLYGPSETTTYSSWVCMDRQTGFQAHIGRPIANTQIYVLDAYRQPVPLGVTGEIYIGGAGVARGYLNRPELTAERFVVNPFHGEGRERMYRTGDLGRWLPDGSLEYQGRADAQVKLR	Bacteria	Ralstonia
collaborator	Ralstoniasolanacearum	Ralsolamycin	DOI: 10.1021/acs.orglett.7b02329	β-Ala-Ralsolamycin-Ralstoniasolanacearum-A9	ala	FEAQVRRTPEAIAVEHEGRQVSYAELNARANRVAHALIGLGVGPDARVGLCAERSVELVVGLLGILKAGGGYVPLDPSYPQDRLAYMLEDSAPVAVLAQSNTREQLGALSVPVLDLASPLEGEAEHDPQVEALKPHHLAYVIYTSGSTGQPKGVEATIAGLANRLQWFLRDVLTEAPVTALKTSIGFVDAVTETLGTLLAGGSLVVFDNAAVKDLSVFARRLRQTGVSHLVVVPSLLKYLLQSGEPRLDGLRTLVCSGERLAPELARQCLAAYPQVRLLNFYGSSEVNGDATFYRYAGPEHVPAHSVIGRPIANTQIYILDAYGAPVPIGVPGEIHVGGACVARGYLHRPGLTAERFVADPFHGDGRARMYRTGDLGCWQADGNIVYLGRNDHQVKLR	Bacteria	Ralstonia
collaborator	BurkholderiapyrrociniaLyc2	Occidiofungin	DOI: 10.1111/jam.13036	Ser-Occidiofungin-BurkholderiapyrrociniaLyc2-A1	ser	FEQQVERTPDAVAAVCDDASLTYAELNLRANRVAHRLIELGVVPDALVGVAMERSLDMIVALLAILKAGGAYVPVDPDYPAERVRFMIDNAQLRWLLTQQHLLAALPDTDARVIVVDRDTLELDAAPASNPAPALSGDNLAYMIYTSGSTGRPKGALNTHRAITNRILWMQHAYTLGADESVLQKTPFSFDVSVWEFFWPLIVGARLVFARPGGQRETDYLVELIERERITTIHFVPSMLRAFLDHPDLDAHCASLRRVVCSGEALPFDLQQRFFARLDAKLYNLYGPTEAAVDVTAWECRRDDPHRIVPIGRPIANTRLYIVDAQLQPMPVGVAGELLIGGTPVGRGYLGEPELSAEKFIADPFSTDPHARLYRTGDLARYRPDGNVEFLGRIDHQIK…	Bacteria	Burkholderia
collaborator	BurkholderiapyrrociniaLyc2	Occidiofungin	DOI: 10.1111/jam.13036	OH-Tyr-Occidiofungin-BurkholderiapyrrociniaLyc2-A2	tyr	FAQRVAAAPDGIAVVTADASLTYAELDDQASRLASFLLAEYAIERGDVVGVVADRSERWIVGMLGALKAGAVYLPLDPEFPRERLRFMIEDAKVKALLTHSEHLPLLADFWAIPMFALDFQLDTLAPASAAAQVEVRPDDAAYIIYTSGSTGVPKGVVLEHAGLLNMAQYHVDAFGFDAADRFVQFYSPGFDGSIMEIFVTLLAGARLVLAKPAVIRDVPRFVEYIAQQGVTTLNATPAYLAALDWNALGTVKRVISAGDSARAADLRELARTRTCHNSYGPTEATVCVADYVVDPATAYGARLPVGRPIHNTHLYLLDEHGALAPEGCTGEICVSGIALARGYVGRDDLTAAAFVDHPSDAGERLYRTGDLGVWLPDGNLEVTGRRDTQVKIR	Bacteria	Burkholderia
collaborator	BurkholderiapyrrociniaLyc2	Occidiofungin	DOI: 10.1111/jam.13036	DAB-Occidiofungin-BurkholderiapyrrociniaLyc2-A3	dab	EQAAADHPERPAVEYRGNVLSAGELNARANRTARRLLAAAELGPDALVAICMHRSARLMEAILAVWKCGAAYIPIDPDYPVARIRTILEDSGAALVITCDGLLPSELAALAPVVSLDAATDIVDDTNPGRPVSPDSLAYVIYTSGSTGRPKGAMVEHAGMLNHMLAEIDEFSISASSVIAQTAPHCFDISVWQFFTAPLVGGKTVIVDDECIRDPASFVTTLEATRISIVELVPSYLSAVLDRASERPALMRHLRHLLVTGEMVSPALVKQWFDVFPDIALVNAYGPAEASDDVAQHRMTCAPTTPYVPVGKPIRNVRLYVVDPQLNLCPIGIPGELCVSGVAVGRGYLNNEAATREAFIEDPFHPDRGVRLYRTGDIGCYLPDGTIVLHGRKDHQLKIR	Bacteria	Burkholderia
collaborator	BurkholderiapyrrociniaLyc2	Occidiofungin	DOI: 10.1111/jam.13036	Gly-Occidiofungin-BurkholderiapyrrociniaLyc2-A4	gly	EAVAAAHPERIAVRCGTEVRTYRDLVEGADRIAGHLLQTAPIRPDDRIAVWMPRSPLMLETILAIWKCGAAYVPVDPAYPAQRVETILTLARPAIIVGTDCQPPPALASIPLVDPARLPVHRDAAAPTPRCRPADLAYVIFTSGSTGQPKGAMVEHRGMLNHVLAMARRVGLGARSAVAQTASHCSDISVWQCFAALVSGGTTVIYPDAVILEPARLIDNLHRDRITAMQFVPSYLATFLGELERHATPAFPHLETLLTIGETLQPATAQAWFRLNPAVRLINAYGPTEASDSVAHYSMERAPDLPAIPIGRPIENLRVYVVDADMNPCPAGVKGEICIGGVGVGRGYLFDEARTRTVFRDDPFSPEPGARLYRTGDIGCFGPDGNLHFFGRRDFQVKIR	Bacteria	Burkholderia
collaborator	BurkholderiapyrrociniaLyc2	Occidiofungin	DOI: 10.1111/jam.13036	Asn-Occidiofungin-BurkholderiapyrrociniaLyc2-A5	asn	FEAQVARTPAAPALVTDSSLMTYADLNARANSLAHQLRDRYGAGPESLVGVMLDRSEWMIVAILGILKAGAAFVPLDPAYPAERINHILGDTGLSLLVTQSSQLAQWYEFSGATLLLDQELPGWTPLPDNPPRRAEPSQLAYVIYTSGSTGRPKGCLLEHRNLAHYIAWAAGYYFPESTTGSFGLYSSLCFDFTLTNIFCPLVRGKTLRIYPQSESIDTILARMFQPGSGVDTLKLTPTHIHLLEYMNLARSGVRKVIVGGEELTPQHIATLRKIDPAIEIYNEYGPTEATVGCIVERVEDAPSTVLIGRPIANTRVYMLDDALRPVPIGVPGEICIAGDGLARGYHKRPDVTAAKFVEHPFPGEARVYRTGDIGRWLPDGRIQCYGRVDDQVKIR	Bacteria	Burkholderia
collaborator	BurkholderiapyrrociniaLyc2	Occidiofungin	DOI: 10.1111/jam.13036	Ser-Occidiofungin-BurkholderiapyrrociniaLyc2-A6	ser	FEQQVERTPDAVAAVCDDASLTYAELNLRANRLAHRLIELGVVPDALVGVAMERSLDMIVALLAILKAGGAYVPVDPDYPAERVRFMIDNAQLRWLLTQQHLLAALPDTDARVIVVDRDTLELDAAPASNPAPALSGDNLAYMIYTSGSTGRPKGALNTHRAITNRILWMQHAYMLGADESVLQKTPFSFDVSVWEFFWPLSVGARLVFARPGGQRETDYLVELIERERITTIHFVPSMLRAFLDHPDLDAHCASLRRVVCSGEALPFDLQQRFFARLDAKLYNLYGPTEAAVDVTAWECRRDDPHRIVPIGRPIANTRLYIVDAQLQPMPVGVAGELLIGGTPVGRGYHGEPELSAGKFIADPFSTDPHARLYRTGDLARYRPDGNVEFLGRIDHQIK…	Bacteria	Burkholderia
collaborator	ParaburkholderiarhizoxinicaHKI454	Endopyrrole	DOI: 10.1021/acschembio.9b00406	Val-Endopyrrole-ParaburkholderiarhizoxinicaHKI454-A1	val	QRSPALVVGLLAILKAGGAYVPLDPAYPGERLAHILTDAAPSMVLADAVGRAALGEAALAECTVLDPATLPALPDTNPSVAGLTARHLAYVIYTSGSTGTPKGVMVPHHAIARLVINNDFVDICTGDRVAFAANPAFDASTFEVWAPLLNGATVVVIDHDTVLMPAAFAHTLREQRISILWLTVGLFNQMAAQVDMAFSQLKALIVGGDVLDARWVAQVMRESPPEQLINGYGPTESTTFATIYKVTCVPERNASIPIGRPIANTRVYLLDAHSQPVPLGAVGELYIGGAGVARGYWNRPALTAERFVPDPFSEDADARLYKTGDLARYLPDGHLEFVGRNDEQVKIRG	Bacteria	Paraburkholderia
collaborator	ParaburkholderiarhizoxinicaHKI454	Endopyrrole	DOI: 10.1021/acschembio.9b00406	Pro-Endopyrrole-ParaburkholderiarhizoxinicaHKI454-A2	pro	FEAQVERSPDATALVYEEQTLSYAQLNARANRLAHRLIELGVEPDARVAICVERSPAMVVGLLAIVKAGGACVPLDPAYPSERLAHILNDAAPTIVLADATGRATLGEAALACRTVLEPEVLLDQAVPNPRVAELTPRHLAYVIYTSGSTGKPKGVMIEHVQITRLFEVTQSNGTLNEDQALIERQRGYSLTPADRVLQKTPFNFDISIWELFGTLLNGATLVVADADVHKEPVALMDLIARQRITTVYFVPSMLSIFLDTEGVQRCTSVKHLICSGEALPGATAQRCQTLLPDAQVHNLYGPTENALGTTFWTCPAACAENTIPIGRPIVNTRVYLLDTHGQPVPLGAVGELYIGGAGVARGYWNRPELTAERFVRDPFVDEPDARMYKTGDLARYLL…	Bacteria	Paraburkholderia
collaborator	ParaburkholderiarhizoxinicaHKI454	Endopyrrole	DOI: 10.1021/acschembio.9b00406	Val-Endopyrrole-ParaburkholderiarhizoxinicaHKI454-A3	val	FEAQVERTPEAPALVYEAQTLSYAQLNAQANRLAHQLIELGVKPDIRVAICVERSPALVVGLLAILKAGGAYVPLDPAYPGERLAHILTDAAPSMVLADAVGRAALGEAALAECTVLDPATPSTWPDTNPSIAELTARHLAYVIYTSGSTGTPKGVMVPHYAIARLVINNGYVDIRTGDRVAFAANPAFDASTFEVWAPLLNGATVVVIDHDTVLMPAAVCAHVARTAHQHF	Bacteria	Paraburkholderia
collaborator	ParaburkholderiarhizoxinicaHKI454	Endopyrrole	DOI: 10.1021/acschembio.9b00406	Val-Endopyrrole-ParaburkholderiarhizoxinicaHKI454-A4	val	FEAQVERTPEAPALVYEDQTLSYAQLNARANRLAHQLIELGVKPDTRVAICVQRSAALVVGVLAILKAGGAYVPLDPSYPSERLAHILADAAPSMVLADAAGRAALGEAALAECTVLDPATPSTWPDTNPSIAELTARHLAYVIYTSGSTGTPKGVMVPHYAIARLVINNGYVDIRTDDRVAFAANPAFDASTFEVWAPLLNGATVVVIDHDTVLMPRAFAHTLREQRISILWLTVGLFNQMAAQVDTAFSQLKALIVGGDVLDARLVAQVMGESPPEQLINGYGPTESTTFATIYKVTCVPERNASIPIGRPIANTRVYLLDAHGQPVPLGAVGELYIGGAGVARGYWNRPELTAERFVRDPFSEDADARLYKTGDVARYLPDGNLEFVGRNDDQVKI…	Bacteria	Paraburkholderia
collaborator	ParaburkholderiarhizoxinicaHKI454	Endopyrrole	DOI: 10.1021/acschembio.9b00406	Thr-Endopyrrole-ParaburkholderiarhizoxinicaHKI454-A5	thr	FEAQVERTPEAPALVFEDQTFSYAELNAQANRLAHQLIELGVKPDTRVAICVQRSAALVVGLLAILKAGGAYVPLDPAYPGERLAYILADAAPSMVLADAAGRAALGEAALAECTVLDPATLPALPDTNPSVAGLTARHLAYVIYTSGSTGTPKGVMVEHVQVARLFEATQPWYGFNEHDTWCLFHSFAFDFSVWELWGALRYGGKLVIVPHPIARSADAFYQLICEQGVTVLNQTPSAFKALMVSQAHSALTDQLRYVIFGGEALEPTSLQAWYATHDERYPQLINMYGITEVTVHVTYRPLRQQDSEQAGSLIGTRIPDLTIYLLDAHGQPVPLGAVGELYIGGAGVARGYWNRPALTAERFVPDPFSEDADARLYKTGDLARYLLDGHLEFVGRND…	Bacteria	Paraburkholderia
collaborator	ParaburkholderiarhizoxinicaHKI454	Endopyrrole	DOI: 10.1021/acschembio.9b00406	Thr-Endopyrrole-ParaburkholderiarhizoxinicaHKI454-A6	thr	FEAQVERTPEAPALVYEDQTLSYAQLNARANRLAHQLIEWGVRPDTRVAICVQRSAALVVGLLAILKAGGAYVPLDPSYPSERLAHILADAAPSMVLADAVGRAALGEAALAECTVLDPATLPALPGTNPSVAGLTARHLAYVIYTSGSTGTPKGVQNEHQALVNRLVWMQQAYGLTTADRVLQKTPVSFDVSVWEFFWTLLNGATLVVAAPDVHKDPAALIELITRQRITTAHFVPSMLSLFLHNEGVQHCTSVKRLVCSGEALPGASVRLCQTLLPSAQLYNLYGPTEAAIDVTAWSCPANYTEDTVPIGRPIANTRIYLLDAPGQPVPLGAVGELYIGGAGVARGYWNRPALTAERFVPDPFSEDADARLYKTGDLARYLPDGNLEFVGRNDEQVK…	Bacteria	Paraburkholderia
collaborator	ParaburkholderiarhizoxinicaHKI454	Endopyrrole	DOI: 10.1021/acschembio.9b00406	Tyr-Endopyrrole-ParaburkholderiarhizoxinicaHKI454-A7	tyr	FEAQVERTPEAPALVYEAQTLSYAQLNAQANRLAHQLIELGVRPDARVAICVQRSAALVVGVLAILKAGGAYVPLDPAYPGERLAHILVDASPNIVLADAAGRAALGDAALASCTVLDPVTLPALPDTNPSVAGLTARHLAYVIYTSGSTGTPKGVMVEHRGVVNLALAQIACFGVQPTSRILQFASFSFDASASEIWMAFGSGAVLYLPLEAARQDRHALWDYLASHAITHATLPPALLQHGADLSSFGLSLTLILAGEAPSATLVRNLVDQSTVFNAYGPTETTVCATAWRGARDFSGAVPIGRPIANTRIYLLDAHSQPVPLGAVGELYIGGAGVARGYWNRPALTAERFVPDPFSEDADARLYKTGDLARYLPDGNLEFVGRNDEQVKIRG	Bacteria	Paraburkholderia
collaborator	ParaburkholderiarhizoxinicaHKI454	Endopyrrole	DOI: 10.1021/acschembio.9b00406	Tyr-Endopyrrole-ParaburkholderiarhizoxinicaHKI454-A8	tyr	FEAQVERTPEAPALVYEDQTLSYAQLNARANRLAHQLIEWGVRPDTRVAICVQRSAALVVGLLAILKAGGAYVPLDPSYPSERLAHILADAAPSMVLADAVGRAALGEAALAECTVLDPATLPALPGTNPSVAGLTARHLAYVIYTSGSTGTPKGVMVEHRGMVNLALAQIACFGVQPTSRILQFASFSFDASASEIFMAFGSGVALYLPPEAARHDRHALRDYLASHAITHATLPPALLQHGTDLLSFGPSLTLILAGEAPSATLVRDLADQGTVFNAYGPTEATVCATVWRGARDFSGEVPIGRPIGNTRVYLLDAHSQPVPLGAVGELSIGGAGVARGYLNRPELTAERFVPDPFSEDADARLYKTGDVARYRADGNLEFLGRNDDQVKLRG	Bacteria	Paraburkholderia
collaborator	BurkholderiaplantariiDSM9509	Plantaribactin	DOI: 10.1002/anie.201906326	Asp-Plantaribactin-BurkholderiaplantariiDSM9509-A1	asp	FAASAARHAASLAAHCEGQHATYAQLDRHAERVARALAAAGVRHDERVGICMTRSLGMVAALLGTLRSPGAFVPLDPAYPAERLAMMMDDAGVKVVLTDAAARRQCGGLFAGRAAIDVDALEGEGADEASAACAAAALAHEPHPDQLAYVIYTSGSTGRPKGVAISHGAFAAHLDDFITAHGIGADDTQLQSSTINFDVALHEMLPALLQGGRIEMRGAEPWDIDATSRHLIDARVTFSRLPTAYWQQWLRTPPPPQALAALRQITVGGEGLPGDALAQWQRGPLGRIGLANLYGPTETTVACMYRATTLEDAAQSIVSIGVPYASRTARVLDRDGNEAPVGALGELCIGGHTLARGYLDRAAQTAERFVPDPLGAPGSRLYRTGDLCRRRADGAIDFL…	Bacteria	Burkholderia
collaborator	BurkholderiaplantariiDSM9509	Plantaribactin	DOI: 10.1002/anie.201906326	Ser-Plantaribactin-BurkholderiaplantariiDSM9509-A2	ser	FEAAVREHGDALALRCGDASLGYTALDRAANRIARRLADAGVRAGAPVGVCMERSPALIAALFGVLKAGGAYVPLDPAYPRERLRDMCGDARIAIVLTDAATAADHADWIAAEGRVALDAAEVIEAGDAAAEAACGASAEPHPEQLAYLIYTSGSTGRPKGVALTHGALSRHLDDFIADHGLRADDHVLQFSTVNFDASVEQIFAPLTLGASLEMRGTTLWSADEFDRVLAGRAVTFAYLPTGYWKQWVRQARPRPGFVLRRMLIGGEALPGTAVAQWFDSPLREVPLFNTYGPTEIAVTSSVQRVEPAQAGCLAAPIGRPSASRVYRILDRDGLPVPAHGVGELCIGGTTLARAYAGRPELSAERFVPDPLGAPGARLYRTGDRCRWLPDGSVAYLGR…	Bacteria	Burkholderia
collaborator	BurkholderiaplantariiDSM9509	Plantaribactin	DOI: 10.1002/anie.201906326	Ser-Plantaribactin-BurkholderiaplantariiDSM9509-A3	ser	AAQARRTPDAIAVRCDGVLHSYRELDARATRVARQLLASGIGAEARVGVCTARSGAMLVAVLAALKAGAAYVPLDPAYPDAHLGGMIEDAGLACTLADAAGRERLGALGAFGALGDAHRLIDPDDTAAPDAADAADAADPASDADLPAVDPAQLAYVIYTSGSTGRPKGVGVTHGALARFLESLRARLAPTPDDVWLAVTTLSFDIAALELYLPLAAGATIELATRETVVDGTRLAALAESSGATLMQATPMGWRVLLDGGWQGRRGRFTALCGGEALPPDLADALQARGVALWNLYGPTETTIWSSAARLDAGARITLGAPLEHTTLQVLDESGQPVPDNGVGELCIGGANLARGYLGRAGQTAERFIPDPHGAPGARLYRTGDLCRVRRDGRLEYLG…	Bacteria	Burkholderia
collaborator	BurkholderiaplantariiDSM9509	Plantaribactin	DOI: 10.1002/anie.201906326	Orn-Plantaribactin-BurkholderiaplantariiDSM9509-A4	orn	AERAARCPTRVALRCEGAELGYAQLDGWAARIGAALRDDGLVPGERVGLLLNRSLALPAALLGVWHAGGAFVPLDPEYPEARLRAMIADAGVTRVIVDDDTHALWPDLLAPLRAIDAWWLRGEADAGWPGDAEGPAVPLHPEALAYVIYTSGSTGTPKGVAISHGALALHLDDFLHDHRIAETDVVLQSSTINFDVALHELLPALIAGARVVMRGPRAWELDTLNRTLTDERVTFARIPTALWQQWRIALPAPEALALRQITVGGEGLPGDALAKWLDGPLAHVAIDNLYGPTETTVAALHHPVGPADAASAVVAIGRCYPSRHAYVADLDGNRAPDGALGELCIGGATLAHGYLGRPELTAERFVPDPTGAPGSRVYRSGDLCRARPDGTIDFLGRLD…	Bacteria	Burkholderia
collaborator	BurkholderiaplantariiDSM9509	Plantaribactin	DOI: 10.1002/anie.201906326	Gra-Plantaribactin-BurkholderiaplantariiDSM9509-A5	gra	ASVAHDGARLALRDGARTMSYAELDAAADALAARLVTLGIGTEARVAVLAERSIEHVLAMLAALKAGATWLPLDPRAPAARLSAQLADSGAAVLLHAVPLPDGVEPAAAVPLAFRHETPAAVCAPRVSPPLRHADRAAYMIYTSGSTGEPKGVVVTHRALANYVRGMLATLDAPADASFAMVSTPAADLGHTTLFGALASGRTLHLIAPDLVFQPDAFARYMAAHRIGVLKIVPSHLAALLSAARPEQVLPAAALIVGGERTPAALLARITVLAPACRVFNHYGPTETTVGVAMHAWPADAAPTRDLPLGRALPGMRIHLLDANLARVADGEDGELYVGGPGVARGYHGRAGLTAERFVPDPFLAGERLYRTGDLGRIGADGLLEYRGRADDQVKVR	Bacteria	Burkholderia
collaborator	BurkholderiaplantariiDSM9509	Plantaribactin	DOI: 10.1002/anie.201906326	Gln-Plantaribactin-BurkholderiaplantariiDSM9509-A6	gln	FERHAAAYPDDEALVFGDTTLTYAELNARANRLAHWLRSRGVGVESRVGISAERSLELVIALYAIMKAGAAYVPLDPSYPADRIAAMIDDSGIGLLLAQRDIDLPSRDGVERVDLDTLDLSDTSTLSADNPDVKLDGANLAYVIFTSGSTGRPKGVGNRHDGLSNRLVWMQREYGLRRGETVLQKTPFSFDVSVWEFFWPLMVGARLAIAAPGAHRDPAELAKTIVAHRVTTLHFVPSMLQAFVASEAEATSCGTTLKRIVCSGEALPADLRERVANVLPGVGLFNLYGPTEAAIDVTAWTCVDEAGRAVPIGRPIASTQTWVLDARLNPVPPGVPGELYLGGAGLARGYLGRPDLTAERFVPDPFATVPGARLYRTGDLARWRTDGALDYLGRVDHQV…	Bacteria	Burkholderia
collaborator	BurkholderiaplantariiDSM9509	Plantaribactin	DOI: 10.1002/anie.201906326	Gly-Plantaribactin-BurkholderiaplantariiDSM9509-A7	gly	FERHAAAHPDDEALVFGDTTLTYAELNARANRLAHWLRARGVGVESRVGIAAERSLELVIALYAIMKAGAAYVPLDPSYPADRIAAMIDDSGIGLLLAQRDIDLPSRDGVERVDLDTLDLSDTSTLSADNPDVKLDGANLAYVIFTSGSTGRPKGVGNRHDGLSNRLVWMQREYGLRRGETVLQKTPFSFDVSVWEFFWPLMVGARLAIAAPGAHRDPAELARTIVAHRVTTLHFVPSMLQAFVASEAEAAACGTTLKRIVCSGEALPADLRERVANVLPGVGLFNLYGPTEAAIDVTAWTCVDEAGRAVPIGRPIASTQTWVLDARLNPVPPGVPGELYLGGAGLARGYLGRPDLTAERFVPDPFATVPGARLYRTGDLARWRTDGALDYLGRVDHQV…	Bacteria	Burkholderia
collaborator	BurkholderiaplantariiDSM9509	Plantaribactin	DOI: 10.1002/anie.201906326	Gra-Plantaribactin-BurkholderiaplantariiDSM9509-A8	gra	AAQAARRPEAVALVHGGDSLDYGTLEARANRVAHALRAAGVGPDVRVGIAIERSLGMIVAILGVLKAGGAYVPLDPSYPAERLTMMIEDSGIVLALTERAGATDRERVPVATLDLADLAAEDSGYASTVPPDAVEAGHLAYLIYTSGSTGRPKGVGITHDALARHTEVSIAMFGIGETDRVLQFSTFNFDGFVEQVFPTLAAGATLIVRGPELWSTARFADEVARERITVADLTTAYWNALAQDFAARPETRAALATLRRVHAGGEAMPADGVRAWRAAGLAGVALANTYGPSEATVTATLFDCGALAASGADVPAQIPLGGPLPGRTLVVLDAQGNLAPLGAAGELCIGGPLLARGYHDRPELTAERFVADPFAALPGARLYRTGDIVRWHEDGTLAY…	Bacteria	Burkholderia
collaborator	ParaburkholderiagraminisC4D1M	Gramibactin	DOI: 10.1038/s41589-018-0101-9	Asp-Gramibactin-ParaburkholderiagraminisC4D1M-A1	asp	ERADAVALVDSDGPLSWHDLWAWSGRLAAALSDHGVRPGDHVVLALPRCSALVAAILAVWRLRACYVPLDPASPQARLRWQAEDCGARVVVMGGALGVVGDAKPAANASTNLFTTAATNSGANAALKSAAPSWLPDGIATLNPHTLRDATNSAALAAHLGDAAANPQRTDGILVWPAYVIYTSGSTGRPKGVVQSHAALAAYLRGVSERLPGDIASAAYLSTPAADLGHTSLFGALWHGWTLHLIDADIAADPDAFATYMHTHSVELLKIVPSHLDALLQAQLPERVLPRRCLVMGGEPAPTRLAERIEALRPECRLINHYGPTETAVGVLTRSGAQSRAATLPLGQPLAHVDARIVDADGNAVPKGAAGELCIGGASVAYGYLNRPSLTAERFVPDPD…	Bacteria	Paraburkholderia
collaborator	ParaburkholderiagraminisC4D1M	Gramibactin	DOI: 10.1038/s41589-018-0101-9	Thr-Gramibactin-ParaburkholderiagraminisC4D1M-A2	thr	AQAHARPDAVALVDGDEEVTYAQLDAWSGAIAQELIRLGAGAEVRVGVAMQRSTALVASLLGVLRAGAAYVPLDPSYPAERLAHIVDDSQLRLIVTDAPSLAQHAALFGTRPTLDAVALRETLPNDEPLDVAMYPRPQQLAYVIYTSGSTGTPKGVGITHENIARLFDATQSRFAFDSSDVWTLFHSYAFDFSVWEIFGALVHGARLVIVPHWSAREPAAFHTLLREQRVTVLNQTPSAFMQLTHADDDNTLQSLRVVIFGGERLEPASLARWADGARRKGVLPTLVNMYGITETTVHVTHRALDDAGLRDARSMIGAPLDDLTLHVLDADMNRVPVGAVGELYVGGAGLARGYAGRAELTAQRFVPDPYGAPGARLYRSGDLARRLPDGDLEYLGRND…	Bacteria	Paraburkholderia
collaborator	ParaburkholderiagraminisC4D1M	Gramibactin	DOI: 10.1038/s41589-018-0101-9	Thr-Gramibactin-ParaburkholderiagraminisC4D1M-A3	thr	AQTRARPDAVALIDGDEEVTYAQLDAWSGAIARELIRLGAGTEVRVGVAMQRSAALVASLLGVLRAGAAYVPLDPSYPAERLAHIVDDSQLRLIVTDAPSLAQHAALFGTRPTLDALALRDTLPNDEPLDVAMYPRPQQLAYVIYTSGSTGVPKGVGITHENIARLFDATQSRFAFDSSDVWTLFHSYAFDFSVWEIFGALVHGARLVIVPHWSAREPAAFHALLRKERVTVLNQTPSAFMQLTHADDDNTLQSLRVVIFGGERLEPASLARWADGARRKGVLPSLMNMYGITETTVHVTHRTLDYAALHDARSVIGAPLDDLTLHVLDADMNRVPVGAVGELYVGGAGLARGYAGRAELTAQRFVPDPYGAPGARLYRSGDLARRLPDGDLEYLGRND…	Bacteria	Paraburkholderia
collaborator	ParaburkholderiagraminisC4D1M	Gramibactin	DOI: 10.1038/s41589-018-0101-9	Gra-Gramibactin-ParaburkholderiagraminisC4D1M-A4	gra	AAQAKRTPQAIALRCEDESLTYAELDAWSAAIASRLIARGVGAERRVGLCVARGPALIAALLGIVRSGGAFVPLDPDYPAARLAQMIGDAGIVQVVADAASAARVAEVLAECEVLDVGSQSLMEPESANHTDIALHPDQLAYVLYTSGSTGRPKGVGVSHGALWTHLRDFLTTYGISSDDTVLHSSTINFDVALHETLPALLRGATVEMRGMQPWDLQSLSERLVKRQVTFARIPTALWQQWHRHAPPRAQLALRQVTVGGEALPGDALARWRDGPLADIRLDNLYGPTETTVAALYRHTVADDVHEVTVPIGHPYPGRTARVFDAFGDEAPVGGLGELCIGGPTVARGYLGRAGLTAERFVPDPHGAPGARMYRSGDLCRMRADGTVEFLGRLDQQVK…	Bacteria	Paraburkholderia
collaborator	ParaburkholderiagraminisC4D1M	Gramibactin	DOI: 10.1038/s41589-018-0101-9	Gly-Gramibactin-ParaburkholderiagraminisC4D1M-A5	gly	EAARVPQRVAVRQNGKAFDYATLARWSVAIDARLRVSGVAREERVAVCMRRSPALIASMLGVWRSGAAYVPLDPSFPAERLAGMLEDAGVARVIADEEGRARLGGALDNRIVLDAGSGEDALVHDAASALPPISPSTDSQLAYVIYTSGSTGRPKGVAVSHGALARLLASIGIAPGLHKDDVLLSVTTPSFDISLLEFCLPLTRGACVEMADAQTVADGMALARLIDESGATFMQATPSGWRLLIESGWQGASRGRLTGIAGGEPLPADLAAQLAQRGVELWNLYGPTETTIWSSCARVSGSGPITIGRALHANALRIVDASGQLTLQGGVGELCIGGENLARGYLGRAGLTAERFVPDPYGAPGARMYRTGDLCRERTDGEFECLGRIDQQVKLR	Bacteria	Paraburkholderia
collaborator	ParaburkholderiagraminisC4D1M	Gramibactin	DOI: 10.1038/s41589-018-0101-9	Gra-Gramibactin-ParaburkholderiagraminisC4D1M-A6	gra	AAQAKRTPQAIALRCEDESLTYAELDAWSAAVAARLVARGVGAERRVGLCVARGPALIAALLGIIRSGGAFVPLDPDYPAARLAQMIGDAGIVQVVADAASAARVAEVLAGCEVVEVGAMAVAAAAAEAHAKAQSQSQSNVASAAPRTGAARESLMGTETPQHSDAETMISTATEQESKPHTDIALHPDQLAYVLYTSGSTGRPKGVGVSHGALWTHLQDFLTTYGISDDDTVLHSSTINFDVALHETLPALLRGATVEMRGVQPWDLQSLSERLVKRRVTFARIPTALWQQWHRHAPPRAQLALRQVTVGGEALPGDALARWCDGPLADIRLDNLYGPTETTVAALCRRTVAADVHDVTVPIGHPYPGRTARVLDAFGDEAPVGGLGELCIGGPTVAR…	Bacteria	Paraburkholderia
collaborator	ParaburkholderiamegapolitanaLMG23650	MegapolibactinA	DOI: 10.1002/anie.201906326	Gly-MegapolibactinA-ParaburkholderiamegapolitanaLMG23650-A1	gly	FEARVAEAPDAIALGHEGRHLTYAELNAQANRIAHKLIARGVQPDSRVAICVERSPTMVAALLGILKAGAAYVPLDPAYPAERLAYTLRDSAPVAVLVQRDTRDLLGEQAVPAIDLDADISGDAPTHNPVVPGLTAEHLAYVIYTSGSTGQPKGVMVEHRNVANLLHSMRQALRPEVPARMVALTTLAFDIAGLELFLPLVSGTQIVLLDRATALDPFALDTAIRESGATIMQATPATWRMLLDSGWSGAPELKALCGGEALPGELAQRLLPKVASLWNVYGPTETTIWSTSALVNSRHVDTHASAPIGRPIANTQIYVLDGAGQQVPVGVSGELYIGGAGVARGYFNRDDLTAERFLMDPFSDAPGARMYRTGDLARFLPDGNIEYLGRNDHQVKLR	Bacteria	Paraburkholderia
collaborator	ParaburkholderiamegapolitanaLMG23650	MegapolibactinA	DOI: 10.1002/anie.201906326	Asp-MegapolibactinA-ParaburkholderiamegapolitanaLMG23650-A2	asp	AVQTPATTALVDTDGTLDWATLWAWSGRLAAALADAGTQSGERVALALPRSAALVASILAVWRVRACYVPLDPALPTARLRWQAEDCGARTVIASDASVAGWLPDGVRTLDPAATRESQSDATHTFAADAADERAFAWPAYVIYTSGSSGRPKGVVLSHRALSAYLQGVSERLPEGIRSAAYLSTPAADLGHTALFGALWHGWTLHLIDAQVAADPDAFATYMQTQAIDLLKIVPSHLDALMQAQSPEAVLPGRCLLVGGEAAPTRLAERIAQLRPECRLINHYGPTETAVGVLTRSGAESRSATLPLGTPLAHVRARVVDADGNSVPKGATGELCIGGASVADGYLNRPSLTAERFVPDAEGNGTRVYRTGDRSRRLPSGEYAFLGRIDDQVKIR	Bacteria	Paraburkholderia
collaborator	ParaburkholderiamegapolitanaLMG23650	MegapolibactinA	DOI: 10.1002/anie.201906326	Ser-MegapolibactinA-ParaburkholderiamegapolitanaLMG23650-A3	ser	AQVGAQPDAVALVFPQPDGAVSTLTYSELHAWSARIARACAAVVTKTRRDGERRIGIAMGRTPALVAAILGVLRADAAYVPLDPAYPDDRLRDIALDAGLDAIVTTDAERARFAALVPGIDLIDAVSADRNGEHAHVAIDRVPHPEQLAYVIYTSGSTGRPKGVGITHANLTRLFTAGDRFYTFGPSDVWPLFHSYAFDVSVWELFGSLTHGGRLVVVPHDIARDAPALQRLLREQRVTVLNQTPSAFMPLCEIDAEIARRDPLATMETLRYVVFAGEKLDPPALANWFVAREENGIPVPALINMYGITETTVHVTFRSLGRGDIVRAEAPSVIGGPLSDLTLTVLDPFGEPVPVGAAGELHVGGAGLARGYLGRPGLTAARFVPDPAGAPGARVYRSG…	Bacteria	Paraburkholderia
collaborator	ParaburkholderiamegapolitanaLMG23650	MegapolibactinA	DOI: 10.1002/anie.201906326	Thr-MegapolibactinA-ParaburkholderiamegapolitanaLMG23650-A4	thr	IEQAAQHGDAVALSDGATQITYAQLDAWSRAIAAELLLQGVHAETRVGVAMQRSAGLVAALLGILRAGAAYVPLDPSYPAERLAHIVSDAQLGPIVADAASLEQHAALFAAHATLDADALRDRKLTASAGADFRAPHPEQLVYVIYTSGSTGLPKGVGITHRNVARLFDATAARFAFDAHDVWTLFHSYAFDFSVWEIFGALVHGGRLVIVPHWTAREPAAFHRLIRDERVTVLNQTPSAFTQLIHEDENNTLDSLRAVIFGGERLDPAALARWADGARARGVLPALVNMYGITETTVHVTHRDIDATALHDARSVIGAALDDLTLHVLDADLNRVPLGASGEMHVGGAGLARGYLGRAALTAERFVPDPFGAPGARLYRSGDLARRLADGDLEYLGRN…	Bacteria	Paraburkholderia
collaborator	ParaburkholderiamegapolitanaLMG23650	MegapolibactinA	DOI: 10.1002/anie.201906326	Gra-MegapolibactinA-ParaburkholderiamegapolitanaLMG23650-A5	gra	AQAARSPDAIAVRCEDASLSYAQLDAWSGAIAARLVARGVRAETRVGLCVTRGPAMLAALLGVIRSGGAFVPLDPEYPAARLAQMIEDAAIVQVLADDASAQRVADVLAGCEVVPVAFDGVAVVSPAVTLHPDQLAYVLYTSGSTGKPKGVAVSHGSLWTHLQDFLQTYRITSADTVLHSSTINFDVALHETLPALLMGATVEMRGVQPWDLQSLSERLVQRQVTFARIPTALWQQWQRSAPARESLALRQVTVGGEALPGDALGRWQSGPLGGIRLDNLYGPTETTVAALYRETLTEDVQQVTVPIGKPYPGRTARVIDAFGDAAPAGGLGELCIGGPTVARGYLGRAAQTAERFVPDPYGEPGSRQYRSGDLCRMRADGTVEFLGRLDQQVKLR	Bacteria	Paraburkholderia
collaborator	ParaburkholderiamegapolitanaLMG23650	MegapolibactinA	DOI: 10.1002/anie.201906326	Gra-MegapolibactinA-ParaburkholderiamegapolitanaLMG23650-A7	gra	AQAARSPDAIAVRCEDASLSYAQLDAWSGAIAARLVARGVRAETRVGLCVTRGPAMLAALLGVIRSGGAFVPLDPEYPAARLAQMIEDAGIVQVLADDASARQVADVLAGCEVVPVSLDGVPAAAPVVALHPDQLAYVLYTSGSTGKPKGVAVSHGSLWTHLQDFLQTYRITSADTVLHSSTINFDVALHETLPALLMGATVEMRGVQPWDLQSLSERLVQRQVTFARIPTALWQQWQRSAPARESLALRQVTVGGEALPGDALGRWQSGPLGGIRLDNLYGPTETTVAALYRETLTEDVQQVTVPIGKPYPGRTARVIDAFGDAAPAGGLGELCIGGPTVARGYLGRAAQTAERFVPDPYGEPGSRQYRSGDLCRMRADGTVEFLGRLDQQVKLR	Bacteria	Paraburkholderia
collaborator	BurkholderiathailandensisE264	ThailandepsinA/Burkholdac	DOI: 10.1128/AEM.01751-06	Cys-ThailandepsinA/Burkholdac-BurkholderiathailandensisE264-A1	cys	VRHANAHPDAVAVRQGGAALTYGQLLRDAEDIGSALQRLGVARGDVVAAVVEPGPRAVAALLGIELAGAVYLPVEPSWPSARIDALLREAGVRHAVATTGDFDLPVPSLRLDRPLARATPAPVADAGPSDAAYVIFTSGSTGRPKGVVITHEAAANTIDDINARFAVGPADRALCVSSLAFDLSVYDIFGLLAAGGAVVFPERARDPDAISQALSDAAVTIWNSVPAVLELLLDVAAPRSAHLRLALLSGDWIAPTLPERLRDAFPNVQPISLGGATEASIWSVVHPIAPADAALASIPYGKPLSNQQCFVRAPDGRERPHGVAGELLLGGCGLALAYLGNEAETARRFFVDADGRRLYRTGDLARWLPSGELELLGRMDGQVKV	Bacteria	Burkholderia
collaborator	BurkholderiathailandensisE264	ThailandepsinA/Burkholdac	DOI: 10.1128/AEM.01751-06	Met-ThailandepsinA/Burkholdac-BurkholderiathailandensisE264-A2	met	FEAQAQRTPDATAAVFEERALSYAELNRRANRLAHHLIARGVRPDDRVAICTGRGLDAVVGLLAVLKAGGAYVPLDPAYPAARLAYMLDDAAPAAVLTTAALADELAFKLPTILLDAQNPSFESQPNDNPDPAALGLTSRHLAYVIYTSGSTGQPKGVMVEHGNLVNLIQSNRQHFSGVGQARTCCWTSFGFDVCVFEIFMSLAMGGTVHVVPDRLRISADGFFQWLIAQRIEVAYLPPFLVRRLREYSDELVASLSLRRILVGVEPLREKDLYRLERLLPELIVVNGYGPTETTVFSTSYLDMRDYDRAAPIGRPIANTRIYILDSHGQPVPIGVAGEIHIAGAGVARGYLNRPELTAERFVSDSFAAAPNARMYRTGDLGRWLPDGTIEYLGRNDFQ…	Bacteria	Burkholderia
collaborator	BurkholderiathailandensisE264	ThailandepsinA/Burkholdac	DOI: 10.1128/AEM.01751-06	Cys-ThailandepsinA/Burkholdac-BurkholderiathailandensisE264-A3	cys	ERHAALTPLAPAIICAEGCMQYRELAAETRRVAGAVVAAGARREPVAVLLPRSVGAIAAYSGVMRAGCAYVPIDPATPPERMRDVLATLNYVLTTRALAAALDGIDARVILVDEAAAADVAPPTVALDDLAYVMFTSGSTGKPKGVMIDHRAASLTIESILRRYAIGPADRLLCVSSVGFDLSVFDFFGAFAAGAAVVLAPESSNVEPHVWLDLMERERATVWESVPAVMELLLLECRNSGRKLPPSLKLVMLSGDRVPVSLPARIREAATAELHVIALGGATEAAIWSCYYDTRHLPPDASFVPYGRHLPGQRLYVLSSSLRPLPIGVPGDLWIAGAGVARGYLGQPDLTAYRFVADPHVPGERMYRTGDRARVLADGNLEFLGRVDDQVKIR	Bacteria	Burkholderia
collaborator	BurkholderiathailandensisMSMB43	FK228	DOI: 10.1016/j.synbio.2018.10.011	Cys-FK228-BurkholderiathailandensisMSMB43-A1	cys	RHARVAPDAVAVRQGETALTYGALLHDAEDIASALRQRGVARGDVVAALVAPGPRAVAALLGIVMAGAVYLPIEPSWPSARIDELLGEAGARHAVVTAGGLELPVPTLRLDLPLPRGVPALLADTEAGDAAYVIFTSGSTGRPKGVLIAHDAAANTIDDINARFAVGPADRTLCVSSLAFDLSVYDIFGALAAGGTVVFPERARDPDAIAHALRDAQVTIWNSVPAVLELLLDVAAPRSPDLRVALLSGDWIPPGLAARLRDAFPALQPISLGGATEVSIWSVVHPIAPADAVLASIPYGRPLSNQQCFVRTPDGRERPDGVVGELLLGGRGLALAYLGNYAETARRFFVDADGQRLYRTGDLARWLPDGELELLGRMDGQVKV	Bacteria	Burkholderia
collaborator	BurkholderiathailandensisMSMB43	FK228	DOI: 10.1016/j.synbio.2018.10.011	Val-FK228-BurkholderiathailandensisMSMB43-A2	val	FREQAAAHPGRTALEQSAARWTYADLDRWSDRATASLRAAGVAPGAVVGVAGERSPRLLAAFLAVLKAGAAYLPLDPGYPAARLRAMLADAAPALVIVADGLDTGWLGDYAGTVLRLSDCEAEAAPARVDAAGDARRATADDLAYVMYTSGSTGQPKGVAIPHRGVVRLATGGAYARLDASTVMLQQSPLGFDASTFEIWGCWLNGGRLVLAASGMPFFDAVSAAIAHDGVTTMWLTADLFRMMVDEEPAALGGLRELLAGGDALPVASCRAFLDACPGVALINGYGPTENTTFTCSHRVTAADVRRGSIPIGRPIGNTEVRVVDARGRLVPVGVPGELWAGGDGLALGYLGRADLTAERFVDTQPPDGGRWYRTGDRVRWRRDGVLEFLGRIDAQIKLR	Bacteria	Burkholderia
collaborator	BurkholderiathailandensisMSMB43	FK228	DOI: 10.1016/j.synbio.2018.10.011	Cys-FK228-BurkholderiathailandensisMSMB43-A3	cys	ERHARLTPLAPAIVGDGDAMNYRELADETLRVARAVAAAGARREPVAVLLPRGTRTVAAYSGVMRAGCAYVPADPAMPPGRLRDVLATVGYVLTTRANLSLLDGVAARAIVIDAHESAAADAALPEVALDDLAYVMFTSGSTGKPKGVMITHRAASLTIEAILRRHAIGASDRLMCVSAAGFDLSVFDFFGAFAAGAAVVLAPESSTVAPGVWLDLMARERATVWESVPAVMELLLLECRQSDRTLPPSLKLVMLSGDRVPVGLPAQIRAAAISDPEVLALGGATEAAIWSCWYDTRGLAPDAAFVPYGRHLPGQRLYVLSSSLQAVPIGVPGDLWIAGAGVALGYLGQPDLTVYRFVDNPHVPGERMYRTGDRARVLADGNLEFLGRVDDQVKIG	Bacteria	Burkholderia
collaborator	BurkholderiathailandensisMSMB43	FK228	DOI: 10.1016/j.synbio.2018.10.011	Thr-FK228-BurkholderiathailandensisMSMB43-A4	thr	FEDHARVRPDAVAVQCDGQALSYAELDRRANRLAWRLHAAGVRGNVPVALAFERGLDSIVAILAVLKAGAFYVPLDLDYPPEHLAWILDDIAAGVLICDDAQRERFDSFGGTRLTIRDDADADAADARVDAPPPRDTSPADLCYVIYTSGSTGQPKGVCVEHRNVDHLFASTRRTYSIGSSDVWTQFHSYAFDFSVWEIWGALLHGGRLEVVPYRCSRTPGEFLALLARTGVTMLSQTPTAFKQLLRALDDARQPLPASLRYVFFGGEATIPCQFAACLSDAHGVVLVNLYGITETTVHVTERMLGPGDAQASRSPIGRPLPGYRVYLLDDAGHPVPPGVPGEIHVGGEGVARGYHNRPELDRARFVADPFVPGARLYRSGDLGCFDACGELDYLGRID…	Bacteria	Burkholderia
