# Supplementary material for: Feature sequence-based genome mining uncovers the hidden diversity of bacterial siderophore pathways
Source: eLife. 2024 Oct 1;13:RP96719. doi: 10.7554/eLife.96719 (PMC11444679; doi:10.7554/eLife.96719)
Supplement: Supplementary file 9. [file elife-96719-supp9.xlsx]

## Sheet: Sheet1
Source	domainid in table7	Our approach predict substrate	Real substrate	antisMASH predict substrate	Predict rigth(1) or wrong(0) of our approach	Predict rigth(1) or wrong(0) of antiSMASH	2nd metabolite（product）	Number of amino acids	Class	Accuracy(%) of our approach	Accuracy(%) of antiSMASH	Average_accuracy(%) of pur apporch	Average_accuracy(%) of antiSMASH
collaborator	Ala-rhizomide-Mycetohabitansrhizoxinica-A5	ala	ala	ala	1	1	rhizomide	2	toxin	100	100	83.2576	67.0034
collaborator	Ala-rhizomide-Mycetohabitansrhizoxinica-A6	ala	ala	ala	1	1
collaborator	Val-Holrhizin-Mycetohabitansrhizoxinica-A1	val	val	val	1	1	Holrhizin	3	biosurfactant/toxin	100	100
collaborator	Ala-Holrhizin-Mycetohabitansrhizoxinica-A5	ala	ala	ala	1	1
collaborator	Ile-Holrhizin-Mycetohabitansrhizoxinica-A6	ile	ile	ile	1	1
collaborator	Val-Glidonin-SchlegelellabrevitaleaDSM7029-A4	val	val	val	1	1	Glidonin	7	biosurfactant/biofilm formation	85.7143	100
collaborator	Phe-Glidonin-SchlegelellabrevitaleaDSM7029-A5	leu	phe	phe	0	1
collaborator	Pro-Glidonin-SchlegelellabrevitaleaDSM7029-A6	pro	pro	pro	1	1
collaborator	Val-Glidonin-SchlegelellabrevitaleaDSM7029-A8	val	val	val	1	1
collaborator	Ala-Glidonin-SchlegelellabrevitaleaDSM7029-A9	ala	ala	ala	1	1
collaborator	Ala-Glidonin-SchlegelellabrevitaleaDSM7029-A10	ala	ala	ala	1	1
collaborator	Ala-Glidonin-SchlegelellabrevitaleaDSM7029-A12	ala	ala	ala	1	1
collaborator	Ser-Glidopeptin-SchlegelellabrevitaleaDSM7029-A1	ser	ser	ser	1	1	Glidopeptin	7	antitumor/toxin	100	100
collaborator	Thr-Glidopeptin-SchlegelellabrevitaleaDSM7029-A5	thr	thr	thr	1	1
collaborator	Leu-Glidopeptin-SchlegelellabrevitaleaDSM7029-A6	leu	leu	leu	1	1
collaborator	Dab-Glidopeptin-SchlegelellabrevitaleaDSM7029-A7	dab	dab	dab	1	1
collaborator	Ser-Glidopeptin-SchlegelellabrevitaleaDSM7029-A8	ser	ser	ser	1	1
collaborator	Thr-Glidopeptin-SchlegelellabrevitaleaDSM7029-A9	thr	thr	thr	1	1
collaborator	Val-Glidopeptin-SchlegelellabrevitaleaDSM7029-A12	val	val	val	1	1
collaborator	Dab-Gldiomide-SchlegelellabrevitaleaDSM7029-A2	dab	dab	X	1	0	Gldiomide	5	linear lipoheptapeptides	100	60
collaborator	Asp-Gldiomide-SchlegelellabrevitaleaDSM7029-A3	asp	asp	asp	1	1
collaborator	Thr-Gldiomide-SchlegelellabrevitaleaDSM7029-A4	thr	thr	thr	1	1
collaborator	Ser-Gldiomide-SchlegelellabrevitaleaDSM7029-A5	ser	ser	ser	1	1
collaborator	Dab-Gldiomide-SchlegelellabrevitaleaDSM7029-A7	dab	dab	X	1	0
collaborator	Thr-Gldiobactin-SchlegelellabrevitaleaDSM7029-A1	thr	thr	thr	1	1	Gldiobactin	3	antitumor	33.3333	33.3333
collaborator	Lys/OH-Lys-Gldiobactin-SchlegelellabrevitaleaDSM7029-A2	cys	lys	orn	0	0
collaborator	Ala-Gldiobactin-SchlegelellabrevitaleaDSM7029-A3	leu	ala	X	0	0
collaborator	Ser-Chitinipeptin-ChitinimonaskoreensisDSM17726-A1	ser	ser	ser	1	1	Chitinipeptin	12	unknow	91.6667	66.6667
collaborator	Lys-Chitinipeptin-ChitinimonaskoreensisDSM17726-A2	lys	lys	X	1	0
collaborator	Glu-Chitinipeptin-ChitinimonaskoreensisDSM17726-A3	gln	glu	X	0	0
collaborator	Lys-Chitinipeptin-ChitinimonaskoreensisDSM17726-A4	lys	lys	X	1	0
collaborator	Thr-Chitinipeptin-ChitinimonaskoreensisDSM17726-A5	thr	thr	thr	1	1
collaborator	Leu-Chitinipeptin-ChitinimonaskoreensisDSM17726-A6	leu	leu	leu	1	1
collaborator	Dab-Chitinipeptin-ChitinimonaskoreensisDSM17726-A7	dab	dab	dab	1	1
collaborator	Ser-Chitinipeptin-ChitinimonaskoreensisDSM17726-A8	ser	ser	ser	1	1
collaborator	Thr-Chitinipeptin-ChitinimonaskoreensisDSM17726-A9	thr	thr	thr	1	1
collaborator	Asp-Chitinipeptin-ChitinimonaskoreensisDSM17726-A10	asp	asp	asp	1	1
collaborator	Gly-Chitinipeptin-ChitinimonaskoreensisDSM17726-A11	gly	gly	gly	1	1
collaborator	Lys-Chitinipeptin-ChitinimonaskoreensisDSM17726-A12	lys	lys	X	1	0
collaborator	Phe-Chitinimide-ChitinimonaskoreensisDSM17726-A1	tyr	phe	X	0	0	Chitinimide	8	detoxin/antitumor	50	87.5
collaborator	Thr-Chitinimides-ChitinimonaskoreensisDSM17726-A2	thr	thr	thr	1	1
collaborator	Ser-Chitinimide-ChitinimonaskoreensisDSM17726-A3	ser	ser	ser	1	1
collaborator	Thr-Chitinimides-ChitinimonaskoreensisDSM17726-A4	thr	thr	thr	1	1
collaborator	Arg-Chitinimide-ChitinimonaskoreensisDSM17726-A5	asp	arg	arg	0	1
collaborator	Pro-Chitinimides-ChitinimonaskoreensisDSM17726-A6	pro	pro	pro	1	1
collaborator	Ile-Chitinimide-ChitinimonaskoreensisDSM17726-A9	val	ile	ile	0	1
collaborator	Pro-Chitinimides-ChitinimonaskoreensisDSM17726-A10	paba	pro	pro	0	1
collaborator	Arg-Variochelin-Variovoraxboronicumulans-A1	lys	arg	X	0	0	Variochelin	5	siderophore	80	60
collaborator	Asp-Variochelin-Variovoraxboronicumulans-A2	asp	asp	asp	1	1
collaborator	Ser-Variochelin-Variovoraxboronicumulans-A3	ser	ser	ser	1	1
collaborator	Pro-Variochelin-Variovoraxboronicumulans-A4	pro	pro	pro	1	1
collaborator	Nδ-acetyl-Nδ-hydroxyornithine-Variochelin-Variovoraxboronicumulans-A6	orn	orn	X	1	0
collaborator	Ala-Bactobolin-BurkholderiathailandensisE264-A1	gly	ala	gly	0	0	Bactobolin	2	antitumor/toxin	50	50
collaborator	Ala-Bactobolin-BurkholderiathailandensisE264-A2	ala	ala	ala	1	1
collaborator	Thr-Haereogladin-Burkholderiagladiolipv.agaricicola-A1	thr	thr	thr	1	1	Haereogladin	3	lipopeptide/biosurfactant/bacterial virulence factor	100	66.6667
collaborator	Thr-Haereogladin-Burkholderiagladiolipv.agaricicola-A2	thr	thr	thr	1	1
collaborator	Tyr/OH-Tyr-Haereogladin-Burkholderiagladiolipv.agaricicola-A3	tyr	tyr	bht	1	0
collaborator	Thr-Burriogladin-Burkholderiagladiolipv.agaricicola-A1	thr	thr	thr	1	1	Burriogladin	6	lipopeptide/biosurfactant/bacterial virulence factor	66.6667	66.6667
collaborator	Pro-Burriogladin-Burkholderiagladiolipv.agaricicola-A2	pro	pro	pro	1	1
collaborator	Gln-Burriogladin-Burkholderiagladiolipv.agaricicola-A3	his	gln	gln	0	1
collaborator	Hpg-Burriogladin-Burkholderiagladiolipv.agaricicola-A5	hpg	hpg	X	1	0
collaborator	Phe-Burriogladin-Burkholderiagladiolipv.agaricicola-A6	tyr	phe	X	0	0
collaborator	Pro-Burriogladin-Burkholderiagladiolipv.agaricicola-A7	pro	pro	pro	1	1
collaborator	Thr-Haereoglumin-BurkholderiaglumaePG1-A1	thr	thr	thr	1	1	Haereoglumin	5	lipopeptide/biosurfactant/bacterial virulence factor	80	60
collaborator	Thr-Haereoglumin-BurkholderiaglumaePG1-A2	thr	thr	thr	1	1
collaborator	Leu-Haereoglumin-BurkholderiaglumaePG1-A3	leu	leu	leu	1	1
collaborator	Leu-Haereoglumin-BurkholderiaglumaePG1-A4	hpg	leu	ile	0	0
collaborator	p-aminobenzoate(PABA)-Haereoglumin-BurkholderiaglumaePG1-A5	paba	paba	X	1	0
collaborator	Thr-Burrioglumin-BurkholderiaglumaePG1-A1	thr	thr	thr	1	1	Burrioglumin	6	lipopeptide/biosurfactant/bacterial virulence factor	83.3333	83.3333
collaborator	Pro-Burrioglumin-BurkholderiaglumaePG1-A2	pro	pro	pro	1	1
collaborator	Ser-Burrioglumin-BurkholderiaglumaePG1-A3	ser	ser	ser	1	1
collaborator	Ala-Burrioglumin-BurkholderiaglumaePG1-A4	ala	ala	ala	1	1
collaborator	Phe-Burrioglumin-BurkholderiaglumaePG1-A6	tyr	phe	X	0	0
collaborator	Pro-Burrioglumin-BurkholderiaglumaePG1-A7	pro	pro	pro	1	1
collaborator	Thr-Haereomegapolitanin-ParaburkholderiamegapolitanaDSM23488-A1	thr	thr	thr	1	1	Haereomegapolitanin	5	lipopeptide/biosurfactant	80	60
collaborator	Ser-Haereomegapolitanin-ParaburkholderiamegapolitanaDSM23488-A2	ser	ser	ser	1	1
collaborator	OH-Leu-Haereomegapolitanin-ParaburkholderiamegapolitanaDSM23488-A3	leu	leu	leu	1	1
collaborator	Thr-Haereomegapolitanin-ParaburkholderiamegapolitanaDSM23488-A4	hpg	thr	ile	0	0
collaborator	PABA-Haereomegapolitanin-ParaburkholderiamegapolitanaDSM23488-A5	paba	paba	X	1	0
collaborator	Thr-Burriogladiodin-BurkholderiagladioliATCC10248-A1	thr	thr	thr	1	1	Burriogladiodin	6	lipopeptide	66.6667	83.3333
collaborator	Pro-Burriogladiodin-BurkholderiagladioliATCC10248-A2	pro	pro	pro	1	1
collaborator	Gln-Burriogladiodin-BurkholderiagladioliATCC10248-A3	his	gln	gln	0	1
collaborator	Ala-Burriogladiodin-BurkholderiagladioliATCC10248-A4	ala	ala	ala	1	1
collaborator	Phe-Burriogladiodin-BurkholderiagladioliATCC10248-A6	tyr	phe	X	0	0
collaborator	Pro-Burriogladiodin-BurkholderiagladioliATCC10248-A7	pro	pro	pro	1	1
collaborator	Thr-Haereogladiodin-BurkholderiagladioliATCC10248-A1	thr	thr	thr	1	1	Haereogladiodin	5	lipopeptide	60	40
collaborator	Thr-Haereogladiodin-BurkholderiagladioliATCC10248-A2	thr	thr	thr	1	1
collaborator	Tyr-Haereogladiodin-BurkholderiagladioliATCC10248-A3	tyr	tyr	bht	1	0
collaborator	Leu-Haereogladiodin-BurkholderiagladioliATCC10248-A4	hpg	leu	ile	0	0
collaborator	Pro-Haereogladiodin-BurkholderiagladioliATCC10248-A5	paba	pro	X	0	0
collaborator	Thr-Haereoplantin-BurkholderiaplantariistrainATCC43733-A1	thr	thr	thr	1	1	Haereoplantin	4	lipopeptide/anti-Inflammatory	100	75
collaborator	Thr-Haereoplantin-BurkholderiaplantariistrainATCC43733-A2	thr	thr	thr	1	1
collaborator	Leu/OH-Leu-Haereoplantin-BurkholderiaplantariistrainATCC43733-A3	leu	leu	leu	1	1
collaborator	PABA-Haereoplantin-BurkholderiaplantariistrainATCC43733-A5	paba	paba	X	1	0
collaborator	Thr-HaereoplantinFGH-BurkholderiaplantariiDSM9509-A1	thr	thr	thr	1	1	HaereoplantinFGH	4	lipopeptide/anti-Inflammatory	100	75
collaborator	Thr-HaereoplantinFGH-BurkholderiaplantariiDSM9509-A2	thr	thr	thr	1	1
collaborator	Leu/OH-Leu-HaereoplantinFGH-BurkholderiaplantariiDSM9509-A3	leu	leu	leu	1	1
collaborator	PABA-HaereoplantinFGH-BurkholderiaplantariiDSM9509-A5	paba	paba	X	1	0
collaborator	Thr-Burrioplantin-BurkholderiaplantariistrainATCC43733-A1	thr	thr	thr	1	1	Burrioplantin	5	biosurfactant	80	60
collaborator	Ala-Burrioplantin-BurkholderiaplantariistrainATCC43733-A4	ala	ala	ala	1	1
collaborator	Hpg-Burrioplantin-BurkholderiaplantariistrainATCC43733-A5	hpg	hpg	X	1	0
collaborator	Phe-Burrioplantin-BurkholderiaplantariistrainATCC43733-A6	tyr	phe	X	0	0
collaborator	Pro-Burrioplantin-BurkholderiaplantariistrainATCC43733-A7	pro	pro	pro	1	1
collaborator	acyl-haOrn-caribactin-Paraburkholderiacaribensis-A1	orn	orn	X	1	0	caribactin	4	siderophore/biofilm formation	100	50
collaborator	OH-Asp-caribactin-Paraburkholderiacaribensis-A2	asp	asp	asp	1	1
collaborator	Ser-caribactin-Paraburkholderiacaribensis-A3	ser	ser	ser	1	1
collaborator	haOrn-caribactin-Paraburkholderiacaribensis-A4	orn	orn	X	1	0
collaborator	acyl-haOrn-ornibactin-Burkholderiacepacia-A1	orn	orn	X	1	0	ornibactin	4	siderophore/toxin	100	50
collaborator	OH-Asp-ornibactin-Burkholderiacepacia-A2	asp	asp	asp	1	1
collaborator	Ser-ornibactin-Burkholderiacepacia-A3	ser	ser	ser	1	1
collaborator	hfOrn-ornibactin-Burkholderiacepacia-A4	orn	orn	X	1	0
collaborator	leu-icosalide-Burkholderiagladioli-A1	leu	leu	leu	1	1	icosalide	4	toxin/lipocyclopeptide	100	100
collaborator	Ser-icosalide-Burkholderiagladioli-A2	ser	ser	ser	1	1
collaborator	Ser-icosalide-Burkholderiagladioli-A3	ser	ser	ser	1	1
collaborator	Leu-icosalide-Burkholderiagladioli-A4	leu	leu	leu	1	1
collaborator	acyl-haOrn-Malleobactin-Burkholderiapseudomallei-A1	orn	orn	X	1	0	Malleobactin	4	virulence factor/siderophore	100	50
collaborator	OH-Asp-Malleobactin-Burkholderiapseudomallei-A2	asp	asp	asp	1	1
collaborator	Ser-Malleobactin-Burkholderiapseudomallei-A3	ser	ser	ser	1	1
collaborator	hfOrn-Malleobactin-Burkholderiapseudomallei-A4	orn	orn	X	1	0
collaborator	Ser-Malleipeptin-Burkholderiapseudomallei-A1	ser	ser	ser	1	1	Malleipeptin	10	lipopeptide/biosurfactants/biofilm formation	80	60
collaborator	Glu-Malleipeptin-Burkholderiapseudomallei-A2	gln	glu	X	0	0
collaborator	Ser-Malleipeptin-Burkholderiapseudomallei-A3	ser	ser	ser	1	1
collaborator	Lys-Malleipeptin-Burkholderiapseudomallei-A4	lys	lys	X	1	0
collaborator	Leu-Malleipeptin-Burkholderiapseudomallei-A6	leu	leu	leu	1	1
collaborator	Dab-Malleipeptin-Burkholderiapseudomallei-A7	dab	dab	X	1	0
collaborator	Thr-Malleipeptin-Burkholderiapseudomallei-A8	thr	thr	thr	1	1
collaborator	Thr-Malleipeptin-Burkholderiapseudomallei-A9	thr	thr	thr	1	1
collaborator	Glu/hGlu-Malleipeptin-Burkholderiapseudomallei-A10	gln	glu	X	0	0
collaborator	Gly-Malleipeptin-Burkholderiapseudomallei-A11	gly	gly	gly	1	1
collaborator	Thr-Ralsolamycin-Ralstoniasolanacearum-A1	thr	thr	thr	1	1	Ralsolamycin	9	lipopeptide/inducer	100	77.7778
collaborator	OH-Tyr-Ralsolamycin-Ralstoniasolanacearum-A2	tyr	tyr	tyr	1	1
collaborator	Ser-Ralsolamycin-Ralstoniasolanacearum-A3	ser	ser	ser	1	1
collaborator	Homoserine-Ralsolamycin-Ralstoniasolanacearum-A4	ser	ser	X	1	0
collaborator	Val-Ralsolamycin-Ralstoniasolanacearum-A5	val	val	val	1	1
collaborator	Ser-Ralsolamycin-Ralstoniasolanacearum-A6	ser	ser	ser	1	1
collaborator	Gly-Ralsolamycin-Ralstoniasolanacearum-A7	gly	gly	gly	1	1
collaborator	Ala-Ralsolamycin-Ralstoniasolanacearum-A8	ala	ala	ala	1	1
collaborator	β-Ala-Ralsolamycin-Ralstoniasolanacearum-A9	ala	ala	X	1	0
collaborator	Ser-Occidiofungin-BurkholderiapyrrociniaLyc2-A1	ser	ser	ser	1	1	Occidiofungin	6	antifungal(toxin)	100	50
collaborator	OH-Tyr-Occidiofungin-BurkholderiapyrrociniaLyc2-A2	tyr	tyr	X	1	0
collaborator	DAB-Occidiofungin-BurkholderiapyrrociniaLyc2-A3	dab	dab	X	1	0
collaborator	Gly-Occidiofungin-BurkholderiapyrrociniaLyc2-A4	gly	gly	phe	1	0
collaborator	Asn-Occidiofungin-BurkholderiapyrrociniaLyc2-A5	asn	asn	asn	1	1
collaborator	Ser-Occidiofungin-BurkholderiapyrrociniaLyc2-A6	ser	ser	ser	1	1
collaborator	Val-Endopyrrole-ParaburkholderiarhizoxinicaHKI454-A1	val	val	val	1	1	Endopyrrole	8	cyclodepsipeptides	87.5	62.5
collaborator	Pro-Endopyrrole-ParaburkholderiarhizoxinicaHKI454-A2	pro	pro	X	1	0
collaborator	Val-Endopyrrole-ParaburkholderiarhizoxinicaHKI454-A3	val	val	X	1	0
collaborator	Val-Endopyrrole-ParaburkholderiarhizoxinicaHKI454-A4	val	val	val	1	1
collaborator	Thr-Endopyrrole-ParaburkholderiarhizoxinicaHKI454-A5	thr	thr	thr	1	1
collaborator	Thr-Endopyrrole-ParaburkholderiarhizoxinicaHKI454-A6	ser	thr	ser	0	0
collaborator	Tyr-Endopyrrole-ParaburkholderiarhizoxinicaHKI454-A7	tyr	tyr	tyr	1	1
collaborator	Tyr-Endopyrrole-ParaburkholderiarhizoxinicaHKI454-A8	tyr	tyr	tyr	1	1
collaborator	Asp-Plantaribactin-BurkholderiaplantariiDSM9509-A1	gra	asp	X	0	0	Plantaribactin	7	siderophore	14.2857	0
collaborator	Ser-Plantaribactin-BurkholderiaplantariiDSM9509-A2	gra	ser	X	0	0
collaborator	Ser-Plantaribactin-BurkholderiaplantariiDSM9509-A3	gly	ser	gly	0	0
collaborator	Orn-Plantaribactin-BurkholderiaplantariiDSM9509-A4	orn	orn	X	1	0
collaborator	Gln-Plantaribactin-BurkholderiaplantariiDSM9509-A6	ser	gln	ser	0	0
collaborator	Gly-Plantaribactin-BurkholderiaplantariiDSM9509-A7	ser	gly	ser	0	0
collaborator	Gra-Plantaribactin-BurkholderiaplantariiDSM9509-A8	arg	gra	X	0	0
collaborator	Asp-Gramibactin-ParaburkholderiagraminisC4D1M-A1	asp	asp	asp	1	1	Gramibactin	6	siderophore	100	66.6667
collaborator	Thr-Gramibactin-ParaburkholderiagraminisC4D1M-A2	thr	thr	thr	1	1
collaborator	Thr-Gramibactin-ParaburkholderiagraminisC4D1M-A3	thr	thr	thr	1	1
collaborator	Gra-Gramibactin-ParaburkholderiagraminisC4D1M-A4	gra	gra	X	1	0
collaborator	Gly-Gramibactin-ParaburkholderiagraminisC4D1M-A5	gly	gly	gly	1	1
collaborator	Gra-Gramibactin-ParaburkholderiagraminisC4D1M-A6	gra	gra	X	1	0
collaborator	Gly-MegapolibactinA-ParaburkholderiamegapolitanaLMG23650-A1	gly	gly	gly	1	1	MegapolibactinA	6	siderophore	83.3333	50
collaborator	Asp-MegapolibactinA-ParaburkholderiamegapolitanaLMG23650-A2	asp	asp	X	1	0
collaborator	Ser-MegapolibactinA-ParaburkholderiamegapolitanaLMG23650-A3	thr	ser	ser	0	1
collaborator	Thr-MegapolibactinA-ParaburkholderiamegapolitanaLMG23650-A4	thr	thr	thr	1	1
collaborator	Gra-MegapolibactinA-ParaburkholderiamegapolitanaLMG23650-A5	gra	gra	X	1	0
collaborator	Gra-MegapolibactinA-ParaburkholderiamegapolitanaLMG23650-A7	gra	gra	X	1	0
collaborator	Cys-ThailandepsinA/Burkholdac-BurkholderiathailandensisE264-A1	cys	cys	cys	1	1	ThailandepsinA/Burkholdac	3	antitumor	100	66.6667
collaborator	Met-ThailandepsinA/Burkholdac-BurkholderiathailandensisE264-A2	met	met	val	1	0
collaborator	Cys-ThailandepsinA/Burkholdac-BurkholderiathailandensisE264-A3	cys	cys	cys	1	1
collaborator	Cys-FK228-BurkholderiathailandensisMSMB43-A1	cys	cys	cys	1	1	FK228	4	antitumor	75	100
collaborator	Val-FK228-BurkholderiathailandensisMSMB43-A2	ser	val	val	0	1
collaborator	Cys-FK228-BurkholderiathailandensisMSMB43-A3	cys	cys	cys	1	1
collaborator	Thr-FK228-BurkholderiathailandensisMSMB43-A4	thr	thr	thr	1	1
