# Supplementary material for: Feature sequence-based genome mining uncovers the hidden diversity of bacterial siderophore pathways
Source: eLife. 2024 Oct 1;13:RP96719. doi: 10.7554/eLife.96719 (PMC11444679; doi:10.7554/eLife.96719)
Supplement: Supplementary file 10. [file elife-96719-supp10.xlsx]

## Sheet: Sheet1
FpvA
>Pseudomonas aeruginosa PAO1|PA2398
MPAPHGLSPLSKAFLMRRAFQRRILPHSLAMALSLPLAGYVQAQEVEFDIPPQALGSALQEFGRQADIQVLYRPEEVRNKRSSAIKGKLEPNQAITELLRGTGASVDFQGNAITISVAEAADSSVDLGATMITSNQLGTITEDSGSYTPGTIATATRLVLTPRETPQSITVVTRQNMDDFGLNNIDDVMRHTPGITVSAYDTDRNNYYARGFSINNFQYDGIPSTARNVGYSAGNTLSDMAIYDRVEVLKGATGLLTGAGSLGATINLIRKKPTHEFKGHVELGAGSWDNYRSELDVSGPLTESGNVRGRAVAAYQDKHSFMDHYERKTSVYYGILEFDLNPDTMLTVGADYQDNDPKGSGWSGSFPLFDSQGNRNDVSRSFNNGAKWSSWEQYTRTVF…
>Pseudomonas aeruginosa UCBPP-PA14|PA14_33680
MPAPHGLSPLSKAFLMRRAFQRRMLPHSLAMALSLPLAGYVQAQEIEFDIPPQALGSALQEFGRQADIQVLYRPEEVRNKRSSAIKGKLEPNQAITELLRGTGASVDFQGNAITISVAEAADSSVDLGATMITSNQLGTITEDSGSYTPGTIATATRLVLTPRETPQSITVVTRQNMDDFGLNNIDDVMRHTPGITVSAYDTDRNNYYARGFSINNFQYDGIPSTARNVGYSAGNTLSDMAIYDRVEVLKGATGLLTGAGSLGATINLIRKKPTHEFKGHVELGAGSWDNYRSELDVSGPLTESGNVRGRAVAAYQDKHSFMDHYERKTSVYYGILEFDLNPDTMLTVGADYQDNDPKGSGWSGSFPLFDSQGNRNDVSRSFNNGAKWSSWEQYTRTVF…
>Pseudomonas putida KT2440 (TIGR)|PP_4217
MPTQRLRPHALALVIRRSLRLAAPMAVGLAGLPAIAQAQQVQFNVPAQPLASALLAFGSQSNLQVLYSPQDVEGKRSSALTGAMEPAAALSRLLQGTGVSYQIQGNQVTIHTREGGAAVELGATNIDGKGLGQTTENTGSYTTGSMQTATKLPLTLRETPQAVTVITRQRMDDQSMRSLDDVVQATPGLRMSAARPANSEYFSRGFPINNLMFDGLPTTYNADWVAAADMAPYDRVEIVRGATGMMQGAGNPSAAINMVRKRPTKDFQGSVTGSAGSWDNYRGELDLSGPLNDNGSVRGRFVGAYNDKDSYQDYAGRERGLFYGITEFDLTDDTTLTVGASNQNDNNNINWGGLPVNRDGSHVGYSRSRNMGYDWSYQDIDNTTVFAEVDHRFDNDWRL…
>Pseudomonas fluorescens SBW25|PFLU2545
MSARLGLSPLSKALTRALNINLLPSALALAVSLPVAGYVQAQEIELDIPAQALGSALQEFGRQANLQVLYSPTDVAGKNSTAIKGKLDPQQAINTLLAGTSTTHSLSGNALTVTAAGASAGLELSPTQVTGNVLGNITEGSGSYTPGTIATATRLTLTPRETPQSITVITRQHIEDFGLNNVDDVMRHTPGITVSAYDTDRTNYYSRGFSVNSFQYDGIPSTVRNVGYSAGNTLSDMAIYDRVEVLKGATGLLNGAGSLGATINLIRKKPTSEFKGHVQLGAGSWDNYRSEVDVSGPLTDSGNVRGRAVAAYQDKKSFMDHYSRKTETYYGITEFDLSPDTMLTVGFDYQDNIPKGSSWSGSFPLVNSNGSINKMPRSYNNGATWSSWEQNTRTAFAML…
>Pseudomonas aeruginosa LESB58|PALES_28981
MEKNMPTAHAVSPLARALGSLGANKMSRLGLALLLVSAQAVAQEYEFNVPAQRLDAALQALGRQAGLQVLYNPSDLSGLRSRSVSGKLELEQAISQLLDGANGIGFELQGKTLILRLQDSSSVISLDSMVVSGLALNPTTENSGSYASPAVSIGKGNKSIKEIPQSVTVVTQKRMQDQNMSTVSDVLANAPGVTSIPMFGTGEQYYSRGFFIENFQYDGVPLERQSYARGSDFSGQTAIFDRVEILRGAQGLLEGGGNPSGSVNFVRKRPTAENQVRLTAKAGSWDHYGTQADISGPIDEQGRLRGRLVLDYDTKNSFVDHVGDDRQTIYAALDYDLTEATRLGFGFSRERIDANIDVNGLPNYTDGSMPHFSRSTFLGGDWSYWDKIQETFYFDIAHQ…
>Pseudomonas protegens Pf-5|PFL_4092
MPAQHRLTPLTKALLRQAFSPKLASRTLGLALTLPLMAQVQAQEIHFNIVSQSMSAALQEFGRQANMQVLYNPDDVQGKRSNALSGSYSPERAIAAMLNGTGVAYTLKDNSVTIRNHGGNGSLELGTSTISGQGLGTTTEDTGSYTTGAMQTASKLSLTARETPQSVTVITRQRMDDQNMRSLEDVLKATPGISITKDGPQRPTFYSRGFAVENLMTDGLPNDLTHYLSRDMNSSADMAIFDHVEVVRGATGMMQGAGNPSAAINMVRKRPTATPRVTVTGSAGSWDDYRTEIDASNALNESGTLRGRVVAAYQSKGSFQDFVSSERNVFYGITEADLNEDTTFTFGASNQSGRNNTSWGGLPVAADGSDLHLKRSTYLGSKWEYWDQNNTTAFSRLEY…
>Pseudomonas aeruginosa PAO1-VE2|N296_2471
MRRAFQRRILPHSLAMALSLPLAGYVQAQEVEFDIPPQALGSALQEFGRQADIQVLYRPEEVRNKRSSAIKGKLEPNQAITELLRGTGASVDFQGNAITISVAEAADSSVDLGATMITSNQLGTITEDSGSYTPGTIATATRLVLTPRETPQSITVVTRQNMDDFGLNNIDDVMRHTPGITVSAYDTDRNNYYARGFSINNFQYDGIPSTARNVGYSAGNTLSDMAIYDRVEVLKGATGLLTGAGSLGATINLIRKKPTHEFKGHVELGAGSWDNYRSELDVSGPLTESGNVRGRAVAAYQDKHSFMDHYERKTSVYYGILEFDLNPDTMLTVGADYQDNDPKGSGWSGSFPLFDSQGNRNDVSRSFNNGAKWSSWEQYTRTVFANLEHNFANGWVGKV…
>Pseudomonas chlororaphis O6|PchlO6_4229
MSMPAQHRLTPLAKALLGQAFSPRMASRTLGLALTLPLMAQVQAQEIHFNIAAQSMASALQEFGRQANLQVLYSPDDVQGKRSNALSGSYSPERAIAAMLNGTGVAYSLKGNSVTILNRASAGSLELGTSTITAQGLDSTTEDTGSYTTGPMQTASKLALTARETPQSVTVITRQRMDDQNMKTLEDVLKATPGISVTKDGPQRPTFYSRGFAIENLMVDGLSNDLSHYLSRDMNSTPDMAIFDRVEVVRGATGLMQGAGNPSAAVNMVHKRPTATPRVTLTGSAGSWDNYRTEFDASNALNESGTLRGRIVTAYQTKDSFQDFVSSERSVFYGITEADLNEDTTFTFGISNQNANNNTSWGGLPVAADGSDLHLKRSTYLGSDWEFWDQDNTTAFTRL…
>Pseudomonas entomophila L48|PSEEN3225
MSTLSDFTPLAKALLLRHSLRRTLPVALMGITLGLPMAGLAQAQEYDVDIAAQSLPSALKQLADQTNLQVLYSPDDVQGVRSSAVRGHLSAQAAAAGLLRGTGVRYSLDGNTLTLQSNDSSAAVTLDPSVINAKGQENPYGPVEGYIATRSTTATKTDTSLMETPQSISVITRDRMTAQGAQTVSDSLAYTAGVYSNVAGNNPTDNTIMVRGFQQINANAYTDGLRNNQVGYYSPETYGMERIEVLKGPASVMYGQGSPGGTLNFVSKRPTFSPHHEVGISGGSNDRAQAYMDIGDVLDEQKTLSYRLVALGRDANSSIDYIKDDRVYIAPSLTWAPNEDTSLTLLTSYQRNKNLFTSNLPYSLFDGSNPNGKLPRHRSLNEPGFDAEKAEQTSVGYEL…
>Pseudomonas aeruginosa C7447m|M802_2468
MRRAFQRRILPHSLAMALSLPLAGYVQAQEVEFDIPPQALGSALQEFGRQADIQVLYRPEEVRNKRSSAIKGKLEPNQAITELLRGTGASVDFQGNAITISVAEAADSSVDLGATMITSNQLGTITEDSGSYTPGTIATATRLVLTPRETPQSITVVTRQNMDDFGLNNIDDVMRHTPGITVSAYDTDRNNYYARGFSINNFQYDGIPSTARNVGYSAGNTLSDMAIYDRVEVLKGATGLLTGAGSLGATINLIRKKPTHEFKGHVELGAGSWDNYRSELDVSGPLTESGNVRGRAVAAYQDKHSFMDHYERKTSVYYGILEFDLNPDTMLTVGADYQDNDPKGSGWSGSFPLFDSQGNRNDVSRSFNNGAKWSSWEQYTRTVFANLEHNFANGWVGKV…
>Pseudomonas putida NBRC 14164 - Assembly GCF_000412675.1|PP4_37750
MPHLHPTPATKLSQAVRLVVFGMALASAPGLLLMPAQAMAQSRTAYHVPAGPLGNAITQFGVQAGVTISFDTAQTRNLSSAGLEGSYSVDEGLIRLLANSGLQAQRQGNGGYVLMPADNGSAMELGPMNIDANRLDATSEGTQSYTAHAVTIGKGVHTLKETPQSVTVMTRKMLDDQNLNTLEQVLDKTPGITVYDSPMGGKYFYSRGFNLDGQYQYDGVPLDVGGNYVQANSFSSDMAFYDRVEILKGAAGMMKGSGSSAGGVNFVRKRGQEQAATTVTLSAGSWDNYRGQVDVGGPLNESGTVRGRAVASLQDRQYFYDTAKRQDQILYGAIDWDVTLDTTLGFGLAYEDVDATPCYSGLPRYADGSDLKLSRSTCLGASWNDLQSQRVTGFADLKH…
>Pseudomonas putida NBRC 14164 - Assembly GCF_000412675.1|PP4_28380
MRRLISPPRQALTFALLGASLALLPPLLPGAAMAQAANAQKTYTISGGPLSTVLGRFANAAGVVLSFDSQLTAGKQSAGLQGTYSVEQGFAALLAGTGLGAAPAEQGAYVLYPTESGNAVQLGATSVVGDGLAETTENTGAYTTGRTRTATKLGLSLRETPQSVSVVTRQVMNDHHLASIDDVVKFTPGLSSNHRDSERYTFYARGFQIQNFQYDGIPAQIANESQQFTSTLADMAIYDRVEVVRGATGLLSGAGTPSATLNLVRKRPTEDAQATVAGEVGSWDRYRTEADVSGPLTEAGNIRGRLVGVYETANSFVDWYKTDKRVMYGALDIDLSEDTLLRLSLDYQNNNADGVSFGHIPLFNSDGSATNFSRSFNPAARWSYLNNTQYNFTGLLEHK…
>Pseudomonas synxantha BG33R|PseBG33_2445
MPARLGLSPLSKALSMRRALNINLLPSALALAVSMPIAGYVQAQEIELNIPAQSLGSALQEFGRQTNVQVLYSPGDVQGKNSRAVKGKMQPQQAIDALLAGSQTTYSLNGNTLTVAAASSGGGLELSPTEVTANYLGNITEGSGSYTPGTIATATRLTLTPRQTPQSITVVTRQHIEDFGLNNMDDVMRHTPGITVSAYDSDRTNYYSRGFSVNSFQYDGIPSTVRNVGYSAGNTLSDMAIYDRVEILKGATGLLNGAGSLGATINLIRKKPTSDFKGHVQLGAGSWDNYRSEVDVSGPLTDSGNVRGRAVAAYQDKKSFMDHYSRKTETYYGITEFDLSPDTMLTVGFDYQDNIPQGSSWSGSFPLVNSNGSINKMPRSYNNGTTWSSWEQNTRTAFA…
>Pseudomonas fluorescens Q2-87|PflQ2_1672
MSAIHELKPLFKALVMSRGLRSRRVLTGLGLVCVMPLSAQVMAEDVSIDIPAQSLPQALQAFGQQTNQQVIYNAADMAGLKSTRVSGKMSPQAAIAELLKGTGVRYSLEGSTIMLVRGSATTGMELGATTINAQQLDATTEGSHSYTSNAVTIGKGTHTLKEIPQSITVMTRKQMDDQNLVSLKDAVNQTTGIVGLQGVGQGMILSSRGFQIDDWQYDGVPIPRNTYSLGNWATQDLIFFDRLEVMRGASGLLQGTGSPGGAVNLVRKRGQSAPTVTLTGKAGSWDHYGLQLDAGGPLNDAGNIRGRVVLDEDQSNSFVDHTWNKTHSMYGALDVDLSEDTTLGFAVSQSNGESRGNIRGLPRYADGSMPDVSRSTYTGARWNRSDIDVTTLYADLEHR…
>Pseudomonas putida BIRD-1|PPUBIRD1_1632
MPTQRLRPHALALVIRRSLRLAAPMAVGLAGLPAIAQAQQVQFNVPAQPLASALLAFGSQSNLQVLYSPQDVEGKRSSALTGAMEPAAALSRLLQGTGVSYQIQGNQVTIHTREGGAAVELGATNIDGKGLGQTTENTGSYTTGSMQTATKLPLTLRETPQAVTVITRQRMDDQSMRSLDDVVQATPGLRMSAARPANSEYFSRGFPINNLMFDGLPTTYNADWVAAADMAPYDRVEIVRGATGMMQGAGNPSAAINMVRKRPTKDFQGSVTGSAGSWDNYRGELDLSGPLNDNGSVRGRFVGAYNDKDSYQDYAGRERGLFYGITEFDLTDDTTLTVGASNQNDNNNINWGGLPVNRDGSHVGYSRSRNMGYDWSYQDIDNTTVFAEVDHRFDNDWRL…
>Pseudomonas aeruginosa PAO1-VE13|N297_2471
MRRAFQRRILPHSLAMALSLPLAGYVQAQEVEFDIPPQALGSALQEFGRQADIQVLYRPEEVRNKRSSAIKGKLEPNQAITELLRGTGASVDFQGNAITISVAEAADSSVDLGATMITSNQLGTITEDSGSYTPGTIATATRLVLTPRETPQSITVVTRQNMDDFGLNNIDDVMRHTPGITVSAYDTDRNNYYARGFSINNFQYDGIPSTARNVGYSAGNTLSDMAIYDRVEVLKGATGLLTGAGSLGATINLIRKKPTHEFKGHVELGAGSWDNYRSELDVSGPLTESGNVRGRAVAAYQDKHSFMDHYERKTSVYYGILEFDLNPDTMLTVGADYQDNDPKGSGWSGSFPLFDSQGNRNDVSRSFNNGAKWSSWEQYTRTVFANLEHNFANGWVGKV…
>Pseudomonas fluorescens SS101|PflSS101_3096
MPVRLALSPLSAAVSMRRALKLNVLPSALALAVSLPVAGYVQAQEFELNIPAQPLSTALQVFGQQADLQILYSPDMVKDKHSSAVNGKMDPVAAIERLLAGTGVSYSLQGSSMIINAPSAATDALQLGATQINANQLGTITEGSGSYTPGTIATATKMVLTPRETPQSISVVTRQTMDDFGLNGIDDVMRHTPGITVSTFDSERTNYYSRGFPIQNFQYDGVPTTRNEGYSAGQTLSDMAIYDRVEVLKGTTGLMTGAGGPGGTINLVRKKPTAEFQGHVSLGAGSWDNYRSELDVGGPLTESGNVRGRAVVAYQDKHSFIDHYERKTNVYYGILEFDLTPDTLLTIGADYQNNDPKGSSWSGSRSLFDGMGNDIKFDRGYNNGPKWSSWGQYSRSVFA…
>Pseudomonas aeruginosa M18|PAM18_2643
MRNTLTLHPRLSTAALAMALLAPIASQAEAQKIQFDIGAQSLPSALRQFGQQSQLQVLYSADEVQGLRSNPVRGQLSVEAALAELLRGTGASYSLQGSSVTISAQRSADSVDLGDITVTSQESAWGHVNGYVAKRSGTGTKTDTPLKEIPQTINVVTQDEIKARGSQTVTEALRYTPGITGGGFADRVKIFDEPTSRGFSPAPMYLDGLHMPYGGGSTGGALQIDPYTLERIEVLKGPASVLFGQNQPGGIVNMVSKRPTAEPIHEVVLGGGSQDRRYGAFDVAGALDEQGTYLYRITGVGRDINSEIDYAEQKRFMLAPSFTWNPNEQTSLTFYGQYQKDNDVPEAQGLPAYGTVFSTPNGRIKRSTFIGEPGLNSYDRDQFVVGYEFSHEFNDVWTF…
>Pseudomonas putida Refseq_WP_016498402|14164
MSKSLPGPLNPLAKALLIRHSLRPWHALSHAGIGLALSTAMVAQVQAQEWALDIPAQSMNSALQALAKQTDTQLLYSPEDIGGLQSSALKGRHDLATSLRILLGGSGLRYQIDGNTVTVTAGSAAKDGQVELSATNVNSVGLDATTEGTGSYTTGVTSTATKMNLSLRETPQSITVVTRQRMDDQHLGAITDVLKQTPGITISQDGGERFNVYSRGSAIDTYQFDGVNTSQENQTRNMPSTLLDMALYDRVEIVRGATGLMTGAGEPGGVINLIRKKPTHEFKSYIKGSVGSWDNYRSEADVSGPLTETGNVRGRMVAAKQDNHTFMDWYDQKREIFYGVVEADVTDTTLVRFGVDYQKYRSTGSPGVPLLFTNGKQTDFSRSTSSGARWMYDDFETMN…
>Pseudomonas sp. UW4|PputUW4_01566
MQSLTLSRAPLALAIDRQKKFRTVVPGALLTLLLLGTSQVEAAPVNVNVPAQSLASALRELGQQTNLQILYSQDMVNGIKSTAVSGSMEPEQALKTLLLGSGINFQLNGNTVSLVPAVGDSSALQLGATSITGVALGPTTEGTHSYTSDEVTIGKGNIKLKDMPQSVSVVTRQRMDDQNMNSLQDAMRQVTGVTIKTYNSGSSLNDVYMRGFLVDQVQVDGVSQPTGQGDMATSFDLAMYDRIEVLRGPSGLYQGAGEPGGTINVVRKRALGKFALGGELAAGSYDHYRSMVDVTGPLNDQGTVRGRFITAYENNQSFVDYAQNERPMVYGRLEFDLDPATTLSVGGAYQKNNSTPAFGLPAYADGTLLDVPRSTFVDAKWNTLNEKVWESFAEVDHEL…
>Pseudomonas putida Refseq_NBRC-14164|WP_016500408
MGNHLSPLTLLAASLLTCATVQAQDATFSLDIPAQRLDRSLNALAQQTGTRILFSTDAAEGRQAAAVQGRMSVAQALQQLLAGSGLQLQRAGEGYLIGAPASGMALELGAINIDSQRYGNTTDGTGAYTLGTTRAGTGLDLSPRETPQSISVVTRQRMDDQGLNDLTEVLQQTPGLSVQSLGSERFNIYSRGYSVDNYQFDGIPTTLDIVSQVSAQSLADMAIYDHVEVLRGATGLLTGAGDPSATINLVRKRPTAEFKGHVSAGLGSWNKYRTEVDLSGPLTPNGNVRGRMVAAYQQNDSFVDHYHQEKQVFYGILEADLSDTTLLTVGADYQRNRPEGSSSVAFPLFYSNGEQTDFSRSTNSAARWSSNPQDALNTFASLEQKLGHDWSLRLAVNQM…
FpvB
>Pseudomonas aeruginosa PAO1|PA4168
MKHVVSSALLLGLSSLSLAAQAAPIALDLPAQPLAASLEQLQGASGLRIRFDRAAVADRRAPALRGTLEPSEALQRLLAGSGLSGEVRGGDAWVEAAATGAGIAPGDSVDLGALSVVATQDPATAAITEDSGSYTTRAMRTSTKLAMSIRETPQSVSVVTRQRMDDQGMRDLNDAVKGVTGLTVQQYGPARVKYAARGFDVDNIMYDGLPTSISTYTQDVISAADLAMFDRVEVVRGATGLMQGAGNPAAAINMVRKRPTQEFRASLQGSVGTWDRYRSEADVSGPLNSEGTLRGRAVVAYQKGNSFQDHVSSERGVFYGIAEADLSPDTTFAIGASNQNDNRNDNWVGLPSPLGGRHLDLKRSSYYGADWSYWDTDTTHLFSDLTHRFANGWQMKLAA…
>Pseudomonas aeruginosa UCBPP-PA14|PA14_09970
MKHVVSSALLLGLSSLSLAAQAAPIALDLPAQPLAASLEQLQGASGLRIRFDRAAVADRRAPALRGTLEPSEALQRLLAGSGLSGEVRGGDAWVEAAPTGAGIAPGDSVDLGALSVVATQDPATAAITEDSGSYTTRAMRTSTKLAMSIRETPQSVSVVTRQRMDDQGMRDLNDAVKGVTGLTVQQYGPARVKYAARGFDVDNIMYDGLPTSISTYTQDVISAADLAMFDRVEVVRGATGLMQGAGNPAAAINMVRKRPTQDFRASLQGSVGTWDRYRSEADVSGPLNSEGTLRGRAVVAYQKGNSFQDHVSSERGVFYGIAEADLSPDTTFAIGASNQNDNRNDNWVGLPSPLGGRHLDLKRSSYYGADWSYWDTDTTHLFSDLTHRFANGWQMKLAA…
>Pseudomonas aeruginosa LESB58|LESB58
MKHVVSSALLLGLSSLSLAAQAAPIALDLPAQPLAASLEQLQGASGLRIRFDRAAVADRRAPALRGTLEPSEALQRLLAGSGLSGEVRGGDAWVEAAATGAGIAPGDSVDLGALSVVATQDPATAAITEDSGSYTTRAMRTSTKLAMSIRETPQSVSVVTRQRMDDQGMRDLNDAVKGVTGLTVQQYGPARVKYAARGFDVDNIMYDGLPTSISTYTQDVISAADLAMFDRVEVVRGATGLMQGAGNPAAAINMVRKRPTQDFRASLQGSVGTWDRYRSEADVSGPLNSEGTLRGRAVVAYQKGNSFQDHVSSERGVFYGIAEADLSPDTTFAIGASNQNDNRNDNWVGLPSPLGGRHLDLKRSSYYGADWSYWDTDTTHLFSDLTHRFANGWQMKLAA…
>Pseudomonas syringae pv. syringae SM|PssSM_1996
MLRPFPPSLTGLIVLGLSAAAVAAPVQLDLPAQPLSKSLTQLSQASGLQISADDSLIASKQAPAVRGSLEPAQALSRLLLGSGLDAQVQGNAVKVFQPASNGPMTLGNVDISAQTGIAGMATTEGSGSYTTGSMSSATRLPLSIRETPQSVSVITRQRIEDQGMNDLNDVVKYAPGVTLRKFGSDRQQFLARGFAIDNLMYDGLPTIVSTFTLDTISGADLALYDRVEVVRGATGLMTGAGSPSATLNLIRKRPTTTPQVSVTTSAGSWDRYRTEVDASNRLNDSGTLRGRVVAAYETGNSFVDERDKERQTFYGVLEADLSESTTWTIGASRQRDDATSDWGSLPSGPNGENLDLPRSTFLSNDWAYWDRRNVSLFTDLTHHFDNGWSSKLAATRIWA…
>Pseudomonas syringae pv. syringae B64|PssB64_3913
MLRPFPPSLTALVALGLSAAAVAAPVQLDLPAQPLSKSLTQLSQESGLQISADDSLIASKQAPAVRGSLEPAQALSRLLGSGLDAQVQGNAVKVFQPASNGPMTLGNVEISAQTGIAGMATTEGSGSYTTGSMSSATRLPLSIRETPQSVSVITRQRIEDQGMNDLNDVVKYAPGVTLRKFGSDRQQFLARGFAIDNLMYDGLPTIVSTFTLDTISGADLAMYDRVEVVRGATGLMTGAGSPSATLNLIRKRPTTTPQVSVTTSAGSWDRYRTEVDASNRLNDSGTLRGRVVAAYETGNSFVDERDKERQTFYGVLEADLSESTTWTIGASRQRDDATSDWGSLPSGPNGENLDLPRSTFLSNDWAYWDRHNVSLFTDLTHHFDNGWSSKLAATRIWAE…
>Pseudomonas aeruginosa M18|PAM18_0769
MKHVVSSALLLGLSSLSLAAQAAPIALDLPAQPLAASLEQLQGASGLRIRFDRAAVADRRAPALRGTLEPSEALQRLLAGSGLSGEVRGGDAWVEAAATGAGIAPGDSVDLGALSVVATQDPATAAITEDSGSYTTRAMRTSTKLAMSIRETPQSVSVVTRQRMDDQGMRDLNDAVKGVTGLTVQQYGPARVKYAARGFDVDNIMYDGLPTSISTYTQDVISAADLAMFDRVEVVRGATGLMQGAGNPAAAINMVRKRPTQDFRASLQGSVGTWDRYRSEADVSGPLNSEGTLRGRAVVAYQKGNSFQDHVSSERGVFYGIAEADLSPDTTFAIGASNQNDNRNDNWVGLPSPLGGRHLDLKRSSYYGADWSYWDTDTTHLFSDLTHRFANGWQMKLAA…
Others
>ferrioxamine receptor
MTATAVVLRNAPSSLDFPRASRLSRSVRAALLSLAMAAGAAPLCASAAEAAAEQARPYAIPAGQLGDVLNRFAREAGITLSATPAQTGGYSSQGLRGSFTVQQGLARLLADTPLEAEDQGDGSFVLREAPAKDGDVLNMQAVEVFALGNNLGSTDGYLATHSQIATKTSKPLLETSQTVSVITREQIDDTASKTVQQAMRYTPGIFTGQVGASNRYDYVVMRGFADNSVDNIYLDGLKAMGDSGTFSSMQVDPYFLERIDVLKGPSSVLYGRSLPGGLVALTSKKPLYEDYRQITGSIGNMGQKEMGFDFSGPLDEEKRIAYRLIGLGKGSDTQFDHVKEERYAIAPTLAIDFSDDTTLTLQGYLQHDPNGGYHGGVPADGTLSHHNGRHISREFFDGE…
>ferrichrome receptor
MPRPTFRPGLLALAIALAVPAPFLHAAPAEQASVRDYRIAAGPLAGTLNRIAAQAGLVLTLDPALAEGRSAHAVQGRFDAPGALREALKGSGLELVENAGGTYSLRKVPEDTLSLQAMTVSGAEEDPLGPTSGYVAKRSMTGTKTDTPILETPRSISVATRQQMTDRAVHNLDDAVRYMPGVVASSFGSDTRSDWLKVRGFKPTQFLDGLPMAVGVYNNPKLETWNLERVALLRGPASSVYGQTPPGGMLDMVSLRPQNVASHEVKAEVGNYNHKQVSFDSTGPLDDEGRFLYRVSGVVRESNTQVDHIDDKRYNIAPSLTWNIDDDTRLTFLGQFNRDDTGITSQFLPLRGTKYDAPFGKVSHHKNLGDPDWEYYDRTYYWLGYAFERRINDVWQFRQ…
>mycobactin receptor
MPVRTLRPRSLSLAIHAAAMTLALAGAAPALLAAEAPAASSARSYDIAPGPLGRTLSAFASDNGVSLAFDPALTEGRRSAALRGRYAPVEALHRLLLGSGLELQQRSDGSYTLVPAATDGALELQSSLITAQAAGAETLPAEYAGGQVARGARLGMLGNADVMDAPFSITSYTARTIEQQQARSVADLLQANDPSVRVVGGRGDLVDSYTIRGFSMQNADVAFNGLYGLLPFWRVPIEFAERVEVLKGPNALLGGISPGGSVGGTINLVPKRADDQPLTRVSVDWTQRGQLGTHLDIGRRFGENNAFGVRFNGVYRNGDTAVDHQSREFPMLSLGLDFRGERLRLSSDLLYQKESLEGVVRPLLTGPGTTHIPHAPDSKTRFGLRDSYLDQEDYSMVNR…
>aerobactin receptor
MFKLSTLGRGHHIMRRTLLAQALFAGALSPVLAQAQEAATVSQAGSAQERRVSLNLPAQPLDQALTRFADQADLRLLYTTSDVEGLQSTALNGEVTVAQALQSLLAGSGMSWSFSDGHTVILRRAGVPAASLNLKPTQVTVASRTSAAISEIPGTVWVVEQSQLREQLSTGVSLKEAIGKLVPGLDLAPEGRTNYGQNMRGRNVLVMIDGVSQNSSRGLSRQFDSISPFNVERVEVLSGASAIYGGGATGGIINIVTKKGEPGPARFETQLGASSGFNNSDDLTTRIAQSVSGGNEAISGRLAVAGEQNQAFYDGAGKQIFIDNTQTDLQYNRTLDLMGSLALQFNEEQSLDLLAQYYDSGNHGSTGIYFPNLKYKAPSNLEDAELRGGYSTDLEPRTK…
>citrate receptor
LRPNPFVHALLLTTTLGLAMPAAQAETRSYHIAAGSLEDALNQFGRESGALISFGSQLTQGMSTQGLDGQYDTRQGLDALLRGSGLQARQETDNAFSLQPITAPAAGAAVELGASTVVGDWLAEAQQDNVFEHPGARDVVRREEFERNGATTAREVLNRIPGVNAPDNNGTGSHDLALNFGIRGLNPRLASRSTVLMDGIPVPFAPYGQPQLSLAPLSMGNMDAVDVVRGGGAVRYGPQNVGGIVNFVTRAIPEQATFKAAMQNQISPSSSHEGFKNSANLLVGGTNDNGLGGALLYSGTRGGDWREHSDTQIDDLILKGKLQLDEANSLHAMAQYYEGEADMPGGLSTADFDADPYQSTRLKDKFWGRRTLFNFGYDYKQDDRQFSVNSFFTKTLRSG…
>achromobactin receptor
MSAVSSYRLRPLLHFSLLLTLSSSPLFISTSWADTSGRRAYEVPAGSLSAALTRFAGQAGVNLSVDPALVTGRNSSGLSGEFAVEEGFARLLQGSGLQLMPVGEQAYTLIPAPDSASAGLQLAPTSIVGDSGVTDGQDYAGGQVARKGSQGMLGSRDFMETPFSMTTYTKDAVKNQQARTLGDLIASDPSVRATNPAGGRYEQFTIRGFSLFNSDVSYNGLYGILPTYTIDMEMAERVDILKGPSQLINGISPRGSVGGGINVVPKRATDKPITELTTSYASKGQVGAAVDVARRFGEDDKFGIRFNGVKQSGDTEWDHQSVDRDMAVLGLDFRGDRLRLSTDIGHTERDTDAPQERVQVGANAKVPNANDVRDNYAQSWSKARTKDTFGAVNAEYDLS…
>ferrichrysobactin receptor
MKSRANSAVNGSVKRWFGASALVVSGLALLPLSVALAAQAGSEQHSALFNFAIAAKPLPQALSDFTRVTGISVVYTDEAPYNLKAPAVTGQLSAEQALQRLLGNSGFTYRRSDAHTLVLEPLPQGAGLNLGTSSITTQGVDESTSYQPPATTSVARSQALNQEIPQIINVIPAQVLRDQTPRNLDDALKNVSGITQTNTLGGTQDAVLLRGFGDNRNGSIMRDSMPVVQGRALNATAERVEVIKGPSSLLYGIQDPGGVINIVSKKPELQQSTALTVRGSTYGSGKNGSGGSLDTTGPLGDSGLAYRLVVDHEDEDYWRNFGTHRESLVAPSLAWYGERTKVLLAYEHREFLTPFDRGTAIDPKTNHPLDIPATRRLDEPFNNMEGRSDLYRFEVDHEL…
>rhizobactin receptor
MFKLSTLGRGHHIMRRTLLAQALFAGALSPVLAQAQEAATVSQAGSAQERRVSLNLPAQPLDQALTRFADQADLRLLYTTSDVEGLQSTALNGEVTVAQALQSLLAGSGMSWSFSDGHTVILRRAGVPAASLNLKPTQVTVASRTSAAISEIPGTVWVVEQSQLREQLSTGVSLKEAIGKLVPGLDLAPEGRTNYGQNMRGRNVLVMIDGVSQNSSRGLSRQFDSISPFNVERVEVLSGASAIYGGGATGGIINIVTKKGEPGPARFETQLGASSGFNNSDDLTTRIAQSVSGGNEAISGRLAVAGEQNQAFYDGAGKQIFIDNTQTDLQYNRTLDLMGSLALQFNEEQSLDLLAQYYDSGNHGSTGIYFPNLKYKAPSNLEDAELRGGYSTDLEPRTK…
