# Supplementary material for: Feature sequence-based genome mining uncovers the hidden diversity of bacterial siderophore pathways
Source: eLife. 2024 Oct 1;13:RP96719. doi: 10.7554/eLife.96719 (PMC11444679; doi:10.7554/eLife.96719)
Supplement: Supplementary file 11. [file elife-96719-supp11.xlsx]

## Sheet: Sheet1
genome	phylum	class	order	family	genus	species
'GCF_000018105.1'	'Cyanobacteriota'	'Cyanophyceae'	'Synechococcales'	'Acaryochloridaceae'	'Acaryochloris'	'Acaryochloris marina'
'GCF_000018105.1'	'Cyanobacteriota'	'Cyanophyceae'	'Synechococcales'	'Acaryochloridaceae'	'Acaryochloris'	'Acaryochloris marina'
'GCF_000018105.1'	'Cyanobacteriota'	'Cyanophyceae'	'Synechococcales'	'Acaryochloridaceae'	'Acaryochloris'	'Acaryochloris marina'
'GCF_000018105.1'	'Cyanobacteriota'	'Cyanophyceae'	'Synechococcales'	'Acaryochloridaceae'	'Acaryochloris'	'Acaryochloris marina'
'GCF_002278035.1'	'Pseudomonadota'	'Alphaproteobacteria'	'Hyphomicrobiales'	'Brucellaceae'	'Brucella'	'[Ochrobactrum] quorumnocens'
'GCF_022807975.1'	'Bacteroidota'	'Flavobacteriia'	'Flavobacteriales'	'Flavobacteriaceae'	'Abyssalbus'	'Abyssalbus ytuae'
'GCF_022807975.1'	'Bacteroidota'	'Flavobacteriia'	'Flavobacteriales'	'Flavobacteriaceae'	'Abyssalbus'	'Abyssalbus ytuae'
'GCF_008365315.1'	'Pseudomonadota'	'Alphaproteobacteria'	'Rhodospirillales'	'Acetobacteraceae'	'Acetobacter'	'Acetobacter vaccinii'
'GCF_008365315.1'	'Pseudomonadota'	'Alphaproteobacteria'	'Rhodospirillales'	'Acetobacteraceae'	'Acetobacter'	'Acetobacter vaccinii'
'GCF_008365315.1'	'Pseudomonadota'	'Alphaproteobacteria'	'Rhodospirillales'	'Acetobacteraceae'	'Acetobacter'	'Acetobacter vaccinii'
'GCF_008365315.1'	'Pseudomonadota'	'Alphaproteobacteria'	'Rhodospirillales'	'Acetobacteraceae'	'Acetobacter'	'Acetobacter vaccinii'
'GCF_008365315.1'	'Pseudomonadota'	'Alphaproteobacteria'	'Rhodospirillales'	'Acetobacteraceae'	'Acetobacter'	'Acetobacter vaccinii'
'GCF_008365315.1'	'Pseudomonadota'	'Alphaproteobacteria'	'Rhodospirillales'	'Acetobacteraceae'	'Acetobacter'	'Acetobacter vaccinii'
'GCF_008365315.1'	'Pseudomonadota'	'Alphaproteobacteria'	'Rhodospirillales'	'Acetobacteraceae'	'Acetobacter'	'Acetobacter vaccinii'
'GCF_008365315.1'	'Pseudomonadota'	'Alphaproteobacteria'	'Rhodospirillales'	'Acetobacteraceae'	'Acetobacter'	'Acetobacter vaccinii'
'GCF_004014775.2'	'Pseudomonadota'	'Alphaproteobacteria'	'Rhodospirillales'	'Acetobacteraceae'	'Acetobacter'	'Acetobacter oryzoeni'
'GCF_016728825.1'	'Pseudomonadota'	'Betaproteobacteria'	'Burkholderiales'	'Alcaligenaceae'	'Achromobacter'	'Achromobacter xylosoxidans'
'GCF_016728825.1'	'Pseudomonadota'	'Betaproteobacteria'	'Burkholderiales'	'Alcaligenaceae'	'Achromobacter'	'Achromobacter xylosoxidans'
'GCF_016728825.1'	'Pseudomonadota'	'Betaproteobacteria'	'Burkholderiales'	'Alcaligenaceae'	'Achromobacter'	'Achromobacter xylosoxidans'
'GCF_016728825.1'	'Pseudomonadota'	'Betaproteobacteria'	'Burkholderiales'	'Alcaligenaceae'	'Achromobacter'	'Achromobacter xylosoxidans'
'GCF_016728825.1'	'Pseudomonadota'	'Betaproteobacteria'	'Burkholderiales'	'Alcaligenaceae'	'Achromobacter'	'Achromobacter xylosoxidans'
'GCF_016728825.1'	'Pseudomonadota'	'Betaproteobacteria'	'Burkholderiales'	'Alcaligenaceae'	'Achromobacter'	'Achromobacter xylosoxidans'
'GCF_016728825.1'	'Pseudomonadota'	'Betaproteobacteria'	'Burkholderiales'	'Alcaligenaceae'	'Achromobacter'	'Achromobacter xylosoxidans'
'GCF_016728825.1'	'Pseudomonadota'	'Betaproteobacteria'	'Burkholderiales'	'Alcaligenaceae'	'Achromobacter'	'Achromobacter xylosoxidans'
'GCF_016728825.1'	'Pseudomonadota'	'Betaproteobacteria'	'Burkholderiales'	'Alcaligenaceae'	'Achromobacter'	'Achromobacter xylosoxidans'
'GCF_016728825.1'	'Pseudomonadota'	'Betaproteobacteria'	'Burkholderiales'	'Alcaligenaceae'	'Achromobacter'	'Achromobacter xylosoxidans'
'GCF_016728825.1'	'Pseudomonadota'	'Betaproteobacteria'	'Burkholderiales'	'Alcaligenaceae'	'Achromobacter'	'Achromobacter xylosoxidans'
'GCF_016728825.1'	'Pseudomonadota'	'Betaproteobacteria'	'Burkholderiales'	'Alcaligenaceae'	'Achromobacter'	'Achromobacter xylosoxidans'
'GCF_016728825.1'	'Pseudomonadota'	'Betaproteobacteria'	'Burkholderiales'	'Alcaligenaceae'	'Achromobacter'	'Achromobacter xylosoxidans'
'GCF_016728825.1'	'Pseudomonadota'	'Betaproteobacteria'	'Burkholderiales'	'Alcaligenaceae'	'Achromobacter'	'Achromobacter xylosoxidans'
'GCF_016728825.1'	'Pseudomonadota'	'Betaproteobacteria'	'Burkholderiales'	'Alcaligenaceae'	'Achromobacter'	'Achromobacter xylosoxidans'
'GCF_016728825.1'	'Pseudomonadota'	'Betaproteobacteria'	'Burkholderiales'	'Alcaligenaceae'	'Achromobacter'	'Achromobacter xylosoxidans'
'GCF_009914215.1'	'Pseudomonadota'	'Alphaproteobacteria'	'Rhodospirillales'	'Acetobacteraceae'	'Acetobacter'	'Acetobacter pasteurianus'
'GCF_008245125.1'	'Pseudomonadota'	'Betaproteobacteria'	'Burkholderiales'	'Alcaligenaceae'	'Achromobacter'	'Achromobacter insolitus'
'GCF_008245125.1'	'Pseudomonadota'	'Betaproteobacteria'	'Burkholderiales'	'Alcaligenaceae'	'Achromobacter'	'Achromobacter insolitus'
'GCF_008245125.1'	'Pseudomonadota'	'Betaproteobacteria'	'Burkholderiales'	'Alcaligenaceae'	'Achromobacter'	'Achromobacter insolitus'
'GCF_008245125.1'	'Pseudomonadota'	'Betaproteobacteria'	'Burkholderiales'	'Alcaligenaceae'	'Achromobacter'	'Achromobacter insolitus'
'GCF_008245125.1'	'Pseudomonadota'	'Betaproteobacteria'	'Burkholderiales'	'Alcaligenaceae'	'Achromobacter'	'Achromobacter insolitus'
'GCF_008245125.1'	'Pseudomonadota'	'Betaproteobacteria'	'Burkholderiales'	'Alcaligenaceae'	'Achromobacter'	'Achromobacter insolitus'
'GCF_008245125.1'	'Pseudomonadota'	'Betaproteobacteria'	'Burkholderiales'	'Alcaligenaceae'	'Achromobacter'	'Achromobacter insolitus'
'GCF_008245125.1'	'Pseudomonadota'	'Betaproteobacteria'	'Burkholderiales'	'Alcaligenaceae'	'Achromobacter'	'Achromobacter insolitus'
'GCF_008245125.1'	'Pseudomonadota'	'Betaproteobacteria'	'Burkholderiales'	'Alcaligenaceae'	'Achromobacter'	'Achromobacter insolitus'
'GCF_008245125.1'	'Pseudomonadota'	'Betaproteobacteria'	'Burkholderiales'	'Alcaligenaceae'	'Achromobacter'	'Achromobacter insolitus'
'GCF_013267375.1'	'Pseudomonadota'	'Betaproteobacteria'	'Burkholderiales'	'Alcaligenaceae'	'Achromobacter'	'Achromobacter denitrificans'
'GCF_013267375.1'	'Pseudomonadota'	'Betaproteobacteria'	'Burkholderiales'	'Alcaligenaceae'	'Achromobacter'	'Achromobacter denitrificans'
'GCF_013267375.1'	'Pseudomonadota'	'Betaproteobacteria'	'Burkholderiales'	'Alcaligenaceae'	'Achromobacter'	'Achromobacter denitrificans'
'GCF_013267375.1'	'Pseudomonadota'	'Betaproteobacteria'	'Burkholderiales'	'Alcaligenaceae'	'Achromobacter'	'Achromobacter denitrificans'
'GCF_013267375.1'	'Pseudomonadota'	'Betaproteobacteria'	'Burkholderiales'	'Alcaligenaceae'	'Achromobacter'	'Achromobacter denitrificans'
'GCF_013267375.1'	'Pseudomonadota'	'Betaproteobacteria'	'Burkholderiales'	'Alcaligenaceae'	'Achromobacter'	'Achromobacter denitrificans'
'GCF_013267375.1'	'Pseudomonadota'	'Betaproteobacteria'	'Burkholderiales'	'Alcaligenaceae'	'Achromobacter'	'Achromobacter denitrificans'
'GCF_013267375.1'	'Pseudomonadota'	'Betaproteobacteria'	'Burkholderiales'	'Alcaligenaceae'	'Achromobacter'	'Achromobacter denitrificans'
'GCF_013267375.1'	'Pseudomonadota'	'Betaproteobacteria'	'Burkholderiales'	'Alcaligenaceae'	'Achromobacter'	'Achromobacter denitrificans'
'GCF_013267375.1'	'Pseudomonadota'	'Betaproteobacteria'	'Burkholderiales'	'Alcaligenaceae'	'Achromobacter'	'Achromobacter denitrificans'
'GCF_013267375.1'	'Pseudomonadota'	'Betaproteobacteria'	'Burkholderiales'	'Alcaligenaceae'	'Achromobacter'	'Achromobacter denitrificans'
'GCF_013267375.1'	'Pseudomonadota'	'Betaproteobacteria'	'Burkholderiales'	'Alcaligenaceae'	'Achromobacter'	'Achromobacter denitrificans'
'GCF_013267375.1'	'Pseudomonadota'	'Betaproteobacteria'	'Burkholderiales'	'Alcaligenaceae'	'Achromobacter'	'Achromobacter denitrificans'
'GCF_013267375.1'	'Pseudomonadota'	'Betaproteobacteria'	'Burkholderiales'	'Alcaligenaceae'	'Achromobacter'	'Achromobacter denitrificans'
'GCF_013267375.1'	'Pseudomonadota'	'Betaproteobacteria'	'Burkholderiales'	'Alcaligenaceae'	'Achromobacter'	'Achromobacter denitrificans'
'GCF_013267375.1'	'Pseudomonadota'	'Betaproteobacteria'	'Burkholderiales'	'Alcaligenaceae'	'Achromobacter'	'Achromobacter denitrificans'
'GCF_013267375.1'	'Pseudomonadota'	'Betaproteobacteria'	'Burkholderiales'	'Alcaligenaceae'	'Achromobacter'	'Achromobacter denitrificans'
'GCF_013267375.1'	'Pseudomonadota'	'Betaproteobacteria'	'Burkholderiales'	'Alcaligenaceae'	'Achromobacter'	'Achromobacter denitrificans'
'GCF_013267375.1'	'Pseudomonadota'	'Betaproteobacteria'	'Burkholderiales'	'Alcaligenaceae'	'Achromobacter'	'Achromobacter denitrificans'
'GCF_013267375.1'	'Pseudomonadota'	'Betaproteobacteria'	'Burkholderiales'	'Alcaligenaceae'	'Achromobacter'	'Achromobacter denitrificans'
'GCF_900636675.1'	'Pseudomonadota'	'Betaproteobacteria'	'Burkholderiales'	'Alcaligenaceae'	'Achromobacter'	'Achromobacter spanius'
'GCF_900636675.1'	'Pseudomonadota'	'Betaproteobacteria'	'Burkholderiales'	'Alcaligenaceae'	'Achromobacter'	'Achromobacter spanius'
'GCF_900636675.1'	'Pseudomonadota'	'Betaproteobacteria'	'Burkholderiales'	'Alcaligenaceae'	'Achromobacter'	'Achromobacter spanius'
'GCF_900636675.1'	'Pseudomonadota'	'Betaproteobacteria'	'Burkholderiales'	'Alcaligenaceae'	'Achromobacter'	'Achromobacter spanius'
'GCF_900636675.1'	'Pseudomonadota'	'Betaproteobacteria'	'Burkholderiales'	'Alcaligenaceae'	'Achromobacter'	'Achromobacter spanius'
'GCF_900636675.1'	'Pseudomonadota'	'Betaproteobacteria'	'Burkholderiales'	'Alcaligenaceae'	'Achromobacter'	'Achromobacter spanius'
'GCF_900636675.1'	'Pseudomonadota'	'Betaproteobacteria'	'Burkholderiales'	'Alcaligenaceae'	'Achromobacter'	'Achromobacter spanius'
'GCF_900636675.1'	'Pseudomonadota'	'Betaproteobacteria'	'Burkholderiales'	'Alcaligenaceae'	'Achromobacter'	'Achromobacter spanius'
'GCF_900636675.1'	'Pseudomonadota'	'Betaproteobacteria'	'Burkholderiales'	'Alcaligenaceae'	'Achromobacter'	'Achromobacter spanius'
'GCF_900636675.1'	'Pseudomonadota'	'Betaproteobacteria'	'Burkholderiales'	'Alcaligenaceae'	'Achromobacter'	'Achromobacter spanius'
'GCF_900636675.1'	'Pseudomonadota'	'Betaproteobacteria'	'Burkholderiales'	'Alcaligenaceae'	'Achromobacter'	'Achromobacter spanius'
'GCF_001499615.1'	'Pseudomonadota'	'Alphaproteobacteria'	'Rhodospirillales'	'Acetobacteraceae'	'Acetobacter'	'Acetobacter senegalensis'
'GCF_001499615.1'	'Pseudomonadota'	'Alphaproteobacteria'	'Rhodospirillales'	'Acetobacteraceae'	'Acetobacter'	'Acetobacter senegalensis'
'GCF_001499615.1'	'Pseudomonadota'	'Alphaproteobacteria'	'Rhodospirillales'	'Acetobacteraceae'	'Acetobacter'	'Acetobacter senegalensis'
'GCF_002173775.1'	'Pseudomonadota'	'Alphaproteobacteria'	'Rhodospirillales'	'Acetobacteraceae'	'Acetobacter'	'Acetobacter ascendens'
'GCF_002173775.1'	'Pseudomonadota'	'Alphaproteobacteria'	'Rhodospirillales'	'Acetobacteraceae'	'Acetobacter'	'Acetobacter ascendens'
'GCF_002173775.1'	'Pseudomonadota'	'Alphaproteobacteria'	'Rhodospirillales'	'Acetobacteraceae'	'Acetobacter'	'Acetobacter ascendens'
'GCF_002220195.1'	'Pseudomonadota'	'Alphaproteobacteria'	'Rhodospirillales'	'Acetobacteraceae'	'Acetobacter'	'Acetobacter oryzifermentans'
'GCF_002220195.1'	'Pseudomonadota'	'Alphaproteobacteria'	'Rhodospirillales'	'Acetobacteraceae'	'Acetobacter'	'Acetobacter oryzifermentans'
'GCF_002220195.1'	'Pseudomonadota'	'Alphaproteobacteria'	'Rhodospirillales'	'Acetobacteraceae'	'Acetobacter'	'Acetobacter oryzifermentans'
'GCF_002220195.1'	'Pseudomonadota'	'Alphaproteobacteria'	'Rhodospirillales'	'Acetobacteraceae'	'Acetobacter'	'Acetobacter oryzifermentans'
'GCF_022870085.1'	'Pseudomonadota'	'Betaproteobacteria'	'Burkholderiales'	'Alcaligenaceae'	'Achromobacter'	'Achromobacter xylosoxidans'
'GCF_022870085.1'	'Pseudomonadota'	'Betaproteobacteria'	'Burkholderiales'	'Alcaligenaceae'	'Achromobacter'	'Achromobacter xylosoxidans'
'GCF_022870085.1'	'Pseudomonadota'	'Betaproteobacteria'	'Burkholderiales'	'Alcaligenaceae'	'Achromobacter'	'Achromobacter xylosoxidans'
'GCF_022870085.1'	'Pseudomonadota'	'Betaproteobacteria'	'Burkholderiales'	'Alcaligenaceae'	'Achromobacter'	'Achromobacter xylosoxidans'
'GCF_022870085.1'	'Pseudomonadota'	'Betaproteobacteria'	'Burkholderiales'	'Alcaligenaceae'	'Achromobacter'	'Achromobacter xylosoxidans'
'GCF_022870085.1'	'Pseudomonadota'	'Betaproteobacteria'	'Burkholderiales'	'Alcaligenaceae'	'Achromobacter'	'Achromobacter xylosoxidans'
'GCF_022870085.1'	'Pseudomonadota'	'Betaproteobacteria'	'Burkholderiales'	'Alcaligenaceae'	'Achromobacter'	'Achromobacter xylosoxidans'
'GCF_022870085.1'	'Pseudomonadota'	'Betaproteobacteria'	'Burkholderiales'	'Alcaligenaceae'	'Achromobacter'	'Achromobacter xylosoxidans'
'GCF_022870085.1'	'Pseudomonadota'	'Betaproteobacteria'	'Burkholderiales'	'Alcaligenaceae'	'Achromobacter'	'Achromobacter xylosoxidans'
'GCF_022870085.1'	'Pseudomonadota'	'Betaproteobacteria'	'Burkholderiales'	'Alcaligenaceae'	'Achromobacter'	'Achromobacter xylosoxidans'
'GCF_022870085.1'	'Pseudomonadota'	'Betaproteobacteria'	'Burkholderiales'	'Alcaligenaceae'	'Achromobacter'	'Achromobacter xylosoxidans'
'GCF_022870085.1'	'Pseudomonadota'	'Betaproteobacteria'	'Burkholderiales'	'Alcaligenaceae'	'Achromobacter'	'Achromobacter xylosoxidans'
'GCF_022870085.1'	'Pseudomonadota'	'Betaproteobacteria'	'Burkholderiales'	'Alcaligenaceae'	'Achromobacter'	'Achromobacter xylosoxidans'
'GCF_022870085.1'	'Pseudomonadota'	'Betaproteobacteria'	'Burkholderiales'	'Alcaligenaceae'	'Achromobacter'	'Achromobacter xylosoxidans'
'GCF_022870085.1'	'Pseudomonadota'	'Betaproteobacteria'	'Burkholderiales'	'Alcaligenaceae'	'Achromobacter'	'Achromobacter xylosoxidans'
'GCF_022870085.1'	'Pseudomonadota'	'Betaproteobacteria'	'Burkholderiales'	'Alcaligenaceae'	'Achromobacter'	'Achromobacter xylosoxidans'
'GCF_022870085.1'	'Pseudomonadota'	'Betaproteobacteria'	'Burkholderiales'	'Alcaligenaceae'	'Achromobacter'	'Achromobacter xylosoxidans'
'GCF_022870085.1'	'Pseudomonadota'	'Betaproteobacteria'	'Burkholderiales'	'Alcaligenaceae'	'Achromobacter'	'Achromobacter xylosoxidans'
'GCF_022870085.1'	'Pseudomonadota'	'Betaproteobacteria'	'Burkholderiales'	'Alcaligenaceae'	'Achromobacter'	'Achromobacter xylosoxidans'
'GCF_022870085.1'	'Pseudomonadota'	'Betaproteobacteria'	'Burkholderiales'	'Alcaligenaceae'	'Achromobacter'	'Achromobacter xylosoxidans'
'GCF_001457475.1'	'Pseudomonadota'	'Betaproteobacteria'	'Burkholderiales'	'Alcaligenaceae'	'Achromobacter'	'Achromobacter xylosoxidans'
'GCF_001457475.1'	'Pseudomonadota'	'Betaproteobacteria'	'Burkholderiales'	'Alcaligenaceae'	'Achromobacter'	'Achromobacter xylosoxidans'
'GCF_001457475.1'	'Pseudomonadota'	'Betaproteobacteria'	'Burkholderiales'	'Alcaligenaceae'	'Achromobacter'	'Achromobacter xylosoxidans'
'GCF_001457475.1'	'Pseudomonadota'	'Betaproteobacteria'	'Burkholderiales'	'Alcaligenaceae'	'Achromobacter'	'Achromobacter xylosoxidans'
'GCF_001457475.1'	'Pseudomonadota'	'Betaproteobacteria'	'Burkholderiales'	'Alcaligenaceae'	'Achromobacter'	'Achromobacter xylosoxidans'
'GCF_001457475.1'	'Pseudomonadota'	'Betaproteobacteria'	'Burkholderiales'	'Alcaligenaceae'	'Achromobacter'	'Achromobacter xylosoxidans'
'GCF_001457475.1'	'Pseudomonadota'	'Betaproteobacteria'	'Burkholderiales'	'Alcaligenaceae'	'Achromobacter'	'Achromobacter xylosoxidans'
'GCF_001457475.1'	'Pseudomonadota'	'Betaproteobacteria'	'Burkholderiales'	'Alcaligenaceae'	'Achromobacter'	'Achromobacter xylosoxidans'
'GCF_001457475.1'	'Pseudomonadota'	'Betaproteobacteria'	'Burkholderiales'	'Alcaligenaceae'	'Achromobacter'	'Achromobacter xylosoxidans'
'GCF_001457475.1'	'Pseudomonadota'	'Betaproteobacteria'	'Burkholderiales'	'Alcaligenaceae'	'Achromobacter'	'Achromobacter xylosoxidans'
'GCF_001457475.1'	'Pseudomonadota'	'Betaproteobacteria'	'Burkholderiales'	'Alcaligenaceae'	'Achromobacter'	'Achromobacter xylosoxidans'
'GCF_001457475.1'	'Pseudomonadota'	'Betaproteobacteria'	'Burkholderiales'	'Alcaligenaceae'	'Achromobacter'	'Achromobacter xylosoxidans'
'GCF_001457475.1'	'Pseudomonadota'	'Betaproteobacteria'	'Burkholderiales'	'Alcaligenaceae'	'Achromobacter'	'Achromobacter xylosoxidans'
'GCF_001457475.1'	'Pseudomonadota'	'Betaproteobacteria'	'Burkholderiales'	'Alcaligenaceae'	'Achromobacter'	'Achromobacter xylosoxidans'
'GCF_001457475.1'	'Pseudomonadota'	'Betaproteobacteria'	'Burkholderiales'	'Alcaligenaceae'	'Achromobacter'	'Achromobacter xylosoxidans'
'GCF_001457475.1'	'Pseudomonadota'	'Betaproteobacteria'	'Burkholderiales'	'Alcaligenaceae'	'Achromobacter'	'Achromobacter xylosoxidans'
'GCF_001457475.1'	'Pseudomonadota'	'Betaproteobacteria'	'Burkholderiales'	'Alcaligenaceae'	'Achromobacter'	'Achromobacter xylosoxidans'
'GCF_001457475.1'	'Pseudomonadota'	'Betaproteobacteria'	'Burkholderiales'	'Alcaligenaceae'	'Achromobacter'	'Achromobacter xylosoxidans'
'GCF_001457475.1'	'Pseudomonadota'	'Betaproteobacteria'	'Burkholderiales'	'Alcaligenaceae'	'Achromobacter'	'Achromobacter xylosoxidans'
'GCF_001457475.1'	'Pseudomonadota'	'Betaproteobacteria'	'Burkholderiales'	'Alcaligenaceae'	'Achromobacter'	'Achromobacter xylosoxidans'
'GCF_013343135.1'	'Pseudomonadota'	'Betaproteobacteria'	'Burkholderiales'	'Alcaligenaceae'	'Achromobacter'	'Achromobacter xylosoxidans'
'GCF_013343135.1'	'Pseudomonadota'	'Betaproteobacteria'	'Burkholderiales'	'Alcaligenaceae'	'Achromobacter'	'Achromobacter xylosoxidans'
'GCF_013343135.1'	'Pseudomonadota'	'Betaproteobacteria'	'Burkholderiales'	'Alcaligenaceae'	'Achromobacter'	'Achromobacter xylosoxidans'
'GCF_013343135.1'	'Pseudomonadota'	'Betaproteobacteria'	'Burkholderiales'	'Alcaligenaceae'	'Achromobacter'	'Achromobacter xylosoxidans'
'GCF_013343135.1'	'Pseudomonadota'	'Betaproteobacteria'	'Burkholderiales'	'Alcaligenaceae'	'Achromobacter'	'Achromobacter xylosoxidans'
'GCF_013343135.1'	'Pseudomonadota'	'Betaproteobacteria'	'Burkholderiales'	'Alcaligenaceae'	'Achromobacter'	'Achromobacter xylosoxidans'
'GCF_013343135.1'	'Pseudomonadota'	'Betaproteobacteria'	'Burkholderiales'	'Alcaligenaceae'	'Achromobacter'	'Achromobacter xylosoxidans'
'GCF_013343135.1'	'Pseudomonadota'	'Betaproteobacteria'	'Burkholderiales'	'Alcaligenaceae'	'Achromobacter'	'Achromobacter xylosoxidans'
'GCF_013343135.1'	'Pseudomonadota'	'Betaproteobacteria'	'Burkholderiales'	'Alcaligenaceae'	'Achromobacter'	'Achromobacter xylosoxidans'
'GCF_013343135.1'	'Pseudomonadota'	'Betaproteobacteria'	'Burkholderiales'	'Alcaligenaceae'	'Achromobacter'	'Achromobacter xylosoxidans'
'GCF_013343135.1'	'Pseudomonadota'	'Betaproteobacteria'	'Burkholderiales'	'Alcaligenaceae'	'Achromobacter'	'Achromobacter xylosoxidans'
'GCF_013343135.1'	'Pseudomonadota'	'Betaproteobacteria'	'Burkholderiales'	'Alcaligenaceae'	'Achromobacter'	'Achromobacter xylosoxidans'
'GCF_013343135.1'	'Pseudomonadota'	'Betaproteobacteria'	'Burkholderiales'	'Alcaligenaceae'	'Achromobacter'	'Achromobacter xylosoxidans'
'GCF_013343135.1'	'Pseudomonadota'	'Betaproteobacteria'	'Burkholderiales'	'Alcaligenaceae'	'Achromobacter'	'Achromobacter xylosoxidans'
'GCF_013343135.1'	'Pseudomonadota'	'Betaproteobacteria'	'Burkholderiales'	'Alcaligenaceae'	'Achromobacter'	'Achromobacter xylosoxidans'
'GCF_013343135.1'	'Pseudomonadota'	'Betaproteobacteria'	'Burkholderiales'	'Alcaligenaceae'	'Achromobacter'	'Achromobacter xylosoxidans'
'GCF_013343135.1'	'Pseudomonadota'	'Betaproteobacteria'	'Burkholderiales'	'Alcaligenaceae'	'Achromobacter'	'Achromobacter xylosoxidans'
'GCF_013343135.1'	'Pseudomonadota'	'Betaproteobacteria'	'Burkholderiales'	'Alcaligenaceae'	'Achromobacter'	'Achromobacter xylosoxidans'
'GCF_013343135.1'	'Pseudomonadota'	'Betaproteobacteria'	'Burkholderiales'	'Alcaligenaceae'	'Achromobacter'	'Achromobacter xylosoxidans'
'GCF_013343135.1'	'Pseudomonadota'	'Betaproteobacteria'	'Burkholderiales'	'Alcaligenaceae'	'Achromobacter'	'Achromobacter xylosoxidans'
'GCF_000193495.2'	'Pseudomonadota'	'Alphaproteobacteria'	'Rhodospirillales'	'Acetobacteraceae'	'Acetobacter'	'Acetobacter aceti'
'GCF_001971645.1'	'Pseudomonadota'	'Betaproteobacteria'	'Burkholderiales'	'Alcaligenaceae'	'Achromobacter'	'Achromobacter insolitus'
'GCF_001971645.1'	'Pseudomonadota'	'Betaproteobacteria'	'Burkholderiales'	'Alcaligenaceae'	'Achromobacter'	'Achromobacter insolitus'
'GCF_001971645.1'	'Pseudomonadota'	'Betaproteobacteria'	'Burkholderiales'	'Alcaligenaceae'	'Achromobacter'	'Achromobacter insolitus'
'GCF_001971645.1'	'Pseudomonadota'	'Betaproteobacteria'	'Burkholderiales'	'Alcaligenaceae'	'Achromobacter'	'Achromobacter insolitus'
'GCF_001971645.1'	'Pseudomonadota'	'Betaproteobacteria'	'Burkholderiales'	'Alcaligenaceae'	'Achromobacter'	'Achromobacter insolitus'
'GCF_001971645.1'	'Pseudomonadota'	'Betaproteobacteria'	'Burkholderiales'	'Alcaligenaceae'	'Achromobacter'	'Achromobacter insolitus'
'GCF_001971645.1'	'Pseudomonadota'	'Betaproteobacteria'	'Burkholderiales'	'Alcaligenaceae'	'Achromobacter'	'Achromobacter insolitus'
'GCF_001971645.1'	'Pseudomonadota'	'Betaproteobacteria'	'Burkholderiales'	'Alcaligenaceae'	'Achromobacter'	'Achromobacter insolitus'
'GCF_001971645.1'	'Pseudomonadota'	'Betaproteobacteria'	'Burkholderiales'	'Alcaligenaceae'	'Achromobacter'	'Achromobacter insolitus'
'GCF_001971645.1'	'Pseudomonadota'	'Betaproteobacteria'	'Burkholderiales'	'Alcaligenaceae'	'Achromobacter'	'Achromobacter insolitus'
'GCF_001971645.1'	'Pseudomonadota'	'Betaproteobacteria'	'Burkholderiales'	'Alcaligenaceae'	'Achromobacter'	'Achromobacter insolitus'
'GCF_001971645.1'	'Pseudomonadota'	'Betaproteobacteria'	'Burkholderiales'	'Alcaligenaceae'	'Achromobacter'	'Achromobacter insolitus'
'GCF_900637265.1'	'Pseudomonadota'	'Betaproteobacteria'	'Burkholderiales'	'Alcaligenaceae'	'Achromobacter'	'Achromobacter insolitus'
'GCF_900637265.1'	'Pseudomonadota'	'Betaproteobacteria'	'Burkholderiales'	'Alcaligenaceae'	'Achromobacter'	'Achromobacter insolitus'
'GCF_900637265.1'	'Pseudomonadota'	'Betaproteobacteria'	'Burkholderiales'	'Alcaligenaceae'	'Achromobacter'	'Achromobacter insolitus'
'GCF_900637265.1'	'Pseudomonadota'	'Betaproteobacteria'	'Burkholderiales'	'Alcaligenaceae'	'Achromobacter'	'Achromobacter insolitus'
'GCF_900637265.1'	'Pseudomonadota'	'Betaproteobacteria'	'Burkholderiales'	'Alcaligenaceae'	'Achromobacter'	'Achromobacter insolitus'
'GCF_900637265.1'	'Pseudomonadota'	'Betaproteobacteria'	'Burkholderiales'	'Alcaligenaceae'	'Achromobacter'	'Achromobacter insolitus'
'GCF_900637265.1'	'Pseudomonadota'	'Betaproteobacteria'	'Burkholderiales'	'Alcaligenaceae'	'Achromobacter'	'Achromobacter insolitus'
'GCF_900637265.1'	'Pseudomonadota'	'Betaproteobacteria'	'Burkholderiales'	'Alcaligenaceae'	'Achromobacter'	'Achromobacter insolitus'
'GCF_900637265.1'	'Pseudomonadota'	'Betaproteobacteria'	'Burkholderiales'	'Alcaligenaceae'	'Achromobacter'	'Achromobacter insolitus'
'GCF_900637265.1'	'Pseudomonadota'	'Betaproteobacteria'	'Burkholderiales'	'Alcaligenaceae'	'Achromobacter'	'Achromobacter insolitus'
'GCF_900637265.1'	'Pseudomonadota'	'Betaproteobacteria'	'Burkholderiales'	'Alcaligenaceae'	'Achromobacter'	'Achromobacter insolitus'
'GCF_900637265.1'	'Pseudomonadota'	'Betaproteobacteria'	'Burkholderiales'	'Alcaligenaceae'	'Achromobacter'	'Achromobacter insolitus'
'GCF_013267395.1'	'Pseudomonadota'	'Betaproteobacteria'	'Burkholderiales'	'Alcaligenaceae'	'Achromobacter'	'Achromobacter denitrificans'
'GCF_013267395.1'	'Pseudomonadota'	'Betaproteobacteria'	'Burkholderiales'	'Alcaligenaceae'	'Achromobacter'	'Achromobacter denitrificans'
'GCF_013267395.1'	'Pseudomonadota'	'Betaproteobacteria'	'Burkholderiales'	'Alcaligenaceae'	'Achromobacter'	'Achromobacter denitrificans'
'GCF_013267395.1'	'Pseudomonadota'	'Betaproteobacteria'	'Burkholderiales'	'Alcaligenaceae'	'Achromobacter'	'Achromobacter denitrificans'
'GCF_013267395.1'	'Pseudomonadota'	'Betaproteobacteria'	'Burkholderiales'	'Alcaligenaceae'	'Achromobacter'	'Achromobacter denitrificans'
'GCF_013267395.1'	'Pseudomonadota'	'Betaproteobacteria'	'Burkholderiales'	'Alcaligenaceae'	'Achromobacter'	'Achromobacter denitrificans'
'GCF_013267395.1'	'Pseudomonadota'	'Betaproteobacteria'	'Burkholderiales'	'Alcaligenaceae'	'Achromobacter'	'Achromobacter denitrificans'
'GCF_013267395.1'	'Pseudomonadota'	'Betaproteobacteria'	'Burkholderiales'	'Alcaligenaceae'	'Achromobacter'	'Achromobacter denitrificans'
'GCF_013267395.1'	'Pseudomonadota'	'Betaproteobacteria'	'Burkholderiales'	'Alcaligenaceae'	'Achromobacter'	'Achromobacter denitrificans'
'GCF_013267395.1'	'Pseudomonadota'	'Betaproteobacteria'	'Burkholderiales'	'Alcaligenaceae'	'Achromobacter'	'Achromobacter denitrificans'
'GCF_013267395.1'	'Pseudomonadota'	'Betaproteobacteria'	'Burkholderiales'	'Alcaligenaceae'	'Achromobacter'	'Achromobacter denitrificans'
'GCF_013267395.1'	'Pseudomonadota'	'Betaproteobacteria'	'Burkholderiales'	'Alcaligenaceae'	'Achromobacter'	'Achromobacter denitrificans'
'GCF_013267395.1'	'Pseudomonadota'	'Betaproteobacteria'	'Burkholderiales'	'Alcaligenaceae'	'Achromobacter'	'Achromobacter denitrificans'
'GCF_013267395.1'	'Pseudomonadota'	'Betaproteobacteria'	'Burkholderiales'	'Alcaligenaceae'	'Achromobacter'	'Achromobacter denitrificans'
'GCF_013267395.1'	'Pseudomonadota'	'Betaproteobacteria'	'Burkholderiales'	'Alcaligenaceae'	'Achromobacter'	'Achromobacter denitrificans'
'GCF_013267395.1'	'Pseudomonadota'	'Betaproteobacteria'	'Burkholderiales'	'Alcaligenaceae'	'Achromobacter'	'Achromobacter denitrificans'
'GCF_013267395.1'	'Pseudomonadota'	'Betaproteobacteria'	'Burkholderiales'	'Alcaligenaceae'	'Achromobacter'	'Achromobacter denitrificans'
'GCF_013267395.1'	'Pseudomonadota'	'Betaproteobacteria'	'Burkholderiales'	'Alcaligenaceae'	'Achromobacter'	'Achromobacter denitrificans'
'GCF_013267395.1'	'Pseudomonadota'	'Betaproteobacteria'	'Burkholderiales'	'Alcaligenaceae'	'Achromobacter'	'Achromobacter denitrificans'
'GCF_013267395.1'	'Pseudomonadota'	'Betaproteobacteria'	'Burkholderiales'	'Alcaligenaceae'	'Achromobacter'	'Achromobacter denitrificans'
'GCF_002812705.1'	'Pseudomonadota'	'Betaproteobacteria'	'Burkholderiales'	'Alcaligenaceae'	'Achromobacter'	'Achromobacter spanius'
'GCF_002812705.1'	'Pseudomonadota'	'Betaproteobacteria'	'Burkholderiales'	'Alcaligenaceae'	'Achromobacter'	'Achromobacter spanius'
'GCF_002812705.1'	'Pseudomonadota'	'Betaproteobacteria'	'Burkholderiales'	'Alcaligenaceae'	'Achromobacter'	'Achromobacter spanius'
'GCF_002812705.1'	'Pseudomonadota'	'Betaproteobacteria'	'Burkholderiales'	'Alcaligenaceae'	'Achromobacter'	'Achromobacter spanius'
'GCF_002812705.1'	'Pseudomonadota'	'Betaproteobacteria'	'Burkholderiales'	'Alcaligenaceae'	'Achromobacter'	'Achromobacter spanius'
'GCF_002812705.1'	'Pseudomonadota'	'Betaproteobacteria'	'Burkholderiales'	'Alcaligenaceae'	'Achromobacter'	'Achromobacter spanius'
'GCF_002812705.1'	'Pseudomonadota'	'Betaproteobacteria'	'Burkholderiales'	'Alcaligenaceae'	'Achromobacter'	'Achromobacter spanius'
'GCF_002812705.1'	'Pseudomonadota'	'Betaproteobacteria'	'Burkholderiales'	'Alcaligenaceae'	'Achromobacter'	'Achromobacter spanius'
'GCF_002812705.1'	'Pseudomonadota'	'Betaproteobacteria'	'Burkholderiales'	'Alcaligenaceae'	'Achromobacter'	'Achromobacter spanius'
'GCF_002812705.1'	'Pseudomonadota'	'Betaproteobacteria'	'Burkholderiales'	'Alcaligenaceae'	'Achromobacter'	'Achromobacter spanius'
'GCF_002812705.1'	'Pseudomonadota'	'Betaproteobacteria'	'Burkholderiales'	'Alcaligenaceae'	'Achromobacter'	'Achromobacter spanius'
'GCF_001766235.1'	'Pseudomonadota'	'Alphaproteobacteria'	'Rhodospirillales'	'Acetobacteraceae'	'Acetobacter'	'Acetobacter ascendens'
'GCF_001628715.1'	'Pseudomonadota'	'Alphaproteobacteria'	'Rhodospirillales'	'Acetobacteraceae'	'Acetobacter'	'Acetobacter oryzifermentans'
'GCF_001628715.1'	'Pseudomonadota'	'Alphaproteobacteria'	'Rhodospirillales'	'Acetobacteraceae'	'Acetobacter'	'Acetobacter oryzifermentans'
'GCF_001628715.1'	'Pseudomonadota'	'Alphaproteobacteria'	'Rhodospirillales'	'Acetobacteraceae'	'Acetobacter'	'Acetobacter oryzifermentans'
'GCF_001558755.2'	'Pseudomonadota'	'Betaproteobacteria'	'Burkholderiales'	'Alcaligenaceae'	'Achromobacter'	'Achromobacter xylosoxidans'
'GCF_001558755.2'	'Pseudomonadota'	'Betaproteobacteria'	'Burkholderiales'	'Alcaligenaceae'	'Achromobacter'	'Achromobacter xylosoxidans'
'GCF_001558755.2'	'Pseudomonadota'	'Betaproteobacteria'	'Burkholderiales'	'Alcaligenaceae'	'Achromobacter'	'Achromobacter xylosoxidans'
'GCF_001558755.2'	'Pseudomonadota'	'Betaproteobacteria'	'Burkholderiales'	'Alcaligenaceae'	'Achromobacter'	'Achromobacter xylosoxidans'
'GCF_001558755.2'	'Pseudomonadota'	'Betaproteobacteria'	'Burkholderiales'	'Alcaligenaceae'	'Achromobacter'	'Achromobacter xylosoxidans'
'GCF_001558755.2'	'Pseudomonadota'	'Betaproteobacteria'	'Burkholderiales'	'Alcaligenaceae'	'Achromobacter'	'Achromobacter xylosoxidans'
'GCF_001558755.2'	'Pseudomonadota'	'Betaproteobacteria'	'Burkholderiales'	'Alcaligenaceae'	'Achromobacter'	'Achromobacter xylosoxidans'
'GCF_001558755.2'	'Pseudomonadota'	'Betaproteobacteria'	'Burkholderiales'	'Alcaligenaceae'	'Achromobacter'	'Achromobacter xylosoxidans'
'GCF_001558755.2'	'Pseudomonadota'	'Betaproteobacteria'	'Burkholderiales'	'Alcaligenaceae'	'Achromobacter'	'Achromobacter xylosoxidans'
'GCF_001558755.2'	'Pseudomonadota'	'Betaproteobacteria'	'Burkholderiales'	'Alcaligenaceae'	'Achromobacter'	'Achromobacter xylosoxidans'
'GCF_001558755.2'	'Pseudomonadota'	'Betaproteobacteria'	'Burkholderiales'	'Alcaligenaceae'	'Achromobacter'	'Achromobacter xylosoxidans'
'GCF_001558755.2'	'Pseudomonadota'	'Betaproteobacteria'	'Burkholderiales'	'Alcaligenaceae'	'Achromobacter'	'Achromobacter xylosoxidans'
'GCF_001558755.2'	'Pseudomonadota'	'Betaproteobacteria'	'Burkholderiales'	'Alcaligenaceae'	'Achromobacter'	'Achromobacter xylosoxidans'
'GCF_001558755.2'	'Pseudomonadota'	'Betaproteobacteria'	'Burkholderiales'	'Alcaligenaceae'	'Achromobacter'	'Achromobacter xylosoxidans'
'GCF_001558755.2'	'Pseudomonadota'	'Betaproteobacteria'	'Burkholderiales'	'Alcaligenaceae'	'Achromobacter'	'Achromobacter xylosoxidans'
'GCF_001558755.2'	'Pseudomonadota'	'Betaproteobacteria'	'Burkholderiales'	'Alcaligenaceae'	'Achromobacter'	'Achromobacter xylosoxidans'
'GCF_001558755.2'	'Pseudomonadota'	'Betaproteobacteria'	'Burkholderiales'	'Alcaligenaceae'	'Achromobacter'	'Achromobacter xylosoxidans'
'GCF_001558755.2'	'Pseudomonadota'	'Betaproteobacteria'	'Burkholderiales'	'Alcaligenaceae'	'Achromobacter'	'Achromobacter xylosoxidans'
'GCF_001558755.2'	'Pseudomonadota'	'Betaproteobacteria'	'Burkholderiales'	'Alcaligenaceae'	'Achromobacter'	'Achromobacter xylosoxidans'
'GCF_001558755.2'	'Pseudomonadota'	'Betaproteobacteria'	'Burkholderiales'	'Alcaligenaceae'	'Achromobacter'	'Achromobacter xylosoxidans'
'GCF_001558755.2'	'Pseudomonadota'	'Betaproteobacteria'	'Burkholderiales'	'Alcaligenaceae'	'Achromobacter'	'Achromobacter xylosoxidans'
'GCF_001558755.2'	'Pseudomonadota'	'Betaproteobacteria'	'Burkholderiales'	'Alcaligenaceae'	'Achromobacter'	'Achromobacter xylosoxidans'
'GCF_001558755.2'	'Pseudomonadota'	'Betaproteobacteria'	'Burkholderiales'	'Alcaligenaceae'	'Achromobacter'	'Achromobacter xylosoxidans'
'GCF_001558755.2'	'Pseudomonadota'	'Betaproteobacteria'	'Burkholderiales'	'Alcaligenaceae'	'Achromobacter'	'Achromobacter xylosoxidans'
'GCF_001558755.2'	'Pseudomonadota'	'Betaproteobacteria'	'Burkholderiales'	'Alcaligenaceae'	'Achromobacter'	'Achromobacter xylosoxidans'
'GCF_001558755.2'	'Pseudomonadota'	'Betaproteobacteria'	'Burkholderiales'	'Alcaligenaceae'	'Achromobacter'	'Achromobacter xylosoxidans'
'GCF_001558755.2'	'Pseudomonadota'	'Betaproteobacteria'	'Burkholderiales'	'Alcaligenaceae'	'Achromobacter'	'Achromobacter xylosoxidans'
'GCF_001558755.2'	'Pseudomonadota'	'Betaproteobacteria'	'Burkholderiales'	'Alcaligenaceae'	'Achromobacter'	'Achromobacter xylosoxidans'
'GCF_001558755.2'	'Pseudomonadota'	'Betaproteobacteria'	'Burkholderiales'	'Alcaligenaceae'	'Achromobacter'	'Achromobacter xylosoxidans'
'GCF_001558755.2'	'Pseudomonadota'	'Betaproteobacteria'	'Burkholderiales'	'Alcaligenaceae'	'Achromobacter'	'Achromobacter xylosoxidans'
'GCF_001558755.2'	'Pseudomonadota'	'Betaproteobacteria'	'Burkholderiales'	'Alcaligenaceae'	'Achromobacter'	'Achromobacter xylosoxidans'
'GCF_016027035.1'	'Pseudomonadota'	'Betaproteobacteria'	'Burkholderiales'	'Alcaligenaceae'	'Achromobacter'	'Achromobacter xylosoxidans'
'GCF_016027035.1'	'Pseudomonadota'	'Betaproteobacteria'	'Burkholderiales'	'Alcaligenaceae'	'Achromobacter'	'Achromobacter xylosoxidans'
'GCF_016027035.1'	'Pseudomonadota'	'Betaproteobacteria'	'Burkholderiales'	'Alcaligenaceae'	'Achromobacter'	'Achromobacter xylosoxidans'
'GCF_016027035.1'	'Pseudomonadota'	'Betaproteobacteria'	'Burkholderiales'	'Alcaligenaceae'	'Achromobacter'	'Achromobacter xylosoxidans'
'GCF_016027035.1'	'Pseudomonadota'	'Betaproteobacteria'	'Burkholderiales'	'Alcaligenaceae'	'Achromobacter'	'Achromobacter xylosoxidans'
'GCF_016027035.1'	'Pseudomonadota'	'Betaproteobacteria'	'Burkholderiales'	'Alcaligenaceae'	'Achromobacter'	'Achromobacter xylosoxidans'
'GCF_016027035.1'	'Pseudomonadota'	'Betaproteobacteria'	'Burkholderiales'	'Alcaligenaceae'	'Achromobacter'	'Achromobacter xylosoxidans'
'GCF_016027035.1'	'Pseudomonadota'	'Betaproteobacteria'	'Burkholderiales'	'Alcaligenaceae'	'Achromobacter'	'Achromobacter xylosoxidans'
'GCF_016027035.1'	'Pseudomonadota'	'Betaproteobacteria'	'Burkholderiales'	'Alcaligenaceae'	'Achromobacter'	'Achromobacter xylosoxidans'
'GCF_016027035.1'	'Pseudomonadota'	'Betaproteobacteria'	'Burkholderiales'	'Alcaligenaceae'	'Achromobacter'	'Achromobacter xylosoxidans'
'GCF_016027035.1'	'Pseudomonadota'	'Betaproteobacteria'	'Burkholderiales'	'Alcaligenaceae'	'Achromobacter'	'Achromobacter xylosoxidans'
'GCF_016027035.1'	'Pseudomonadota'	'Betaproteobacteria'	'Burkholderiales'	'Alcaligenaceae'	'Achromobacter'	'Achromobacter xylosoxidans'
'GCF_016027035.1'	'Pseudomonadota'	'Betaproteobacteria'	'Burkholderiales'	'Alcaligenaceae'	'Achromobacter'	'Achromobacter xylosoxidans'
'GCF_016027035.1'	'Pseudomonadota'	'Betaproteobacteria'	'Burkholderiales'	'Alcaligenaceae'	'Achromobacter'	'Achromobacter xylosoxidans'
'GCF_016027035.1'	'Pseudomonadota'	'Betaproteobacteria'	'Burkholderiales'	'Alcaligenaceae'	'Achromobacter'	'Achromobacter xylosoxidans'
'GCF_016027035.1'	'Pseudomonadota'	'Betaproteobacteria'	'Burkholderiales'	'Alcaligenaceae'	'Achromobacter'	'Achromobacter xylosoxidans'
'GCF_016027035.1'	'Pseudomonadota'	'Betaproteobacteria'	'Burkholderiales'	'Alcaligenaceae'	'Achromobacter'	'Achromobacter xylosoxidans'
'GCF_016027035.1'	'Pseudomonadota'	'Betaproteobacteria'	'Burkholderiales'	'Alcaligenaceae'	'Achromobacter'	'Achromobacter xylosoxidans'
'GCF_016027035.1'	'Pseudomonadota'	'Betaproteobacteria'	'Burkholderiales'	'Alcaligenaceae'	'Achromobacter'	'Achromobacter xylosoxidans'
'GCF_016027035.1'	'Pseudomonadota'	'Betaproteobacteria'	'Burkholderiales'	'Alcaligenaceae'	'Achromobacter'	'Achromobacter xylosoxidans'
'GCF_014490035.1'	'Pseudomonadota'	'Betaproteobacteria'	'Burkholderiales'	'Alcaligenaceae'	'Achromobacter'	'Achromobacter xylosoxidans'
'GCF_014490035.1'	'Pseudomonadota'	'Betaproteobacteria'	'Burkholderiales'	'Alcaligenaceae'	'Achromobacter'	'Achromobacter xylosoxidans'
'GCF_014490035.1'	'Pseudomonadota'	'Betaproteobacteria'	'Burkholderiales'	'Alcaligenaceae'	'Achromobacter'	'Achromobacter xylosoxidans'
'GCF_014490035.1'	'Pseudomonadota'	'Betaproteobacteria'	'Burkholderiales'	'Alcaligenaceae'	'Achromobacter'	'Achromobacter xylosoxidans'
'GCF_014490035.1'	'Pseudomonadota'	'Betaproteobacteria'	'Burkholderiales'	'Alcaligenaceae'	'Achromobacter'	'Achromobacter xylosoxidans'
'GCF_014490035.1'	'Pseudomonadota'	'Betaproteobacteria'	'Burkholderiales'	'Alcaligenaceae'	'Achromobacter'	'Achromobacter xylosoxidans'
'GCF_014490035.1'	'Pseudomonadota'	'Betaproteobacteria'	'Burkholderiales'	'Alcaligenaceae'	'Achromobacter'	'Achromobacter xylosoxidans'
'GCF_014490035.1'	'Pseudomonadota'	'Betaproteobacteria'	'Burkholderiales'	'Alcaligenaceae'	'Achromobacter'	'Achromobacter xylosoxidans'
'GCF_014490035.1'	'Pseudomonadota'	'Betaproteobacteria'	'Burkholderiales'	'Alcaligenaceae'	'Achromobacter'	'Achromobacter xylosoxidans'
'GCF_014490035.1'	'Pseudomonadota'	'Betaproteobacteria'	'Burkholderiales'	'Alcaligenaceae'	'Achromobacter'	'Achromobacter xylosoxidans'
'GCF_014490035.1'	'Pseudomonadota'	'Betaproteobacteria'	'Burkholderiales'	'Alcaligenaceae'	'Achromobacter'	'Achromobacter xylosoxidans'
'GCF_900475575.1'	'Pseudomonadota'	'Betaproteobacteria'	'Burkholderiales'	'Alcaligenaceae'	'Achromobacter'	'Achromobacter xylosoxidans'
'GCF_900475575.1'	'Pseudomonadota'	'Betaproteobacteria'	'Burkholderiales'	'Alcaligenaceae'	'Achromobacter'	'Achromobacter xylosoxidans'
'GCF_900475575.1'	'Pseudomonadota'	'Betaproteobacteria'	'Burkholderiales'	'Alcaligenaceae'	'Achromobacter'	'Achromobacter xylosoxidans'
'GCF_900475575.1'	'Pseudomonadota'	'Betaproteobacteria'	'Burkholderiales'	'Alcaligenaceae'	'Achromobacter'	'Achromobacter xylosoxidans'
'GCF_900475575.1'	'Pseudomonadota'	'Betaproteobacteria'	'Burkholderiales'	'Alcaligenaceae'	'Achromobacter'	'Achromobacter xylosoxidans'
'GCF_900475575.1'	'Pseudomonadota'	'Betaproteobacteria'	'Burkholderiales'	'Alcaligenaceae'	'Achromobacter'	'Achromobacter xylosoxidans'
'GCF_900475575.1'	'Pseudomonadota'	'Betaproteobacteria'	'Burkholderiales'	'Alcaligenaceae'	'Achromobacter'	'Achromobacter xylosoxidans'
'GCF_900475575.1'	'Pseudomonadota'	'Betaproteobacteria'	'Burkholderiales'	'Alcaligenaceae'	'Achromobacter'	'Achromobacter xylosoxidans'
'GCF_900475575.1'	'Pseudomonadota'	'Betaproteobacteria'	'Burkholderiales'	'Alcaligenaceae'	'Achromobacter'	'Achromobacter xylosoxidans'
'GCF_900475575.1'	'Pseudomonadota'	'Betaproteobacteria'	'Burkholderiales'	'Alcaligenaceae'	'Achromobacter'	'Achromobacter xylosoxidans'
'GCF_900475575.1'	'Pseudomonadota'	'Betaproteobacteria'	'Burkholderiales'	'Alcaligenaceae'	'Achromobacter'	'Achromobacter xylosoxidans'
'GCF_900475575.1'	'Pseudomonadota'	'Betaproteobacteria'	'Burkholderiales'	'Alcaligenaceae'	'Achromobacter'	'Achromobacter xylosoxidans'
'GCF_900475575.1'	'Pseudomonadota'	'Betaproteobacteria'	'Burkholderiales'	'Alcaligenaceae'	'Achromobacter'	'Achromobacter xylosoxidans'
'GCF_900475575.1'	'Pseudomonadota'	'Betaproteobacteria'	'Burkholderiales'	'Alcaligenaceae'	'Achromobacter'	'Achromobacter xylosoxidans'
'GCF_900475575.1'	'Pseudomonadota'	'Betaproteobacteria'	'Burkholderiales'	'Alcaligenaceae'	'Achromobacter'	'Achromobacter xylosoxidans'
'GCF_900475575.1'	'Pseudomonadota'	'Betaproteobacteria'	'Burkholderiales'	'Alcaligenaceae'	'Achromobacter'	'Achromobacter xylosoxidans'
'GCF_900475575.1'	'Pseudomonadota'	'Betaproteobacteria'	'Burkholderiales'	'Alcaligenaceae'	'Achromobacter'	'Achromobacter xylosoxidans'
'GCF_900475575.1'	'Pseudomonadota'	'Betaproteobacteria'	'Burkholderiales'	'Alcaligenaceae'	'Achromobacter'	'Achromobacter xylosoxidans'
'GCF_900475575.1'	'Pseudomonadota'	'Betaproteobacteria'	'Burkholderiales'	'Alcaligenaceae'	'Achromobacter'	'Achromobacter xylosoxidans'
'GCF_900475575.1'	'Pseudomonadota'	'Betaproteobacteria'	'Burkholderiales'	'Alcaligenaceae'	'Achromobacter'	'Achromobacter xylosoxidans'
'GCF_900010105.1'	'Pseudomonadota'	'Betaproteobacteria'	'Burkholderiales'	'Alcaligenaceae'	'Achromobacter'	'Achromobacter xylosoxidans'
'GCF_900010105.1'	'Pseudomonadota'	'Betaproteobacteria'	'Burkholderiales'	'Alcaligenaceae'	'Achromobacter'	'Achromobacter xylosoxidans'
'GCF_900010105.1'	'Pseudomonadota'	'Betaproteobacteria'	'Burkholderiales'	'Alcaligenaceae'	'Achromobacter'	'Achromobacter xylosoxidans'
'GCF_900010105.1'	'Pseudomonadota'	'Betaproteobacteria'	'Burkholderiales'	'Alcaligenaceae'	'Achromobacter'	'Achromobacter xylosoxidans'
'GCF_900010105.1'	'Pseudomonadota'	'Betaproteobacteria'	'Burkholderiales'	'Alcaligenaceae'	'Achromobacter'	'Achromobacter xylosoxidans'
'GCF_900010105.1'	'Pseudomonadota'	'Betaproteobacteria'	'Burkholderiales'	'Alcaligenaceae'	'Achromobacter'	'Achromobacter xylosoxidans'
'GCF_900010105.1'	'Pseudomonadota'	'Betaproteobacteria'	'Burkholderiales'	'Alcaligenaceae'	'Achromobacter'	'Achromobacter xylosoxidans'
'GCF_900010105.1'	'Pseudomonadota'	'Betaproteobacteria'	'Burkholderiales'	'Alcaligenaceae'	'Achromobacter'	'Achromobacter xylosoxidans'
'GCF_900010105.1'	'Pseudomonadota'	'Betaproteobacteria'	'Burkholderiales'	'Alcaligenaceae'	'Achromobacter'	'Achromobacter xylosoxidans'
'GCF_900010105.1'	'Pseudomonadota'	'Betaproteobacteria'	'Burkholderiales'	'Alcaligenaceae'	'Achromobacter'	'Achromobacter xylosoxidans'
'GCF_900010105.1'	'Pseudomonadota'	'Betaproteobacteria'	'Burkholderiales'	'Alcaligenaceae'	'Achromobacter'	'Achromobacter xylosoxidans'
'GCF_900010105.1'	'Pseudomonadota'	'Betaproteobacteria'	'Burkholderiales'	'Alcaligenaceae'	'Achromobacter'	'Achromobacter xylosoxidans'
'GCF_900010105.1'	'Pseudomonadota'	'Betaproteobacteria'	'Burkholderiales'	'Alcaligenaceae'	'Achromobacter'	'Achromobacter xylosoxidans'
'GCF_900010105.1'	'Pseudomonadota'	'Betaproteobacteria'	'Burkholderiales'	'Alcaligenaceae'	'Achromobacter'	'Achromobacter xylosoxidans'
'GCF_900010105.1'	'Pseudomonadota'	'Betaproteobacteria'	'Burkholderiales'	'Alcaligenaceae'	'Achromobacter'	'Achromobacter xylosoxidans'
'GCF_900010105.1'	'Pseudomonadota'	'Betaproteobacteria'	'Burkholderiales'	'Alcaligenaceae'	'Achromobacter'	'Achromobacter xylosoxidans'
'GCF_900010105.1'	'Pseudomonadota'	'Betaproteobacteria'	'Burkholderiales'	'Alcaligenaceae'	'Achromobacter'	'Achromobacter xylosoxidans'
'GCF_900010105.1'	'Pseudomonadota'	'Betaproteobacteria'	'Burkholderiales'	'Alcaligenaceae'	'Achromobacter'	'Achromobacter xylosoxidans'
'GCF_900009125.1'	'Pseudomonadota'	'Betaproteobacteria'	'Burkholderiales'	'Alcaligenaceae'	'Achromobacter'	'Achromobacter xylosoxidans'
'GCF_900009125.1'	'Pseudomonadota'	'Betaproteobacteria'	'Burkholderiales'	'Alcaligenaceae'	'Achromobacter'	'Achromobacter xylosoxidans'
'GCF_900009125.1'	'Pseudomonadota'	'Betaproteobacteria'	'Burkholderiales'	'Alcaligenaceae'	'Achromobacter'	'Achromobacter xylosoxidans'
'GCF_900009125.1'	'Pseudomonadota'	'Betaproteobacteria'	'Burkholderiales'	'Alcaligenaceae'	'Achromobacter'	'Achromobacter xylosoxidans'
'GCF_900009125.1'	'Pseudomonadota'	'Betaproteobacteria'	'Burkholderiales'	'Alcaligenaceae'	'Achromobacter'	'Achromobacter xylosoxidans'
'GCF_900009125.1'	'Pseudomonadota'	'Betaproteobacteria'	'Burkholderiales'	'Alcaligenaceae'	'Achromobacter'	'Achromobacter xylosoxidans'
'GCF_900009125.1'	'Pseudomonadota'	'Betaproteobacteria'	'Burkholderiales'	'Alcaligenaceae'	'Achromobacter'	'Achromobacter xylosoxidans'
'GCF_900009125.1'	'Pseudomonadota'	'Betaproteobacteria'	'Burkholderiales'	'Alcaligenaceae'	'Achromobacter'	'Achromobacter xylosoxidans'
'GCF_900009125.1'	'Pseudomonadota'	'Betaproteobacteria'	'Burkholderiales'	'Alcaligenaceae'	'Achromobacter'	'Achromobacter xylosoxidans'
'GCF_900009125.1'	'Pseudomonadota'	'Betaproteobacteria'	'Burkholderiales'	'Alcaligenaceae'	'Achromobacter'	'Achromobacter xylosoxidans'
'GCF_900009125.1'	'Pseudomonadota'	'Betaproteobacteria'	'Burkholderiales'	'Alcaligenaceae'	'Achromobacter'	'Achromobacter xylosoxidans'
'GCF_900009125.1'	'Pseudomonadota'	'Betaproteobacteria'	'Burkholderiales'	'Alcaligenaceae'	'Achromobacter'	'Achromobacter xylosoxidans'
'GCF_900009125.1'	'Pseudomonadota'	'Betaproteobacteria'	'Burkholderiales'	'Alcaligenaceae'	'Achromobacter'	'Achromobacter xylosoxidans'
'GCF_900009125.1'	'Pseudomonadota'	'Betaproteobacteria'	'Burkholderiales'	'Alcaligenaceae'	'Achromobacter'	'Achromobacter xylosoxidans'
'GCF_900009125.1'	'Pseudomonadota'	'Betaproteobacteria'	'Burkholderiales'	'Alcaligenaceae'	'Achromobacter'	'Achromobacter xylosoxidans'
'GCF_900009125.1'	'Pseudomonadota'	'Betaproteobacteria'	'Burkholderiales'	'Alcaligenaceae'	'Achromobacter'	'Achromobacter xylosoxidans'
'GCF_900009125.1'	'Pseudomonadota'	'Betaproteobacteria'	'Burkholderiales'	'Alcaligenaceae'	'Achromobacter'	'Achromobacter xylosoxidans'
'GCF_900009125.1'	'Pseudomonadota'	'Betaproteobacteria'	'Burkholderiales'	'Alcaligenaceae'	'Achromobacter'	'Achromobacter xylosoxidans'
'GCF_900009125.1'	'Pseudomonadota'	'Betaproteobacteria'	'Burkholderiales'	'Alcaligenaceae'	'Achromobacter'	'Achromobacter xylosoxidans'
'GCF_900009125.1'	'Pseudomonadota'	'Betaproteobacteria'	'Burkholderiales'	'Alcaligenaceae'	'Achromobacter'	'Achromobacter xylosoxidans'
'GCF_900009125.1'	'Pseudomonadota'	'Betaproteobacteria'	'Burkholderiales'	'Alcaligenaceae'	'Achromobacter'	'Achromobacter xylosoxidans'
'GCF_900009125.1'	'Pseudomonadota'	'Betaproteobacteria'	'Burkholderiales'	'Alcaligenaceae'	'Achromobacter'	'Achromobacter xylosoxidans'
'GCF_025426095.1'	'Pseudomonadota'	'Betaproteobacteria'	'Burkholderiales'	'Alcaligenaceae'	'Achromobacter'	'Achromobacter xylosoxidans'
'GCF_025426095.1'	'Pseudomonadota'	'Betaproteobacteria'	'Burkholderiales'	'Alcaligenaceae'	'Achromobacter'	'Achromobacter xylosoxidans'
'GCF_025426095.1'	'Pseudomonadota'	'Betaproteobacteria'	'Burkholderiales'	'Alcaligenaceae'	'Achromobacter'	'Achromobacter xylosoxidans'
'GCF_025426095.1'	'Pseudomonadota'	'Betaproteobacteria'	'Burkholderiales'	'Alcaligenaceae'	'Achromobacter'	'Achromobacter xylosoxidans'
'GCF_025426095.1'	'Pseudomonadota'	'Betaproteobacteria'	'Burkholderiales'	'Alcaligenaceae'	'Achromobacter'	'Achromobacter xylosoxidans'
'GCF_025426095.1'	'Pseudomonadota'	'Betaproteobacteria'	'Burkholderiales'	'Alcaligenaceae'	'Achromobacter'	'Achromobacter xylosoxidans'
'GCF_025426095.1'	'Pseudomonadota'	'Betaproteobacteria'	'Burkholderiales'	'Alcaligenaceae'	'Achromobacter'	'Achromobacter xylosoxidans'
'GCF_025426095.1'	'Pseudomonadota'	'Betaproteobacteria'	'Burkholderiales'	'Alcaligenaceae'	'Achromobacter'	'Achromobacter xylosoxidans'
'GCF_025426095.1'	'Pseudomonadota'	'Betaproteobacteria'	'Burkholderiales'	'Alcaligenaceae'	'Achromobacter'	'Achromobacter xylosoxidans'
'GCF_025426095.1'	'Pseudomonadota'	'Betaproteobacteria'	'Burkholderiales'	'Alcaligenaceae'	'Achromobacter'	'Achromobacter xylosoxidans'
'GCF_025426095.1'	'Pseudomonadota'	'Betaproteobacteria'	'Burkholderiales'	'Alcaligenaceae'	'Achromobacter'	'Achromobacter xylosoxidans'
'GCF_025426095.1'	'Pseudomonadota'	'Betaproteobacteria'	'Burkholderiales'	'Alcaligenaceae'	'Achromobacter'	'Achromobacter xylosoxidans'
'GCF_025426095.1'	'Pseudomonadota'	'Betaproteobacteria'	'Burkholderiales'	'Alcaligenaceae'	'Achromobacter'	'Achromobacter xylosoxidans'
'GCF_025426095.1'	'Pseudomonadota'	'Betaproteobacteria'	'Burkholderiales'	'Alcaligenaceae'	'Achromobacter'	'Achromobacter xylosoxidans'
'GCF_025426095.1'	'Pseudomonadota'	'Betaproteobacteria'	'Burkholderiales'	'Alcaligenaceae'	'Achromobacter'	'Achromobacter xylosoxidans'
'GCF_025426095.1'	'Pseudomonadota'	'Betaproteobacteria'	'Burkholderiales'	'Alcaligenaceae'	'Achromobacter'	'Achromobacter xylosoxidans'
'GCF_025426095.1'	'Pseudomonadota'	'Betaproteobacteria'	'Burkholderiales'	'Alcaligenaceae'	'Achromobacter'	'Achromobacter xylosoxidans'
'GCF_013282255.1'	'Pseudomonadota'	'Betaproteobacteria'	'Burkholderiales'	'Alcaligenaceae'	'Achromobacter'	'Achromobacter xylosoxidans'
'GCF_013282255.1'	'Pseudomonadota'	'Betaproteobacteria'	'Burkholderiales'	'Alcaligenaceae'	'Achromobacter'	'Achromobacter xylosoxidans'
'GCF_013282255.1'	'Pseudomonadota'	'Betaproteobacteria'	'Burkholderiales'	'Alcaligenaceae'	'Achromobacter'	'Achromobacter xylosoxidans'
'GCF_013282255.1'	'Pseudomonadota'	'Betaproteobacteria'	'Burkholderiales'	'Alcaligenaceae'	'Achromobacter'	'Achromobacter xylosoxidans'
'GCF_013282255.1'	'Pseudomonadota'	'Betaproteobacteria'	'Burkholderiales'	'Alcaligenaceae'	'Achromobacter'	'Achromobacter xylosoxidans'
'GCF_013282255.1'	'Pseudomonadota'	'Betaproteobacteria'	'Burkholderiales'	'Alcaligenaceae'	'Achromobacter'	'Achromobacter xylosoxidans'
'GCF_013282255.1'	'Pseudomonadota'	'Betaproteobacteria'	'Burkholderiales'	'Alcaligenaceae'	'Achromobacter'	'Achromobacter xylosoxidans'
'GCF_013282255.1'	'Pseudomonadota'	'Betaproteobacteria'	'Burkholderiales'	'Alcaligenaceae'	'Achromobacter'	'Achromobacter xylosoxidans'
'GCF_013282255.1'	'Pseudomonadota'	'Betaproteobacteria'	'Burkholderiales'	'Alcaligenaceae'	'Achromobacter'	'Achromobacter xylosoxidans'
'GCF_013282255.1'	'Pseudomonadota'	'Betaproteobacteria'	'Burkholderiales'	'Alcaligenaceae'	'Achromobacter'	'Achromobacter xylosoxidans'
'GCF_013282255.1'	'Pseudomonadota'	'Betaproteobacteria'	'Burkholderiales'	'Alcaligenaceae'	'Achromobacter'	'Achromobacter xylosoxidans'
'GCF_013282255.1'	'Pseudomonadota'	'Betaproteobacteria'	'Burkholderiales'	'Alcaligenaceae'	'Achromobacter'	'Achromobacter xylosoxidans'
'GCF_013282255.1'	'Pseudomonadota'	'Betaproteobacteria'	'Burkholderiales'	'Alcaligenaceae'	'Achromobacter'	'Achromobacter xylosoxidans'
'GCF_013282255.1'	'Pseudomonadota'	'Betaproteobacteria'	'Burkholderiales'	'Alcaligenaceae'	'Achromobacter'	'Achromobacter xylosoxidans'
'GCF_013282255.1'	'Pseudomonadota'	'Betaproteobacteria'	'Burkholderiales'	'Alcaligenaceae'	'Achromobacter'	'Achromobacter xylosoxidans'
'GCF_013282255.1'	'Pseudomonadota'	'Betaproteobacteria'	'Burkholderiales'	'Alcaligenaceae'	'Achromobacter'	'Achromobacter xylosoxidans'
'GCF_013282255.1'	'Pseudomonadota'	'Betaproteobacteria'	'Burkholderiales'	'Alcaligenaceae'	'Achromobacter'	'Achromobacter xylosoxidans'
'GCF_001558915.1'	'Pseudomonadota'	'Betaproteobacteria'	'Burkholderiales'	'Alcaligenaceae'	'Achromobacter'	'Achromobacter xylosoxidans'
'GCF_001558915.1'	'Pseudomonadota'	'Betaproteobacteria'	'Burkholderiales'	'Alcaligenaceae'	'Achromobacter'	'Achromobacter xylosoxidans'
'GCF_001558915.1'	'Pseudomonadota'	'Betaproteobacteria'	'Burkholderiales'	'Alcaligenaceae'	'Achromobacter'	'Achromobacter xylosoxidans'
'GCF_001558915.1'	'Pseudomonadota'	'Betaproteobacteria'	'Burkholderiales'	'Alcaligenaceae'	'Achromobacter'	'Achromobacter xylosoxidans'
'GCF_001558915.1'	'Pseudomonadota'	'Betaproteobacteria'	'Burkholderiales'	'Alcaligenaceae'	'Achromobacter'	'Achromobacter xylosoxidans'
'GCF_001558915.1'	'Pseudomonadota'	'Betaproteobacteria'	'Burkholderiales'	'Alcaligenaceae'	'Achromobacter'	'Achromobacter xylosoxidans'
'GCF_001558915.1'	'Pseudomonadota'	'Betaproteobacteria'	'Burkholderiales'	'Alcaligenaceae'	'Achromobacter'	'Achromobacter xylosoxidans'
'GCF_001558915.1'	'Pseudomonadota'	'Betaproteobacteria'	'Burkholderiales'	'Alcaligenaceae'	'Achromobacter'	'Achromobacter xylosoxidans'
'GCF_001558915.1'	'Pseudomonadota'	'Betaproteobacteria'	'Burkholderiales'	'Alcaligenaceae'	'Achromobacter'	'Achromobacter xylosoxidans'
'GCF_001558915.1'	'Pseudomonadota'	'Betaproteobacteria'	'Burkholderiales'	'Alcaligenaceae'	'Achromobacter'	'Achromobacter xylosoxidans'
'GCF_001558915.1'	'Pseudomonadota'	'Betaproteobacteria'	'Burkholderiales'	'Alcaligenaceae'	'Achromobacter'	'Achromobacter xylosoxidans'
'GCF_001558915.1'	'Pseudomonadota'	'Betaproteobacteria'	'Burkholderiales'	'Alcaligenaceae'	'Achromobacter'	'Achromobacter xylosoxidans'
'GCF_001558915.1'	'Pseudomonadota'	'Betaproteobacteria'	'Burkholderiales'	'Alcaligenaceae'	'Achromobacter'	'Achromobacter xylosoxidans'
'GCF_900009115.1'	'Pseudomonadota'	'Betaproteobacteria'	'Burkholderiales'	'Alcaligenaceae'	'Achromobacter'	'Achromobacter xylosoxidans'
'GCF_900009115.1'	'Pseudomonadota'	'Betaproteobacteria'	'Burkholderiales'	'Alcaligenaceae'	'Achromobacter'	'Achromobacter xylosoxidans'
'GCF_900009115.1'	'Pseudomonadota'	'Betaproteobacteria'	'Burkholderiales'	'Alcaligenaceae'	'Achromobacter'	'Achromobacter xylosoxidans'
'GCF_900009115.1'	'Pseudomonadota'	'Betaproteobacteria'	'Burkholderiales'	'Alcaligenaceae'	'Achromobacter'	'Achromobacter xylosoxidans'
'GCF_900009115.1'	'Pseudomonadota'	'Betaproteobacteria'	'Burkholderiales'	'Alcaligenaceae'	'Achromobacter'	'Achromobacter xylosoxidans'
'GCF_900009115.1'	'Pseudomonadota'	'Betaproteobacteria'	'Burkholderiales'	'Alcaligenaceae'	'Achromobacter'	'Achromobacter xylosoxidans'
'GCF_900009115.1'	'Pseudomonadota'	'Betaproteobacteria'	'Burkholderiales'	'Alcaligenaceae'	'Achromobacter'	'Achromobacter xylosoxidans'
'GCF_900009115.1'	'Pseudomonadota'	'Betaproteobacteria'	'Burkholderiales'	'Alcaligenaceae'	'Achromobacter'	'Achromobacter xylosoxidans'
'GCF_900009115.1'	'Pseudomonadota'	'Betaproteobacteria'	'Burkholderiales'	'Alcaligenaceae'	'Achromobacter'	'Achromobacter xylosoxidans'
'GCF_900009115.1'	'Pseudomonadota'	'Betaproteobacteria'	'Burkholderiales'	'Alcaligenaceae'	'Achromobacter'	'Achromobacter xylosoxidans'
'GCF_900009115.1'	'Pseudomonadota'	'Betaproteobacteria'	'Burkholderiales'	'Alcaligenaceae'	'Achromobacter'	'Achromobacter xylosoxidans'
'GCF_900009115.1'	'Pseudomonadota'	'Betaproteobacteria'	'Burkholderiales'	'Alcaligenaceae'	'Achromobacter'	'Achromobacter xylosoxidans'
'GCF_900009115.1'	'Pseudomonadota'	'Betaproteobacteria'	'Burkholderiales'	'Alcaligenaceae'	'Achromobacter'	'Achromobacter xylosoxidans'
'GCF_900009115.1'	'Pseudomonadota'	'Betaproteobacteria'	'Burkholderiales'	'Alcaligenaceae'	'Achromobacter'	'Achromobacter xylosoxidans'
'GCF_900009115.1'	'Pseudomonadota'	'Betaproteobacteria'	'Burkholderiales'	'Alcaligenaceae'	'Achromobacter'	'Achromobacter xylosoxidans'
'GCF_900009115.1'	'Pseudomonadota'	'Betaproteobacteria'	'Burkholderiales'	'Alcaligenaceae'	'Achromobacter'	'Achromobacter xylosoxidans'
'GCF_013282235.1'	'Pseudomonadota'	'Betaproteobacteria'	'Burkholderiales'	'Alcaligenaceae'	'Achromobacter'	'Achromobacter xylosoxidans'
'GCF_013282235.1'	'Pseudomonadota'	'Betaproteobacteria'	'Burkholderiales'	'Alcaligenaceae'	'Achromobacter'	'Achromobacter xylosoxidans'
'GCF_013282235.1'	'Pseudomonadota'	'Betaproteobacteria'	'Burkholderiales'	'Alcaligenaceae'	'Achromobacter'	'Achromobacter xylosoxidans'
'GCF_013282235.1'	'Pseudomonadota'	'Betaproteobacteria'	'Burkholderiales'	'Alcaligenaceae'	'Achromobacter'	'Achromobacter xylosoxidans'
'GCF_013282235.1'	'Pseudomonadota'	'Betaproteobacteria'	'Burkholderiales'	'Alcaligenaceae'	'Achromobacter'	'Achromobacter xylosoxidans'
'GCF_013282235.1'	'Pseudomonadota'	'Betaproteobacteria'	'Burkholderiales'	'Alcaligenaceae'	'Achromobacter'	'Achromobacter xylosoxidans'
'GCF_013282235.1'	'Pseudomonadota'	'Betaproteobacteria'	'Burkholderiales'	'Alcaligenaceae'	'Achromobacter'	'Achromobacter xylosoxidans'
'GCF_013282235.1'	'Pseudomonadota'	'Betaproteobacteria'	'Burkholderiales'	'Alcaligenaceae'	'Achromobacter'	'Achromobacter xylosoxidans'
'GCF_013282235.1'	'Pseudomonadota'	'Betaproteobacteria'	'Burkholderiales'	'Alcaligenaceae'	'Achromobacter'	'Achromobacter xylosoxidans'
'GCF_013282235.1'	'Pseudomonadota'	'Betaproteobacteria'	'Burkholderiales'	'Alcaligenaceae'	'Achromobacter'	'Achromobacter xylosoxidans'
'GCF_013282235.1'	'Pseudomonadota'	'Betaproteobacteria'	'Burkholderiales'	'Alcaligenaceae'	'Achromobacter'	'Achromobacter xylosoxidans'
'GCF_013282235.1'	'Pseudomonadota'	'Betaproteobacteria'	'Burkholderiales'	'Alcaligenaceae'	'Achromobacter'	'Achromobacter xylosoxidans'
'GCF_013282235.1'	'Pseudomonadota'	'Betaproteobacteria'	'Burkholderiales'	'Alcaligenaceae'	'Achromobacter'	'Achromobacter xylosoxidans'
'GCF_013282235.1'	'Pseudomonadota'	'Betaproteobacteria'	'Burkholderiales'	'Alcaligenaceae'	'Achromobacter'	'Achromobacter xylosoxidans'
'GCF_013282235.1'	'Pseudomonadota'	'Betaproteobacteria'	'Burkholderiales'	'Alcaligenaceae'	'Achromobacter'	'Achromobacter xylosoxidans'
'GCF_013282235.1'	'Pseudomonadota'	'Betaproteobacteria'	'Burkholderiales'	'Alcaligenaceae'	'Achromobacter'	'Achromobacter xylosoxidans'
'GCF_013282235.1'	'Pseudomonadota'	'Betaproteobacteria'	'Burkholderiales'	'Alcaligenaceae'	'Achromobacter'	'Achromobacter xylosoxidans'
'GCF_008432465.1'	'Pseudomonadota'	'Betaproteobacteria'	'Burkholderiales'	'Alcaligenaceae'	'Achromobacter'	'Achromobacter xylosoxidans'
'GCF_008432465.1'	'Pseudomonadota'	'Betaproteobacteria'	'Burkholderiales'	'Alcaligenaceae'	'Achromobacter'	'Achromobacter xylosoxidans'
'GCF_008432465.1'	'Pseudomonadota'	'Betaproteobacteria'	'Burkholderiales'	'Alcaligenaceae'	'Achromobacter'	'Achromobacter xylosoxidans'
'GCF_008432465.1'	'Pseudomonadota'	'Betaproteobacteria'	'Burkholderiales'	'Alcaligenaceae'	'Achromobacter'	'Achromobacter xylosoxidans'
'GCF_008432465.1'	'Pseudomonadota'	'Betaproteobacteria'	'Burkholderiales'	'Alcaligenaceae'	'Achromobacter'	'Achromobacter xylosoxidans'
'GCF_008432465.1'	'Pseudomonadota'	'Betaproteobacteria'	'Burkholderiales'	'Alcaligenaceae'	'Achromobacter'	'Achromobacter xylosoxidans'
'GCF_008432465.1'	'Pseudomonadota'	'Betaproteobacteria'	'Burkholderiales'	'Alcaligenaceae'	'Achromobacter'	'Achromobacter xylosoxidans'
'GCF_008432465.1'	'Pseudomonadota'	'Betaproteobacteria'	'Burkholderiales'	'Alcaligenaceae'	'Achromobacter'	'Achromobacter xylosoxidans'
'GCF_008432465.1'	'Pseudomonadota'	'Betaproteobacteria'	'Burkholderiales'	'Alcaligenaceae'	'Achromobacter'	'Achromobacter xylosoxidans'
'GCF_008432465.1'	'Pseudomonadota'	'Betaproteobacteria'	'Burkholderiales'	'Alcaligenaceae'	'Achromobacter'	'Achromobacter xylosoxidans'
'GCF_008432465.1'	'Pseudomonadota'	'Betaproteobacteria'	'Burkholderiales'	'Alcaligenaceae'	'Achromobacter'	'Achromobacter xylosoxidans'
'GCF_008432465.1'	'Pseudomonadota'	'Betaproteobacteria'	'Burkholderiales'	'Alcaligenaceae'	'Achromobacter'	'Achromobacter xylosoxidans'
'GCF_008432465.1'	'Pseudomonadota'	'Betaproteobacteria'	'Burkholderiales'	'Alcaligenaceae'	'Achromobacter'	'Achromobacter xylosoxidans'
'GCF_008432465.1'	'Pseudomonadota'	'Betaproteobacteria'	'Burkholderiales'	'Alcaligenaceae'	'Achromobacter'	'Achromobacter xylosoxidans'
'GCF_008432465.1'	'Pseudomonadota'	'Betaproteobacteria'	'Burkholderiales'	'Alcaligenaceae'	'Achromobacter'	'Achromobacter xylosoxidans'
'GCF_008432465.1'	'Pseudomonadota'	'Betaproteobacteria'	'Burkholderiales'	'Alcaligenaceae'	'Achromobacter'	'Achromobacter xylosoxidans'
'GCF_001559195.1'	'Pseudomonadota'	'Betaproteobacteria'	'Burkholderiales'	'Alcaligenaceae'	'Achromobacter'	'Achromobacter xylosoxidans'
'GCF_001559195.1'	'Pseudomonadota'	'Betaproteobacteria'	'Burkholderiales'	'Alcaligenaceae'	'Achromobacter'	'Achromobacter xylosoxidans'
'GCF_001559195.1'	'Pseudomonadota'	'Betaproteobacteria'	'Burkholderiales'	'Alcaligenaceae'	'Achromobacter'	'Achromobacter xylosoxidans'
'GCF_001559195.1'	'Pseudomonadota'	'Betaproteobacteria'	'Burkholderiales'	'Alcaligenaceae'	'Achromobacter'	'Achromobacter xylosoxidans'
'GCF_001559195.1'	'Pseudomonadota'	'Betaproteobacteria'	'Burkholderiales'	'Alcaligenaceae'	'Achromobacter'	'Achromobacter xylosoxidans'
'GCF_001559195.1'	'Pseudomonadota'	'Betaproteobacteria'	'Burkholderiales'	'Alcaligenaceae'	'Achromobacter'	'Achromobacter xylosoxidans'
'GCF_001559195.1'	'Pseudomonadota'	'Betaproteobacteria'	'Burkholderiales'	'Alcaligenaceae'	'Achromobacter'	'Achromobacter xylosoxidans'
'GCF_001559195.1'	'Pseudomonadota'	'Betaproteobacteria'	'Burkholderiales'	'Alcaligenaceae'	'Achromobacter'	'Achromobacter xylosoxidans'
'GCF_001559195.1'	'Pseudomonadota'	'Betaproteobacteria'	'Burkholderiales'	'Alcaligenaceae'	'Achromobacter'	'Achromobacter xylosoxidans'
'GCF_001559195.1'	'Pseudomonadota'	'Betaproteobacteria'	'Burkholderiales'	'Alcaligenaceae'	'Achromobacter'	'Achromobacter xylosoxidans'
'GCF_001559195.1'	'Pseudomonadota'	'Betaproteobacteria'	'Burkholderiales'	'Alcaligenaceae'	'Achromobacter'	'Achromobacter xylosoxidans'
'GCF_001559195.1'	'Pseudomonadota'	'Betaproteobacteria'	'Burkholderiales'	'Alcaligenaceae'	'Achromobacter'	'Achromobacter xylosoxidans'
'GCF_001559195.1'	'Pseudomonadota'	'Betaproteobacteria'	'Burkholderiales'	'Alcaligenaceae'	'Achromobacter'	'Achromobacter xylosoxidans'
'GCF_001559195.1'	'Pseudomonadota'	'Betaproteobacteria'	'Burkholderiales'	'Alcaligenaceae'	'Achromobacter'	'Achromobacter xylosoxidans'
'GCF_001559195.1'	'Pseudomonadota'	'Betaproteobacteria'	'Burkholderiales'	'Alcaligenaceae'	'Achromobacter'	'Achromobacter xylosoxidans'
'GCF_001559195.1'	'Pseudomonadota'	'Betaproteobacteria'	'Burkholderiales'	'Alcaligenaceae'	'Achromobacter'	'Achromobacter xylosoxidans'
'GCF_001559195.1'	'Pseudomonadota'	'Betaproteobacteria'	'Burkholderiales'	'Alcaligenaceae'	'Achromobacter'	'Achromobacter xylosoxidans'
'GCF_009363015.1'	'Pseudomonadota'	'Betaproteobacteria'	'Burkholderiales'	'Alcaligenaceae'	'Achromobacter'	'Achromobacter xylosoxidans'
'GCF_009363015.1'	'Pseudomonadota'	'Betaproteobacteria'	'Burkholderiales'	'Alcaligenaceae'	'Achromobacter'	'Achromobacter xylosoxidans'
'GCF_009363015.1'	'Pseudomonadota'	'Betaproteobacteria'	'Burkholderiales'	'Alcaligenaceae'	'Achromobacter'	'Achromobacter xylosoxidans'
'GCF_009363015.1'	'Pseudomonadota'	'Betaproteobacteria'	'Burkholderiales'	'Alcaligenaceae'	'Achromobacter'	'Achromobacter xylosoxidans'
'GCF_009363015.1'	'Pseudomonadota'	'Betaproteobacteria'	'Burkholderiales'	'Alcaligenaceae'	'Achromobacter'	'Achromobacter xylosoxidans'
'GCF_009363015.1'	'Pseudomonadota'	'Betaproteobacteria'	'Burkholderiales'	'Alcaligenaceae'	'Achromobacter'	'Achromobacter xylosoxidans'
'GCF_001051055.1'	'Pseudomonadota'	'Betaproteobacteria'	'Burkholderiales'	'Alcaligenaceae'	'Achromobacter'	'Achromobacter xylosoxidans'
'GCF_001051055.1'	'Pseudomonadota'	'Betaproteobacteria'	'Burkholderiales'	'Alcaligenaceae'	'Achromobacter'	'Achromobacter xylosoxidans'
'GCF_001051055.1'	'Pseudomonadota'	'Betaproteobacteria'	'Burkholderiales'	'Alcaligenaceae'	'Achromobacter'	'Achromobacter xylosoxidans'
'GCF_001051055.1'	'Pseudomonadota'	'Betaproteobacteria'	'Burkholderiales'	'Alcaligenaceae'	'Achromobacter'	'Achromobacter xylosoxidans'
'GCF_001051055.1'	'Pseudomonadota'	'Betaproteobacteria'	'Burkholderiales'	'Alcaligenaceae'	'Achromobacter'	'Achromobacter xylosoxidans'
'GCF_001051055.1'	'Pseudomonadota'	'Betaproteobacteria'	'Burkholderiales'	'Alcaligenaceae'	'Achromobacter'	'Achromobacter xylosoxidans'
'GCF_001051055.1'	'Pseudomonadota'	'Betaproteobacteria'	'Burkholderiales'	'Alcaligenaceae'	'Achromobacter'	'Achromobacter xylosoxidans'
'GCF_001051055.1'	'Pseudomonadota'	'Betaproteobacteria'	'Burkholderiales'	'Alcaligenaceae'	'Achromobacter'	'Achromobacter xylosoxidans'
'GCF_001051055.1'	'Pseudomonadota'	'Betaproteobacteria'	'Burkholderiales'	'Alcaligenaceae'	'Achromobacter'	'Achromobacter xylosoxidans'
'GCF_001051055.1'	'Pseudomonadota'	'Betaproteobacteria'	'Burkholderiales'	'Alcaligenaceae'	'Achromobacter'	'Achromobacter xylosoxidans'
'GCF_001051055.1'	'Pseudomonadota'	'Betaproteobacteria'	'Burkholderiales'	'Alcaligenaceae'	'Achromobacter'	'Achromobacter xylosoxidans'
'GCF_001051055.1'	'Pseudomonadota'	'Betaproteobacteria'	'Burkholderiales'	'Alcaligenaceae'	'Achromobacter'	'Achromobacter xylosoxidans'
'GCF_001051055.1'	'Pseudomonadota'	'Betaproteobacteria'	'Burkholderiales'	'Alcaligenaceae'	'Achromobacter'	'Achromobacter xylosoxidans'
'GCF_000165835.1'	'Pseudomonadota'	'Betaproteobacteria'	'Burkholderiales'	'Alcaligenaceae'	'Achromobacter'	'Achromobacter xylosoxidans'
'GCF_000165835.1'	'Pseudomonadota'	'Betaproteobacteria'	'Burkholderiales'	'Alcaligenaceae'	'Achromobacter'	'Achromobacter xylosoxidans'
'GCF_000165835.1'	'Pseudomonadota'	'Betaproteobacteria'	'Burkholderiales'	'Alcaligenaceae'	'Achromobacter'	'Achromobacter xylosoxidans'
'GCF_000165835.1'	'Pseudomonadota'	'Betaproteobacteria'	'Burkholderiales'	'Alcaligenaceae'	'Achromobacter'	'Achromobacter xylosoxidans'
'GCF_000165835.1'	'Pseudomonadota'	'Betaproteobacteria'	'Burkholderiales'	'Alcaligenaceae'	'Achromobacter'	'Achromobacter xylosoxidans'
'GCF_000165835.1'	'Pseudomonadota'	'Betaproteobacteria'	'Burkholderiales'	'Alcaligenaceae'	'Achromobacter'	'Achromobacter xylosoxidans'
'GCF_000165835.1'	'Pseudomonadota'	'Betaproteobacteria'	'Burkholderiales'	'Alcaligenaceae'	'Achromobacter'	'Achromobacter xylosoxidans'
'GCF_000165835.1'	'Pseudomonadota'	'Betaproteobacteria'	'Burkholderiales'	'Alcaligenaceae'	'Achromobacter'	'Achromobacter xylosoxidans'
'GCF_000165835.1'	'Pseudomonadota'	'Betaproteobacteria'	'Burkholderiales'	'Alcaligenaceae'	'Achromobacter'	'Achromobacter xylosoxidans'
'GCF_000165835.1'	'Pseudomonadota'	'Betaproteobacteria'	'Burkholderiales'	'Alcaligenaceae'	'Achromobacter'	'Achromobacter xylosoxidans'
'GCF_000165835.1'	'Pseudomonadota'	'Betaproteobacteria'	'Burkholderiales'	'Alcaligenaceae'	'Achromobacter'	'Achromobacter xylosoxidans'
'GCF_000165835.1'	'Pseudomonadota'	'Betaproteobacteria'	'Burkholderiales'	'Alcaligenaceae'	'Achromobacter'	'Achromobacter xylosoxidans'
'GCF_000165835.1'	'Pseudomonadota'	'Betaproteobacteria'	'Burkholderiales'	'Alcaligenaceae'	'Achromobacter'	'Achromobacter xylosoxidans'
'GCF_000165835.1'	'Pseudomonadota'	'Betaproteobacteria'	'Burkholderiales'	'Alcaligenaceae'	'Achromobacter'	'Achromobacter xylosoxidans'
'GCF_000165835.1'	'Pseudomonadota'	'Betaproteobacteria'	'Burkholderiales'	'Alcaligenaceae'	'Achromobacter'	'Achromobacter xylosoxidans'
'GCF_000165835.1'	'Pseudomonadota'	'Betaproteobacteria'	'Burkholderiales'	'Alcaligenaceae'	'Achromobacter'	'Achromobacter xylosoxidans'
'GCF_000165835.1'	'Pseudomonadota'	'Betaproteobacteria'	'Burkholderiales'	'Alcaligenaceae'	'Achromobacter'	'Achromobacter xylosoxidans'
'GCF_000165835.1'	'Pseudomonadota'	'Betaproteobacteria'	'Burkholderiales'	'Alcaligenaceae'	'Achromobacter'	'Achromobacter xylosoxidans'
'GCF_000165835.1'	'Pseudomonadota'	'Betaproteobacteria'	'Burkholderiales'	'Alcaligenaceae'	'Achromobacter'	'Achromobacter xylosoxidans'
'GCF_000165835.1'	'Pseudomonadota'	'Betaproteobacteria'	'Burkholderiales'	'Alcaligenaceae'	'Achromobacter'	'Achromobacter xylosoxidans'
'GCF_000165835.1'	'Pseudomonadota'	'Betaproteobacteria'	'Burkholderiales'	'Alcaligenaceae'	'Achromobacter'	'Achromobacter xylosoxidans'
'GCF_000165835.1'	'Pseudomonadota'	'Betaproteobacteria'	'Burkholderiales'	'Alcaligenaceae'	'Achromobacter'	'Achromobacter xylosoxidans'
'GCF_000165835.1'	'Pseudomonadota'	'Betaproteobacteria'	'Burkholderiales'	'Alcaligenaceae'	'Achromobacter'	'Achromobacter xylosoxidans'
'GCF_000165835.1'	'Pseudomonadota'	'Betaproteobacteria'	'Burkholderiales'	'Alcaligenaceae'	'Achromobacter'	'Achromobacter xylosoxidans'
'GCF_002202135.1'	'Pseudomonadota'	'Alphaproteobacteria'	'Rhodospirillales'	'Acetobacteraceae'	'Acetobacter'	'Acetobacter pasteurianus'
'GCF_000010825.1'	'Pseudomonadota'	'Alphaproteobacteria'	'Rhodospirillales'	'Acetobacteraceae'	'Acetobacter'	'Acetobacter pasteurianus'
'GCF_000241585.2'	'Pseudomonadota'	'Alphaproteobacteria'	'Rhodospirillales'	'Acetobacteraceae'	'Acetobacter'	'Acetobacter pasteurianus'
'GCF_000241585.2'	'Pseudomonadota'	'Alphaproteobacteria'	'Rhodospirillales'	'Acetobacteraceae'	'Acetobacter'	'Acetobacter pasteurianus'
'GCF_000241585.2'	'Pseudomonadota'	'Alphaproteobacteria'	'Rhodospirillales'	'Acetobacteraceae'	'Acetobacter'	'Acetobacter pasteurianus'
'GCF_000241585.2'	'Pseudomonadota'	'Alphaproteobacteria'	'Rhodospirillales'	'Acetobacteraceae'	'Acetobacter'	'Acetobacter pasteurianus'
'GCF_000010905.1'	'Pseudomonadota'	'Alphaproteobacteria'	'Rhodospirillales'	'Acetobacteraceae'	'Acetobacter'	'Acetobacter pasteurianus'
'GCF_000010845.1'	'Pseudomonadota'	'Alphaproteobacteria'	'Rhodospirillales'	'Acetobacteraceae'	'Acetobacter'	'Acetobacter pasteurianus'
'GCF_000010885.1'	'Pseudomonadota'	'Alphaproteobacteria'	'Rhodospirillales'	'Acetobacteraceae'	'Acetobacter'	'Acetobacter pasteurianus'
'GCF_000010865.1'	'Pseudomonadota'	'Alphaproteobacteria'	'Rhodospirillales'	'Acetobacteraceae'	'Acetobacter'	'Acetobacter pasteurianus'
'GCF_000010925.1'	'Pseudomonadota'	'Alphaproteobacteria'	'Rhodospirillales'	'Acetobacteraceae'	'Acetobacter'	'Acetobacter pasteurianus'
'GCF_000010965.1'	'Pseudomonadota'	'Alphaproteobacteria'	'Rhodospirillales'	'Acetobacteraceae'	'Acetobacter'	'Acetobacter pasteurianus'
'GCF_000723785.2'	'Pseudomonadota'	'Alphaproteobacteria'	'Rhodospirillales'	'Acetobacteraceae'	'Acetobacter'	'Acetobacter pasteurianus'
'GCF_000723785.2'	'Pseudomonadota'	'Alphaproteobacteria'	'Rhodospirillales'	'Acetobacteraceae'	'Acetobacter'	'Acetobacter pasteurianus'
'GCF_000723785.2'	'Pseudomonadota'	'Alphaproteobacteria'	'Rhodospirillales'	'Acetobacteraceae'	'Acetobacter'	'Acetobacter pasteurianus'
'GCF_000723785.2'	'Pseudomonadota'	'Alphaproteobacteria'	'Rhodospirillales'	'Acetobacteraceae'	'Acetobacter'	'Acetobacter pasteurianus'
'GCF_000010945.1'	'Pseudomonadota'	'Alphaproteobacteria'	'Rhodospirillales'	'Acetobacteraceae'	'Acetobacter'	'Acetobacter pasteurianus'
'GCF_002005445.1'	'Pseudomonadota'	'Alphaproteobacteria'	'Rhodospirillales'	'Acetobacteraceae'	'Acetobacter'	'Acetobacter aceti'
'GCF_002005445.1'	'Pseudomonadota'	'Alphaproteobacteria'	'Rhodospirillales'	'Acetobacteraceae'	'Acetobacter'	'Acetobacter aceti'
'GCF_000783435.2'	'Pseudomonadota'	'Betaproteobacteria'	'Burkholderiales'	'Alcaligenaceae'	'Achromobacter'	'Achromobacter insolitus'
'GCF_000783435.2'	'Pseudomonadota'	'Betaproteobacteria'	'Burkholderiales'	'Alcaligenaceae'	'Achromobacter'	'Achromobacter insolitus'
'GCF_000783435.2'	'Pseudomonadota'	'Betaproteobacteria'	'Burkholderiales'	'Alcaligenaceae'	'Achromobacter'	'Achromobacter insolitus'
'GCF_000783435.2'	'Pseudomonadota'	'Betaproteobacteria'	'Burkholderiales'	'Alcaligenaceae'	'Achromobacter'	'Achromobacter insolitus'
'GCF_000783435.2'	'Pseudomonadota'	'Betaproteobacteria'	'Burkholderiales'	'Alcaligenaceae'	'Achromobacter'	'Achromobacter insolitus'
'GCF_000783435.2'	'Pseudomonadota'	'Betaproteobacteria'	'Burkholderiales'	'Alcaligenaceae'	'Achromobacter'	'Achromobacter insolitus'
'GCF_000783435.2'	'Pseudomonadota'	'Betaproteobacteria'	'Burkholderiales'	'Alcaligenaceae'	'Achromobacter'	'Achromobacter insolitus'
'GCF_000783435.2'	'Pseudomonadota'	'Betaproteobacteria'	'Burkholderiales'	'Alcaligenaceae'	'Achromobacter'	'Achromobacter insolitus'
'GCF_000783435.2'	'Pseudomonadota'	'Betaproteobacteria'	'Burkholderiales'	'Alcaligenaceae'	'Achromobacter'	'Achromobacter insolitus'
'GCF_000783435.2'	'Pseudomonadota'	'Betaproteobacteria'	'Burkholderiales'	'Alcaligenaceae'	'Achromobacter'	'Achromobacter insolitus'
'GCF_000783435.2'	'Pseudomonadota'	'Betaproteobacteria'	'Burkholderiales'	'Alcaligenaceae'	'Achromobacter'	'Achromobacter insolitus'
'GCF_003812265.1'	'Pseudomonadota'	'Betaproteobacteria'	'Burkholderiales'	'Alcaligenaceae'	'Achromobacter'	'Achromobacter denitrificans'
'GCF_003812265.1'	'Pseudomonadota'	'Betaproteobacteria'	'Burkholderiales'	'Alcaligenaceae'	'Achromobacter'	'Achromobacter denitrificans'
'GCF_003812265.1'	'Pseudomonadota'	'Betaproteobacteria'	'Burkholderiales'	'Alcaligenaceae'	'Achromobacter'	'Achromobacter denitrificans'
'GCF_003812265.1'	'Pseudomonadota'	'Betaproteobacteria'	'Burkholderiales'	'Alcaligenaceae'	'Achromobacter'	'Achromobacter denitrificans'
'GCF_003812265.1'	'Pseudomonadota'	'Betaproteobacteria'	'Burkholderiales'	'Alcaligenaceae'	'Achromobacter'	'Achromobacter denitrificans'
'GCF_003812265.1'	'Pseudomonadota'	'Betaproteobacteria'	'Burkholderiales'	'Alcaligenaceae'	'Achromobacter'	'Achromobacter denitrificans'
'GCF_003812265.1'	'Pseudomonadota'	'Betaproteobacteria'	'Burkholderiales'	'Alcaligenaceae'	'Achromobacter'	'Achromobacter denitrificans'
'GCF_003812265.1'	'Pseudomonadota'	'Betaproteobacteria'	'Burkholderiales'	'Alcaligenaceae'	'Achromobacter'	'Achromobacter denitrificans'
'GCF_003812265.1'	'Pseudomonadota'	'Betaproteobacteria'	'Burkholderiales'	'Alcaligenaceae'	'Achromobacter'	'Achromobacter denitrificans'
'GCF_003812265.1'	'Pseudomonadota'	'Betaproteobacteria'	'Burkholderiales'	'Alcaligenaceae'	'Achromobacter'	'Achromobacter denitrificans'
'GCF_003812265.1'	'Pseudomonadota'	'Betaproteobacteria'	'Burkholderiales'	'Alcaligenaceae'	'Achromobacter'	'Achromobacter denitrificans'
'GCF_003812265.1'	'Pseudomonadota'	'Betaproteobacteria'	'Burkholderiales'	'Alcaligenaceae'	'Achromobacter'	'Achromobacter denitrificans'
'GCF_003812265.1'	'Pseudomonadota'	'Betaproteobacteria'	'Burkholderiales'	'Alcaligenaceae'	'Achromobacter'	'Achromobacter denitrificans'
'GCF_002205315.1'	'Pseudomonadota'	'Betaproteobacteria'	'Burkholderiales'	'Alcaligenaceae'	'Achromobacter'	'Achromobacter denitrificans'
'GCF_002205315.1'	'Pseudomonadota'	'Betaproteobacteria'	'Burkholderiales'	'Alcaligenaceae'	'Achromobacter'	'Achromobacter denitrificans'
'GCF_002205315.1'	'Pseudomonadota'	'Betaproteobacteria'	'Burkholderiales'	'Alcaligenaceae'	'Achromobacter'	'Achromobacter denitrificans'
'GCF_002205315.1'	'Pseudomonadota'	'Betaproteobacteria'	'Burkholderiales'	'Alcaligenaceae'	'Achromobacter'	'Achromobacter denitrificans'
'GCF_002205315.1'	'Pseudomonadota'	'Betaproteobacteria'	'Burkholderiales'	'Alcaligenaceae'	'Achromobacter'	'Achromobacter denitrificans'
'GCF_002205315.1'	'Pseudomonadota'	'Betaproteobacteria'	'Burkholderiales'	'Alcaligenaceae'	'Achromobacter'	'Achromobacter denitrificans'
'GCF_002205315.1'	'Pseudomonadota'	'Betaproteobacteria'	'Burkholderiales'	'Alcaligenaceae'	'Achromobacter'	'Achromobacter denitrificans'
'GCF_002205315.1'	'Pseudomonadota'	'Betaproteobacteria'	'Burkholderiales'	'Alcaligenaceae'	'Achromobacter'	'Achromobacter denitrificans'
'GCF_002205315.1'	'Pseudomonadota'	'Betaproteobacteria'	'Burkholderiales'	'Alcaligenaceae'	'Achromobacter'	'Achromobacter denitrificans'
'GCF_002205315.1'	'Pseudomonadota'	'Betaproteobacteria'	'Burkholderiales'	'Alcaligenaceae'	'Achromobacter'	'Achromobacter denitrificans'
'GCF_002205315.1'	'Pseudomonadota'	'Betaproteobacteria'	'Burkholderiales'	'Alcaligenaceae'	'Achromobacter'	'Achromobacter denitrificans'
'GCF_002205315.1'	'Pseudomonadota'	'Betaproteobacteria'	'Burkholderiales'	'Alcaligenaceae'	'Achromobacter'	'Achromobacter denitrificans'
'GCF_002205315.1'	'Pseudomonadota'	'Betaproteobacteria'	'Burkholderiales'	'Alcaligenaceae'	'Achromobacter'	'Achromobacter denitrificans'
'GCF_002205315.1'	'Pseudomonadota'	'Betaproteobacteria'	'Burkholderiales'	'Alcaligenaceae'	'Achromobacter'	'Achromobacter denitrificans'
'GCF_002205315.1'	'Pseudomonadota'	'Betaproteobacteria'	'Burkholderiales'	'Alcaligenaceae'	'Achromobacter'	'Achromobacter denitrificans'
'GCF_002205315.1'	'Pseudomonadota'	'Betaproteobacteria'	'Burkholderiales'	'Alcaligenaceae'	'Achromobacter'	'Achromobacter denitrificans'
'GCF_002205315.1'	'Pseudomonadota'	'Betaproteobacteria'	'Burkholderiales'	'Alcaligenaceae'	'Achromobacter'	'Achromobacter denitrificans'
'GCF_002205315.1'	'Pseudomonadota'	'Betaproteobacteria'	'Burkholderiales'	'Alcaligenaceae'	'Achromobacter'	'Achromobacter denitrificans'
'GCF_002205315.1'	'Pseudomonadota'	'Betaproteobacteria'	'Burkholderiales'	'Alcaligenaceae'	'Achromobacter'	'Achromobacter denitrificans'
'GCF_013343095.1'	'Pseudomonadota'	'Betaproteobacteria'	'Burkholderiales'	'Alcaligenaceae'	'Achromobacter'	'Achromobacter denitrificans'
'GCF_013343095.1'	'Pseudomonadota'	'Betaproteobacteria'	'Burkholderiales'	'Alcaligenaceae'	'Achromobacter'	'Achromobacter denitrificans'
'GCF_013343095.1'	'Pseudomonadota'	'Betaproteobacteria'	'Burkholderiales'	'Alcaligenaceae'	'Achromobacter'	'Achromobacter denitrificans'
'GCF_013343095.1'	'Pseudomonadota'	'Betaproteobacteria'	'Burkholderiales'	'Alcaligenaceae'	'Achromobacter'	'Achromobacter denitrificans'
'GCF_013343095.1'	'Pseudomonadota'	'Betaproteobacteria'	'Burkholderiales'	'Alcaligenaceae'	'Achromobacter'	'Achromobacter denitrificans'
'GCF_013343095.1'	'Pseudomonadota'	'Betaproteobacteria'	'Burkholderiales'	'Alcaligenaceae'	'Achromobacter'	'Achromobacter denitrificans'
'GCF_013343095.1'	'Pseudomonadota'	'Betaproteobacteria'	'Burkholderiales'	'Alcaligenaceae'	'Achromobacter'	'Achromobacter denitrificans'
'GCF_013343095.1'	'Pseudomonadota'	'Betaproteobacteria'	'Burkholderiales'	'Alcaligenaceae'	'Achromobacter'	'Achromobacter denitrificans'
'GCF_013343095.1'	'Pseudomonadota'	'Betaproteobacteria'	'Burkholderiales'	'Alcaligenaceae'	'Achromobacter'	'Achromobacter denitrificans'
'GCF_013343095.1'	'Pseudomonadota'	'Betaproteobacteria'	'Burkholderiales'	'Alcaligenaceae'	'Achromobacter'	'Achromobacter denitrificans'
'GCF_013343095.1'	'Pseudomonadota'	'Betaproteobacteria'	'Burkholderiales'	'Alcaligenaceae'	'Achromobacter'	'Achromobacter denitrificans'
'GCF_013343095.1'	'Pseudomonadota'	'Betaproteobacteria'	'Burkholderiales'	'Alcaligenaceae'	'Achromobacter'	'Achromobacter denitrificans'
'GCF_013343095.1'	'Pseudomonadota'	'Betaproteobacteria'	'Burkholderiales'	'Alcaligenaceae'	'Achromobacter'	'Achromobacter denitrificans'
'GCF_013343095.1'	'Pseudomonadota'	'Betaproteobacteria'	'Burkholderiales'	'Alcaligenaceae'	'Achromobacter'	'Achromobacter denitrificans'
'GCF_013343095.1'	'Pseudomonadota'	'Betaproteobacteria'	'Burkholderiales'	'Alcaligenaceae'	'Achromobacter'	'Achromobacter denitrificans'
'GCF_013343095.1'	'Pseudomonadota'	'Betaproteobacteria'	'Burkholderiales'	'Alcaligenaceae'	'Achromobacter'	'Achromobacter denitrificans'
'GCF_013343095.1'	'Pseudomonadota'	'Betaproteobacteria'	'Burkholderiales'	'Alcaligenaceae'	'Achromobacter'	'Achromobacter denitrificans'
'GCF_013343095.1'	'Pseudomonadota'	'Betaproteobacteria'	'Burkholderiales'	'Alcaligenaceae'	'Achromobacter'	'Achromobacter denitrificans'
'GCF_013343095.1'	'Pseudomonadota'	'Betaproteobacteria'	'Burkholderiales'	'Alcaligenaceae'	'Achromobacter'	'Achromobacter denitrificans'
'GCF_013343095.1'	'Pseudomonadota'	'Betaproteobacteria'	'Burkholderiales'	'Alcaligenaceae'	'Achromobacter'	'Achromobacter denitrificans'
'GCF_029543025.1'	'Pseudomonadota'	'Betaproteobacteria'	'Burkholderiales'	'Alcaligenaceae'	'Achromobacter'	'Achromobacter denitrificans'
'GCF_029543025.1'	'Pseudomonadota'	'Betaproteobacteria'	'Burkholderiales'	'Alcaligenaceae'	'Achromobacter'	'Achromobacter denitrificans'
'GCF_029543025.1'	'Pseudomonadota'	'Betaproteobacteria'	'Burkholderiales'	'Alcaligenaceae'	'Achromobacter'	'Achromobacter denitrificans'
'GCF_029543025.1'	'Pseudomonadota'	'Betaproteobacteria'	'Burkholderiales'	'Alcaligenaceae'	'Achromobacter'	'Achromobacter denitrificans'
'GCF_029543025.1'	'Pseudomonadota'	'Betaproteobacteria'	'Burkholderiales'	'Alcaligenaceae'	'Achromobacter'	'Achromobacter denitrificans'
'GCF_029543025.1'	'Pseudomonadota'	'Betaproteobacteria'	'Burkholderiales'	'Alcaligenaceae'	'Achromobacter'	'Achromobacter denitrificans'
'GCF_029543025.1'	'Pseudomonadota'	'Betaproteobacteria'	'Burkholderiales'	'Alcaligenaceae'	'Achromobacter'	'Achromobacter denitrificans'
'GCF_029543025.1'	'Pseudomonadota'	'Betaproteobacteria'	'Burkholderiales'	'Alcaligenaceae'	'Achromobacter'	'Achromobacter denitrificans'
'GCF_029543025.1'	'Pseudomonadota'	'Betaproteobacteria'	'Burkholderiales'	'Alcaligenaceae'	'Achromobacter'	'Achromobacter denitrificans'
'GCF_029543025.1'	'Pseudomonadota'	'Betaproteobacteria'	'Burkholderiales'	'Alcaligenaceae'	'Achromobacter'	'Achromobacter denitrificans'
'GCF_029543025.1'	'Pseudomonadota'	'Betaproteobacteria'	'Burkholderiales'	'Alcaligenaceae'	'Achromobacter'	'Achromobacter denitrificans'
'GCF_029543025.1'	'Pseudomonadota'	'Betaproteobacteria'	'Burkholderiales'	'Alcaligenaceae'	'Achromobacter'	'Achromobacter denitrificans'
'GCF_029543025.1'	'Pseudomonadota'	'Betaproteobacteria'	'Burkholderiales'	'Alcaligenaceae'	'Achromobacter'	'Achromobacter denitrificans'
'GCF_029543025.1'	'Pseudomonadota'	'Betaproteobacteria'	'Burkholderiales'	'Alcaligenaceae'	'Achromobacter'	'Achromobacter denitrificans'
'GCF_029543025.1'	'Pseudomonadota'	'Betaproteobacteria'	'Burkholderiales'	'Alcaligenaceae'	'Achromobacter'	'Achromobacter denitrificans'
'GCF_029543025.1'	'Pseudomonadota'	'Betaproteobacteria'	'Burkholderiales'	'Alcaligenaceae'	'Achromobacter'	'Achromobacter denitrificans'
'GCF_001514355.1'	'Pseudomonadota'	'Betaproteobacteria'	'Burkholderiales'	'Alcaligenaceae'	'Achromobacter'	'Achromobacter denitrificans'
'GCF_001514355.1'	'Pseudomonadota'	'Betaproteobacteria'	'Burkholderiales'	'Alcaligenaceae'	'Achromobacter'	'Achromobacter denitrificans'
'GCF_001514355.1'	'Pseudomonadota'	'Betaproteobacteria'	'Burkholderiales'	'Alcaligenaceae'	'Achromobacter'	'Achromobacter denitrificans'
'GCF_001514355.1'	'Pseudomonadota'	'Betaproteobacteria'	'Burkholderiales'	'Alcaligenaceae'	'Achromobacter'	'Achromobacter denitrificans'
'GCF_001514355.1'	'Pseudomonadota'	'Betaproteobacteria'	'Burkholderiales'	'Alcaligenaceae'	'Achromobacter'	'Achromobacter denitrificans'
'GCF_001514355.1'	'Pseudomonadota'	'Betaproteobacteria'	'Burkholderiales'	'Alcaligenaceae'	'Achromobacter'	'Achromobacter denitrificans'
'GCF_001514355.1'	'Pseudomonadota'	'Betaproteobacteria'	'Burkholderiales'	'Alcaligenaceae'	'Achromobacter'	'Achromobacter denitrificans'
'GCF_001514355.1'	'Pseudomonadota'	'Betaproteobacteria'	'Burkholderiales'	'Alcaligenaceae'	'Achromobacter'	'Achromobacter denitrificans'
'GCF_001514355.1'	'Pseudomonadota'	'Betaproteobacteria'	'Burkholderiales'	'Alcaligenaceae'	'Achromobacter'	'Achromobacter denitrificans'
'GCF_001514355.1'	'Pseudomonadota'	'Betaproteobacteria'	'Burkholderiales'	'Alcaligenaceae'	'Achromobacter'	'Achromobacter denitrificans'
'GCF_001514355.1'	'Pseudomonadota'	'Betaproteobacteria'	'Burkholderiales'	'Alcaligenaceae'	'Achromobacter'	'Achromobacter denitrificans'
'GCF_001514355.1'	'Pseudomonadota'	'Betaproteobacteria'	'Burkholderiales'	'Alcaligenaceae'	'Achromobacter'	'Achromobacter denitrificans'
'GCF_002549835.1'	'Pseudomonadota'	'Alphaproteobacteria'	'Rhodospirillales'	'Acetobacteraceae'	'Acetobacter'	'Acetobacter tropicalis'
'GCF_002549835.1'	'Pseudomonadota'	'Alphaproteobacteria'	'Rhodospirillales'	'Acetobacteraceae'	'Acetobacter'	'Acetobacter tropicalis'
'GCF_002549835.1'	'Pseudomonadota'	'Alphaproteobacteria'	'Rhodospirillales'	'Acetobacteraceae'	'Acetobacter'	'Acetobacter tropicalis'
'GCF_022576045.1'	'Pseudomonadota'	'Gammaproteobacteria'	'Pseudomonadales'	'Pseudomonadaceae'	'Stutzerimonas'	'[Pseudomonas] zhaodongensis'
'GCF_018972185.1'	'Pseudomonadota'	'Gammaproteobacteria'	'Pseudomonadales'	'Pseudomonadaceae'	'Stutzerimonas'	'[Pseudomonas] zhaodongensis'
'GCF_018972185.1'	'Pseudomonadota'	'Gammaproteobacteria'	'Pseudomonadales'	'Pseudomonadaceae'	'Stutzerimonas'	'[Pseudomonas] zhaodongensis'
'GCF_018972185.1'	'Pseudomonadota'	'Gammaproteobacteria'	'Pseudomonadales'	'Pseudomonadaceae'	'Stutzerimonas'	'[Pseudomonas] zhaodongensis'
'GCF_018972185.1'	'Pseudomonadota'	'Gammaproteobacteria'	'Pseudomonadales'	'Pseudomonadaceae'	'Stutzerimonas'	'[Pseudomonas] zhaodongensis'
'GCF_003391275.1'	'Pseudomonadota'	'Alphaproteobacteria'	'Rhodospirillales'	'Acetobacteraceae'	'Acetobacter'	'Acetobacter pomorum'
'GCF_003391275.1'	'Pseudomonadota'	'Alphaproteobacteria'	'Rhodospirillales'	'Acetobacteraceae'	'Acetobacter'	'Acetobacter pomorum'
'GCF_003391275.1'	'Pseudomonadota'	'Alphaproteobacteria'	'Rhodospirillales'	'Acetobacteraceae'	'Acetobacter'	'Acetobacter pomorum'
'GCF_003391275.1'	'Pseudomonadota'	'Alphaproteobacteria'	'Rhodospirillales'	'Acetobacteraceae'	'Acetobacter'	'Acetobacter pomorum'
'GCF_003994415.1'	'Pseudomonadota'	'Betaproteobacteria'	'Burkholderiales'	'Alcaligenaceae'	'Achromobacter'	'Achromobacter spanius'
'GCF_003994415.1'	'Pseudomonadota'	'Betaproteobacteria'	'Burkholderiales'	'Alcaligenaceae'	'Achromobacter'	'Achromobacter spanius'
'GCF_003994415.1'	'Pseudomonadota'	'Betaproteobacteria'	'Burkholderiales'	'Alcaligenaceae'	'Achromobacter'	'Achromobacter spanius'
'GCF_003994415.1'	'Pseudomonadota'	'Betaproteobacteria'	'Burkholderiales'	'Alcaligenaceae'	'Achromobacter'	'Achromobacter spanius'
'GCF_003994415.1'	'Pseudomonadota'	'Betaproteobacteria'	'Burkholderiales'	'Alcaligenaceae'	'Achromobacter'	'Achromobacter spanius'
'GCF_003994415.1'	'Pseudomonadota'	'Betaproteobacteria'	'Burkholderiales'	'Alcaligenaceae'	'Achromobacter'	'Achromobacter spanius'
'GCF_003994415.1'	'Pseudomonadota'	'Betaproteobacteria'	'Burkholderiales'	'Alcaligenaceae'	'Achromobacter'	'Achromobacter spanius'
'GCF_003994415.1'	'Pseudomonadota'	'Betaproteobacteria'	'Burkholderiales'	'Alcaligenaceae'	'Achromobacter'	'Achromobacter spanius'
'GCF_003994415.1'	'Pseudomonadota'	'Betaproteobacteria'	'Burkholderiales'	'Alcaligenaceae'	'Achromobacter'	'Achromobacter spanius'
'GCF_003994415.1'	'Pseudomonadota'	'Betaproteobacteria'	'Burkholderiales'	'Alcaligenaceae'	'Achromobacter'	'Achromobacter spanius'
'GCF_003994415.1'	'Pseudomonadota'	'Betaproteobacteria'	'Burkholderiales'	'Alcaligenaceae'	'Achromobacter'	'Achromobacter spanius'
'GCF_003994415.1'	'Pseudomonadota'	'Betaproteobacteria'	'Burkholderiales'	'Alcaligenaceae'	'Achromobacter'	'Achromobacter spanius'
'GCF_029637605.1'	'Pseudomonadota'	'Betaproteobacteria'	'Burkholderiales'	'Alcaligenaceae'	'Achromobacter'	'Achromobacter spanius'
'GCF_029637605.1'	'Pseudomonadota'	'Betaproteobacteria'	'Burkholderiales'	'Alcaligenaceae'	'Achromobacter'	'Achromobacter spanius'
'GCF_029637605.1'	'Pseudomonadota'	'Betaproteobacteria'	'Burkholderiales'	'Alcaligenaceae'	'Achromobacter'	'Achromobacter spanius'
'GCF_029637605.1'	'Pseudomonadota'	'Betaproteobacteria'	'Burkholderiales'	'Alcaligenaceae'	'Achromobacter'	'Achromobacter spanius'
'GCF_029637605.1'	'Pseudomonadota'	'Betaproteobacteria'	'Burkholderiales'	'Alcaligenaceae'	'Achromobacter'	'Achromobacter spanius'
'GCF_029637605.1'	'Pseudomonadota'	'Betaproteobacteria'	'Burkholderiales'	'Alcaligenaceae'	'Achromobacter'	'Achromobacter spanius'
'GCF_029637605.1'	'Pseudomonadota'	'Betaproteobacteria'	'Burkholderiales'	'Alcaligenaceae'	'Achromobacter'	'Achromobacter spanius'
'GCF_029637605.1'	'Pseudomonadota'	'Betaproteobacteria'	'Burkholderiales'	'Alcaligenaceae'	'Achromobacter'	'Achromobacter spanius'
'GCF_029637605.1'	'Pseudomonadota'	'Betaproteobacteria'	'Burkholderiales'	'Alcaligenaceae'	'Achromobacter'	'Achromobacter spanius'
'GCF_026692605.1'	'Pseudomonadota'	'Betaproteobacteria'	'Burkholderiales'	'Alcaligenaceae'	'Achromobacter'	'Achromobacter spanius'
'GCF_026692605.1'	'Pseudomonadota'	'Betaproteobacteria'	'Burkholderiales'	'Alcaligenaceae'	'Achromobacter'	'Achromobacter spanius'
'GCF_026692605.1'	'Pseudomonadota'	'Betaproteobacteria'	'Burkholderiales'	'Alcaligenaceae'	'Achromobacter'	'Achromobacter spanius'
'GCF_026692605.1'	'Pseudomonadota'	'Betaproteobacteria'	'Burkholderiales'	'Alcaligenaceae'	'Achromobacter'	'Achromobacter spanius'
'GCF_026692605.1'	'Pseudomonadota'	'Betaproteobacteria'	'Burkholderiales'	'Alcaligenaceae'	'Achromobacter'	'Achromobacter spanius'
'GCF_026692605.1'	'Pseudomonadota'	'Betaproteobacteria'	'Burkholderiales'	'Alcaligenaceae'	'Achromobacter'	'Achromobacter spanius'
'GCF_026692605.1'	'Pseudomonadota'	'Betaproteobacteria'	'Burkholderiales'	'Alcaligenaceae'	'Achromobacter'	'Achromobacter spanius'
'GCF_026692605.1'	'Pseudomonadota'	'Betaproteobacteria'	'Burkholderiales'	'Alcaligenaceae'	'Achromobacter'	'Achromobacter spanius'
'GCF_026692605.1'	'Pseudomonadota'	'Betaproteobacteria'	'Burkholderiales'	'Alcaligenaceae'	'Achromobacter'	'Achromobacter spanius'
'GCF_002966795.1'	'Pseudomonadota'	'Betaproteobacteria'	'Burkholderiales'	'Alcaligenaceae'	'Achromobacter'	'Achromobacter spanius'
'GCF_002966795.1'	'Pseudomonadota'	'Betaproteobacteria'	'Burkholderiales'	'Alcaligenaceae'	'Achromobacter'	'Achromobacter spanius'
'GCF_002966795.1'	'Pseudomonadota'	'Betaproteobacteria'	'Burkholderiales'	'Alcaligenaceae'	'Achromobacter'	'Achromobacter spanius'
'GCF_002966795.1'	'Pseudomonadota'	'Betaproteobacteria'	'Burkholderiales'	'Alcaligenaceae'	'Achromobacter'	'Achromobacter spanius'
'GCF_002966795.1'	'Pseudomonadota'	'Betaproteobacteria'	'Burkholderiales'	'Alcaligenaceae'	'Achromobacter'	'Achromobacter spanius'
'GCF_002966795.1'	'Pseudomonadota'	'Betaproteobacteria'	'Burkholderiales'	'Alcaligenaceae'	'Achromobacter'	'Achromobacter spanius'
'GCF_002966795.1'	'Pseudomonadota'	'Betaproteobacteria'	'Burkholderiales'	'Alcaligenaceae'	'Achromobacter'	'Achromobacter spanius'
'GCF_002966795.1'	'Pseudomonadota'	'Betaproteobacteria'	'Burkholderiales'	'Alcaligenaceae'	'Achromobacter'	'Achromobacter spanius'
'GCF_002966795.1'	'Pseudomonadota'	'Betaproteobacteria'	'Burkholderiales'	'Alcaligenaceae'	'Achromobacter'	'Achromobacter spanius'
'GCF_002966795.1'	'Pseudomonadota'	'Betaproteobacteria'	'Burkholderiales'	'Alcaligenaceae'	'Achromobacter'	'Achromobacter spanius'
'GCF_002966795.1'	'Pseudomonadota'	'Betaproteobacteria'	'Burkholderiales'	'Alcaligenaceae'	'Achromobacter'	'Achromobacter spanius'
'GCF_002966795.1'	'Pseudomonadota'	'Betaproteobacteria'	'Burkholderiales'	'Alcaligenaceae'	'Achromobacter'	'Achromobacter spanius'
'GCF_002966795.1'	'Pseudomonadota'	'Betaproteobacteria'	'Burkholderiales'	'Alcaligenaceae'	'Achromobacter'	'Achromobacter spanius'
'GCF_002966795.1'	'Pseudomonadota'	'Betaproteobacteria'	'Burkholderiales'	'Alcaligenaceae'	'Achromobacter'	'Achromobacter spanius'
'GCF_002966795.1'	'Pseudomonadota'	'Betaproteobacteria'	'Burkholderiales'	'Alcaligenaceae'	'Achromobacter'	'Achromobacter spanius'
'GCF_002966795.1'	'Pseudomonadota'	'Betaproteobacteria'	'Burkholderiales'	'Alcaligenaceae'	'Achromobacter'	'Achromobacter spanius'
'GCF_002966795.1'	'Pseudomonadota'	'Betaproteobacteria'	'Burkholderiales'	'Alcaligenaceae'	'Achromobacter'	'Achromobacter spanius'
'GCF_002966795.1'	'Pseudomonadota'	'Betaproteobacteria'	'Burkholderiales'	'Alcaligenaceae'	'Achromobacter'	'Achromobacter spanius'
'GCF_002966795.1'	'Pseudomonadota'	'Betaproteobacteria'	'Burkholderiales'	'Alcaligenaceae'	'Achromobacter'	'Achromobacter spanius'
'GCF_002966795.1'	'Pseudomonadota'	'Betaproteobacteria'	'Burkholderiales'	'Alcaligenaceae'	'Achromobacter'	'Achromobacter spanius'
'GCF_002966795.1'	'Pseudomonadota'	'Betaproteobacteria'	'Burkholderiales'	'Alcaligenaceae'	'Achromobacter'	'Achromobacter spanius'
'GCF_002966795.1'	'Pseudomonadota'	'Betaproteobacteria'	'Burkholderiales'	'Alcaligenaceae'	'Achromobacter'	'Achromobacter spanius'
'GCF_002966795.1'	'Pseudomonadota'	'Betaproteobacteria'	'Burkholderiales'	'Alcaligenaceae'	'Achromobacter'	'Achromobacter spanius'
'GCF_002966795.1'	'Pseudomonadota'	'Betaproteobacteria'	'Burkholderiales'	'Alcaligenaceae'	'Achromobacter'	'Achromobacter spanius'
'GCF_002966795.1'	'Pseudomonadota'	'Betaproteobacteria'	'Burkholderiales'	'Alcaligenaceae'	'Achromobacter'	'Achromobacter spanius'
'GCF_002966795.1'	'Pseudomonadota'	'Betaproteobacteria'	'Burkholderiales'	'Alcaligenaceae'	'Achromobacter'	'Achromobacter spanius'
'GCF_002966795.1'	'Pseudomonadota'	'Betaproteobacteria'	'Burkholderiales'	'Alcaligenaceae'	'Achromobacter'	'Achromobacter spanius'
'GCF_027941855.1'	'Pseudomonadota'	'Betaproteobacteria'	'Burkholderiales'	'Alcaligenaceae'	'Achromobacter'	'Achromobacter mucicolens'
'GCF_027941855.1'	'Pseudomonadota'	'Betaproteobacteria'	'Burkholderiales'	'Alcaligenaceae'	'Achromobacter'	'Achromobacter mucicolens'
'GCF_027941855.1'	'Pseudomonadota'	'Betaproteobacteria'	'Burkholderiales'	'Alcaligenaceae'	'Achromobacter'	'Achromobacter mucicolens'
'GCF_027941855.1'	'Pseudomonadota'	'Betaproteobacteria'	'Burkholderiales'	'Alcaligenaceae'	'Achromobacter'	'Achromobacter mucicolens'
'GCF_027941855.1'	'Pseudomonadota'	'Betaproteobacteria'	'Burkholderiales'	'Alcaligenaceae'	'Achromobacter'	'Achromobacter mucicolens'
'GCF_027941855.1'	'Pseudomonadota'	'Betaproteobacteria'	'Burkholderiales'	'Alcaligenaceae'	'Achromobacter'	'Achromobacter mucicolens'
'GCF_027941855.1'	'Pseudomonadota'	'Betaproteobacteria'	'Burkholderiales'	'Alcaligenaceae'	'Achromobacter'	'Achromobacter mucicolens'
'GCF_027941855.1'	'Pseudomonadota'	'Betaproteobacteria'	'Burkholderiales'	'Alcaligenaceae'	'Achromobacter'	'Achromobacter mucicolens'
'GCF_027941855.1'	'Pseudomonadota'	'Betaproteobacteria'	'Burkholderiales'	'Alcaligenaceae'	'Achromobacter'	'Achromobacter mucicolens'
'GCF_027941855.1'	'Pseudomonadota'	'Betaproteobacteria'	'Burkholderiales'	'Alcaligenaceae'	'Achromobacter'	'Achromobacter mucicolens'
'GCF_029866465.1'	'Pseudomonadota'	'Betaproteobacteria'	'Burkholderiales'	'Alcaligenaceae'	'Achromobacter'	'Achromobacter mucicolens'
'GCF_029866465.1'	'Pseudomonadota'	'Betaproteobacteria'	'Burkholderiales'	'Alcaligenaceae'	'Achromobacter'	'Achromobacter mucicolens'
'GCF_029866465.1'	'Pseudomonadota'	'Betaproteobacteria'	'Burkholderiales'	'Alcaligenaceae'	'Achromobacter'	'Achromobacter mucicolens'
'GCF_029866465.1'	'Pseudomonadota'	'Betaproteobacteria'	'Burkholderiales'	'Alcaligenaceae'	'Achromobacter'	'Achromobacter mucicolens'
'GCF_029866465.1'	'Pseudomonadota'	'Betaproteobacteria'	'Burkholderiales'	'Alcaligenaceae'	'Achromobacter'	'Achromobacter mucicolens'
'GCF_029866465.1'	'Pseudomonadota'	'Betaproteobacteria'	'Burkholderiales'	'Alcaligenaceae'	'Achromobacter'	'Achromobacter mucicolens'
'GCF_029866465.1'	'Pseudomonadota'	'Betaproteobacteria'	'Burkholderiales'	'Alcaligenaceae'	'Achromobacter'	'Achromobacter mucicolens'
'GCF_029866465.1'	'Pseudomonadota'	'Betaproteobacteria'	'Burkholderiales'	'Alcaligenaceae'	'Achromobacter'	'Achromobacter mucicolens'
'GCF_029866465.1'	'Pseudomonadota'	'Betaproteobacteria'	'Burkholderiales'	'Alcaligenaceae'	'Achromobacter'	'Achromobacter mucicolens'
'GCF_003966365.1'	'Pseudomonadota'	'Alphaproteobacteria'	'Rhodospirillales'	'Acetobacteraceae'	'Acetobacter'	'Acetobacter orientalis'
'GCF_024347835.1'	'Cyanobacteriota'	'Cyanophyceae'	'Synechococcales'	'Acaryochloridaceae'	'Acaryochloris'	'Acaryochloris marina'
'GCF_024347835.1'	'Cyanobacteriota'	'Cyanophyceae'	'Synechococcales'	'Acaryochloridaceae'	'Acaryochloris'	'Acaryochloris marina'
'GCF_018336915.1'	'Cyanobacteriota'	'Cyanophyceae'	'Synechococcales'	'Acaryochloridaceae'	'Acaryochloris'	'Acaryochloris marina'
'GCF_018336915.1'	'Cyanobacteriota'	'Cyanophyceae'	'Synechococcales'	'Acaryochloridaceae'	'Acaryochloris'	'Acaryochloris marina'
'GCF_018336915.1'	'Cyanobacteriota'	'Cyanophyceae'	'Synechococcales'	'Acaryochloridaceae'	'Acaryochloris'	'Acaryochloris marina'
'GCF_018336915.1'	'Cyanobacteriota'	'Cyanophyceae'	'Synechococcales'	'Acaryochloridaceae'	'Acaryochloris'	'Acaryochloris marina'
'GCF_016127315.1'	'Pseudomonadota'	'Betaproteobacteria'	'Burkholderiales'	'Alcaligenaceae'	'Achromobacter'	'Achromobacter deleyi'
'GCF_016127315.1'	'Pseudomonadota'	'Betaproteobacteria'	'Burkholderiales'	'Alcaligenaceae'	'Achromobacter'	'Achromobacter deleyi'
'GCF_016127315.1'	'Pseudomonadota'	'Betaproteobacteria'	'Burkholderiales'	'Alcaligenaceae'	'Achromobacter'	'Achromobacter deleyi'
'GCF_016127315.1'	'Pseudomonadota'	'Betaproteobacteria'	'Burkholderiales'	'Alcaligenaceae'	'Achromobacter'	'Achromobacter deleyi'
'GCF_016127315.1'	'Pseudomonadota'	'Betaproteobacteria'	'Burkholderiales'	'Alcaligenaceae'	'Achromobacter'	'Achromobacter deleyi'
'GCF_016127315.1'	'Pseudomonadota'	'Betaproteobacteria'	'Burkholderiales'	'Alcaligenaceae'	'Achromobacter'	'Achromobacter deleyi'
'GCF_016127315.1'	'Pseudomonadota'	'Betaproteobacteria'	'Burkholderiales'	'Alcaligenaceae'	'Achromobacter'	'Achromobacter deleyi'
'GCF_016127315.1'	'Pseudomonadota'	'Betaproteobacteria'	'Burkholderiales'	'Alcaligenaceae'	'Achromobacter'	'Achromobacter deleyi'
'GCF_016127315.1'	'Pseudomonadota'	'Betaproteobacteria'	'Burkholderiales'	'Alcaligenaceae'	'Achromobacter'	'Achromobacter deleyi'
'GCF_016127315.1'	'Pseudomonadota'	'Betaproteobacteria'	'Burkholderiales'	'Alcaligenaceae'	'Achromobacter'	'Achromobacter deleyi'
'GCF_016127315.1'	'Pseudomonadota'	'Betaproteobacteria'	'Burkholderiales'	'Alcaligenaceae'	'Achromobacter'	'Achromobacter deleyi'
'GCF_016127315.1'	'Pseudomonadota'	'Betaproteobacteria'	'Burkholderiales'	'Alcaligenaceae'	'Achromobacter'	'Achromobacter deleyi'
'GCF_016127315.1'	'Pseudomonadota'	'Betaproteobacteria'	'Burkholderiales'	'Alcaligenaceae'	'Achromobacter'	'Achromobacter deleyi'
'GCF_016127315.1'	'Pseudomonadota'	'Betaproteobacteria'	'Burkholderiales'	'Alcaligenaceae'	'Achromobacter'	'Achromobacter deleyi'
'GCF_016127315.1'	'Pseudomonadota'	'Betaproteobacteria'	'Burkholderiales'	'Alcaligenaceae'	'Achromobacter'	'Achromobacter deleyi'
'GCF_016127315.1'	'Pseudomonadota'	'Betaproteobacteria'	'Burkholderiales'	'Alcaligenaceae'	'Achromobacter'	'Achromobacter deleyi'
'GCF_016127315.1'	'Pseudomonadota'	'Betaproteobacteria'	'Burkholderiales'	'Alcaligenaceae'	'Achromobacter'	'Achromobacter deleyi'
'GCF_016127315.1'	'Pseudomonadota'	'Betaproteobacteria'	'Burkholderiales'	'Alcaligenaceae'	'Achromobacter'	'Achromobacter deleyi'
'GCF_016127315.1'	'Pseudomonadota'	'Betaproteobacteria'	'Burkholderiales'	'Alcaligenaceae'	'Achromobacter'	'Achromobacter deleyi'
'GCF_016127315.1'	'Pseudomonadota'	'Betaproteobacteria'	'Burkholderiales'	'Alcaligenaceae'	'Achromobacter'	'Achromobacter deleyi'
'GCF_016127315.1'	'Pseudomonadota'	'Betaproteobacteria'	'Burkholderiales'	'Alcaligenaceae'	'Achromobacter'	'Achromobacter deleyi'
'GCF_016127315.1'	'Pseudomonadota'	'Betaproteobacteria'	'Burkholderiales'	'Alcaligenaceae'	'Achromobacter'	'Achromobacter deleyi'
'GCF_016127315.1'	'Pseudomonadota'	'Betaproteobacteria'	'Burkholderiales'	'Alcaligenaceae'	'Achromobacter'	'Achromobacter deleyi'
'GCF_016127315.1'	'Pseudomonadota'	'Betaproteobacteria'	'Burkholderiales'	'Alcaligenaceae'	'Achromobacter'	'Achromobacter deleyi'
'GCF_016127315.1'	'Pseudomonadota'	'Betaproteobacteria'	'Burkholderiales'	'Alcaligenaceae'	'Achromobacter'	'Achromobacter deleyi'
'GCF_016127315.1'	'Pseudomonadota'	'Betaproteobacteria'	'Burkholderiales'	'Alcaligenaceae'	'Achromobacter'	'Achromobacter deleyi'
'GCF_016127315.1'	'Pseudomonadota'	'Betaproteobacteria'	'Burkholderiales'	'Alcaligenaceae'	'Achromobacter'	'Achromobacter deleyi'
'GCF_016127315.1'	'Pseudomonadota'	'Betaproteobacteria'	'Burkholderiales'	'Alcaligenaceae'	'Achromobacter'	'Achromobacter deleyi'
'GCF_016127315.1'	'Pseudomonadota'	'Betaproteobacteria'	'Burkholderiales'	'Alcaligenaceae'	'Achromobacter'	'Achromobacter deleyi'
'GCF_016127315.1'	'Pseudomonadota'	'Betaproteobacteria'	'Burkholderiales'	'Alcaligenaceae'	'Achromobacter'	'Achromobacter deleyi'
'GCF_016127315.1'	'Pseudomonadota'	'Betaproteobacteria'	'Burkholderiales'	'Alcaligenaceae'	'Achromobacter'	'Achromobacter deleyi'
'GCF_016127315.1'	'Pseudomonadota'	'Betaproteobacteria'	'Burkholderiales'	'Alcaligenaceae'	'Achromobacter'	'Achromobacter deleyi'
'GCF_016127315.1'	'Pseudomonadota'	'Betaproteobacteria'	'Burkholderiales'	'Alcaligenaceae'	'Achromobacter'	'Achromobacter deleyi'
'GCF_016127315.1'	'Pseudomonadota'	'Betaproteobacteria'	'Burkholderiales'	'Alcaligenaceae'	'Achromobacter'	'Achromobacter deleyi'
'GCF_016127315.1'	'Pseudomonadota'	'Betaproteobacteria'	'Burkholderiales'	'Alcaligenaceae'	'Achromobacter'	'Achromobacter deleyi'
'GCF_016127315.1'	'Pseudomonadota'	'Betaproteobacteria'	'Burkholderiales'	'Alcaligenaceae'	'Achromobacter'	'Achromobacter deleyi'
'GCF_016127315.1'	'Pseudomonadota'	'Betaproteobacteria'	'Burkholderiales'	'Alcaligenaceae'	'Achromobacter'	'Achromobacter deleyi'
'GCF_016127315.1'	'Pseudomonadota'	'Betaproteobacteria'	'Burkholderiales'	'Alcaligenaceae'	'Achromobacter'	'Achromobacter deleyi'
'GCF_016127315.1'	'Pseudomonadota'	'Betaproteobacteria'	'Burkholderiales'	'Alcaligenaceae'	'Achromobacter'	'Achromobacter deleyi'
'GCF_013116765.2'	'Pseudomonadota'	'Betaproteobacteria'	'Burkholderiales'	'Alcaligenaceae'	'Achromobacter'	'Achromobacter deleyi'
'GCF_013116765.2'	'Pseudomonadota'	'Betaproteobacteria'	'Burkholderiales'	'Alcaligenaceae'	'Achromobacter'	'Achromobacter deleyi'
'GCF_013116765.2'	'Pseudomonadota'	'Betaproteobacteria'	'Burkholderiales'	'Alcaligenaceae'	'Achromobacter'	'Achromobacter deleyi'
'GCF_013116765.2'	'Pseudomonadota'	'Betaproteobacteria'	'Burkholderiales'	'Alcaligenaceae'	'Achromobacter'	'Achromobacter deleyi'
'GCF_013116765.2'	'Pseudomonadota'	'Betaproteobacteria'	'Burkholderiales'	'Alcaligenaceae'	'Achromobacter'	'Achromobacter deleyi'
'GCF_013116765.2'	'Pseudomonadota'	'Betaproteobacteria'	'Burkholderiales'	'Alcaligenaceae'	'Achromobacter'	'Achromobacter deleyi'
'GCF_013116765.2'	'Pseudomonadota'	'Betaproteobacteria'	'Burkholderiales'	'Alcaligenaceae'	'Achromobacter'	'Achromobacter deleyi'
'GCF_013116765.2'	'Pseudomonadota'	'Betaproteobacteria'	'Burkholderiales'	'Alcaligenaceae'	'Achromobacter'	'Achromobacter deleyi'
'GCF_013116765.2'	'Pseudomonadota'	'Betaproteobacteria'	'Burkholderiales'	'Alcaligenaceae'	'Achromobacter'	'Achromobacter deleyi'
'GCF_013116765.2'	'Pseudomonadota'	'Betaproteobacteria'	'Burkholderiales'	'Alcaligenaceae'	'Achromobacter'	'Achromobacter deleyi'
'GCF_013116765.2'	'Pseudomonadota'	'Betaproteobacteria'	'Burkholderiales'	'Alcaligenaceae'	'Achromobacter'	'Achromobacter deleyi'
'GCF_013116765.2'	'Pseudomonadota'	'Betaproteobacteria'	'Burkholderiales'	'Alcaligenaceae'	'Achromobacter'	'Achromobacter deleyi'
'GCF_013116765.2'	'Pseudomonadota'	'Betaproteobacteria'	'Burkholderiales'	'Alcaligenaceae'	'Achromobacter'	'Achromobacter deleyi'
'GCF_013116765.2'	'Pseudomonadota'	'Betaproteobacteria'	'Burkholderiales'	'Alcaligenaceae'	'Achromobacter'	'Achromobacter deleyi'
'GCF_013116765.2'	'Pseudomonadota'	'Betaproteobacteria'	'Burkholderiales'	'Alcaligenaceae'	'Achromobacter'	'Achromobacter deleyi'
'GCF_021432025.1'	'Pseudomonadota'	'Betaproteobacteria'	'Burkholderiales'	'Alcaligenaceae'	'Achromobacter'	'Achromobacter deleyi'
'GCF_021432025.1'	'Pseudomonadota'	'Betaproteobacteria'	'Burkholderiales'	'Alcaligenaceae'	'Achromobacter'	'Achromobacter deleyi'
'GCF_021432025.1'	'Pseudomonadota'	'Betaproteobacteria'	'Burkholderiales'	'Alcaligenaceae'	'Achromobacter'	'Achromobacter deleyi'
'GCF_021432025.1'	'Pseudomonadota'	'Betaproteobacteria'	'Burkholderiales'	'Alcaligenaceae'	'Achromobacter'	'Achromobacter deleyi'
'GCF_021432025.1'	'Pseudomonadota'	'Betaproteobacteria'	'Burkholderiales'	'Alcaligenaceae'	'Achromobacter'	'Achromobacter deleyi'
'GCF_021432025.1'	'Pseudomonadota'	'Betaproteobacteria'	'Burkholderiales'	'Alcaligenaceae'	'Achromobacter'	'Achromobacter deleyi'
'GCF_021432025.1'	'Pseudomonadota'	'Betaproteobacteria'	'Burkholderiales'	'Alcaligenaceae'	'Achromobacter'	'Achromobacter deleyi'
'GCF_021432025.1'	'Pseudomonadota'	'Betaproteobacteria'	'Burkholderiales'	'Alcaligenaceae'	'Achromobacter'	'Achromobacter deleyi'
'GCF_021432025.1'	'Pseudomonadota'	'Betaproteobacteria'	'Burkholderiales'	'Alcaligenaceae'	'Achromobacter'	'Achromobacter deleyi'
'GCF_021432025.1'	'Pseudomonadota'	'Betaproteobacteria'	'Burkholderiales'	'Alcaligenaceae'	'Achromobacter'	'Achromobacter deleyi'
'GCF_021432025.1'	'Pseudomonadota'	'Betaproteobacteria'	'Burkholderiales'	'Alcaligenaceae'	'Achromobacter'	'Achromobacter deleyi'
'GCF_021432025.1'	'Pseudomonadota'	'Betaproteobacteria'	'Burkholderiales'	'Alcaligenaceae'	'Achromobacter'	'Achromobacter deleyi'
'GCF_021432025.1'	'Pseudomonadota'	'Betaproteobacteria'	'Burkholderiales'	'Alcaligenaceae'	'Achromobacter'	'Achromobacter deleyi'
'GCF_021432025.1'	'Pseudomonadota'	'Betaproteobacteria'	'Burkholderiales'	'Alcaligenaceae'	'Achromobacter'	'Achromobacter deleyi'
'GCF_021432025.1'	'Pseudomonadota'	'Betaproteobacteria'	'Burkholderiales'	'Alcaligenaceae'	'Achromobacter'	'Achromobacter deleyi'
'GCF_022807955.1'	'Pseudomonadota'	'Betaproteobacteria'	'Burkholderiales'	'Comamonadaceae'	'Diaphorobacter'	'[Acidovorax] ebreus'
'GCF_022807955.1'	'Pseudomonadota'	'Betaproteobacteria'	'Burkholderiales'	'Comamonadaceae'	'Diaphorobacter'	'[Acidovorax] ebreus'
'GCF_022807955.1'	'Pseudomonadota'	'Betaproteobacteria'	'Burkholderiales'	'Comamonadaceae'	'Diaphorobacter'	'[Acidovorax] ebreus'
'GCF_013267355.1'	'Pseudomonadota'	'Betaproteobacteria'	'Burkholderiales'	'Alcaligenaceae'	'Achromobacter'	'Achromobacter pestifer'
'GCF_013267355.1'	'Pseudomonadota'	'Betaproteobacteria'	'Burkholderiales'	'Alcaligenaceae'	'Achromobacter'	'Achromobacter pestifer'
'GCF_013267355.1'	'Pseudomonadota'	'Betaproteobacteria'	'Burkholderiales'	'Alcaligenaceae'	'Achromobacter'	'Achromobacter pestifer'
'GCF_013267355.1'	'Pseudomonadota'	'Betaproteobacteria'	'Burkholderiales'	'Alcaligenaceae'	'Achromobacter'	'Achromobacter pestifer'
'GCF_013267355.1'	'Pseudomonadota'	'Betaproteobacteria'	'Burkholderiales'	'Alcaligenaceae'	'Achromobacter'	'Achromobacter pestifer'
'GCF_013267355.1'	'Pseudomonadota'	'Betaproteobacteria'	'Burkholderiales'	'Alcaligenaceae'	'Achromobacter'	'Achromobacter pestifer'
'GCF_013267355.1'	'Pseudomonadota'	'Betaproteobacteria'	'Burkholderiales'	'Alcaligenaceae'	'Achromobacter'	'Achromobacter pestifer'
'GCF_013267355.1'	'Pseudomonadota'	'Betaproteobacteria'	'Burkholderiales'	'Alcaligenaceae'	'Achromobacter'	'Achromobacter pestifer'
'GCF_013267355.1'	'Pseudomonadota'	'Betaproteobacteria'	'Burkholderiales'	'Alcaligenaceae'	'Achromobacter'	'Achromobacter pestifer'
'GCF_013267355.1'	'Pseudomonadota'	'Betaproteobacteria'	'Burkholderiales'	'Alcaligenaceae'	'Achromobacter'	'Achromobacter pestifer'
'GCF_013267355.1'	'Pseudomonadota'	'Betaproteobacteria'	'Burkholderiales'	'Alcaligenaceae'	'Achromobacter'	'Achromobacter pestifer'
'GCF_013267355.1'	'Pseudomonadota'	'Betaproteobacteria'	'Burkholderiales'	'Alcaligenaceae'	'Achromobacter'	'Achromobacter pestifer'
'GCF_013267355.1'	'Pseudomonadota'	'Betaproteobacteria'	'Burkholderiales'	'Alcaligenaceae'	'Achromobacter'	'Achromobacter pestifer'
'GCF_013267355.1'	'Pseudomonadota'	'Betaproteobacteria'	'Burkholderiales'	'Alcaligenaceae'	'Achromobacter'	'Achromobacter pestifer'
'GCF_013267355.1'	'Pseudomonadota'	'Betaproteobacteria'	'Burkholderiales'	'Alcaligenaceae'	'Achromobacter'	'Achromobacter pestifer'
'GCF_013267355.1'	'Pseudomonadota'	'Betaproteobacteria'	'Burkholderiales'	'Alcaligenaceae'	'Achromobacter'	'Achromobacter pestifer'
'GCF_013267355.1'	'Pseudomonadota'	'Betaproteobacteria'	'Burkholderiales'	'Alcaligenaceae'	'Achromobacter'	'Achromobacter pestifer'
'GCF_013267355.1'	'Pseudomonadota'	'Betaproteobacteria'	'Burkholderiales'	'Alcaligenaceae'	'Achromobacter'	'Achromobacter pestifer'
'GCF_013267355.1'	'Pseudomonadota'	'Betaproteobacteria'	'Burkholderiales'	'Alcaligenaceae'	'Achromobacter'	'Achromobacter pestifer'
'GCF_013267355.1'	'Pseudomonadota'	'Betaproteobacteria'	'Burkholderiales'	'Alcaligenaceae'	'Achromobacter'	'Achromobacter pestifer'
'GCF_013267355.1'	'Pseudomonadota'	'Betaproteobacteria'	'Burkholderiales'	'Alcaligenaceae'	'Achromobacter'	'Achromobacter pestifer'
'GCF_013267355.1'	'Pseudomonadota'	'Betaproteobacteria'	'Burkholderiales'	'Alcaligenaceae'	'Achromobacter'	'Achromobacter pestifer'
'GCF_013267355.1'	'Pseudomonadota'	'Betaproteobacteria'	'Burkholderiales'	'Alcaligenaceae'	'Achromobacter'	'Achromobacter pestifer'
'GCF_013267355.1'	'Pseudomonadota'	'Betaproteobacteria'	'Burkholderiales'	'Alcaligenaceae'	'Achromobacter'	'Achromobacter pestifer'
'GCF_013267355.1'	'Pseudomonadota'	'Betaproteobacteria'	'Burkholderiales'	'Alcaligenaceae'	'Achromobacter'	'Achromobacter pestifer'
'GCF_002902905.1'	'Pseudomonadota'	'Betaproteobacteria'	'Burkholderiales'	'Alcaligenaceae'	'Achromobacter'	'Achromobacter sp. AONIH1'
'GCF_002902905.1'	'Pseudomonadota'	'Betaproteobacteria'	'Burkholderiales'	'Alcaligenaceae'	'Achromobacter'	'Achromobacter sp. AONIH1'
'GCF_002902905.1'	'Pseudomonadota'	'Betaproteobacteria'	'Burkholderiales'	'Alcaligenaceae'	'Achromobacter'	'Achromobacter sp. AONIH1'
'GCF_019448355.1'	'Pseudomonadota'	'Betaproteobacteria'	'Burkholderiales'	'Alcaligenaceae'	'Achromobacter'	'Achromobacter sp. ES-001'
'GCF_019448355.1'	'Pseudomonadota'	'Betaproteobacteria'	'Burkholderiales'	'Alcaligenaceae'	'Achromobacter'	'Achromobacter sp. ES-001'
'GCF_019448355.1'	'Pseudomonadota'	'Betaproteobacteria'	'Burkholderiales'	'Alcaligenaceae'	'Achromobacter'	'Achromobacter sp. ES-001'
'GCF_019448355.1'	'Pseudomonadota'	'Betaproteobacteria'	'Burkholderiales'	'Alcaligenaceae'	'Achromobacter'	'Achromobacter sp. ES-001'
'GCF_019448355.1'	'Pseudomonadota'	'Betaproteobacteria'	'Burkholderiales'	'Alcaligenaceae'	'Achromobacter'	'Achromobacter sp. ES-001'
'GCF_019448355.1'	'Pseudomonadota'	'Betaproteobacteria'	'Burkholderiales'	'Alcaligenaceae'	'Achromobacter'	'Achromobacter sp. ES-001'
'GCF_019448355.1'	'Pseudomonadota'	'Betaproteobacteria'	'Burkholderiales'	'Alcaligenaceae'	'Achromobacter'	'Achromobacter sp. ES-001'
'GCF_029495675.1'	'Pseudomonadota'	'Betaproteobacteria'	'Burkholderiales'	'Alcaligenaceae'	'Achromobacter'	'Achromobacter sp. SS2-2022'
'GCF_029495675.1'	'Pseudomonadota'	'Betaproteobacteria'	'Burkholderiales'	'Alcaligenaceae'	'Achromobacter'	'Achromobacter sp. SS2-2022'
'GCF_029495675.1'	'Pseudomonadota'	'Betaproteobacteria'	'Burkholderiales'	'Alcaligenaceae'	'Achromobacter'	'Achromobacter sp. SS2-2022'
'GCF_029495675.1'	'Pseudomonadota'	'Betaproteobacteria'	'Burkholderiales'	'Alcaligenaceae'	'Achromobacter'	'Achromobacter sp. SS2-2022'
'GCF_029495675.1'	'Pseudomonadota'	'Betaproteobacteria'	'Burkholderiales'	'Alcaligenaceae'	'Achromobacter'	'Achromobacter sp. SS2-2022'
'GCF_029495675.1'	'Pseudomonadota'	'Betaproteobacteria'	'Burkholderiales'	'Alcaligenaceae'	'Achromobacter'	'Achromobacter sp. SS2-2022'
'GCF_029495675.1'	'Pseudomonadota'	'Betaproteobacteria'	'Burkholderiales'	'Alcaligenaceae'	'Achromobacter'	'Achromobacter sp. SS2-2022'
'GCF_029495675.1'	'Pseudomonadota'	'Betaproteobacteria'	'Burkholderiales'	'Alcaligenaceae'	'Achromobacter'	'Achromobacter sp. SS2-2022'
'GCF_029495675.1'	'Pseudomonadota'	'Betaproteobacteria'	'Burkholderiales'	'Alcaligenaceae'	'Achromobacter'	'Achromobacter sp. SS2-2022'
'GCF_003600685.1'	'Pseudomonadota'	'Betaproteobacteria'	'Burkholderiales'	'Alcaligenaceae'	'Achromobacter'	'Achromobacter sp. B7'
'GCF_003600685.1'	'Pseudomonadota'	'Betaproteobacteria'	'Burkholderiales'	'Alcaligenaceae'	'Achromobacter'	'Achromobacter sp. B7'
'GCF_003600685.1'	'Pseudomonadota'	'Betaproteobacteria'	'Burkholderiales'	'Alcaligenaceae'	'Achromobacter'	'Achromobacter sp. B7'
'GCF_003600685.1'	'Pseudomonadota'	'Betaproteobacteria'	'Burkholderiales'	'Alcaligenaceae'	'Achromobacter'	'Achromobacter sp. B7'
'GCF_003600685.1'	'Pseudomonadota'	'Betaproteobacteria'	'Burkholderiales'	'Alcaligenaceae'	'Achromobacter'	'Achromobacter sp. B7'
'GCF_003600685.1'	'Pseudomonadota'	'Betaproteobacteria'	'Burkholderiales'	'Alcaligenaceae'	'Achromobacter'	'Achromobacter sp. B7'
'GCF_003600685.1'	'Pseudomonadota'	'Betaproteobacteria'	'Burkholderiales'	'Alcaligenaceae'	'Achromobacter'	'Achromobacter sp. B7'
'GCF_020541125.1'	'Pseudomonadota'	'Betaproteobacteria'	'Burkholderiales'	'Alcaligenaceae'	'Achromobacter'	'Achromobacter sp. 77'
'GCF_020541125.1'	'Pseudomonadota'	'Betaproteobacteria'	'Burkholderiales'	'Alcaligenaceae'	'Achromobacter'	'Achromobacter sp. 77'
'GCF_020541125.1'	'Pseudomonadota'	'Betaproteobacteria'	'Burkholderiales'	'Alcaligenaceae'	'Achromobacter'	'Achromobacter sp. 77'
'GCF_020541125.1'	'Pseudomonadota'	'Betaproteobacteria'	'Burkholderiales'	'Alcaligenaceae'	'Achromobacter'	'Achromobacter sp. 77'
'GCF_020541125.1'	'Pseudomonadota'	'Betaproteobacteria'	'Burkholderiales'	'Alcaligenaceae'	'Achromobacter'	'Achromobacter sp. 77'
'GCF_020541125.1'	'Pseudomonadota'	'Betaproteobacteria'	'Burkholderiales'	'Alcaligenaceae'	'Achromobacter'	'Achromobacter sp. 77'
'GCF_020541125.1'	'Pseudomonadota'	'Betaproteobacteria'	'Burkholderiales'	'Alcaligenaceae'	'Achromobacter'	'Achromobacter sp. 77'
'GCF_020541125.1'	'Pseudomonadota'	'Betaproteobacteria'	'Burkholderiales'	'Alcaligenaceae'	'Achromobacter'	'Achromobacter sp. 77'
'GCF_020541125.1'	'Pseudomonadota'	'Betaproteobacteria'	'Burkholderiales'	'Alcaligenaceae'	'Achromobacter'	'Achromobacter sp. 77'
'GCF_002006565.1'	'Pseudomonadota'	'Alphaproteobacteria'	'Rhodospirillales'	'Acetobacteraceae'	'Acetobacter'	'Acetobacter persici'
'GCF_002006565.1'	'Pseudomonadota'	'Alphaproteobacteria'	'Rhodospirillales'	'Acetobacteraceae'	'Acetobacter'	'Acetobacter persici'
'GCF_002006565.1'	'Pseudomonadota'	'Alphaproteobacteria'	'Rhodospirillales'	'Acetobacteraceae'	'Acetobacter'	'Acetobacter persici'
'GCF_003323795.1'	'Pseudomonadota'	'Alphaproteobacteria'	'Rhodospirillales'	'Acetobacteraceae'	'Acetobacter'	'Acetobacter sp. JWB'
'GCF_000176855.2'	'Pseudomonadota'	'Betaproteobacteria'	'Burkholderiales'	'Comamonadaceae'	'Acidovorax'	'Acidovorax avenae'
'GCF_000176855.2'	'Pseudomonadota'	'Betaproteobacteria'	'Burkholderiales'	'Comamonadaceae'	'Acidovorax'	'Acidovorax avenae'
'GCF_000176855.2'	'Pseudomonadota'	'Betaproteobacteria'	'Burkholderiales'	'Comamonadaceae'	'Acidovorax'	'Acidovorax avenae'
'GCF_000176855.2'	'Pseudomonadota'	'Betaproteobacteria'	'Burkholderiales'	'Comamonadaceae'	'Acidovorax'	'Acidovorax avenae'
'GCF_000176855.2'	'Pseudomonadota'	'Betaproteobacteria'	'Burkholderiales'	'Comamonadaceae'	'Acidovorax'	'Acidovorax avenae'
'GCF_000176855.2'	'Pseudomonadota'	'Betaproteobacteria'	'Burkholderiales'	'Comamonadaceae'	'Acidovorax'	'Acidovorax avenae'
'GCF_000176855.2'	'Pseudomonadota'	'Betaproteobacteria'	'Burkholderiales'	'Comamonadaceae'	'Acidovorax'	'Acidovorax avenae'
'GCF_000022565.1'	'Acidobacteriota'	'Terriglobia'	'Terriglobales'	'Acidobacteriaceae'	'Acidobacterium'	'Acidobacterium capsulatum'
'GCF_014489595.1'	'Pseudomonadota'	'Betaproteobacteria'	'Burkholderiales'	'Comamonadaceae'	'Acidovorax'	'Acidovorax monticola'
'GCF_014489595.1'	'Pseudomonadota'	'Betaproteobacteria'	'Burkholderiales'	'Comamonadaceae'	'Acidovorax'	'Acidovorax monticola'
'GCF_014489595.1'	'Pseudomonadota'	'Betaproteobacteria'	'Burkholderiales'	'Comamonadaceae'	'Acidovorax'	'Acidovorax monticola'
'GCF_013363755.1'	'Pseudomonadota'	'Betaproteobacteria'	'Burkholderiales'	'Comamonadaceae'	'Acidovorax'	'Acidovorax antarcticus'
'GCF_013363755.1'	'Pseudomonadota'	'Betaproteobacteria'	'Burkholderiales'	'Comamonadaceae'	'Acidovorax'	'Acidovorax antarcticus'
'GCF_013363755.1'	'Pseudomonadota'	'Betaproteobacteria'	'Burkholderiales'	'Comamonadaceae'	'Acidovorax'	'Acidovorax antarcticus'
'GCF_013363755.1'	'Pseudomonadota'	'Betaproteobacteria'	'Burkholderiales'	'Comamonadaceae'	'Acidovorax'	'Acidovorax antarcticus'
'GCF_013363755.1'	'Pseudomonadota'	'Betaproteobacteria'	'Burkholderiales'	'Comamonadaceae'	'Acidovorax'	'Acidovorax antarcticus'
'GCF_013363755.1'	'Pseudomonadota'	'Betaproteobacteria'	'Burkholderiales'	'Comamonadaceae'	'Acidovorax'	'Acidovorax antarcticus'
'GCF_013363755.1'	'Pseudomonadota'	'Betaproteobacteria'	'Burkholderiales'	'Comamonadaceae'	'Acidovorax'	'Acidovorax antarcticus'
'GCF_013363755.1'	'Pseudomonadota'	'Betaproteobacteria'	'Burkholderiales'	'Comamonadaceae'	'Acidovorax'	'Acidovorax antarcticus'
'GCF_013363755.1'	'Pseudomonadota'	'Betaproteobacteria'	'Burkholderiales'	'Comamonadaceae'	'Acidovorax'	'Acidovorax antarcticus'
'GCF_013363755.1'	'Pseudomonadota'	'Betaproteobacteria'	'Burkholderiales'	'Comamonadaceae'	'Acidovorax'	'Acidovorax antarcticus'
'GCF_008632635.1'	'Pseudomonadota'	'Gammaproteobacteria'	'Moraxellales'	'Moraxellaceae'	'Acinetobacter'	'Acinetobacter baumannii'
'GCF_008632635.1'	'Pseudomonadota'	'Gammaproteobacteria'	'Moraxellales'	'Moraxellaceae'	'Acinetobacter'	'Acinetobacter baumannii'
'GCF_008632635.1'	'Pseudomonadota'	'Gammaproteobacteria'	'Moraxellales'	'Moraxellaceae'	'Acinetobacter'	'Acinetobacter baumannii'
'GCF_022493915.1'	'Pseudomonadota'	'Betaproteobacteria'	'Burkholderiales'	'Comamonadaceae'	'Acidovorax'	'Acidovorax citrulli'
'GCF_022493915.1'	'Pseudomonadota'	'Betaproteobacteria'	'Burkholderiales'	'Comamonadaceae'	'Acidovorax'	'Acidovorax citrulli'
'GCF_022493915.1'	'Pseudomonadota'	'Betaproteobacteria'	'Burkholderiales'	'Comamonadaceae'	'Acidovorax'	'Acidovorax citrulli'
'GCF_028596105.1'	'Pseudomonadota'	'Betaproteobacteria'	'Burkholderiales'	'Comamonadaceae'	'Acidovorax'	'Acidovorax temperans'
'GCF_009035845.1'	'Pseudomonadota'	'Gammaproteobacteria'	'Moraxellales'	'Moraxellaceae'	'Acinetobacter'	'Acinetobacter baumannii'
'GCF_009035845.1'	'Pseudomonadota'	'Gammaproteobacteria'	'Moraxellales'	'Moraxellaceae'	'Acinetobacter'	'Acinetobacter baumannii'
'GCF_009035845.1'	'Pseudomonadota'	'Gammaproteobacteria'	'Moraxellales'	'Moraxellaceae'	'Acinetobacter'	'Acinetobacter baumannii'
'GCF_009759685.1'	'Pseudomonadota'	'Gammaproteobacteria'	'Moraxellales'	'Moraxellaceae'	'Acinetobacter'	'Acinetobacter baumannii'
'GCF_009759685.1'	'Pseudomonadota'	'Gammaproteobacteria'	'Moraxellales'	'Moraxellaceae'	'Acinetobacter'	'Acinetobacter baumannii'
'GCF_009759685.1'	'Pseudomonadota'	'Gammaproteobacteria'	'Moraxellales'	'Moraxellaceae'	'Acinetobacter'	'Acinetobacter baumannii'
'GCF_000746645.1'	'Pseudomonadota'	'Gammaproteobacteria'	'Moraxellales'	'Moraxellaceae'	'Acinetobacter'	'Acinetobacter baumannii'
'GCF_000746645.1'	'Pseudomonadota'	'Gammaproteobacteria'	'Moraxellales'	'Moraxellaceae'	'Acinetobacter'	'Acinetobacter baumannii'
'GCF_000746645.1'	'Pseudomonadota'	'Gammaproteobacteria'	'Moraxellales'	'Moraxellaceae'	'Acinetobacter'	'Acinetobacter baumannii'
'GCF_001896005.1'	'Pseudomonadota'	'Gammaproteobacteria'	'Moraxellales'	'Moraxellaceae'	'Acinetobacter'	'Acinetobacter baumannii'
'GCF_001896005.1'	'Pseudomonadota'	'Gammaproteobacteria'	'Moraxellales'	'Moraxellaceae'	'Acinetobacter'	'Acinetobacter baumannii'
'GCF_001896005.1'	'Pseudomonadota'	'Gammaproteobacteria'	'Moraxellales'	'Moraxellaceae'	'Acinetobacter'	'Acinetobacter baumannii'
'GCF_003010675.1'	'Pseudomonadota'	'Gammaproteobacteria'	'Moraxellales'	'Moraxellaceae'	'Acinetobacter'	'Acinetobacter baumannii'
'GCF_003010675.1'	'Pseudomonadota'	'Gammaproteobacteria'	'Moraxellales'	'Moraxellaceae'	'Acinetobacter'	'Acinetobacter baumannii'
'GCF_003010675.1'	'Pseudomonadota'	'Gammaproteobacteria'	'Moraxellales'	'Moraxellaceae'	'Acinetobacter'	'Acinetobacter baumannii'
'GCF_003812485.1'	'Pseudomonadota'	'Gammaproteobacteria'	'Moraxellales'	'Moraxellaceae'	'Acinetobacter'	'Acinetobacter baumannii'
'GCF_003812485.1'	'Pseudomonadota'	'Gammaproteobacteria'	'Moraxellales'	'Moraxellaceae'	'Acinetobacter'	'Acinetobacter baumannii'
'GCF_003812485.1'	'Pseudomonadota'	'Gammaproteobacteria'	'Moraxellales'	'Moraxellaceae'	'Acinetobacter'	'Acinetobacter baumannii'
'GCF_001578145.1'	'Pseudomonadota'	'Gammaproteobacteria'	'Moraxellales'	'Moraxellaceae'	'Acinetobacter'	'Acinetobacter baumannii'
'GCF_001578145.1'	'Pseudomonadota'	'Gammaproteobacteria'	'Moraxellales'	'Moraxellaceae'	'Acinetobacter'	'Acinetobacter baumannii'
'GCF_001578145.1'	'Pseudomonadota'	'Gammaproteobacteria'	'Moraxellales'	'Moraxellaceae'	'Acinetobacter'	'Acinetobacter baumannii'
'GCF_003431385.1'	'Pseudomonadota'	'Gammaproteobacteria'	'Moraxellales'	'Moraxellaceae'	'Acinetobacter'	'Acinetobacter baumannii'
'GCF_003431385.1'	'Pseudomonadota'	'Gammaproteobacteria'	'Moraxellales'	'Moraxellaceae'	'Acinetobacter'	'Acinetobacter baumannii'
'GCF_003431385.1'	'Pseudomonadota'	'Gammaproteobacteria'	'Moraxellales'	'Moraxellaceae'	'Acinetobacter'	'Acinetobacter baumannii'
'GCF_002996805.1'	'Pseudomonadota'	'Gammaproteobacteria'	'Moraxellales'	'Moraxellaceae'	'Acinetobacter'	'Acinetobacter baumannii'
'GCF_002996805.1'	'Pseudomonadota'	'Gammaproteobacteria'	'Moraxellales'	'Moraxellaceae'	'Acinetobacter'	'Acinetobacter baumannii'
'GCF_002996805.1'	'Pseudomonadota'	'Gammaproteobacteria'	'Moraxellales'	'Moraxellaceae'	'Acinetobacter'	'Acinetobacter baumannii'
'GCF_005518095.1'	'Pseudomonadota'	'Gammaproteobacteria'	'Moraxellales'	'Moraxellaceae'	'Acinetobacter'	'Acinetobacter baumannii'
'GCF_005518095.1'	'Pseudomonadota'	'Gammaproteobacteria'	'Moraxellales'	'Moraxellaceae'	'Acinetobacter'	'Acinetobacter baumannii'
'GCF_006385075.1'	'Pseudomonadota'	'Gammaproteobacteria'	'Moraxellales'	'Moraxellaceae'	'Acinetobacter'	'Acinetobacter baumannii'
'GCF_006385075.1'	'Pseudomonadota'	'Gammaproteobacteria'	'Moraxellales'	'Moraxellaceae'	'Acinetobacter'	'Acinetobacter baumannii'
'GCF_006385075.1'	'Pseudomonadota'	'Gammaproteobacteria'	'Moraxellales'	'Moraxellaceae'	'Acinetobacter'	'Acinetobacter baumannii'
'GCF_003522665.1'	'Pseudomonadota'	'Gammaproteobacteria'	'Moraxellales'	'Moraxellaceae'	'Acinetobacter'	'Acinetobacter baumannii'
'GCF_003522665.1'	'Pseudomonadota'	'Gammaproteobacteria'	'Moraxellales'	'Moraxellaceae'	'Acinetobacter'	'Acinetobacter baumannii'
'GCF_003522665.1'	'Pseudomonadota'	'Gammaproteobacteria'	'Moraxellales'	'Moraxellaceae'	'Acinetobacter'	'Acinetobacter baumannii'
'GCF_003264275.1'	'Pseudomonadota'	'Gammaproteobacteria'	'Moraxellales'	'Moraxellaceae'	'Acinetobacter'	'Acinetobacter baumannii'
'GCF_003264275.1'	'Pseudomonadota'	'Gammaproteobacteria'	'Moraxellales'	'Moraxellaceae'	'Acinetobacter'	'Acinetobacter baumannii'
'GCF_003264275.1'	'Pseudomonadota'	'Gammaproteobacteria'	'Moraxellales'	'Moraxellaceae'	'Acinetobacter'	'Acinetobacter baumannii'
'GCF_003431865.1'	'Pseudomonadota'	'Gammaproteobacteria'	'Moraxellales'	'Moraxellaceae'	'Acinetobacter'	'Acinetobacter baumannii'
'GCF_003431865.1'	'Pseudomonadota'	'Gammaproteobacteria'	'Moraxellales'	'Moraxellaceae'	'Acinetobacter'	'Acinetobacter baumannii'
'GCF_003431865.1'	'Pseudomonadota'	'Gammaproteobacteria'	'Moraxellales'	'Moraxellaceae'	'Acinetobacter'	'Acinetobacter baumannii'
'GCF_009455505.1'	'Pseudomonadota'	'Gammaproteobacteria'	'Moraxellales'	'Moraxellaceae'	'Acinetobacter'	'Acinetobacter baumannii'
'GCF_009455505.1'	'Pseudomonadota'	'Gammaproteobacteria'	'Moraxellales'	'Moraxellaceae'	'Acinetobacter'	'Acinetobacter baumannii'
'GCF_009455505.1'	'Pseudomonadota'	'Gammaproteobacteria'	'Moraxellales'	'Moraxellaceae'	'Acinetobacter'	'Acinetobacter baumannii'
'GCF_003345235.1'	'Pseudomonadota'	'Gammaproteobacteria'	'Moraxellales'	'Moraxellaceae'	'Acinetobacter'	'Acinetobacter baumannii'
'GCF_003345235.1'	'Pseudomonadota'	'Gammaproteobacteria'	'Moraxellales'	'Moraxellaceae'	'Acinetobacter'	'Acinetobacter baumannii'
'GCF_003345235.1'	'Pseudomonadota'	'Gammaproteobacteria'	'Moraxellales'	'Moraxellaceae'	'Acinetobacter'	'Acinetobacter baumannii'
'GCF_001026965.1'	'Pseudomonadota'	'Gammaproteobacteria'	'Moraxellales'	'Moraxellaceae'	'Acinetobacter'	'Acinetobacter baumannii'
'GCF_001026965.1'	'Pseudomonadota'	'Gammaproteobacteria'	'Moraxellales'	'Moraxellaceae'	'Acinetobacter'	'Acinetobacter baumannii'
'GCF_001026965.1'	'Pseudomonadota'	'Gammaproteobacteria'	'Moraxellales'	'Moraxellaceae'	'Acinetobacter'	'Acinetobacter baumannii'
'GCF_001514375.1'	'Pseudomonadota'	'Gammaproteobacteria'	'Moraxellales'	'Moraxellaceae'	'Acinetobacter'	'Acinetobacter baumannii'
'GCF_001514375.1'	'Pseudomonadota'	'Gammaproteobacteria'	'Moraxellales'	'Moraxellaceae'	'Acinetobacter'	'Acinetobacter baumannii'
'GCF_001514375.1'	'Pseudomonadota'	'Gammaproteobacteria'	'Moraxellales'	'Moraxellaceae'	'Acinetobacter'	'Acinetobacter baumannii'
'GCF_005280435.1'	'Pseudomonadota'	'Gammaproteobacteria'	'Moraxellales'	'Moraxellaceae'	'Acinetobacter'	'Acinetobacter baumannii'
'GCF_005280435.1'	'Pseudomonadota'	'Gammaproteobacteria'	'Moraxellales'	'Moraxellaceae'	'Acinetobacter'	'Acinetobacter baumannii'
'GCF_003547115.1'	'Pseudomonadota'	'Gammaproteobacteria'	'Moraxellales'	'Moraxellaceae'	'Acinetobacter'	'Acinetobacter baumannii'
'GCF_003547115.1'	'Pseudomonadota'	'Gammaproteobacteria'	'Moraxellales'	'Moraxellaceae'	'Acinetobacter'	'Acinetobacter baumannii'
'GCF_003547115.1'	'Pseudomonadota'	'Gammaproteobacteria'	'Moraxellales'	'Moraxellaceae'	'Acinetobacter'	'Acinetobacter baumannii'
'GCF_002082785.1'	'Pseudomonadota'	'Gammaproteobacteria'	'Moraxellales'	'Moraxellaceae'	'Acinetobacter'	'Acinetobacter baumannii'
'GCF_002082785.1'	'Pseudomonadota'	'Gammaproteobacteria'	'Moraxellales'	'Moraxellaceae'	'Acinetobacter'	'Acinetobacter baumannii'
'GCF_002082785.1'	'Pseudomonadota'	'Gammaproteobacteria'	'Moraxellales'	'Moraxellaceae'	'Acinetobacter'	'Acinetobacter baumannii'
'GCF_001543995.1'	'Pseudomonadota'	'Gammaproteobacteria'	'Moraxellales'	'Moraxellaceae'	'Acinetobacter'	'Acinetobacter baumannii'
'GCF_001543995.1'	'Pseudomonadota'	'Gammaproteobacteria'	'Moraxellales'	'Moraxellaceae'	'Acinetobacter'	'Acinetobacter baumannii'
'GCF_001543995.1'	'Pseudomonadota'	'Gammaproteobacteria'	'Moraxellales'	'Moraxellaceae'	'Acinetobacter'	'Acinetobacter baumannii'
'GCF_012272755.1'	'Pseudomonadota'	'Gammaproteobacteria'	'Moraxellales'	'Moraxellaceae'	'Acinetobacter'	'Acinetobacter baumannii'
'GCF_012272755.1'	'Pseudomonadota'	'Gammaproteobacteria'	'Moraxellales'	'Moraxellaceae'	'Acinetobacter'	'Acinetobacter baumannii'
'GCF_012272755.1'	'Pseudomonadota'	'Gammaproteobacteria'	'Moraxellales'	'Moraxellaceae'	'Acinetobacter'	'Acinetobacter baumannii'
'GCF_001399655.1'	'Pseudomonadota'	'Gammaproteobacteria'	'Moraxellales'	'Moraxellaceae'	'Acinetobacter'	'Acinetobacter baumannii'
'GCF_001399655.1'	'Pseudomonadota'	'Gammaproteobacteria'	'Moraxellales'	'Moraxellaceae'	'Acinetobacter'	'Acinetobacter baumannii'
'GCF_001399655.1'	'Pseudomonadota'	'Gammaproteobacteria'	'Moraxellales'	'Moraxellaceae'	'Acinetobacter'	'Acinetobacter baumannii'
'GCF_002753915.1'	'Pseudomonadota'	'Gammaproteobacteria'	'Moraxellales'	'Moraxellaceae'	'Acinetobacter'	'Acinetobacter baumannii'
'GCF_002753915.1'	'Pseudomonadota'	'Gammaproteobacteria'	'Moraxellales'	'Moraxellaceae'	'Acinetobacter'	'Acinetobacter baumannii'
'GCF_002753915.1'	'Pseudomonadota'	'Gammaproteobacteria'	'Moraxellales'	'Moraxellaceae'	'Acinetobacter'	'Acinetobacter baumannii'
'GCF_003948085.2'	'Pseudomonadota'	'Gammaproteobacteria'	'Moraxellales'	'Moraxellaceae'	'Acinetobacter'	'Acinetobacter baumannii'
'GCF_003948085.2'	'Pseudomonadota'	'Gammaproteobacteria'	'Moraxellales'	'Moraxellaceae'	'Acinetobacter'	'Acinetobacter baumannii'
'GCF_003948085.2'	'Pseudomonadota'	'Gammaproteobacteria'	'Moraxellales'	'Moraxellaceae'	'Acinetobacter'	'Acinetobacter baumannii'
'GCF_003949115.2'	'Pseudomonadota'	'Gammaproteobacteria'	'Moraxellales'	'Moraxellaceae'	'Acinetobacter'	'Acinetobacter baumannii'
'GCF_003949115.2'	'Pseudomonadota'	'Gammaproteobacteria'	'Moraxellales'	'Moraxellaceae'	'Acinetobacter'	'Acinetobacter baumannii'
'GCF_003949115.2'	'Pseudomonadota'	'Gammaproteobacteria'	'Moraxellales'	'Moraxellaceae'	'Acinetobacter'	'Acinetobacter baumannii'
'GCF_003006035.1'	'Pseudomonadota'	'Gammaproteobacteria'	'Moraxellales'	'Moraxellaceae'	'Acinetobacter'	'Acinetobacter baumannii'
'GCF_003006035.1'	'Pseudomonadota'	'Gammaproteobacteria'	'Moraxellales'	'Moraxellaceae'	'Acinetobacter'	'Acinetobacter baumannii'
'GCF_003006035.1'	'Pseudomonadota'	'Gammaproteobacteria'	'Moraxellales'	'Moraxellaceae'	'Acinetobacter'	'Acinetobacter baumannii'
'GCF_002210065.1'	'Pseudomonadota'	'Gammaproteobacteria'	'Moraxellales'	'Moraxellaceae'	'Acinetobacter'	'Acinetobacter baumannii'
'GCF_002210065.1'	'Pseudomonadota'	'Gammaproteobacteria'	'Moraxellales'	'Moraxellaceae'	'Acinetobacter'	'Acinetobacter baumannii'
'GCF_002210065.1'	'Pseudomonadota'	'Gammaproteobacteria'	'Moraxellales'	'Moraxellaceae'	'Acinetobacter'	'Acinetobacter baumannii'
'GCF_012272735.1'	'Pseudomonadota'	'Gammaproteobacteria'	'Moraxellales'	'Moraxellaceae'	'Acinetobacter'	'Acinetobacter baumannii'
'GCF_012272735.1'	'Pseudomonadota'	'Gammaproteobacteria'	'Moraxellales'	'Moraxellaceae'	'Acinetobacter'	'Acinetobacter baumannii'
'GCF_005280715.1'	'Pseudomonadota'	'Gammaproteobacteria'	'Moraxellales'	'Moraxellaceae'	'Acinetobacter'	'Acinetobacter baumannii'
'GCF_005280715.1'	'Pseudomonadota'	'Gammaproteobacteria'	'Moraxellales'	'Moraxellaceae'	'Acinetobacter'	'Acinetobacter baumannii'
'GCF_005280715.1'	'Pseudomonadota'	'Gammaproteobacteria'	'Moraxellales'	'Moraxellaceae'	'Acinetobacter'	'Acinetobacter baumannii'
'GCF_003522785.1'	'Pseudomonadota'	'Gammaproteobacteria'	'Moraxellales'	'Moraxellaceae'	'Acinetobacter'	'Acinetobacter baumannii'
'GCF_003522785.1'	'Pseudomonadota'	'Gammaproteobacteria'	'Moraxellales'	'Moraxellaceae'	'Acinetobacter'	'Acinetobacter baumannii'
'GCF_003522785.1'	'Pseudomonadota'	'Gammaproteobacteria'	'Moraxellales'	'Moraxellaceae'	'Acinetobacter'	'Acinetobacter baumannii'
'GCF_009498335.1'	'Pseudomonadota'	'Gammaproteobacteria'	'Moraxellales'	'Moraxellaceae'	'Acinetobacter'	'Acinetobacter baumannii'
'GCF_009498335.1'	'Pseudomonadota'	'Gammaproteobacteria'	'Moraxellales'	'Moraxellaceae'	'Acinetobacter'	'Acinetobacter baumannii'
'GCF_009498335.1'	'Pseudomonadota'	'Gammaproteobacteria'	'Moraxellales'	'Moraxellaceae'	'Acinetobacter'	'Acinetobacter baumannii'
'GCF_002947845.1'	'Pseudomonadota'	'Gammaproteobacteria'	'Moraxellales'	'Moraxellaceae'	'Acinetobacter'	'Acinetobacter baumannii'
'GCF_002947845.1'	'Pseudomonadota'	'Gammaproteobacteria'	'Moraxellales'	'Moraxellaceae'	'Acinetobacter'	'Acinetobacter baumannii'
'GCF_002947845.1'	'Pseudomonadota'	'Gammaproteobacteria'	'Moraxellales'	'Moraxellaceae'	'Acinetobacter'	'Acinetobacter baumannii'
'GCF_001887305.1'	'Pseudomonadota'	'Gammaproteobacteria'	'Moraxellales'	'Moraxellaceae'	'Acinetobacter'	'Acinetobacter baumannii'
'GCF_001887305.1'	'Pseudomonadota'	'Gammaproteobacteria'	'Moraxellales'	'Moraxellaceae'	'Acinetobacter'	'Acinetobacter baumannii'
'GCF_001887305.1'	'Pseudomonadota'	'Gammaproteobacteria'	'Moraxellales'	'Moraxellaceae'	'Acinetobacter'	'Acinetobacter baumannii'
'GCF_004758865.1'	'Pseudomonadota'	'Gammaproteobacteria'	'Moraxellales'	'Moraxellaceae'	'Acinetobacter'	'Acinetobacter baumannii'
'GCF_004758865.1'	'Pseudomonadota'	'Gammaproteobacteria'	'Moraxellales'	'Moraxellaceae'	'Acinetobacter'	'Acinetobacter baumannii'
'GCF_004758865.1'	'Pseudomonadota'	'Gammaproteobacteria'	'Moraxellales'	'Moraxellaceae'	'Acinetobacter'	'Acinetobacter baumannii'
'GCF_012272795.1'	'Pseudomonadota'	'Gammaproteobacteria'	'Moraxellales'	'Moraxellaceae'	'Acinetobacter'	'Acinetobacter baumannii'
'GCF_012272795.1'	'Pseudomonadota'	'Gammaproteobacteria'	'Moraxellales'	'Moraxellaceae'	'Acinetobacter'	'Acinetobacter baumannii'
'GCF_012272795.1'	'Pseudomonadota'	'Gammaproteobacteria'	'Moraxellales'	'Moraxellaceae'	'Acinetobacter'	'Acinetobacter baumannii'
'GCF_005671375.1'	'Pseudomonadota'	'Gammaproteobacteria'	'Moraxellales'	'Moraxellaceae'	'Acinetobacter'	'Acinetobacter baumannii'
'GCF_005671375.1'	'Pseudomonadota'	'Gammaproteobacteria'	'Moraxellales'	'Moraxellaceae'	'Acinetobacter'	'Acinetobacter baumannii'
'GCF_005671375.1'	'Pseudomonadota'	'Gammaproteobacteria'	'Moraxellales'	'Moraxellaceae'	'Acinetobacter'	'Acinetobacter baumannii'
'GCF_001902375.1'	'Pseudomonadota'	'Gammaproteobacteria'	'Moraxellales'	'Moraxellaceae'	'Acinetobacter'	'Acinetobacter baumannii'
'GCF_001902375.1'	'Pseudomonadota'	'Gammaproteobacteria'	'Moraxellales'	'Moraxellaceae'	'Acinetobacter'	'Acinetobacter baumannii'
'GCF_001902375.1'	'Pseudomonadota'	'Gammaproteobacteria'	'Moraxellales'	'Moraxellaceae'	'Acinetobacter'	'Acinetobacter baumannii'
'GCF_009497995.1'	'Pseudomonadota'	'Gammaproteobacteria'	'Moraxellales'	'Moraxellaceae'	'Acinetobacter'	'Acinetobacter baumannii'
'GCF_009497995.1'	'Pseudomonadota'	'Gammaproteobacteria'	'Moraxellales'	'Moraxellaceae'	'Acinetobacter'	'Acinetobacter baumannii'
'GCF_009497995.1'	'Pseudomonadota'	'Gammaproteobacteria'	'Moraxellales'	'Moraxellaceae'	'Acinetobacter'	'Acinetobacter baumannii'
'GCF_001806405.1'	'Pseudomonadota'	'Gammaproteobacteria'	'Moraxellales'	'Moraxellaceae'	'Acinetobacter'	'Acinetobacter baumannii'
'GCF_001806405.1'	'Pseudomonadota'	'Gammaproteobacteria'	'Moraxellales'	'Moraxellaceae'	'Acinetobacter'	'Acinetobacter baumannii'
'GCF_001806405.1'	'Pseudomonadota'	'Gammaproteobacteria'	'Moraxellales'	'Moraxellaceae'	'Acinetobacter'	'Acinetobacter baumannii'
'GCF_001806365.1'	'Pseudomonadota'	'Gammaproteobacteria'	'Moraxellales'	'Moraxellaceae'	'Acinetobacter'	'Acinetobacter baumannii'
'GCF_001806365.1'	'Pseudomonadota'	'Gammaproteobacteria'	'Moraxellales'	'Moraxellaceae'	'Acinetobacter'	'Acinetobacter baumannii'
'GCF_001806365.1'	'Pseudomonadota'	'Gammaproteobacteria'	'Moraxellales'	'Moraxellaceae'	'Acinetobacter'	'Acinetobacter baumannii'
'GCF_001593425.2'	'Pseudomonadota'	'Gammaproteobacteria'	'Moraxellales'	'Moraxellaceae'	'Acinetobacter'	'Acinetobacter baumannii'
'GCF_001593425.2'	'Pseudomonadota'	'Gammaproteobacteria'	'Moraxellales'	'Moraxellaceae'	'Acinetobacter'	'Acinetobacter baumannii'
'GCF_001593425.2'	'Pseudomonadota'	'Gammaproteobacteria'	'Moraxellales'	'Moraxellaceae'	'Acinetobacter'	'Acinetobacter baumannii'
'GCF_001941765.1'	'Pseudomonadota'	'Gammaproteobacteria'	'Moraxellales'	'Moraxellaceae'	'Acinetobacter'	'Acinetobacter baumannii'
'GCF_001941765.1'	'Pseudomonadota'	'Gammaproteobacteria'	'Moraxellales'	'Moraxellaceae'	'Acinetobacter'	'Acinetobacter baumannii'
'GCF_001941765.1'	'Pseudomonadota'	'Gammaproteobacteria'	'Moraxellales'	'Moraxellaceae'	'Acinetobacter'	'Acinetobacter baumannii'
'GCF_000828935.1'	'Pseudomonadota'	'Gammaproteobacteria'	'Moraxellales'	'Moraxellaceae'	'Acinetobacter'	'Acinetobacter baumannii'
'GCF_000828935.1'	'Pseudomonadota'	'Gammaproteobacteria'	'Moraxellales'	'Moraxellaceae'	'Acinetobacter'	'Acinetobacter baumannii'
'GCF_000828935.1'	'Pseudomonadota'	'Gammaproteobacteria'	'Moraxellales'	'Moraxellaceae'	'Acinetobacter'	'Acinetobacter baumannii'
'GCF_002762115.1'	'Pseudomonadota'	'Gammaproteobacteria'	'Moraxellales'	'Moraxellaceae'	'Acinetobacter'	'Acinetobacter baumannii'
'GCF_002762115.1'	'Pseudomonadota'	'Gammaproteobacteria'	'Moraxellales'	'Moraxellaceae'	'Acinetobacter'	'Acinetobacter baumannii'
'GCF_002762115.1'	'Pseudomonadota'	'Gammaproteobacteria'	'Moraxellales'	'Moraxellaceae'	'Acinetobacter'	'Acinetobacter baumannii'
'GCF_002741415.1'	'Pseudomonadota'	'Gammaproteobacteria'	'Moraxellales'	'Moraxellaceae'	'Acinetobacter'	'Acinetobacter baumannii'
'GCF_002741415.1'	'Pseudomonadota'	'Gammaproteobacteria'	'Moraxellales'	'Moraxellaceae'	'Acinetobacter'	'Acinetobacter baumannii'
'GCF_012272715.1'	'Pseudomonadota'	'Gammaproteobacteria'	'Moraxellales'	'Moraxellaceae'	'Acinetobacter'	'Acinetobacter baumannii'
'GCF_012272715.1'	'Pseudomonadota'	'Gammaproteobacteria'	'Moraxellales'	'Moraxellaceae'	'Acinetobacter'	'Acinetobacter baumannii'
'GCF_012272715.1'	'Pseudomonadota'	'Gammaproteobacteria'	'Moraxellales'	'Moraxellaceae'	'Acinetobacter'	'Acinetobacter baumannii'
'GCF_001636235.1'	'Pseudomonadota'	'Gammaproteobacteria'	'Moraxellales'	'Moraxellaceae'	'Acinetobacter'	'Acinetobacter baumannii'
'GCF_001636235.1'	'Pseudomonadota'	'Gammaproteobacteria'	'Moraxellales'	'Moraxellaceae'	'Acinetobacter'	'Acinetobacter baumannii'
'GCF_001636235.1'	'Pseudomonadota'	'Gammaproteobacteria'	'Moraxellales'	'Moraxellaceae'	'Acinetobacter'	'Acinetobacter baumannii'
'GCF_002082645.1'	'Pseudomonadota'	'Gammaproteobacteria'	'Moraxellales'	'Moraxellaceae'	'Acinetobacter'	'Acinetobacter baumannii'
'GCF_002082645.1'	'Pseudomonadota'	'Gammaproteobacteria'	'Moraxellales'	'Moraxellaceae'	'Acinetobacter'	'Acinetobacter baumannii'
'GCF_002082645.1'	'Pseudomonadota'	'Gammaproteobacteria'	'Moraxellales'	'Moraxellaceae'	'Acinetobacter'	'Acinetobacter baumannii'
'GCF_002947415.1'	'Pseudomonadota'	'Gammaproteobacteria'	'Moraxellales'	'Moraxellaceae'	'Acinetobacter'	'Acinetobacter baumannii'
'GCF_003029495.1'	'Pseudomonadota'	'Gammaproteobacteria'	'Moraxellales'	'Moraxellaceae'	'Acinetobacter'	'Acinetobacter baumannii'
'GCF_001895125.2'	'Pseudomonadota'	'Gammaproteobacteria'	'Moraxellales'	'Moraxellaceae'	'Acinetobacter'	'Acinetobacter baumannii'
'GCF_001895125.2'	'Pseudomonadota'	'Gammaproteobacteria'	'Moraxellales'	'Moraxellaceae'	'Acinetobacter'	'Acinetobacter baumannii'
'GCF_001895125.2'	'Pseudomonadota'	'Gammaproteobacteria'	'Moraxellales'	'Moraxellaceae'	'Acinetobacter'	'Acinetobacter baumannii'
'GCF_002761575.1'	'Pseudomonadota'	'Gammaproteobacteria'	'Moraxellales'	'Moraxellaceae'	'Acinetobacter'	'Acinetobacter baumannii'
'GCF_002761575.1'	'Pseudomonadota'	'Gammaproteobacteria'	'Moraxellales'	'Moraxellaceae'	'Acinetobacter'	'Acinetobacter baumannii'
'GCF_002761575.1'	'Pseudomonadota'	'Gammaproteobacteria'	'Moraxellales'	'Moraxellaceae'	'Acinetobacter'	'Acinetobacter baumannii'
'GCF_000794125.2'	'Pseudomonadota'	'Gammaproteobacteria'	'Moraxellales'	'Moraxellaceae'	'Acinetobacter'	'Acinetobacter baumannii'
'GCF_000794125.2'	'Pseudomonadota'	'Gammaproteobacteria'	'Moraxellales'	'Moraxellaceae'	'Acinetobacter'	'Acinetobacter baumannii'
'GCF_000794125.2'	'Pseudomonadota'	'Gammaproteobacteria'	'Moraxellales'	'Moraxellaceae'	'Acinetobacter'	'Acinetobacter baumannii'
'GCF_002999195.2'	'Pseudomonadota'	'Gammaproteobacteria'	'Moraxellales'	'Moraxellaceae'	'Acinetobacter'	'Acinetobacter baumannii'
'GCF_002999195.2'	'Pseudomonadota'	'Gammaproteobacteria'	'Moraxellales'	'Moraxellaceae'	'Acinetobacter'	'Acinetobacter baumannii'
'GCF_002999195.2'	'Pseudomonadota'	'Gammaproteobacteria'	'Moraxellales'	'Moraxellaceae'	'Acinetobacter'	'Acinetobacter baumannii'
'GCF_001922245.1'	'Pseudomonadota'	'Gammaproteobacteria'	'Moraxellales'	'Moraxellaceae'	'Acinetobacter'	'Acinetobacter baumannii'
'GCF_001922245.1'	'Pseudomonadota'	'Gammaproteobacteria'	'Moraxellales'	'Moraxellaceae'	'Acinetobacter'	'Acinetobacter baumannii'
'GCF_001922245.1'	'Pseudomonadota'	'Gammaproteobacteria'	'Moraxellales'	'Moraxellaceae'	'Acinetobacter'	'Acinetobacter baumannii'
'GCF_003516005.1'	'Pseudomonadota'	'Gammaproteobacteria'	'Moraxellales'	'Moraxellaceae'	'Acinetobacter'	'Acinetobacter baumannii'
'GCF_003516005.1'	'Pseudomonadota'	'Gammaproteobacteria'	'Moraxellales'	'Moraxellaceae'	'Acinetobacter'	'Acinetobacter baumannii'
'GCF_003516005.1'	'Pseudomonadota'	'Gammaproteobacteria'	'Moraxellales'	'Moraxellaceae'	'Acinetobacter'	'Acinetobacter baumannii'
'GCF_002843665.1'	'Pseudomonadota'	'Gammaproteobacteria'	'Moraxellales'	'Moraxellaceae'	'Acinetobacter'	'Acinetobacter baumannii'
'GCF_002843665.1'	'Pseudomonadota'	'Gammaproteobacteria'	'Moraxellales'	'Moraxellaceae'	'Acinetobacter'	'Acinetobacter baumannii'
'GCF_002843665.1'	'Pseudomonadota'	'Gammaproteobacteria'	'Moraxellales'	'Moraxellaceae'	'Acinetobacter'	'Acinetobacter baumannii'
'GCF_001806385.1'	'Pseudomonadota'	'Gammaproteobacteria'	'Moraxellales'	'Moraxellaceae'	'Acinetobacter'	'Acinetobacter baumannii'
'GCF_001806385.1'	'Pseudomonadota'	'Gammaproteobacteria'	'Moraxellales'	'Moraxellaceae'	'Acinetobacter'	'Acinetobacter baumannii'
'GCF_001806385.1'	'Pseudomonadota'	'Gammaproteobacteria'	'Moraxellales'	'Moraxellaceae'	'Acinetobacter'	'Acinetobacter baumannii'
'GCF_002082865.1'	'Pseudomonadota'	'Gammaproteobacteria'	'Moraxellales'	'Moraxellaceae'	'Acinetobacter'	'Acinetobacter baumannii'
'GCF_002082865.1'	'Pseudomonadota'	'Gammaproteobacteria'	'Moraxellales'	'Moraxellaceae'	'Acinetobacter'	'Acinetobacter baumannii'
'GCF_002082865.1'	'Pseudomonadota'	'Gammaproteobacteria'	'Moraxellales'	'Moraxellaceae'	'Acinetobacter'	'Acinetobacter baumannii'
'GCF_001806465.1'	'Pseudomonadota'	'Gammaproteobacteria'	'Moraxellales'	'Moraxellaceae'	'Acinetobacter'	'Acinetobacter baumannii'
'GCF_001806465.1'	'Pseudomonadota'	'Gammaproteobacteria'	'Moraxellales'	'Moraxellaceae'	'Acinetobacter'	'Acinetobacter baumannii'
'GCF_001806465.1'	'Pseudomonadota'	'Gammaproteobacteria'	'Moraxellales'	'Moraxellaceae'	'Acinetobacter'	'Acinetobacter baumannii'
'GCF_001895985.1'	'Pseudomonadota'	'Gammaproteobacteria'	'Moraxellales'	'Moraxellaceae'	'Acinetobacter'	'Acinetobacter baumannii'
'GCF_001895985.1'	'Pseudomonadota'	'Gammaproteobacteria'	'Moraxellales'	'Moraxellaceae'	'Acinetobacter'	'Acinetobacter baumannii'
'GCF_001895985.1'	'Pseudomonadota'	'Gammaproteobacteria'	'Moraxellales'	'Moraxellaceae'	'Acinetobacter'	'Acinetobacter baumannii'
'GCF_002116925.1'	'Pseudomonadota'	'Gammaproteobacteria'	'Moraxellales'	'Moraxellaceae'	'Acinetobacter'	'Acinetobacter baumannii'
'GCF_002116925.1'	'Pseudomonadota'	'Gammaproteobacteria'	'Moraxellales'	'Moraxellaceae'	'Acinetobacter'	'Acinetobacter baumannii'
'GCF_002116925.1'	'Pseudomonadota'	'Gammaproteobacteria'	'Moraxellales'	'Moraxellaceae'	'Acinetobacter'	'Acinetobacter baumannii'
'GCF_003522885.1'	'Pseudomonadota'	'Gammaproteobacteria'	'Moraxellales'	'Moraxellaceae'	'Acinetobacter'	'Acinetobacter baumannii'
'GCF_003522885.1'	'Pseudomonadota'	'Gammaproteobacteria'	'Moraxellales'	'Moraxellaceae'	'Acinetobacter'	'Acinetobacter baumannii'
'GCF_003522885.1'	'Pseudomonadota'	'Gammaproteobacteria'	'Moraxellales'	'Moraxellaceae'	'Acinetobacter'	'Acinetobacter baumannii'
'GCF_005280695.1'	'Pseudomonadota'	'Gammaproteobacteria'	'Moraxellales'	'Moraxellaceae'	'Acinetobacter'	'Acinetobacter baumannii'
'GCF_005280695.1'	'Pseudomonadota'	'Gammaproteobacteria'	'Moraxellales'	'Moraxellaceae'	'Acinetobacter'	'Acinetobacter baumannii'
'GCF_005280695.1'	'Pseudomonadota'	'Gammaproteobacteria'	'Moraxellales'	'Moraxellaceae'	'Acinetobacter'	'Acinetobacter baumannii'
'GCF_001573085.1'	'Pseudomonadota'	'Gammaproteobacteria'	'Moraxellales'	'Moraxellaceae'	'Acinetobacter'	'Acinetobacter baumannii'
'GCF_001573085.1'	'Pseudomonadota'	'Gammaproteobacteria'	'Moraxellales'	'Moraxellaceae'	'Acinetobacter'	'Acinetobacter baumannii'
'GCF_001573085.1'	'Pseudomonadota'	'Gammaproteobacteria'	'Moraxellales'	'Moraxellaceae'	'Acinetobacter'	'Acinetobacter baumannii'
'GCF_003181015.1'	'Pseudomonadota'	'Gammaproteobacteria'	'Moraxellales'	'Moraxellaceae'	'Acinetobacter'	'Acinetobacter baumannii'
'GCF_003181015.1'	'Pseudomonadota'	'Gammaproteobacteria'	'Moraxellales'	'Moraxellaceae'	'Acinetobacter'	'Acinetobacter baumannii'
'GCF_003181015.1'	'Pseudomonadota'	'Gammaproteobacteria'	'Moraxellales'	'Moraxellaceae'	'Acinetobacter'	'Acinetobacter baumannii'
'GCF_003949595.2'	'Pseudomonadota'	'Gammaproteobacteria'	'Moraxellales'	'Moraxellaceae'	'Acinetobacter'	'Acinetobacter baumannii'
'GCF_003949595.2'	'Pseudomonadota'	'Gammaproteobacteria'	'Moraxellales'	'Moraxellaceae'	'Acinetobacter'	'Acinetobacter baumannii'
'GCF_003949595.2'	'Pseudomonadota'	'Gammaproteobacteria'	'Moraxellales'	'Moraxellaceae'	'Acinetobacter'	'Acinetobacter baumannii'
'GCF_002082625.2'	'Pseudomonadota'	'Gammaproteobacteria'	'Moraxellales'	'Moraxellaceae'	'Acinetobacter'	'Acinetobacter baumannii'
'GCF_002082625.2'	'Pseudomonadota'	'Gammaproteobacteria'	'Moraxellales'	'Moraxellaceae'	'Acinetobacter'	'Acinetobacter baumannii'
'GCF_002082625.2'	'Pseudomonadota'	'Gammaproteobacteria'	'Moraxellales'	'Moraxellaceae'	'Acinetobacter'	'Acinetobacter baumannii'
'GCF_001908295.1'	'Pseudomonadota'	'Gammaproteobacteria'	'Moraxellales'	'Moraxellaceae'	'Acinetobacter'	'Acinetobacter baumannii'
'GCF_001908295.1'	'Pseudomonadota'	'Gammaproteobacteria'	'Moraxellales'	'Moraxellaceae'	'Acinetobacter'	'Acinetobacter baumannii'
'GCF_001908295.1'	'Pseudomonadota'	'Gammaproteobacteria'	'Moraxellales'	'Moraxellaceae'	'Acinetobacter'	'Acinetobacter baumannii'
'GCF_001806485.1'	'Pseudomonadota'	'Gammaproteobacteria'	'Moraxellales'	'Moraxellaceae'	'Acinetobacter'	'Acinetobacter baumannii'
'GCF_001806485.1'	'Pseudomonadota'	'Gammaproteobacteria'	'Moraxellales'	'Moraxellaceae'	'Acinetobacter'	'Acinetobacter baumannii'
'GCF_001806485.1'	'Pseudomonadota'	'Gammaproteobacteria'	'Moraxellales'	'Moraxellaceae'	'Acinetobacter'	'Acinetobacter baumannii'
'GCF_000963815.1'	'Pseudomonadota'	'Gammaproteobacteria'	'Moraxellales'	'Moraxellaceae'	'Acinetobacter'	'Acinetobacter baumannii'
'GCF_000963815.1'	'Pseudomonadota'	'Gammaproteobacteria'	'Moraxellales'	'Moraxellaceae'	'Acinetobacter'	'Acinetobacter baumannii'
'GCF_000963815.1'	'Pseudomonadota'	'Gammaproteobacteria'	'Moraxellales'	'Moraxellaceae'	'Acinetobacter'	'Acinetobacter baumannii'
'GCF_002082845.1'	'Pseudomonadota'	'Gammaproteobacteria'	'Moraxellales'	'Moraxellaceae'	'Acinetobacter'	'Acinetobacter baumannii'
'GCF_002082845.1'	'Pseudomonadota'	'Gammaproteobacteria'	'Moraxellales'	'Moraxellaceae'	'Acinetobacter'	'Acinetobacter baumannii'
'GCF_002082845.1'	'Pseudomonadota'	'Gammaproteobacteria'	'Moraxellales'	'Moraxellaceae'	'Acinetobacter'	'Acinetobacter baumannii'
'GCF_003522845.1'	'Pseudomonadota'	'Gammaproteobacteria'	'Moraxellales'	'Moraxellaceae'	'Acinetobacter'	'Acinetobacter baumannii'
'GCF_003522845.1'	'Pseudomonadota'	'Gammaproteobacteria'	'Moraxellales'	'Moraxellaceae'	'Acinetobacter'	'Acinetobacter baumannii'
'GCF_003522845.1'	'Pseudomonadota'	'Gammaproteobacteria'	'Moraxellales'	'Moraxellaceae'	'Acinetobacter'	'Acinetobacter baumannii'
'GCF_000939415.2'	'Pseudomonadota'	'Gammaproteobacteria'	'Moraxellales'	'Moraxellaceae'	'Acinetobacter'	'Acinetobacter baumannii'
'GCF_000939415.2'	'Pseudomonadota'	'Gammaproteobacteria'	'Moraxellales'	'Moraxellaceae'	'Acinetobacter'	'Acinetobacter baumannii'
'GCF_000939415.2'	'Pseudomonadota'	'Gammaproteobacteria'	'Moraxellales'	'Moraxellaceae'	'Acinetobacter'	'Acinetobacter baumannii'
'GCF_001922205.1'	'Pseudomonadota'	'Gammaproteobacteria'	'Moraxellales'	'Moraxellaceae'	'Acinetobacter'	'Acinetobacter baumannii'
'GCF_001922205.1'	'Pseudomonadota'	'Gammaproteobacteria'	'Moraxellales'	'Moraxellaceae'	'Acinetobacter'	'Acinetobacter baumannii'
'GCF_001922205.1'	'Pseudomonadota'	'Gammaproteobacteria'	'Moraxellales'	'Moraxellaceae'	'Acinetobacter'	'Acinetobacter baumannii'
'GCF_001806445.1'	'Pseudomonadota'	'Gammaproteobacteria'	'Moraxellales'	'Moraxellaceae'	'Acinetobacter'	'Acinetobacter baumannii'
'GCF_001806445.1'	'Pseudomonadota'	'Gammaproteobacteria'	'Moraxellales'	'Moraxellaceae'	'Acinetobacter'	'Acinetobacter baumannii'
'GCF_001806445.1'	'Pseudomonadota'	'Gammaproteobacteria'	'Moraxellales'	'Moraxellaceae'	'Acinetobacter'	'Acinetobacter baumannii'
'GCF_001806425.1'	'Pseudomonadota'	'Gammaproteobacteria'	'Moraxellales'	'Moraxellaceae'	'Acinetobacter'	'Acinetobacter baumannii'
'GCF_001806425.1'	'Pseudomonadota'	'Gammaproteobacteria'	'Moraxellales'	'Moraxellaceae'	'Acinetobacter'	'Acinetobacter baumannii'
'GCF_001806425.1'	'Pseudomonadota'	'Gammaproteobacteria'	'Moraxellales'	'Moraxellaceae'	'Acinetobacter'	'Acinetobacter baumannii'
'GCF_002762095.1'	'Pseudomonadota'	'Gammaproteobacteria'	'Moraxellales'	'Moraxellaceae'	'Acinetobacter'	'Acinetobacter baumannii'
'GCF_002762095.1'	'Pseudomonadota'	'Gammaproteobacteria'	'Moraxellales'	'Moraxellaceae'	'Acinetobacter'	'Acinetobacter baumannii'
'GCF_002762095.1'	'Pseudomonadota'	'Gammaproteobacteria'	'Moraxellales'	'Moraxellaceae'	'Acinetobacter'	'Acinetobacter baumannii'
'GCF_002082705.1'	'Pseudomonadota'	'Gammaproteobacteria'	'Moraxellales'	'Moraxellaceae'	'Acinetobacter'	'Acinetobacter baumannii'
'GCF_002082705.1'	'Pseudomonadota'	'Gammaproteobacteria'	'Moraxellales'	'Moraxellaceae'	'Acinetobacter'	'Acinetobacter baumannii'
'GCF_002082705.1'	'Pseudomonadota'	'Gammaproteobacteria'	'Moraxellales'	'Moraxellaceae'	'Acinetobacter'	'Acinetobacter baumannii'
'GCF_001922225.1'	'Pseudomonadota'	'Gammaproteobacteria'	'Moraxellales'	'Moraxellaceae'	'Acinetobacter'	'Acinetobacter baumannii'
'GCF_001922225.1'	'Pseudomonadota'	'Gammaproteobacteria'	'Moraxellales'	'Moraxellaceae'	'Acinetobacter'	'Acinetobacter baumannii'
'GCF_001922225.1'	'Pseudomonadota'	'Gammaproteobacteria'	'Moraxellales'	'Moraxellaceae'	'Acinetobacter'	'Acinetobacter baumannii'
'GCF_008033255.2'	'Pseudomonadota'	'Gammaproteobacteria'	'Moraxellales'	'Moraxellaceae'	'Acinetobacter'	'Acinetobacter baumannii'
'GCF_008033255.2'	'Pseudomonadota'	'Gammaproteobacteria'	'Moraxellales'	'Moraxellaceae'	'Acinetobacter'	'Acinetobacter baumannii'
'GCF_001806345.1'	'Pseudomonadota'	'Gammaproteobacteria'	'Moraxellales'	'Moraxellaceae'	'Acinetobacter'	'Acinetobacter baumannii'
'GCF_001806345.1'	'Pseudomonadota'	'Gammaproteobacteria'	'Moraxellales'	'Moraxellaceae'	'Acinetobacter'	'Acinetobacter baumannii'
'GCF_001806345.1'	'Pseudomonadota'	'Gammaproteobacteria'	'Moraxellales'	'Moraxellaceae'	'Acinetobacter'	'Acinetobacter baumannii'
'GCF_003949725.2'	'Pseudomonadota'	'Gammaproteobacteria'	'Moraxellales'	'Moraxellaceae'	'Acinetobacter'	'Acinetobacter baumannii'
'GCF_003949725.2'	'Pseudomonadota'	'Gammaproteobacteria'	'Moraxellales'	'Moraxellaceae'	'Acinetobacter'	'Acinetobacter baumannii'
'GCF_003949725.2'	'Pseudomonadota'	'Gammaproteobacteria'	'Moraxellales'	'Moraxellaceae'	'Acinetobacter'	'Acinetobacter baumannii'
'GCF_008630895.1'	'Pseudomonadota'	'Gammaproteobacteria'	'Moraxellales'	'Moraxellaceae'	'Acinetobacter'	'Acinetobacter baumannii'
'GCF_008630895.1'	'Pseudomonadota'	'Gammaproteobacteria'	'Moraxellales'	'Moraxellaceae'	'Acinetobacter'	'Acinetobacter baumannii'
'GCF_008630895.1'	'Pseudomonadota'	'Gammaproteobacteria'	'Moraxellales'	'Moraxellaceae'	'Acinetobacter'	'Acinetobacter baumannii'
'GCF_012272775.1'	'Pseudomonadota'	'Gammaproteobacteria'	'Moraxellales'	'Moraxellaceae'	'Acinetobacter'	'Acinetobacter baumannii'
'GCF_012272775.1'	'Pseudomonadota'	'Gammaproteobacteria'	'Moraxellales'	'Moraxellaceae'	'Acinetobacter'	'Acinetobacter baumannii'
'GCF_012272775.1'	'Pseudomonadota'	'Gammaproteobacteria'	'Moraxellales'	'Moraxellaceae'	'Acinetobacter'	'Acinetobacter baumannii'
'GCF_008807055.1'	'Pseudomonadota'	'Gammaproteobacteria'	'Moraxellales'	'Moraxellaceae'	'Acinetobacter'	'Acinetobacter baumannii'
'GCF_008807055.1'	'Pseudomonadota'	'Gammaproteobacteria'	'Moraxellales'	'Moraxellaceae'	'Acinetobacter'	'Acinetobacter baumannii'
'GCF_008807055.1'	'Pseudomonadota'	'Gammaproteobacteria'	'Moraxellales'	'Moraxellaceae'	'Acinetobacter'	'Acinetobacter baumannii'
'GCF_001077555.2'	'Pseudomonadota'	'Gammaproteobacteria'	'Moraxellales'	'Moraxellaceae'	'Acinetobacter'	'Acinetobacter baumannii'
'GCF_001077555.2'	'Pseudomonadota'	'Gammaproteobacteria'	'Moraxellales'	'Moraxellaceae'	'Acinetobacter'	'Acinetobacter baumannii'
'GCF_001077555.2'	'Pseudomonadota'	'Gammaproteobacteria'	'Moraxellales'	'Moraxellaceae'	'Acinetobacter'	'Acinetobacter baumannii'
'GCF_003296225.1'	'Pseudomonadota'	'Gammaproteobacteria'	'Moraxellales'	'Moraxellaceae'	'Acinetobacter'	'Acinetobacter baumannii'
'GCF_003296225.1'	'Pseudomonadota'	'Gammaproteobacteria'	'Moraxellales'	'Moraxellaceae'	'Acinetobacter'	'Acinetobacter baumannii'
'GCF_003296225.1'	'Pseudomonadota'	'Gammaproteobacteria'	'Moraxellales'	'Moraxellaceae'	'Acinetobacter'	'Acinetobacter baumannii'
'GCF_004101745.1'	'Pseudomonadota'	'Gammaproteobacteria'	'Moraxellales'	'Moraxellaceae'	'Acinetobacter'	'Acinetobacter baumannii'
'GCF_004101745.1'	'Pseudomonadota'	'Gammaproteobacteria'	'Moraxellales'	'Moraxellaceae'	'Acinetobacter'	'Acinetobacter baumannii'
'GCF_004101745.1'	'Pseudomonadota'	'Gammaproteobacteria'	'Moraxellales'	'Moraxellaceae'	'Acinetobacter'	'Acinetobacter baumannii'
'GCF_003010655.1'	'Pseudomonadota'	'Gammaproteobacteria'	'Moraxellales'	'Moraxellaceae'	'Acinetobacter'	'Acinetobacter baumannii'
'GCF_003010655.1'	'Pseudomonadota'	'Gammaproteobacteria'	'Moraxellales'	'Moraxellaceae'	'Acinetobacter'	'Acinetobacter baumannii'
'GCF_003010655.1'	'Pseudomonadota'	'Gammaproteobacteria'	'Moraxellales'	'Moraxellaceae'	'Acinetobacter'	'Acinetobacter baumannii'
'GCF_003931755.1'	'Pseudomonadota'	'Gammaproteobacteria'	'Moraxellales'	'Moraxellaceae'	'Acinetobacter'	'Acinetobacter baumannii'
'GCF_003931755.1'	'Pseudomonadota'	'Gammaproteobacteria'	'Moraxellales'	'Moraxellaceae'	'Acinetobacter'	'Acinetobacter baumannii'
'GCF_003931755.1'	'Pseudomonadota'	'Gammaproteobacteria'	'Moraxellales'	'Moraxellaceae'	'Acinetobacter'	'Acinetobacter baumannii'
'GCF_003931775.1'	'Pseudomonadota'	'Gammaproteobacteria'	'Moraxellales'	'Moraxellaceae'	'Acinetobacter'	'Acinetobacter baumannii'
'GCF_003931775.1'	'Pseudomonadota'	'Gammaproteobacteria'	'Moraxellales'	'Moraxellaceae'	'Acinetobacter'	'Acinetobacter baumannii'
'GCF_003931775.1'	'Pseudomonadota'	'Gammaproteobacteria'	'Moraxellales'	'Moraxellaceae'	'Acinetobacter'	'Acinetobacter baumannii'
'GCF_004101705.1'	'Pseudomonadota'	'Gammaproteobacteria'	'Moraxellales'	'Moraxellaceae'	'Acinetobacter'	'Acinetobacter baumannii'
'GCF_004101705.1'	'Pseudomonadota'	'Gammaproteobacteria'	'Moraxellales'	'Moraxellaceae'	'Acinetobacter'	'Acinetobacter baumannii'
'GCF_004101705.1'	'Pseudomonadota'	'Gammaproteobacteria'	'Moraxellales'	'Moraxellaceae'	'Acinetobacter'	'Acinetobacter baumannii'
'GCF_001517645.1'	'Pseudomonadota'	'Gammaproteobacteria'	'Moraxellales'	'Moraxellaceae'	'Acinetobacter'	'Acinetobacter baumannii'
'GCF_001517645.1'	'Pseudomonadota'	'Gammaproteobacteria'	'Moraxellales'	'Moraxellaceae'	'Acinetobacter'	'Acinetobacter baumannii'
'GCF_001517645.1'	'Pseudomonadota'	'Gammaproteobacteria'	'Moraxellales'	'Moraxellaceae'	'Acinetobacter'	'Acinetobacter baumannii'
'GCF_004101685.1'	'Pseudomonadota'	'Gammaproteobacteria'	'Moraxellales'	'Moraxellaceae'	'Acinetobacter'	'Acinetobacter baumannii'
'GCF_004101685.1'	'Pseudomonadota'	'Gammaproteobacteria'	'Moraxellales'	'Moraxellaceae'	'Acinetobacter'	'Acinetobacter baumannii'
'GCF_004101685.1'	'Pseudomonadota'	'Gammaproteobacteria'	'Moraxellales'	'Moraxellaceae'	'Acinetobacter'	'Acinetobacter baumannii'
'GCF_008244885.1'	'Pseudomonadota'	'Gammaproteobacteria'	'Moraxellales'	'Moraxellaceae'	'Acinetobacter'	'Acinetobacter baumannii'
'GCF_008244885.1'	'Pseudomonadota'	'Gammaproteobacteria'	'Moraxellales'	'Moraxellaceae'	'Acinetobacter'	'Acinetobacter baumannii'
'GCF_008244885.1'	'Pseudomonadota'	'Gammaproteobacteria'	'Moraxellales'	'Moraxellaceae'	'Acinetobacter'	'Acinetobacter baumannii'
'GCF_001077655.1'	'Pseudomonadota'	'Gammaproteobacteria'	'Moraxellales'	'Moraxellaceae'	'Acinetobacter'	'Acinetobacter baumannii'
'GCF_001077655.1'	'Pseudomonadota'	'Gammaproteobacteria'	'Moraxellales'	'Moraxellaceae'	'Acinetobacter'	'Acinetobacter baumannii'
'GCF_001077655.1'	'Pseudomonadota'	'Gammaproteobacteria'	'Moraxellales'	'Moraxellaceae'	'Acinetobacter'	'Acinetobacter baumannii'
'GCF_004136355.1'	'Pseudomonadota'	'Gammaproteobacteria'	'Moraxellales'	'Moraxellaceae'	'Acinetobacter'	'Acinetobacter baumannii'
'GCF_004136355.1'	'Pseudomonadota'	'Gammaproteobacteria'	'Moraxellales'	'Moraxellaceae'	'Acinetobacter'	'Acinetobacter baumannii'
'GCF_008244865.1'	'Pseudomonadota'	'Gammaproteobacteria'	'Moraxellales'	'Moraxellaceae'	'Acinetobacter'	'Acinetobacter baumannii'
'GCF_008244865.1'	'Pseudomonadota'	'Gammaproteobacteria'	'Moraxellales'	'Moraxellaceae'	'Acinetobacter'	'Acinetobacter baumannii'
'GCF_008244865.1'	'Pseudomonadota'	'Gammaproteobacteria'	'Moraxellales'	'Moraxellaceae'	'Acinetobacter'	'Acinetobacter baumannii'
'GCF_008244905.1'	'Pseudomonadota'	'Gammaproteobacteria'	'Moraxellales'	'Moraxellaceae'	'Acinetobacter'	'Acinetobacter baumannii'
'GCF_008244905.1'	'Pseudomonadota'	'Gammaproteobacteria'	'Moraxellales'	'Moraxellaceae'	'Acinetobacter'	'Acinetobacter baumannii'
'GCF_008244905.1'	'Pseudomonadota'	'Gammaproteobacteria'	'Moraxellales'	'Moraxellaceae'	'Acinetobacter'	'Acinetobacter baumannii'
'GCF_004101725.1'	'Pseudomonadota'	'Gammaproteobacteria'	'Moraxellales'	'Moraxellaceae'	'Acinetobacter'	'Acinetobacter baumannii'
'GCF_004101725.1'	'Pseudomonadota'	'Gammaproteobacteria'	'Moraxellales'	'Moraxellaceae'	'Acinetobacter'	'Acinetobacter baumannii'
'GCF_004101725.1'	'Pseudomonadota'	'Gammaproteobacteria'	'Moraxellales'	'Moraxellaceae'	'Acinetobacter'	'Acinetobacter baumannii'
'GCF_002082885.1'	'Pseudomonadota'	'Gammaproteobacteria'	'Moraxellales'	'Moraxellaceae'	'Acinetobacter'	'Acinetobacter baumannii'
'GCF_002082885.1'	'Pseudomonadota'	'Gammaproteobacteria'	'Moraxellales'	'Moraxellaceae'	'Acinetobacter'	'Acinetobacter baumannii'
'GCF_002082885.1'	'Pseudomonadota'	'Gammaproteobacteria'	'Moraxellales'	'Moraxellaceae'	'Acinetobacter'	'Acinetobacter baumannii'
'GCF_001674505.2'	'Pseudomonadota'	'Gammaproteobacteria'	'Moraxellales'	'Moraxellaceae'	'Acinetobacter'	'Acinetobacter baumannii'
'GCF_001674505.2'	'Pseudomonadota'	'Gammaproteobacteria'	'Moraxellales'	'Moraxellaceae'	'Acinetobacter'	'Acinetobacter baumannii'
'GCF_002082825.1'	'Pseudomonadota'	'Gammaproteobacteria'	'Moraxellales'	'Moraxellaceae'	'Acinetobacter'	'Acinetobacter baumannii'
'GCF_002082825.1'	'Pseudomonadota'	'Gammaproteobacteria'	'Moraxellales'	'Moraxellaceae'	'Acinetobacter'	'Acinetobacter baumannii'
'GCF_002082825.1'	'Pseudomonadota'	'Gammaproteobacteria'	'Moraxellales'	'Moraxellaceae'	'Acinetobacter'	'Acinetobacter baumannii'
'GCF_001674475.2'	'Pseudomonadota'	'Gammaproteobacteria'	'Moraxellales'	'Moraxellaceae'	'Acinetobacter'	'Acinetobacter baumannii'
'GCF_001674475.2'	'Pseudomonadota'	'Gammaproteobacteria'	'Moraxellales'	'Moraxellaceae'	'Acinetobacter'	'Acinetobacter baumannii'
'GCF_001457535.1'	'Pseudomonadota'	'Gammaproteobacteria'	'Moraxellales'	'Moraxellaceae'	'Acinetobacter'	'Acinetobacter baumannii'
'GCF_001457535.1'	'Pseudomonadota'	'Gammaproteobacteria'	'Moraxellales'	'Moraxellaceae'	'Acinetobacter'	'Acinetobacter baumannii'
'GCF_001457535.1'	'Pseudomonadota'	'Gammaproteobacteria'	'Moraxellales'	'Moraxellaceae'	'Acinetobacter'	'Acinetobacter baumannii'
'GCF_007647215.1'	'Pseudomonadota'	'Gammaproteobacteria'	'Moraxellales'	'Moraxellaceae'	'Acinetobacter'	'Acinetobacter baumannii'
'GCF_007647215.1'	'Pseudomonadota'	'Gammaproteobacteria'	'Moraxellales'	'Moraxellaceae'	'Acinetobacter'	'Acinetobacter baumannii'
'GCF_007647215.1'	'Pseudomonadota'	'Gammaproteobacteria'	'Moraxellales'	'Moraxellaceae'	'Acinetobacter'	'Acinetobacter baumannii'
'GCF_001669145.2'	'Pseudomonadota'	'Gammaproteobacteria'	'Moraxellales'	'Moraxellaceae'	'Acinetobacter'	'Acinetobacter baumannii'
'GCF_001669145.2'	'Pseudomonadota'	'Gammaproteobacteria'	'Moraxellales'	'Moraxellaceae'	'Acinetobacter'	'Acinetobacter baumannii'
'GCF_003948535.2'	'Pseudomonadota'	'Gammaproteobacteria'	'Moraxellales'	'Moraxellaceae'	'Acinetobacter'	'Acinetobacter baumannii'
'GCF_003948535.2'	'Pseudomonadota'	'Gammaproteobacteria'	'Moraxellales'	'Moraxellaceae'	'Acinetobacter'	'Acinetobacter baumannii'
'GCF_003948535.2'	'Pseudomonadota'	'Gammaproteobacteria'	'Moraxellales'	'Moraxellaceae'	'Acinetobacter'	'Acinetobacter baumannii'
'GCF_003264255.1'	'Pseudomonadota'	'Gammaproteobacteria'	'Moraxellales'	'Moraxellaceae'	'Acinetobacter'	'Acinetobacter baumannii'
'GCF_003264255.1'	'Pseudomonadota'	'Gammaproteobacteria'	'Moraxellales'	'Moraxellaceae'	'Acinetobacter'	'Acinetobacter baumannii'
'GCF_003264255.1'	'Pseudomonadota'	'Gammaproteobacteria'	'Moraxellales'	'Moraxellaceae'	'Acinetobacter'	'Acinetobacter baumannii'
'GCF_002762155.1'	'Pseudomonadota'	'Gammaproteobacteria'	'Moraxellales'	'Moraxellaceae'	'Acinetobacter'	'Acinetobacter baumannii'
'GCF_002762155.1'	'Pseudomonadota'	'Gammaproteobacteria'	'Moraxellales'	'Moraxellaceae'	'Acinetobacter'	'Acinetobacter baumannii'
'GCF_002762155.1'	'Pseudomonadota'	'Gammaproteobacteria'	'Moraxellales'	'Moraxellaceae'	'Acinetobacter'	'Acinetobacter baumannii'
'GCF_002082725.1'	'Pseudomonadota'	'Gammaproteobacteria'	'Moraxellales'	'Moraxellaceae'	'Acinetobacter'	'Acinetobacter baumannii'
'GCF_002082725.1'	'Pseudomonadota'	'Gammaproteobacteria'	'Moraxellales'	'Moraxellaceae'	'Acinetobacter'	'Acinetobacter baumannii'
'GCF_002082725.1'	'Pseudomonadota'	'Gammaproteobacteria'	'Moraxellales'	'Moraxellaceae'	'Acinetobacter'	'Acinetobacter baumannii'
'GCF_003288775.1'	'Pseudomonadota'	'Gammaproteobacteria'	'Moraxellales'	'Moraxellaceae'	'Acinetobacter'	'Acinetobacter baumannii'
'GCF_003288775.1'	'Pseudomonadota'	'Gammaproteobacteria'	'Moraxellales'	'Moraxellaceae'	'Acinetobacter'	'Acinetobacter baumannii'
'GCF_003288775.1'	'Pseudomonadota'	'Gammaproteobacteria'	'Moraxellales'	'Moraxellaceae'	'Acinetobacter'	'Acinetobacter baumannii'
'GCF_003264295.1'	'Pseudomonadota'	'Gammaproteobacteria'	'Moraxellales'	'Moraxellaceae'	'Acinetobacter'	'Acinetobacter baumannii'
'GCF_003264295.1'	'Pseudomonadota'	'Gammaproteobacteria'	'Moraxellales'	'Moraxellaceae'	'Acinetobacter'	'Acinetobacter baumannii'
'GCF_003264295.1'	'Pseudomonadota'	'Gammaproteobacteria'	'Moraxellales'	'Moraxellaceae'	'Acinetobacter'	'Acinetobacter baumannii'
'GCF_000830055.1'	'Pseudomonadota'	'Gammaproteobacteria'	'Moraxellales'	'Moraxellaceae'	'Acinetobacter'	'Acinetobacter baumannii'
'GCF_000830055.1'	'Pseudomonadota'	'Gammaproteobacteria'	'Moraxellales'	'Moraxellaceae'	'Acinetobacter'	'Acinetobacter baumannii'
'GCF_000830055.1'	'Pseudomonadota'	'Gammaproteobacteria'	'Moraxellales'	'Moraxellaceae'	'Acinetobacter'	'Acinetobacter baumannii'
'GCF_001573125.1'	'Pseudomonadota'	'Gammaproteobacteria'	'Moraxellales'	'Moraxellaceae'	'Acinetobacter'	'Acinetobacter baumannii'
'GCF_001573125.1'	'Pseudomonadota'	'Gammaproteobacteria'	'Moraxellales'	'Moraxellaceae'	'Acinetobacter'	'Acinetobacter baumannii'
'GCF_001573125.1'	'Pseudomonadota'	'Gammaproteobacteria'	'Moraxellales'	'Moraxellaceae'	'Acinetobacter'	'Acinetobacter baumannii'
'GCF_000814345.1'	'Pseudomonadota'	'Gammaproteobacteria'	'Moraxellales'	'Moraxellaceae'	'Acinetobacter'	'Acinetobacter baumannii'
'GCF_000814345.1'	'Pseudomonadota'	'Gammaproteobacteria'	'Moraxellales'	'Moraxellaceae'	'Acinetobacter'	'Acinetobacter baumannii'
'GCF_000814345.1'	'Pseudomonadota'	'Gammaproteobacteria'	'Moraxellales'	'Moraxellaceae'	'Acinetobacter'	'Acinetobacter baumannii'
'GCF_007221455.1'	'Pseudomonadota'	'Gammaproteobacteria'	'Moraxellales'	'Moraxellaceae'	'Acinetobacter'	'Acinetobacter baumannii'
'GCF_007221455.1'	'Pseudomonadota'	'Gammaproteobacteria'	'Moraxellales'	'Moraxellaceae'	'Acinetobacter'	'Acinetobacter baumannii'
'GCF_007221455.1'	'Pseudomonadota'	'Gammaproteobacteria'	'Moraxellales'	'Moraxellaceae'	'Acinetobacter'	'Acinetobacter baumannii'
'GCF_002950495.2'	'Pseudomonadota'	'Gammaproteobacteria'	'Moraxellales'	'Moraxellaceae'	'Acinetobacter'	'Acinetobacter baumannii'
'GCF_002950495.2'	'Pseudomonadota'	'Gammaproteobacteria'	'Moraxellales'	'Moraxellaceae'	'Acinetobacter'	'Acinetobacter baumannii'
'GCF_002950495.2'	'Pseudomonadota'	'Gammaproteobacteria'	'Moraxellales'	'Moraxellaceae'	'Acinetobacter'	'Acinetobacter baumannii'
'GCF_003591615.1'	'Pseudomonadota'	'Gammaproteobacteria'	'Moraxellales'	'Moraxellaceae'	'Acinetobacter'	'Acinetobacter baumannii'
'GCF_003591615.1'	'Pseudomonadota'	'Gammaproteobacteria'	'Moraxellales'	'Moraxellaceae'	'Acinetobacter'	'Acinetobacter baumannii'
'GCF_003591615.1'	'Pseudomonadota'	'Gammaproteobacteria'	'Moraxellales'	'Moraxellaceae'	'Acinetobacter'	'Acinetobacter baumannii'
'GCF_003948455.2'	'Pseudomonadota'	'Gammaproteobacteria'	'Moraxellales'	'Moraxellaceae'	'Acinetobacter'	'Acinetobacter baumannii'
'GCF_003948455.2'	'Pseudomonadota'	'Gammaproteobacteria'	'Moraxellales'	'Moraxellaceae'	'Acinetobacter'	'Acinetobacter baumannii'
'GCF_003948455.2'	'Pseudomonadota'	'Gammaproteobacteria'	'Moraxellales'	'Moraxellaceae'	'Acinetobacter'	'Acinetobacter baumannii'
'GCF_002082745.1'	'Pseudomonadota'	'Gammaproteobacteria'	'Moraxellales'	'Moraxellaceae'	'Acinetobacter'	'Acinetobacter baumannii'
'GCF_002082745.1'	'Pseudomonadota'	'Gammaproteobacteria'	'Moraxellales'	'Moraxellaceae'	'Acinetobacter'	'Acinetobacter baumannii'
'GCF_002082745.1'	'Pseudomonadota'	'Gammaproteobacteria'	'Moraxellales'	'Moraxellaceae'	'Acinetobacter'	'Acinetobacter baumannii'
'GCF_001573105.1'	'Pseudomonadota'	'Gammaproteobacteria'	'Moraxellales'	'Moraxellaceae'	'Acinetobacter'	'Acinetobacter baumannii'
'GCF_001573105.1'	'Pseudomonadota'	'Gammaproteobacteria'	'Moraxellales'	'Moraxellaceae'	'Acinetobacter'	'Acinetobacter baumannii'
'GCF_001573105.1'	'Pseudomonadota'	'Gammaproteobacteria'	'Moraxellales'	'Moraxellaceae'	'Acinetobacter'	'Acinetobacter baumannii'
'GCF_000761175.1'	'Pseudomonadota'	'Gammaproteobacteria'	'Moraxellales'	'Moraxellaceae'	'Acinetobacter'	'Acinetobacter baumannii'
'GCF_000761175.1'	'Pseudomonadota'	'Gammaproteobacteria'	'Moraxellales'	'Moraxellaceae'	'Acinetobacter'	'Acinetobacter baumannii'
'GCF_001668465.2'	'Pseudomonadota'	'Gammaproteobacteria'	'Moraxellales'	'Moraxellaceae'	'Acinetobacter'	'Acinetobacter baumannii'
'GCF_001668465.2'	'Pseudomonadota'	'Gammaproteobacteria'	'Moraxellales'	'Moraxellaceae'	'Acinetobacter'	'Acinetobacter baumannii'
'GCF_002948925.1'	'Pseudomonadota'	'Gammaproteobacteria'	'Moraxellales'	'Moraxellaceae'	'Acinetobacter'	'Acinetobacter baumannii'
'GCF_002948925.1'	'Pseudomonadota'	'Gammaproteobacteria'	'Moraxellales'	'Moraxellaceae'	'Acinetobacter'	'Acinetobacter baumannii'
'GCF_002948925.1'	'Pseudomonadota'	'Gammaproteobacteria'	'Moraxellales'	'Moraxellaceae'	'Acinetobacter'	'Acinetobacter baumannii'
'GCF_002082805.1'	'Pseudomonadota'	'Gammaproteobacteria'	'Moraxellales'	'Moraxellaceae'	'Acinetobacter'	'Acinetobacter baumannii'
'GCF_002082805.1'	'Pseudomonadota'	'Gammaproteobacteria'	'Moraxellales'	'Moraxellaceae'	'Acinetobacter'	'Acinetobacter baumannii'
'GCF_002082805.1'	'Pseudomonadota'	'Gammaproteobacteria'	'Moraxellales'	'Moraxellaceae'	'Acinetobacter'	'Acinetobacter baumannii'
'GCF_002082685.1'	'Pseudomonadota'	'Gammaproteobacteria'	'Moraxellales'	'Moraxellaceae'	'Acinetobacter'	'Acinetobacter baumannii'
'GCF_002082685.1'	'Pseudomonadota'	'Gammaproteobacteria'	'Moraxellales'	'Moraxellaceae'	'Acinetobacter'	'Acinetobacter baumannii'
'GCF_004028375.1'	'Pseudomonadota'	'Gammaproteobacteria'	'Moraxellales'	'Moraxellaceae'	'Acinetobacter'	'Acinetobacter baumannii'
'GCF_004028375.1'	'Pseudomonadota'	'Gammaproteobacteria'	'Moraxellales'	'Moraxellaceae'	'Acinetobacter'	'Acinetobacter baumannii'
'GCF_004028375.1'	'Pseudomonadota'	'Gammaproteobacteria'	'Moraxellales'	'Moraxellaceae'	'Acinetobacter'	'Acinetobacter baumannii'
'GCF_001077675.1'	'Pseudomonadota'	'Gammaproteobacteria'	'Moraxellales'	'Moraxellaceae'	'Acinetobacter'	'Acinetobacter baumannii'
'GCF_001077675.1'	'Pseudomonadota'	'Gammaproteobacteria'	'Moraxellales'	'Moraxellaceae'	'Acinetobacter'	'Acinetobacter baumannii'
'GCF_001077675.1'	'Pseudomonadota'	'Gammaproteobacteria'	'Moraxellales'	'Moraxellaceae'	'Acinetobacter'	'Acinetobacter baumannii'
'GCF_011067065.1'	'Pseudomonadota'	'Gammaproteobacteria'	'Moraxellales'	'Moraxellaceae'	'Acinetobacter'	'Acinetobacter baumannii'
'GCF_011067065.1'	'Pseudomonadota'	'Gammaproteobacteria'	'Moraxellales'	'Moraxellaceae'	'Acinetobacter'	'Acinetobacter baumannii'
'GCF_011067065.1'	'Pseudomonadota'	'Gammaproteobacteria'	'Moraxellales'	'Moraxellaceae'	'Acinetobacter'	'Acinetobacter baumannii'
'GCF_000695855.3'	'Pseudomonadota'	'Gammaproteobacteria'	'Moraxellales'	'Moraxellaceae'	'Acinetobacter'	'Acinetobacter baumannii'
'GCF_000695855.3'	'Pseudomonadota'	'Gammaproteobacteria'	'Moraxellales'	'Moraxellaceae'	'Acinetobacter'	'Acinetobacter baumannii'
'GCF_000695855.3'	'Pseudomonadota'	'Gammaproteobacteria'	'Moraxellales'	'Moraxellaceae'	'Acinetobacter'	'Acinetobacter baumannii'
'GCF_001573065.1'	'Pseudomonadota'	'Gammaproteobacteria'	'Moraxellales'	'Moraxellaceae'	'Acinetobacter'	'Acinetobacter baumannii'
'GCF_001573065.1'	'Pseudomonadota'	'Gammaproteobacteria'	'Moraxellales'	'Moraxellaceae'	'Acinetobacter'	'Acinetobacter baumannii'
'GCF_001573065.1'	'Pseudomonadota'	'Gammaproteobacteria'	'Moraxellales'	'Moraxellaceae'	'Acinetobacter'	'Acinetobacter baumannii'
'GCF_008124045.1'	'Pseudomonadota'	'Gammaproteobacteria'	'Moraxellales'	'Moraxellaceae'	'Acinetobacter'	'Acinetobacter baumannii'
'GCF_008124045.1'	'Pseudomonadota'	'Gammaproteobacteria'	'Moraxellales'	'Moraxellaceae'	'Acinetobacter'	'Acinetobacter baumannii'
'GCF_008124045.1'	'Pseudomonadota'	'Gammaproteobacteria'	'Moraxellales'	'Moraxellaceae'	'Acinetobacter'	'Acinetobacter baumannii'
'GCF_004768705.1'	'Pseudomonadota'	'Gammaproteobacteria'	'Moraxellales'	'Moraxellaceae'	'Acinetobacter'	'Acinetobacter baumannii'
'GCF_004768705.1'	'Pseudomonadota'	'Gammaproteobacteria'	'Moraxellales'	'Moraxellaceae'	'Acinetobacter'	'Acinetobacter baumannii'
'GCF_004768705.1'	'Pseudomonadota'	'Gammaproteobacteria'	'Moraxellales'	'Moraxellaceae'	'Acinetobacter'	'Acinetobacter baumannii'
'GCF_001077965.2'	'Pseudomonadota'	'Gammaproteobacteria'	'Moraxellales'	'Moraxellaceae'	'Acinetobacter'	'Acinetobacter baumannii'
'GCF_001077965.2'	'Pseudomonadota'	'Gammaproteobacteria'	'Moraxellales'	'Moraxellaceae'	'Acinetobacter'	'Acinetobacter baumannii'
'GCF_001261895.2'	'Pseudomonadota'	'Gammaproteobacteria'	'Moraxellales'	'Moraxellaceae'	'Acinetobacter'	'Acinetobacter baumannii'
'GCF_001261895.2'	'Pseudomonadota'	'Gammaproteobacteria'	'Moraxellales'	'Moraxellaceae'	'Acinetobacter'	'Acinetobacter baumannii'
'GCF_001261895.2'	'Pseudomonadota'	'Gammaproteobacteria'	'Moraxellales'	'Moraxellaceae'	'Acinetobacter'	'Acinetobacter baumannii'
'GCF_008802935.1'	'Pseudomonadota'	'Gammaproteobacteria'	'Moraxellales'	'Moraxellaceae'	'Acinetobacter'	'Acinetobacter baumannii'
'GCF_008802935.1'	'Pseudomonadota'	'Gammaproteobacteria'	'Moraxellales'	'Moraxellaceae'	'Acinetobacter'	'Acinetobacter baumannii'
'GCF_008802935.1'	'Pseudomonadota'	'Gammaproteobacteria'	'Moraxellales'	'Moraxellaceae'	'Acinetobacter'	'Acinetobacter baumannii'
'GCF_009833005.1'	'Pseudomonadota'	'Gammaproteobacteria'	'Moraxellales'	'Moraxellaceae'	'Acinetobacter'	'Acinetobacter baumannii'
'GCF_009833005.1'	'Pseudomonadota'	'Gammaproteobacteria'	'Moraxellales'	'Moraxellaceae'	'Acinetobacter'	'Acinetobacter baumannii'
'GCF_009833005.1'	'Pseudomonadota'	'Gammaproteobacteria'	'Moraxellales'	'Moraxellaceae'	'Acinetobacter'	'Acinetobacter baumannii'
'GCF_009740145.1'	'Pseudomonadota'	'Gammaproteobacteria'	'Moraxellales'	'Moraxellaceae'	'Acinetobacter'	'Acinetobacter baumannii'
'GCF_009740145.1'	'Pseudomonadota'	'Gammaproteobacteria'	'Moraxellales'	'Moraxellaceae'	'Acinetobacter'	'Acinetobacter baumannii'
'GCF_009740145.1'	'Pseudomonadota'	'Gammaproteobacteria'	'Moraxellales'	'Moraxellaceae'	'Acinetobacter'	'Acinetobacter baumannii'
'GCF_008931365.1'	'Pseudomonadota'	'Gammaproteobacteria'	'Moraxellales'	'Moraxellaceae'	'Acinetobacter'	'Acinetobacter baumannii'
'GCF_008931365.1'	'Pseudomonadota'	'Gammaproteobacteria'	'Moraxellales'	'Moraxellaceae'	'Acinetobacter'	'Acinetobacter baumannii'
'GCF_003812065.1'	'Pseudomonadota'	'Gammaproteobacteria'	'Moraxellales'	'Moraxellaceae'	'Acinetobacter'	'Acinetobacter baumannii'
'GCF_000746605.1'	'Pseudomonadota'	'Gammaproteobacteria'	'Moraxellales'	'Moraxellaceae'	'Acinetobacter'	'Acinetobacter baumannii'
'GCF_000746605.1'	'Pseudomonadota'	'Gammaproteobacteria'	'Moraxellales'	'Moraxellaceae'	'Acinetobacter'	'Acinetobacter baumannii'
'GCF_000746605.1'	'Pseudomonadota'	'Gammaproteobacteria'	'Moraxellales'	'Moraxellaceae'	'Acinetobacter'	'Acinetobacter baumannii'
'GCF_007107525.1'	'Pseudomonadota'	'Gammaproteobacteria'	'Moraxellales'	'Moraxellaceae'	'Acinetobacter'	'Acinetobacter baumannii'
'GCF_007107525.1'	'Pseudomonadota'	'Gammaproteobacteria'	'Moraxellales'	'Moraxellaceae'	'Acinetobacter'	'Acinetobacter baumannii'
'GCF_007107525.1'	'Pseudomonadota'	'Gammaproteobacteria'	'Moraxellales'	'Moraxellaceae'	'Acinetobacter'	'Acinetobacter baumannii'
'GCF_002902885.1'	'Pseudomonadota'	'Gammaproteobacteria'	'Moraxellales'	'Moraxellaceae'	'Acinetobacter'	'Acinetobacter baumannii'
'GCF_002902885.1'	'Pseudomonadota'	'Gammaproteobacteria'	'Moraxellales'	'Moraxellaceae'	'Acinetobacter'	'Acinetobacter baumannii'
'GCF_002902885.1'	'Pseudomonadota'	'Gammaproteobacteria'	'Moraxellales'	'Moraxellaceae'	'Acinetobacter'	'Acinetobacter baumannii'
'GCF_003812385.1'	'Pseudomonadota'	'Gammaproteobacteria'	'Moraxellales'	'Moraxellaceae'	'Acinetobacter'	'Acinetobacter baumannii'
'GCF_003812385.1'	'Pseudomonadota'	'Gammaproteobacteria'	'Moraxellales'	'Moraxellaceae'	'Acinetobacter'	'Acinetobacter baumannii'
'GCF_003812385.1'	'Pseudomonadota'	'Gammaproteobacteria'	'Moraxellales'	'Moraxellaceae'	'Acinetobacter'	'Acinetobacter baumannii'
'GCF_003812385.1'	'Pseudomonadota'	'Gammaproteobacteria'	'Moraxellales'	'Moraxellaceae'	'Acinetobacter'	'Acinetobacter baumannii'
'GCF_005280675.1'	'Pseudomonadota'	'Gammaproteobacteria'	'Moraxellales'	'Moraxellaceae'	'Acinetobacter'	'Acinetobacter baumannii'
'GCF_005280675.1'	'Pseudomonadota'	'Gammaproteobacteria'	'Moraxellales'	'Moraxellaceae'	'Acinetobacter'	'Acinetobacter baumannii'
'GCF_012931605.1'	'Pseudomonadota'	'Gammaproteobacteria'	'Moraxellales'	'Moraxellaceae'	'Acinetobacter'	'Acinetobacter baumannii'
'GCF_012931605.1'	'Pseudomonadota'	'Gammaproteobacteria'	'Moraxellales'	'Moraxellaceae'	'Acinetobacter'	'Acinetobacter baumannii'
'GCF_012931605.1'	'Pseudomonadota'	'Gammaproteobacteria'	'Moraxellales'	'Moraxellaceae'	'Acinetobacter'	'Acinetobacter baumannii'
'GCF_004564115.1'	'Pseudomonadota'	'Gammaproteobacteria'	'Moraxellales'	'Moraxellaceae'	'Acinetobacter'	'Acinetobacter baumannii'
'GCF_004564115.1'	'Pseudomonadota'	'Gammaproteobacteria'	'Moraxellales'	'Moraxellaceae'	'Acinetobacter'	'Acinetobacter baumannii'
'GCF_004564115.1'	'Pseudomonadota'	'Gammaproteobacteria'	'Moraxellales'	'Moraxellaceae'	'Acinetobacter'	'Acinetobacter baumannii'
'GCF_004194555.1'	'Pseudomonadota'	'Gammaproteobacteria'	'Moraxellales'	'Moraxellaceae'	'Acinetobacter'	'Acinetobacter baumannii'
'GCF_004194555.1'	'Pseudomonadota'	'Gammaproteobacteria'	'Moraxellales'	'Moraxellaceae'	'Acinetobacter'	'Acinetobacter baumannii'
'GCF_004194555.1'	'Pseudomonadota'	'Gammaproteobacteria'	'Moraxellales'	'Moraxellaceae'	'Acinetobacter'	'Acinetobacter baumannii'
'GCF_003522705.1'	'Pseudomonadota'	'Gammaproteobacteria'	'Moraxellales'	'Moraxellaceae'	'Acinetobacter'	'Acinetobacter baumannii'
'GCF_003522705.1'	'Pseudomonadota'	'Gammaproteobacteria'	'Moraxellales'	'Moraxellaceae'	'Acinetobacter'	'Acinetobacter baumannii'
'GCF_001721705.1'	'Pseudomonadota'	'Gammaproteobacteria'	'Moraxellales'	'Moraxellaceae'	'Acinetobacter'	'Acinetobacter baumannii'
'GCF_001721705.1'	'Pseudomonadota'	'Gammaproteobacteria'	'Moraxellales'	'Moraxellaceae'	'Acinetobacter'	'Acinetobacter baumannii'
'GCF_001721705.1'	'Pseudomonadota'	'Gammaproteobacteria'	'Moraxellales'	'Moraxellaceae'	'Acinetobacter'	'Acinetobacter baumannii'
'GCF_004564095.1'	'Pseudomonadota'	'Gammaproteobacteria'	'Moraxellales'	'Moraxellaceae'	'Acinetobacter'	'Acinetobacter baumannii'
'GCF_004564095.1'	'Pseudomonadota'	'Gammaproteobacteria'	'Moraxellales'	'Moraxellaceae'	'Acinetobacter'	'Acinetobacter baumannii'
'GCF_004564095.1'	'Pseudomonadota'	'Gammaproteobacteria'	'Moraxellales'	'Moraxellaceae'	'Acinetobacter'	'Acinetobacter baumannii'
'GCF_002504145.1'	'Pseudomonadota'	'Gammaproteobacteria'	'Moraxellales'	'Moraxellaceae'	'Acinetobacter'	'Acinetobacter baumannii'
'GCF_002504145.1'	'Pseudomonadota'	'Gammaproteobacteria'	'Moraxellales'	'Moraxellaceae'	'Acinetobacter'	'Acinetobacter baumannii'
'GCF_005280375.1'	'Pseudomonadota'	'Gammaproteobacteria'	'Moraxellales'	'Moraxellaceae'	'Acinetobacter'	'Acinetobacter baumannii'
'GCF_005280375.1'	'Pseudomonadota'	'Gammaproteobacteria'	'Moraxellales'	'Moraxellaceae'	'Acinetobacter'	'Acinetobacter baumannii'
'GCF_005280375.1'	'Pseudomonadota'	'Gammaproteobacteria'	'Moraxellales'	'Moraxellaceae'	'Acinetobacter'	'Acinetobacter baumannii'
'GCF_002441975.1'	'Pseudomonadota'	'Betaproteobacteria'	'Burkholderiales'	'Comamonadaceae'	'Acidovorax'	'Acidovorax citrulli'
'GCF_002441975.1'	'Pseudomonadota'	'Betaproteobacteria'	'Burkholderiales'	'Comamonadaceae'	'Acidovorax'	'Acidovorax citrulli'
'GCF_002441975.1'	'Pseudomonadota'	'Betaproteobacteria'	'Burkholderiales'	'Comamonadaceae'	'Acidovorax'	'Acidovorax citrulli'
'GCF_022494945.1'	'Pseudomonadota'	'Betaproteobacteria'	'Burkholderiales'	'Comamonadaceae'	'Acidovorax'	'Acidovorax citrulli'
'GCF_022494945.1'	'Pseudomonadota'	'Betaproteobacteria'	'Burkholderiales'	'Comamonadaceae'	'Acidovorax'	'Acidovorax citrulli'
'GCF_022494945.1'	'Pseudomonadota'	'Betaproteobacteria'	'Burkholderiales'	'Comamonadaceae'	'Acidovorax'	'Acidovorax citrulli'
'GCF_022494965.1'	'Pseudomonadota'	'Betaproteobacteria'	'Burkholderiales'	'Comamonadaceae'	'Acidovorax'	'Acidovorax citrulli'
'GCF_022494965.1'	'Pseudomonadota'	'Betaproteobacteria'	'Burkholderiales'	'Comamonadaceae'	'Acidovorax'	'Acidovorax citrulli'
'GCF_022494965.1'	'Pseudomonadota'	'Betaproteobacteria'	'Burkholderiales'	'Comamonadaceae'	'Acidovorax'	'Acidovorax citrulli'
'GCF_020783275.1'	'Pseudomonadota'	'Betaproteobacteria'	'Burkholderiales'	'Comamonadaceae'	'Acidovorax'	'Acidovorax citrulli'
'GCF_020783275.1'	'Pseudomonadota'	'Betaproteobacteria'	'Burkholderiales'	'Comamonadaceae'	'Acidovorax'	'Acidovorax citrulli'
'GCF_020783275.1'	'Pseudomonadota'	'Betaproteobacteria'	'Burkholderiales'	'Comamonadaceae'	'Acidovorax'	'Acidovorax citrulli'
'GCF_020783295.1'	'Pseudomonadota'	'Betaproteobacteria'	'Burkholderiales'	'Comamonadaceae'	'Acidovorax'	'Acidovorax citrulli'
'GCF_020783295.1'	'Pseudomonadota'	'Betaproteobacteria'	'Burkholderiales'	'Comamonadaceae'	'Acidovorax'	'Acidovorax citrulli'
'GCF_020783295.1'	'Pseudomonadota'	'Betaproteobacteria'	'Burkholderiales'	'Comamonadaceae'	'Acidovorax'	'Acidovorax citrulli'
'GCF_001593665.2'	'Pseudomonadota'	'Betaproteobacteria'	'Burkholderiales'	'Comamonadaceae'	'Acidovorax'	'Acidovorax citrulli'
'GCF_001593665.2'	'Pseudomonadota'	'Betaproteobacteria'	'Burkholderiales'	'Comamonadaceae'	'Acidovorax'	'Acidovorax citrulli'
'GCF_001593665.2'	'Pseudomonadota'	'Betaproteobacteria'	'Burkholderiales'	'Comamonadaceae'	'Acidovorax'	'Acidovorax citrulli'
'GCF_000015325.1'	'Pseudomonadota'	'Betaproteobacteria'	'Burkholderiales'	'Comamonadaceae'	'Acidovorax'	'Acidovorax citrulli'
'GCF_000015325.1'	'Pseudomonadota'	'Betaproteobacteria'	'Burkholderiales'	'Comamonadaceae'	'Acidovorax'	'Acidovorax citrulli'
'GCF_000015325.1'	'Pseudomonadota'	'Betaproteobacteria'	'Burkholderiales'	'Comamonadaceae'	'Acidovorax'	'Acidovorax citrulli'
'GCF_020510705.1'	'Pseudomonadota'	'Betaproteobacteria'	'Burkholderiales'	'Comamonadaceae'	'Acidovorax'	'Acidovorax radicis'
'GCF_020510705.1'	'Pseudomonadota'	'Betaproteobacteria'	'Burkholderiales'	'Comamonadaceae'	'Acidovorax'	'Acidovorax radicis'
'GCF_020510705.1'	'Pseudomonadota'	'Betaproteobacteria'	'Burkholderiales'	'Comamonadaceae'	'Acidovorax'	'Acidovorax radicis'
'GCF_028473645.1'	'Pseudomonadota'	'Betaproteobacteria'	'Burkholderiales'	'Comamonadaceae'	'Acidovorax'	'Acidovorax sp. GBBC 1281'
'GCF_028473645.1'	'Pseudomonadota'	'Betaproteobacteria'	'Burkholderiales'	'Comamonadaceae'	'Acidovorax'	'Acidovorax sp. GBBC 1281'
'GCF_028473645.1'	'Pseudomonadota'	'Betaproteobacteria'	'Burkholderiales'	'Comamonadaceae'	'Acidovorax'	'Acidovorax sp. GBBC 1281'
'GCF_028473645.1'	'Pseudomonadota'	'Betaproteobacteria'	'Burkholderiales'	'Comamonadaceae'	'Acidovorax'	'Acidovorax sp. GBBC 1281'
'GCF_028473585.1'	'Pseudomonadota'	'Betaproteobacteria'	'Burkholderiales'	'Comamonadaceae'	'Acidovorax'	'Acidovorax sp. NCPPB 3859'
'GCF_028473585.1'	'Pseudomonadota'	'Betaproteobacteria'	'Burkholderiales'	'Comamonadaceae'	'Acidovorax'	'Acidovorax sp. NCPPB 3859'
'GCF_028473585.1'	'Pseudomonadota'	'Betaproteobacteria'	'Burkholderiales'	'Comamonadaceae'	'Acidovorax'	'Acidovorax sp. NCPPB 3859'
'GCF_028473585.1'	'Pseudomonadota'	'Betaproteobacteria'	'Burkholderiales'	'Comamonadaceae'	'Acidovorax'	'Acidovorax sp. NCPPB 3859'
'GCF_028473585.1'	'Pseudomonadota'	'Betaproteobacteria'	'Burkholderiales'	'Comamonadaceae'	'Acidovorax'	'Acidovorax sp. NCPPB 3859'
'GCF_028473585.1'	'Pseudomonadota'	'Betaproteobacteria'	'Burkholderiales'	'Comamonadaceae'	'Acidovorax'	'Acidovorax sp. NCPPB 3859'
'GCF_028473585.1'	'Pseudomonadota'	'Betaproteobacteria'	'Burkholderiales'	'Comamonadaceae'	'Acidovorax'	'Acidovorax sp. NCPPB 3859'
'GCF_028473465.1'	'Pseudomonadota'	'Betaproteobacteria'	'Burkholderiales'	'Comamonadaceae'	'Acidovorax'	'Acidovorax sp. GBBC 712'
'GCF_028473465.1'	'Pseudomonadota'	'Betaproteobacteria'	'Burkholderiales'	'Comamonadaceae'	'Acidovorax'	'Acidovorax sp. GBBC 712'
'GCF_028473465.1'	'Pseudomonadota'	'Betaproteobacteria'	'Burkholderiales'	'Comamonadaceae'	'Acidovorax'	'Acidovorax sp. GBBC 712'
'GCF_028473465.1'	'Pseudomonadota'	'Betaproteobacteria'	'Burkholderiales'	'Comamonadaceae'	'Acidovorax'	'Acidovorax sp. GBBC 712'
'GCF_028473465.1'	'Pseudomonadota'	'Betaproteobacteria'	'Burkholderiales'	'Comamonadaceae'	'Acidovorax'	'Acidovorax sp. GBBC 712'
'GCF_028473465.1'	'Pseudomonadota'	'Betaproteobacteria'	'Burkholderiales'	'Comamonadaceae'	'Acidovorax'	'Acidovorax sp. GBBC 712'
'GCF_028473465.1'	'Pseudomonadota'	'Betaproteobacteria'	'Burkholderiales'	'Comamonadaceae'	'Acidovorax'	'Acidovorax sp. GBBC 712'
'GCF_028473605.1'	'Pseudomonadota'	'Betaproteobacteria'	'Burkholderiales'	'Comamonadaceae'	'Acidovorax'	'Acidovorax sp. NCPPB 3576'
'GCF_028473605.1'	'Pseudomonadota'	'Betaproteobacteria'	'Burkholderiales'	'Comamonadaceae'	'Acidovorax'	'Acidovorax sp. NCPPB 3576'
'GCF_028473605.1'	'Pseudomonadota'	'Betaproteobacteria'	'Burkholderiales'	'Comamonadaceae'	'Acidovorax'	'Acidovorax sp. NCPPB 3576'
'GCF_028473605.1'	'Pseudomonadota'	'Betaproteobacteria'	'Burkholderiales'	'Comamonadaceae'	'Acidovorax'	'Acidovorax sp. NCPPB 3576'
'GCF_028473605.1'	'Pseudomonadota'	'Betaproteobacteria'	'Burkholderiales'	'Comamonadaceae'	'Acidovorax'	'Acidovorax sp. NCPPB 3576'
'GCF_028473625.1'	'Pseudomonadota'	'Betaproteobacteria'	'Burkholderiales'	'Comamonadaceae'	'Acidovorax'	'Acidovorax sp. NCPPB 2350'
'GCF_028473625.1'	'Pseudomonadota'	'Betaproteobacteria'	'Burkholderiales'	'Comamonadaceae'	'Acidovorax'	'Acidovorax sp. NCPPB 2350'
'GCF_028473625.1'	'Pseudomonadota'	'Betaproteobacteria'	'Burkholderiales'	'Comamonadaceae'	'Acidovorax'	'Acidovorax sp. NCPPB 2350'
'GCF_028473625.1'	'Pseudomonadota'	'Betaproteobacteria'	'Burkholderiales'	'Comamonadaceae'	'Acidovorax'	'Acidovorax sp. NCPPB 2350'
'GCF_028473625.1'	'Pseudomonadota'	'Betaproteobacteria'	'Burkholderiales'	'Comamonadaceae'	'Acidovorax'	'Acidovorax sp. NCPPB 2350'
'GCF_000302535.1'	'Pseudomonadota'	'Betaproteobacteria'	'Burkholderiales'	'Comamonadaceae'	'Acidovorax'	'Acidovorax sp. KKS102'
'GCF_003669015.1'	'Pseudomonadota'	'Betaproteobacteria'	'Burkholderiales'	'Comamonadaceae'	'Acidovorax'	'Acidovorax sp. 1608163'
'GCF_003669015.1'	'Pseudomonadota'	'Betaproteobacteria'	'Burkholderiales'	'Comamonadaceae'	'Acidovorax'	'Acidovorax sp. 1608163'
'GCF_003669015.1'	'Pseudomonadota'	'Betaproteobacteria'	'Burkholderiales'	'Comamonadaceae'	'Acidovorax'	'Acidovorax sp. 1608163'
'GCF_003669015.1'	'Pseudomonadota'	'Betaproteobacteria'	'Burkholderiales'	'Comamonadaceae'	'Acidovorax'	'Acidovorax sp. 1608163'
'GCF_003669015.1'	'Pseudomonadota'	'Betaproteobacteria'	'Burkholderiales'	'Comamonadaceae'	'Acidovorax'	'Acidovorax sp. 1608163'
'GCF_003669015.1'	'Pseudomonadota'	'Betaproteobacteria'	'Burkholderiales'	'Comamonadaceae'	'Acidovorax'	'Acidovorax sp. 1608163'
'GCF_003669015.1'	'Pseudomonadota'	'Betaproteobacteria'	'Burkholderiales'	'Comamonadaceae'	'Acidovorax'	'Acidovorax sp. 1608163'
'GCF_021496925.1'	'Pseudomonadota'	'Betaproteobacteria'	'Burkholderiales'	'Comamonadaceae'	'Acidovorax'	'Acidovorax sp. YS12'
'GCF_021496925.1'	'Pseudomonadota'	'Betaproteobacteria'	'Burkholderiales'	'Comamonadaceae'	'Acidovorax'	'Acidovorax sp. YS12'
'GCF_021496925.1'	'Pseudomonadota'	'Betaproteobacteria'	'Burkholderiales'	'Comamonadaceae'	'Acidovorax'	'Acidovorax sp. YS12'
'GCF_021496925.1'	'Pseudomonadota'	'Betaproteobacteria'	'Burkholderiales'	'Comamonadaceae'	'Acidovorax'	'Acidovorax sp. YS12'
'GCF_021496925.1'	'Pseudomonadota'	'Betaproteobacteria'	'Burkholderiales'	'Comamonadaceae'	'Acidovorax'	'Acidovorax sp. YS12'
'GCF_021496925.1'	'Pseudomonadota'	'Betaproteobacteria'	'Burkholderiales'	'Comamonadaceae'	'Acidovorax'	'Acidovorax sp. YS12'
'GCF_021496925.1'	'Pseudomonadota'	'Betaproteobacteria'	'Burkholderiales'	'Comamonadaceae'	'Acidovorax'	'Acidovorax sp. YS12'
'GCF_021496925.1'	'Pseudomonadota'	'Betaproteobacteria'	'Burkholderiales'	'Comamonadaceae'	'Acidovorax'	'Acidovorax sp. YS12'
'GCF_021496925.1'	'Pseudomonadota'	'Betaproteobacteria'	'Burkholderiales'	'Comamonadaceae'	'Acidovorax'	'Acidovorax sp. YS12'
'GCF_021496925.1'	'Pseudomonadota'	'Betaproteobacteria'	'Burkholderiales'	'Comamonadaceae'	'Acidovorax'	'Acidovorax sp. YS12'
'GCF_021496925.1'	'Pseudomonadota'	'Betaproteobacteria'	'Burkholderiales'	'Comamonadaceae'	'Acidovorax'	'Acidovorax sp. YS12'
'GCF_021496925.1'	'Pseudomonadota'	'Betaproteobacteria'	'Burkholderiales'	'Comamonadaceae'	'Acidovorax'	'Acidovorax sp. YS12'
'GCF_021496925.1'	'Pseudomonadota'	'Betaproteobacteria'	'Burkholderiales'	'Comamonadaceae'	'Acidovorax'	'Acidovorax sp. YS12'
'GCF_021496925.1'	'Pseudomonadota'	'Betaproteobacteria'	'Burkholderiales'	'Comamonadaceae'	'Acidovorax'	'Acidovorax sp. YS12'
'GCF_021496925.1'	'Pseudomonadota'	'Betaproteobacteria'	'Burkholderiales'	'Comamonadaceae'	'Acidovorax'	'Acidovorax sp. YS12'
'GCF_021496925.1'	'Pseudomonadota'	'Betaproteobacteria'	'Burkholderiales'	'Comamonadaceae'	'Acidovorax'	'Acidovorax sp. YS12'
'GCF_021496925.1'	'Pseudomonadota'	'Betaproteobacteria'	'Burkholderiales'	'Comamonadaceae'	'Acidovorax'	'Acidovorax sp. YS12'
'GCF_021496925.1'	'Pseudomonadota'	'Betaproteobacteria'	'Burkholderiales'	'Comamonadaceae'	'Acidovorax'	'Acidovorax sp. YS12'
'GCF_021496925.1'	'Pseudomonadota'	'Betaproteobacteria'	'Burkholderiales'	'Comamonadaceae'	'Acidovorax'	'Acidovorax sp. YS12'
'GCF_021496925.1'	'Pseudomonadota'	'Betaproteobacteria'	'Burkholderiales'	'Comamonadaceae'	'Acidovorax'	'Acidovorax sp. YS12'
'GCF_021496925.1'	'Pseudomonadota'	'Betaproteobacteria'	'Burkholderiales'	'Comamonadaceae'	'Acidovorax'	'Acidovorax sp. YS12'
'GCF_021496925.1'	'Pseudomonadota'	'Betaproteobacteria'	'Burkholderiales'	'Comamonadaceae'	'Acidovorax'	'Acidovorax sp. YS12'
'GCF_021496925.1'	'Pseudomonadota'	'Betaproteobacteria'	'Burkholderiales'	'Comamonadaceae'	'Acidovorax'	'Acidovorax sp. YS12'
'GCF_021496925.1'	'Pseudomonadota'	'Betaproteobacteria'	'Burkholderiales'	'Comamonadaceae'	'Acidovorax'	'Acidovorax sp. YS12'
'GCF_023634805.2'	'Pseudomonadota'	'Betaproteobacteria'	'Burkholderiales'	'Comamonadaceae'	'Acidovorax'	'Acidovorax sp. 5MLIR'
'GCF_023634805.2'	'Pseudomonadota'	'Betaproteobacteria'	'Burkholderiales'	'Comamonadaceae'	'Acidovorax'	'Acidovorax sp. 5MLIR'
'GCF_023634805.2'	'Pseudomonadota'	'Betaproteobacteria'	'Burkholderiales'	'Comamonadaceae'	'Acidovorax'	'Acidovorax sp. 5MLIR'
'GCF_011303755.1'	'Pseudomonadota'	'Betaproteobacteria'	'Burkholderiales'	'Comamonadaceae'	'Acidovorax'	'Acidovorax sp. HDW3'
'GCF_020911985.1'	'Pseudomonadota'	'Gammaproteobacteria'	'Moraxellales'	'Moraxellaceae'	'Acinetobacter'	'Acinetobacter baumannii'
'GCF_020911985.1'	'Pseudomonadota'	'Gammaproteobacteria'	'Moraxellales'	'Moraxellaceae'	'Acinetobacter'	'Acinetobacter baumannii'
'GCF_020911985.1'	'Pseudomonadota'	'Gammaproteobacteria'	'Moraxellales'	'Moraxellaceae'	'Acinetobacter'	'Acinetobacter baumannii'
'GCF_022870045.1'	'Pseudomonadota'	'Gammaproteobacteria'	'Moraxellales'	'Moraxellaceae'	'Acinetobacter'	'Acinetobacter baumannii'
'GCF_022870045.1'	'Pseudomonadota'	'Gammaproteobacteria'	'Moraxellales'	'Moraxellaceae'	'Acinetobacter'	'Acinetobacter baumannii'
'GCF_022870045.1'	'Pseudomonadota'	'Gammaproteobacteria'	'Moraxellales'	'Moraxellaceae'	'Acinetobacter'	'Acinetobacter baumannii'
'GCF_014672755.1'	'Pseudomonadota'	'Gammaproteobacteria'	'Moraxellales'	'Moraxellaceae'	'Acinetobacter'	'Acinetobacter baumannii'
'GCF_014672755.1'	'Pseudomonadota'	'Gammaproteobacteria'	'Moraxellales'	'Moraxellaceae'	'Acinetobacter'	'Acinetobacter baumannii'
'GCF_014672755.1'	'Pseudomonadota'	'Gammaproteobacteria'	'Moraxellales'	'Moraxellaceae'	'Acinetobacter'	'Acinetobacter baumannii'
'GCF_014874575.1'	'Pseudomonadota'	'Gammaproteobacteria'	'Moraxellales'	'Moraxellaceae'	'Acinetobacter'	'Acinetobacter baumannii'
'GCF_014874575.1'	'Pseudomonadota'	'Gammaproteobacteria'	'Moraxellales'	'Moraxellaceae'	'Acinetobacter'	'Acinetobacter baumannii'
'GCF_014874575.1'	'Pseudomonadota'	'Gammaproteobacteria'	'Moraxellales'	'Moraxellaceae'	'Acinetobacter'	'Acinetobacter baumannii'
'GCF_021484905.1'	'Pseudomonadota'	'Gammaproteobacteria'	'Moraxellales'	'Moraxellaceae'	'Acinetobacter'	'Acinetobacter baumannii'
'GCF_021484905.1'	'Pseudomonadota'	'Gammaproteobacteria'	'Moraxellales'	'Moraxellaceae'	'Acinetobacter'	'Acinetobacter baumannii'
'GCF_021484905.1'	'Pseudomonadota'	'Gammaproteobacteria'	'Moraxellales'	'Moraxellaceae'	'Acinetobacter'	'Acinetobacter baumannii'
'GCF_023360975.1'	'Pseudomonadota'	'Gammaproteobacteria'	'Moraxellales'	'Moraxellaceae'	'Acinetobacter'	'Acinetobacter baumannii'
'GCF_023360975.1'	'Pseudomonadota'	'Gammaproteobacteria'	'Moraxellales'	'Moraxellaceae'	'Acinetobacter'	'Acinetobacter baumannii'
'GCF_023360975.1'	'Pseudomonadota'	'Gammaproteobacteria'	'Moraxellales'	'Moraxellaceae'	'Acinetobacter'	'Acinetobacter baumannii'
'GCF_012934905.1'	'Pseudomonadota'	'Gammaproteobacteria'	'Moraxellales'	'Moraxellaceae'	'Acinetobacter'	'Acinetobacter baumannii'
'GCF_012934905.1'	'Pseudomonadota'	'Gammaproteobacteria'	'Moraxellales'	'Moraxellaceae'	'Acinetobacter'	'Acinetobacter baumannii'
'GCF_012934905.1'	'Pseudomonadota'	'Gammaproteobacteria'	'Moraxellales'	'Moraxellaceae'	'Acinetobacter'	'Acinetobacter baumannii'
'GCF_018808925.1'	'Pseudomonadota'	'Gammaproteobacteria'	'Moraxellales'	'Moraxellaceae'	'Acinetobacter'	'Acinetobacter baumannii'
'GCF_018808925.1'	'Pseudomonadota'	'Gammaproteobacteria'	'Moraxellales'	'Moraxellaceae'	'Acinetobacter'	'Acinetobacter baumannii'
'GCF_018808925.1'	'Pseudomonadota'	'Gammaproteobacteria'	'Moraxellales'	'Moraxellaceae'	'Acinetobacter'	'Acinetobacter baumannii'
'GCF_021899715.1'	'Pseudomonadota'	'Gammaproteobacteria'	'Moraxellales'	'Moraxellaceae'	'Acinetobacter'	'Acinetobacter baumannii'
'GCF_021899715.1'	'Pseudomonadota'	'Gammaproteobacteria'	'Moraxellales'	'Moraxellaceae'	'Acinetobacter'	'Acinetobacter baumannii'
'GCF_021899715.1'	'Pseudomonadota'	'Gammaproteobacteria'	'Moraxellales'	'Moraxellaceae'	'Acinetobacter'	'Acinetobacter baumannii'
'GCF_012935005.1'	'Pseudomonadota'	'Gammaproteobacteria'	'Moraxellales'	'Moraxellaceae'	'Acinetobacter'	'Acinetobacter baumannii'
'GCF_012935005.1'	'Pseudomonadota'	'Gammaproteobacteria'	'Moraxellales'	'Moraxellaceae'	'Acinetobacter'	'Acinetobacter baumannii'
'GCF_012935005.1'	'Pseudomonadota'	'Gammaproteobacteria'	'Moraxellales'	'Moraxellaceae'	'Acinetobacter'	'Acinetobacter baumannii'
'GCF_021609965.1'	'Pseudomonadota'	'Gammaproteobacteria'	'Moraxellales'	'Moraxellaceae'	'Acinetobacter'	'Acinetobacter baumannii'
'GCF_021609965.1'	'Pseudomonadota'	'Gammaproteobacteria'	'Moraxellales'	'Moraxellaceae'	'Acinetobacter'	'Acinetobacter baumannii'
'GCF_021609965.1'	'Pseudomonadota'	'Gammaproteobacteria'	'Moraxellales'	'Moraxellaceae'	'Acinetobacter'	'Acinetobacter baumannii'
'GCF_022459155.1'	'Pseudomonadota'	'Gammaproteobacteria'	'Moraxellales'	'Moraxellaceae'	'Acinetobacter'	'Acinetobacter baumannii'
'GCF_022459155.1'	'Pseudomonadota'	'Gammaproteobacteria'	'Moraxellales'	'Moraxellaceae'	'Acinetobacter'	'Acinetobacter baumannii'
'GCF_022459155.1'	'Pseudomonadota'	'Gammaproteobacteria'	'Moraxellales'	'Moraxellaceae'	'Acinetobacter'	'Acinetobacter baumannii'
'GCF_022459415.1'	'Pseudomonadota'	'Gammaproteobacteria'	'Moraxellales'	'Moraxellaceae'	'Acinetobacter'	'Acinetobacter baumannii'
'GCF_022459415.1'	'Pseudomonadota'	'Gammaproteobacteria'	'Moraxellales'	'Moraxellaceae'	'Acinetobacter'	'Acinetobacter baumannii'
'GCF_022459415.1'	'Pseudomonadota'	'Gammaproteobacteria'	'Moraxellales'	'Moraxellaceae'	'Acinetobacter'	'Acinetobacter baumannii'
'GCF_015732435.1'	'Pseudomonadota'	'Gammaproteobacteria'	'Moraxellales'	'Moraxellaceae'	'Acinetobacter'	'Acinetobacter baumannii'
'GCF_015732435.1'	'Pseudomonadota'	'Gammaproteobacteria'	'Moraxellales'	'Moraxellaceae'	'Acinetobacter'	'Acinetobacter baumannii'
'GCF_022548575.1'	'Pseudomonadota'	'Gammaproteobacteria'	'Moraxellales'	'Moraxellaceae'	'Acinetobacter'	'Acinetobacter baumannii'
'GCF_022548575.1'	'Pseudomonadota'	'Gammaproteobacteria'	'Moraxellales'	'Moraxellaceae'	'Acinetobacter'	'Acinetobacter baumannii'
'GCF_022548575.1'	'Pseudomonadota'	'Gammaproteobacteria'	'Moraxellales'	'Moraxellaceae'	'Acinetobacter'	'Acinetobacter baumannii'
'GCF_012931625.1'	'Pseudomonadota'	'Gammaproteobacteria'	'Moraxellales'	'Moraxellaceae'	'Acinetobacter'	'Acinetobacter baumannii'
'GCF_012931625.1'	'Pseudomonadota'	'Gammaproteobacteria'	'Moraxellales'	'Moraxellaceae'	'Acinetobacter'	'Acinetobacter baumannii'
'GCF_012931625.1'	'Pseudomonadota'	'Gammaproteobacteria'	'Moraxellales'	'Moraxellaceae'	'Acinetobacter'	'Acinetobacter baumannii'
'GCF_023361075.1'	'Pseudomonadota'	'Gammaproteobacteria'	'Moraxellales'	'Moraxellaceae'	'Acinetobacter'	'Acinetobacter baumannii'
'GCF_023361075.1'	'Pseudomonadota'	'Gammaproteobacteria'	'Moraxellales'	'Moraxellaceae'	'Acinetobacter'	'Acinetobacter baumannii'
'GCF_017724155.1'	'Pseudomonadota'	'Gammaproteobacteria'	'Moraxellales'	'Moraxellaceae'	'Acinetobacter'	'Acinetobacter baumannii'
'GCF_017724155.1'	'Pseudomonadota'	'Gammaproteobacteria'	'Moraxellales'	'Moraxellaceae'	'Acinetobacter'	'Acinetobacter baumannii'
'GCF_017724155.1'	'Pseudomonadota'	'Gammaproteobacteria'	'Moraxellales'	'Moraxellaceae'	'Acinetobacter'	'Acinetobacter baumannii'
'GCF_017726495.1'	'Pseudomonadota'	'Gammaproteobacteria'	'Moraxellales'	'Moraxellaceae'	'Acinetobacter'	'Acinetobacter baumannii'
'GCF_017726495.1'	'Pseudomonadota'	'Gammaproteobacteria'	'Moraxellales'	'Moraxellaceae'	'Acinetobacter'	'Acinetobacter baumannii'
'GCF_017726495.1'	'Pseudomonadota'	'Gammaproteobacteria'	'Moraxellales'	'Moraxellaceae'	'Acinetobacter'	'Acinetobacter baumannii'
'GCF_017724115.1'	'Pseudomonadota'	'Gammaproteobacteria'	'Moraxellales'	'Moraxellaceae'	'Acinetobacter'	'Acinetobacter baumannii'
'GCF_017724115.1'	'Pseudomonadota'	'Gammaproteobacteria'	'Moraxellales'	'Moraxellaceae'	'Acinetobacter'	'Acinetobacter baumannii'
'GCF_017724115.1'	'Pseudomonadota'	'Gammaproteobacteria'	'Moraxellales'	'Moraxellaceae'	'Acinetobacter'	'Acinetobacter baumannii'
'GCF_017724215.1'	'Pseudomonadota'	'Gammaproteobacteria'	'Moraxellales'	'Moraxellaceae'	'Acinetobacter'	'Acinetobacter baumannii'
'GCF_017724215.1'	'Pseudomonadota'	'Gammaproteobacteria'	'Moraxellales'	'Moraxellaceae'	'Acinetobacter'	'Acinetobacter baumannii'
'GCF_017724215.1'	'Pseudomonadota'	'Gammaproteobacteria'	'Moraxellales'	'Moraxellaceae'	'Acinetobacter'	'Acinetobacter baumannii'
'GCF_017726555.1'	'Pseudomonadota'	'Gammaproteobacteria'	'Moraxellales'	'Moraxellaceae'	'Acinetobacter'	'Acinetobacter baumannii'
'GCF_017726555.1'	'Pseudomonadota'	'Gammaproteobacteria'	'Moraxellales'	'Moraxellaceae'	'Acinetobacter'	'Acinetobacter baumannii'
'GCF_017726555.1'	'Pseudomonadota'	'Gammaproteobacteria'	'Moraxellales'	'Moraxellaceae'	'Acinetobacter'	'Acinetobacter baumannii'
'GCF_012931645.1'	'Pseudomonadota'	'Gammaproteobacteria'	'Moraxellales'	'Moraxellaceae'	'Acinetobacter'	'Acinetobacter baumannii'
'GCF_012931645.1'	'Pseudomonadota'	'Gammaproteobacteria'	'Moraxellales'	'Moraxellaceae'	'Acinetobacter'	'Acinetobacter baumannii'
'GCF_012931645.1'	'Pseudomonadota'	'Gammaproteobacteria'	'Moraxellales'	'Moraxellaceae'	'Acinetobacter'	'Acinetobacter baumannii'
'GCF_017723975.1'	'Pseudomonadota'	'Gammaproteobacteria'	'Moraxellales'	'Moraxellaceae'	'Acinetobacter'	'Acinetobacter baumannii'
'GCF_017723975.1'	'Pseudomonadota'	'Gammaproteobacteria'	'Moraxellales'	'Moraxellaceae'	'Acinetobacter'	'Acinetobacter baumannii'
'GCF_017723975.1'	'Pseudomonadota'	'Gammaproteobacteria'	'Moraxellales'	'Moraxellaceae'	'Acinetobacter'	'Acinetobacter baumannii'
'GCF_016864295.1'	'Pseudomonadota'	'Gammaproteobacteria'	'Moraxellales'	'Moraxellaceae'	'Acinetobacter'	'Acinetobacter baumannii'
'GCF_016864295.1'	'Pseudomonadota'	'Gammaproteobacteria'	'Moraxellales'	'Moraxellaceae'	'Acinetobacter'	'Acinetobacter baumannii'
'GCF_016864295.1'	'Pseudomonadota'	'Gammaproteobacteria'	'Moraxellales'	'Moraxellaceae'	'Acinetobacter'	'Acinetobacter baumannii'
'GCF_019457715.1'	'Pseudomonadota'	'Gammaproteobacteria'	'Moraxellales'	'Moraxellaceae'	'Acinetobacter'	'Acinetobacter baumannii'
'GCF_019457715.1'	'Pseudomonadota'	'Gammaproteobacteria'	'Moraxellales'	'Moraxellaceae'	'Acinetobacter'	'Acinetobacter baumannii'
'GCF_019457715.1'	'Pseudomonadota'	'Gammaproteobacteria'	'Moraxellales'	'Moraxellaceae'	'Acinetobacter'	'Acinetobacter baumannii'
'GCF_023361195.1'	'Pseudomonadota'	'Gammaproteobacteria'	'Moraxellales'	'Moraxellaceae'	'Acinetobacter'	'Acinetobacter baumannii'
'GCF_023361195.1'	'Pseudomonadota'	'Gammaproteobacteria'	'Moraxellales'	'Moraxellaceae'	'Acinetobacter'	'Acinetobacter baumannii'
'GCF_023361195.1'	'Pseudomonadota'	'Gammaproteobacteria'	'Moraxellales'	'Moraxellaceae'	'Acinetobacter'	'Acinetobacter baumannii'
'GCF_013305465.1'	'Pseudomonadota'	'Gammaproteobacteria'	'Moraxellales'	'Moraxellaceae'	'Acinetobacter'	'Acinetobacter baumannii'
'GCF_013305465.1'	'Pseudomonadota'	'Gammaproteobacteria'	'Moraxellales'	'Moraxellaceae'	'Acinetobacter'	'Acinetobacter baumannii'
'GCF_013305465.1'	'Pseudomonadota'	'Gammaproteobacteria'	'Moraxellales'	'Moraxellaceae'	'Acinetobacter'	'Acinetobacter baumannii'
'GCF_017742855.1'	'Pseudomonadota'	'Gammaproteobacteria'	'Moraxellales'	'Moraxellaceae'	'Acinetobacter'	'Acinetobacter baumannii'
'GCF_017742855.1'	'Pseudomonadota'	'Gammaproteobacteria'	'Moraxellales'	'Moraxellaceae'	'Acinetobacter'	'Acinetobacter baumannii'
'GCF_017742855.1'	'Pseudomonadota'	'Gammaproteobacteria'	'Moraxellales'	'Moraxellaceae'	'Acinetobacter'	'Acinetobacter baumannii'
'GCF_023361055.1'	'Pseudomonadota'	'Gammaproteobacteria'	'Moraxellales'	'Moraxellaceae'	'Acinetobacter'	'Acinetobacter baumannii'
'GCF_023361055.1'	'Pseudomonadota'	'Gammaproteobacteria'	'Moraxellales'	'Moraxellaceae'	'Acinetobacter'	'Acinetobacter baumannii'
'GCF_023361055.1'	'Pseudomonadota'	'Gammaproteobacteria'	'Moraxellales'	'Moraxellaceae'	'Acinetobacter'	'Acinetobacter baumannii'
'GCF_017724195.1'	'Pseudomonadota'	'Gammaproteobacteria'	'Moraxellales'	'Moraxellaceae'	'Acinetobacter'	'Acinetobacter baumannii'
'GCF_017724195.1'	'Pseudomonadota'	'Gammaproteobacteria'	'Moraxellales'	'Moraxellaceae'	'Acinetobacter'	'Acinetobacter baumannii'
'GCF_017724195.1'	'Pseudomonadota'	'Gammaproteobacteria'	'Moraxellales'	'Moraxellaceae'	'Acinetobacter'	'Acinetobacter baumannii'
'GCF_017098205.2'	'Pseudomonadota'	'Gammaproteobacteria'	'Moraxellales'	'Moraxellaceae'	'Acinetobacter'	'Acinetobacter baumannii'
'GCF_017098205.2'	'Pseudomonadota'	'Gammaproteobacteria'	'Moraxellales'	'Moraxellaceae'	'Acinetobacter'	'Acinetobacter baumannii'
'GCF_017098205.2'	'Pseudomonadota'	'Gammaproteobacteria'	'Moraxellales'	'Moraxellaceae'	'Acinetobacter'	'Acinetobacter baumannii'
'GCF_023360995.1'	'Pseudomonadota'	'Gammaproteobacteria'	'Moraxellales'	'Moraxellaceae'	'Acinetobacter'	'Acinetobacter baumannii'
'GCF_023360995.1'	'Pseudomonadota'	'Gammaproteobacteria'	'Moraxellales'	'Moraxellaceae'	'Acinetobacter'	'Acinetobacter baumannii'
'GCF_023360995.1'	'Pseudomonadota'	'Gammaproteobacteria'	'Moraxellales'	'Moraxellaceae'	'Acinetobacter'	'Acinetobacter baumannii'
'GCF_022468195.1'	'Pseudomonadota'	'Gammaproteobacteria'	'Moraxellales'	'Moraxellaceae'	'Acinetobacter'	'Acinetobacter baumannii'
'GCF_022468195.1'	'Pseudomonadota'	'Gammaproteobacteria'	'Moraxellales'	'Moraxellaceae'	'Acinetobacter'	'Acinetobacter baumannii'
'GCF_022468195.1'	'Pseudomonadota'	'Gammaproteobacteria'	'Moraxellales'	'Moraxellaceae'	'Acinetobacter'	'Acinetobacter baumannii'
'GCF_023361175.1'	'Pseudomonadota'	'Gammaproteobacteria'	'Moraxellales'	'Moraxellaceae'	'Acinetobacter'	'Acinetobacter baumannii'
'GCF_023361175.1'	'Pseudomonadota'	'Gammaproteobacteria'	'Moraxellales'	'Moraxellaceae'	'Acinetobacter'	'Acinetobacter baumannii'
'GCF_023361175.1'	'Pseudomonadota'	'Gammaproteobacteria'	'Moraxellales'	'Moraxellaceae'	'Acinetobacter'	'Acinetobacter baumannii'
'GCF_021559695.1'	'Pseudomonadota'	'Gammaproteobacteria'	'Moraxellales'	'Moraxellaceae'	'Acinetobacter'	'Acinetobacter baumannii'
'GCF_021559695.1'	'Pseudomonadota'	'Gammaproteobacteria'	'Moraxellales'	'Moraxellaceae'	'Acinetobacter'	'Acinetobacter baumannii'
'GCF_021559695.1'	'Pseudomonadota'	'Gammaproteobacteria'	'Moraxellales'	'Moraxellaceae'	'Acinetobacter'	'Acinetobacter baumannii'
'GCF_023361235.1'	'Pseudomonadota'	'Gammaproteobacteria'	'Moraxellales'	'Moraxellaceae'	'Acinetobacter'	'Acinetobacter baumannii'
'GCF_023361235.1'	'Pseudomonadota'	'Gammaproteobacteria'	'Moraxellales'	'Moraxellaceae'	'Acinetobacter'	'Acinetobacter baumannii'
'GCF_023361235.1'	'Pseudomonadota'	'Gammaproteobacteria'	'Moraxellales'	'Moraxellaceae'	'Acinetobacter'	'Acinetobacter baumannii'
'GCF_023361255.1'	'Pseudomonadota'	'Gammaproteobacteria'	'Moraxellales'	'Moraxellaceae'	'Acinetobacter'	'Acinetobacter baumannii'
'GCF_023361255.1'	'Pseudomonadota'	'Gammaproteobacteria'	'Moraxellales'	'Moraxellaceae'	'Acinetobacter'	'Acinetobacter baumannii'
'GCF_023361255.1'	'Pseudomonadota'	'Gammaproteobacteria'	'Moraxellales'	'Moraxellaceae'	'Acinetobacter'	'Acinetobacter baumannii'
'GCF_022460295.1'	'Pseudomonadota'	'Gammaproteobacteria'	'Moraxellales'	'Moraxellaceae'	'Acinetobacter'	'Acinetobacter baumannii'
'GCF_022460295.1'	'Pseudomonadota'	'Gammaproteobacteria'	'Moraxellales'	'Moraxellaceae'	'Acinetobacter'	'Acinetobacter baumannii'
'GCF_022460295.1'	'Pseudomonadota'	'Gammaproteobacteria'	'Moraxellales'	'Moraxellaceae'	'Acinetobacter'	'Acinetobacter baumannii'
'GCF_021725415.1'	'Pseudomonadota'	'Gammaproteobacteria'	'Moraxellales'	'Moraxellaceae'	'Acinetobacter'	'Acinetobacter baumannii'
'GCF_021725415.1'	'Pseudomonadota'	'Gammaproteobacteria'	'Moraxellales'	'Moraxellaceae'	'Acinetobacter'	'Acinetobacter baumannii'
'GCF_021725415.1'	'Pseudomonadota'	'Gammaproteobacteria'	'Moraxellales'	'Moraxellaceae'	'Acinetobacter'	'Acinetobacter baumannii'
'GCF_013394285.1'	'Pseudomonadota'	'Gammaproteobacteria'	'Moraxellales'	'Moraxellaceae'	'Acinetobacter'	'Acinetobacter baumannii'
'GCF_013394285.1'	'Pseudomonadota'	'Gammaproteobacteria'	'Moraxellales'	'Moraxellaceae'	'Acinetobacter'	'Acinetobacter baumannii'
'GCF_013394285.1'	'Pseudomonadota'	'Gammaproteobacteria'	'Moraxellales'	'Moraxellaceae'	'Acinetobacter'	'Acinetobacter baumannii'
'GCF_023361155.1'	'Pseudomonadota'	'Gammaproteobacteria'	'Moraxellales'	'Moraxellaceae'	'Acinetobacter'	'Acinetobacter baumannii'
'GCF_023361155.1'	'Pseudomonadota'	'Gammaproteobacteria'	'Moraxellales'	'Moraxellaceae'	'Acinetobacter'	'Acinetobacter baumannii'
'GCF_023361155.1'	'Pseudomonadota'	'Gammaproteobacteria'	'Moraxellales'	'Moraxellaceae'	'Acinetobacter'	'Acinetobacter baumannii'
'GCF_014705785.1'	'Pseudomonadota'	'Gammaproteobacteria'	'Moraxellales'	'Moraxellaceae'	'Acinetobacter'	'Acinetobacter baumannii'
'GCF_014705785.1'	'Pseudomonadota'	'Gammaproteobacteria'	'Moraxellales'	'Moraxellaceae'	'Acinetobacter'	'Acinetobacter baumannii'
'GCF_014705785.1'	'Pseudomonadota'	'Gammaproteobacteria'	'Moraxellales'	'Moraxellaceae'	'Acinetobacter'	'Acinetobacter baumannii'
'GCF_016127515.1'	'Pseudomonadota'	'Gammaproteobacteria'	'Moraxellales'	'Moraxellaceae'	'Acinetobacter'	'Acinetobacter baumannii'
'GCF_016127515.1'	'Pseudomonadota'	'Gammaproteobacteria'	'Moraxellales'	'Moraxellaceae'	'Acinetobacter'	'Acinetobacter baumannii'
'GCF_016127515.1'	'Pseudomonadota'	'Gammaproteobacteria'	'Moraxellales'	'Moraxellaceae'	'Acinetobacter'	'Acinetobacter baumannii'
'GCF_017639875.1'	'Pseudomonadota'	'Gammaproteobacteria'	'Moraxellales'	'Moraxellaceae'	'Acinetobacter'	'Acinetobacter baumannii'
'GCF_017639875.1'	'Pseudomonadota'	'Gammaproteobacteria'	'Moraxellales'	'Moraxellaceae'	'Acinetobacter'	'Acinetobacter baumannii'
'GCF_017639875.1'	'Pseudomonadota'	'Gammaproteobacteria'	'Moraxellales'	'Moraxellaceae'	'Acinetobacter'	'Acinetobacter baumannii'
'GCF_014705885.1'	'Pseudomonadota'	'Gammaproteobacteria'	'Moraxellales'	'Moraxellaceae'	'Acinetobacter'	'Acinetobacter baumannii'
'GCF_014705885.1'	'Pseudomonadota'	'Gammaproteobacteria'	'Moraxellales'	'Moraxellaceae'	'Acinetobacter'	'Acinetobacter baumannii'
'GCF_014705885.1'	'Pseudomonadota'	'Gammaproteobacteria'	'Moraxellales'	'Moraxellaceae'	'Acinetobacter'	'Acinetobacter baumannii'
'GCF_022759565.1'	'Pseudomonadota'	'Gammaproteobacteria'	'Moraxellales'	'Moraxellaceae'	'Acinetobacter'	'Acinetobacter baumannii'
'GCF_022759565.1'	'Pseudomonadota'	'Gammaproteobacteria'	'Moraxellales'	'Moraxellaceae'	'Acinetobacter'	'Acinetobacter baumannii'
'GCF_022759565.1'	'Pseudomonadota'	'Gammaproteobacteria'	'Moraxellales'	'Moraxellaceae'	'Acinetobacter'	'Acinetobacter baumannii'
'GCF_017098225.2'	'Pseudomonadota'	'Gammaproteobacteria'	'Moraxellales'	'Moraxellaceae'	'Acinetobacter'	'Acinetobacter baumannii'
'GCF_017098225.2'	'Pseudomonadota'	'Gammaproteobacteria'	'Moraxellales'	'Moraxellaceae'	'Acinetobacter'	'Acinetobacter baumannii'
'GCF_017098225.2'	'Pseudomonadota'	'Gammaproteobacteria'	'Moraxellales'	'Moraxellaceae'	'Acinetobacter'	'Acinetobacter baumannii'
'GCF_023361035.1'	'Pseudomonadota'	'Gammaproteobacteria'	'Moraxellales'	'Moraxellaceae'	'Acinetobacter'	'Acinetobacter baumannii'
'GCF_023361035.1'	'Pseudomonadota'	'Gammaproteobacteria'	'Moraxellales'	'Moraxellaceae'	'Acinetobacter'	'Acinetobacter baumannii'
'GCF_023361035.1'	'Pseudomonadota'	'Gammaproteobacteria'	'Moraxellales'	'Moraxellaceae'	'Acinetobacter'	'Acinetobacter baumannii'
'GCF_022459115.2'	'Pseudomonadota'	'Gammaproteobacteria'	'Moraxellales'	'Moraxellaceae'	'Acinetobacter'	'Acinetobacter baumannii'
'GCF_022459115.2'	'Pseudomonadota'	'Gammaproteobacteria'	'Moraxellales'	'Moraxellaceae'	'Acinetobacter'	'Acinetobacter baumannii'
'GCF_022459115.2'	'Pseudomonadota'	'Gammaproteobacteria'	'Moraxellales'	'Moraxellaceae'	'Acinetobacter'	'Acinetobacter baumannii'
'GCF_019458485.1'	'Pseudomonadota'	'Gammaproteobacteria'	'Moraxellales'	'Moraxellaceae'	'Acinetobacter'	'Acinetobacter baumannii'
'GCF_019458485.1'	'Pseudomonadota'	'Gammaproteobacteria'	'Moraxellales'	'Moraxellaceae'	'Acinetobacter'	'Acinetobacter baumannii'
'GCF_019458485.1'	'Pseudomonadota'	'Gammaproteobacteria'	'Moraxellales'	'Moraxellaceae'	'Acinetobacter'	'Acinetobacter baumannii'
'GCF_017096425.2'	'Pseudomonadota'	'Gammaproteobacteria'	'Moraxellales'	'Moraxellaceae'	'Acinetobacter'	'Acinetobacter baumannii'
'GCF_017096425.2'	'Pseudomonadota'	'Gammaproteobacteria'	'Moraxellales'	'Moraxellaceae'	'Acinetobacter'	'Acinetobacter baumannii'
'GCF_014705825.1'	'Pseudomonadota'	'Gammaproteobacteria'	'Moraxellales'	'Moraxellaceae'	'Acinetobacter'	'Acinetobacter baumannii'
'GCF_014705825.1'	'Pseudomonadota'	'Gammaproteobacteria'	'Moraxellales'	'Moraxellaceae'	'Acinetobacter'	'Acinetobacter baumannii'
'GCF_014705825.1'	'Pseudomonadota'	'Gammaproteobacteria'	'Moraxellales'	'Moraxellaceae'	'Acinetobacter'	'Acinetobacter baumannii'
'GCF_018831125.1'	'Pseudomonadota'	'Gammaproteobacteria'	'Moraxellales'	'Moraxellaceae'	'Acinetobacter'	'Acinetobacter baumannii'
'GCF_018831125.1'	'Pseudomonadota'	'Gammaproteobacteria'	'Moraxellales'	'Moraxellaceae'	'Acinetobacter'	'Acinetobacter baumannii'
'GCF_018831125.1'	'Pseudomonadota'	'Gammaproteobacteria'	'Moraxellales'	'Moraxellaceae'	'Acinetobacter'	'Acinetobacter baumannii'
'GCF_023361275.1'	'Pseudomonadota'	'Gammaproteobacteria'	'Moraxellales'	'Moraxellaceae'	'Acinetobacter'	'Acinetobacter baumannii'
'GCF_023361275.1'	'Pseudomonadota'	'Gammaproteobacteria'	'Moraxellales'	'Moraxellaceae'	'Acinetobacter'	'Acinetobacter baumannii'
'GCF_023361015.1'	'Pseudomonadota'	'Gammaproteobacteria'	'Moraxellales'	'Moraxellaceae'	'Acinetobacter'	'Acinetobacter baumannii'
'GCF_023361015.1'	'Pseudomonadota'	'Gammaproteobacteria'	'Moraxellales'	'Moraxellaceae'	'Acinetobacter'	'Acinetobacter baumannii'
'GCF_023361015.1'	'Pseudomonadota'	'Gammaproteobacteria'	'Moraxellales'	'Moraxellaceae'	'Acinetobacter'	'Acinetobacter baumannii'
'GCF_020810655.1'	'Pseudomonadota'	'Gammaproteobacteria'	'Moraxellales'	'Moraxellaceae'	'Acinetobacter'	'Acinetobacter baumannii'
'GCF_020810655.1'	'Pseudomonadota'	'Gammaproteobacteria'	'Moraxellales'	'Moraxellaceae'	'Acinetobacter'	'Acinetobacter baumannii'
'GCF_020810655.1'	'Pseudomonadota'	'Gammaproteobacteria'	'Moraxellales'	'Moraxellaceae'	'Acinetobacter'	'Acinetobacter baumannii'
'GCF_023361135.1'	'Pseudomonadota'	'Gammaproteobacteria'	'Moraxellales'	'Moraxellaceae'	'Acinetobacter'	'Acinetobacter baumannii'
'GCF_023361135.1'	'Pseudomonadota'	'Gammaproteobacteria'	'Moraxellales'	'Moraxellaceae'	'Acinetobacter'	'Acinetobacter baumannii'
'GCF_023361135.1'	'Pseudomonadota'	'Gammaproteobacteria'	'Moraxellales'	'Moraxellaceae'	'Acinetobacter'	'Acinetobacter baumannii'
'GCF_021729465.1'	'Pseudomonadota'	'Gammaproteobacteria'	'Moraxellales'	'Moraxellaceae'	'Acinetobacter'	'Acinetobacter baumannii'
'GCF_021729465.1'	'Pseudomonadota'	'Gammaproteobacteria'	'Moraxellales'	'Moraxellaceae'	'Acinetobacter'	'Acinetobacter baumannii'
'GCF_021729465.1'	'Pseudomonadota'	'Gammaproteobacteria'	'Moraxellales'	'Moraxellaceae'	'Acinetobacter'	'Acinetobacter baumannii'
'GCF_022459875.1'	'Pseudomonadota'	'Gammaproteobacteria'	'Moraxellales'	'Moraxellaceae'	'Acinetobacter'	'Acinetobacter baumannii'
'GCF_022459875.1'	'Pseudomonadota'	'Gammaproteobacteria'	'Moraxellales'	'Moraxellaceae'	'Acinetobacter'	'Acinetobacter baumannii'
'GCF_022459875.1'	'Pseudomonadota'	'Gammaproteobacteria'	'Moraxellales'	'Moraxellaceae'	'Acinetobacter'	'Acinetobacter baumannii'
'GCF_023361215.1'	'Pseudomonadota'	'Gammaproteobacteria'	'Moraxellales'	'Moraxellaceae'	'Acinetobacter'	'Acinetobacter baumannii'
'GCF_023361215.1'	'Pseudomonadota'	'Gammaproteobacteria'	'Moraxellales'	'Moraxellaceae'	'Acinetobacter'	'Acinetobacter baumannii'
'GCF_023361215.1'	'Pseudomonadota'	'Gammaproteobacteria'	'Moraxellales'	'Moraxellaceae'	'Acinetobacter'	'Acinetobacter baumannii'
'GCF_015910475.1'	'Pseudomonadota'	'Gammaproteobacteria'	'Moraxellales'	'Moraxellaceae'	'Acinetobacter'	'Acinetobacter baumannii'
'GCF_015910475.1'	'Pseudomonadota'	'Gammaproteobacteria'	'Moraxellales'	'Moraxellaceae'	'Acinetobacter'	'Acinetobacter baumannii'
'GCF_015910475.1'	'Pseudomonadota'	'Gammaproteobacteria'	'Moraxellales'	'Moraxellaceae'	'Acinetobacter'	'Acinetobacter baumannii'
'GCF_022459755.2'	'Pseudomonadota'	'Gammaproteobacteria'	'Moraxellales'	'Moraxellaceae'	'Acinetobacter'	'Acinetobacter baumannii'
'GCF_022459755.2'	'Pseudomonadota'	'Gammaproteobacteria'	'Moraxellales'	'Moraxellaceae'	'Acinetobacter'	'Acinetobacter baumannii'
'GCF_022459755.2'	'Pseudomonadota'	'Gammaproteobacteria'	'Moraxellales'	'Moraxellaceae'	'Acinetobacter'	'Acinetobacter baumannii'
'GCF_023361115.1'	'Pseudomonadota'	'Gammaproteobacteria'	'Moraxellales'	'Moraxellaceae'	'Acinetobacter'	'Acinetobacter baumannii'
'GCF_023361115.1'	'Pseudomonadota'	'Gammaproteobacteria'	'Moraxellales'	'Moraxellaceae'	'Acinetobacter'	'Acinetobacter baumannii'
'GCF_023361115.1'	'Pseudomonadota'	'Gammaproteobacteria'	'Moraxellales'	'Moraxellaceae'	'Acinetobacter'	'Acinetobacter baumannii'
'GCF_022459095.1'	'Pseudomonadota'	'Gammaproteobacteria'	'Moraxellales'	'Moraxellaceae'	'Acinetobacter'	'Acinetobacter baumannii'
'GCF_022459095.1'	'Pseudomonadota'	'Gammaproteobacteria'	'Moraxellales'	'Moraxellaceae'	'Acinetobacter'	'Acinetobacter baumannii'
'GCF_022459095.1'	'Pseudomonadota'	'Gammaproteobacteria'	'Moraxellales'	'Moraxellaceae'	'Acinetobacter'	'Acinetobacter baumannii'
'GCF_022467805.1'	'Pseudomonadota'	'Gammaproteobacteria'	'Moraxellales'	'Moraxellaceae'	'Acinetobacter'	'Acinetobacter baumannii'
'GCF_022467805.1'	'Pseudomonadota'	'Gammaproteobacteria'	'Moraxellales'	'Moraxellaceae'	'Acinetobacter'	'Acinetobacter baumannii'
'GCF_016865465.1'	'Pseudomonadota'	'Gammaproteobacteria'	'Moraxellales'	'Moraxellaceae'	'Acinetobacter'	'Acinetobacter baumannii'
'GCF_016865465.1'	'Pseudomonadota'	'Gammaproteobacteria'	'Moraxellales'	'Moraxellaceae'	'Acinetobacter'	'Acinetobacter baumannii'
'GCF_016865465.1'	'Pseudomonadota'	'Gammaproteobacteria'	'Moraxellales'	'Moraxellaceae'	'Acinetobacter'	'Acinetobacter baumannii'
'GCF_019356075.1'	'Pseudomonadota'	'Gammaproteobacteria'	'Moraxellales'	'Moraxellaceae'	'Acinetobacter'	'Acinetobacter baumannii'
'GCF_019356075.1'	'Pseudomonadota'	'Gammaproteobacteria'	'Moraxellales'	'Moraxellaceae'	'Acinetobacter'	'Acinetobacter baumannii'
'GCF_019356075.1'	'Pseudomonadota'	'Gammaproteobacteria'	'Moraxellales'	'Moraxellaceae'	'Acinetobacter'	'Acinetobacter baumannii'
'GCF_022467735.1'	'Pseudomonadota'	'Gammaproteobacteria'	'Moraxellales'	'Moraxellaceae'	'Acinetobacter'	'Acinetobacter baumannii'
'GCF_022467735.1'	'Pseudomonadota'	'Gammaproteobacteria'	'Moraxellales'	'Moraxellaceae'	'Acinetobacter'	'Acinetobacter baumannii'
'GCF_022467735.1'	'Pseudomonadota'	'Gammaproteobacteria'	'Moraxellales'	'Moraxellaceae'	'Acinetobacter'	'Acinetobacter baumannii'
'GCF_020132105.1'	'Pseudomonadota'	'Gammaproteobacteria'	'Moraxellales'	'Moraxellaceae'	'Acinetobacter'	'Acinetobacter baumannii'
'GCF_020132105.1'	'Pseudomonadota'	'Gammaproteobacteria'	'Moraxellales'	'Moraxellaceae'	'Acinetobacter'	'Acinetobacter baumannii'
'GCF_020132105.1'	'Pseudomonadota'	'Gammaproteobacteria'	'Moraxellales'	'Moraxellaceae'	'Acinetobacter'	'Acinetobacter baumannii'
'GCF_014672775.1'	'Pseudomonadota'	'Gammaproteobacteria'	'Moraxellales'	'Moraxellaceae'	'Acinetobacter'	'Acinetobacter baumannii'
'GCF_014672775.1'	'Pseudomonadota'	'Gammaproteobacteria'	'Moraxellales'	'Moraxellaceae'	'Acinetobacter'	'Acinetobacter baumannii'
'GCF_014672775.1'	'Pseudomonadota'	'Gammaproteobacteria'	'Moraxellales'	'Moraxellaceae'	'Acinetobacter'	'Acinetobacter baumannii'
'GCF_016350105.1'	'Pseudomonadota'	'Gammaproteobacteria'	'Moraxellales'	'Moraxellaceae'	'Acinetobacter'	'Acinetobacter baumannii'
'GCF_016350105.1'	'Pseudomonadota'	'Gammaproteobacteria'	'Moraxellales'	'Moraxellaceae'	'Acinetobacter'	'Acinetobacter baumannii'
'GCF_016350105.1'	'Pseudomonadota'	'Gammaproteobacteria'	'Moraxellales'	'Moraxellaceae'	'Acinetobacter'	'Acinetobacter baumannii'
'GCF_012935025.1'	'Pseudomonadota'	'Gammaproteobacteria'	'Moraxellales'	'Moraxellaceae'	'Acinetobacter'	'Acinetobacter baumannii'
'GCF_012935025.1'	'Pseudomonadota'	'Gammaproteobacteria'	'Moraxellales'	'Moraxellaceae'	'Acinetobacter'	'Acinetobacter baumannii'
'GCF_012935025.1'	'Pseudomonadota'	'Gammaproteobacteria'	'Moraxellales'	'Moraxellaceae'	'Acinetobacter'	'Acinetobacter baumannii'
'GCF_012974845.1'	'Pseudomonadota'	'Gammaproteobacteria'	'Moraxellales'	'Moraxellaceae'	'Acinetobacter'	'Acinetobacter baumannii'
'GCF_012974845.1'	'Pseudomonadota'	'Gammaproteobacteria'	'Moraxellales'	'Moraxellaceae'	'Acinetobacter'	'Acinetobacter baumannii'
'GCF_012974845.1'	'Pseudomonadota'	'Gammaproteobacteria'	'Moraxellales'	'Moraxellaceae'	'Acinetobacter'	'Acinetobacter baumannii'
'GCF_022469075.1'	'Pseudomonadota'	'Gammaproteobacteria'	'Moraxellales'	'Moraxellaceae'	'Acinetobacter'	'Acinetobacter baumannii'
'GCF_022469075.1'	'Pseudomonadota'	'Gammaproteobacteria'	'Moraxellales'	'Moraxellaceae'	'Acinetobacter'	'Acinetobacter baumannii'
'GCF_022469075.1'	'Pseudomonadota'	'Gammaproteobacteria'	'Moraxellales'	'Moraxellaceae'	'Acinetobacter'	'Acinetobacter baumannii'
'GCF_016350085.1'	'Pseudomonadota'	'Gammaproteobacteria'	'Moraxellales'	'Moraxellaceae'	'Acinetobacter'	'Acinetobacter baumannii'
'GCF_016350085.1'	'Pseudomonadota'	'Gammaproteobacteria'	'Moraxellales'	'Moraxellaceae'	'Acinetobacter'	'Acinetobacter baumannii'
'GCF_016350085.1'	'Pseudomonadota'	'Gammaproteobacteria'	'Moraxellales'	'Moraxellaceae'	'Acinetobacter'	'Acinetobacter baumannii'
'GCF_022467435.1'	'Pseudomonadota'	'Gammaproteobacteria'	'Moraxellales'	'Moraxellaceae'	'Acinetobacter'	'Acinetobacter baumannii'
'GCF_022467435.1'	'Pseudomonadota'	'Gammaproteobacteria'	'Moraxellales'	'Moraxellaceae'	'Acinetobacter'	'Acinetobacter baumannii'
'GCF_022467435.1'	'Pseudomonadota'	'Gammaproteobacteria'	'Moraxellales'	'Moraxellaceae'	'Acinetobacter'	'Acinetobacter baumannii'
'GCF_022466815.1'	'Pseudomonadota'	'Gammaproteobacteria'	'Moraxellales'	'Moraxellaceae'	'Acinetobacter'	'Acinetobacter baumannii'
'GCF_022466815.1'	'Pseudomonadota'	'Gammaproteobacteria'	'Moraxellales'	'Moraxellaceae'	'Acinetobacter'	'Acinetobacter baumannii'
'GCF_022466815.1'	'Pseudomonadota'	'Gammaproteobacteria'	'Moraxellales'	'Moraxellaceae'	'Acinetobacter'	'Acinetobacter baumannii'
'GCF_022459175.1'	'Pseudomonadota'	'Gammaproteobacteria'	'Moraxellales'	'Moraxellaceae'	'Acinetobacter'	'Acinetobacter baumannii'
'GCF_022459175.1'	'Pseudomonadota'	'Gammaproteobacteria'	'Moraxellales'	'Moraxellaceae'	'Acinetobacter'	'Acinetobacter baumannii'
'GCF_022459175.1'	'Pseudomonadota'	'Gammaproteobacteria'	'Moraxellales'	'Moraxellaceae'	'Acinetobacter'	'Acinetobacter baumannii'
'GCF_022460575.1'	'Pseudomonadota'	'Gammaproteobacteria'	'Moraxellales'	'Moraxellaceae'	'Acinetobacter'	'Acinetobacter baumannii'
'GCF_022460575.1'	'Pseudomonadota'	'Gammaproteobacteria'	'Moraxellales'	'Moraxellaceae'	'Acinetobacter'	'Acinetobacter baumannii'
'GCF_022460575.1'	'Pseudomonadota'	'Gammaproteobacteria'	'Moraxellales'	'Moraxellaceae'	'Acinetobacter'	'Acinetobacter baumannii'
'GCF_022467975.1'	'Pseudomonadota'	'Gammaproteobacteria'	'Moraxellales'	'Moraxellaceae'	'Acinetobacter'	'Acinetobacter baumannii'
'GCF_022467975.1'	'Pseudomonadota'	'Gammaproteobacteria'	'Moraxellales'	'Moraxellaceae'	'Acinetobacter'	'Acinetobacter baumannii'
'GCF_022467975.1'	'Pseudomonadota'	'Gammaproteobacteria'	'Moraxellales'	'Moraxellaceae'	'Acinetobacter'	'Acinetobacter baumannii'
'GCF_016350065.1'	'Pseudomonadota'	'Gammaproteobacteria'	'Moraxellales'	'Moraxellaceae'	'Acinetobacter'	'Acinetobacter baumannii'
'GCF_016350065.1'	'Pseudomonadota'	'Gammaproteobacteria'	'Moraxellales'	'Moraxellaceae'	'Acinetobacter'	'Acinetobacter baumannii'
'GCF_016350065.1'	'Pseudomonadota'	'Gammaproteobacteria'	'Moraxellales'	'Moraxellaceae'	'Acinetobacter'	'Acinetobacter baumannii'
'GCF_022460015.1'	'Pseudomonadota'	'Gammaproteobacteria'	'Moraxellales'	'Moraxellaceae'	'Acinetobacter'	'Acinetobacter baumannii'
'GCF_022460015.1'	'Pseudomonadota'	'Gammaproteobacteria'	'Moraxellales'	'Moraxellaceae'	'Acinetobacter'	'Acinetobacter baumannii'
'GCF_022460015.1'	'Pseudomonadota'	'Gammaproteobacteria'	'Moraxellales'	'Moraxellaceae'	'Acinetobacter'	'Acinetobacter baumannii'
'GCF_016350005.1'	'Pseudomonadota'	'Gammaproteobacteria'	'Moraxellales'	'Moraxellaceae'	'Acinetobacter'	'Acinetobacter baumannii'
'GCF_016350005.1'	'Pseudomonadota'	'Gammaproteobacteria'	'Moraxellales'	'Moraxellaceae'	'Acinetobacter'	'Acinetobacter baumannii'
'GCF_016350005.1'	'Pseudomonadota'	'Gammaproteobacteria'	'Moraxellales'	'Moraxellaceae'	'Acinetobacter'	'Acinetobacter baumannii'
'GCF_020520405.1'	'Pseudomonadota'	'Gammaproteobacteria'	'Moraxellales'	'Moraxellaceae'	'Acinetobacter'	'Acinetobacter baumannii'
'GCF_020520405.1'	'Pseudomonadota'	'Gammaproteobacteria'	'Moraxellales'	'Moraxellaceae'	'Acinetobacter'	'Acinetobacter baumannii'
'GCF_020520405.1'	'Pseudomonadota'	'Gammaproteobacteria'	'Moraxellales'	'Moraxellaceae'	'Acinetobacter'	'Acinetobacter baumannii'
'GCF_020520385.1'	'Pseudomonadota'	'Gammaproteobacteria'	'Moraxellales'	'Moraxellaceae'	'Acinetobacter'	'Acinetobacter baumannii'
'GCF_020520385.1'	'Pseudomonadota'	'Gammaproteobacteria'	'Moraxellales'	'Moraxellaceae'	'Acinetobacter'	'Acinetobacter baumannii'
'GCF_020520385.1'	'Pseudomonadota'	'Gammaproteobacteria'	'Moraxellales'	'Moraxellaceae'	'Acinetobacter'	'Acinetobacter baumannii'
'GCF_020520325.1'	'Pseudomonadota'	'Gammaproteobacteria'	'Moraxellales'	'Moraxellaceae'	'Acinetobacter'	'Acinetobacter baumannii'
'GCF_020520325.1'	'Pseudomonadota'	'Gammaproteobacteria'	'Moraxellales'	'Moraxellaceae'	'Acinetobacter'	'Acinetobacter baumannii'
'GCF_020520325.1'	'Pseudomonadota'	'Gammaproteobacteria'	'Moraxellales'	'Moraxellaceae'	'Acinetobacter'	'Acinetobacter baumannii'
'GCF_020520365.1'	'Pseudomonadota'	'Gammaproteobacteria'	'Moraxellales'	'Moraxellaceae'	'Acinetobacter'	'Acinetobacter baumannii'
'GCF_020520365.1'	'Pseudomonadota'	'Gammaproteobacteria'	'Moraxellales'	'Moraxellaceae'	'Acinetobacter'	'Acinetobacter baumannii'
'GCF_020520365.1'	'Pseudomonadota'	'Gammaproteobacteria'	'Moraxellales'	'Moraxellaceae'	'Acinetobacter'	'Acinetobacter baumannii'
'GCF_020520345.1'	'Pseudomonadota'	'Gammaproteobacteria'	'Moraxellales'	'Moraxellaceae'	'Acinetobacter'	'Acinetobacter baumannii'
'GCF_020520345.1'	'Pseudomonadota'	'Gammaproteobacteria'	'Moraxellales'	'Moraxellaceae'	'Acinetobacter'	'Acinetobacter baumannii'
'GCF_020520345.1'	'Pseudomonadota'	'Gammaproteobacteria'	'Moraxellales'	'Moraxellaceae'	'Acinetobacter'	'Acinetobacter baumannii'
'GCF_014705805.1'	'Pseudomonadota'	'Gammaproteobacteria'	'Moraxellales'	'Moraxellaceae'	'Acinetobacter'	'Acinetobacter baumannii'
'GCF_014705805.1'	'Pseudomonadota'	'Gammaproteobacteria'	'Moraxellales'	'Moraxellaceae'	'Acinetobacter'	'Acinetobacter baumannii'
'GCF_014705805.1'	'Pseudomonadota'	'Gammaproteobacteria'	'Moraxellales'	'Moraxellaceae'	'Acinetobacter'	'Acinetobacter baumannii'
'GCF_014705845.1'	'Pseudomonadota'	'Gammaproteobacteria'	'Moraxellales'	'Moraxellaceae'	'Acinetobacter'	'Acinetobacter baumannii'
'GCF_014705845.1'	'Pseudomonadota'	'Gammaproteobacteria'	'Moraxellales'	'Moraxellaceae'	'Acinetobacter'	'Acinetobacter baumannii'
'GCF_014705845.1'	'Pseudomonadota'	'Gammaproteobacteria'	'Moraxellales'	'Moraxellaceae'	'Acinetobacter'	'Acinetobacter baumannii'
'GCF_012934965.1'	'Pseudomonadota'	'Gammaproteobacteria'	'Moraxellales'	'Moraxellaceae'	'Acinetobacter'	'Acinetobacter baumannii'
'GCF_012934965.1'	'Pseudomonadota'	'Gammaproteobacteria'	'Moraxellales'	'Moraxellaceae'	'Acinetobacter'	'Acinetobacter baumannii'
'GCF_012934965.1'	'Pseudomonadota'	'Gammaproteobacteria'	'Moraxellales'	'Moraxellaceae'	'Acinetobacter'	'Acinetobacter baumannii'
'GCF_022466975.1'	'Pseudomonadota'	'Gammaproteobacteria'	'Moraxellales'	'Moraxellaceae'	'Acinetobacter'	'Acinetobacter baumannii'
'GCF_022466975.1'	'Pseudomonadota'	'Gammaproteobacteria'	'Moraxellales'	'Moraxellaceae'	'Acinetobacter'	'Acinetobacter baumannii'
'GCF_022466975.1'	'Pseudomonadota'	'Gammaproteobacteria'	'Moraxellales'	'Moraxellaceae'	'Acinetobacter'	'Acinetobacter baumannii'
'GCF_016903135.1'	'Pseudomonadota'	'Gammaproteobacteria'	'Moraxellales'	'Moraxellaceae'	'Acinetobacter'	'Acinetobacter baumannii'
'GCF_016903135.1'	'Pseudomonadota'	'Gammaproteobacteria'	'Moraxellales'	'Moraxellaceae'	'Acinetobacter'	'Acinetobacter baumannii'
'GCF_016903135.1'	'Pseudomonadota'	'Gammaproteobacteria'	'Moraxellales'	'Moraxellaceae'	'Acinetobacter'	'Acinetobacter baumannii'
'GCF_022107375.1'	'Pseudomonadota'	'Gammaproteobacteria'	'Moraxellales'	'Moraxellaceae'	'Acinetobacter'	'Acinetobacter baumannii'
'GCF_022107375.1'	'Pseudomonadota'	'Gammaproteobacteria'	'Moraxellales'	'Moraxellaceae'	'Acinetobacter'	'Acinetobacter baumannii'
'GCF_022459595.1'	'Pseudomonadota'	'Gammaproteobacteria'	'Moraxellales'	'Moraxellaceae'	'Acinetobacter'	'Acinetobacter baumannii'
'GCF_022459595.1'	'Pseudomonadota'	'Gammaproteobacteria'	'Moraxellales'	'Moraxellaceae'	'Acinetobacter'	'Acinetobacter baumannii'
'GCF_022459595.1'	'Pseudomonadota'	'Gammaproteobacteria'	'Moraxellales'	'Moraxellaceae'	'Acinetobacter'	'Acinetobacter baumannii'
'GCF_022459295.1'	'Pseudomonadota'	'Gammaproteobacteria'	'Moraxellales'	'Moraxellaceae'	'Acinetobacter'	'Acinetobacter baumannii'
'GCF_022459295.1'	'Pseudomonadota'	'Gammaproteobacteria'	'Moraxellales'	'Moraxellaceae'	'Acinetobacter'	'Acinetobacter baumannii'
'GCF_022459295.1'	'Pseudomonadota'	'Gammaproteobacteria'	'Moraxellales'	'Moraxellaceae'	'Acinetobacter'	'Acinetobacter baumannii'
'GCF_018454385.1'	'Pseudomonadota'	'Gammaproteobacteria'	'Moraxellales'	'Moraxellaceae'	'Acinetobacter'	'Acinetobacter baumannii'
'GCF_018454385.1'	'Pseudomonadota'	'Gammaproteobacteria'	'Moraxellales'	'Moraxellaceae'	'Acinetobacter'	'Acinetobacter baumannii'
'GCF_018454385.1'	'Pseudomonadota'	'Gammaproteobacteria'	'Moraxellales'	'Moraxellaceae'	'Acinetobacter'	'Acinetobacter baumannii'
'GCF_019903155.1'	'Pseudomonadota'	'Gammaproteobacteria'	'Moraxellales'	'Moraxellaceae'	'Acinetobacter'	'Acinetobacter baumannii'
'GCF_019903155.1'	'Pseudomonadota'	'Gammaproteobacteria'	'Moraxellales'	'Moraxellaceae'	'Acinetobacter'	'Acinetobacter baumannii'
'GCF_019903155.1'	'Pseudomonadota'	'Gammaproteobacteria'	'Moraxellales'	'Moraxellaceae'	'Acinetobacter'	'Acinetobacter baumannii'
'GCF_017096325.2'	'Pseudomonadota'	'Gammaproteobacteria'	'Moraxellales'	'Moraxellaceae'	'Acinetobacter'	'Acinetobacter baumannii'
'GCF_017096325.2'	'Pseudomonadota'	'Gammaproteobacteria'	'Moraxellales'	'Moraxellaceae'	'Acinetobacter'	'Acinetobacter baumannii'
'GCF_017096325.2'	'Pseudomonadota'	'Gammaproteobacteria'	'Moraxellales'	'Moraxellaceae'	'Acinetobacter'	'Acinetobacter baumannii'
'GCF_012935065.1'	'Pseudomonadota'	'Gammaproteobacteria'	'Moraxellales'	'Moraxellaceae'	'Acinetobacter'	'Acinetobacter baumannii'
'GCF_012935065.1'	'Pseudomonadota'	'Gammaproteobacteria'	'Moraxellales'	'Moraxellaceae'	'Acinetobacter'	'Acinetobacter baumannii'
'GCF_012935065.1'	'Pseudomonadota'	'Gammaproteobacteria'	'Moraxellales'	'Moraxellaceae'	'Acinetobacter'	'Acinetobacter baumannii'
'GCF_018604365.1'	'Pseudomonadota'	'Gammaproteobacteria'	'Moraxellales'	'Moraxellaceae'	'Acinetobacter'	'Acinetobacter baumannii'
'GCF_018604365.1'	'Pseudomonadota'	'Gammaproteobacteria'	'Moraxellales'	'Moraxellaceae'	'Acinetobacter'	'Acinetobacter baumannii'
'GCF_018604365.1'	'Pseudomonadota'	'Gammaproteobacteria'	'Moraxellales'	'Moraxellaceae'	'Acinetobacter'	'Acinetobacter baumannii'
'GCF_022468355.1'	'Pseudomonadota'	'Gammaproteobacteria'	'Moraxellales'	'Moraxellaceae'	'Acinetobacter'	'Acinetobacter baumannii'
'GCF_022468355.1'	'Pseudomonadota'	'Gammaproteobacteria'	'Moraxellales'	'Moraxellaceae'	'Acinetobacter'	'Acinetobacter baumannii'
'GCF_022468355.1'	'Pseudomonadota'	'Gammaproteobacteria'	'Moraxellales'	'Moraxellaceae'	'Acinetobacter'	'Acinetobacter baumannii'
'GCF_022468795.1'	'Pseudomonadota'	'Gammaproteobacteria'	'Moraxellales'	'Moraxellaceae'	'Acinetobacter'	'Acinetobacter baumannii'
'GCF_022468795.1'	'Pseudomonadota'	'Gammaproteobacteria'	'Moraxellales'	'Moraxellaceae'	'Acinetobacter'	'Acinetobacter baumannii'
'GCF_022460155.2'	'Pseudomonadota'	'Gammaproteobacteria'	'Moraxellales'	'Moraxellaceae'	'Acinetobacter'	'Acinetobacter baumannii'
'GCF_022460155.2'	'Pseudomonadota'	'Gammaproteobacteria'	'Moraxellales'	'Moraxellaceae'	'Acinetobacter'	'Acinetobacter baumannii'
'GCF_022460155.2'	'Pseudomonadota'	'Gammaproteobacteria'	'Moraxellales'	'Moraxellaceae'	'Acinetobacter'	'Acinetobacter baumannii'
'GCF_022460435.2'	'Pseudomonadota'	'Gammaproteobacteria'	'Moraxellales'	'Moraxellaceae'	'Acinetobacter'	'Acinetobacter baumannii'
'GCF_022460435.2'	'Pseudomonadota'	'Gammaproteobacteria'	'Moraxellales'	'Moraxellaceae'	'Acinetobacter'	'Acinetobacter baumannii'
'GCF_022460435.2'	'Pseudomonadota'	'Gammaproteobacteria'	'Moraxellales'	'Moraxellaceae'	'Acinetobacter'	'Acinetobacter baumannii'
'GCF_017096365.2'	'Pseudomonadota'	'Gammaproteobacteria'	'Moraxellales'	'Moraxellaceae'	'Acinetobacter'	'Acinetobacter baumannii'
'GCF_017096365.2'	'Pseudomonadota'	'Gammaproteobacteria'	'Moraxellales'	'Moraxellaceae'	'Acinetobacter'	'Acinetobacter baumannii'
'GCF_017096365.2'	'Pseudomonadota'	'Gammaproteobacteria'	'Moraxellales'	'Moraxellaceae'	'Acinetobacter'	'Acinetobacter baumannii'
'GCF_012935085.1'	'Pseudomonadota'	'Gammaproteobacteria'	'Moraxellales'	'Moraxellaceae'	'Acinetobacter'	'Acinetobacter baumannii'
'GCF_012935085.1'	'Pseudomonadota'	'Gammaproteobacteria'	'Moraxellales'	'Moraxellaceae'	'Acinetobacter'	'Acinetobacter baumannii'
'GCF_012935085.1'	'Pseudomonadota'	'Gammaproteobacteria'	'Moraxellales'	'Moraxellaceae'	'Acinetobacter'	'Acinetobacter baumannii'
'GCF_012934925.1'	'Pseudomonadota'	'Gammaproteobacteria'	'Moraxellales'	'Moraxellaceae'	'Acinetobacter'	'Acinetobacter baumannii'
'GCF_012934925.1'	'Pseudomonadota'	'Gammaproteobacteria'	'Moraxellales'	'Moraxellaceae'	'Acinetobacter'	'Acinetobacter baumannii'
'GCF_012934925.1'	'Pseudomonadota'	'Gammaproteobacteria'	'Moraxellales'	'Moraxellaceae'	'Acinetobacter'	'Acinetobacter baumannii'
'GCF_021730415.1'	'Pseudomonadota'	'Gammaproteobacteria'	'Moraxellales'	'Moraxellaceae'	'Acinetobacter'	'Acinetobacter baumannii'
'GCF_021730415.1'	'Pseudomonadota'	'Gammaproteobacteria'	'Moraxellales'	'Moraxellaceae'	'Acinetobacter'	'Acinetobacter baumannii'
'GCF_021730415.1'	'Pseudomonadota'	'Gammaproteobacteria'	'Moraxellales'	'Moraxellaceae'	'Acinetobacter'	'Acinetobacter baumannii'
'GCF_012934985.1'	'Pseudomonadota'	'Gammaproteobacteria'	'Moraxellales'	'Moraxellaceae'	'Acinetobacter'	'Acinetobacter baumannii'
'GCF_012934985.1'	'Pseudomonadota'	'Gammaproteobacteria'	'Moraxellales'	'Moraxellaceae'	'Acinetobacter'	'Acinetobacter baumannii'
'GCF_012934985.1'	'Pseudomonadota'	'Gammaproteobacteria'	'Moraxellales'	'Moraxellaceae'	'Acinetobacter'	'Acinetobacter baumannii'
'GCF_014159355.1'	'Pseudomonadota'	'Gammaproteobacteria'	'Moraxellales'	'Moraxellaceae'	'Acinetobacter'	'Acinetobacter baumannii'
'GCF_014159355.1'	'Pseudomonadota'	'Gammaproteobacteria'	'Moraxellales'	'Moraxellaceae'	'Acinetobacter'	'Acinetobacter baumannii'
'GCF_023361095.1'	'Pseudomonadota'	'Gammaproteobacteria'	'Moraxellales'	'Moraxellaceae'	'Acinetobacter'	'Acinetobacter baumannii'
'GCF_023361095.1'	'Pseudomonadota'	'Gammaproteobacteria'	'Moraxellales'	'Moraxellaceae'	'Acinetobacter'	'Acinetobacter baumannii'
'GCF_023361095.1'	'Pseudomonadota'	'Gammaproteobacteria'	'Moraxellales'	'Moraxellaceae'	'Acinetobacter'	'Acinetobacter baumannii'
'GCF_023054035.1'	'Pseudomonadota'	'Gammaproteobacteria'	'Moraxellales'	'Moraxellaceae'	'Acinetobacter'	'Acinetobacter baumannii'
'GCF_023054035.1'	'Pseudomonadota'	'Gammaproteobacteria'	'Moraxellales'	'Moraxellaceae'	'Acinetobacter'	'Acinetobacter baumannii'
'GCF_023054035.1'	'Pseudomonadota'	'Gammaproteobacteria'	'Moraxellales'	'Moraxellaceae'	'Acinetobacter'	'Acinetobacter baumannii'
'GCF_017098245.2'	'Pseudomonadota'	'Gammaproteobacteria'	'Moraxellales'	'Moraxellaceae'	'Acinetobacter'	'Acinetobacter baumannii'
'GCF_017098245.2'	'Pseudomonadota'	'Gammaproteobacteria'	'Moraxellales'	'Moraxellaceae'	'Acinetobacter'	'Acinetobacter baumannii'
'GCF_017098245.2'	'Pseudomonadota'	'Gammaproteobacteria'	'Moraxellales'	'Moraxellaceae'	'Acinetobacter'	'Acinetobacter baumannii'
'GCF_017098265.1'	'Pseudomonadota'	'Gammaproteobacteria'	'Moraxellales'	'Moraxellaceae'	'Acinetobacter'	'Acinetobacter baumannii'
'GCF_017098265.1'	'Pseudomonadota'	'Gammaproteobacteria'	'Moraxellales'	'Moraxellaceae'	'Acinetobacter'	'Acinetobacter baumannii'
'GCF_017098265.1'	'Pseudomonadota'	'Gammaproteobacteria'	'Moraxellales'	'Moraxellaceae'	'Acinetobacter'	'Acinetobacter baumannii'
'GCF_014705865.1'	'Pseudomonadota'	'Gammaproteobacteria'	'Moraxellales'	'Moraxellaceae'	'Acinetobacter'	'Acinetobacter baumannii'
'GCF_014705865.1'	'Pseudomonadota'	'Gammaproteobacteria'	'Moraxellales'	'Moraxellaceae'	'Acinetobacter'	'Acinetobacter baumannii'
'GCF_014705865.1'	'Pseudomonadota'	'Gammaproteobacteria'	'Moraxellales'	'Moraxellaceae'	'Acinetobacter'	'Acinetobacter baumannii'
'GCF_022468075.1'	'Pseudomonadota'	'Gammaproteobacteria'	'Moraxellales'	'Moraxellaceae'	'Acinetobacter'	'Acinetobacter baumannii'
'GCF_022468075.1'	'Pseudomonadota'	'Gammaproteobacteria'	'Moraxellales'	'Moraxellaceae'	'Acinetobacter'	'Acinetobacter baumannii'
'GCF_022468075.1'	'Pseudomonadota'	'Gammaproteobacteria'	'Moraxellales'	'Moraxellaceae'	'Acinetobacter'	'Acinetobacter baumannii'
'GCF_020906565.1'	'Pseudomonadota'	'Gammaproteobacteria'	'Moraxellales'	'Moraxellaceae'	'Acinetobacter'	'Acinetobacter baumannii'
'GCF_020906565.1'	'Pseudomonadota'	'Gammaproteobacteria'	'Moraxellales'	'Moraxellaceae'	'Acinetobacter'	'Acinetobacter baumannii'
'GCF_020906565.1'	'Pseudomonadota'	'Gammaproteobacteria'	'Moraxellales'	'Moraxellaceae'	'Acinetobacter'	'Acinetobacter baumannii'
'GCF_018831485.1'	'Pseudomonadota'	'Gammaproteobacteria'	'Moraxellales'	'Moraxellaceae'	'Acinetobacter'	'Acinetobacter baumannii'
'GCF_018831485.1'	'Pseudomonadota'	'Gammaproteobacteria'	'Moraxellales'	'Moraxellaceae'	'Acinetobacter'	'Acinetobacter baumannii'
'GCF_018831485.1'	'Pseudomonadota'	'Gammaproteobacteria'	'Moraxellales'	'Moraxellaceae'	'Acinetobacter'	'Acinetobacter baumannii'
'GCF_022916555.1'	'Pseudomonadota'	'Gammaproteobacteria'	'Moraxellales'	'Moraxellaceae'	'Acinetobacter'	'Acinetobacter baumannii'
'GCF_022916555.1'	'Pseudomonadota'	'Gammaproteobacteria'	'Moraxellales'	'Moraxellaceae'	'Acinetobacter'	'Acinetobacter baumannii'
'GCF_022916555.1'	'Pseudomonadota'	'Gammaproteobacteria'	'Moraxellales'	'Moraxellaceae'	'Acinetobacter'	'Acinetobacter baumannii'
'GCF_022467905.1'	'Pseudomonadota'	'Gammaproteobacteria'	'Moraxellales'	'Moraxellaceae'	'Acinetobacter'	'Acinetobacter baumannii'
'GCF_022467905.1'	'Pseudomonadota'	'Gammaproteobacteria'	'Moraxellales'	'Moraxellaceae'	'Acinetobacter'	'Acinetobacter baumannii'
'GCF_013377175.1'	'Pseudomonadota'	'Gammaproteobacteria'	'Moraxellales'	'Moraxellaceae'	'Acinetobacter'	'Acinetobacter baumannii'
'GCF_013377175.1'	'Pseudomonadota'	'Gammaproteobacteria'	'Moraxellales'	'Moraxellaceae'	'Acinetobacter'	'Acinetobacter baumannii'
'GCF_013377175.1'	'Pseudomonadota'	'Gammaproteobacteria'	'Moraxellales'	'Moraxellaceae'	'Acinetobacter'	'Acinetobacter baumannii'
'GCF_020912005.1'	'Pseudomonadota'	'Gammaproteobacteria'	'Moraxellales'	'Moraxellaceae'	'Acinetobacter'	'Acinetobacter baumannii'
'GCF_020912005.1'	'Pseudomonadota'	'Gammaproteobacteria'	'Moraxellales'	'Moraxellaceae'	'Acinetobacter'	'Acinetobacter baumannii'
'GCF_020912005.1'	'Pseudomonadota'	'Gammaproteobacteria'	'Moraxellales'	'Moraxellaceae'	'Acinetobacter'	'Acinetobacter baumannii'
'GCF_012935045.1'	'Pseudomonadota'	'Gammaproteobacteria'	'Moraxellales'	'Moraxellaceae'	'Acinetobacter'	'Acinetobacter baumannii'
'GCF_012935045.1'	'Pseudomonadota'	'Gammaproteobacteria'	'Moraxellales'	'Moraxellaceae'	'Acinetobacter'	'Acinetobacter baumannii'
'GCF_012935045.1'	'Pseudomonadota'	'Gammaproteobacteria'	'Moraxellales'	'Moraxellaceae'	'Acinetobacter'	'Acinetobacter baumannii'
'GCF_013394265.1'	'Pseudomonadota'	'Gammaproteobacteria'	'Moraxellales'	'Moraxellaceae'	'Acinetobacter'	'Acinetobacter baumannii'
'GCF_013394265.1'	'Pseudomonadota'	'Gammaproteobacteria'	'Moraxellales'	'Moraxellaceae'	'Acinetobacter'	'Acinetobacter baumannii'
'GCF_013394265.1'	'Pseudomonadota'	'Gammaproteobacteria'	'Moraxellales'	'Moraxellaceae'	'Acinetobacter'	'Acinetobacter baumannii'
'GCF_022468565.1'	'Pseudomonadota'	'Gammaproteobacteria'	'Moraxellales'	'Moraxellaceae'	'Acinetobacter'	'Acinetobacter baumannii'
'GCF_022468565.1'	'Pseudomonadota'	'Gammaproteobacteria'	'Moraxellales'	'Moraxellaceae'	'Acinetobacter'	'Acinetobacter baumannii'
'GCF_022468565.1'	'Pseudomonadota'	'Gammaproteobacteria'	'Moraxellales'	'Moraxellaceae'	'Acinetobacter'	'Acinetobacter baumannii'
'GCF_022468455.1'	'Pseudomonadota'	'Gammaproteobacteria'	'Moraxellales'	'Moraxellaceae'	'Acinetobacter'	'Acinetobacter baumannii'
'GCF_022468455.1'	'Pseudomonadota'	'Gammaproteobacteria'	'Moraxellales'	'Moraxellaceae'	'Acinetobacter'	'Acinetobacter baumannii'
'GCF_022468455.1'	'Pseudomonadota'	'Gammaproteobacteria'	'Moraxellales'	'Moraxellaceae'	'Acinetobacter'	'Acinetobacter baumannii'
'GCF_022921035.1'	'Pseudomonadota'	'Gammaproteobacteria'	'Moraxellales'	'Moraxellaceae'	'Acinetobacter'	'Acinetobacter baumannii'
'GCF_022921035.1'	'Pseudomonadota'	'Gammaproteobacteria'	'Moraxellales'	'Moraxellaceae'	'Acinetobacter'	'Acinetobacter baumannii'
'GCF_022921035.1'	'Pseudomonadota'	'Gammaproteobacteria'	'Moraxellales'	'Moraxellaceae'	'Acinetobacter'	'Acinetobacter baumannii'
'GCF_023093135.1'	'Pseudomonadota'	'Gammaproteobacteria'	'Moraxellales'	'Moraxellaceae'	'Acinetobacter'	'Acinetobacter baumannii'
'GCF_023093135.1'	'Pseudomonadota'	'Gammaproteobacteria'	'Moraxellales'	'Moraxellaceae'	'Acinetobacter'	'Acinetobacter baumannii'
'GCF_023093135.1'	'Pseudomonadota'	'Gammaproteobacteria'	'Moraxellales'	'Moraxellaceae'	'Acinetobacter'	'Acinetobacter baumannii'
'GCF_022916135.1'	'Pseudomonadota'	'Gammaproteobacteria'	'Moraxellales'	'Moraxellaceae'	'Acinetobacter'	'Acinetobacter baumannii'
'GCF_022916135.1'	'Pseudomonadota'	'Gammaproteobacteria'	'Moraxellales'	'Moraxellaceae'	'Acinetobacter'	'Acinetobacter baumannii'
'GCF_022916135.1'	'Pseudomonadota'	'Gammaproteobacteria'	'Moraxellales'	'Moraxellaceae'	'Acinetobacter'	'Acinetobacter baumannii'
'GCF_019703285.1'	'Pseudomonadota'	'Gammaproteobacteria'	'Moraxellales'	'Moraxellaceae'	'Acinetobacter'	'Acinetobacter baumannii'
'GCF_019703285.1'	'Pseudomonadota'	'Gammaproteobacteria'	'Moraxellales'	'Moraxellaceae'	'Acinetobacter'	'Acinetobacter baumannii'
'GCF_012934945.1'	'Pseudomonadota'	'Gammaproteobacteria'	'Moraxellales'	'Moraxellaceae'	'Acinetobacter'	'Acinetobacter baumannii'
'GCF_012934945.1'	'Pseudomonadota'	'Gammaproteobacteria'	'Moraxellales'	'Moraxellaceae'	'Acinetobacter'	'Acinetobacter baumannii'
'GCF_012934945.1'	'Pseudomonadota'	'Gammaproteobacteria'	'Moraxellales'	'Moraxellaceae'	'Acinetobacter'	'Acinetobacter baumannii'
'GCF_022459055.1'	'Pseudomonadota'	'Gammaproteobacteria'	'Moraxellales'	'Moraxellaceae'	'Acinetobacter'	'Acinetobacter baumannii'
'GCF_022459055.1'	'Pseudomonadota'	'Gammaproteobacteria'	'Moraxellales'	'Moraxellaceae'	'Acinetobacter'	'Acinetobacter baumannii'
'GCF_022459055.1'	'Pseudomonadota'	'Gammaproteobacteria'	'Moraxellales'	'Moraxellaceae'	'Acinetobacter'	'Acinetobacter baumannii'
'GCF_017096405.2'	'Pseudomonadota'	'Gammaproteobacteria'	'Moraxellales'	'Moraxellaceae'	'Acinetobacter'	'Acinetobacter baumannii'
'GCF_017096405.2'	'Pseudomonadota'	'Gammaproteobacteria'	'Moraxellales'	'Moraxellaceae'	'Acinetobacter'	'Acinetobacter baumannii'
'GCF_017096405.2'	'Pseudomonadota'	'Gammaproteobacteria'	'Moraxellales'	'Moraxellaceae'	'Acinetobacter'	'Acinetobacter baumannii'
'GCF_017096385.2'	'Pseudomonadota'	'Gammaproteobacteria'	'Moraxellales'	'Moraxellaceae'	'Acinetobacter'	'Acinetobacter baumannii'
'GCF_017096385.2'	'Pseudomonadota'	'Gammaproteobacteria'	'Moraxellales'	'Moraxellaceae'	'Acinetobacter'	'Acinetobacter baumannii'
'GCF_017096385.2'	'Pseudomonadota'	'Gammaproteobacteria'	'Moraxellales'	'Moraxellaceae'	'Acinetobacter'	'Acinetobacter baumannii'
'GCF_014171935.1'	'Pseudomonadota'	'Gammaproteobacteria'	'Moraxellales'	'Moraxellaceae'	'Acinetobacter'	'Acinetobacter baumannii'
'GCF_014171935.1'	'Pseudomonadota'	'Gammaproteobacteria'	'Moraxellales'	'Moraxellaceae'	'Acinetobacter'	'Acinetobacter baumannii'
'GCF_014171935.1'	'Pseudomonadota'	'Gammaproteobacteria'	'Moraxellales'	'Moraxellaceae'	'Acinetobacter'	'Acinetobacter baumannii'
'GCF_022468295.1'	'Pseudomonadota'	'Gammaproteobacteria'	'Moraxellales'	'Moraxellaceae'	'Acinetobacter'	'Acinetobacter baumannii'
'GCF_022468295.1'	'Pseudomonadota'	'Gammaproteobacteria'	'Moraxellales'	'Moraxellaceae'	'Acinetobacter'	'Acinetobacter baumannii'
'GCF_022468295.1'	'Pseudomonadota'	'Gammaproteobacteria'	'Moraxellales'	'Moraxellaceae'	'Acinetobacter'	'Acinetobacter baumannii'
'GCF_013416255.1'	'Pseudomonadota'	'Gammaproteobacteria'	'Moraxellales'	'Moraxellaceae'	'Acinetobacter'	'Acinetobacter baumannii'
'GCF_013416255.1'	'Pseudomonadota'	'Gammaproteobacteria'	'Moraxellales'	'Moraxellaceae'	'Acinetobacter'	'Acinetobacter baumannii'
'GCF_013416255.1'	'Pseudomonadota'	'Gammaproteobacteria'	'Moraxellales'	'Moraxellaceae'	'Acinetobacter'	'Acinetobacter baumannii'
'GCF_021398135.1'	'Pseudomonadota'	'Gammaproteobacteria'	'Moraxellales'	'Moraxellaceae'	'Acinetobacter'	'Acinetobacter baumannii'
'GCF_021398135.1'	'Pseudomonadota'	'Gammaproteobacteria'	'Moraxellales'	'Moraxellaceae'	'Acinetobacter'	'Acinetobacter baumannii'
'GCF_021398135.1'	'Pseudomonadota'	'Gammaproteobacteria'	'Moraxellales'	'Moraxellaceae'	'Acinetobacter'	'Acinetobacter baumannii'
'GCF_014267385.1'	'Pseudomonadota'	'Gammaproteobacteria'	'Moraxellales'	'Moraxellaceae'	'Acinetobacter'	'Acinetobacter baumannii'
'GCF_014267385.1'	'Pseudomonadota'	'Gammaproteobacteria'	'Moraxellales'	'Moraxellaceae'	'Acinetobacter'	'Acinetobacter baumannii'
'GCF_014267385.1'	'Pseudomonadota'	'Gammaproteobacteria'	'Moraxellales'	'Moraxellaceae'	'Acinetobacter'	'Acinetobacter baumannii'
'GCF_017096345.2'	'Pseudomonadota'	'Gammaproteobacteria'	'Moraxellales'	'Moraxellaceae'	'Acinetobacter'	'Acinetobacter baumannii'
'GCF_017096345.2'	'Pseudomonadota'	'Gammaproteobacteria'	'Moraxellales'	'Moraxellaceae'	'Acinetobacter'	'Acinetobacter baumannii'
'GCF_017096345.2'	'Pseudomonadota'	'Gammaproteobacteria'	'Moraxellales'	'Moraxellaceae'	'Acinetobacter'	'Acinetobacter baumannii'
'GCF_022605145.1'	'Pseudomonadota'	'Gammaproteobacteria'	'Moraxellales'	'Moraxellaceae'	'Acinetobacter'	'Acinetobacter baumannii'
'GCF_022605145.1'	'Pseudomonadota'	'Gammaproteobacteria'	'Moraxellales'	'Moraxellaceae'	'Acinetobacter'	'Acinetobacter baumannii'
'GCF_022605145.1'	'Pseudomonadota'	'Gammaproteobacteria'	'Moraxellales'	'Moraxellaceae'	'Acinetobacter'	'Acinetobacter baumannii'
'GCF_022468755.1'	'Pseudomonadota'	'Gammaproteobacteria'	'Moraxellales'	'Moraxellaceae'	'Acinetobacter'	'Acinetobacter baumannii'
'GCF_022468755.1'	'Pseudomonadota'	'Gammaproteobacteria'	'Moraxellales'	'Moraxellaceae'	'Acinetobacter'	'Acinetobacter baumannii'
'GCF_022468755.1'	'Pseudomonadota'	'Gammaproteobacteria'	'Moraxellales'	'Moraxellaceae'	'Acinetobacter'	'Acinetobacter baumannii'
'GCF_017098185.2'	'Pseudomonadota'	'Gammaproteobacteria'	'Moraxellales'	'Moraxellaceae'	'Acinetobacter'	'Acinetobacter baumannii'
'GCF_017098185.2'	'Pseudomonadota'	'Gammaproteobacteria'	'Moraxellales'	'Moraxellaceae'	'Acinetobacter'	'Acinetobacter baumannii'
'GCF_017098185.2'	'Pseudomonadota'	'Gammaproteobacteria'	'Moraxellales'	'Moraxellaceae'	'Acinetobacter'	'Acinetobacter baumannii'
'GCF_019356215.1'	'Pseudomonadota'	'Gammaproteobacteria'	'Moraxellales'	'Moraxellaceae'	'Acinetobacter'	'Acinetobacter baumannii'
'GCF_019356215.1'	'Pseudomonadota'	'Gammaproteobacteria'	'Moraxellales'	'Moraxellaceae'	'Acinetobacter'	'Acinetobacter baumannii'
'GCF_019356215.1'	'Pseudomonadota'	'Gammaproteobacteria'	'Moraxellales'	'Moraxellaceae'	'Acinetobacter'	'Acinetobacter baumannii'
'GCF_022468985.2'	'Pseudomonadota'	'Gammaproteobacteria'	'Moraxellales'	'Moraxellaceae'	'Acinetobacter'	'Acinetobacter baumannii'
'GCF_022468985.2'	'Pseudomonadota'	'Gammaproteobacteria'	'Moraxellales'	'Moraxellaceae'	'Acinetobacter'	'Acinetobacter baumannii'
'GCF_022468985.2'	'Pseudomonadota'	'Gammaproteobacteria'	'Moraxellales'	'Moraxellaceae'	'Acinetobacter'	'Acinetobacter baumannii'
'GCF_022467135.1'	'Pseudomonadota'	'Gammaproteobacteria'	'Moraxellales'	'Moraxellaceae'	'Acinetobacter'	'Acinetobacter baumannii'
'GCF_022467135.1'	'Pseudomonadota'	'Gammaproteobacteria'	'Moraxellales'	'Moraxellaceae'	'Acinetobacter'	'Acinetobacter baumannii'
'GCF_022467135.1'	'Pseudomonadota'	'Gammaproteobacteria'	'Moraxellales'	'Moraxellaceae'	'Acinetobacter'	'Acinetobacter baumannii'
'GCF_016864315.2'	'Pseudomonadota'	'Gammaproteobacteria'	'Moraxellales'	'Moraxellaceae'	'Acinetobacter'	'Acinetobacter baumannii'
'GCF_016864315.2'	'Pseudomonadota'	'Gammaproteobacteria'	'Moraxellales'	'Moraxellaceae'	'Acinetobacter'	'Acinetobacter baumannii'
'GCF_016864315.2'	'Pseudomonadota'	'Gammaproteobacteria'	'Moraxellales'	'Moraxellaceae'	'Acinetobacter'	'Acinetobacter baumannii'
'GCF_022459135.1'	'Pseudomonadota'	'Gammaproteobacteria'	'Moraxellales'	'Moraxellaceae'	'Acinetobacter'	'Acinetobacter baumannii'
'GCF_022459135.1'	'Pseudomonadota'	'Gammaproteobacteria'	'Moraxellales'	'Moraxellaceae'	'Acinetobacter'	'Acinetobacter baumannii'
'GCF_022459135.1'	'Pseudomonadota'	'Gammaproteobacteria'	'Moraxellales'	'Moraxellaceae'	'Acinetobacter'	'Acinetobacter baumannii'
'GCF_020271605.1'	'Pseudomonadota'	'Gammaproteobacteria'	'Moraxellales'	'Moraxellaceae'	'Acinetobacter'	'Acinetobacter baumannii'
'GCF_020271605.1'	'Pseudomonadota'	'Gammaproteobacteria'	'Moraxellales'	'Moraxellaceae'	'Acinetobacter'	'Acinetobacter baumannii'
'GCF_020271605.1'	'Pseudomonadota'	'Gammaproteobacteria'	'Moraxellales'	'Moraxellaceae'	'Acinetobacter'	'Acinetobacter baumannii'
'GCF_014322245.1'	'Pseudomonadota'	'Gammaproteobacteria'	'Moraxellales'	'Moraxellaceae'	'Acinetobacter'	'Acinetobacter baumannii'
'GCF_014322245.1'	'Pseudomonadota'	'Gammaproteobacteria'	'Moraxellales'	'Moraxellaceae'	'Acinetobacter'	'Acinetobacter baumannii'
'GCF_014322245.1'	'Pseudomonadota'	'Gammaproteobacteria'	'Moraxellales'	'Moraxellaceae'	'Acinetobacter'	'Acinetobacter baumannii'
'GCF_020985285.1'	'Pseudomonadota'	'Gammaproteobacteria'	'Moraxellales'	'Moraxellaceae'	'Acinetobacter'	'Acinetobacter baumannii'
'GCF_020985285.1'	'Pseudomonadota'	'Gammaproteobacteria'	'Moraxellales'	'Moraxellaceae'	'Acinetobacter'	'Acinetobacter baumannii'
'GCF_020985285.1'	'Pseudomonadota'	'Gammaproteobacteria'	'Moraxellales'	'Moraxellaceae'	'Acinetobacter'	'Acinetobacter baumannii'
'GCF_016903215.1'	'Pseudomonadota'	'Gammaproteobacteria'	'Moraxellales'	'Moraxellaceae'	'Acinetobacter'	'Acinetobacter baumannii'
'GCF_016903215.1'	'Pseudomonadota'	'Gammaproteobacteria'	'Moraxellales'	'Moraxellaceae'	'Acinetobacter'	'Acinetobacter baumannii'
'GCF_016903215.1'	'Pseudomonadota'	'Gammaproteobacteria'	'Moraxellales'	'Moraxellaceae'	'Acinetobacter'	'Acinetobacter baumannii'
'GCF_022429585.1'	'Pseudomonadota'	'Gammaproteobacteria'	'Moraxellales'	'Moraxellaceae'	'Acinetobacter'	'Acinetobacter baumannii'
'GCF_022429585.1'	'Pseudomonadota'	'Gammaproteobacteria'	'Moraxellales'	'Moraxellaceae'	'Acinetobacter'	'Acinetobacter baumannii'
'GCF_022429585.1'	'Pseudomonadota'	'Gammaproteobacteria'	'Moraxellales'	'Moraxellaceae'	'Acinetobacter'	'Acinetobacter baumannii'
'GCF_012935125.1'	'Pseudomonadota'	'Gammaproteobacteria'	'Moraxellales'	'Moraxellaceae'	'Acinetobacter'	'Acinetobacter baumannii'
'GCF_012935125.1'	'Pseudomonadota'	'Gammaproteobacteria'	'Moraxellales'	'Moraxellaceae'	'Acinetobacter'	'Acinetobacter baumannii'
'GCF_012935125.1'	'Pseudomonadota'	'Gammaproteobacteria'	'Moraxellales'	'Moraxellaceae'	'Acinetobacter'	'Acinetobacter baumannii'
'GCF_016864335.2'	'Pseudomonadota'	'Gammaproteobacteria'	'Moraxellales'	'Moraxellaceae'	'Acinetobacter'	'Acinetobacter baumannii'
'GCF_016864335.2'	'Pseudomonadota'	'Gammaproteobacteria'	'Moraxellales'	'Moraxellaceae'	'Acinetobacter'	'Acinetobacter baumannii'
'GCF_016864335.2'	'Pseudomonadota'	'Gammaproteobacteria'	'Moraxellales'	'Moraxellaceae'	'Acinetobacter'	'Acinetobacter baumannii'
'GCF_023221535.1'	'Pseudomonadota'	'Gammaproteobacteria'	'Moraxellales'	'Moraxellaceae'	'Acinetobacter'	'Acinetobacter baumannii'
'GCF_023221535.1'	'Pseudomonadota'	'Gammaproteobacteria'	'Moraxellales'	'Moraxellaceae'	'Acinetobacter'	'Acinetobacter baumannii'
'GCF_023221535.1'	'Pseudomonadota'	'Gammaproteobacteria'	'Moraxellales'	'Moraxellaceae'	'Acinetobacter'	'Acinetobacter baumannii'
'GCF_018135585.1'	'Pseudomonadota'	'Gammaproteobacteria'	'Moraxellales'	'Moraxellaceae'	'Acinetobacter'	'Acinetobacter baumannii'
'GCF_018135585.1'	'Pseudomonadota'	'Gammaproteobacteria'	'Moraxellales'	'Moraxellaceae'	'Acinetobacter'	'Acinetobacter baumannii'
'GCF_022811905.1'	'Pseudomonadota'	'Gammaproteobacteria'	'Moraxellales'	'Moraxellaceae'	'Acinetobacter'	'Acinetobacter baumannii'
'GCF_022811905.1'	'Pseudomonadota'	'Gammaproteobacteria'	'Moraxellales'	'Moraxellaceae'	'Acinetobacter'	'Acinetobacter baumannii'
'GCF_022811905.1'	'Pseudomonadota'	'Gammaproteobacteria'	'Moraxellales'	'Moraxellaceae'	'Acinetobacter'	'Acinetobacter baumannii'
'GCF_022467535.1'	'Pseudomonadota'	'Gammaproteobacteria'	'Moraxellales'	'Moraxellaceae'	'Acinetobacter'	'Acinetobacter baumannii'
'GCF_022467535.1'	'Pseudomonadota'	'Gammaproteobacteria'	'Moraxellales'	'Moraxellaceae'	'Acinetobacter'	'Acinetobacter baumannii'
'GCF_022467535.1'	'Pseudomonadota'	'Gammaproteobacteria'	'Moraxellales'	'Moraxellaceae'	'Acinetobacter'	'Acinetobacter baumannii'
'GCF_022467655.1'	'Pseudomonadota'	'Gammaproteobacteria'	'Moraxellales'	'Moraxellaceae'	'Acinetobacter'	'Acinetobacter baumannii'
'GCF_022467655.1'	'Pseudomonadota'	'Gammaproteobacteria'	'Moraxellales'	'Moraxellaceae'	'Acinetobacter'	'Acinetobacter baumannii'
'GCF_022467655.1'	'Pseudomonadota'	'Gammaproteobacteria'	'Moraxellales'	'Moraxellaceae'	'Acinetobacter'	'Acinetobacter baumannii'
'GCF_012931665.1'	'Pseudomonadota'	'Gammaproteobacteria'	'Moraxellales'	'Moraxellaceae'	'Acinetobacter'	'Acinetobacter baumannii'
'GCF_012931665.1'	'Pseudomonadota'	'Gammaproteobacteria'	'Moraxellales'	'Moraxellaceae'	'Acinetobacter'	'Acinetobacter baumannii'
'GCF_012931665.1'	'Pseudomonadota'	'Gammaproteobacteria'	'Moraxellales'	'Moraxellaceae'	'Acinetobacter'	'Acinetobacter baumannii'
'GCF_015870965.1'	'Pseudomonadota'	'Gammaproteobacteria'	'Moraxellales'	'Moraxellaceae'	'Acinetobacter'	'Acinetobacter baumannii'
'GCF_015870965.1'	'Pseudomonadota'	'Gammaproteobacteria'	'Moraxellales'	'Moraxellaceae'	'Acinetobacter'	'Acinetobacter baumannii'
'GCF_015870965.1'	'Pseudomonadota'	'Gammaproteobacteria'	'Moraxellales'	'Moraxellaceae'	'Acinetobacter'	'Acinetobacter baumannii'
'GCF_022467255.1'	'Pseudomonadota'	'Gammaproteobacteria'	'Moraxellales'	'Moraxellaceae'	'Acinetobacter'	'Acinetobacter baumannii'
'GCF_022467255.1'	'Pseudomonadota'	'Gammaproteobacteria'	'Moraxellales'	'Moraxellaceae'	'Acinetobacter'	'Acinetobacter baumannii'
'GCF_022467255.1'	'Pseudomonadota'	'Gammaproteobacteria'	'Moraxellales'	'Moraxellaceae'	'Acinetobacter'	'Acinetobacter baumannii'
'GCF_015870765.1'	'Pseudomonadota'	'Gammaproteobacteria'	'Moraxellales'	'Moraxellaceae'	'Acinetobacter'	'Acinetobacter baumannii'
'GCF_015870765.1'	'Pseudomonadota'	'Gammaproteobacteria'	'Moraxellales'	'Moraxellaceae'	'Acinetobacter'	'Acinetobacter baumannii'
'GCF_015870765.1'	'Pseudomonadota'	'Gammaproteobacteria'	'Moraxellales'	'Moraxellaceae'	'Acinetobacter'	'Acinetobacter baumannii'
'GCF_013376855.2'	'Pseudomonadota'	'Gammaproteobacteria'	'Moraxellales'	'Moraxellaceae'	'Acinetobacter'	'Acinetobacter baumannii'
'GCF_013376855.2'	'Pseudomonadota'	'Gammaproteobacteria'	'Moraxellales'	'Moraxellaceae'	'Acinetobacter'	'Acinetobacter baumannii'
'GCF_013376855.2'	'Pseudomonadota'	'Gammaproteobacteria'	'Moraxellales'	'Moraxellaceae'	'Acinetobacter'	'Acinetobacter baumannii'
'GCF_012974585.1'	'Pseudomonadota'	'Gammaproteobacteria'	'Moraxellales'	'Moraxellaceae'	'Acinetobacter'	'Acinetobacter baumannii'
'GCF_012974585.1'	'Pseudomonadota'	'Gammaproteobacteria'	'Moraxellales'	'Moraxellaceae'	'Acinetobacter'	'Acinetobacter baumannii'
'GCF_012974585.1'	'Pseudomonadota'	'Gammaproteobacteria'	'Moraxellales'	'Moraxellaceae'	'Acinetobacter'	'Acinetobacter baumannii'
'GCF_022467375.2'	'Pseudomonadota'	'Gammaproteobacteria'	'Moraxellales'	'Moraxellaceae'	'Acinetobacter'	'Acinetobacter baumannii'
'GCF_022467375.2'	'Pseudomonadota'	'Gammaproteobacteria'	'Moraxellales'	'Moraxellaceae'	'Acinetobacter'	'Acinetobacter baumannii'
'GCF_022467375.2'	'Pseudomonadota'	'Gammaproteobacteria'	'Moraxellales'	'Moraxellaceae'	'Acinetobacter'	'Acinetobacter baumannii'
'GCF_019997865.1'	'Pseudomonadota'	'Gammaproteobacteria'	'Moraxellales'	'Moraxellaceae'	'Acinetobacter'	'Acinetobacter baumannii'
'GCF_019997865.1'	'Pseudomonadota'	'Gammaproteobacteria'	'Moraxellales'	'Moraxellaceae'	'Acinetobacter'	'Acinetobacter baumannii'
'GCF_021764725.1'	'Pseudomonadota'	'Gammaproteobacteria'	'Moraxellales'	'Moraxellaceae'	'Acinetobacter'	'Acinetobacter baumannii'
'GCF_021764725.1'	'Pseudomonadota'	'Gammaproteobacteria'	'Moraxellales'	'Moraxellaceae'	'Acinetobacter'	'Acinetobacter baumannii'
'GCF_021764725.1'	'Pseudomonadota'	'Gammaproteobacteria'	'Moraxellales'	'Moraxellaceae'	'Acinetobacter'	'Acinetobacter baumannii'
'GCF_022468835.2'	'Pseudomonadota'	'Gammaproteobacteria'	'Moraxellales'	'Moraxellaceae'	'Acinetobacter'	'Acinetobacter baumannii'
'GCF_022468835.2'	'Pseudomonadota'	'Gammaproteobacteria'	'Moraxellales'	'Moraxellaceae'	'Acinetobacter'	'Acinetobacter baumannii'
'GCF_022468835.2'	'Pseudomonadota'	'Gammaproteobacteria'	'Moraxellales'	'Moraxellaceae'	'Acinetobacter'	'Acinetobacter baumannii'
'GCF_022460745.2'	'Pseudomonadota'	'Gammaproteobacteria'	'Moraxellales'	'Moraxellaceae'	'Acinetobacter'	'Acinetobacter baumannii'
'GCF_022460745.2'	'Pseudomonadota'	'Gammaproteobacteria'	'Moraxellales'	'Moraxellaceae'	'Acinetobacter'	'Acinetobacter baumannii'
'GCF_022460745.2'	'Pseudomonadota'	'Gammaproteobacteria'	'Moraxellales'	'Moraxellaceae'	'Acinetobacter'	'Acinetobacter baumannii'
'GCF_022468855.2'	'Pseudomonadota'	'Gammaproteobacteria'	'Moraxellales'	'Moraxellaceae'	'Acinetobacter'	'Acinetobacter baumannii'
'GCF_022468855.2'	'Pseudomonadota'	'Gammaproteobacteria'	'Moraxellales'	'Moraxellaceae'	'Acinetobacter'	'Acinetobacter baumannii'
'GCF_022468855.2'	'Pseudomonadota'	'Gammaproteobacteria'	'Moraxellales'	'Moraxellaceae'	'Acinetobacter'	'Acinetobacter baumannii'
'GCF_022468645.2'	'Pseudomonadota'	'Gammaproteobacteria'	'Moraxellales'	'Moraxellaceae'	'Acinetobacter'	'Acinetobacter baumannii'
'GCF_022468645.2'	'Pseudomonadota'	'Gammaproteobacteria'	'Moraxellales'	'Moraxellaceae'	'Acinetobacter'	'Acinetobacter baumannii'
'GCF_022468645.2'	'Pseudomonadota'	'Gammaproteobacteria'	'Moraxellales'	'Moraxellaceae'	'Acinetobacter'	'Acinetobacter baumannii'
'GCF_017726575.1'	'Pseudomonadota'	'Gammaproteobacteria'	'Moraxellales'	'Moraxellaceae'	'Acinetobacter'	'Acinetobacter baumannii'
'GCF_017726575.1'	'Pseudomonadota'	'Gammaproteobacteria'	'Moraxellales'	'Moraxellaceae'	'Acinetobacter'	'Acinetobacter baumannii'
'GCF_017726575.1'	'Pseudomonadota'	'Gammaproteobacteria'	'Moraxellales'	'Moraxellaceae'	'Acinetobacter'	'Acinetobacter baumannii'
'GCF_022461025.2'	'Pseudomonadota'	'Gammaproteobacteria'	'Moraxellales'	'Moraxellaceae'	'Acinetobacter'	'Acinetobacter baumannii'
'GCF_022461025.2'	'Pseudomonadota'	'Gammaproteobacteria'	'Moraxellales'	'Moraxellaceae'	'Acinetobacter'	'Acinetobacter baumannii'
'GCF_022461025.2'	'Pseudomonadota'	'Gammaproteobacteria'	'Moraxellales'	'Moraxellaceae'	'Acinetobacter'	'Acinetobacter baumannii'
'GCF_022460875.2'	'Pseudomonadota'	'Gammaproteobacteria'	'Moraxellales'	'Moraxellaceae'	'Acinetobacter'	'Acinetobacter baumannii'
'GCF_022460875.2'	'Pseudomonadota'	'Gammaproteobacteria'	'Moraxellales'	'Moraxellaceae'	'Acinetobacter'	'Acinetobacter baumannii'
'GCF_022460875.2'	'Pseudomonadota'	'Gammaproteobacteria'	'Moraxellales'	'Moraxellaceae'	'Acinetobacter'	'Acinetobacter baumannii'
'GCF_019903175.1'	'Pseudomonadota'	'Gammaproteobacteria'	'Moraxellales'	'Moraxellaceae'	'Acinetobacter'	'Acinetobacter baumannii'
'GCF_019903175.1'	'Pseudomonadota'	'Gammaproteobacteria'	'Moraxellales'	'Moraxellaceae'	'Acinetobacter'	'Acinetobacter baumannii'
'GCF_019903175.1'	'Pseudomonadota'	'Gammaproteobacteria'	'Moraxellales'	'Moraxellaceae'	'Acinetobacter'	'Acinetobacter baumannii'
'GCF_022369275.1'	'Pseudomonadota'	'Gammaproteobacteria'	'Moraxellales'	'Moraxellaceae'	'Acinetobacter'	'Acinetobacter baumannii'
'GCF_022369275.1'	'Pseudomonadota'	'Gammaproteobacteria'	'Moraxellales'	'Moraxellaceae'	'Acinetobacter'	'Acinetobacter baumannii'
'GCF_022369275.1'	'Pseudomonadota'	'Gammaproteobacteria'	'Moraxellales'	'Moraxellaceae'	'Acinetobacter'	'Acinetobacter baumannii'
'GCF_019903195.1'	'Pseudomonadota'	'Gammaproteobacteria'	'Moraxellales'	'Moraxellaceae'	'Acinetobacter'	'Acinetobacter baumannii'
'GCF_019903195.1'	'Pseudomonadota'	'Gammaproteobacteria'	'Moraxellales'	'Moraxellaceae'	'Acinetobacter'	'Acinetobacter baumannii'
'GCF_019903195.1'	'Pseudomonadota'	'Gammaproteobacteria'	'Moraxellales'	'Moraxellaceae'	'Acinetobacter'	'Acinetobacter baumannii'
'GCF_013787185.1'	'Pseudomonadota'	'Gammaproteobacteria'	'Moraxellales'	'Moraxellaceae'	'Acinetobacter'	'Acinetobacter baumannii'
'GCF_013787185.1'	'Pseudomonadota'	'Gammaproteobacteria'	'Moraxellales'	'Moraxellaceae'	'Acinetobacter'	'Acinetobacter baumannii'
'GCF_022369355.1'	'Pseudomonadota'	'Gammaproteobacteria'	'Moraxellales'	'Moraxellaceae'	'Acinetobacter'	'Acinetobacter baumannii'
'GCF_022369355.1'	'Pseudomonadota'	'Gammaproteobacteria'	'Moraxellales'	'Moraxellaceae'	'Acinetobacter'	'Acinetobacter baumannii'
'GCF_022369355.1'	'Pseudomonadota'	'Gammaproteobacteria'	'Moraxellales'	'Moraxellaceae'	'Acinetobacter'	'Acinetobacter baumannii'
'GCF_019076685.1'	'Pseudomonadota'	'Gammaproteobacteria'	'Moraxellales'	'Moraxellaceae'	'Acinetobacter'	'Acinetobacter baumannii'
'GCF_019076685.1'	'Pseudomonadota'	'Gammaproteobacteria'	'Moraxellales'	'Moraxellaceae'	'Acinetobacter'	'Acinetobacter baumannii'
'GCF_019076685.1'	'Pseudomonadota'	'Gammaproteobacteria'	'Moraxellales'	'Moraxellaceae'	'Acinetobacter'	'Acinetobacter baumannii'
'GCF_019903215.1'	'Pseudomonadota'	'Gammaproteobacteria'	'Moraxellales'	'Moraxellaceae'	'Acinetobacter'	'Acinetobacter baumannii'
'GCF_019903215.1'	'Pseudomonadota'	'Gammaproteobacteria'	'Moraxellales'	'Moraxellaceae'	'Acinetobacter'	'Acinetobacter baumannii'
'GCF_019903215.1'	'Pseudomonadota'	'Gammaproteobacteria'	'Moraxellales'	'Moraxellaceae'	'Acinetobacter'	'Acinetobacter baumannii'
'GCF_018831465.1'	'Pseudomonadota'	'Gammaproteobacteria'	'Moraxellales'	'Moraxellaceae'	'Acinetobacter'	'Acinetobacter baumannii'
'GCF_018831465.1'	'Pseudomonadota'	'Gammaproteobacteria'	'Moraxellales'	'Moraxellaceae'	'Acinetobacter'	'Acinetobacter baumannii'
'GCF_018831465.1'	'Pseudomonadota'	'Gammaproteobacteria'	'Moraxellales'	'Moraxellaceae'	'Acinetobacter'	'Acinetobacter baumannii'
'GCF_014672735.1'	'Pseudomonadota'	'Gammaproteobacteria'	'Moraxellales'	'Moraxellaceae'	'Acinetobacter'	'Acinetobacter baumannii'
'GCF_014672735.1'	'Pseudomonadota'	'Gammaproteobacteria'	'Moraxellales'	'Moraxellaceae'	'Acinetobacter'	'Acinetobacter baumannii'
'GCF_014672735.1'	'Pseudomonadota'	'Gammaproteobacteria'	'Moraxellales'	'Moraxellaceae'	'Acinetobacter'	'Acinetobacter baumannii'
'GCF_017753625.1'	'Pseudomonadota'	'Gammaproteobacteria'	'Moraxellales'	'Moraxellaceae'	'Acinetobacter'	'Acinetobacter baumannii'
'GCF_017753625.1'	'Pseudomonadota'	'Gammaproteobacteria'	'Moraxellales'	'Moraxellaceae'	'Acinetobacter'	'Acinetobacter baumannii'
'GCF_017753625.1'	'Pseudomonadota'	'Gammaproteobacteria'	'Moraxellales'	'Moraxellaceae'	'Acinetobacter'	'Acinetobacter baumannii'
'GCF_015571935.1'	'Pseudomonadota'	'Gammaproteobacteria'	'Moraxellales'	'Moraxellaceae'	'Acinetobacter'	'Acinetobacter baumannii'
'GCF_015571935.1'	'Pseudomonadota'	'Gammaproteobacteria'	'Moraxellales'	'Moraxellaceae'	'Acinetobacter'	'Acinetobacter baumannii'
'GCF_015571935.1'	'Pseudomonadota'	'Gammaproteobacteria'	'Moraxellales'	'Moraxellaceae'	'Acinetobacter'	'Acinetobacter baumannii'
'GCF_014169655.1'	'Pseudomonadota'	'Gammaproteobacteria'	'Moraxellales'	'Moraxellaceae'	'Acinetobacter'	'Acinetobacter baumannii'
'GCF_014169655.1'	'Pseudomonadota'	'Gammaproteobacteria'	'Moraxellales'	'Moraxellaceae'	'Acinetobacter'	'Acinetobacter baumannii'
'GCF_014169655.1'	'Pseudomonadota'	'Gammaproteobacteria'	'Moraxellales'	'Moraxellaceae'	'Acinetobacter'	'Acinetobacter baumannii'
'GCF_013416275.1'	'Pseudomonadota'	'Gammaproteobacteria'	'Moraxellales'	'Moraxellaceae'	'Acinetobacter'	'Acinetobacter baumannii'
'GCF_013416275.1'	'Pseudomonadota'	'Gammaproteobacteria'	'Moraxellales'	'Moraxellaceae'	'Acinetobacter'	'Acinetobacter baumannii'
'GCF_013416275.1'	'Pseudomonadota'	'Gammaproteobacteria'	'Moraxellales'	'Moraxellaceae'	'Acinetobacter'	'Acinetobacter baumannii'
'GCF_022459075.1'	'Pseudomonadota'	'Gammaproteobacteria'	'Moraxellales'	'Moraxellaceae'	'Acinetobacter'	'Acinetobacter baumannii'
'GCF_022459075.1'	'Pseudomonadota'	'Gammaproteobacteria'	'Moraxellales'	'Moraxellaceae'	'Acinetobacter'	'Acinetobacter baumannii'
'GCF_022459075.1'	'Pseudomonadota'	'Gammaproteobacteria'	'Moraxellales'	'Moraxellaceae'	'Acinetobacter'	'Acinetobacter baumannii'
'GCF_019903235.1'	'Pseudomonadota'	'Gammaproteobacteria'	'Moraxellales'	'Moraxellaceae'	'Acinetobacter'	'Acinetobacter baumannii'
'GCF_019903235.1'	'Pseudomonadota'	'Gammaproteobacteria'	'Moraxellales'	'Moraxellaceae'	'Acinetobacter'	'Acinetobacter baumannii'
'GCF_000046845.1'	'Pseudomonadota'	'Gammaproteobacteria'	'Moraxellales'	'Moraxellaceae'	'Acinetobacter'	'Acinetobacter baylyi'
'GCF_000046845.1'	'Pseudomonadota'	'Gammaproteobacteria'	'Moraxellales'	'Moraxellaceae'	'Acinetobacter'	'Acinetobacter baylyi'
'GCF_000046845.1'	'Pseudomonadota'	'Gammaproteobacteria'	'Moraxellales'	'Moraxellaceae'	'Acinetobacter'	'Acinetobacter baylyi'
'GCF_025995075.1'	'Pseudomonadota'	'Gammaproteobacteria'	'Moraxellales'	'Moraxellaceae'	'Acinetobacter'	'Acinetobacter baumannii'
'GCF_025995075.1'	'Pseudomonadota'	'Gammaproteobacteria'	'Moraxellales'	'Moraxellaceae'	'Acinetobacter'	'Acinetobacter baumannii'
'GCF_025995075.1'	'Pseudomonadota'	'Gammaproteobacteria'	'Moraxellales'	'Moraxellaceae'	'Acinetobacter'	'Acinetobacter baumannii'
'GCF_019331655.1'	'Pseudomonadota'	'Gammaproteobacteria'	'Moraxellales'	'Moraxellaceae'	'Acinetobacter'	'Acinetobacter baumannii'
'GCF_019331655.1'	'Pseudomonadota'	'Gammaproteobacteria'	'Moraxellales'	'Moraxellaceae'	'Acinetobacter'	'Acinetobacter baumannii'
'GCF_019331655.1'	'Pseudomonadota'	'Gammaproteobacteria'	'Moraxellales'	'Moraxellaceae'	'Acinetobacter'	'Acinetobacter baumannii'
'GCF_024139035.1'	'Pseudomonadota'	'Gammaproteobacteria'	'Moraxellales'	'Moraxellaceae'	'Acinetobacter'	'Acinetobacter baumannii'
'GCF_024139035.1'	'Pseudomonadota'	'Gammaproteobacteria'	'Moraxellales'	'Moraxellaceae'	'Acinetobacter'	'Acinetobacter baumannii'
'GCF_024139035.1'	'Pseudomonadota'	'Gammaproteobacteria'	'Moraxellales'	'Moraxellaceae'	'Acinetobacter'	'Acinetobacter baumannii'
'GCF_023981045.1'	'Pseudomonadota'	'Gammaproteobacteria'	'Moraxellales'	'Moraxellaceae'	'Acinetobacter'	'Acinetobacter baumannii'
'GCF_023981045.1'	'Pseudomonadota'	'Gammaproteobacteria'	'Moraxellales'	'Moraxellaceae'	'Acinetobacter'	'Acinetobacter baumannii'
'GCF_023981045.1'	'Pseudomonadota'	'Gammaproteobacteria'	'Moraxellales'	'Moraxellaceae'	'Acinetobacter'	'Acinetobacter baumannii'
'GCF_023517195.1'	'Pseudomonadota'	'Gammaproteobacteria'	'Moraxellales'	'Moraxellaceae'	'Acinetobacter'	'Acinetobacter baumannii'
'GCF_023517195.1'	'Pseudomonadota'	'Gammaproteobacteria'	'Moraxellales'	'Moraxellaceae'	'Acinetobacter'	'Acinetobacter baumannii'
'GCF_023517195.1'	'Pseudomonadota'	'Gammaproteobacteria'	'Moraxellales'	'Moraxellaceae'	'Acinetobacter'	'Acinetobacter baumannii'
'GCF_029674685.1'	'Pseudomonadota'	'Gammaproteobacteria'	'Moraxellales'	'Moraxellaceae'	'Acinetobacter'	'Acinetobacter baumannii'
'GCF_029674685.1'	'Pseudomonadota'	'Gammaproteobacteria'	'Moraxellales'	'Moraxellaceae'	'Acinetobacter'	'Acinetobacter baumannii'
'GCF_029674685.1'	'Pseudomonadota'	'Gammaproteobacteria'	'Moraxellales'	'Moraxellaceae'	'Acinetobacter'	'Acinetobacter baumannii'
'GCF_023809625.1'	'Pseudomonadota'	'Gammaproteobacteria'	'Moraxellales'	'Moraxellaceae'	'Acinetobacter'	'Acinetobacter baumannii'
'GCF_023809625.1'	'Pseudomonadota'	'Gammaproteobacteria'	'Moraxellales'	'Moraxellaceae'	'Acinetobacter'	'Acinetobacter baumannii'
'GCF_023809625.1'	'Pseudomonadota'	'Gammaproteobacteria'	'Moraxellales'	'Moraxellaceae'	'Acinetobacter'	'Acinetobacter baumannii'
'GCF_024139095.1'	'Pseudomonadota'	'Gammaproteobacteria'	'Moraxellales'	'Moraxellaceae'	'Acinetobacter'	'Acinetobacter baumannii'
'GCF_024139095.1'	'Pseudomonadota'	'Gammaproteobacteria'	'Moraxellales'	'Moraxellaceae'	'Acinetobacter'	'Acinetobacter baumannii'
'GCF_024139095.1'	'Pseudomonadota'	'Gammaproteobacteria'	'Moraxellales'	'Moraxellaceae'	'Acinetobacter'	'Acinetobacter baumannii'
'GCF_025916215.1'	'Pseudomonadota'	'Gammaproteobacteria'	'Moraxellales'	'Moraxellaceae'	'Acinetobacter'	'Acinetobacter baumannii'
'GCF_025916215.1'	'Pseudomonadota'	'Gammaproteobacteria'	'Moraxellales'	'Moraxellaceae'	'Acinetobacter'	'Acinetobacter baumannii'
'GCF_025916215.1'	'Pseudomonadota'	'Gammaproteobacteria'	'Moraxellales'	'Moraxellaceae'	'Acinetobacter'	'Acinetobacter baumannii'
'GCF_025258785.1'	'Pseudomonadota'	'Gammaproteobacteria'	'Moraxellales'	'Moraxellaceae'	'Acinetobacter'	'Acinetobacter baumannii'
'GCF_025258785.1'	'Pseudomonadota'	'Gammaproteobacteria'	'Moraxellales'	'Moraxellaceae'	'Acinetobacter'	'Acinetobacter baumannii'
'GCF_025258785.1'	'Pseudomonadota'	'Gammaproteobacteria'	'Moraxellales'	'Moraxellaceae'	'Acinetobacter'	'Acinetobacter baumannii'
'GCF_025369955.1'	'Pseudomonadota'	'Gammaproteobacteria'	'Moraxellales'	'Moraxellaceae'	'Acinetobacter'	'Acinetobacter baumannii'
'GCF_025369955.1'	'Pseudomonadota'	'Gammaproteobacteria'	'Moraxellales'	'Moraxellaceae'	'Acinetobacter'	'Acinetobacter baumannii'
'GCF_025369955.1'	'Pseudomonadota'	'Gammaproteobacteria'	'Moraxellales'	'Moraxellaceae'	'Acinetobacter'	'Acinetobacter baumannii'
'GCF_025258845.1'	'Pseudomonadota'	'Gammaproteobacteria'	'Moraxellales'	'Moraxellaceae'	'Acinetobacter'	'Acinetobacter baumannii'
'GCF_025258845.1'	'Pseudomonadota'	'Gammaproteobacteria'	'Moraxellales'	'Moraxellaceae'	'Acinetobacter'	'Acinetobacter baumannii'
'GCF_025258845.1'	'Pseudomonadota'	'Gammaproteobacteria'	'Moraxellales'	'Moraxellaceae'	'Acinetobacter'	'Acinetobacter baumannii'
'GCF_025258745.1'	'Pseudomonadota'	'Gammaproteobacteria'	'Moraxellales'	'Moraxellaceae'	'Acinetobacter'	'Acinetobacter baumannii'
'GCF_025258745.1'	'Pseudomonadota'	'Gammaproteobacteria'	'Moraxellales'	'Moraxellaceae'	'Acinetobacter'	'Acinetobacter baumannii'
'GCF_025258745.1'	'Pseudomonadota'	'Gammaproteobacteria'	'Moraxellales'	'Moraxellaceae'	'Acinetobacter'	'Acinetobacter baumannii'
'GCF_025258805.1'	'Pseudomonadota'	'Gammaproteobacteria'	'Moraxellales'	'Moraxellaceae'	'Acinetobacter'	'Acinetobacter baumannii'
'GCF_025258805.1'	'Pseudomonadota'	'Gammaproteobacteria'	'Moraxellales'	'Moraxellaceae'	'Acinetobacter'	'Acinetobacter baumannii'
'GCF_025258805.1'	'Pseudomonadota'	'Gammaproteobacteria'	'Moraxellales'	'Moraxellaceae'	'Acinetobacter'	'Acinetobacter baumannii'
'GCF_025258765.1'	'Pseudomonadota'	'Gammaproteobacteria'	'Moraxellales'	'Moraxellaceae'	'Acinetobacter'	'Acinetobacter baumannii'
[truncated: 29,937 more rows]
