# Supplementary material for: Feature sequence-based genome mining uncovers the hidden diversity of bacterial siderophore pathways
Source: eLife. 2024 Oct 1;13:RP96719. doi: 10.7554/eLife.96719 (PMC11444679; doi:10.7554/eLife.96719)
Supplement: Supplementary file 12. [file elife-96719-supp12.xlsx]

## Sheet: Sheet1
BGC_idx	BGC_type	spname	product	domain_id	substrate	short	aaseq	dnaseq	structure	evidences	publications	genus
BGC0000330	NRP	Cupriavidus necator H16	cupriachelin	nrpspksdomains_H16_B1687_AMP-binding.1	aspartic acid	asp	FEAGVRAHPERLAVDAADAQLSYGALDAGADALASRLQQGGVRPGDVVGLLLPRGAGMAVAMLASWKAGAAFLCLDAAMPAARLAQLAADADLKAVVGEGGQPQWLADVLPDAGWHAVSLRADAAILPATWPAAVPAQPAYLIYTSGSTGTPKAVVVTQGNLAHYAAGVLHALALPAGSSMASLSSVTADLGHTAWFGALLGGHTLRVLDDGLGEDPEALASALAARPVDCLKIVPSHLRALLAVADPARLVPRQCLVFGGEALDAALVARVQALHPACRVVNHYGPTETTVGCLTHPVPSGGAQGAIPVGRPLPGVSAYVLDRHLNPVPRGAAGELYVGGAGVASGYLRRPALSAERFVPDPFQPGGRLYRTGDRVRMTDDGAIVFLGRADAQVKIR	TTCGAGGCCGGCGTGCGCGCGCATCCGGAGCGCCTCGCGGTAGACGCTGCCGATGCGCAGTTGTCCTACGGTGCGCTCGACGCCGGCGCTGACGCGCTTGCCTCGCGATTGCAGCAAGGTGGCGTGCGCCCCGGCGACGTGGTCGGCCTGCTGCTGCCGCGAGGCGCCGGCATGGCCGTGGCCATGCTCGCCTCGTGGAAAGCGGGCGCCGCGTTCCTGTGCCTCGACGCAGCCATGCCCGCCGCGCGGCTGGCACAACTGGCGGCAGATGCGGACCTGAAAGCGGTAGTGGGCGAGGGGGGGCAGCCGCAGTGGCTGGCGGACGTGTTGCCCGATGCCGGCTGGCATGCCGTATCCCTGCGAGCAGATGCCGCAATTCTCCCGGCGACATGGCCCGCT…	CCCCCCCCCC(=O)N[C@@H]([C@H](O)C(O)=O)C(=O)N[C@@H](CCN)C(=O)N[C@@H]([C@H](O)C(O)=O)C(=O)NCC(=O)N[C@@H](CCCN(O)C(=O)C[C@H](C)O)C(O)=O	['Structure-based inference']	['pubmed:22381697']	Cupriavidus
BGC0000330	NRP	Cupriavidus necator H16	cupriachelin	nrpspksdomains_H16_B1687_AMP-binding.2	2,4-diaminobutyric acid	dab	VAAHPERVLARCGDAALTYGDWWQRAGRLAGGLRSAGVAQDDVVAVLLPRGLDWLVALAGILRAGAAWVPLDVSHPPARWQQVLAQARPAQVLTDAAGAAALAEAGIAGARTLAAVEASAAGTTALHTSSHPAQLAYVLFTSGSTGVPKGAMVTRAGMLNNMLAKVVPLGLGEGDVIAQTAPPCFDISVWQALAAPLFGARVEVVADDVVRDPSALTALLAQRGVTLFEPVPSLLQAVLDCQAAEGRDAPLPALRWVLPTGEALPPATARAWFGRYPAVPLMNAYGPAECSDDVAFHPLSADSLGQGSDTVPIGRPTANAVLQVLDADGNLAAPGVIGEVAVAGAGVGRGYLADPRRTAAAFVPDPTGAPGSRRYLTGDLGRWQAGGVLEYVGRKDFQV…	GTCGCCGCGCATCCGGAGCGCGTGCTGGCGCGCTGCGGCGATGCCGCACTGACCTATGGCGACTGGTGGCAACGTGCCGGCCGGCTCGCCGGGGGCCTGCGTTCCGCGGGCGTGGCGCAGGATGACGTCGTCGCAGTGCTGCTGCCGCGCGGGCTCGACTGGCTGGTCGCGCTGGCCGGAATACTGCGCGCAGGCGCGGCCTGGGTGCCGCTTGACGTCAGCCATCCCCCGGCACGCTGGCAACAGGTGCTGGCACAGGCGCGCCCCGCGCAGGTGCTGACCGATGCTGCAGGCGCCGCCGCGCTCGCCGAGGCAGGGATCGCAGGCGCCCGGACGCTGGCAGCCGTAGAGGCCTCCGCCGCGGGAACGACGGCACTGCACACATCCTCGCACCCCGCC…	CCCCCCCCCC(=O)N[C@@H]([C@H](O)C(O)=O)C(=O)N[C@@H](CCN)C(=O)N[C@@H]([C@H](O)C(O)=O)C(=O)NCC(=O)N[C@@H](CCCN(O)C(=O)C[C@H](C)O)C(O)=O	['Structure-based inference']	['pubmed:22381697']	Cupriavidus
BGC0000330	NRP	Cupriavidus necator H16	cupriachelin	nrpspksdomains_H16_B1686_AMP-binding.1	aspartic acid	asp	AQHARQTPDAPALDAADLVLDYAGLQRTVQGAAQRLRALGVGPGTRVALALPRSGALVASLLAVWAAGGAYVPLDPAWPQARRRSVLAQSAPVLTIAQQAAHDNATVIRADALLAKAAQVDGEFASAQEDAAYVLFTSGSTGEPKGVVVGHRQISHYTAAVCEALSLASCRRLGLTSSVAADLGNTTLFAALWQGACLTVASDDDMAHPAAFARYLRGREVDAIKIVPSHLAALLETDAPAVPATVILGGEPLPASLVQGLRRHAPDCRIFNHYGPTETTIGVMVHAVGAEDPAWPAGTAPLSRALGATRVRLLDDALRPVPAGVAGQLYVGGPQLAHGYLGRPDLDAAAFVDDPFAAGQRLYRTGDLARATPAGLQLLGRADQQVKIR	GCGCAGCATGCCCGGCAGACACCGGATGCACCCGCGCTCGATGCCGCGGACCTGGTGCTCGACTACGCCGGCCTGCAGCGCACCGTGCAAGGCGCCGCGCAACGGCTGCGCGCGCTTGGCGTCGGCCCTGGCACGCGCGTGGCGCTGGCGCTGCCGCGCAGCGGCGCGCTGGTGGCGAGCCTGCTGGCGGTATGGGCCGCGGGCGGGGCCTATGTGCCGCTCGACCCGGCGTGGCCGCAGGCGCGCCGCCGCAGCGTGCTGGCGCAGTCGGCGCCGGTGCTGACCATCGCGCAGCAGGCTGCCCACGATAACGCCACGGTGATCCGTGCCGATGCGCTGCTGGCCAAGGCCGCACAGGTTGATGGCGAATTTGCCAGCGCACAGGAAGACGCCGCCTAC…	CCCCCCCCCC(=O)N[C@@H]([C@H](O)C(O)=O)C(=O)N[C@@H](CCN)C(=O)N[C@@H]([C@H](O)C(O)=O)C(=O)NCC(=O)N[C@@H](CCCN(O)C(=O)C[C@H](C)O)C(O)=O	['Activity assay']	['pubmed:22381697']	Cupriavidus
BGC0000964	NRP_Polyketide	Burkholderia thailandensis E264	burkholdac A	nrpspksdomains_BTH_I2367_AMP-binding.1	cysteine	cys	VRHANAHPDAVAVRQGGAALTYGQLLRDAEDIGSALQRLGVARGDVVAAVVEPGPRAVAALLGIELAGAVYLPVEPSWPSARIDALLREAGVRHAVATTGDFDLPVPSLRLDRPLARATPAPVADAGPSDAAYVIFTSGSTGRPKGVVITHEAAANTIDDINARFAVGPADRALCVSSLAFDLSVYDIFGLLAAGGAVVFPERARDPDAISQALSDAAVTIWNSVPAVLELLLDVAAPRSAHLRLALLSGDWIAPTLPERLRDAFPNVQPISLGGATEASIWSVVHPIAPADAALASIPYGKPLSNQQCFVRAPDGRERPHGVAGELLLGGCGLALAYLGNEAETARRFFVDADGRRLYRTGDLARWLPSGELELLGRMDGQVKV	GTCAGGCACGCGAATGCGCACCCCGATGCCGTCGCCGTGAGGCAGGGCGGTGCGGCTCTAACCTATGGACAGCTGTTGCGCGACGCCGAAGACATCGGCAGCGCGCTGCAGCGGCTCGGCGTCGCGCGCGGCGATGTCGTGGCGGCCGTCGTCGAGCCGGGGCCGCGCGCGGTTGCGGCGCTGCTCGGCATCGAATTGGCCGGCGCGGTCTATCTGCCGGTCGAGCCGTCCTGGCCGTCGGCGCGCATCGACGCGCTGCTGCGTGAGGCGGGCGTCCGCCACGCAGTCGCGACGACGGGCGACTTCGATCTGCCGGTGCCGTCGCTGCGCCTCGATCGTCCGCTCGCGCGCGCCACGCCCGCGCCGGTGGCGGATGCGGGCCCGAGCGACGCCGCCTAC…	O=C(NC(C(C)C)C(O)CC1=O)C(CSSCC/C=C/C2O1)NC(C(NC(C2)=O)CCSC)=O	['Structure-based inference']	['pubmed:21348454', 'pubmed:22091906', 'pubmed:24589486']	Burkholderia
BGC0000964	NRP_Polyketide	Burkholderia thailandensis E264	burkholdac A	nrpspksdomains_BTH_I2364_AMP-binding.1	methionine	met	FEAQAQRTPDATAAVFEERALSYAELNRRANRLAHHLIARGVRPDDRVAICTGRGLDAVVGLLAVLKAGGAYVPLDPAYPAARLAYMLDDAAPAAVLTTAALADELAFKLPTILLDAQNPSFESQPNDNPDPAALGLTSRHLAYVIYTSGSTGQPKGVMVEHGNLVNLIQSNRQHFSGVGQARTCCWTSFGFDVCVFEIFMSLAMGGTVHVVPDRLRISADGFFQWLIAQRIEVAYLPPFLVRRLREYSDELVASLSLRRILVGVEPLREKDLYRLERLLPELIVVNGYGPTETTVFSTSYLDMRDYDRAAPIGRPIANTRIYILDSHGQPVPIGVAGEIHIAGAGVARGYLNRPELTAERFVSDSFAAAPNARMYRTGDLGRWLPDGTIEYLGRNDFQ…	TTCGAGGCGCAAGCGCAGCGCACGCCCGACGCCACCGCGGCGGTGTTCGAGGAGCGGGCGCTCAGCTATGCGGAGCTGAACCGCCGTGCCAACCGGTTGGCACATCATCTGATCGCACGAGGGGTGCGGCCGGACGACCGCGTGGCGATATGTACGGGACGCGGCTTGGATGCGGTGGTGGGCTTGCTCGCCGTCCTCAAGGCGGGCGGCGCCTATGTGCCGCTCGACCCGGCGTATCCGGCCGCGCGGCTTGCCTACATGCTCGACGACGCGGCGCCGGCGGCGGTGCTGACCACGGCAGCGCTGGCCGATGAGCTGGCGTTCAAACTGCCGACGATCCTGCTCGACGCCCAGAATCCGTCTTTCGAGTCGCAGCCGAATGACAATCCCGACCCGGCG…	O=C(NC(C(C)C)C(O)CC1=O)C(CSSCC/C=C/C2O1)NC(C(NC(C2)=O)CCSC)=O	['Structure-based inference']	['pubmed:21348454', 'pubmed:22091906', 'pubmed:24589486']	Burkholderia
BGC0000964	NRP_Polyketide	Burkholderia thailandensis E264	burkholdac A	nrpspksdomains_BTH_I2364_AMP-binding.2	cysteine	cys	ERHAALTPLAPAIICAEGCMQYRELAAETRRVAGAVVAAGARREPVAVLLPRSVGAIAAYSGVMRAGCAYVPIDPATPPERMRDVLATLNYVLTTRALAAALDGIDARVILVDEAAAADVAPPTVALDDLAYVMFTSGSTGKPKGVMIDHRAASLTIESILRRYAIGPADRLLCVSSVGFDLSVFDFFGAFAAGAAVVLAPESSNVEPHVWLDLMERERATVWESVPAVMELLLLECRNSGRKLPPSLKLVMLSGDRVPVSLPARIREAATAELHVIALGGATEAAIWSCYYDTRHLPPDASFVPYGRHLPGQRLYVLSSSLRPLPIGVPGDLWIAGAGVARGYLGQPDLTAYRFVADPHVPGERMYRTGDRARVLADGNLEFLGRVDDQVKIR	GAGCGCCACGCCGCGCTCACGCCGCTCGCGCCCGCGATCATCTGCGCCGAGGGCTGCATGCAGTATCGCGAACTGGCGGCGGAAACGCGCCGCGTGGCCGGCGCGGTCGTTGCGGCTGGTGCGCGGCGTGAACCGGTTGCGGTGCTGCTGCCGCGCTCGGTCGGCGCGATCGCCGCGTATTCCGGCGTGATGCGTGCGGGTTGCGCGTATGTGCCCATCGATCCGGCGACGCCGCCGGAGCGCATGCGCGACGTGCTCGCCACGCTCAACTACGTGCTGACGACGCGCGCACTCGCCGCGGCGCTCGACGGCATCGACGCGCGGGTGATCCTCGTCGACGAGGCCGCAGCCGCCGATGTCGCGCCTCCGACGGTCGCGCTCGACGATCTCGCCTATGTG…	O=C(NC(C(C)C)C(O)CC1=O)C(CSSCC/C=C/C2O1)NC(C(NC(C2)=O)CCSC)=O	['Structure-based inference']	['pubmed:21348454', 'pubmed:22091906', 'pubmed:24589486']	Burkholderia
BGC0000964	NRP_Polyketide	Burkholderia thailandensis E264	burkholdac A	nrpspksdomains_BTH_I2364_AMP-binding.3	isoleucine	ile	DEQAVARPQATALRLGDRRLSYAELTARGRRMAAWLQGQGVGVGGRVAIVGERTMETIAAMYGILASGAAYVPLDPDWPDERKALVIEDAQPLMVIGGGGAWCGAVRQVELAELDVTPDAALTPHQATVDDLAYVIYTSGSTGRPKGVMVRHGDVMHLDGLRERMALSETDVWTAFHSYAFDYSILEIWYPLMTGATVVPVPYWVTRSPEAFHELLRTEGATIVCQTPAAFQQLVAVPHRGVRLRWAVVGGETYHASLPASADPAQYPRIANVYGITETTVITTFEPLERGQPVTIGRPFPGQRIYLLDRHGRLVPPGAVGEIHVAGEGIAAGYLGAQALTAQRFVADPYRPGERMYRSGDLGRFLPGGRMESLGRADRQVKIR	GACGAGCAGGCCGTTGCGCGGCCCCAAGCTACGGCGTTGCGGCTTGGCGATCGGCGGCTCAGTTATGCGGAGCTGACGGCGCGGGGCCGACGAATGGCGGCTTGGCTGCAGGGGCAAGGCGTGGGCGTGGGCGGGCGTGTCGCGATAGTCGGCGAGCGGACGATGGAGACGATCGCCGCGATGTACGGGATTCTGGCAAGCGGCGCCGCCTACGTGCCGTTGGACCCCGACTGGCCGGACGAACGCAAGGCGCTCGTGATCGAGGACGCGCAGCCGCTGATGGTGATCGGAGGCGGCGGGGCATGGTGCGGCGCGGTGCGGCAGGTCGAATTGGCGGAACTCGATGTCACGCCTGACGCGGCGCTCACGCCACATCAGGCGACGGTGGACGATCTGGCA…	O=C(NC(C(C)C)C(O)CC1=O)C(CSSCC/C=C/C2O1)NC(C(NC(C2)=O)CCSC)=O	['Structure-based inference']	['pubmed:21348454', 'pubmed:22091906', 'pubmed:24589486']	Burkholderia
BGC0001014	NRP_Polyketide	Ralstonia solanacearum GMI1000	micacocidin	nrpspksdomains_RSc1806_AMP-binding.1	cysteine	cys	FFDQAARQPQAPALIANDLTWTYAQLAGWSRRLANGLAQAGVQRGDRVAVVMRKGAEQVAACLGIQAAGGAYVPVDAQTPAARLHAILQGSRIRVALTQADCLPIVRELTQALDVRVIDASHDAVAGWPDAPPTVARDPLDPAYVIYTSGSTGTPKGVLIDHRGAVNTVLDINRRFGITAGDRVLGLSALYFDLSVYDLFGSFAAGGTLVLPQPGGVRDPAHWLALATRHGVTVWNSVPALLELLLDEAEAAGQTLPGIGHVFLSGDWIPLHLPARLRALAPAARLIAMGGATEASIWSNWFRVDEVPAHWHSIPYGYPLGNQRYRVLDTHLRDCPDHVTGDLCIGGIGLALGYENDPERTAASFFHHPLDGERLYRTGDLARYWPDGTLEFLGRRDFQ…	TTCTTCGACCAGGCAGCGCGCCAGCCGCAGGCGCCGGCCCTGATCGCCAACGACCTCACCTGGACCTACGCACAACTGGCCGGCTGGTCCCGCCGCCTCGCCAACGGCCTCGCGCAGGCCGGCGTGCAGCGCGGTGACCGCGTGGCGGTGGTGATGCGCAAGGGCGCGGAGCAGGTCGCCGCCTGCCTGGGCATCCAGGCCGCGGGCGGCGCCTATGTGCCGGTCGATGCGCAGACCCCGGCCGCGCGCCTGCACGCCATCCTGCAAGGCAGCCGCATCCGCGTCGCGCTGACGCAGGCCGACTGCCTGCCGATCGTGCGCGAGCTGACGCAGGCGCTCGACGTGCGCGTCATCGATGCCTCGCACGACGCGGTCGCCGGCTGGCCGGACGCCCCGCCC…	OC1=C(C2=N[C@]([C@@]3([H])SC[C@]([C@@H](O)C(C)(C)C4=N[C@](C(O)=O)(C)CS4)([H])N3C)([H])CS2)C(CCCCC)=CC=C1	['Structure-based inference']	['pubmed:21724891', 'pubmed:23790487', 'pubmed:24202877']	Ralstonia
BGC0001014	NRP_Polyketide	Ralstonia solanacearum GMI1000	micacocidin	nrpspksdomains_RSc1811_AMP-binding.1	cysteine	cys	FFRQAVAQPHALACATAHASETYAGLAARALAHVRTLREAGVMPGDLVACAMPKGIPALAAAIGIVAAGAVLVPLASDMPPARMQAILDGAGVKAAFIAQADFTRPACASPVAWLVSPESEPAVYASAALQREIDAHVASPALDALAYIIYTSGSTGTPKGVAITHGAAGNTLEAVHALLGLTPDDRVFGISALGFDLAIYDVFGMLSRGGAVILPDEAGMRDAAHWLDLAHRYGVTVWNSVPALLAMLVERAASSGRGLPASLRWVMLSGDWIALDLPARLRALAPHTRLAALGGATEAAIWSNWFEVGRVDPAWRSIPYGFPLANQSYRVLDAHLRDCPDWVDGDLHIGGAGLASCYWRDPQRTAEAFITHPASAERLYRTGDRARYWPDGCIEFLG…	TTCTTCCGGCAGGCGGTGGCGCAGCCGCACGCGCTGGCCTGCGCCACCGCCCATGCCAGCGAGACCTATGCCGGACTGGCCGCCCGCGCGCTGGCGCACGTGCGCACGTTGCGCGAGGCGGGCGTCATGCCCGGCGATCTCGTTGCCTGCGCCATGCCCAAGGGCATTCCCGCGCTCGCCGCCGCCATCGGCATCGTCGCGGCGGGCGCGGTGCTGGTGCCGTTGGCCAGCGACATGCCCCCGGCGCGCATGCAAGCCATTCTCGATGGCGCAGGTGTCAAAGCCGCCTTTATCGCGCAGGCGGACTTCACGCGGCCGGCATGCGCCAGCCCCGTCGCGTGGCTGGTGTCGCCGGAGTCCGAGCCGGCCGTGTACGCAAGCGCCGCGCTGCAGCGGGAG…	OC1=C(C2=N[C@]([C@@]3([H])SC[C@]([C@@H](O)C(C)(C)C4=N[C@](C(O)=O)(C)CS4)([H])N3C)([H])CS2)C(CCCCC)=CC=C1	['Structure-based inference']	['pubmed:21724891', 'pubmed:23790487', 'pubmed:24202877']	Ralstonia
BGC0001102	NRP_Polyketide	Burkholderia thailandensis E264; ATCC 700388	malleilactone	nrpspksdomains_BTH_II2088_AMP-binding.1	propionic acid	bz	REHVARTPDALALKDGERTWTYRQLASHAGELADAFRAAGVGRQDVVGVFLPHGAEYVLTIVAAWSIGASVCLLEKSWPDSLVGEFVASCRVAQFATTPELLARAAKHLPDARCTLVGARPPLADRAWASVAPRPDDIAFVSLTSGSTGKPKAVLTTHIGTSYCFHARDALYPYADGEREGLNVFLAWECLRPLMFGRPAVVIGDDVIFDPPRLVALLRRERITRLVVTPSLLESVLDFPGVAAQLRDALAHMSAWFLMGEVMPPRVVDKARAAFPPSVRLVNAYSTWESLDVCYADLLPSRASDGSRRVPIGRPLPGCALAVLDDAGRAVPAGETGELHIASPGLGPGYLDDAARTAEKFLPSAPALAERGHDAPVYRTGDRARLLPDGQISILGRID…	CGCGAGCACGTCGCGCGCACCCCCGATGCGCTCGCGCTGAAGGACGGCGAACGCACGTGGACGTACCGGCAACTCGCATCGCATGCGGGCGAGCTCGCCGACGCGTTTCGCGCGGCGGGCGTCGGCCGGCAGGATGTGGTCGGCGTCTTTCTGCCGCACGGCGCCGAGTATGTGCTGACGATCGTCGCCGCATGGTCGATCGGCGCGTCGGTATGCCTGCTCGAAAAGAGCTGGCCCGATTCGCTCGTCGGCGAATTCGTCGCGAGCTGCCGCGTCGCGCAGTTCGCGACGACGCCCGAGTTGCTCGCGCGCGCGGCCAAACATCTGCCCGATGCGCGCTGCACGCTCGTCGGCGCGCGCCCGCCGCTCGCGGACCGCGCATGGGCGAGCGTCGCGCCG…	CCCCCCC\C=C(/C)\C(\O)=C1/C=C(OC1=O)C(=O)CC	['Structure-based inference']	['pubmed:32314848', 'pubmed:31353766', 'pubmed:23055407', 'pubmed:22765305']	Burkholderia
BGC0001112	NRP_Polyketide	Paraburkholderia rhizoxinica	rhizoxin A	nrpspksdomains_rhiB_AMP-binding.1	serine	ser	MERSVELIIALLAIMKAGGAYLPLDPGYPDERLALIIDDAAVTVLLTQQRFRSRLAGYDGEVLCLDDANQQALFGDEANPVPINGPDDLAYIIYTSGSTGRPKGCMLPHKAICNRLLWMQRHYEVGAADRILQKTPFTFDVSVWELFLPLLSGACLVMAKPEGHKDAHYLVEVIQAEQITICHFVPSMLRFFLKHPAVSECISLQKVFVSGEALTHDLLLQFRQLLSAELHNLYGPTEAAVDVTYWRGEPREDQLVPIGRPIDNIQIYILDSEAKPVPIGETGELCIGGLGLARGYLNRPELTAEKFIRDPFSGEAGARLYRTGDKARFLSNGEIELLGRFDSQVKLR	ATGGAGCGATCAGTAGAGCTAATCATTGCGCTACTGGCGATCATGAAGGCCGGTGGTGCTTATTTGCCGCTGGACCCCGGCTATCCCGATGAGCGATTGGCGTTGATCATTGACGACGCTGCGGTGACAGTGTTGCTGACGCAACAGCGTTTTCGTAGTCGGCTAGCGGGATATGACGGCGAAGTGCTTTGCTTGGACGATGCTAATCAGCAAGCGCTGTTTGGCGATGAGGCCAATCCTGTGCCAATCAATGGTCCCGATGATCTTGCCTATATCATCTATACGTCGGGCTCTACCGGCCGGCCTAAAGGCTGCATGCTGCCGCATAAGGCAATCTGTAATCGCCTGCTGTGGATGCAGCGCCATTATGAGGTTGGCGCAGCCGATAGGATCTTACAA…	C[C@@H]1/C=C/[C@@H]2[C@](O2)([C@H](C[C@H](OC(=O)[C@H]3[C@@H](O3)C[C@@H]4C[C@H]1OC(=O)C4)[C@H](C)[C@H](/C(=C/C=C/C(=C/C5=COC(=N5)C)/C)/C)OC)O)C	['Structure-based inference']	['pubmed:17154220', 'pubmed:19266509', 'pubmed:22915379', 'pubmed:24048471', 'pubmed:25214315']	Mycetohabitans
BGC0001189	NRP	Cupriavidus taiwanensis LMG 19424	taiwachelin	nrpspksdomains_RALTA_B1226_AMP-binding.1	aspartic acid	asp	AHWASERPHAPALSAPGLQLTYAGLARAVDAVARQLPALGLRPGQPVGLLLPRSGELVVALLAVMRAGAPYLPLDPAWPPQRRAQILADAGATLVLTDAAHACTAGPLPHAEIAALLAADTAADATADATDTLPTVDAAQPAYVLYTSGSTGTPKGVAINHGQLLNYAAASGQALRLDRCQRFGLTSTVAADLGNTTLFGALWHGACLCVADEADMRHAAAFTAFLAREHVDCLKIVPSHLDALLDGDTAPLPLPPHATIVLGGEAAATALLQRLHARMPQARLCNHYGPTETTVGILFHDAGRAADAVDAPLPLTQVLANCEAYVRTATGNLAAAGETGELWLGGAQLCAGYLGGEVSGTAFVAHPERPGQRLYRSGDLARYLPSGGIELVGRADHQI…	GCCCACTGGGCCAGCGAGCGCCCGCATGCGCCGGCGTTGTCGGCCCCTGGCCTGCAGCTTACCTACGCCGGCCTCGCCCGCGCCGTGGACGCAGTGGCGCGGCAGTTGCCGGCACTGGGCTTGCGCCCGGGCCAGCCGGTCGGCCTGCTGTTGCCGCGTTCGGGCGAACTGGTGGTGGCATTGCTGGCGGTGATGCGTGCCGGTGCGCCGTACCTGCCGCTCGATCCGGCATGGCCGCCGCAACGGCGCGCGCAGATCCTGGCCGACGCCGGTGCCACGCTGGTGCTGACCGACGCGGCCCATGCGTGTACCGCCGGGCCGCTGCCGCATGCCGAGATCGCGGCACTGCTGGCGGCCGACACTGCCGCCGACGCCACCGCCGACGCCACCGACACGCTG…	CCCCCCCCCCCC(=O)N[C@@H]([C@@H](C(=O)O)O)C(=O)N[C@H]([C@@H](C)O)C(=O)N[C@@H](CC(=O)O)C(=O)N[C@H](CCCN(C(=O)C[C@H](C)O)O)C(=O)N[C@@H](CO)C(=O)N[C@H]1CCCN(C1=O)O	['Structure-based inference', 'Sequence-based prediction']	['pubmed:22972004']	Cupriavidus
BGC0001189	NRP	Cupriavidus taiwanensis LMG 19424	taiwachelin	nrpspksdomains_RALTA_B1227_AMP-binding.1	threonine	thr	QRHAEQQPQAVALRHGHTTLTYGELERRANRLAHRLIALGVGPEVRVGIAMERSPEMIVGLLAILKAGGAYVPFDPAYPAERLAYLFEDSGIAALLTQPALRGLLPQRDGLPVLELDSQDDGAEWPEHAPTVEVRHEHLAYVIYTSGSTGRPKGAQLQHGNLSRLLAATQHWFGFGPADVWTLFHSYAFDFSVWEIFGALCHGGQLVIVPFHVSRAPQEFIALLQRERVTVLNQTPSAFRALLTQPELYGAPLALRYVIFGGEALDPQALRPWVDRFGDASPQLVNMYGITETTVHVTYRPITRADLDPSSRARSPIGERIPDLGVRVLDAGLNLVPPGVAGELYIAGDGLARGYLNRPGLTAERFVPDPFAGDGARLYRTGDLARWLPDGQLEYLGRI…	CAGCGCCATGCCGAACAACAGCCGCAAGCCGTTGCCCTGCGCCATGGCCACACCACGCTGACCTATGGCGAACTGGAGCGGCGCGCGAACCGGCTGGCGCACCGGCTGATCGCGCTCGGCGTCGGCCCCGAAGTGCGCGTCGGCATTGCCATGGAGCGTTCGCCGGAGATGATCGTCGGCCTGCTCGCCATCCTGAAGGCCGGCGGCGCCTATGTGCCCTTCGACCCCGCCTATCCCGCCGAGCGCCTGGCCTACCTGTTCGAGGACAGCGGCATTGCCGCCTTGCTGACCCAGCCCGCGCTGCGCGGCCTGCTGCCGCAGCGCGATGGCCTGCCGGTGCTGGAACTCGACTCGCAGGACGACGGCGCTGAGTGGCCGGAACACGCGCCCACGGTCGAA…	CCCCCCCCCCCC(=O)N[C@@H]([C@@H](C(=O)O)O)C(=O)N[C@H]([C@@H](C)O)C(=O)N[C@@H](CC(=O)O)C(=O)N[C@H](CCCN(C(=O)C[C@H](C)O)O)C(=O)N[C@@H](CO)C(=O)N[C@H]1CCCN(C1=O)O	['Structure-based inference', 'Sequence-based prediction']	['pubmed:22972004']	Cupriavidus
BGC0001189	NRP	Cupriavidus taiwanensis LMG 19424	taiwachelin	nrpspksdomains_RALTA_B1227_AMP-binding.2	aspartic acid	asp	FEAHAASTPDAVALAADDVQLTYRELNRRANVLAHRLAARGVGPDVRVGVLAERSVEMVVALLAVLKAGGAYVPFDPDYPADRLAYMIEDSGVALVLVQRPDAIAPLPAAVPVLDLGTPALYDGKHANPSPALHPHHLAYVIYTSGSTGRPKGVGIAHGALAHYLQGVLSQLALAPASRMAMVSTPAADLGHTVLFGALASGGALHLPARRCVFDAAAFARYMTQHRIGVLKIVPGHLGALLDGAQAAGVPLADVLPDHTLVLGGEATDAALRARLHAARPACRLVNHYGPTETTVGVLVHVAGTTPQPGLGLPLGQPLRGTGAYVMDAALCPLPDGIAGELYVGGPALARGYLGRAALTADRFVPDPLAGDGARLYRTGDRVRRRADGVFEYLGRVDD…	TTCGAAGCCCATGCGGCCTCGACACCGGATGCCGTGGCGCTGGCGGCGGACGACGTGCAACTCACCTACCGGGAACTCAATCGCCGCGCTAATGTCCTCGCGCATCGCCTGGCCGCACGGGGCGTGGGACCGGACGTGCGTGTTGGCGTGCTGGCCGAGCGTTCGGTCGAAATGGTCGTCGCCCTGCTGGCCGTCCTCAAGGCTGGTGGCGCCTACGTGCCGTTCGATCCCGACTATCCCGCCGACCGCCTGGCCTACATGATCGAGGACAGCGGCGTGGCGCTGGTCCTGGTGCAGCGGCCAGATGCCATCGCGCCCTTGCCAGCGGCCGTGCCGGTGCTCGACCTGGGCACGCCAGCCTTGTATGACGGCAAGCACGCCAACCCATCGCCGGCGCTG…	CCCCCCCCCCCC(=O)N[C@@H]([C@@H](C(=O)O)O)C(=O)N[C@H]([C@@H](C)O)C(=O)N[C@@H](CC(=O)O)C(=O)N[C@H](CCCN(C(=O)C[C@H](C)O)O)C(=O)N[C@@H](CO)C(=O)N[C@H]1CCCN(C1=O)O	['Structure-based inference', 'Sequence-based prediction']	['pubmed:22972004']	Cupriavidus
BGC0001189	NRP	Cupriavidus taiwanensis LMG 19424	taiwachelin	nrpspksdomains_RALTA_B1228_AMP-binding.1	ornithine	orn	ARHAAARPDAVAVICDEQVLRYGELLARADRLAAVLHARGIGAEHRVGIALSRSPDLIVALLAVMRCGAAYVPFDPAYPKDRLAYLFDDSAIRLLVTEPALLDALPAPAALPVLTLDAVDDAIAPLPEQPIHPGQLAYVIYTSGSTGRPKGVCVAHGPLAMHVAATIDAYEMGPHSRELHFLSFAFDGAHERWLCALACGGSLLLRDDALWTPEQTAAAMTRHGVTNAGFPPAYLRQLAEYCEQSGARPPVALYSFGGEAMPRAAFAQARRALAPRTFVNGYGPTETVVTPMVWKVRADAPEADFAGTYAPIGRPVGARRCYLLDAELNLVPPGVAGELYIGGEGLARGYLNKGGMTAERFVPDPFAGDGARLYRTGDLARWLPDGQLEYLGRIDQQLK…	GCCCGCCACGCGGCGGCCCGCCCCGACGCCGTCGCCGTGATCTGCGACGAGCAGGTGTTGCGCTACGGCGAGCTGCTGGCCCGCGCCGACCGCCTCGCCGCCGTGCTGCATGCGCGCGGCATCGGCGCGGAACATCGCGTCGGCATCGCCCTGTCGCGCTCGCCCGACCTGATCGTCGCGCTGCTGGCGGTGATGCGCTGCGGCGCCGCCTACGTGCCGTTCGATCCCGCCTATCCGAAGGACCGCCTTGCCTACCTGTTCGACGACAGCGCCATCCGGCTGCTGGTCACCGAGCCGGCGCTGCTGGATGCCTTGCCCGCGCCGGCCGCGCTGCCAGTGCTGACGCTGGATGCGGTCGACGATGCCATCGCGCCGCTGCCCGAGCAGCCCATCCACCCC…	CCCCCCCCCCCC(=O)N[C@@H]([C@@H](C(=O)O)O)C(=O)N[C@H]([C@@H](C)O)C(=O)N[C@@H](CC(=O)O)C(=O)N[C@H](CCCN(C(=O)C[C@H](C)O)O)C(=O)N[C@@H](CO)C(=O)N[C@H]1CCCN(C1=O)O	['Structure-based inference', 'Sequence-based prediction']	['pubmed:22972004']	Cupriavidus
BGC0001189	NRP	Cupriavidus taiwanensis LMG 19424	taiwachelin	nrpspksdomains_RALTA_B1228_AMP-binding.2	serine	ser	FEARVAGQPDAIALCFGEERLTYAALNRRANALAHRLIEQGVGPDVPVGVLAERSVEMVVALLAILKAGGAYVPFDPDYPADRLAYMIEDSGVALVLVQRPDAMPALPRAVAAVDLTDPALYAQGGERNPTPALSPEHLAYVIYTSGSTGRPKGAGNRHGALHNRLWWMQAQYRLDGDDTVLQKTPFSFDVSVWEFFWPLMTGARLALAAPGDHRDPQRIAALIAQHRVTTLHFVPAMLQAFVADSTVAAACASLRHIVCSGEALPADLARRTMNLLPQAGLHNLYGPTEAAIDVTHWTCRDDGGHAVPIGRPIANVSAHVLDGAMHPVPDGIAGELYLGGAGLARGYLGRAALTAERFVADPHGAPGERLYRTGDLARRRADGPIEYLGRLDHQVKIR	TTCGAAGCCCGCGTGGCCGGGCAGCCCGATGCGATCGCGCTGTGCTTCGGCGAAGAACGCCTGACCTATGCGGCGCTGAATCGCCGCGCCAATGCGCTCGCGCATCGACTGATCGAGCAAGGGGTGGGCCCGGACGTGCCGGTGGGCGTGCTGGCCGAGCGTTCGGTCGAAATGGTCGTCGCCCTGCTCGCCATCCTCAAGGCCGGCGGCGCCTACGTGCCATTCGATCCGGACTATCCCGCCGACCGCCTGGCCTACATGATCGAGGACAGCGGCGTGGCGCTGGTGCTGGTGCAGCGCCCCGACGCGATGCCGGCGCTGCCCCGCGCCGTTGCCGCCGTCGACCTGACCGATCCGGCGCTCTATGCACAGGGCGGCGAGCGCAATCCGACCCCCGCG…	CCCCCCCCCCCC(=O)N[C@@H]([C@@H](C(=O)O)O)C(=O)N[C@H]([C@@H](C)O)C(=O)N[C@@H](CC(=O)O)C(=O)N[C@H](CCCN(C(=O)C[C@H](C)O)O)C(=O)N[C@@H](CO)C(=O)N[C@H]1CCCN(C1=O)O	['Structure-based inference', 'Sequence-based prediction']	['pubmed:22972004']	Cupriavidus
BGC0001189	NRP	Cupriavidus taiwanensis LMG 19424	taiwachelin	nrpspksdomains_RALTA_B1228_AMP-binding.3	ornithine	orn	ARHAAARPDAVAVICDEQVLRYGELLARADRLAAVLHARGIGAEHRVGIALSRSSDLIVALLAVMRCGAAYVPFDPAYPKDRLAYLFDDSAIRLLVTEPALLDALPAPAALPVLTLDAVAEDIAPLPEQPIHPGQLAYVIYTSGSTGRPKGVCVAHGPLAMHVAATIDAYEMGPHSRELHFLSFAFDGAHERWLCALACGGSLLLRDDALWTPEQTAAAMTRHGVTNAGFPPAYLRQLAEYCEQSGARPPVALYSFGGEAMPRAAFAQARRALAPRTFINGYGPTETVVTPMVWKVRADAPEADFAGTYAPIGRPVGARCCYLLDAELNLVPPGVAGELYIGGDGLARGYLNKGGMTAERFVPDPFAGDGARLYRTGDLARWLPDGQLEYLGRIDQQLK…	GCCCGCCACGCGGCGGCCCGCCCCGACGCCGTCGCCGTGATCTGCGACGAGCAGGTGTTGCGCTACGGAGAGCTGCTGGCCCGCGCCGACCGCCTCGCCGCCGTGCTGCATGCGCGCGGCATCGGCGCGGAACATCGCGTCGGCATCGCCCTGTCGCGCTCGTCCGACCTGATCGTCGCGCTGCTGGCGGTGATGCGCTGCGGCGCCGCCTACGTGCCGTTCGATCCCGCCTATCCGAAGGACCGGCTGGCTTATCTGTTCGACGACAGCGCCATCCGGCTGCTGGTCACCGAGCCGGCGCTGCTGGATGCCTTGCCCGCGCCGGCCGCGCTGCCAGTGCTGACGCTGGATGCGGTGGCCGAGGACATCGCGCCGCTGCCCGAGCAGCCCATCCACCCC…	CCCCCCCCCCCC(=O)N[C@@H]([C@@H](C(=O)O)O)C(=O)N[C@H]([C@@H](C)O)C(=O)N[C@@H](CC(=O)O)C(=O)N[C@H](CCCN(C(=O)C[C@H](C)O)O)C(=O)N[C@@H](CO)C(=O)N[C@H]1CCCN(C1=O)O	['Structure-based inference', 'Sequence-based prediction']	['pubmed:22972004']	Cupriavidus
BGC0001363	NRP_Polyketide	Ralstonia solanacearum GMI1000	ralsolamycin	nrpspksdomains_RSp0641_AMP-binding.1	threonine	thr	FEAQVRRTPEAIAVEHEGWRVSYAELNARANRVAHALIGLGVGPDARVGLCAERSVELVIGLLGILKAGGGYVPLDPSYPRDRLAYMLEDSAPVAVLAQSNTREPLGALSVPVLDLENPLEGEAEHDPQVTGLEPNHLAYVIYTSGSTGQPKGVLVEHRQVARLFTSTQPWFGFGAEDVWTLFHSFAFDFSVWELFGALLHGGRLVVVPKLTARSPQAFYALLCEAGVTVLNQTPSAFRQLMAAQQEAPAARHRLRQVILGGEALEVGALRPWYERAENAGTQLANMYGITETTVHVSYRALEAADAQGTGSPIGRRIPDLRVYVLDAHGEPVPVGVTGEMYIGGAGVARGYLNRPELTAERFVVNPFHGEGRERMYRTGDLGRWLPDGSLEYQGRADA…	TTCGAGGCCCAGGTTCGCCGCACGCCGGAAGCGATTGCGGTGGAGCACGAAGGCTGGCGGGTGAGCTACGCGGAATTGAACGCACGGGCCAACCGTGTGGCGCACGCGCTGATCGGTTTGGGTGTGGGCCCGGATGCCCGAGTGGGCCTGTGCGCGGAGCGCAGCGTAGAGCTTGTGATCGGGCTGCTTGGGATATTGAAGGCAGGCGGAGGTTATGTGCCGCTGGACCCATCGTATCCCCGGGATCGTCTGGCGTACATGCTGGAGGACAGCGCCCCGGTGGCGGTGCTGGCGCAGTCGAACACACGCGAGCCGTTGGGGGCACTGTCGGTGCCGGTGTTGGATCTGGAGAACCCGCTGGAAGGCGAGGCCGAGCACGATCCGCAGGTGACGGGCCTG…		['Structure-based inference', 'Sequence-based prediction']	['pubmed:26943626']	Ralstonia
BGC0001363	NRP_Polyketide	Ralstonia solanacearum GMI1000	ralsolamycin	nrpspksdomains_RSp0641_AMP-binding.2	tyrosine	tyr	FEAQVMRTPDAVALKHADQQVSYRELDARANRLAHHLRELGVAADVLVGLCVDRSIEMIVGLLGILKAGGAYVPLDPDYPQARLAYIFQDAMLSVLVSKRALAQRLPIAWTQVVELDDAEPAWADYPPTPPQVQGEPGQLAYVIYTSGSTGQPKGVAVTHQGVASLVYSQCERFGVSSQSRVLQFASISFDAAVSEIGMGLLCGACLVLAPAQALMPGAALTHLLDRERITHVTLPPAVLALMPEQALPADCHLIVAGEACPPSLVRLWSEGRTMINAYGPTEATVCATMSRALTAQDAPSIGGPIGNVRVYVLDAYLQPVPVGVTGELYIAGSGLARGYWQRAGLTAERFMANPFALGERMYRTGDLGRWLPDGSLEYQGRADAQVKLR	TTCGAGGCCCAGGTCATGCGCACCCCCGACGCCGTGGCGCTCAAGCACGCAGACCAGCAGGTGAGCTACCGCGAGCTGGACGCCCGGGCCAACCGCCTGGCCCATCATCTACGGGAGCTGGGCGTGGCGGCCGATGTGCTGGTGGGGCTGTGCGTCGACCGTTCGATCGAGATGATCGTGGGGCTGCTGGGTATCCTCAAGGCCGGCGGCGCGTATGTGCCGCTGGACCCGGATTATCCGCAGGCGCGCCTGGCCTACATCTTCCAGGACGCGATGCTGTCCGTGCTGGTCAGCAAGCGGGCGCTGGCACAGCGGCTGCCGATCGCCTGGACGCAGGTCGTCGAGCTCGATGACGCGGAGCCGGCCTGGGCCGACTATCCCCCGACGCCGCCGCAGGTC…		['Structure-based inference', 'Sequence-based prediction']	['pubmed:26943626']	Ralstonia
BGC0001363	NRP_Polyketide	Ralstonia solanacearum GMI1000	ralsolamycin	nrpspksdomains_RSp0641_AMP-binding.3	serine	ser	FEAQVRRTPEAIAVVHEGQQVSYAELNARANRVAHALRRLGVGPDARVGLCAERSVELVVGLLGILKAGGGYVPLDPSYPQDRLTYMLEDSAPVAVLTQSNTREQLGALSVPVLDLDGPLEEAEHDPQVTGLEPHHLAYVIYTSGSTGRPKGVMNEHRGVVNRLWWAQQTYRLDASDRVLQKTPFGFDVSVWELFWPLLAGARLVMARPEGHKDPAYLAATIEQAGITTLHFVPSMLQLFLDQVEAGRCQGLRRMLCSGEALSHALQQRSLARFPHSELHNLYGPTEAAIDVTAWRCNAEIHPGVVPIGRPIANTQMYVLDGHQQPVPLGVTGEIYIGGIGVARGYLNRPELTAERFVVNPFHGEGRERMYRTGDLGRWLPDGSLAYQGRADAQVKLR	TTCGAGGCCCAGGTTCGCCGCACGCCGGAAGCGATCGCGGTGGTGCACGAAGGCCAACAGGTGAGCTACGCGGAACTGAACGCACGGGCAAACCGTGTGGCACATGCGCTGAGGCGTCTGGGCGTAGGCCCGGATGCCCGAGTGGGTCTGTGCGCGGAGCGAAGCGTGGAACTGGTGGTCGGGCTGCTGGGGATATTGAAGGCAGGCGGAGGATACGTGCCGCTGGACCCGTCATATCCGCAGGATCGTCTGACCTACATGCTGGAGGACAGCGCCCCGGTGGCAGTGCTGACGCAGTCGAACACACGCGAGCAGTTGGGGGCACTGTCGGTGCCAGTGCTGGACCTGGATGGACCGTTGGAGGAAGCCGAACACGATCCGCAGGTGACGGGCCTGGAA…		['Structure-based inference', 'Sequence-based prediction']	['pubmed:26943626']	Ralstonia
BGC0001363	NRP_Polyketide	Ralstonia solanacearum GMI1000	ralsolamycin	nrpspksdomains_RSp0641_AMP-binding.4	homoserine	ser	FEAQVRRTPEAIAVEHEGQQVSYAELNARANRVAHALRRLGVGPDARVGLCAERSVELVVGLLGILKAGGGYVPLDPSYPQDRLAYMLEDSAPVAVLAQSNTREQLGALSVPVLDLDRPLLEEAEHDPQVTGLEPHHLAYVIYTSGSTGRPKGVMVEHRGLSNLLDWYLEDLGLRSDDTVLLVSSYSFDLTQKNILGPLLAGGRLHLAGPFVPDALVAQIRREGITHINLSPSAFHALIDAAGAEGLGGLRRVVLGGEPIQPARLQGLPEPRPRFINSYGPTECSDVVAWHALDAELDRYRAASVPLGRSVRNVRLYVLDAHRQPVPTGVAGEIYVGGAGVGRGYRNLPELTGACFLADPFHGEGQARMYKTGDLGRWLANGSLEYLGRSDDQVKLR	TTCGAGGCCCAGGTTCGCCGCACGCCGGAGGCGATCGCGGTAGAGCACGAAGGCCAACAGGTGAGCTACGCGGAACTGAACGCACGGGCAAACCGTGTGGCACATGCGCTGAGGCGTCTGGGCGTAGGTCCGGATGCCCGAGTGGGTCTGTGCGCGGAGCGAAGCGTCGAGCTGGTGGTCGGGCTGCTGGGAATCCTGAAGGCAGGCGGAGGATACGTGCCGCTGGACCCGTCATATCCGCAGGATCGTCTGGCCTACATGCTGGAGGACAGCGCCCCGGTGGCCGTGCTGGCGCAGTCGAACACACGCGAGCAGTTGGGGGCACTGTCGGTGCCGGTGTTGGACCTGGATAGACCGCTGTTGGAGGAAGCCGAACACGATCCGCAGGTGACGGGCCTG…		['ATP-PPi exchange assay', 'Structure-based inference']	['pubmed:26943626']	Ralstonia
BGC0001363	NRP_Polyketide	Ralstonia solanacearum GMI1000	ralsolamycin	nrpspksdomains_RSp0642_AMP-binding.1	valine	val	FEAQVVRAPEAIAIEQGERQLSYRALNALANRLAWRLREAGVKPGDRVAILLERSIELVASELAILKCGAVYVPLDCNAPQARLRFLLEDVEAALLLTASGLDVPVLAGLRRLDVDGAAGNSAVDADLPPVPGGEAAAYVLYTSGSTGLPKGVVVPHRAISRLVLNNGYAAFCADDRMAFASNPAFDASTLDVWVPLLNGGRVVIIDQPTVLAPERFAQALRRGQVSVLWMTAGQFHQYAPSLIGVFPQLRYLMVGGDVLDPATIAMVLREGAPQHLLNGYGPTETTTFATTHLIQAVAAGRGIPIGRPIANTQIYVLDAYQQPVPLGVTGEIYVGGAGVGLGYLNRPELTAERFVVNPFHGEGRERMYKTGDLGRWLPDGSLEYQGRTDAQVKLR	TTTGAGGCGCAGGTTGTCCGCGCGCCCGAGGCCATCGCCATCGAACAGGGCGAGCGGCAACTGAGCTACCGCGCATTGAATGCGCTCGCCAACCGGCTGGCCTGGCGCCTGCGCGAAGCGGGCGTGAAGCCCGGTGACCGGGTGGCGATCCTGCTCGAGCGCTCCATCGAACTGGTCGCGAGTGAACTGGCCATCCTCAAATGCGGTGCCGTCTATGTGCCGCTGGACTGCAATGCGCCTCAGGCGCGTCTGCGCTTCCTGCTGGAGGACGTCGAGGCCGCTCTGCTGCTGACCGCAAGCGGGCTGGATGTCCCCGTGCTGGCTGGCCTGCGTCGGCTCGATGTCGATGGCGCCGCAGGCAACAGTGCCGTCGATGCCGATCTGCCGCCGGTGCCGGGC…		['Structure-based inference', 'Sequence-based prediction']	['pubmed:26943626']	Ralstonia
BGC0001363	NRP_Polyketide	Ralstonia solanacearum GMI1000	ralsolamycin	nrpspksdomains_RSp0642_AMP-binding.2	serine	ser	FEAQVRRTPEAIAVEHEGRQVSYAELNARANRVAHALIGLGVGPDARVGLCAGRSVELVVGLLGILKAGGGYVPLDPSYPQDRLTYMLEDSAPVAVLTQGLVREQLGMLSVPVLDLDGPQEDAEHDPQVEALKPHHLAYVIYTSGSTGRPKGVMNEHRGVVNRLWWAQQTYRLDASDRVLQKTPFGFDVSVWELFWPLLAGARLVMARPEGHKAPAYLAATIEQAGITTLHFVPSMLQLFLDQVEAGRCQGLRRMLCSGEALPHALQQRSLARFPHSELHNLYGPTEAAIDVTAWRCNAEIHPGVVPIGRPIANTQIYVLDAYRQPVPLGVTGEIYIGGAGVARGYLNRPELTAERFVVNPFHGEGRERMYRTGDLGRWLPDGSLEYQGRADAQVKLR	TTCGAGGCCCAGGTTCGCCGCACGCCAGAGGCGATCGCGGTAGAGCACGAAGGCCGGCAGGTGAGCTACGCGGAGTTGAACGCGCGGGCAAACCGCGTGGCACACGCGCTGATCGGCTTGGGTGTCGGCCCGGATGCGCGGGTGGGTCTGTGCGCGGGGCGAAGCGTGGAACTGGTGGTCGGGCTGCTGGGAATCCTGAAGGCAGGCGGAGGATACGTGCCGCTGGACCCGTCATATCCGCAGGATCGTCTGACCTACATGCTGGAGGACAGCGCCCCGGTGGCCGTGCTGACGCAGGGGCTGGTGCGGGAGCAATTGGGCATGCTGTCGGTGCCAGTGCTGGACCTGGATGGACCGCAGGAGGACGCCGAGCACGATCCGCAGGTCGAGGCATTGAAG…		['Structure-based inference', 'Sequence-based prediction']	['pubmed:26943626']	Ralstonia
BGC0001363	NRP_Polyketide	Ralstonia solanacearum GMI1000	ralsolamycin	nrpspksdomains_RSp0642_AMP-binding.3	glycine	gly	EAQAARTPEAIAVEHGASTLSYRELDSQANRLAHRLIARGVVPDARVGLCVERGLPMVIGVLGILKAGGSYVPLDPSYPRDRLAYMLEDSAPVAVVAQSGTRDRLGDRPVAVVDLDEASWQAEPSHRPEVAGLSSHHAAYVIYTSGSTGRPKGVTVEHRQVVNLLESMRGLLAMTEADRWPAVTTLGFDIAGLELYLPLISGAVVIVLDREVSRNAQSLSAALEGSGATVMQATPSTWRLLLESGWSGRPGLKALCGGEALPGELAGRLRARVGRLWNVYGPTETTIWSSAREVDATDAGQGVVPIGRPIANTQMYVLDAYRQPVPLGVTGEVYIGGAGVARGYLNRPELTAERFVENPFHGEGRERMYRTGDLGRWLPDGSLEYQGRADAQVKLR	GAGGCCCAGGCGGCCCGCACGCCGGAGGCGATCGCGGTGGAGCACGGCGCATCGACGCTGAGCTACCGGGAGCTGGACAGCCAGGCGAACCGCCTGGCGCATCGGCTGATCGCGCGGGGTGTGGTCCCGGATGCGCGGGTGGGGCTGTGCGTGGAGCGCGGGCTGCCGATGGTGATCGGCGTGCTGGGGATCCTGAAGGCGGGCGGGAGCTACGTGCCGCTGGACCCGTCGTATCCGCGGGATCGGCTGGCGTACATGCTGGAGGACAGCGCACCGGTGGCGGTGGTGGCGCAGTCGGGCACGCGGGATCGTCTGGGCGATCGGCCGGTGGCGGTGGTCGACCTGGACGAGGCGAGCTGGCAGGCCGAGCCATCGCATCGGCCGGAGGTGGCGGGGCTG…		['Structure-based inference', 'Sequence-based prediction']	['pubmed:26943626']	Ralstonia
BGC0001363	NRP_Polyketide	Ralstonia solanacearum GMI1000	ralsolamycin	nrpspksdomains_RSp0642_AMP-binding.4	alanine	ala	FEAQVRRTPEAIAVVHEGQQVSYAELNARANRVAHALRRLGVGPDARVGLCAERSVELVIGLLGILKAGGGYVPLDPSYPQDRLAYMLEDSAPVAVLAQSNTREQLGALSVPVLDLDGPLEEAEHDPQVTGLEPHHLAYVIYTSGSTGRPKGVVVEHRNTVNFLAWAARAFPPASLARTLFSTSLNFDLSVFECFAPLTTGGRIDIVVNVLALGDGTHDVRLINTVPSALSALLESSGLDPAVEVVNVAGEALKRELVERLFAQTQARRLYNLYGPSETTTYSSWVCMDRQTGFQAHIGRPIANTQIYVLDAYRQPVPLGVTGEIYIGGAGVARGYLNRPELTAERFVVNPFHGEGRERMYRTGDLGRWLPDGSLEYQGRADAQVKLR	TTCGAGGCCCAGGTTCGCCGCACGCCAGAGGCGATCGCGGTGGTGCACGAAGGCCAACAGGTGAGCTACGCGGAACTGAACGCACGGGCAAACCGTGTGGCACATGCGCTGAGGCGTCTGGGCGTAGGCCCGGATGCCCGAGTGGGTCTGTGCGCGGAGCGAAGCGTGGAGCTGGTGATCGGGCTGCTGGGAATCCTGAAGGCAGGCGGAGGATACGTGCCGCTGGACCCGTCATATCCGCAGGATCGTCTGGCCTACATGCTGGAGGACAGCGCCCCGGTGGCCGTGCTGGCGCAGTCGAACACACGCGAGCAGTTAGGGGCACTGTCGGTGCCAGTGCTGGACCTGGATGGACCGTTGGAGGAAGCCGAACACGATCCGCAGGTGACGGGCCTGGAG…		['Structure-based inference', 'Sequence-based prediction']	['pubmed:26943626']	Ralstonia
BGC0001363	NRP_Polyketide	Ralstonia solanacearum GMI1000	ralsolamycin	nrpspksdomains_RSp0642_AMP-binding.5	beta-alanine	ala	FEAQVRRTPEAIAVEHEGRQVSYAELNARANRVAHALIGLGVGPDARVGLCAERSVELVVGLLGILKAGGGYVPLDPSYPQDRLAYMLEDSAPVAVLAQSNTREQLGALSVPVLDLASPLEGEAEHDPQVEALKPHHLAYVIYTSGSTGQPKGVEATIAGLANRLQWFLRDVLTEAPVTALKTSIGFVDAVTETLGTLLAGGSLVVFDNAAVKDLSVFARRLRQTGVSHLVVVPSLLKYLLQSGEPRLDGLRTLVCSGERLAPELARQCLAAYPQVRLLNFYGSSEVNGDATFYRYAGPEHVPAHSVIGRPIANTQIYILDAYGAPVPIGVPGEIHVGGACVARGYLHRPGLTAERFVADPFHGDGRARMYRTGDLGCWQADGNIVYLGRNDHQVKLR	TTCGAGGCCCAGGTTCGCCGCACGCCAGAGGCGATCGCGGTAGAGCACGAAGGCCGGCAGGTGAGCTACGCGGAGTTGAACGCGCGGGCAAACCGGGTGGCGCACGCGCTGATCGGCTTGGGCGTCGGCCCGGATGCGCGGGTGGGTCTGTGCGCGGAGCGAAGCGTGGAACTGGTGGTCGGGCTGCTGGGGATCCTGAAGGCAGGCGGAGGATATGTCCCGCTGGACCCGTCATATCCGCAGGATCGTCTGGCCTACATGCTGGAGGACAGCGCCCCGGTGGCCGTGCTAGCGCAGTCAAACACACGCGAGCAGTTAGGGGCACTGTCGGTGCCGGTGCTGGACCTGGCGAGTCCACTGGAAGGCGAGGCCGAACACGATCCGCAGGTCGAGGCATTG…		['Structure-based inference', 'Sequence-based prediction']	['pubmed:26943626']	Ralstonia
BGC0001451	NRP	Candidatus Burkholderia crenata	FR900359	nrpspksdomains_BCRE_RS14165_AMP-binding.1	leucine	leu	FEAQATRQPNAVALEGPDGCVSYGELDARANRLASHLQSLGVGPDVVVGVCLERSIDMVVAILGIAKAGAAYLPLAPDYPTERLAYMLTDSMAPVLLTESKQVERLPSYWGHLVELDRLDLSWQASSAPARALRPDHLAYVIYTSGSTGQPKGVAVSHAGLAGLVKSQEERFAVAGPVRVLQFASLSFDAAVMEILMAFCSGGRLVLPAAGPLLGEQLEKTLNRYAISHALIAPSALETVEAEVVPGLSTLVVGGETCSGATAASWSQGRRMVNAYGPTEVTVCVTMSKPLSGSDKPKLGRPTLGAKLYVLDSTLQPVPVGVAGELYIAGRGLARGYYQRPGLTAERFVANPYGKGERLYRSGDLARWSGEGELEYLGRVDQQLKIR	TTCGAGGCTCAGGCAACCCGTCAGCCGAATGCCGTGGCGCTGGAGGGGCCGGACGGATGCGTGAGCTATGGCGAGTTGGACGCACGGGCCAACCGACTGGCAAGTCACCTGCAGAGTTTGGGCGTGGGGCCAGACGTCGTGGTCGGGGTGTGCTTGGAGCGTTCGATTGACATGGTGGTGGCGATACTTGGGATCGCCAAGGCAGGGGCTGCCTATTTGCCACTCGCGCCGGATTACCCGACCGAGCGCCTGGCCTACATGCTGACGGATTCGATGGCGCCAGTACTTTTGACCGAGTCAAAACAGGTCGAACGACTGCCGTCGTATTGGGGTCATCTGGTGGAGCTGGATCGACTCGATTTGTCGTGGCAGGCGTCGAGTGCGCCGGCGCGAGCGCTA…	CCC(=O)N[C@@H]([C@@H](C(C)C)O)C(=O)O[C@@H]([C@H]1C(=O)N([C@H](C(=O)O[C@@H]([C@@H](C(=O)O[C@@H](C(=O)N(C(=C)C(=O)N[C@H](C(=O)N([C@H](C(=O)N1)C)C)C)C)CC2=CC=CC=C2)NC(=O)C)C(C)C)[C@@H](C)OC)C)C(C)C	['Structure-based inference', 'Sequence-based prediction']	['pubmed:26663534', 'pubmed:29194875']	Burkholderia
BGC0001451	NRP	Candidatus Burkholderia crenata	FR900359	nrpspksdomains_BCRE_RS14165_AMP-binding.2	threonine	thr	FAEQVRRAPDATVLTYRGETLTCAELNARANRLARCLIADGAGPEELIAVALPRSIDMVVSLLAILKTGAAYLPMDPAYPLERLSFMLTDAKPRLLLANMETIRQVAEVSRVSTLALDCPELAQTLTRTDDSNPLVPRPLRSDNAAYLIYTSGSTGAPKGVLIPHSNVLRLLDKTAHWFDFGPKDVWTLFHSYAFDFSVWEIWGALLTSGRLVVVPQTVSLAPDEFLTLLEYEKVTILNQTPSAFYALMQAERHHGSNGGASLSLRRIIFGGEALDLSALQPWYQRHGDETTQLVNMYGITETTVHVSYQPLDSGMCGSRCNSLIGIGIPDLHLFLLDACLQPVPVGGIGELYVGGAGLARGYHNRASLTAERFVANPFASSKRMYRTGDLARRNVNDI…	TTCGCGGAGCAGGTGCGGCGCGCACCGGATGCGACGGTGCTGACTTACCGGGGCGAAACACTAACTTGTGCCGAGCTAAATGCGCGCGCCAATCGTCTAGCGCGGTGCTTAATCGCCGATGGAGCCGGTCCGGAGGAATTGATTGCAGTAGCGCTGCCGCGCTCCATCGATATGGTGGTCAGTTTGCTCGCGATCTTAAAAACCGGTGCGGCCTATCTGCCGATGGATCCCGCCTATCCGCTCGAGCGACTGTCGTTCATGTTGACCGACGCAAAGCCGAGGTTGCTGCTGGCCAATATGGAAACGATCCGGCAAGTGGCGGAGGTGTCACGCGTAAGTACTCTAGCGCTCGACTGCCCTGAACTGGCTCAAACGTTGACGCGAACGGATGATAGCAAC…	CCC(=O)N[C@@H]([C@@H](C(C)C)O)C(=O)O[C@@H]([C@H]1C(=O)N([C@H](C(=O)O[C@@H]([C@@H](C(=O)O[C@@H](C(=O)N(C(=C)C(=O)N[C@H](C(=O)N([C@H](C(=O)N1)C)C)C)C)CC2=CC=CC=C2)NC(=O)C)C(C)C)[C@@H](C)OC)C)C(C)C	['Structure-based inference', 'Sequence-based prediction']	['pubmed:26663534', 'pubmed:29194875']	Burkholderia
BGC0001451	NRP	Candidatus Burkholderia crenata	FR900359	nrpspksdomains_BCRE_RS14170_AMP-binding.1	alanine	ala	FEAQVERTPTAMAVLCDEVALDYRELNCRANQIAHWLISQGVGPEQKVALALPRRVELLVAMLGVLKAGAAYLPLDPAYPAEHLMYMLVDAKPACLLGLGDSIAALPDSNVRAWELDDEAVKQALVAQPQENPTPQPRRLRAEHPAYVIYTSGSTGKPKGVEISQRSATDFVSWAHEAFGPDTFGDVLATTSLSFDVSVFELLAPLLCGGRVNLLRDLLVLGERSIERGSLISAVPSVFAQLLQHGDLRLDASTVVFAGEALPPELVEAVRRRWPGCRAANIYGPTETTVYAIGTWLKEVEGSRAPMIGRPLGNTPAYVLDEGLRPVPVGVVGELYIGGAGLARGYLNRAGLTAERFVANPYGEGERLYRSGDLARWNAEGELEYLGRVDQQLKIR	TTCGAGGCCCAGGTGGAACGAACACCGACAGCGATGGCCGTGCTCTGCGACGAAGTTGCGCTCGATTACCGCGAACTCAATTGCCGAGCCAACCAGATCGCACACTGGTTGATTTCACAAGGTGTCGGACCGGAACAGAAGGTGGCGCTGGCGTTGCCGCGCCGGGTGGAATTGCTGGTGGCAATGCTGGGGGTGTTGAAGGCAGGGGCAGCCTACTTGCCATTGGACCCGGCCTATCCGGCGGAACATCTGATGTACATGCTGGTCGATGCCAAACCTGCATGCCTGCTCGGTCTTGGCGACAGCATTGCGGCGTTGCCGGACAGCAACGTGCGCGCCTGGGAGCTGGACGACGAAGCGGTGAAGCAGGCACTGGTGGCGCAGCCGCAAGAGAATCCG…	CCC(=O)N[C@@H]([C@@H](C(C)C)O)C(=O)O[C@@H]([C@H]1C(=O)N([C@H](C(=O)O[C@@H]([C@@H](C(=O)O[C@@H](C(=O)N(C(=C)C(=O)N[C@H](C(=O)N([C@H](C(=O)N1)C)C)C)C)CC2=CC=CC=C2)NC(=O)C)C(C)C)[C@@H](C)OC)C)C(C)C	['Structure-based inference', 'Sequence-based prediction']	['pubmed:26663534', 'pubmed:29194875']	Burkholderia
BGC0001451	NRP	Candidatus Burkholderia crenata	FR900359	nrpspksdomains_BCRE_RS14170_AMP-binding.2	alanine	ala	FEAQVERTPTAMAVLCDEVALDYRELNCRANQIAHWLISQGVGPEQKVALALPRRVELLVAMLGVLKAGAAYLPLDPAYPAEHLMYMLVDAKPACLLGLGDSIAALPDSNVRAWELDDEAVKQALVAQPQENPTPQPRRLRAEHPAYVIYTSGSTGKPKGVEISQRSATDFVSWAHEAFGPDTFGDVLATTSLSFDVSVFELLAPLLCGGRVNLLRDLLVLGERSIERGSLISAVPSVFAQLLQHGDLRLDASTVVFAGEALPPELVEAVRRRWPGCRVANIYGPTETTVYAIGTWLKEAEGSRAPMIGRPLDNTRAYVLDEGLRPVPVGVAGELYIGGTGLARGYLNRAGLTAERFVANPYGEGERLYRSGDLARWNAEGELEYLGRVDQQLKIR	TTCGAGGCCCAGGTGGAACGAACACCGACAGCGATGGCCGTGCTCTGCGACGAAGTTGCGCTCGATTACCGCGAACTCAATTGCCGAGCCAACCAGATCGCACACTGGTTGATTTCACAAGGTGTCGGACCGGAACAGAAGGTGGCGCTGGCGTTGCCGCGCCGGGTGGAATTGCTGGTGGCAATGCTGGGGGTGTTGAAGGCAGGGGCAGCCTACTTGCCATTGGACCCGGCCTATCCGGCGGAACATCTGATGTACATGCTGGTCGATGCCAAACCTGCATGCCTGCTCGGTCTTGGCGACAGCATTGCGGCGTTGCCGGACAGCAACGTGCGCGCCTGGGAGCTGGACGACGAAGCGGTGAAGCAGGCACTGGTGGCGCAGCCGCAAGAGAATCCG…	CCC(=O)N[C@@H]([C@@H](C(C)C)O)C(=O)O[C@@H]([C@H]1C(=O)N([C@H](C(=O)O[C@@H]([C@@H](C(=O)O[C@@H](C(=O)N(C(=C)C(=O)N[C@H](C(=O)N([C@H](C(=O)N1)C)C)C)C)CC2=CC=CC=C2)NC(=O)C)C(C)C)[C@@H](C)OC)C)C(C)C	['Structure-based inference', 'Sequence-based prediction']	['pubmed:26663534', 'pubmed:29194875']	Burkholderia
BGC0001451	NRP	Candidatus Burkholderia crenata	FR900359	nrpspksdomains_BCRE_RS14180_AMP-binding.1	leucine	leu	FEVQATRQPNAVALEGPDERVSYGELDARANRLASHLQSLGVGPDVVVVVCLERSIDMVVAILGIAKAGAAYLPFAPDYPTERLAYMLTDSMAPVLLTESKQVERLPSYWGHLVKLDRLDLSGQASSAPARALRPDHLAYVIYTSGSTGQPKGVAVSHAGLAGLVKSQEERFAVAGPVRVLQFASLSFDAAVMEILMAFCSGGRLVLPAAGPLLGEQLEETLNRYAISHALIAPSALETVEAEVVPGLSTLVVGGETCSGATAASWSQGRRMVNAYGPTEVTVCVTMSKPLSGSDKPKLGRPTLGAKLYVLDSTLQPVPVGVAGELYIAGRGLARGYYQRPGLTAERFVANPYGKGERLYRSGDLARWSGEGELEYLGRVDQQLKIR	TTCGAGGTTCAGGCAACCCGTCAGCCGAATGCCGTGGCGCTGGAGGGGCCGGACGAACGCGTGAGCTATGGCGAGTTGGACGCACGGGCCAACCGACTGGCAAGTCACCTGCAGAGTTTGGGCGTGGGGCCAGACGTCGTGGTCGTAGTGTGCCTGGAGCGCTCGATTGACATGGTGGTGGCGATACTTGGGATCGCCAAGGCAGGGGCTGCCTATTTGCCGTTCGCGCCGGATTACCCGACCGAGCGCCTGGCCTACATGCTGACGGATTCGATGGCGCCAGTACTTTTAACCGAGTCAAAACAGGTCGAACGACTGCCGTCGTATTGGGGTCATCTGGTGAAGCTGGATCGACTCGATTTGTCGGGGCAGGCGTCGAGTGCGCCGGCGCGAGCGCTA…	CCC(=O)N[C@@H]([C@@H](C(C)C)O)C(=O)O[C@@H]([C@H]1C(=O)N([C@H](C(=O)O[C@@H]([C@@H](C(=O)O[C@@H](C(=O)N(C(=C)C(=O)N[C@H](C(=O)N([C@H](C(=O)N1)C)C)C)C)CC2=CC=CC=C2)NC(=O)C)C(C)C)[C@@H](C)OC)C)C(C)C	['Structure-based inference', 'Sequence-based prediction']	['pubmed:26663534', 'pubmed:29194875']	Burkholderia
BGC0001451	NRP	Candidatus Burkholderia crenata	FR900359	nrpspksdomains_BCRE_RS14195_AMP-binding.1	leucine	leu	FEVQATRQPNAVALEGPDERVSYGELDARANRLASHLQSLGVGPDVVVGVCLERSIDMVVAILGIAKAGAAYLPLAPDYPTERLAYMLTDSMAPVLLTESKQVERLPSYWGHLVKLDRLDLSGQASSAPARALRPDHLAYVIYTSGSTGQPKGVAVSHAGLAGLVKSQEERFAVAGPVRVLQFASLSFDAAVMEILMAFCSGGRLVLPAAGPLLGEQLEETLNRYAISHALIAPSALETVEAEVVPGLSTLVVGGETCSGATAASWSQGRRMVNAYGPTEATVCVTMSKPLSGSDKPKLGRPTLGAKLYVLDSTLQPVPVGVAGELYIAGRGLARGYYQRPGLTAERFVANPYGKGERLYRSGDLAHWSGEGELEYLGRVDQQLKIR	TTCGAAGTTCAGGCAACCCGTCAGCCGAATGCCGTGGCGCTGGAGGGGCCGGACGAACGCGTGAGCTATGGCGAGTTGGACGCACGGGCTAACCGACTGGCGAGTCACCTGCAGAGTTTGGGCGTGGGGCCAGATGTCGTGGTCGGGGTGTGCTTGGAGCGCTCGATTGACATGGTGGTGGCGATACTTGGGATCGCCAAGGCAGGGGCTGCCTATTTGCCGCTCGCGCCGGATTACCCGACCGAGCGCCTGGCCTACATGCTGACGGATTCGATGGCGCCAGTACTTTTAACCGAGTCAAAACAGGTCGAACGACTGCCGTCGTATTGGGGTCATCTGGTGAAGCTGGATCGACTCGATTTGTCGGGGCAGGCGTCGAGTGCGCCGGCGCGAGCGCTA…	CCC(=O)N[C@@H]([C@@H](C(C)C)O)C(=O)O[C@@H]([C@H]1C(=O)N([C@H](C(=O)O[C@@H]([C@@H](C(=O)O[C@@H](C(=O)N(C(=C)C(=O)N[C@H](C(=O)N([C@H](C(=O)N1)C)C)C)C)CC2=CC=CC=C2)NC(=O)C)C(C)C)[C@@H](C)OC)C)C(C)C	['Structure-based inference', 'Sequence-based prediction']	['pubmed:26663534', 'pubmed:29194875']	Burkholderia
BGC0001451	NRP	Candidatus Burkholderia crenata	FR900359	nrpspksdomains_BCRE_RS14175_AMP-binding.1	D-phenyllactic acid	lac	FETQAALTPEAVALAFGDEVLSYAELNKQANRLARMLVAAGLGPEGRVALAVPRSLDMVVALLGVTKAGAAYLPLDPEYPAERLAYMLADAKPTLLMTVNAQLGSLSECAGIPVLALDADSVRDAISQMSGCNLVQSERLCPLQPQHPVCVIYTSGSTGRPKGVMVTHQGIVSLRASQIERFGVSAESSVLQFAFLSFGAALFEICTSLLTGARLVLVSSIKEALNVETMTALVTRHRLSHMVVPPSALDTLCADRLPRTVRIMVAGEHCPAHLVERWSADRFMVNGYGSSEVTVCATMSQPLSGRALPPMGAPNANTRLYLLDAGMQPVPAGVMGELYVAGEGLARGYLSRPGLTAERFVANPFEPGWQMYRTGDLARRDIDGRLDYLGRVDHQVKIR	TTCGAAACGCAGGCGGCGCTTACACCAGAGGCGGTAGCGCTGGCGTTTGGCGATGAAGTACTGAGCTACGCTGAACTAAACAAACAGGCCAATCGCTTGGCACGGATGCTGGTTGCCGCGGGTCTCGGGCCGGAAGGCAGGGTCGCGTTGGCCGTTCCGAGATCGCTGGATATGGTCGTGGCTTTGCTCGGCGTGACTAAGGCGGGCGCGGCGTATTTGCCGCTAGATCCAGAGTATCCGGCAGAGCGGCTGGCATACATGCTGGCCGATGCAAAGCCGACGCTGTTGATGACTGTCAACGCGCAGCTCGGTAGCCTGTCCGAATGCGCGGGGATACCGGTGCTGGCGCTGGATGCCGATTCGGTTCGGGACGCGATTTCGCAGATGTCAGGATGCAAC…	CCC(=O)N[C@@H]([C@@H](C(C)C)O)C(=O)O[C@@H]([C@H]1C(=O)N([C@H](C(=O)O[C@@H]([C@@H](C(=O)O[C@@H](C(=O)N(C(=C)C(=O)N[C@H](C(=O)N([C@H](C(=O)N1)C)C)C)C)CC2=CC=CC=C2)NC(=O)C)C(C)C)[C@@H](C)OC)C)C(C)C	['Structure-based inference', 'Sequence-based prediction']	['pubmed:26663534', 'pubmed:29194875']	Burkholderia
BGC0001451	NRP	Candidatus Burkholderia crenata	FR900359	nrpspksdomains_BCRE_RS14175_AMP-binding.2	serine	ser	FERQVRLTPDASALTFGSQTLSYAVLNACANRLARWLLMHSIGPDDVVAVALPRSIDLVIALLAVVKSGAAYLPLDADYPRNRLDFMLTDARPRALLTNGSMVEALSPAAGTQVLLLDAPEWTAARNHLDDRDMVVTERKQPLRPLDAAYVIYTSGSTGLPKGVVNTHHGIVNRLTWMQSAYRLDASDVVLQKTPFSFDVSVWEFFWPLLNGARLVMAVPDGHRDPAYLAELIQRQGVTTLHFVPSMLDAFLNEPSSRQCLSLKRVLCSGEVLSGNLAALQQHVLKRPLHNLYGPTEAAVDVTAHACDPNDTGSSIQIGKPIWNTRIHVLDEGLRPVPLGVAGELYIGGTGLARGYLNRAGLTAERFVANPYGEGERLYRSGDLARWNAEGELEYLGRL…	TTCGAGCGTCAGGTACGGTTGACACCCGATGCCTCTGCGCTAACTTTTGGGTCCCAAACGCTAAGTTATGCGGTCCTGAATGCGTGCGCCAATCGACTCGCCAGATGGTTGTTGATGCACAGTATCGGGCCGGACGATGTGGTCGCCGTGGCATTGCCGCGTTCAATCGATCTGGTCATCGCGTTGTTGGCGGTCGTGAAAAGCGGCGCAGCCTATCTGCCACTGGATGCCGACTATCCGAGGAACCGCCTCGACTTCATGCTGACAGATGCCAGACCGCGAGCGTTGTTGACCAATGGGTCGATGGTCGAGGCTCTGTCGCCCGCTGCAGGGACTCAGGTGTTGCTGCTGGATGCCCCTGAGTGGACGGCAGCGCGAAATCACCTCGATGATCGCGAC…	CCC(=O)N[C@@H]([C@@H](C(C)C)O)C(=O)O[C@@H]([C@H]1C(=O)N([C@H](C(=O)O[C@@H]([C@@H](C(=O)O[C@@H](C(=O)N(C(=C)C(=O)N[C@H](C(=O)N([C@H](C(=O)N1)C)C)C)C)CC2=CC=CC=C2)NC(=O)C)C(C)C)[C@@H](C)OC)C)C(C)C	['Structure-based inference', 'Sequence-based prediction']	['pubmed:26663534', 'pubmed:29194875']	Burkholderia
BGC0001599	NRP	Burkholderia cenocepacia H111	fragin	nrpspksdomains_I35_4194_AMP-binding.1	valine	val	RAAAAAPDACALVAADGQLTYRELVARARQVAARIAARPAAPRVVAVRLDKGVALYPALVGVLGAGATCVPLDPAFPPERARTILRESGAQALVVDGAVEPALLDGFDLDVIDCGAHAKADADASPDALSGQWPLERDADRAARCAVAIYTSGSTGVPKGVMLSHRNIVQFCHWYRAHVSLDASSRVLQFSTVAFDASLLDMFPTWLAGATLVAPSEAQRRELDALAALVADARITHAFLPPALLAALPDCDWPALAHLVTGGDVCDPDTIARWSANRRLHNIYGPTECTVLATTGELRAGDSNRRIGRPIANARCHVLAADGRPALTGEEGELCIAGAGVGLGYLGRPDLSAERFVADPYGTPGATMYRTGDIASWEPDGTLRYVGRRDAQLKIR	CGTGCGGCGGCCGCCGCGCCGGACGCCTGCGCGCTCGTCGCGGCCGATGGCCAACTGACCTATCGCGAGCTGGTCGCGCGTGCCCGCCAGGTTGCCGCGCGCATTGCCGCGCGGCCCGCTGCGCCGCGCGTGGTCGCGGTGCGGCTCGACAAGGGCGTCGCGCTGTATCCGGCGCTCGTCGGCGTGCTGGGCGCCGGCGCGACCTGCGTGCCACTCGATCCGGCGTTTCCGCCCGAACGGGCCCGCACGATCCTGCGTGAATCGGGGGCGCAGGCGCTCGTCGTCGACGGTGCGGTCGAGCCGGCGCTGCTCGACGGATTCGACCTCGACGTGATCGACTGCGGCGCGCACGCGAAAGCGGACGCGGACGCCTCGCCCGATGCGCTGTCCGGCCAGTGG…	CCCCCCCC(=O)NCC(C(C)C)/[N+](=N/O)/[O-]	['Structure-based inference']	['pubmed:29602945']	Burkholderia
BGC0001711	NRP_Polyketide	Burkholderia pyrrocinia	occidiofungin A	nrpspksdomains_JM78_19285_AMP-binding.1	serine	ser	FEQQVERTPDAVAAVCDDASLTYAELNLRANRVAHRLIELGVVPDALVGVAMERSLDMIVALLAILKAGGAYVPVDPDYPAERVRFMIDNAQLRWLLTQQHLLAALPDTDARVIVVDRDTLELDAAPASNPAPALSGDNLAYMIYTSGSTGRPKGALNTHRAITNRILWMQHAYTLGADESVLQKTPFSFDVSVWEFFWPLIVGARLVFARPGGQRETDYLVELIERERITTIHFVPSMLRAFLDHPDLDAHCASLRRVVCSGEALPFDLQQRFFARLDAKLYNLYGPTEAAVDVTAWECRRDDPHRIVPIGRPIANTRLYIVDAQLQPMPVGVAGELLIGGTPVGRGYLGEPELSAEKFIADPFSTDPHARLYRTGDLARYRPDGNVEFLGRIDHQIK…	TTCGAACAACAGGTCGAGCGCACGCCCGACGCCGTCGCCGCCGTCTGCGACGACGCCTCGCTCACCTACGCCGAACTCAACCTGCGCGCCAATCGCGTCGCCCACCGGCTCATCGAGCTCGGCGTCGTTCCCGATGCTCTCGTCGGCGTCGCGATGGAGCGCTCGCTCGACATGATCGTCGCGCTGCTCGCGATCCTCAAGGCCGGCGGCGCCTACGTCCCCGTCGATCCCGACTACCCCGCCGAGCGCGTGCGTTTCATGATCGACAACGCGCAGTTGCGCTGGCTCCTCACCCAGCAGCATCTGCTTGCCGCGCTGCCCGACACCGACGCCCGCGTGATCGTCGTCGATCGCGACACGCTCGAGCTCGACGCCGCGCCCGCGTCCAACCCCGCGCCT…	CCCCOC1CNC(=O)[C@H](CC(N)=O)NC(=O)[C@H](CO)NC(=O)[C@H](CC(N)=O)NC(=O)CNC(=O)[C@H](CCCCN)NC(=O)[C@@H](NC(=O)[C@H](CC2=CNC3=C2C=CC=C3)NC(=O)CC(C1)OC1OC[C@@H](O)[C@H](O)[C@H]1O)C(O)C1=CC=C(O)C=C1	['Structure-based inference', 'Sequence-based prediction']	['pubmed:26910858']	Burkholderia
BGC0001711	NRP_Polyketide	Burkholderia pyrrocinia	occidiofungin A	nrpspksdomains_JM78_19295_AMP-binding.1	R-beta-hydroxytyrosine	tyr	FAQRVAAAPDGIAVVTADASLTYAELDDQASRLASFLLAEYAIERGDVVGVVADRSERWIVGMLGALKAGAVYLPLDPEFPRERLRFMIEDAKVKALLTHSEHLPLLADFWAIPMFALDFQLDTLAPASAAAQVEVRPDDAAYIIYTSGSTGVPKGVVLEHAGLLNMAQYHVDAFGFDAADRFVQFYSPGFDGSIMEIFVTLLAGARLVLAKPAVIRDVPRFVEYIAQQGVTTLNATPAYLAALDWNALGTVKRVISAGDSARAADLRELARTRTCHNSYGPTEATVCVADYVVDPATAYGARLPVGRPIHNTHLYLLDEHGALAPEGCTGEICVSGIALARGYVGRDDLTAAAFVDHPSDAGERLYRTGDLGVWLPDGNLEVTGRRDTQVKIR	TTCGCGCAACGGGTCGCGGCCGCGCCGGACGGCATCGCCGTGGTGACCGCCGATGCATCGCTGACCTACGCCGAACTGGACGACCAGGCGTCCCGGCTGGCGAGCTTCCTGCTCGCGGAATACGCGATCGAACGCGGCGACGTGGTGGGCGTGGTGGCCGACCGTTCCGAGCGCTGGATCGTCGGCATGCTCGGCGCCCTCAAGGCGGGCGCGGTGTATCTGCCGCTCGACCCGGAGTTTCCGCGGGAGCGGCTGCGCTTCATGATCGAGGACGCGAAGGTCAAGGCGCTGCTGACGCACTCGGAACACCTGCCGTTGCTCGCCGATTTCTGGGCGATCCCGATGTTCGCCCTCGACTTCCAGCTCGACACGCTGGCGCCTGCATCGGCGGCGGCGCAG…	CCCCOC1CNC(=O)[C@H](CC(N)=O)NC(=O)[C@H](CO)NC(=O)[C@H](CC(N)=O)NC(=O)CNC(=O)[C@H](CCCCN)NC(=O)[C@@H](NC(=O)[C@H](CC2=CNC3=C2C=CC=C3)NC(=O)CC(C1)OC1OC[C@@H](O)[C@H](O)[C@H]1O)C(O)C1=CC=C(O)C=C1	['Structure-based inference', 'Sequence-based prediction']	['pubmed:26910858']	Burkholderia
BGC0001711	NRP_Polyketide	Burkholderia pyrrocinia	occidiofungin A	nrpspksdomains_JM78_19300_AMP-binding.1	2,4-diaminobutyric acid	dab	EQAAADHPERPAVEYRGNVLSAGELNARANRTARRLLAAAELGPDALVAICMHRSARLMEAILAVWKCGAAYIPIDPDYPVARIRTILEDSGAALVITCDGLLPSELAALAPVVSLDAATDIVDDTNPGRPVSPDSLAYVIYTSGSTGRPKGAMVEHAGMLNHMLAEIDEFSISASSVIAQTAPHCFDISVWQFFTAPLVGGKTVIVDDECIRDPASFVTTLEATRISIVELVPSYLSAVLDRASERPALMRHLRHLLVTGEMVSPALVKQWFDVFPDIALVNAYGPAEASDDVAQHRMTCAPTTPYVPVGKPIRNVRLYVVDPQLNLCPIGIPGELCVSGVAVGRGYLNNEAATREAFIEDPFHPDRGVRLYRTGDIGCYLPDGTIVLHGRKDHQLKIR	GAGCAGGCCGCCGCGGACCATCCCGAGCGGCCCGCGGTCGAGTACCGGGGCAACGTCCTGAGCGCGGGCGAACTGAATGCGCGCGCCAACCGCACCGCTCGCCGCCTGCTGGCCGCCGCCGAGCTGGGGCCGGACGCGCTGGTCGCAATCTGCATGCACCGGTCGGCGCGCCTGATGGAGGCGATCCTCGCCGTGTGGAAGTGCGGCGCCGCCTATATTCCGATCGACCCCGACTATCCGGTGGCCCGCATCCGCACCATTCTCGAGGATTCCGGCGCCGCCCTCGTGATTACCTGCGACGGCCTGCTTCCTTCCGAGCTGGCCGCGCTCGCACCGGTCGTGTCGCTCGACGCCGCCACCGATATCGTCGACGACACCAATCCCGGCCGCCCCGTATCG…	CCCCOC1CNC(=O)[C@H](CC(N)=O)NC(=O)[C@H](CO)NC(=O)[C@H](CC(N)=O)NC(=O)CNC(=O)[C@H](CCCCN)NC(=O)[C@@H](NC(=O)[C@H](CC2=CNC3=C2C=CC=C3)NC(=O)CC(C1)OC1OC[C@@H](O)[C@H](O)[C@H]1O)C(O)C1=CC=C(O)C=C1	['Structure-based inference', 'Sequence-based prediction']	['pubmed:26910858']	Burkholderia
BGC0001711	NRP_Polyketide	Burkholderia pyrrocinia	occidiofungin A	nrpspksdomains_JM78_19300_AMP-binding.2	glycine	gly	EAVAAAHPERIAVRCGTEVRTYRDLVEGADRIAGHLLQTAPIRPDDRIAVWMPRSPLMLETILAIWKCGAAYVPVDPAYPAQRVETILTLARPAIIVGTDCQPPPALASIPLVDPARLPVHRDAAAPTPRCRPADLAYVIFTSGSTGQPKGAMVEHRGMLNHVLAMARRVGLGARSAVAQTASHCSDISVWQCFAALVSGGTTVIYPDAVILEPARLIDNLHRDRITAMQFVPSYLATFLGELERHATPAFPHLETLLTIGETLQPATAQAWFRLNPAVRLINAYGPTEASDSVAHYSMERAPDLPAIPIGRPIENLRVYVVDADMNPCPAGVKGEICIGGVGVGRGYLFDEARTRTVFRDDPFSPEPGARLYRTGDIGCFGPDGNLHFFGRRDFQVKIR	GAGGCCGTGGCCGCCGCGCACCCCGAGCGCATTGCGGTCCGCTGCGGCACGGAGGTTCGCACCTATCGGGACCTCGTCGAAGGCGCCGACCGGATCGCCGGCCATCTTCTGCAGACGGCGCCGATCCGGCCGGACGACCGGATCGCGGTCTGGATGCCGCGCTCGCCGCTGATGCTGGAAACGATCCTGGCCATCTGGAAGTGCGGCGCGGCGTATGTTCCGGTCGATCCGGCCTATCCGGCCCAGCGGGTCGAGACCATCCTGACGCTGGCCCGGCCGGCCATCATCGTCGGCACCGACTGCCAGCCGCCGCCGGCGCTGGCGTCGATCCCGCTGGTCGATCCCGCCCGCCTGCCCGTCCATCGCGACGCGGCAGCGCCGACGCCGCGCTGCCGGCCC…	CCCCOC1CNC(=O)[C@H](CC(N)=O)NC(=O)[C@H](CO)NC(=O)[C@H](CC(N)=O)NC(=O)CNC(=O)[C@H](CCCCN)NC(=O)[C@@H](NC(=O)[C@H](CC2=CNC3=C2C=CC=C3)NC(=O)CC(C1)OC1OC[C@@H](O)[C@H](O)[C@H]1O)C(O)C1=CC=C(O)C=C1	['Structure-based inference', 'Sequence-based prediction']	['pubmed:26910858']	Burkholderia
BGC0001711	NRP_Polyketide	Burkholderia pyrrocinia	occidiofungin A	nrpspksdomains_JM78_19305_AMP-binding.1	asparagine	asn	FEAQVARTPAAPALVTDSSLMTYADLNARANSLAHQLRDRYGAGPESLVGVMLDRSEWMIVAILGILKAGAAFVPLDPAYPAERINHILGDTGLSLLVTQSSQLAQWYEFSGATLLLDQELPGWTPLPDNPPRRAEPSQLAYVIYTSGSTGRPKGCLLEHRNLAHYIAWAAGYYFPESTTGSFGLYSSLCFDFTLTNIFCPLVRGKTLRIYPQSESIDTILARMFQPGSGVDTLKLTPTHIHLLEYMNLARSGVRKVIVGGEELTPQHIATLRKIDPAIEIYNEYGPTEATVGCIVERVEDAPSTVLIGRPIANTRVYMLDDALRPVPIGVPGEICIAGDGLARGYHKRPDVTAAKFVEHPFPGEARVYRTGDIGRWLPDGRIQCYGRVDDQVKIR	TTCGAAGCGCAGGTCGCCCGCACGCCGGCGGCGCCGGCCCTGGTCACCGACAGTTCGCTGATGACCTACGCCGACCTGAACGCCCGCGCCAACAGCCTCGCGCATCAATTGCGCGACCGCTACGGCGCCGGGCCGGAATCGCTGGTCGGCGTCATGCTCGACCGTTCCGAATGGATGATCGTCGCGATTCTCGGCATATTGAAGGCGGGGGCGGCGTTCGTTCCGCTGGACCCGGCGTATCCGGCCGAACGGATCAATCACATCCTCGGCGACACCGGCCTGTCGCTGCTGGTGACCCAATCGAGTCAACTGGCGCAGTGGTATGAATTCTCCGGCGCGACGCTGCTGCTGGATCAGGAACTGCCCGGCTGGACGCCGCTGCCGGACAATCCGCCGCGC…	CCCCOC1CNC(=O)[C@H](CC(N)=O)NC(=O)[C@H](CO)NC(=O)[C@H](CC(N)=O)NC(=O)CNC(=O)[C@H](CCCCN)NC(=O)[C@@H](NC(=O)[C@H](CC2=CNC3=C2C=CC=C3)NC(=O)CC(C1)OC1OC[C@@H](O)[C@H](O)[C@H]1O)C(O)C1=CC=C(O)C=C1	['Structure-based inference', 'Sequence-based prediction']	['pubmed:26910858']	Burkholderia
BGC0001711	NRP_Polyketide	Burkholderia pyrrocinia	occidiofungin A	nrpspksdomains_JM78_19305_AMP-binding.2	serine	ser	FEQQVERTPDAVAAVCDDASLTYAELNLRANRLAHRLIELGVVPDALVGVAMERSLDMIVALLAILKAGGAYVPVDPDYPAERVRFMIDNAQLRWLLTQQHLLAALPDTDARVIVVDRDTLELDAAPASNPAPALSGDNLAYMIYTSGSTGRPKGALNTHRAITNRILWMQHAYMLGADESVLQKTPFSFDVSVWEFFWPLSVGARLVFARPGGQRETDYLVELIERERITTIHFVPSMLRAFLDHPDLDAHCASLRRVVCSGEALPFDLQQRFFARLDAKLYNLYGPTEAAVDVTAWECRRDDPHRIVPIGRPIANTRLYIVDAQLQPMPVGVAGELLIGGTPVGRGYHGEPELSAGKFIADPFSTDPHARLYRTGDLARYRPDGNVEFLGRIDHQIK…	TTCGAACAACAGGTCGAGCGCACGCCCGACGCCGTCGCCGCCGTCTGCGACGACGCCTCGCTCACCTACGCCGAACTCAACCTGCGCGCCAATCGCCTCGCCCATCGGCTCATCGAGCTCGGCGTCGTTCCCGATGCTCTCGTCGGCGTGGCGATGGAGCGTTCGCTCGACATGATCGTCGCGCTGCTCGCGATCCTCAAGGCCGGCGGCGCTTACGTCCCCGTCGATCCCGACTACCCCGCCGAGCGCGTGCGTTTCATGATCGACAACGCGCAGTTGCGCTGGCTCCTCACCCAGCAGCATCTGCTTGCCGCGCTGCCCGACACCGACGCCCGCGTGATCGTCGTCGATCGCGACACGCTCGAGCTCGACGCCGCACCCGCGTCCAACCCCGCGCCT…	CCCCOC1CNC(=O)[C@H](CC(N)=O)NC(=O)[C@H](CO)NC(=O)[C@H](CC(N)=O)NC(=O)CNC(=O)[C@H](CCCCN)NC(=O)[C@@H](NC(=O)[C@H](CC2=CNC3=C2C=CC=C3)NC(=O)CC(C1)OC1OC[C@@H](O)[C@H](O)[C@H]1O)C(O)C1=CC=C(O)C=C1	['Structure-based inference', 'Sequence-based prediction']	['pubmed:26910858']	Burkholderia
BGC0001758	NRP	Paraburkholderia rhizoxinica HKI 454	rhizomide A	nrpspksdomains_RBRH_RS12370_AMP-binding.1	leucine	leu	FEAQVERTPKATALVYEDQTLSYTQLNAQANRLAHQLIELGVKPDVRVAICVERSPALVVGLLAILKAGGAYVPLDPSYPGERLAHILGNAEPNMVLADAAGRTALGEAALAECTVLDPATLPALPDTNPSVAELTARHLAYVIYTSGSTGTPKGVMVEHRNVANLCAWHNRKFGVQSGCRSAFMAGMAFDASAWELWPSLIGGGMLSIPSQAVCEQVLALLQWWQQQLLDVAFLVTPLAEMALADQRTPAGLRYLLTGGERFPGVTRALPAGLTLVNQYGPTEATVVATSGQLSAEDTLPHIGRPIDNTRIYILDAYRQPVPLGAVGELYIGGTGVARGYLNRPELTAERFVPDPFSEDADARLYKTGDLARYLPDGNLEFVGRNDDQVKIR	TTTGAAGCGCAAGTTGAGCGCACGCCCAAGGCTACGGCGTTGGTCTATGAAGATCAAACACTGAGCTATACGCAACTGAATGCGCAGGCCAACCGCTTGGCACACCAGCTCATCGAGCTAGGCGTTAAGCCCGATGTACGAGTGGCGATCTGTGTCGAGCGCTCGCCGGCGCTGGTCGTCGGCCTGCTGGCGATTTTAAAGGCCGGGGGTGCATATGTGCCGTTGGATCCGAGCTATCCGGGTGAGCGCTTGGCCCATATTCTGGGTAATGCGGAACCGAACATGGTGCTGGCGGATGCGGCCGGGCGCACTGCGTTGGGCGAGGCGGCGTTGGCCGAGTGCACGGTGCTCGATCCGGCCACTCTGCCAGCGTTGCCAGACACGAATCCGTCGGTAGCC…		['Structure-based inference', 'Sequence-based prediction']	['pubmed:29666226']	Mycetohabitans
BGC0001758	NRP	Paraburkholderia rhizoxinica HKI 454	rhizomide A	nrpspksdomains_RBRH_RS12370_AMP-binding.2	threonine	thr	FEAQVERTPEAPALVYEAQTLSYAQLNAQANRLAHQLIELGGVKPDIRVAICVERSPALVVGVLAILKAGGAYVPLDPAYPSERLAYILADAAPNIVLADAAGRAALGDAVIAECTVLDPATLPALPDTNPSVAELTARHLAYVIYTSGSSGTPKGVMVEHAQVVRLFEATQPWYGFNEHDTWCLFHSFAFDFSVWELWGALRYGGKLVIVPHPIARSADAFYPLICEQGVTVLNQTPSAFKALMASQAHSALSDQLRYVILGGEALEPTLLQAWYATHDERHPQLFNMYGITEATVHVTYRPLRQQDSEQAGSPVGTRIPDLTIYLLDAHGQPVPLGAVGELYIGGAGVARGYLNRPELTAERFVHDPFSEDADARLYKTGDLARYLPDGNLEFVGRN…	TTCGAAGCGCAAGTCGAGCGCACGCCCGAAGCGCCGGCGCTGGTGTATGAAGCGCAGACACTGAGCTATGCGCAGCTGAACGCACAAGCTAATCGCCTCGCGCACCAGTTGATCGAGCTGGGTGGTGTCAAGCCAGACATCCGGGTGGCGATCTGCGTTGAGCGCTCACCGGCGCTGGTTGTGGGGGTGCTGGCGATTTTGAAGGCCGGGGGTGCGTATGTGCCGTTGGATCCCGCGTATCCGAGTGAGCGCTTGGCGTACATTCTCGCCGATGCGGCACCGAACATTGTACTCGCGGATGCGGCCGGACGTGCTGCGTTGGGCGACGCGGTGATTGCCGAGTGCACGGTGCTCGATCCGGCCACCCTGCCGGCGTTGCCGGACACGAATCCGTCGGTG…		['Structure-based inference', 'Sequence-based prediction']	['pubmed:29666226']	Mycetohabitans
BGC0001758	NRP	Paraburkholderia rhizoxinica HKI 454	rhizomide A	nrpspksdomains_RBRH_RS12370_AMP-binding.3	tyrosine	tyr	FEAQVERTPEAPALVYEAQTLSYAQLNAQANRLAHQLIELGVKPDARVAICVQRSPVLVVGLLAILKAGGAYVPLDPSYPGERLAYILADAAPNIVLADTAGRAALGEAALAERTVLDPATLSALPDTNPSVAGLTARHLAYVIYTSGSTGMPKGVMVEHRGVVNLALAQIACFGVQPASRMLQFASFSFDASASEIWMAFGSGAALYLPPEAARQDRHALWDYLASHAITHATLPPALLQHGADLPSFGLSLTLILAGEAPSATLVRDLADQGTVFNAYGPTETTVCATAWRGARDFSGEVPIGRPIANTRIYLLDAYGQPVPLGAVGELYIGGAGVARGYLNRPELTAERFVRDPFVDEPDARMYKTGDLARYLPDGNLEFLGRNDEQVKIR	TTCGAAGCGCAGGTCGAGCGCACGCCCGAAGCGCCGGCGCTGGTGTATGAAGCGCAGACACTAAGCTATGCGCAGCTGAACGCACAAGCCAATCGCCTCGCGCACCAGTTGATCGAGCTGGGCGTCAAGCCCGATGCACGGGTGGCGATATGCGTGCAGCGTAGTCCCGTGCTGGTCGTGGGGTTGCTGGCGATTTTGAAGGCCGGCGGCGCGTATGTGCCGCTCGATCCGAGCTATCCGGGTGAGCGCTTGGCGTACATCCTCGCTGATGCGGCACCGAACATTGTGCTCGCGGATACGGCTGGGCGTGCTGCGTTGGGCGAGGCGGCGTTGGCCGAGCGCACGGTGCTCGATCCGGCCACCCTGTCGGCGTTGCCGGACACGAATCCGTCGGTGGCG…		['Structure-based inference', 'Sequence-based prediction']	['pubmed:29666226']	Mycetohabitans
BGC0001758	NRP	Paraburkholderia rhizoxinica HKI 454	rhizomide A	nrpspksdomains_RBRH_RS12370_AMP-binding.4	alanine	ala	FEAQVERTPEAPALVYEAQTLSYAQLNAQANRLAHQLIELGVKPDTCVAICVQRSAALVVGLLAILKAGGAYVPLDPSYPGERLAHILADAAPNIVLADAAGCAALGEMALAECTVLDPTTLPALPDTNPSIAELTARHLAYVIYTSGSTGTPKGVMVEHAQAVNFLCWAVQTFTPLETQHTLFATSISFDLSVYECFVPLAQGSTVHLVKDALALMHQTQPVSLINTVPSALQSLLAHRANLSSATTINLAGEPLTARFIQQIFEQTPIQRLCNLYGPSESTTYSTWLSIQRGEALIESIGRPIANTRVYLLDAHGQPVPLGAVGELYIGGAGVARGYLNRPKLTAERFVRDPFVGEPDARMYKTGDLARYLPDGNLEFLGRNDEQVKIR	TTCGAAGCGCAGGTTGAGCGCACGCCCGAAGCGCCAGCGCTGGTGTATGAAGCGCAGACACTGAGCTATGCGCAGCTGAACGCGCAAGCCAATCGCCTCGCGCACCAGTTGATCGAGCTGGGCGTTAAGCCGGACACGTGCGTGGCGATTTGCGTGCAGCGCAGTGCCGCGCTGGTCGTGGGGCTGCTGGCGATTTTGAAGGCTGGGGGCGCGTATGTGCCGCTCGATCCGAGCTATCCGGGCGAGCGCTTGGCGCACATCCTCGCCGATGCGGCACCGAACATTGTGCTGGCCGATGCGGCCGGGTGCGCTGCGTTGGGCGAGATGGCGTTGGCCGAGTGTACGGTGCTCGATCCGACCACCCTGCCGGCGTTGCCGGACACGAATCCGTCGATCGCC…		['Structure-based inference', 'Sequence-based prediction']	['pubmed:29666226']	Mycetohabitans
BGC0001758	NRP	Paraburkholderia rhizoxinica HKI 454	rhizomide A	nrpspksdomains_RBRH_RS12370_AMP-binding.5	alanine	ala	FEAQVERTPEAPALVYEAQTLSYAQLNAQANRLAHQLIELGVKPDTCVAICVQRSAVLVVGVLAVLKAGGAYVPLDPSYPGERLAHILADAAPNIVLADAAGRAALGEVALAECTVLDPTTLPALPDTNPSIAELTARHLAYVIYTSGSTGTPKGVMVEHAQAVNFLCWAVQTFTPLETQHTLFATSISFDLSVYECFVPLAQGSTVHLVKDALALMHHTQPVSLINTVPSALQSLLAHQADLSSVVTINVAGEPLRSSLIKQAFEKTPVQRLCNLYGPSESTIYSTWLSIQRGEPFVESIGRPIANTRIYLLNGYGQPVPLGAVGELYIGGAGVARGYLNRPELTAERFVHDPFVNETHARMYKTGDLARYLPDGNLEFLGRNDHQVKIR	TTCGAAGCGCAGGTTGAGCGCACGCCCGAAGCGCCAGCGCTGGTGTATGAAGCGCAGACACTGAGCTATGCGCAGCTGAACGCACAAGCCAATCGCCTCGCGCACCAGTTGATCGAGCTGGGCGTTAAGCCGGACACGTGCGTGGCGATTTGCGTGCAGCGCAGTGCCGTGCTGGTCGTGGGGGTGCTGGCGGTTTTGAAGGCTGGGGGCGCGTATGTGCCGCTCGATCCGAGCTATCCGGGCGAGCGCTTGGCGCACATCCTCGCCGATGCGGCACCGAACATTGTGCTGGCCGATGCGGCCGGGCGCGCTGCGTTGGGCGAGGTGGCGTTGGCCGAGTGCACGGTGCTCGATCCGACCACCCTGCCGGCGTTGCCGGACACGAATCCGTCGATCGCC…		['Structure-based inference', 'Sequence-based prediction']	['pubmed:29666226']	Mycetohabitans
BGC0001758	NRP	Paraburkholderia rhizoxinica HKI 454	rhizomide A	nrpspksdomains_RBRH_RS12370_AMP-binding.6	alanine	ala	FEAQVERTPQATALVYEEQTLSYAQLNAQANRLAHQLIELGVVPDARVAICVERSPAMVVGLLAILKAGGAYVPLDPAYPGARLAHILTDAAPDIVLADAAGRAALGEAALAHRTVLDPTTLPALPDTNPSIAELTARHLAYVIYTSGSTGTPKGVMVEHAQAVNFLCWAVQTFTPLETQHTLFATSISFDLSVYECFVPLAQGSTVHLVKDALALMHQTQPVSLINTVPSALQSLLTHGANLSSATTINLAGEPLTARFIQQIFEQTPIQRLCNLYGPSESTTYSTWLSIQRGEAWIESIGRPIANTRVYLLDAHGQPVPLGAVGELYIGGAGVARGYLNRPELTAERFVRDPFVGEPDARMYKTGDLARYLPDGNLEFLGRNDEQVKIR	TTTGAAGCGCAAGTGGAGCGCACGCCACAGGCGACAGCACTGGTCTATGAGGAGCAGACGCTCAGCTACGCTCAGTTGAATGCGCAAGCGAATCGCTTGGCACATCAGTTGATTGAACTGGGTGTTGTGCCCGATGCACGAGTGGCGATCTGTGTGGAGCGCAGTCCCGCGATGGTGGTGGGGCTATTGGCGATTTTGAAAGCGGGCGGAGCGTACGTGCCGCTGGATCCGGCGTATCCAGGTGCGCGGCTCGCGCATATTCTCACGGATGCGGCACCGGACATTGTGCTGGCCGATGCGGCGGGCAGGGCGGCGCTGGGTGAGGCGGCCTTGGCTCATCGCACGGTGCTCGATCCGACCACCCTGCCGGCGTTGCCGGACACGAATCCGTCGATCGCC…		['Structure-based inference', 'Sequence-based prediction']	['pubmed:29666226']	Mycetohabitans
BGC0001758	NRP	Paraburkholderia rhizoxinica HKI 454	rhizomide A	nrpspksdomains_RBRH_RS12370_AMP-binding.7	valine	val	FEAQVERTPEAPALVYEDQTFSYAQLNAQANRLAHQLIELGVKPDTCVAICVQRSAALVVGLLAILKAGGAYVPLDPSYPGERLAHILTDAAPSIVLADAAGRAALGEAALAECTVLDPATLPALPDTNPSVAGLTARHLAYVIYTSGSTGTPKGVMVPHHAIARLVINNDYVDICTGDRVAFAANPAFDASTFEVWAPLLNGATVVVIDHDTVLMPAAFAHTLREQHISILWLTVGLFNQMAAQVDTAFSQLKVLIVGGDVLDARLVARVMRESPPEQLINGYGPTESTTFATTYKITSVPETNASLPIGRPIANTRVYLLDAHGQPVPLGAVGELYIGGAGVARGYLNRPELTAERFVRDPFSDEADARLYKTGDLVRYLPDGNLEFLGRNDDQIKIR	TTCGAAGCGCAAGTCGAGCGCACACCCGAGGCGCCGGCGCTGGTCTATGAAGATCAAACGTTCAGTTATGCGCAGCTGAACGCACAAGCCAATCGCCTCGCGCACCAGTTGATCGAGCTGGGCGTTAAGCCGGACACGTGCGTGGCGATTTGCGTGCAGCGCAGTGCCGCGCTGGTCGTGGGGCTGCTGGCGATTTTGAAGGCTGGGGGCGCGTATGTGCCGCTCGATCCGAGCTATCCGGGCGAGCGCTTGGCGCACATTCTCACCGATGCGGCACCGAGCATTGTGCTGGCGGATGCAGCCGGGCGCGCTGCGTTGGGCGAGGCGGCGTTGGCCGAGTGTACGGTGCTCGATCCGGCTACCCTGCCGGCGTTGCCGGACACGAATCCGTCGGTGGCG…		['Structure-based inference', 'Sequence-based prediction']	['pubmed:29666226']	Mycetohabitans
BGC0001790	NRP	Pseudomonas acidophila	sulfazecin	nrpspksdomains_sulI_AMP-binding.1	glutamic acid	glu	FTEVAARRRDATALVCGDEHWTYGQLAAHAGRIAAAISAAGGSANEPVALLYPHGAPMIAAMLGVLGAGKFYVPLIADHPLPHLQSVVRECGCRIVLAAPALVDTATQLGVEVRIIDDASLPDVDRALDTRPGDAVSYLLFTSGTTGVPKGVMQCDRNVLHHAACYASSIGLGVDDRMTLLPYYGFDASVMDIFATLLTGASLHIWDVRERGVEGIGEWLTRERITIWHSTPSVLRAAFPIFAQPAALRWVVLGGEAATGNDAVLAARQGGPQCRLLNGLGPTECTTALQYVADPVADANAPRLPVGRPVPGVEIMLLDAAGEVSATEGELAIVSPFVALGYWGRPELSAERFGATARADGARRYRTGDLLRMNADGCYEHLTRVDDQIKIR	TTCACCGAAGTGGCGGCGCGCCGTCGCGATGCGACCGCGCTGGTGTGTGGCGACGAACACTGGACCTACGGCCAGCTCGCCGCGCACGCCGGGCGGATTGCCGCGGCGATCAGCGCCGCGGGCGGATCCGCTAACGAGCCGGTCGCCTTGCTCTATCCGCATGGGGCGCCGATGATCGCCGCCATGCTCGGCGTGCTGGGCGCCGGAAAATTCTACGTTCCGCTGATTGCCGATCATCCCCTACCGCATCTGCAGTCCGTGGTGCGCGAGTGTGGTTGCCGCATCGTACTGGCCGCGCCGGCGCTCGTGGACACGGCGACGCAGCTAGGCGTCGAGGTTCGCATCATCGACGATGCGTCCTTGCCGGATGTGGATCGTGCGCTGGACACGCGCCCGGGC…	C[C@H](C(=O)N[C@]1(CN(C1=O)S(=O)(=O)O)OC)NC(=O)CC[C@H](C(=O)O)N	['Sequence-based prediction', 'ACVS assay', 'Structure-based inference']	['pubmed:28017601']	Paraburkholderia
BGC0001790	NRP	Pseudomonas acidophila	sulfazecin	nrpspksdomains_sulM_AMP-binding.1	alanine	ala	FDARLRSCPGATAVWFDNASMTFAQLGERVDALAGQLVERTGGEPKRIAICLERSFEMVIAVLAILKAGCAYVPLDPRLPAERIDFMLDDSAAALLVTVASIRDERFAAHRIETLCIDERALRGTASARAVMPVISEQAIAYVLYTSGSTGMPKGVVVTHANVTNLLDTLQARYPLEALDCYLLKTNYAFDVSVPELFGWFIGHGSLAILPPQAEGSPDLIIDALLRHGVTHVNFTPSMLRQFVPETAADARFARAHRLRYVFVAGEELTRTLADDALSALRPAAIENLYGPTEATVFATGYSYAAPIANGKVPIGRGLGNVRVYVLDERMRPMPVGMPGDLYIAGNGVARGYLNRDELTAQRFLPDPFTPGGSIYMTGDLARWTRDGTIEFLGRTDQQ…	TTCGATGCGCGCCTGCGTTCGTGTCCGGGGGCGACGGCCGTGTGGTTCGACAACGCGTCGATGACGTTCGCGCAGCTCGGCGAACGCGTCGATGCACTGGCTGGCCAGCTAGTTGAGCGAACCGGTGGCGAACCGAAGCGCATTGCGATTTGTCTCGAGCGCTCGTTTGAGATGGTGATTGCGGTTCTCGCAATACTGAAGGCCGGCTGTGCCTATGTCCCGCTCGACCCGCGGTTGCCGGCTGAGCGGATCGATTTCATGCTGGACGACAGCGCGGCGGCATTGCTGGTGACGGTTGCGTCGATCCGCGATGAACGGTTTGCTGCGCACCGTATCGAGACCCTGTGCATCGATGAGCGCGCACTGCGGGGCACGGCTTCTGCGCGCGCAGTGATGCCG…	C[C@H](C(=O)N[C@]1(CN(C1=O)S(=O)(=O)O)OC)NC(=O)CC[C@H](C(=O)O)N	['Sequence-based prediction', 'ACVS assay', 'Structure-based inference']	['pubmed:28017601']	Paraburkholderia
BGC0001790	NRP	Pseudomonas acidophila	sulfazecin	nrpspksdomains_sulM_AMP-binding.2	2,3-diaminopropionic acid	bz	FEDHAAATPERRALVYNDRAYSYDQLNRAANRIANRLMQAFPELGTDSLVGVRIARSDRLALTVLAIWKIGAAYIPIDPVLPAQRMHDMLDLAGAKALIVDASVAAAEPAVAGMPRIVFDDLVMDDPLLEDNPEVHLSGNDLSYVLFTSGSTGKPKGAMIEHIGMLNNIANKALDLAMDEDSRVAQNASMSFDVSVWQMFIALTKGGTTFVYDDRVVNDIAGLIQRMHTDSLTILEVVPTYLQALVEYMEEHPDCPRPAALTFMMVNGETVDAALLKRWFALCPASKVINAYGPTEASDDITHHIMSPGDEIVNPVPIGRALANFDIYIVDDELRPVPIGTRGEIVVTGVGVGRGYVGMAGVTAQAFVKSPFPDRYKGRLYRTGDLGAMREDGVLMFHG…	TTCGAAGATCACGCAGCGGCGACGCCTGAACGCCGCGCGCTGGTCTACAACGATCGCGCGTACAGCTACGACCAGTTGAATCGCGCCGCGAACCGGATCGCGAACCGGCTGATGCAGGCGTTCCCGGAGCTGGGCACGGACTCACTGGTTGGTGTGCGGATCGCGCGCAGCGACCGGCTGGCTCTGACGGTTCTCGCGATCTGGAAGATCGGCGCGGCCTATATTCCGATCGACCCCGTGCTGCCCGCGCAACGCATGCACGACATGCTCGATCTGGCGGGCGCGAAAGCCCTGATCGTCGATGCGTCCGTGGCGGCTGCAGAGCCGGCGGTTGCCGGTATGCCGCGCATCGTGTTCGACGATCTCGTGATGGACGACCCGCTGCTCGAGGACAATCCC…	C[C@H](C(=O)N[C@]1(CN(C1=O)S(=O)(=O)O)OC)NC(=O)CC[C@H](C(=O)O)N	['Sequence-based prediction', 'ACVS assay', 'Structure-based inference']	['pubmed:28017601']	Paraburkholderia
BGC0001833	NRP	Burkholderia gladioli	icosalide A	nrpspksdomains_icoS_AMP-binding.1	leucine	leu	EAQAGQMPEAIALVAGDEQLSYGELNARANRLARYLVKLGVGPDIPVAVCVERSVAMVVALLAVFKAGGAYLSIDPAYSSARLAHILDDAAPPVMLVDAFGREALGETRLAKHVMVNLSVSSAPWDDLPSDDLPPRSLGLDSSHLAYVIYTSGSTGTPKGVMVEHRQLSNLVTWHIDRFELHAGSRVPATASLAFDASVWELWPVLCAGASLLLPPPGLSSDAAALLNWWRQQSMDCAFLVTPLALLAMQSELPPGLKSLLIGGDRVTSLPSGLPPSLRIVNNYGPTETTVVATSGELEPSAGDTVYPIGKPIANTRIYLLDENQALVPLGAIGELYIGGAGVARGYLNRPDLTAQRFLADPFARAEGDAEARMYRTGDLARYQPDGNIVFLGRNDEQV…	GAGGCTCAGGCAGGGCAGATGCCCGAGGCGATTGCGCTGGTCGCGGGTGATGAGCAGCTTTCTTATGGCGAGCTCAATGCGCGTGCAAATCGGCTTGCTCGTTATCTCGTCAAGCTCGGCGTTGGACCGGATATTCCGGTTGCCGTGTGTGTGGAGCGAAGCGTCGCGATGGTTGTTGCGTTGCTTGCGGTGTTCAAGGCCGGTGGCGCTTACCTGTCGATCGATCCCGCTTATTCGAGTGCGCGCCTCGCTCATATCCTCGATGATGCGGCACCGCCCGTCATGCTGGTCGATGCGTTTGGACGTGAAGCGCTCGGCGAGACGCGTCTGGCCAAGCATGTGATGGTTAACTTGAGCGTGTCTTCTGCGCCGTGGGATGACTTGCCTTCGGATGATCTT…	CCCCCCCC1CC(=O)NC(CO)C(=O)NC(CC(C)C)C(=O)OC(CCCCC)CC(=O)NC(CC(C)C)C(=O)NC(CO)C(=O)O1	['Structure-based inference']	['doi:10.1021/acschembio.8b00600']	Burkholderia
BGC0001833	NRP	Burkholderia gladioli	icosalide A	nrpspksdomains_icoS_AMP-binding.2	serine	ser	FEAQVRRTPEAAALIAGDERLSYAELDARANRFARYLVDLGVGPDALVAVCLERSTTMVVSLLGILKAGGAYVPIDPAYPGPRIAHIVSDSAPAVVLVDPTGRKALVDALGDEKLAEYGLIDVGVASAPWDVLSSERLSPGELGLNPRHLAYVIYTSGSTGMPKGVQNEHDALVNRLTWMQEAYRLDERDTVLQKTPFSFDVSVWEFFWTLANGATLVMAEPGAHRDADYLTEIIAKHGVTTLHFVPSMLAGFLEAQDLTRCKTLSRIICSGEALPAPIARRCLERLPHAQLHNLYGPTEAAIDVTAFTCPPDFDAQAVPIGKPIANTRIYLLDERQAPVPLGAIGELYIGGVGVARGYLNRADLTAQRFLADPFARAAGHPEARMYRTGDLARYLPDG…	TTCGAGGCGCAGGTTCGGCGCACGCCCGAGGCTGCCGCGTTGATTGCCGGTGACGAGCGGCTGTCTTATGCCGAACTCGATGCGCGCGCGAATCGGTTTGCTCGGTACCTTGTCGATCTGGGCGTTGGTCCCGATGCGCTTGTTGCCGTTTGTCTCGAACGCAGCACGACGATGGTTGTTTCGCTGCTCGGCATCCTCAAGGCGGGCGGGGCTTATGTGCCGATCGATCCTGCTTATCCAGGGCCGCGCATCGCGCATATCGTTTCCGATTCCGCGCCTGCTGTCGTGCTAGTCGATCCGACAGGGCGCAAGGCGCTTGTCGATGCGCTCGGCGATGAGAAGCTGGCCGAGTATGGGCTGATCGATGTAGGTGTAGCGTCTGCACCTTGGGACGTTCTC…	CCCCCCCC1CC(=O)NC(CO)C(=O)NC(CC(C)C)C(=O)OC(CCCCC)CC(=O)NC(CC(C)C)C(=O)NC(CO)C(=O)O1	['Structure-based inference']	['doi:10.1021/acschembio.8b00600']	Burkholderia
BGC0001833	NRP	Burkholderia gladioli	icosalide A	nrpspksdomains_icoS_AMP-binding.3	serine	ser	FEAQVRRTPEAAALIAGDERLSYAELDARANRFARYLVDLGVGPDALVAVCLERSTTMVVSLLGILKAGGAYVPIDPAYPGPRIAHIVSDSAPAVVLVDPTGRKALVDALGDEKLAEYGLIDVGVASAPWDVLSSERLSPGELGLNPRHLAYVIYTSGSTGMPKGVQNEHDALVNRLTWMQEAYRLDERDTVLQKTPFSFDVSVWEFFWTLANGATLVMAEPGAHRDADYLTEIIAKHGVTTLHFVPSMLAGFLEAQDLTRCKTLSRIICSGEALPAPIARRCLERLPHAQLHNLYGPTEAAIDVTAFTCPPDFDAQAVPIGKPIANTRIYLLDERQAPVPLGAIGELYIGGVGVARGYLNRADLTAQRFLADPFARAAGHPEARMYRTGDLARYLPDG…	TTCGAGGCGCAGGTTCGGCGCACGCCCGAGGCTGCCGCGTTGATTGCCGGTGACGAGCGGCTGTCTTATGCCGAACTCGATGCGCGCGCGAATCGGTTTGCTCGGTACCTTGTCGATCTGGGCGTTGGTCCCGATGCGCTTGTTGCCGTTTGTCTCGAACGCAGCACGACGATGGTTGTTTCGCTGCTCGGCATCCTCAAGGCGGGCGGGGCTTATGTGCCGATCGATCCTGCTTATCCAGGGCCGCGCATCGCGCATATCGTTTCCGATTCCGCGCCTGCTGTCGTGCTAGTCGATCCGACAGGGCGCAAGGCGCTTGTCGATGCGCTCGGCGATGAGAAGCTGGCCGAGTATGGGCTGATCGATGTAGGTGTAGCGTCTGCACCTTGGGACGTTCTC…	CCCCCCCC1CC(=O)NC(CO)C(=O)NC(CC(C)C)C(=O)OC(CCCCC)CC(=O)NC(CC(C)C)C(=O)NC(CO)C(=O)O1	['Structure-based inference']	['doi:10.1021/acschembio.8b00600']	Burkholderia
BGC0001833	NRP	Burkholderia gladioli	icosalide A	nrpspksdomains_icoS_AMP-binding.4	leucine	leu	EAQAGQMPEAIALVAGDEQLSYGELNARANRLARYLVKLGVGPDIPVAVCVERSVAMVVALLAVFKAGGAYLSIDPAYSSARLAHILDDAAPPVMLVDAFGREALGETRLAKHVMVNLSVSSAPWDDLPSDDLPPRSLGLDSSHLAYVIYTSGSTGTPKGVMVEHRQLSNLVTWHIDRFELHAGSRVPATASLAFDASVWELWPVLCAGASLLLPPPGLSSDAAALLNWWRQQSMDCAFLVTPLALLAMQSELPPGLKSLLIGGDRVTSLPSGLPPSLRIVNNYGPTETTVVATSGEIEPSAGDTVYPIGKPIANTRIYLLDENQALIPLGAVGELYIGGAGVARGYLNRPDLTAQRFLADPFARAAGDAEARMYRTGDLARYQPDGNIVFLGRNDEQV…	GAGGCTCAGGCAGGGCAGATGCCCGAGGCGATTGCGCTGGTCGCGGGTGATGAGCAGCTTTCTTATGGCGAGCTCAATGCGCGTGCGAATCGGCTTGCTCGTTATCTCGTCAAGCTCGGCGTTGGACCGGATATTCCGGTTGCCGTGTGTGTGGAGCGAAGCGTCGCGATGGTTGTTGCGTTGCTTGCGGTGTTCAAGGCCGGTGGCGCTTACCTGTCGATCGATCCCGCTTATTCGAGTGCGCGCCTCGCTCATATCCTCGATGATGCGGCACCGCCCGTCATGCTGGTCGATGCGTTTGGACGTGAAGCGCTCGGCGAGACGCGTCTGGCCAAGCATGTGATGGTTAACTTGAGCGTGTCTTCTGCGCCGTGGGATGACTTGCCTTCGGATGATCTT…	CCCCCCCC1CC(=O)NC(CO)C(=O)NC(CC(C)C)C(=O)OC(CCCCC)CC(=O)NC(CC(C)C)C(=O)NC(CO)C(=O)O1	['Structure-based inference']	['doi:10.1021/acschembio.8b00600']	Burkholderia
BGC0001844	NRP	Paraburkholderia rhizoxinica HKI 454	holrhizin	nrpspksdomains_RBRH_RS16800_AMP-binding.1	valine	val	FEAQVEHTPEAMALVYEEQTLSYAELNARANRLAHQLIELGVMPDARVAICVQRSPAMVVGLLAILKAGGAYVPLDPSYPGERLAHILADAAPNIVLADAAGRAALGGAALTDRTVLDPNWLPAQAETNPVVPDLASRHLAYVIYTSGSTGMPKGVMVEHRSIARLVINNGYLDVGAADRVALAANPAFDASTFEVWAPLLNGAAAVVISRDTVLNPAAFAQTLQEQRISILWLTVGLFNQLFIELGPVFPQLKALIVGGDALDANVVAQVLQGTPPQQLINGYGPTESTTFTTTYRIDAIREDTLSIPIGRPIANTQIYLLDAYKQPVPLGAVGELYIGGAGVARGYLNRPELTAERFVRDPFVDEADARMYKTGDLARYLPDGNLEFLGRNDHQVKIR	TTTGAAGCGCAAGTGGAGCACACGCCCGAGGCGATGGCGTTGGTCTACGAGGAGCAAACGCTCAGTTACGCTGAGCTGAATGCGCGGGCCAACCGTCTGGCGCATCAGCTGATTGAGTTGGGTGTTATGCCGGATGCCCGGGTGGCGATCTGTGTGCAGCGCAGTCCTGCGATGGTGGTGGGGCTGCTGGCGATCCTGAAGGCGGGTGGGGCATATGTGCCGCTCGATCCAAGTTATCCAGGCGAGCGGCTCGCGCATATTCTCGCGGATGCGGCGCCGAACATTGTGTTGGCGGATGCAGCGGGCCGGGCGGCGCTGGGTGGGGCGGCCTTGACCGATCGCACGGTGCTGGACCCGAATTGGCTGCCGGCGCAGGCGGAGACGAATCCGGTGGTGCCG…		['Structure-based inference']	['doi:10.1039/C8OB01515E']	Mycetohabitans
BGC0001844	NRP	Paraburkholderia rhizoxinica HKI 454	holrhizin	nrpspksdomains_RBRH_RS16800_AMP-binding.2	phenylalanine	phe	FEAQVEHTPEAMALVYEEQTLSYAELNARANRLAHQLIELGVMPDARVAICVQRSPAMVVGLLAILKAGGAYVPLDPSYPGERLAHILADAAPNIVLADAAGRAALGGAALTDRTVLDPNWLPAQAETNPVVPDLTSRHLAYVIYTSGSTGTPKGVMVEHRGVVNLAQAQIACFDVHATSRIVQFASFSFDASVFEIFMALGCGASLHLPSDGVRYDRYRLWQYLTECGITHVTLPPALLQEGRDLPRLNQPLTAILAGEAPSVALFHNLMNQGVVVFNAYGPTETTVCVSAWRGLNLFNGKVLPIGRPLANTRVYLLDAHGQPVPLGAVGELYIGGAGVARGYLNRPELTAERFVRDPFASEPDARMYKTGDLARYLPDGNLEFLGRNDHQVKIR	TTTGAAGCGCAAGTGGAGCACACGCCCGAGGCGATGGCGTTGGTCTACGAGGAGCAAACGCTCAGTTACGCTGAGCTGAATGCGCGGGCCAACCGTCTGGCGCATCAGCTGATTGAGTTGGGTGTTATGCCGGATGCCCGGGTGGCGATCTGTGTGCAGCGCAGTCCTGCGATGGTGGTGGGGCTGCTGGCGATCCTGAAGGCGGGTGGGGCATATGTGCCGCTCGATCCAAGTTATCCAGGCGAGCGGCTCGCGCATATTCTCGCGGATGCGGCGCCGAACATTGTGTTGGCGGATGCAGCGGGCCGGGCGGCGCTGGGTGGGGCGGCCTTGACCGATCGCACGGTGCTGGACCCGAATTGGCTGCCGGCGCAGGCGGAGACGAATCCGGTGGTGCCG…		['Structure-based inference']	['doi:10.1039/C8OB01515E']	Mycetohabitans
BGC0001844	NRP	Paraburkholderia rhizoxinica HKI 454	holrhizin	nrpspksdomains_RBRH_RS16800_AMP-binding.3	glutamic acid	glu	FEAQVERTPEATALVYENQTLSYAELNDKANQLAHYLRALDVGPEVVVGLCAERSLEAIIGLLGILKAGGAYLPLDPSHPAERLASMLRQASVAVLVTQSHLEARLPEIQARRIDLDTDWAKIAACPKTRLDSGVTAEHLAYMIYTSGSTGQPKGVMHSHRGVVNYLSFLTRHYAITCADTILNITGLAFDPCVRDLFGPLTAGARVIILPNEQAKEPGRYLSAIRERSVTKLLSITPSFLRSLCETVPAGPIASSLNTILTSGEPLEASVCEQVHKAFGLQVTVVNQYGPSECTMASTWFKADAQQEGRVPIGRPVPNVRVYVLGRHLEPLPIGVTGELYIAGAGVARGYINQPELSAERFIPSPFGPGERLYRTGDLARWRLDGQLEYIGRLDQQIK…	TTTGAAGCGCAAGTGGAGCGCACGCCCGAGGCGACGGCGTTGGTCTATGAGAACCAGACGCTGAGCTACGCGGAATTAAACGATAAGGCAAACCAGCTGGCGCATTACCTGCGTGCCTTAGATGTGGGTCCGGAAGTCGTGGTGGGACTATGCGCCGAGCGCTCGCTTGAGGCAATCATTGGCCTATTAGGCATTCTGAAGGCGGGCGGTGCGTATTTGCCGCTGGATCCCAGCCATCCGGCCGAACGCTTAGCATCTATGTTGCGCCAGGCGAGCGTCGCGGTGTTGGTGACGCAATCCCACCTTGAAGCGAGGCTGCCTGAAATCCAGGCACGACGTATTGATCTGGATACGGACTGGGCCAAGATTGCCGCGTGTCCCAAGACACGACTGGACAGT…		['Structure-based inference']	['doi:10.1039/C8OB01515E']	Mycetohabitans
BGC0001844	NRP	Paraburkholderia rhizoxinica HKI 454	holrhizin	nrpspksdomains_RBRH_RS16800_AMP-binding.4	isoleucine	ile	FEAQVARTPEATALVYEDQTLSYAELNARANRLAHQLIELGVVPDARVAICVQRSPALVVGLLAILKAGGAYVPLDPTYPSERLAHILVDAAPSIVLADAAGRAALGEAALAECTVLDPATVPALPDTNPSVASLTSRHLAYVIYTSGSTGVPKGVMVHHQGVVRLVRNTDYIKVEPGAVFALASNLAFDATTFEIWTPLLNGARIEVIERETLLSPAMLSRKLKQSGVTVLFLTTALFNQMVKEKVEAFSDLHYLLFGGENADPRCVFRVLQQAKPRHLLHVYGPTETVTYASWYEVSNVKQDTSIPIGRPIANTRIYLLDRYGQPVPLGAVGELYIGGAGVARGYLNRPELTAERFVHDPFASEPDARMYKTGDLARYLPDGNLEFLGRNDHQVKIR	TTTGAAGCGCAGGTGGCGCGCACGCCTGAAGCCACAGCACTGGTGTATGAAGACCAGACGCTGAGTTACGCCGAGCTCAATGCCCGGGCGAATCGTCTCGCGCATCAGTTGATCGAACTGGGTGTTGTGCCGGATGCCCGGGTGGCGATCTGCGTGCAGCGCAGTCCCGCGTTGGTCGTCGGGCTGTTGGCGATTCTGAAAGCCGGCGGCGCGTATGTACCGCTCGATCCCACCTATCCGAGTGAGCGCTTGGCGCATATCCTCGTTGATGCGGCACCGAGCATTGTGCTCGCCGATGCGGCCGGGCGTGCTGCGTTGGGCGAGGCGGCGCTGGCCGAGTGCACGGTGCTCGATCCGGCTACCGTGCCGGCGTTGCCGGACACGAATCCGTCGGTGGCG…		['Structure-based inference']	['doi:10.1039/C8OB01515E']	Mycetohabitans
BGC0001844	NRP	Paraburkholderia rhizoxinica HKI 454	holrhizin	nrpspksdomains_RBRH_RS16800_AMP-binding.5	alanine	ala	FEAQAERMPEAIALVYEDQALSYTELNARANRLAHQLIELGVVPNARVAICVQRSPAMVVGLLAILKAGGAYVPLDPSYPGERLAHILMDAAPDIVLADAAGQVALGDAALAHRTVLDPNRLPAQRETNPSVPALTSRHLAYVIYTSGSTGIPKGVMVEHAQTVNFLFWALQTFTSAETQHTLLATSISFDLSIYECFVPLAQGSTVHLVEDALALMHHAQPVSLINTVPSALQSLLAHQADLSSAVTINMAGEPLKASLIKQVFEKTPVQRLCNLYGPSESTTYSTWLSIQRGAPFIESIGRPIANTRIYLLDRYGQPVPLGAVGELYIGGAGVARGYLNRPELTAERFVHDPFASEPDARMYKTGDLARYLPDGNLEFLGRNDHQVKIR	TTCGAAGCGCAGGCCGAGCGCATGCCTGAAGCCATAGCATTGGTGTACGAAGACCAAGCATTAAGCTACACGGAGCTCAATGCGCGGGCGAATCGCTTGGCACATCAGCTCATTGAACTGGGTGTTGTGCCGAATGCCCGGGTGGCGATCTGCGTGCAGCGCAGCCCGGCGATGGTGGTGGGGCTGCTGGCGATCCTGAAAGCGGGTGGCGCGTATGTGCCGCTTGACCCAAGCTATCCGGGCGAGCGGCTCGCGCATATTCTCATGGATGCGGCGCCGGATATTGTGTTGGCCGATGCAGCGGGCCAGGTGGCGTTGGGTGACGCGGCCTTGGCTCATCGCACGGTGCTCGATCCGAATAGGCTCCCGGCGCAGCGGGAGACGAATCCGTCGGTACCG…		['Structure-based inference']	['doi:10.1039/C8OB01515E']	Mycetohabitans
BGC0001844	NRP	Paraburkholderia rhizoxinica HKI 454	holrhizin	nrpspksdomains_RBRH_RS16800_AMP-binding.6	isoleucine	ile	FEAQAERMPEAIALVYEDQALSYTELNARANRLAHQLIELGVVPNARVAICVQRSPAMVVGLLAILKAGGAYVPLDPSYPGERLAHILMDAVPDIVLADAAGRAALGGAALAECTVLDPNRLPAQAETNPVVPDLTSRHLAYVIYTSGSTGVPKGVMVHHQGVVRLVRNTDYIKVEPGAVFALASNLAFDATTFEIWTPLLNGARIEVIERETLLSPAMLSRKLKQSGVTVLFLTTALFNQMVKEKVEAFSDLHYLLFGGENADPRCVFRVLQQAKPRHLLHVYGPTETVTYASWYEVSNVKQDTSIPIGRPIANTRIYLLDRYGQPVPLGAVGELYIGGAGVARGYLNRPELTAERFVHDPFASEPDARMYKTGDLARYLPDGNLEFLGRNDHQVKIR	TTTGAAGCGCAGGCCGAGCGCATGCCTGAAGCCATAGCATTGGTGTACGAAGACCAAGCATTAAGCTACACGGAGCTCAATGCGCGGGCGAATCGCTTGGCACATCAGCTCATTGAACTGGGTGTTGTGCCGAATGCCCGGGTGGCGATCTGCGTGCAGCGCAGCCCGGCGATGGTGGTGGGGCTGCTGGCGATCCTGAAAGCGGGTGGCGCGTATGTGCCGCTTGACCCAAGCTATCCGGGCGAGCGGCTCGCGCATATTCTCATGGATGCGGTGCCGGATATTGTGTTGGCCGATGCAGCGGGCCGGGCGGCGCTGGGTGGGGCGGCGCTGGCCGAGTGCACGGTGCTGGATCCGAATCGGCTGCCGGCGCAGGCGGAGACGAACCCGGTGGTGCCG…		['Structure-based inference']	['doi:10.1039/C8OB01515E']	Mycetohabitans
BGC0001999	NRP	Paraburkholderia graminis C4D1M	gramibactin	nrpspksdomains_BGRAMDRAFT_RS22640_AMP-binding.1	graminine	gra	AAQAKRTPQAIALRCEDESLTYAELDAWSAAVAARLVARGVGAERRVGLCVARGPALIAALLGIIRSGGAFVPLDPDYPAARLAQMIGDAGIVQVVADAASAARVAEVLAGCEVVEVGAMAVAAAAAEAHAKAQSQSQSNVASAAPRTGAARESLMGTETPQHSDAETMISTATEQESKPHTDIALHPDQLAYVLYTSGSTGRPKGVGVSHGALWTHLQDFLTTYGISDDDTVLHSSTINFDVALHETLPALLRGATVEMRGVQPWDLQSLSERLVKRRVTFARIPTALWQQWHRHAPPRAQLALRQVTVGGEALPGDALARWCDGPLADIRLDNLYGPTETTVAALCRRTVAADVHDVTVPIGHPYPGRTARVLDAFGDEAPVGGLGELCIGGPTVAR…	GCGGCGCAGGCAAAGCGTACGCCGCAGGCGATTGCGCTGCGCTGCGAAGATGAGTCGCTCACGTATGCTGAACTTGATGCGTGGTCGGCGGCGGTGGCTGCACGGCTTGTCGCGCGAGGTGTGGGTGCTGAGCGGCGCGTGGGATTGTGTGTTGCGCGAGGACCGGCGCTGATTGCGGCGTTGCTTGGAATTATTCGCTCCGGTGGTGCGTTCGTGCCGCTCGACCCGGATTACCCGGCCGCGCGCCTCGCGCAGATGATCGGCGATGCCGGGATCGTGCAGGTGGTGGCGGATGCGGCGAGCGCGGCGCGGGTTGCTGAGGTGCTTGCGGGGTGTGAAGTAGTGGAGGTAGGGGCAATGGCGGTAGCTGCGGCTGCTGCGGAAGCGCACGCGAAGGCG…		['Structure-based inference']	['doi:10.1038/s41589-018-0101-9']	Paraburkholderia
BGC0001999	NRP	Paraburkholderia graminis C4D1M	gramibactin	nrpspksdomains_BGRAMDRAFT_RS22645_AMP-binding.1	aspartic acid	asp	ERADAVALVDSDGPLSWHDLWAWSGRLAAALSDHGVRPGDHVVLALPRCSALVAAILAVWRLRACYVPLDPASPQARLRWQAEDCGARVVVMGGALGVVGDAKPAANASTNLFTTAATNSGANAALKSAAPSWLPDGIATLNPHTLRDATNSAALAAHLGDAAANPQRTDGILVWPAYVIYTSGSTGRPKGVVQSHAALAAYLRGVSERLPGDIASAAYLSTPAADLGHTSLFGALWHGWTLHLIDADIAADPDAFATYMHTHSVELLKIVPSHLDALLQAQLPERVLPRRCLVMGGEPAPTRLAERIEALRPECRLINHYGPTETAVGVLTRSGAQSRAATLPLGQPLAHVDARIVDADGNAVPKGAAGELCIGGASVAYGYLNRPSLTAERFVPDPD…	GAACGGGCCGACGCCGTTGCGCTTGTCGATAGCGACGGGCCGCTTTCGTGGCACGATTTGTGGGCGTGGTCGGGGCGGCTTGCCGCGGCGCTCTCCGATCACGGCGTGCGGCCGGGAGACCACGTGGTGCTCGCGTTACCGCGCTGCTCGGCGCTCGTCGCGGCGATACTGGCGGTGTGGCGATTGCGCGCGTGTTACGTGCCGCTCGATCCGGCGTCGCCGCAAGCGCGGCTGCGCTGGCAGGCTGAGGATTGCGGCGCGCGGGTGGTTGTGATGGGCGGGGCTTTGGGGGTAGTGGGCGACGCGAAGCCCGCAGCGAACGCTTCAACGAATCTCTTCACAACTGCCGCCACGAACTCAGGCGCTAACGCGGCACTAAAATCAGCCGCGCCCTCATGG…		['Structure-based inference', 'Sequence-based prediction']	['doi:10.1038/s41589-018-0101-9']	Paraburkholderia
BGC0001999	NRP	Paraburkholderia graminis C4D1M	gramibactin	nrpspksdomains_BGRAMDRAFT_RS22645_AMP-binding.2	threonine	thr	AQAHARPDAVALVDGDEEVTYAQLDAWSGAIAQELIRLGAGAEVRVGVAMQRSTALVASLLGVLRAGAAYVPLDPSYPAERLAHIVDDSQLRLIVTDAPSLAQHAALFGTRPTLDAVALRETLPNDEPLDVAMYPRPQQLAYVIYTSGSTGTPKGVGITHENIARLFDATQSRFAFDSSDVWTLFHSYAFDFSVWEIFGALVHGARLVIVPHWSAREPAAFHTLLREQRVTVLNQTPSAFMQLTHADDDNTLQSLRVVIFGGERLEPASLARWADGARRKGVLPTLVNMYGITETTVHVTHRALDDAGLRDARSMIGAPLDDLTLHVLDADMNRVPVGAVGELYVGGAGLARGYAGRAELTAQRFVPDPYGAPGARLYRSGDLARRLPDGDLEYLGRND…	GCGCAGGCGCATGCGCGGCCTGACGCTGTTGCACTCGTCGATGGCGATGAAGAGGTGACCTATGCGCAACTCGATGCGTGGTCGGGTGCGATTGCGCAGGAGTTGATTCGTCTCGGCGCGGGAGCGGAAGTGCGCGTAGGTGTCGCGATGCAGCGCTCGACGGCGCTGGTTGCGTCGTTGCTCGGCGTGCTCCGCGCGGGCGCGGCGTATGTGCCGCTCGATCCGTCGTATCCGGCGGAGCGCCTTGCGCATATCGTCGATGACTCGCAGTTGCGTCTGATCGTCACCGATGCGCCGAGTCTCGCGCAGCATGCGGCGTTGTTCGGCACGCGGCCGACGCTCGATGCTGTGGCGTTGCGCGAGACGTTGCCGAATGATGAGCCGCTCGACGTCGCGATG…		['Structure-based inference', 'Sequence-based prediction']	['doi:10.1038/s41589-018-0101-9']	Paraburkholderia
BGC0001999	NRP	Paraburkholderia graminis C4D1M	gramibactin	nrpspksdomains_BGRAMDRAFT_RS22645_AMP-binding.3	threonine	thr	AQTRARPDAVALIDGDEEVTYAQLDAWSGAIARELIRLGAGTEVRVGVAMQRSAALVASLLGVLRAGAAYVPLDPSYPAERLAHIVDDSQLRLIVTDAPSLAQHAALFGTRPTLDALALRDTLPNDEPLDVAMYPRPQQLAYVIYTSGSTGVPKGVGITHENIARLFDATQSRFAFDSSDVWTLFHSYAFDFSVWEIFGALVHGARLVIVPHWSAREPAAFHALLRKERVTVLNQTPSAFMQLTHADDDNTLQSLRVVIFGGERLEPASLARWADGARRKGVLPSLMNMYGITETTVHVTHRTLDYAALHDARSVIGAPLDDLTLHVLDADMNRVPVGAVGELYVGGAGLARGYAGRAELTAQRFVPDPYGAPGARLYRSGDLARRLPDGDLEYLGRND…	GCGCAGACGCGTGCGCGGCCCGATGCTGTTGCTCTGATCGATGGCGATGAAGAGGTGACGTATGCGCAACTCGATGCGTGGTCGGGTGCGATTGCGCGTGAGTTGATTCGTCTCGGCGCAGGAACTGAAGTGCGTGTGGGTGTCGCAATGCAGCGCTCGGCGGCGCTGGTTGCATCGCTGCTCGGCGTGTTGCGCGCGGGTGCCGCTTATGTGCCGCTCGATCCGTCGTATCCGGCGGAGCGCCTTGCGCATATCGTTGATGACTCGCAGTTGCGTCTGATCGTCACCGATGCGCCGAGTCTCGCGCAGCATGCGGCGTTGTTCGGCACGCGGCCGACGCTTGATGCTCTAGCGTTGCGCGATACGTTGCCGAATGATGAGCCGCTCGACGTCGCGATG…		['Structure-based inference', 'Sequence-based prediction']	['doi:10.1038/s41589-018-0101-9']	Paraburkholderia
BGC0001999	NRP	Paraburkholderia graminis C4D1M	gramibactin	nrpspksdomains_BGRAMDRAFT_RS22645_AMP-binding.4	graminine	gra	AAQAKRTPQAIALRCEDESLTYAELDAWSAAIASRLIARGVGAERRVGLCVARGPALIAALLGIVRSGGAFVPLDPDYPAARLAQMIGDAGIVQVVADAASAARVAEVLAECEVLDVGSQSLMEPESANHTDIALHPDQLAYVLYTSGSTGRPKGVGVSHGALWTHLRDFLTTYGISSDDTVLHSSTINFDVALHETLPALLRGATVEMRGMQPWDLQSLSERLVKRQVTFARIPTALWQQWHRHAPPRAQLALRQVTVGGEALPGDALARWRDGPLADIRLDNLYGPTETTVAALYRHTVADDVHEVTVPIGHPYPGRTARVFDAFGDEAPVGGLGELCIGGPTVARGYLGRAGLTAERFVPDPHGAPGARMYRSGDLCRMRADGTVEFLGRLDQQVK…	GCGGCGCAGGCAAAGCGCACGCCGCAGGCGATTGCGCTGCGCTGTGAAGATGAGTCGCTCACGTATGCTGAACTTGATGCGTGGTCGGCGGCAATTGCTTCGCGGCTCATCGCGCGAGGTGTGGGTGCTGAGCGGCGCGTGGGATTGTGTGTTGCGCGAGGACCGGCGCTGATTGCGGCGTTGCTTGGGATCGTACGCTCCGGTGGTGCGTTCGTGCCGCTGGACCCGGATTACCCGGCCGCGCGCCTCGCGCAGATGATCGGCGATGCCGGGATCGTGCAGGTGGTGGCGGATGCGGCGAGTGCGGCGCGGGTGGCGGAGGTGCTTGCTGAATGTGAAGTACTGGACGTGGGTTCGCAGTCACTGATGGAGCCGGAGTCAGCGAACCACACCGACATC…		['Structure-based inference']	['doi:10.1038/s41589-018-0101-9']	Paraburkholderia
BGC0001999	NRP	Paraburkholderia graminis C4D1M	gramibactin	nrpspksdomains_BGRAMDRAFT_RS22645_AMP-binding.5	glycine	gly	EAARVPQRVAVRQNGKAFDYATLARWSVAIDARLRVSGVAREERVAVCMRRSPALIASMLGVWRSGAAYVPLDPSFPAERLAGMLEDAGVARVIADEEGRARLGGALDNRIVLDAGSGEDALVHDAASALPPISPSTDSQLAYVIYTSGSTGRPKGVAVSHGALARLLASIGIAPGLHKDDVLLSVTTPSFDISLLEFCLPLTRGACVEMADAQTVADGMALARLIDESGATFMQATPSGWRLLIESGWQGASRGRLTGIAGGEPLPADLAAQLAQRGVELWNLYGPTETTIWSSCARVSGSGPITIGRALHANALRIVDASGQLTLQGGVGELCIGGENLARGYLGRAGLTAERFVPDPYGAPGARMYRTGDLCRERTDGEFECLGRIDQQVKLR	GAAGCCGCGCGCGTGCCGCAGCGCGTCGCGGTGCGCCAGAACGGCAAGGCCTTCGACTACGCGACGCTCGCCCGCTGGTCCGTCGCAATCGATGCACGCTTGCGCGTGAGCGGCGTCGCGCGAGAGGAGCGCGTGGCCGTCTGCATGCGCCGCTCGCCCGCGCTGATCGCGAGCATGCTCGGCGTGTGGCGAAGCGGCGCGGCTTATGTGCCGCTCGATCCGTCGTTCCCGGCCGAACGCCTCGCGGGCATGCTGGAAGATGCGGGCGTTGCGCGCGTCATCGCGGATGAGGAGGGCCGCGCGCGACTCGGTGGCGCGCTCGATAACCGCATTGTGCTCGACGCGGGAAGCGGTGAAGATGCCTTGGTCCACGACGCAGCAAGCGCACTGCCGCCCATA…		['Structure-based inference', 'Sequence-based prediction']	['doi:10.1038/s41589-018-0101-9']	Paraburkholderia
BGC0002048	NRP	Mycetohabitans rhizoxinica HKI 454	endopyrrole B	nrpspksdomains_RBRH_03864_AMP-binding.1	pyrrole-2-carboxylic acid	pro	DTTARQPSARALVDSDGSALSYAELSAAADRIAVFLHRKGVVAGDRVGLFMHKSAHTLAAIFGILRLGAAYVPTDAGSSSTRAATLFDDCDVRVIFTDPESARHLTQHAPQLKPRIVVMQPHHEEVNDPREDWQTLDMLHGEKHDYPRNPPDANRLAYILYTSGSSGVPKGVAISQRNAVSFVEWASAAFNVAAQDQVSSHAPLHFDLSIFDIYVSIKNGACIHLIDADLAASPRHLATFLSTRAITVWYSAPAILGMLAEQHKARNPAPNRLRLVLFAGEVFPIAKLRRLLQLWPQPAYYNLYGPTETNVCTAYRVPTPIPAERVEPLPIGHPCDHCDTIVVDEHQQPVPDGEAGLLCVAGPSVATGYWNAPEKTAQRFFQRNGQRWYNTGDIVRASP…	GACACGACGGCGCGACAGCCGAGCGCTCGTGCGCTCGTCGACTCCGACGGATCCGCGTTGAGCTATGCAGAACTTTCCGCTGCGGCCGATAGGATCGCCGTTTTTCTTCATCGCAAGGGGGTCGTTGCAGGGGATCGTGTCGGGCTTTTCATGCACAAAAGCGCGCACACGCTCGCGGCCATCTTCGGCATACTCCGGCTAGGCGCGGCCTATGTGCCCACAGACGCGGGCAGCTCAAGCACGCGTGCCGCCACCCTATTCGACGATTGCGATGTTCGGGTCATCTTCACCGATCCCGAGTCAGCACGACATTTAACACAACACGCCCCCCAGCTTAAACCACGCATAGTGGTGATGCAGCCACATCACGAGGAGGTGAACGACCCACGTGAGGACTGG…	CC(C)[C@H](NC(=O)[C@@H]1CCCN1C(=O)[C@@H](NC(=O)C1=CC=C[NH]1)C(C)C)C(=O)N[C@@H](C(=O)N[C@H](C(=O)N[C@H](CO)C(=O)N[C@@H](CC1=CC=C(O)C=C1)C(=O)O)[C@@H](C)O)C(C)C	['Structure-based inference']	['pubmed:21131495', 'pubmed:31283172']	Mycetohabitans
BGC0002048	NRP	Mycetohabitans rhizoxinica HKI 454	endopyrrole B	nrpspksdomains_RBRH_03867_AMP-binding.1	valine	val	FEAQVEQTPEAPALVYEDQTLSYAQLNARANRLAHQLIEWGVRPDTRVAICVQRSPALVVGLLAILKAGGAYVPLDPAYPGERLAHILTDAAPSMVLADAVGRAALGEAALAECTVLDPATLPALPDTNPSVAGLTARHLAYVIYTSGSTGTPKGVMVPHHAIARLVINNDFVDICTGDRVAFAANPAFDASTFEVWAPLLNGATVVVIDHDTVLMPAAFAHTLREQRISILWLTVGLFNQMAAQVDMAFSQLKALIVGGDVLDARWVAQVMRESPPEQLINGYGPTESTTFATIYKVTCVPERNASIPIGRPIANTRVYLLDAHSQPVPLGAVGELYIGGAGVARGYWNRPALTAERFVPDPFSEDADARLYKTGDLARYLPDGHLEFVGRNDEQVKIR	TTTGAAGCGCAGGTCGAGCAAACACCTGAGGCGCCGGCGCTGGTCTATGAGGATCAAACGTTGAGCTATGCACAGCTCAATGCACGAGCCAATCGCCTCGCGCACCAGTTGATCGAGTGGGGCGTCAGGCCGGACACGCGGGTGGCGATCTGCGTGCAGCGCTCGCCGGCGCTAGTTGTGGGGCTGCTGGCGATCCTCAAAGCGGGTGGCGCCTATGTGCCGCTCGATCCCGCCTATCCGGGTGAGCGCTTGGCGCACATCCTCACCGATGCGGCACCGAGCATGGTGCTCGCGGATGCGGTGGGGCGCGCTGCGTTGGGCGAGGCGGCGTTGGCCGAGTGCACGGTGCTCGATCCGGCCACCCTGCCGGCGTTGCCGGACACGAATCCGTCGGTGGCG…	CC(C)[C@H](NC(=O)[C@@H]1CCCN1C(=O)[C@@H](NC(=O)C1=CC=C[NH]1)C(C)C)C(=O)N[C@@H](C(=O)N[C@H](C(=O)N[C@H](CO)C(=O)N[C@@H](CC1=CC=C(O)C=C1)C(=O)O)[C@@H](C)O)C(C)C	['Structure-based inference']	['pubmed:21131495', 'pubmed:31283172']	Mycetohabitans
BGC0002048	NRP	Mycetohabitans rhizoxinica HKI 454	endopyrrole B	nrpspksdomains_RBRH_03867_AMP-binding.2	proline	pro	FEAQVERSPDATALVYEEQTLSYAQLNARANRLAHRLIELGVEPDARVAICVERSPAMVVGLLAIVKAGGACVPLDPAYPSERLAHILNDAAPTIVLADATGRATLGEAALACRTVLEPEVLLDQAVPNPRVAELTPRHLAYVIYTSGSTGKPKGVMIEHVQITRLFEVTQSNGTLNEDQALIERQRGYSLTPADRVLQKTPFNFDISIWELFGTLLNGATLVVADADVHKEPVALMDLIARQRITTVYFVPSMLSIFLDTEGVQRCTSVKHLICSGEALPGATAQRCQTLLPDAQVHNLYGPTENALGTTFWTCPAACAENTIPIGRPIVNTRVYLLDTHGQPVPLGAVGELYIGGAGVARGYWNRPELTAERFVRDPFVDEPDARMYKTGDLARYLL…	TTCGAGGCGCAGGTCGAGCGCAGTCCCGATGCTACTGCGCTGGTGTATGAAGAGCAGACACTAAGCTATGCGCAGCTCAATGCACGGGCCAATCGCCTTGCACATCGGCTCATTGAATTGGGTGTTGAGCCGGATGCACGAGTGGCAATCTGCGTCGAGCGCTCGCCGGCAATGGTCGTGGGGCTATTGGCGATCGTGAAGGCTGGCGGCGCTTGTGTGCCACTTGATCCTGCGTATCCGTCCGAGCGCCTTGCACATATTCTGAATGATGCAGCACCAACGATCGTCCTAGCTGATGCAACGGGCAGGGCCACGTTGGGGGAAGCGGCGCTTGCGTGCCGAACCGTACTTGAGCCTGAGGTACTGCTCGATCAAGCTGTACCCAATCCACGGGTAGCC…	CC(C)[C@H](NC(=O)[C@@H]1CCCN1C(=O)[C@@H](NC(=O)C1=CC=C[NH]1)C(C)C)C(=O)N[C@@H](C(=O)N[C@H](C(=O)N[C@H](CO)C(=O)N[C@@H](CC1=CC=C(O)C=C1)C(=O)O)[C@@H](C)O)C(C)C	['Structure-based inference']	['pubmed:21131495', 'pubmed:31283172']	Mycetohabitans
BGC0002048	NRP	Mycetohabitans rhizoxinica HKI 454	endopyrrole B	nrpspksdomains_RBRH_03867_AMP-binding.3	valine	val	FEAQVERTPEAPALVYEAQTLSYAQLNAQANRLAHQLIELGVKPDIRVAICVERSPALVVGLLAILKAGGAYVPLDPAYPGERLAHILTDAAPSMVLADAVGRAALGEAALAECTVLDPATPSTWPDTNPSIAELTARHLAYVIYTSGSTGTPKGVMVPHYAIARLVINNGYVDIRTGDRVAFAANPAFDASTFEVWAPLLNGATVVVIDHDTVLMPAAVCAHVARTAHQH	TTTGAGGCGCAGGTCGAGCGCACGCCCGAGGCGCCAGCGCTGGTATATGAAGCGCAGACACTGAGCTATGCGCAGCTGAACGCACAAGCTAATCGCTTGGCGCACCAGTTGATCGAGCTGGGTGTCAAGCCAGACATCCGGGTGGCGATCTGCGTTGAGCGCTCGCCGGCGCTAGTTGTGGGGCTGCTGGCGATCCTCAAAGCGGGTGGCGCCTATGTGCCGCTCGATCCCGCCTATCCGGGTGAGCGCTTGGCGCACATCCTCACCGATGCGGCACCGAGCATGGTGCTCGCGGATGCGGTGGGGCGCGCTGCGTTGGGCGAGGCGGCGCTGGCCGAGTGCACGGTGCTCGATCCAGCTACCCCGTCGACGTGGCCGGACACCAATCCGTCGATAGCC…	CC(C)[C@H](NC(=O)[C@@H]1CCCN1C(=O)[C@@H](NC(=O)C1=CC=C[NH]1)C(C)C)C(=O)N[C@@H](C(=O)N[C@H](C(=O)N[C@H](CO)C(=O)N[C@@H](CC1=CC=C(O)C=C1)C(=O)O)[C@@H](C)O)C(C)C	['Structure-based inference']	['pubmed:21131495', 'pubmed:31283172']	Mycetohabitans
BGC0002048	NRP	Mycetohabitans rhizoxinica HKI 454	endopyrrole B	nrpspksdomains_RBRH_04313_AMP-binding.1	valine	val	FEAQVERTPEAPALVYEDQTLSYAQLNARANRLAHQLIELGVKPDTRVAICVQRSAALVVGVLAILKAGGAYVPLDPSYPSERLAHILADAAPSMVLADAAGRAALGEAALAECTVLDPATPSTWPDTNPSIAELTARHLAYVIYTSGSTGTPKGVMVPHYAIARLVINNGYVDIRTDDRVAFAANPAFDASTFEVWAPLLNGATVVVIDHDTVLMPRAFAHTLREQRISILWLTVGLFNQMAAQVDTAFSQLKALIVGGDVLDARLVAQVMGESPPEQLINGYGPTESTTFATIYKVTCVPERNASIPIGRPIANTRVYLLDAHGQPVPLGAVGELYIGGAGVARGYWNRPELTAERFVRDPFSEDADARLYKTGDVARYLPDGNLEFVGRNDDQVKIR	TTTGAGGCGCAGGTCGAGCGTACGCCCGAGGCGCCGGCGCTGGTCTATGAGGATCAAACGTTGAGCTATGCGCAGCTCAATGCACGAGCCAATCGCTTGGCGCACCAGTTGATCGAGTTGGGCGTCAAGCCGGACACGCGGGTGGCGATCTGCGTGCAGCGCAGTGCTGCGCTGGTCGTGGGGGTGCTGGCGATTTTGAAGGCTGGGGGCGCGTATGTGCCGCTGGATCCGAGCTATCCGAGTGAGCGCTTGGCGCACATCCTCGCCGATGCGGCGCCGAGCATGGTGCTGGCCGATGCGGCCGGGCGCGCTGCGTTGGGCGAGGCGGCGCTGGCCGAGTGCACGGTGCTCGATCCAGCTACCCCGTCGACGTGGCCGGACACCAATCCGTCGATAGCC…	CC(C)[C@H](NC(=O)[C@@H]1CCCN1C(=O)[C@@H](NC(=O)C1=CC=C[NH]1)C(C)C)C(=O)N[C@@H](C(=O)N[C@H](C(=O)N[C@H](CO)C(=O)N[C@@H](CC1=CC=C(O)C=C1)C(=O)O)[C@@H](C)O)C(C)C	['Structure-based inference']	['pubmed:21131495', 'pubmed:31283172']	Mycetohabitans
BGC0002048	NRP	Mycetohabitans rhizoxinica HKI 454	endopyrrole B	nrpspksdomains_RBRH_04313_AMP-binding.2	threonine	thr	FEAQVERTPEAPALVFEDQTFSYAELNAQANRLAHQLIELGVKPDTRVAICVQRSAALVVGLLAILKAGGAYVPLDPAYPGERLAYILADAAPSMVLADAAGRAALGEAALAECTVLDPATLPALPDTNPSVAGLTARHLAYVIYTSGSTGTPKGVMVEHVQVARLFEATQPWYGFNEHDTWCLFHSFAFDFSVWELWGALRYGGKLVIVPHPIARSADAFYQLICEQGVTVLNQTPSAFKALMVSQAHSALTDQLRYVIFGGEALEPTSLQAWYATHDERYPQLINMYGITEVTVHVTYRPLRQQDSEQAGSLIGTRIPDLTIYLLDAHGQPVPLGAVGELYIGGAGVARGYWNRPALTAERFVPDPFSEDADARLYKTGDLARYLLDGHLEFVGRND…	TTTGAGGCGCAGGTCGAGCGCACGCCCGAGGCGCCAGCGCTGGTGTTTGAAGACCAAACGTTCAGTTACGCCGAGCTGAATGCACAGGCCAATCGCCTCGCACACCAGTTGATCGAGTTGGGCGTCAAGCCGGACACGCGGGTGGCGATCTGCGTGCAGCGCAGTGCCGCGCTGGTCGTGGGGCTATTGGCGATCTTGAAGGCCGGCGGCGCTTATGTGCCGCTCGATCCGGCGTATCCGGGCGAGCGCTTGGCGTACATTCTCGCTGATGCGGCGCCGAGCATGGTGCTGGCCGATGCGGCTGGGCGCGCTGCGTTAGGCGAAGCAGCGCTGGCCGAGTGCACGGTGCTCGATCCGGCTACCCTGCCGGCGTTGCCAGACACGAATCCGTCGGTGGCA…	CC(C)[C@H](NC(=O)[C@@H]1CCCN1C(=O)[C@@H](NC(=O)C1=CC=C[NH]1)C(C)C)C(=O)N[C@@H](C(=O)N[C@H](C(=O)N[C@H](CO)C(=O)N[C@@H](CC1=CC=C(O)C=C1)C(=O)O)[C@@H](C)O)C(C)C	['Structure-based inference']	['pubmed:21131495', 'pubmed:31283172']	Mycetohabitans
BGC0002048	NRP	Mycetohabitans rhizoxinica HKI 454	endopyrrole B	nrpspksdomains_RBRH_03984_AMP-binding.1	serine	ser	FEAQVERTPEAPALVYEDQTLSYAQLNARANRLAHQLIEWGVRPDTRVAICVQRSAALVVGLLAILKAGGAYVPLDPSYPSERLAHILADAAPSMVLADAVGRAALGEAALAECTVLDPATLPALPGTNPSVAGLTARHLAYVIYTSGSTGTPKGVQNEHQALVNRLVWMQQAYGLTTADRVLQKTPVSFDVSVWEFFWTLLNGATLVVAAPDVHKDPAALIELITRQRITTAHFVPSMLSLFLHNEGVQHCTSVKRLVCSGEALPGASVRLCQTLLPSAQLYNLYGPTEAAIDVTAWSCPANYTEDTVPIGRPIANTRIYLLDAPGQPVPLGAVGELYIGGAGVARGYWNRPALTAERFVPDPFSEDADARLYKTGDLARYLPDGNLEFVGRNDEQVK…	TTTGAGGCGCAGGTCGAGCGTACGCCCGAGGCGCCGGCGCTGGTCTATGAGGATCAAACGTTGAGCTATGCACAGCTCAATGCACGAGCCAATCGCCTCGCGCACCAGTTGATCGAGTGGGGCGTCAGGCCGGACACGCGGGTGGCGATCTGCGTGCAGCGCAGTGCTGCGCTGGTCGTGGGGTTGTTGGCGATTTTAAAGGCCGGGGGCGCGTATGTGCCGCTGGATCCGAGCTATCCGAGTGAGCGCTTGGCGCACATCCTCGCCGATGCGGCGCCGAGCATGGTGCTCGCGGATGCGGTGGGGCGCGCTGCGTTGGGCGAGGCGGCGTTGGCCGAGTGCACGGTGCTCGATCCGGCCACCTTGCCGGCGTTGCCGGGCACCAATCCGTCGGTGGCG…	CC(C)[C@H](NC(=O)[C@@H]1CCCN1C(=O)[C@@H](NC(=O)C1=CC=C[NH]1)C(C)C)C(=O)N[C@@H](C(=O)N[C@H](C(=O)N[C@H](CO)C(=O)N[C@@H](CC1=CC=C(O)C=C1)C(=O)O)[C@@H](C)O)C(C)C	['Structure-based inference']	['pubmed:21131495', 'pubmed:31283172']	Mycetohabitans
BGC0002048	NRP	Mycetohabitans rhizoxinica HKI 454	endopyrrole B	nrpspksdomains_RBRH_03984_AMP-binding.2	tyrosine	tyr	FEAQVERTPEAPALVYEAQTLSYAQLNAQANRLAHQLIELGVRPDARVAICVQRSAALVVGVLAILKAGGAYVPLDPAYPGERLAHILVDASPNIVLADAAGRAALGDAALASCTVLDPVTLPALPDTNPSVAGLTARHLAYVIYTSGSTGTPKGVMVEHRGVVNLALAQIACFGVQPTSRILQFASFSFDASASEIWMAFGSGAVLYLPLEAARQDRHALWDYLASHAITHATLPPALLQHGADLSSFGLSLTLILAGEAPSATLVRNLVDQSTVFNAYGPTETTVCATAWRGARDFSGAVPIGRPIANTRIYLLDAHSQPVPLGAVGELYIGGAGVARGYWNRPALTAERFVPDPFSEDADARLYKTGDLARYLPDGNLEFVGRNDEQVKIR	TTCGAAGCGCAGGTCGAGCGCACGCCCGAGGCGCCGGCGCTGGTGTATGAAGCGCAGACGCTGAGCTATGCGCAGCTGAACGCACAAGCTAATCGCCTCGCACACCAGTTGATCGAGTTGGGCGTCAGGCCCGATGCACGGGTGGCGATCTGCGTGCAGCGCAGTGCCGCGTTGGTCGTGGGGGTGCTGGCGATTTTAAAGGCTGGGGGTGCGTATGTGCCGCTGGATCCAGCGTATCCGGGCGAGCGCTTGGCGCACATTCTTGTTGATGCATCCCCGAACATTGTGCTCGCGGATGCGGCCGGGCGCGCTGCGTTAGGCGACGCGGCGCTCGCATCCTGCACGGTGCTCGATCCGGTTACCTTGCCGGCGTTGCCGGACACGAATCCGTCGGTGGCG…	CC(C)[C@H](NC(=O)[C@@H]1CCCN1C(=O)[C@@H](NC(=O)C1=CC=C[NH]1)C(C)C)C(=O)N[C@@H](C(=O)N[C@H](C(=O)N[C@H](CO)C(=O)N[C@@H](CC1=CC=C(O)C=C1)C(=O)O)[C@@H](C)O)C(C)C	['Structure-based inference']	['pubmed:21131495', 'pubmed:31283172']	Mycetohabitans
BGC0002048	NRP	Mycetohabitans rhizoxinica HKI 454	endopyrrole B	nrpspksdomains_RBRH_03984_AMP-binding.3	tyrosine	tyr	FEAQVERTPEAPALVYEDQTLSYAQLNARANRLAHQLIEWGVRPDTRVAICVQRSAALVVGLLAILKAGGAYVPLDPSYPSERLAHILADAAPSMVLADAVGRAALGEAALAECTVLDPATLPALPGTNPSVAGLTARHLAYVIYTSGSTGTPKGVMVEHRGMVNLALAQIACFGVQPTSRILQFASFSFDASASEIFMAFGSGVALYLPPEAARHDRHALRDYLASHAITHATLPPALLQHGTDLLSFGPSLTLILAGEAPSATLVRDLADQGTVFNAYGPTEATVCATVWRGARDFSGEVPIGRPIGNTRVYLLDAHSQPVPLGAVGELSIGGAGVARGYLNRPELTAERFVPDPFSEDADARLYKTGDVARYRADGNLEFLGRNDDQVKLR	TTTGAGGCGCAGGTCGAGCGCACGCCCGAGGCGCCGGCGCTGGTCTATGAGGATCAAACGTTGAGCTATGCACAGCTCAATGCACGAGCCAATCGCCTCGCGCACCAGTTGATCGAGTGGGGCGTCAGGCCGGACACGCGGGTGGCGATCTGCGTGCAGCGCAGTGCTGCGCTGGTCGTGGGGTTGTTGGCGATTTTAAAGGCCGGGGGCGCGTATGTGCCGCTGGATCCGAGCTATCCGAGTGAGCGCTTGGCGCACATCCTCGCCGATGCGGCGCCGAGCATGGTGCTGGCCGATGCGGTGGGGCGCGCTGCGTTGGGCGAGGCGGCGCTGGCCGAGTGCACGGTGCTCGATCCGGCCACCTTGCCGGCGTTGCCGGGCACCAATCCGTCGGTGGCG…	CC(C)[C@H](NC(=O)[C@@H]1CCCN1C(=O)[C@@H](NC(=O)C1=CC=C[NH]1)C(C)C)C(=O)N[C@@H](C(=O)N[C@H](C(=O)N[C@H](CO)C(=O)N[C@@H](CC1=CC=C(O)C=C1)C(=O)O)[C@@H](C)O)C(C)C	['Structure-based inference']	['pubmed:21131495', 'pubmed:31283172']	Mycetohabitans
BGC0002050	NRP_Polyketide	Burkholderia sp. B8(2020)	necroxime A	nrpspksdomains_necE_AMP-binding.1	glycine	gly	EQQAAETPDAQAVIDGHTAWTYRMLNERANRIAHHLRARGLAPGGRVALCMRRSADVVATLLAVMKAGGTYVPMDAAFPVERLQLMLDDAAPALVVTDHEATLPNSLTLGGAALVDLDAQSDEISLCPATPVSVTVPLDSIAYVIYTSGSTGRPKGVQIPHSALTNFLLSMRDKPGMSARDRLLAVTTISFDIAGLELYLPLVSGAVVVLASRDDAMDGLALQRRLAEHRITMMQATPTTWQMLVESGWQGAPGFTILCGGEPLPRVLAQRLSRCGARVWNLYGPTETTIWSCIGLVVDDGEQAVEPIGEPIRNTSLHIVDDALQPVSAGTIGELCIGGDGVATGYLNRPELNVQKFVQTRWGRLYRTGDLVRLTHDGKLEFHGRTDHQLKIR	GAGCAGCAGGCGGCCGAGACGCCCGATGCACAGGCGGTCATTGATGGCCACACGGCTTGGACATATCGCATGCTAAACGAGCGTGCGAACCGGATCGCACACCATTTGCGCGCACGCGGCCTTGCGCCCGGGGGGCGAGTGGCGCTGTGTATGCGACGCTCGGCCGATGTCGTCGCGACACTTCTTGCCGTAATGAAAGCGGGCGGAACCTACGTGCCGATGGATGCGGCATTTCCGGTTGAGCGTTTGCAACTGATGCTCGATGATGCAGCGCCAGCTTTGGTTGTTACCGATCACGAGGCAACGCTGCCTAACAGCCTCACACTCGGCGGTGCGGCACTTGTTGACCTCGACGCGCAATCGGACGAAATTTCCCTTTGTCCGGCGACCCCTGTATCC…	CON=CC=CC(=O)NC=CC[C@H]1C[C@@H](OC(=O)[C@H](CCCCN)NC(=O)C[C@@H](C)O)[C@H]2O[C@H]2[C@@H](O)C=CC2=C(C(=O)O1)C(O)=CC=C2	['Structure-based inference']	['pubmed:32040253']	Burkholderia
BGC0002050	NRP_Polyketide	Burkholderia sp. B8(2020)	necroxime A	nrpspksdomains_necC_AMP-binding.1	glycine	gly	FETVASARPDALAISDGERALSYAELNERSARLATYLGLRGIGPGEKVAIFMDRSIDLVVAMLAIAKAGAVYIPVDPGFPEQRLRGMLEDSATTLVLTHSALQSRAGTLVDHRCECVPLDAHWPQISMCDAQPFAPPLCDEQLAYVIYTSGSTGQPKGVMIGHRALTNFLLSMAEVPGMTHDDVLFAVTTHCFDISGLELLLPLVTGGQCWLCPTDVASDAHRLIAAIEHVKPTIMQATPTTWMMLFNAGWTNAEQIRILCGGEPLPETLKGFFERTSRDVWNMYGPTETTIWSTVGKLDAGQPVTIGRPIANTRVYIVRDDGSLSDVGEAGELCIAGLGLAQGYLNQLELTAEKFVDNPFEPSGKLYRTGDLARWQADGTIVHLGRIDNQVKIR	TTCGAAACAGTGGCGAGCGCACGGCCGGACGCGCTGGCAATCAGCGATGGCGAGCGTGCGCTCAGTTACGCCGAGCTAAACGAACGTAGCGCGCGCCTCGCCACCTACCTTGGTCTACGGGGGATCGGGCCTGGCGAGAAGGTAGCGATCTTCATGGACCGCTCGATCGATCTCGTGGTCGCCATGCTTGCAATCGCCAAGGCGGGCGCGGTCTATATACCGGTGGATCCTGGGTTTCCAGAGCAGCGGTTGCGCGGCATGCTCGAGGACAGCGCGACGACGCTCGTTCTTACGCACTCCGCACTGCAGTCTAGAGCGGGCACGCTCGTCGATCACCGATGCGAGTGCGTGCCACTGGACGCGCACTGGCCGCAAATTTCGATGTGCGACGCCCAGCCG…	CON=CC=CC(=O)NC=CC[C@H]1C[C@@H](OC(=O)[C@H](CCCCN)NC(=O)C[C@@H](C)O)[C@H]2O[C@H]2[C@@H](O)C=CC2=C(C(=O)O1)C(O)=CC=C2	['Structure-based inference']	['pubmed:32040253']	Burkholderia
BGC0002050	NRP_Polyketide	Burkholderia sp. B8(2020)	necroxime A	nrpspksdomains_necA_AMP-binding.1	lysine	lys	FEAQVERTPDATALIVENQTLSYKELNARANRLAHHLRALGVRPGSCVALYVQRSPEMVIGMLATLKAGGAYVPLDPTYPPERLADMVTDSTPVAVLSIQALHTAVAQRLGAGVPVLDLQAHAVQWRDRSANNLDAQEVGLNAHHLAYVIYTSGSTGRPKGVMIQHSGVVNQVTAMARALRLSAKDRALQFASLSFDTSVEEIFSTLTSGATLVLRSDTWLAGARQFWTLCEANRISVVNLPTQFWAQLIQEKAPIPDSVRVVIVGGDTLSASAWSAWFAGDGHRPRLLNTYGPTETTISATTHEVTRHDGRWRSIGRAIANTRIYILDAWMQPVPPGAVGELYIGGAGVARGYLNRPDLTLERFLPDPFTHVPDARMYKTGDMVRYLTDGTLEFLGRN…	TTCGAAGCGCAGGTGGAGCGCACACCGGACGCCACTGCGCTGATAGTCGAGAATCAGACGCTCAGTTATAAGGAGCTGAACGCGCGAGCCAACCGGCTCGCACACCATTTGAGGGCCTTGGGCGTACGTCCCGGCAGTTGCGTGGCGCTGTATGTGCAGCGCAGCCCGGAGATGGTGATTGGCATGCTCGCCACGCTCAAAGCGGGTGGCGCTTATGTGCCGCTAGATCCCACTTACCCACCCGAACGTCTTGCTGACATGGTGACGGACAGCACGCCAGTGGCCGTACTCAGCATACAAGCACTGCATACCGCCGTGGCACAACGCCTGGGAGCTGGTGTACCAGTACTGGATCTGCAGGCTCATGCTGTGCAATGGAGGGACCGGAGTGCAAACAAT…	CON=CC=CC(=O)NC=CC[C@H]1C[C@@H](OC(=O)[C@H](CCCCN)NC(=O)C[C@@H](C)O)[C@H]2O[C@H]2[C@@H](O)C=CC2=C(C(=O)O1)C(O)=CC=C2	['Structure-based inference']	['pubmed:32040253']	Burkholderia
BGC0002326	NRP	Mycetohabitans rhizoxinica	endopyrrole B	nrpspksdomains_RBRH_RS08115_AMP-binding.1	proline	pro	DTTARQPSARALVDSDGSALSYAELSAAADRIAVFLHRKGVVAGDRVGLFMHKSAHTLAAIFGILRLGAAYVPTDAGSSSTRAATLFDDCDVRVIFTDPESARHLTQHAPQLKPRIVVMQPHHEEVNDPREDWQTLDMLHGEKHDYPRNPPDANRLAYILYTSGSSGVPKGVAISQRNAVSFVEWASAAFNVAAQDQVSSHAPLHFDLSIFDIYVSIKNGACIHLIDADLAASPRHLATFLSTRAITVWYSAPAILGMLAEQHKARNPAPNRLRLVLFAGEVFPIAKLRRLLQLWPQPAYYNLYGPTETNVCTAYRVPTPIPAERVEPLPIGHPCDHCDTIVVDEHQQPVPDGEAGLLCVAGPSVATGYWNAPEKTAQRFFQRNGQRWYNTGDIVRASP…	GACACGACGGCGCGACAGCCGAGCGCTCGTGCGCTCGTCGACTCCGACGGATCCGCGTTGAGCTATGCAGAACTTTCCGCTGCGGCCGATAGGATCGCCGTTTTTCTTCATCGCAAGGGGGTCGTTGCAGGGGATCGTGTCGGGCTTTTCATGCACAAAAGCGCGCACACGCTCGCGGCCATCTTCGGCATACTCCGGCTAGGCGCGGCCTATGTGCCCACAGACGCGGGCAGCTCAAGCACGCGTGCCGCCACCCTATTCGACGATTGCGATGTTCGGGTCATCTTCACCGATCCCGAGTCAGCACGACATTTAACACAACACGCCCCCCAGCTTAAACCACGCATAGTGGTGATGCAGCCACATCACGAGGAGGTGAACGACCCACGTGAGGACTGG…		['Structure-based inference', 'Homology']	['pubmed:31283172', 'doi:10.1021/acschembio.9b00406']	Mycetohabitans
BGC0002326	NRP	Mycetohabitans rhizoxinica	endopyrrole B	nrpspksdomains_RBRH_RS08105_AMP-binding.1	valine	val	FEAQVEQTPEAPALVYEDQTLSYAQLNARANRLAHQLIEWGVRPDTRVAICVQRSPALVVGLLAILKAGGAYVPLDPAYPGERLAHILTDAAPSMVLADAVGRAALGEAALAECTVLDPATLPALPDTNPSVAGLTARHLAYVIYTSGSTGTPKGVMVPHHAIARLVINNDFVDICTGDRVAFAANPAFDASTFEVWAPLLNGATVVVIDHDTVLMPAAFAHTLREQRISILWLTVGLFNQMAAQVDMAFSQLKALIVGGDVLDARWVAQVMRESPPEQLINGYGPTESTTFATIYKVTCVPERNASIPIGRPIANTRVYLLDAHSQPVPLGAVGELYIGGAGVARGYWNRPALTAERFVPDPFSEDADARLYKTGDLARYLPDGHLEFVGRNDEQVKIR	TTTGAAGCGCAGGTCGAGCAAACACCTGAGGCGCCGGCGCTGGTCTATGAGGATCAAACGTTGAGCTATGCACAGCTCAATGCACGAGCCAATCGCCTCGCGCACCAGTTGATCGAGTGGGGCGTCAGGCCGGACACGCGGGTGGCGATCTGCGTGCAGCGCTCGCCGGCGCTAGTTGTGGGGCTGCTGGCGATCCTCAAAGCGGGTGGCGCCTATGTGCCGCTCGATCCCGCCTATCCGGGTGAGCGCTTGGCGCACATCCTCACCGATGCGGCACCGAGCATGGTGCTCGCGGATGCGGTGGGGCGCGCTGCGTTGGGCGAGGCGGCGTTGGCCGAGTGCACGGTGCTCGATCCGGCCACCCTGCCGGCGTTGCCGGACACGAATCCGTCGGTGGCG…		['Structure-based inference']	['pubmed:31283172', 'doi:10.1021/acschembio.9b00406']	Mycetohabitans
BGC0002326	NRP	Mycetohabitans rhizoxinica	endopyrrole B	nrpspksdomains_RBRH_RS08105_AMP-binding.2	proline	pro	FEAQVERSPDATALVYEEQTLSYAQLNARANRLAHRLIELGVEPDARVAICVERSPAMVVGLLAIVKAGGACVPLDPAYPSERLAHILNDAAPTIVLADATGRATLGEAALACRTVLEPEVLLDQAVPNPRVAELTPRHLAYVIYTSGSTGKPKGVMIEHVQITRLFEVTQSNGTLNEDQALIERQRGYSLTPADRVLQKTPFNFDISIWELFGTLLNGATLVVADADVHKEPVALMDLIARQRITTVYFVPSMLSIFLDTEGVQRCTSVKHLICSGEALPGATAQRCQTLLPDAQVHNLYGPTENALGTTFWTCPAACAENTIPIGRPIVNTRVYLLDTHGQPVPLGAVGELYIGGAGVARGYWNRPELTAERFVRDPFVDEPDARMYKTGDLARYLL…	TTCGAGGCGCAGGTCGAGCGCAGTCCCGATGCTACTGCGCTGGTGTATGAAGAGCAGACACTAAGCTATGCGCAGCTCAATGCACGGGCCAATCGCCTTGCACATCGGCTCATTGAATTGGGTGTTGAGCCGGATGCACGAGTGGCAATCTGCGTCGAGCGCTCGCCGGCAATGGTCGTGGGGCTATTGGCGATCGTGAAGGCTGGCGGCGCTTGTGTGCCACTTGATCCTGCGTATCCGTCCGAGCGCCTTGCACATATTCTGAATGATGCAGCACCAACGATCGTCCTAGCTGATGCAACGGGCAGGGCCACGTTGGGGGAAGCGGCGCTTGCGTGCCGAACCGTACTTGAGCCTGAGGTACTGCTCGATCAAGCTGTACCCAATCCACGGGTAGCC…		['Structure-based inference']	['pubmed:31283172', 'doi:10.1021/acschembio.9b00406']	Mycetohabitans
BGC0002326	NRP	Mycetohabitans rhizoxinica	endopyrrole B	nrpspksdomains_RBRH_RS08105_AMP-binding.3	valine	val	FEAQVERTPEAPALVYEAQTLSYAQLNAQANRLAHQLIELGVKPDIRVAICVERSPALVVGLLAILKAGGAYVPLDPAYPGERLAHILTDAAPSMVLADAVGRAALGEAALAECTVLDPATPSTWPDTNPSIAELTARHLAYVIYTSGSTGTPKGVMVPHYAIARLVINNGYVDIRTGDRVAFAANPAFDASTFEVWAPLLNGATVVVIDHDTVLMPAAFAHTLREQRISILWLTVGLFNQMAAQVDMAFSQLKALIVGGDVLDARWVAQVMRESPPEQLINGYGPTESTTFATIYKVTCVPERNASIPIGRPIANTRVYLLDAHSQPVPLGAVGELYIGGAGVARGYWNRPALTAERFVPDPFSEDADARLYKTGDLARYLPDGHLEFVGRNDEQVKIR	TTTGAGGCGCAGGTCGAGCGCACGCCCGAGGCGCCAGCGCTGGTATATGAAGCGCAGACACTGAGCTATGCGCAGCTGAACGCACAAGCTAATCGCTTGGCGCACCAGTTGATCGAGCTGGGTGTCAAGCCAGACATCCGGGTGGCGATCTGCGTTGAGCGCTCGCCGGCGCTAGTTGTGGGGCTGCTGGCGATCCTCAAAGCGGGTGGCGCCTATGTGCCGCTCGATCCCGCCTATCCGGGTGAGCGCTTGGCGCACATCCTCACCGATGCGGCACCGAGCATGGTGCTCGCGGATGCGGTGGGGCGCGCTGCGTTGGGCGAGGCGGCGCTGGCCGAGTGCACGGTGCTCGATCCAGCTACCCCGTCGACGTGGCCGGACACCAATCCGTCGATAGCC…		['Structure-based inference']	['pubmed:31283172', 'doi:10.1021/acschembio.9b00406']	Mycetohabitans
BGC0002326	NRP	Mycetohabitans rhizoxinica	endopyrrole B	nrpspksdomains_RBRH_RS08105_AMP-binding.4	valine	val	FEAQVERTPEAPALVYEDQTLSYAQLNARANRLAHQLIELGVKPDTRVAICVQRSAALVVGVLAILKAGGAYVPLDPSYPSERLAHILADAAPSMVLADAAGRAALGEAALAECTVLDPATPSTWPDTNPSIAELTARHLAYVIYTSGSTGTPKGVMVPHYAIARLVINNGYVDIRTDDRVAFAANPAFDASTFEVWAPLLNGATVVVIDHDTVLMPRAFAHTLREQRISILWLTVGLFNQMAAQVDTAFSQLKALIVGGDVLDARLVAQVMGESPPEQLINGYGPTESTTFATIYKVTCVPERNASIPIGRPIANTRVYLLDAHGQPVPLGAVGELYIGGAGVARGYWNRPELTAERFVRDPFSEDADARLYKTGDVARYLPDGNLEFVGRNDDQVKIR	TTTGAGGCGCAGGTCGAGCGTACGCCCGAGGCGCCGGCGCTGGTCTATGAGGATCAAACGTTGAGCTATGCGCAGCTCAATGCACGAGCCAATCGCTTGGCGCACCAGTTGATCGAGTTGGGCGTCAAGCCGGACACGCGGGTGGCGATCTGCGTGCAGCGCAGTGCTGCGCTGGTCGTGGGGGTGCTGGCGATTTTGAAGGCTGGGGGCGCGTATGTGCCGCTGGATCCGAGCTATCCGAGTGAGCGCTTGGCGCACATCCTCGCCGATGCGGCGCCGAGCATGGTGCTGGCCGATGCGGCCGGGCGCGCTGCGTTGGGCGAGGCGGCGCTGGCCGAGTGCACGGTGCTCGATCCAGCTACCCCGTCGACGTGGCCGGACACCAATCCGTCGATAGCC…		['Structure-based inference']	['pubmed:31283172', 'doi:10.1021/acschembio.9b00406']	Mycetohabitans
BGC0002326	NRP	Mycetohabitans rhizoxinica	endopyrrole B	nrpspksdomains_RBRH_RS08105_AMP-binding.5	threonine	thr	FEAQVERTPEAPALVFEDQTFSYAELNAQANRLAHQLIELGVKPDTRVAICVQRSAALVVGLLAILKAGGAYVPLDPAYPGERLAYILADAAPSMVLADAAGRAALGEAALAECTVLDPATLPALPDTNPSVAGLTARHLAYVIYTSGSTGTPKGVMVEHVQVARLFEATQPWYGFNEHDTWCLFHSFAFDFSVWELWGALRYGGKLVIVPHPIARSADAFYQLICEQGVTVLNQTPSAFKALMVSQAHSALTDQLRYVIFGGEALEPTSLQAWYATHDERYPQLINMYGITEVTVHVTYRPLRQQDSEQAGSLIGTRIPDLTIYLLDAHGQPVPLGAVGELYIGGAGVARGYWNRPALTAERFVPDPFSEDADARLYKTGDLARYLLDGHLEFVGRND…	TTTGAGGCGCAGGTCGAGCGCACGCCCGAGGCGCCAGCGCTGGTGTTTGAAGACCAAACGTTCAGTTACGCCGAGCTGAATGCACAGGCCAATCGCCTCGCACACCAGTTGATCGAGTTGGGCGTCAAGCCGGACACGCGGGTGGCGATCTGCGTGCAGCGCAGTGCCGCGCTGGTCGTGGGGCTATTGGCGATCTTGAAGGCCGGCGGCGCTTATGTGCCGCTCGATCCGGCGTATCCGGGCGAGCGCTTGGCGTACATTCTCGCTGATGCGGCGCCGAGCATGGTGCTGGCCGATGCGGCTGGGCGCGCTGCGTTAGGCGAAGCAGCGCTGGCCGAGTGCACGGTGCTCGATCCGGCTACCCTGCCGGCGTTGCCAGACACGAATCCGTCGGTGGCA…		['Structure-based inference']	['pubmed:31283172', 'doi:10.1021/acschembio.9b00406']	Mycetohabitans
BGC0002326	NRP	Mycetohabitans rhizoxinica	endopyrrole B	nrpspksdomains_RBRH_RS16740_AMP-binding.1	serine	ser	FEAQVERTPEAPALVYEDQTLSYAQLNARANRLAHQLIEWGVRPDTRVAICVQRSAALVVGLLAILKAGGAYVPLDPSYPSERLAHILADAAPSMVLADAVGRAALGEAALAECTVLDPATLPALPGTNPSVAGLTARHLAYVIYTSGSTGTPKGVQNEHQALVNRLVWMQQAYGLTTADRVLQKTPVSFDVSVWEFFWTLLNGATLVVAAPDVHKDPAALIELITRQRITTAHFVPSMLSLFLHNEGVQHCTSVKRLVCSGEALPGASVRLCQTLLPSAQLYNLYGPTEAAIDVTAWSCPANYTEDTVPIGRPIANTRIYLLDAPGQPVPLGAVGELYIGGAGVARGYWNRPALTAERFVPDPFSEDADARLYKTGDLARYLPDGNLEFVGRNDEQVK…	TTTGAGGCGCAGGTCGAGCGTACGCCCGAGGCGCCGGCGCTGGTCTATGAGGATCAAACGTTGAGCTATGCACAGCTCAATGCACGAGCCAATCGCCTCGCGCACCAGTTGATCGAGTGGGGCGTCAGGCCGGACACGCGGGTGGCGATCTGCGTGCAGCGCAGTGCTGCGCTGGTCGTGGGGTTGTTGGCGATTTTAAAGGCCGGGGGCGCGTATGTGCCGCTGGATCCGAGCTATCCGAGTGAGCGCTTGGCGCACATCCTCGCCGATGCGGCGCCGAGCATGGTGCTCGCGGATGCGGTGGGGCGCGCTGCGTTGGGCGAGGCGGCGTTGGCCGAGTGCACGGTGCTCGATCCGGCCACCTTGCCGGCGTTGCCGGGCACCAATCCGTCGGTGGCG…		['Structure-based inference']	['pubmed:31283172', 'doi:10.1021/acschembio.9b00406']	Mycetohabitans
BGC0002326	NRP	Mycetohabitans rhizoxinica	endopyrrole B	nrpspksdomains_RBRH_RS16740_AMP-binding.2	tyrosine	tyr	FEAQVERTPEAPALVYEAQTLSYAQLNAQANRLAHQLIELGVRPDARVAICVQRSAALVVGVLAILKAGGAYVPLDPAYPGERLAHILVDASPNIVLADAAGRAALGDAALASCTVLDPVTLPALPDTNPSVAGLTARHLAYVIYTSGSTGTPKGVMVEHRGVVNLALAQIACFGVQPTSRILQFASFSFDASASEIWMAFGSGAVLYLPLEAARQDRHALWDYLASHAITHATLPPALLQHGADLSSFGLSLTLILAGEAPSATLVRNLVDQSTVFNAYGPTETTVCATAWRGARDFSGAVPIGRPIANTRIYLLDAHSQPVPLGAVGELYIGGAGVARGYWNRPALTAERFVPDPFSEDADARLYKTGDLARYLPDGNLEFVGRNDEQVKIR	TTCGAAGCGCAGGTCGAGCGCACGCCCGAGGCGCCGGCGCTGGTGTATGAAGCGCAGACGCTGAGCTATGCGCAGCTGAACGCACAAGCTAATCGCCTCGCACACCAGTTGATCGAGTTGGGCGTCAGGCCCGATGCACGGGTGGCGATCTGCGTGCAGCGCAGTGCCGCGTTGGTCGTGGGGGTGCTGGCGATTTTAAAGGCTGGGGGTGCGTATGTGCCGCTGGATCCAGCGTATCCGGGCGAGCGCTTGGCGCACATTCTTGTTGATGCATCCCCGAACATTGTGCTCGCGGATGCGGCCGGGCGCGCTGCGTTAGGCGACGCGGCGCTCGCATCCTGCACGGTGCTCGATCCGGTTACCTTGCCGGCGTTGCCGGACACGAATCCGTCGGTGGCG…		['Structure-based inference']	['pubmed:31283172', 'doi:10.1021/acschembio.9b00406']	Mycetohabitans
BGC0002326	NRP	Mycetohabitans rhizoxinica	endopyrrole B	nrpspksdomains_RBRH_RS16740_AMP-binding.3	tyrosine	tyr	FEAQVERTPEAPALVYEDQTLSYAQLNARANRLAHQLIEWGVRPDTRVAICVQRSAALVVGLLAILKAGGAYVPLDPSYPSERLAHILADAAPSMVLADAVGRAALGEAALAECTVLDPATLPALPGTNPSVAGLTARHLAYVIYTSGSTGTPKGVMVEHRGMVNLALAQIACFGVQPTSRILQFASFSFDASASEIFMAFGSGVALYLPPEAARHDRHALRDYLASHAITHATLPPALLQHGTDLLSFGPSLTLILAGEAPSATLVRDLADQGTVFNAYGPTEATVCATVWRGARDFSGEVPIGRPIGNTRVYLLDAHSQPVPLGAVGELSIGGAGVARGYLNRPELTAERFVPDPFSEDADARLYKTGDVARYRADGNLEFLGRNDDQVKLR	TTTGAGGCGCAGGTCGAGCGCACGCCCGAGGCGCCGGCGCTGGTCTATGAGGATCAAACGTTGAGCTATGCACAGCTCAATGCACGAGCCAATCGCCTCGCGCACCAGTTGATCGAGTGGGGCGTCAGGCCGGACACGCGGGTGGCGATCTGCGTGCAGCGCAGTGCTGCGCTGGTCGTGGGGTTGTTGGCGATTTTAAAGGCCGGGGGCGCGTATGTGCCGCTGGATCCGAGCTATCCGAGTGAGCGCTTGGCGCACATCCTCGCCGATGCGGCGCCGAGCATGGTGCTGGCCGATGCGGTGGGGCGCGCTGCGTTGGGCGAGGCGGCGCTGGCCGAGTGCACGGTGCTCGATCCGGCCACCTTGCCGGCGTTGCCGGGCACCAATCCGTCGGTGGCG…		['Structure-based inference']	['pubmed:31283172', 'doi:10.1021/acschembio.9b00406']	Mycetohabitans
BGC0002327	NRP	Burkholderia gladioli	bolagladin A	nrpspksdomains_bolH_AMP-binding.1	serine	ser	FAQQVARTPEAIAVTAGAASLSYAELERRANRLAHRLRALGAGPDRVIGVFAERSLAMMVALLGTLKAGAAYLPLDPEHPAERLAYLLDDARVPIVLSQAHLLERLPATQAARVTLDEAGDTSEDGEQGERDTDALAAHPCEAPPELAAPHHAAYVIYTSGSTGRPKGVLVEHRGIVNRLAWMQKAYRLDARDRVLQKTPFGFDVSVWELFWPLLEGARLVMAEPGGHRDPAYLARTIDAERISVMHFVPSMLDAFLEHAPANCGASLRDVMCSGEALRADTQNRFLTRFGARLHNLYGPTEASVDVSFWPCRLDTETASVPIGAPIDNLRLYVLDRALQPQPAGVAGELYLAGVGLARGYLNRPALTAERFVANPFTPGERMYRTGDLARWRADGQVE…	TTCGCGCAGCAAGTGGCGCGCACGCCCGAGGCGATCGCCGTCACCGCCGGCGCGGCCTCGCTCAGCTATGCCGAACTCGAGCGTCGCGCCAACCGCCTCGCGCATCGGCTGCGCGCGCTCGGCGCCGGCCCCGACCGCGTGATCGGCGTATTCGCCGAGCGCTCGCTGGCGATGATGGTGGCCCTGCTCGGCACGCTCAAGGCCGGCGCAGCCTACCTGCCGCTCGACCCGGAACATCCCGCCGAGCGGCTCGCCTACCTGCTCGACGACGCGCGCGTGCCGATCGTGCTGAGCCAGGCGCATCTGCTGGAGCGCCTGCCCGCGACGCAGGCGGCGCGGGTGACGCTCGACGAGGCCGGCGACACCAGCGAGGACGGCGAACAGGGCGAACGCGATACC…	COC(CCCC/C=C\CCCCCCC/C=C\C(=O)N/C=C/C(=O)N[C@H]1COC(=O)[C@H](CO)NC(=O)[C@H](CCO)NC(=O)[C@@H](C(C)C)NC1=O)(CC(=O)O)C(=O)O	['Structure-based inference']	['pubmed:32780428', 'doi:10.1002/anie.202009107']	Burkholderia
BGC0002327	NRP	Burkholderia gladioli	bolagladin A	nrpspksdomains_bolH_AMP-binding.2	isoleucine	ile	FEAQAARTPEAIALIHGERRLSFAELEALANRIAHRLIARGVRPGERVVIVLERGVPLVAAQLAVLKAGATYVPINTQTPAERQAWIVEDCGAALVLTEDGAPIPGSRVATLAIGAIAEPGPDRDAELPPALALSSELPAYAMYTSGSTGTPKGVLIPHRAINRLAINSSFASYGPGDRMAFCSNPAFDANTLEVWPALLNGAAVVIVDQQALLSAQAFREVLEAQQVNTIWLTVGLFNQIAATLAPIFPRFKTVMVGGDTLDPAKIAEVLRGTPPQRLVNGYGPTETTVFALVHPIESVDARAIPIGRPIPNTRIYLLDADRRPVPIGAPGEIFIGGPGVGLGYLNRPELSAERFLDDPFSAVPGARMYRSGDLGRYRADGNLEFLARTDQQVKIR	TTCGAGGCGCAGGCGGCGCGCACGCCGGAGGCGATCGCGCTGATCCACGGCGAACGACGCCTGAGCTTCGCCGAACTGGAGGCGCTGGCGAACCGCATCGCCCATCGCCTGATCGCGCGCGGCGTGAGGCCCGGCGAACGCGTGGTGATCGTGCTCGAGCGCGGCGTGCCGCTGGTGGCCGCGCAGCTCGCGGTGCTGAAGGCCGGCGCCACCTATGTGCCGATCAACACGCAGACGCCGGCCGAGCGCCAGGCCTGGATCGTCGAGGATTGCGGCGCCGCCCTGGTGCTGACCGAGGACGGCGCGCCGATCCCCGGCAGCCGGGTCGCGACGCTGGCGATCGGCGCGATCGCCGAACCGGGCCCGGATCGCGATGCGGAGCTGCCCCCCGCGCTCGCG…	COC(CCCC/C=C\CCCCCCC/C=C\C(=O)N/C=C/C(=O)N[C@H]1COC(=O)[C@H](CO)NC(=O)[C@H](CCO)NC(=O)[C@@H](C(C)C)NC1=O)(CC(=O)O)C(=O)O	['Structure-based inference']	['pubmed:32780428', 'doi:10.1002/anie.202009107']	Burkholderia
BGC0002327	NRP	Burkholderia gladioli	bolagladin A	nrpspksdomains_bolH_AMP-binding.3	homoserine	ser	EAQAAATPEAIALVADEESWTYAQLNARANRLAHRLIEAGVVPDARVAICAERSPAMVLAILAVLKAGGAYVPIDVNYPAERIAHILEDAAPVLVLADAAGREALRERDGSRVLDLDAPLPDTLCAEDPHVPDLGAASLIYVIYTSGSTGKPKGVMLEHGSFRNLMHWYLEDVGLDASDRVLLASSYSFDLTQKNILGPLMVGGSLHLTRAFFDPPALVARIRHWGITHLNLSPSAFHALADADLDGRAIASLRRVVLGGEPLSLSRLRTLPAPRPEIINSYGPTECADVIGWHRLAEDLERYDGASAPLGKPLRNARLYLLDAARRPVPLGAVGELYLGGVGVARGYLNRPELSAERFLDNPFGPGRLYRSGDLARWRADGELEYLGRDDHQVKIR	GAGGCCCAGGCGGCCGCCACGCCCGAGGCGATCGCGCTGGTCGCCGACGAGGAAAGCTGGACCTACGCGCAGCTCAACGCGCGCGCCAACCGGCTCGCCCACCGGCTGATCGAGGCCGGCGTGGTGCCCGACGCGCGCGTGGCGATCTGCGCCGAGCGCAGCCCGGCGATGGTGCTGGCGATCCTCGCGGTGCTGAAGGCCGGCGGCGCCTATGTGCCGATCGACGTCAACTACCCCGCCGAGCGGATCGCGCACATCCTCGAGGACGCCGCCCCGGTGCTGGTGCTGGCCGACGCGGCCGGCCGCGAGGCGCTGCGCGAGCGCGACGGCAGCCGCGTGCTCGACCTCGACGCGCCGCTGCCCGACACGCTCTGCGCCGAGGACCCGCATGTGCCGGAC…	COC(CCCC/C=C\CCCCCCC/C=C\C(=O)N/C=C/C(=O)N[C@H]1COC(=O)[C@H](CO)NC(=O)[C@H](CCO)NC(=O)[C@@H](C(C)C)NC1=O)(CC(=O)O)C(=O)O	['Structure-based inference']	['pubmed:32780428', 'doi:10.1002/anie.202009107']	Burkholderia
BGC0002327	NRP	Burkholderia gladioli	bolagladin A	nrpspksdomains_bolH_AMP-binding.4	serine	ser	FEQQVRATPAAIALRDGASGAALSYAELNARANRLAHRLIALGVGPDRLVAICAARGVDMVVGLLAILKAGGAYVPLDPSYPAERLAYMLEDARPVLLLADAAGRAALAGGDTAHGGDDAAALPASAPASAPPSLALDAALPGDPADSDPAPAALDADSLAYVIYTSGSTGKPKGALNAHRGVVNRLAWMQHAYALDAGDAVLQKTPFGFDVSVWEFFWPLMTGATLVMAPPESHKDPRALIELIVAHGISTLHFVPSMLSSFLDMDEAARCTSLKRIVCSGEALPAASVRRCRRALPRAALHNLYGPTEAAIDVTAWTCPADFAGEVVPIGKPIANLRIYLLDAHGQPVPRGAAGELHIGGVGVGRGYLNRPELSAERFVHDPFAAEAGARMYRTGDL…	TTCGAGCAGCAGGTGCGCGCCACGCCCGCGGCCATCGCGCTGCGCGATGGCGCGAGCGGCGCCGCGCTGTCCTATGCCGAGCTCAACGCGCGGGCCAATCGCCTGGCGCACCGGCTGATCGCGCTCGGCGTCGGCCCCGACCGGCTGGTGGCGATCTGCGCGGCGCGCGGCGTGGACATGGTGGTGGGGCTGCTGGCGATCCTCAAGGCGGGCGGCGCCTACGTGCCGCTCGACCCGAGCTACCCGGCCGAGCGCCTGGCCTACATGCTGGAGGATGCGCGGCCGGTGCTGCTGCTGGCCGACGCGGCCGGCCGCGCGGCCCTGGCCGGGGGCGATACGGCGCATGGCGGGGACGATGCCGCTGCACTGCCTGCCTCAGCGCCTGCCTCAGCGCCGCCC…	COC(CCCC/C=C\CCCCCCC/C=C\C(=O)N/C=C/C(=O)N[C@H]1COC(=O)[C@H](CO)NC(=O)[C@H](CCO)NC(=O)[C@@H](C(C)C)NC1=O)(CC(=O)O)C(=O)O	['Structure-based inference']	['pubmed:32780428', 'doi:10.1002/anie.202009107']	Burkholderia
BGC0002327	NRP	Burkholderia gladioli	bolagladin A	nrpspksdomains_bolO_AMP-binding.1	aspartic acid branched	asp	EDSARRWPHHPAFADSKREASYARLAQAVAHGAAALLAAGAAPGERIAILGPKQFETVVAILAANAIGALFVPINPQLKEAQIEHIVADSGASLLLAGAERLKRMPALAARMASRTLPMEAFAEAIHAGGAIVDSPTTSAARRLVDDDPAALLYTSGSTGKPKGVVVSQRNLVSGAFSVAAYQGLEAHDVILGVLPLSFDAGLSQLTTALVSGACYAPLDFLRPSEVPKYCEARGVTSITAVPPLWMQLASVEWSEAARQRIRRFANTGGHLATPLLNRLEALYPRAAPYLMYGLTEAFRSTYLPPAEARQRPSSIGKAVPNAEILVLRADGSECGVDEPGELVHRGAFVTLGYWNQPELTAQRFRPLPSRHGEIPRHGVGVWSGDIVRRDAQGYLYFV…	GAGGACAGCGCGCGCCGCTGGCCGCATCACCCGGCCTTTGCCGACAGCAAGCGCGAGGCGAGCTACGCCCGGCTCGCGCAGGCCGTCGCGCACGGCGCCGCCGCCCTGCTCGCGGCCGGCGCCGCGCCCGGCGAGCGGATCGCCATCCTCGGCCCCAAGCAGTTCGAGACGGTGGTGGCGATCCTGGCCGCCAACGCGATCGGCGCGCTGTTCGTGCCGATCAATCCGCAGTTGAAGGAAGCGCAGATCGAACACATCGTCGCCGACAGCGGCGCCAGCCTGTTGCTGGCCGGCGCGGAGCGGCTCAAGCGCATGCCGGCGCTGGCCGCGCGAATGGCCTCGCGAACGCTGCCGATGGAGGCCTTCGCCGAGGCGATCCATGCCGGCGGGGCCATCGTC…	COC(CCCC/C=C\CCCCCCC/C=C\C(=O)N/C=C/C(=O)N[C@H]1COC(=O)[C@H](CO)NC(=O)[C@H](CCO)NC(=O)[C@@H](C(C)C)NC1=O)(CC(=O)O)C(=O)O	['Structure-based inference']	['pubmed:32780428', 'doi:10.1002/anie.202009107']	Burkholderia
BGC0002329	NRP	Trinickia caryophylli	trinickiabactin	nrpspksdomains_FNF07_04275_AMP-binding.1	3R-hydroxyaspartic acid	asp	YVIYTSGSTGRPKGVVLNHAALAAYLRGVAGRLPDDIASAAWISTPAADLGHTSLFGALWHGWTLHAIDAEVAGDPDAFAAYMDTHAVDLLKIVPSHLDALMQGRSPAAALPRRCLVVGGEPMPARLATQVERLRPNCVLMNHYGPTETAVGVLARTGDVGRASTLPLGTPLAHVDARIVDEDGNAAPRGVAGELCIGGASVASGYLNRPSLTAERFVPDAAGHGARLYRTGDRSRRLPGGEFAFLGRLDDQVKIR	TACGTCATCTATACCTCGGGCTCGACCGGCCGGCCCAAGGGCGTCGTGCTGAACCATGCAGCGCTTGCCGCCTATCTGCGCGGAGTTGCCGGACGGCTGCCCGACGATATTGCCAGCGCGGCCTGGATTTCCACGCCTGCCGCGGACCTGGGCCATACGTCGCTCTTCGGGGCGCTCTGGCACGGCTGGACGCTCCACGCGATCGACGCGGAGGTGGCCGGCGATCCCGACGCGTTCGCCGCATACATGGACACGCACGCGGTCGATCTGCTGAAGATCGTGCCGAGCCATCTCGATGCGCTGATGCAGGGCCGCTCGCCCGCAGCCGCGTTGCCCCGCCGGTGCCTTGTCGTGGGCGGTGAGCCGATGCCGGCACGTCTCGCGACGCAGGTCGAGCGG…	CCCCCCCC(=O)N[C@H]([C@H](C(=O)O)O)C(=O)N[C@@H]([C@@H](C)O)C(=O)N[C@H]([C@@H](C)O)C(=O)N[C@H](CCC[N+](=NO)[O-])C(=O)NCC(=O)N[C@H](CCC[N+](=NO)[O-])C(=O)O	['Structure-based inference']	['pubmed:31605027']	Trinickia
BGC0002329	NRP	Trinickia caryophylli	trinickiabactin	nrpspksdomains_FNF07_04275_AMP-binding.2	threonine	thr	DAQASARPNAVAIAFTGDDGTRTALTYLELATWSARIAHACGPALAHGGERRIGVAMTRTPALVAAILGVLRAGAAYVPLDPAYPDDRLRDIALDAGLDALITEPSAASRFTAMLPWLPVIDANALRVAAGPSVIAAAKVPLPRVHAEQLAYVIYTSGSTGRPKGVGVTHGNVARLFDATRARFGFDERDVWTLFHSYAFDFSVWELFGALVHGGRLVIVPHWTAREPSALHALLVREGVTVLNQTPSAFVQLAQVDGEYELKTLRAVIFGGERLEPASIARWAEGARAKGVLPALVNMYGITETTVHVTYRELDEAALRAGRSVIGAPLADLTLQVLDGDLNRVPVGAVGELCVGGAGLARGYLGRPGLTAERFVPDPGGAPGARLYRSGDLARRLPD…	GACGCGCAAGCGAGCGCCCGCCCAAATGCGGTCGCGATCGCCTTTACGGGCGACGATGGCACGCGCACCGCATTGACCTACCTCGAACTGGCCACATGGTCGGCGCGCATTGCACACGCCTGCGGACCGGCGCTTGCGCATGGCGGCGAACGCCGCATCGGCGTGGCGATGACGCGCACGCCCGCGCTCGTTGCCGCGATCCTCGGCGTGCTGCGCGCCGGCGCGGCCTACGTGCCGCTCGATCCCGCCTATCCCGACGACCGGTTGCGCGACATCGCGCTCGACGCGGGTCTCGATGCGCTCATCACCGAGCCGTCGGCAGCATCGCGGTTCACCGCGATGCTGCCGTGGCTGCCCGTCATCGACGCCAACGCGCTGCGTGTCGCGGCCGGGCCATCG…	CCCCCCCC(=O)N[C@H]([C@H](C(=O)O)O)C(=O)N[C@@H]([C@@H](C)O)C(=O)N[C@H]([C@@H](C)O)C(=O)N[C@H](CCC[N+](=NO)[O-])C(=O)NCC(=O)N[C@H](CCC[N+](=NO)[O-])C(=O)O	['Structure-based inference']	['pubmed:31605027']	Trinickia
BGC0002329	NRP	Trinickia caryophylli	trinickiabactin	nrpspksdomains_FNF07_04275_AMP-binding.3	threonine	thr	MQAARRGDAIALVDGAQRVTYAQLDAWSRAIAAELLRRGAKAETRVGVAMQRSAGLVAALLGVLRAGATYVPLDPSYPHERLSHIVDDARLGPIVADTESLKQHESLFAWRPVIDVGALRDVYSDAAAEVPLPRVHAEQLAYVIYTSGSTGRPKGVGVTHGNVARLFDATRERFGFDERDVWTLFHSYAFDFSVWELFGALVHGGRLVIVPHWTAREPSALHALLVREGVTVLNQTPSAFVQLAQVDGEYELKTLRAVIFGGERLEPASIARWAEGARAKGVLPALVNMYGITETTVHVTYRELDEAALRAGRSVIGAPLADLTLQVLDGDLNRAPVGAVGELCVGGAGLARGYLGRPGLTAERFVPDPGGAPGARLYRSGDLARRLPDGDLEYLGRND…	ATGCAGGCGGCGCGACGCGGCGATGCCATTGCCCTTGTCGATGGCGCACAGCGCGTCACCTACGCCCAACTGGATGCATGGTCCCGTGCGATCGCTGCCGAACTCCTGCGGCGCGGCGCCAAAGCGGAAACCCGCGTCGGCGTGGCGATGCAACGCTCTGCCGGACTCGTCGCCGCGCTCTTGGGCGTGCTGCGGGCCGGCGCGACGTATGTGCCGCTCGATCCGTCGTATCCGCACGAGCGGCTTTCGCACATCGTCGACGATGCGCGGCTCGGCCCCATCGTCGCCGATACCGAGAGCCTGAAGCAGCACGAGTCGCTTTTCGCGTGGAGGCCTGTGATCGACGTGGGGGCCTTGCGCGACGTTTATTCCGACGCGGCGGCGGAGGTGCCGCTGCCG…	CCCCCCCC(=O)N[C@H]([C@H](C(=O)O)O)C(=O)N[C@@H]([C@@H](C)O)C(=O)N[C@H]([C@@H](C)O)C(=O)N[C@H](CCC[N+](=NO)[O-])C(=O)NCC(=O)N[C@H](CCC[N+](=NO)[O-])C(=O)O	['Structure-based inference']	['pubmed:31605027']	Trinickia
BGC0002329	NRP	Trinickia caryophylli	trinickiabactin	nrpspksdomains_FNF07_04275_AMP-binding.4	N5-nitroso-N5-hydroxyornithine	orn	AQARRTPDGVAVRCEDRALSYGQLEAWSASVAWELSSRGVGAEQRVGLCVRRGPELIAALLGVIRSGAAFVPLDPEYPAARLEQMIEDAGIERVVADAHSVKRMGQVLAGCEVVDVGQAFDAAADVDADVADAADAVAAGAGARRRTAQGFAAAVHPEQLAYVLYTSGSTGRPKGVAVSHGSLWTHLCDFLSTYGIVEADTVLHSSTINFDVALHETLPALLVGATVEMRGEQPWDLQSLSDRLVRRRVTFARIPTALWQQWQRHAPARETLSLRQVTVGGEALPGDALARWRQGPLSDIRLDNLYGPTETTIAALYRQTQASDGQEVTVPIGRPYPGRTARVVDAFGDEAPVGGLGELCIGGPTVARGYLGRAGLTAERFVPDERGEPGARQYRSGDL…	GCCCAGGCGCGGCGCACGCCGGATGGGGTGGCGGTGCGCTGCGAGGACCGCGCGCTCAGCTACGGGCAATTGGAAGCGTGGTCGGCGTCGGTGGCATGGGAGCTGTCGTCGCGCGGGGTGGGCGCGGAGCAGCGGGTGGGGCTGTGTGTGCGGCGCGGGCCGGAGTTGATCGCGGCGCTGTTGGGGGTGATCCGTTCGGGCGCGGCGTTCGTGCCGCTGGACCCGGAGTATCCGGCGGCGCGGCTCGAGCAGATGATCGAGGATGCGGGCATCGAGCGAGTGGTGGCCGATGCGCACAGCGTGAAGCGGATGGGGCAGGTGCTTGCCGGCTGTGAGGTGGTGGACGTGGGGCAGGCGTTCGACGCTGCTGCCGATGTTGATGCCGATGTAGCGGATGCG…	CCCCCCCC(=O)N[C@H]([C@H](C(=O)O)O)C(=O)N[C@@H]([C@@H](C)O)C(=O)N[C@H]([C@@H](C)O)C(=O)N[C@H](CCC[N+](=NO)[O-])C(=O)NCC(=O)N[C@H](CCC[N+](=NO)[O-])C(=O)O	['Structure-based inference']	['pubmed:31605027']	Trinickia
BGC0002329	NRP	Trinickia caryophylli	trinickiabactin	nrpspksdomains_FNF07_04275_AMP-binding.5	glycine	gly	FAAQAARVPERIAVRQRGEAFDYATLERWAAAIDARLRESGVAREERVGVCMRRTPALIASMLGVWRSGAVYVPLDPSFPAERLRFMLDDAGIARVIADEEGLTRLDGGLDGRIVIGAGEAAPTNDVAPPARWVDAAQLAYVIYTSGSTGRPKGVAVSHGALARLLASVGIVPGLTEDDVLLSVTTASFDISLLEFCLPLTKGACIELADAATAGNGAALAALIDASRATVVQATPSGWRLLLEAGWRGPAHGPFAGLAGGEPLPPDLAAQLMQRGVSLWNLYGPTETTIWSSCARVSPHESVTIGRALHANALRIVDASGALTPQGGMGELCIGGDNLARGYLGRPGLTAERFVPDPWGAPGARIYRTGDLVRERPDGEVECLGRIDQQVKLR	TTTGCCGCGCAAGCGGCACGCGTGCCGGAGCGCATCGCGGTGCGCCAGCGCGGCGAGGCGTTCGACTATGCCACGCTCGAGCGCTGGGCTGCCGCGATCGATGCCCGGCTGCGCGAAAGCGGCGTTGCCCGTGAAGAGCGCGTCGGCGTCTGCATGCGCCGCACGCCCGCGTTGATTGCGAGCATGCTCGGCGTATGGCGCAGCGGCGCTGTTTATGTGCCGCTCGATCCATCGTTTCCGGCCGAGCGTTTGCGTTTCATGCTCGACGATGCGGGCATTGCGCGTGTCATCGCCGACGAAGAGGGCCTGACGCGCCTCGACGGCGGGCTCGACGGCCGAATCGTCATCGGGGCCGGGGAAGCCGCGCCGACGAATGATGTCGCGCCGCCCGCGCGCTGG…	CCCCCCCC(=O)N[C@H]([C@H](C(=O)O)O)C(=O)N[C@@H]([C@@H](C)O)C(=O)N[C@H]([C@@H](C)O)C(=O)N[C@H](CCC[N+](=NO)[O-])C(=O)NCC(=O)N[C@H](CCC[N+](=NO)[O-])C(=O)O	['Structure-based inference']	['pubmed:31605027']	Trinickia
BGC0002329	NRP	Trinickia caryophylli	trinickiabactin	nrpspksdomains_FNF07_04270_AMP-binding.1	N5-nitroso-N5-hydroxyornithine	orn	AQARRTPDGVAVRCEERALSYGQLEAWSASVAWELSSRGVGAEQRVGLCVRRGPELIAALLGVIRSGAAFVPLDPEYPAARLEQMIEDAGIERVVADAHSVKRMGQVLAGCEVVEVGQAFDADVDVDAASTAAVGVDADADVAEAADAVAAGAGARRRTASGFAAAVHPEQLAYVLYTSGSTGRPKGVAVSHGSLWTHLCDFLSTYGIVEADTVLHSSTINFDVALHETLPALLVGATVEMRGEQPWDLQSLSDRLVRRRVTFARIPTALWQQWQRHAPARETLSLRQVTVGGEALPGDALARWRQGPLSDIRLDNLYGPTETTIAALYRQTQASDGQEVTVPIGRPYPGRTARVVDAFGDEAPVGGLGELCIGGPTVARGYLGRAGLTAERFVPDERG…	GCCCAGGCGCGGCGCACGCCGGATGGGGTGGCGGTGCGCTGCGAGGAGCGCGCGCTCAGCTACGGGCAATTGGAAGCGTGGTCGGCGTCGGTGGCATGGGAGCTGTCGTCGCGCGGGGTGGGTGCGGAGCAGCGGGTGGGGCTGTGTGTGCGACGCGGGCCGGAGTTGATCGCGGCGCTGTTGGGGGTGATCCGTTCGGGCGCGGCGTTCGTACCGCTGGACCCGGAGTATCCGGCGGCGCGGCTCGAGCAGATGATCGAGGATGCGGGCATCGAGCGAGTGGTGGCCGATGCGCACAGCGTGAAGCGGATGGGGCAGGTGCTTGCCGGCTGTGAGGTGGTGGAGGTGGGGCAGGCGTTCGACGCTGATGTCGATGTTGATGCTGCTTCCACTGCCGCT…	CCCCCCCC(=O)N[C@H]([C@H](C(=O)O)O)C(=O)N[C@@H]([C@@H](C)O)C(=O)N[C@H]([C@@H](C)O)C(=O)N[C@H](CCC[N+](=NO)[O-])C(=O)NCC(=O)N[C@H](CCC[N+](=NO)[O-])C(=O)O	['Structure-based inference']	['pubmed:31605027']	Trinickia
		Mycetohabitansrhizoxinica	rhizomide	Leu-rhizomide-Mycetohabitansrhizoxinica-A1		leu	SYTQLNAQANRLAHQLIELGVKPDVRVAICVERSPALVVGLLAILKAGGAYVPLDPSYPGERLAHILGNAEPNMVLADAAGRTALGEAALAECTVLDPATLPALPDTNPSVAELTARHLAYVIYTSGSTGTPKGVMVEHRNVANLCAWHNRKFGVQSGCRSAFMAGMAFDASAWELWPSLIGGGMLSIPSQAVCEQVLALLQWWQQQLLDVAFLVTPLAEMALADQRTPAGLRYLLTGGERFPGVTRALPAGLTLVNQYGPTEATVVATSGQLSAEDTLPHIGRPIDNTRIYILDAYRQPVPLGAVGELYIGGTGVARGYLNRPELTAERFVPDPFSEDADARLYKTGDLARYLPDGNLEFVGRNDDQVKIRGFRIEPGEIEACLMAHSQVRDAVVL			['cor']		Mycetohabitans
		Mycetohabitansrhizoxinica	rhizomide	Thr-rhizomide-Mycetohabitansrhizoxinica-A2		thr	SYAQLNAQANRLAHQLIELGGVKPDIRVAICVERSPALVVGVLAILKAGGAYVPLDPAYPSERLAYILADAAPNIVLADAAGRAALGDAVIAECTVLDPATLPALPDTNPSVAELTARHLAYVIYTSGSSGTPKGVMVEHAQVVRLFEATQPWYGFNEHDTWCLFHSFAFDFSVWELWGALRYGGKLVIVPHPIARSADAFYPLICEQGVTVLNQTPSAFKALMASQAHSALSDQLRYVILGGEALEPTLLQAWYATHDERHPQLFNMYGITEATVHVTYRPLRQQDSEQAGSPVGTRIPDLTIYLLDAHGQPVPLGAVGELYIGGAGVARGYLNRPELTAERFVHDPFSEDADARLYKTGDLARYLPDGNLEFVGRNDEQVKIRGFRIEPGEIEACLT…			['cor']		Mycetohabitans
		Mycetohabitansrhizoxinica	rhizomide	Tyr-rhizomide-Mycetohabitansrhizoxinica-A3		tyr	SYAQLNAQANRLAHQLIELGVKPDARVAICVQRSPVLVVGLLAILKAGGAYVPLDPSYPGERLAYILADAAPNIVLADTAGRAALGEAALAERTVLDPATLSALPDTNPSVAGLTARHLAYVIYTSGSTGMPKGVMVEHRGVVNLALAQIACFGVQPASRMLQFASFSFDASASEIWMAFGSGAALYLPPEAARQDRHALWDYLASHAITHATLPPALLQHGADLPSFGLSLTLILAGEAPSATLVRDLADQGTVFNAYGPTETTVCATAWRGARDFSGEVPIGRPIANTRIYLLDAYGQPVPLGAVGELYIGGAGVARGYLNRPELTAERFVRDPFVDEPDARMYKTGDLARYLPDGNLEFLGRNDEQVKIRGFRIEPEEIEACLTAHPQVRDAVVV			['cor']		Mycetohabitans
		Mycetohabitansrhizoxinica	rhizomide	Ala-rhizomide-Mycetohabitansrhizoxinica-A4		ala	SYAQLNAQANRLAHQLIELGVKPDTCVAICVQRSAALVVGLLAILKAGGAYVPLDPSYPGERLAHILADAAPNIVLADAAGCAALGEMALAECTVLDPTTLPALPDTNPSIAELTARHLAYVIYTSGSTGTPKGVMVEHAQAVNFLCWAVQTFTPLETQHTLFATSISFDLSVYECFVPLAQGSTVHLVKDALALMHQTQPVSLINTVPSALQSLLAHRANLSSATTINLAGEPLTARFIQQIFEQTPIQRLCNLYGPSESTTYSTWLSIQRGEALIESIGRPIANTRVYLLDAHGQPVPLGAVGELYIGGAGVARGYLNRPKLTAERFVRDPFVGEPDARMYKTGDLARYLPDGNLEFLGRNDEQVKIRGFRIEPGEIEACLTAHPQVRDAVVL			['cor']		Mycetohabitans
		Mycetohabitansrhizoxinica	rhizomide	Val-rhizomide-Mycetohabitansrhizoxinica-A7		val	SYAQLNAQANRLAHQLIELGVKPDTCVAICVQRSAALVVGLLAILKAGGAYVPLDPSYPGERLAHILTDAAPSIVLADAAGRAALGEAALAECTVLDPATLPALPDTNPSVAGLTARHLAYVIYTSGSTGTPKGVMVPHHAIARLVINNDYVDICTGDRVAFAANPAFDASTFEVWAPLLNGATVVVIDHDTVLMPAAFAHTLREQHISILWLTVGLFNQMAAQVDTAFSQLKVLIVGGDVLDARLVARVMRESPPEQLINGYGPTESTTFATTYKITSVPETNASLPIGRPIANTRVYLLDAHGQPVPLGAVGELYIGGAGVARGYLNRPELTAERFVRDPFSDEADARLYKTGDLVRYLPDGNLEFLGRNDDQIKIRGFRIEPGEIEACLTAHPQVR…			['cor']		Mycetohabitans
		Mycetohabitansrhizoxinica_1	Holrhizin	Phe-Holrhizin-Mycetohabitansrhizoxinica-A2		phe	SYAELNARANRLAHQLIELGVMPDARVAICVQRSPAMVVGLLAILKAGGAYVPLDPSYPGERLAHILADAAPNIVLADAAGRAALGGAALTDRTVLDPNWLPAQAETNPVVPDLTSRHLAYVIYTSGSTGTPKGVMVEHRGVVNLAQAQIACFDVHATSRIVQFASFSFDASVFEIFMALGCGASLHLPSDGVRYDRYRLWQYLTECGITHVTLPPALLQEGRDLPRLNQPLTAILAGEAPSVALFHNLMNQGVVVFNAYGPTETTVCVSAWRGLNLFNGKVLPIGRPLANTRVYLLDAHGQPVPLGAVGELYIGGAGVARGYLNRPELTAERFVRDPFASEPDARMYKTGDLARYLPDGNLEFLGRNDHQVKIRGFRIELGEIETCLVQHAQVHEAVVL			['cor']		Mycetohabitans
		Mycetohabitansrhizoxinica_1	Holrhizin	Glu-Holrhizin-Mycetohabitansrhizoxinica-A3		glu	SYAELNDKANQLAHYLRALDVGPEVVVGLCAERSLEAIIGLLGILKAGGAYLPLDPSHPAERLASMLRQASVAVLVTQSHLEARLPEIQARRIDLDTDWAKIAACPKTRLDSGVTAEHLAYMIYTSGSTGQPKGVMHSHRGVVNYLSFLTRHYAITCADTILNITGLAFDPCVRDLFGPLTAGARVIILPNEQAKEPGRYLSAIRERSVTKLLSITPSFLRSLCETVPAGPIASSLNTILTSGEPLEASVCEQVHKAFGLQVTVVNQYGPSECTMASTWFKADAQQEGRVPIGRPVPNVRVYVLGRHLEPLPIGVTGELYIAGAGVARGYINQPELSAERFIPSPFGPGERLYRTGDLARWRLDGQLEYIGRLDQQIKIRGFRIEPGEIEAALVKHPSI…			['cor']		Mycetohabitans
		Mycetohabitansrhizoxinica_1	Holrhizin	Ile-Holrhizin-Mycetohabitansrhizoxinica-A4		ile	SYAELNARANRLAHQLIELGVVPDARVAICVQRSPALVVGLLAILKAGGAYVPLDPTYPSERLAHILVDAAPSIVLADAAGRAALGEAALAECTVLDPATVPALPDTNPSVASLTSRHLAYVIYTSGSTGVPKGVMVHHQGVVRLVRNTDYIKVEPGAVFALASNLAFDATTFEIWTPLLNGARIEVIERETLLSPAMLSRKLKQSGVTVLFLTTALFNQMVKEKVEAFSDLHYLLFGGENADPRCVFRVLQQAKPRHLLHVYGPTETVTYASWYEVSNVKQDTSIPIGRPIANTRIYLLDRYGQPVPLGAVGELYIGGAGVARGYLNRPELTAERFVHDPFASEPDARMYKTGDLARYLPDGNLEFLGRNDHQVKIRGFRIELGEIETCLAQHTQVRD…			['cor']		Mycetohabitans
		SchlegelellabrevitaleaDSM7029	Glidonin	Asn-Glidonin-SchlegelellabrevitaleaDSM7029-A2		asn	FEAQAAQTPDAVAVRDDVCQLSYRELNARANQLARYLRAHGVGPDRRVAICTERSAGLIVALLGVLKAGGAYVPLDPGYPAERINDMLEDAEPTVILTEARLQAALAGKAAHVVALDAQWPEILLHREADLEQHEVGLLPRHLAYVIYTSGSTGRPKGVMIEHAAWLNYLQWAVRAYECHAGEGAVVSSSIAFDATITSLYTPLLCGRTVVLVRDGDELAGLEALLRQGKAWSLIKITPAHLDALGRRLQANPAPCAVRAFVIGGEALAPATVALWRGICPQARLINEYGPTETVVGCSVYELPADTSDLVTVPIGRPIANTQIYLLDERRQPVPIGVPGEIYIGGAGVARGYLNRPELTAERFVPDPFSEVPNAKLYKTGDLGRWRADGHLEYLGRND…			['cor']		Caldimonas
		SchlegelellabrevitaleaDSM7029	Glidonin	Pro-Glidonin-SchlegelellabrevitaleaDSM7029-A3		pro	FEAQARRCPDAAAVVYGGDRLSYADLNARANRLARELRAQGVGPDTPVAVCMERSLEMVVALLGILKAGGAYVPLDPAYPTERLEYMLADAAPTVVITQARLRGRVATAARVLALEAGGPPVEAQEAGDVEAASIGLAPHHLAYVIYTSGSTGTPKGVAMPHSALVNLLKWQRAALRSGKPQRTLQFAALGFDVAFQETFTTLATGGTLVMIPEAVRGDPVALVRLLHEQAVQRVFLPFVALHHLAEAMVASSQALPCLEDVITAGEQLRITPAIAALFKSQPGCRLHNHYGPTESHVVTALSLPEEVERWPELPTIGTPIANARLYILDERRQPVPIGVTGEIYIGGVAVARGYLNRPELTAERFVADPFSAEPQAQMYRTGDLGRWRADGQIDYLGR…			['cor']		Caldimonas
		SchlegelellabrevitaleaDSM7029	Glidonin	Trp-Glidonin-SchlegelellabrevitaleaDSM7029-A7		trp	FEAQVRRCPDAVAVVFEGRQLTYAELNARANQLARHLRERGIGPDALVAICVERSLDMVVGLLGILKAGGAYVPLDPAYPDERLQHMLQDAAPRVVLTQARLRAGLATTAQVVVLDDDAPLIARQDDSNLDPGAIGFKAHHRAYVIYTSGSTGTPKGVMVTHANLVNLLHALQPSYGLDEEDRVLQFVATSFDVAAQEIFGSLHRGATLVLRTEQWIGDADVFWSLCASHRITVLHLPAAYWQQVVLGAPPRLPDALRLVVVGGERMSASALSAWFARSGHRPTLINQYGPTETTVSATFHTVTRAEEGACIGRPIANTQVYLLDEQRQPVPVGVVGEIYIGGAGVARGYLGRPERTAERFSNDPFSAEPNARMYKTGDLGRWRADGNIEYLGRNDHQV…			['cor']		Caldimonas
		SchlegelellabrevitaleaDSM7029	Glidonin	Ser-Glidonin-SchlegelellabrevitaleaDSM7029-A11		ser	FEAQVARTPHATALIHGEQGVSYAELNARANRLAHHLRRLGVRPDSRVALCVERSVEMVVGLLAVLKAGGGYVPLDPEYPVERLRHMLQDSGPIVVLVDTAGREALEQADDRNLERVPRLHLQADAGQWAEAPAHNIDAATLGLKPTHLAYVIYTSGSTGRPKGVMNEHRGVVNRILWMQDAYPLDERDVVLQKTPFSFDVSVWEFFWPLMAGARLVMARPEGHKDPAYLSEVIRRTGVTTLHFVPSMLQVFLAHEQAANCRSVVRVMCSGEALPASLVHTFHERLPRAELHNLYGPTEAAVDVTAWACQAGDDSTVIPIGRPIANTRLYILDEHLQPVPVGVAGELYIGGVQVARGYLNLPELTAERFIDDPFSAEPNARMYKTGDLGRWRSDGNIEY…			['cor']		Caldimonas
		SchlegelellabrevitaleaDSM7029_1	Glidopeptin	Gln-Glidopeptin-SchlegelellabrevitaleaDSM7029-A2		gln	FEAQVQRTPDAVAVIDGDVQLRYADLDRRANQLAHYLRAQGIGPEQRVGVALERNAQMLVAVLGILKAGAAYVPLDPAYPNARLAYLLADAEPALVLTQASLLEVLPAQALVALDTQWPEIAAYPDTAPSWPTSRPDQLAYVIYTSGSTGQPKGVMVEHRSVVNLWWGLEQRIFRDHPACRRVSLNAPIAFDASVQQWVQLLSGRTLVLVPEAVRRDPVALRDFLNEQQVDVFDCTPSQLALMQADGHEVSPVFPRVTLVGGEAIPAALWQSLAARPGQACYNVYGPTECTVDTTCAPITADVSVPHLGRPLANARVVLLDARLAPVPLGVAGEIYIGGAGLARGYLNQSELTAERFVQDPYRPGQRLYKTGDLARRLPDGRLEYLGRNDFQVKVR			['cor']		Caldimonas
		SchlegelellabrevitaleaDSM7029_1	Glidopeptin	Dab-Glidopeptin-SchlegelellabrevitaleaDSM7029-A3		dab	FEAQAEHAGECLAVDDGRQRLGYAELNRRANQLAHHLRYLGVGPDTRVALCAERGAEMVVALLAIFKAGGAYVPLDRDYPGDRIAYMLQDSAPVVLLCSPATREVVAPHRPPGLPLLDLHADAPCWQDAPSHNLSPQAIGLTSAHLAYVIYTSGSTGRPKGVMIEHRGLVNYSLDAIRWFGLAPDDRVLQQNSLNFDLSIEEMLPALLAGATLVPSDELFGLQDGRHPGRPSVVHLTAAHWHQLVGEWSGAGLGRPAALAGVRLVNVTGDALAVQKLRQWDTLAPPETRLINTYGPTEITVSCSAAYVRHDPRASRVSIGRPFANTCLYILDERREPVPVGVAGELYIGGAGVARGYLNLPDLTAQRFLQDPFNPGQRLYKTGDLARWRPDGEVEFIGR…			['cor']		Caldimonas
		SchlegelellabrevitaleaDSM7029_1	Glidopeptin	Lys-Glidopeptin-SchlegelellabrevitaleaDSM7029-A4		lys	FESQAAQRPDALALVQGGHTLRYGELNAEANRLAHHLRQLGVGADDRVALYATRSVDTIVALLAILKAGAAYVPLDAGYPAERLVHMLRDSAPVALLTQGGAPAWVHEALGEGVPVLDLQADAAAWQQHDERDLGPSHTDEGHHHLAYVIYTSGSTGRPKGVMVEHRSVVNQVTALARRIALQPTERVLQFASLSFDASVEEVFATLTHGATLVLRSDEWLSDAGRFWALCEAHGIAVVDLPTQFWAQLALEQQPVPSTVRQVIIGGEAVSERALQAWFSTPGHRPRLLNTYGPTEATVSATWHEATGETQDARTIGRPSEGTRVYILDAHRRPVPIGVPGELYIGGVQVARGYLNLPEQTAERFLANPWWPGERLYKTGDLGRWWPDGRVEYLGRNDF…			['cor']		Caldimonas
		SchlegelellabrevitaleaDSM7029_1	Glidopeptin	Asp-Glidopeptin-SchlegelellabrevitaleaDSM7029-A10		asp	FEAQVRRTPAALAGVCGDRPLSYRELNARANQLARELRARGVGPDRLVAVCAERGVDLMVALLGVLKAGGAYVPLDPGYPAQRLQHMLEDAAPSVLLTQRHLEPLLPAHGAEVLRLDEDWPRIARHDDGDLDTQAVGLSPRQLAYVLFTSGSTGRPKGVMIEHRSIVNYACHAARQFDVQNGHGSLVFTSFSFDLTLTSVYPPLLCGRPVRLCPEGNDLAVWREQLLAGRELAPVKLTPSHLALLQQALPADAVAGRIRTLVLGGEPLKGAALQWWREQAPEMRIFNHYGPTEATVGCVVHEVTGPLPDGAVPIGRPITHMRIYVLDALRQPVPVGVLGEIYIGGAGVARGYLGRPDLTEERFLPDPYAAEADARMYRTGDVARWRADGTLEYLGRNDH…			['cor']		Caldimonas
		SchlegelellabrevitaleaDSM7029_1	Glidopeptin	Gly-Glidopeptin-SchlegelellabrevitaleaDSM7029-A11		gly	FEAQAQRTPDATALVCGEQRYSYAELNRRANQLAHHLRGLGAGPDGLVALAVERSPEMVVGVLGILKSGAAYVPLDPAYPADRLAYMVEDARPLCLLTQRSLQSLLPAGGVPQVLLDEQWPEIAAGATSNPAVSGLSPHHLAYVIYTSGSTGRPKGVMVEHGNVVNFLLSMSQAPGIRADDVLLAVTSLSFDIAGLELFLPLLCGARIVLATREDAADAERLRALMERWAVSIMQATPSTWRLLMQQDWPVLPRPLKVLCGGEALPVNLAEQLLERVPEVWNLYGPTETTIWSTLARLTEAAPHIGRPIANTRVYVLDAAQQPVPVGVPGELYIGGVGVTRGYLGRPELTAERFVQDPFEPGQRLYRTGDLARWQPDGTLAYLGRNDFQVKLR			['cor']		Caldimonas
		SchlegelellabrevitaleaDSM7029_2	Glidomide	His-Gldiomide-SchlegelellabrevitaleaDSM7029-A1		his	ERQARLGPDRPAVACADGRLDYDTLVRRADVLAARLVAAGAAPDRIVAVCLPRSVDLVVALLAVLKSGAAYLPLDPGYPPERLDYMQHDSGACCLVADARSAAIAAAGLPVVLIGAPAPAALPNVPPRPPHPDQLAYVIYTSGSTGRPKGVAITHRNACHSTLARHRWYERPVSAYLMLSSVAFDSSVAGIFWTLTQGGLLVLPEDDAHRDVAALARLVEHHRASHLLALPSLHAQLLDAEPARLATLTDVIVAGEACSATLVEAHHRVLPQAALYNEYGPTEASVWSLAHATRPGEDPVPIGRPIPFIEAWVLDTALQPLPPGVQGELYLGGPALARGYLGRPDLTADRFVPHPTAAGQRLYRTGDRVRLNAAGQAEFLGRTDQQVKIR			['cor']		Caldimonas
		SchlegelellabrevitaleaDSM7029_2	Glidomide	Arg-Gldiomide-SchlegelellabrevitaleaDSM7029-A6		arg	FAQRAVRMPDQVAVVLDGQQLSYRELNERANTIAHRLLAAGVTAETRVGLCVERSLEMVAGLLGILKAGGAYVVLDPALPVERITELCEDAAIAVVLGQTVLSGMTAALPRRIVTLAIDKLVQPDVPRHDPDLRLDPRQLAYLVYTSGSTGRPKAVAVPHAALVAHVQAMAERFGLTASDRVLQFSTLSFDASVDQLFPALLSGATVVLRGPQLWDSGELRERLARERITVADFPTSYWMQALREWSRATGPECSALRLVSVGGEALPPDALTLRAAAGLAHARLLNAYGPTEATVTAALHDCDAAPHPDDTAGIPIGRPVPGRELHVLDDALRPVAVGVAGELYIGGELLARGYHGRADLTAERFLPDPFGAPGTRLYRSGDRVRWRADGRLEYLGRG…			['cor']		Caldimonas
		ChitinimonaskoreensisDSM17726_1	Chitinimide	Cys-Chitinimide-ChitinimonaskoreensisDSM17726-A7		cys	FERQAQATPDAVAVLAPRRQLSYAALRREARRLAAQLQARGVRPNQLVAVRMERGWEQVVATLAVLYAGGAYLPLDPALPAERTAHILERAEARLALVQPATAGLAGLPAGVEAIVVEPAAVDGGGEVELQAAEVAGLAPHHLAYVIYTSGSTGLPKGVMIDHRGAVNTLLDINARFAIAPADRVLAVSSLSFDLSVFDFFGTLAAGAAVVLLEPELARDPAHWLELVRAHRVSVWNSVPALLGMLVEYAESGHPLPACLRLAMLSGDWIPLALPQRLRACLPAVRIDSLGGATEASIWSIHYPIGEVDPAWRSIPYGKPLAGQQFHVLDDAMRQRPAWVPGQLYIGGIGLALGYWRDEARTAASFVRHPATGERLYRTGDLGRYLPDGNIEFLGREDG…			['cor']		Chitinimonas
		ChitinimonaskoreensisDSM17726_1	Chitinimide	Met-Chitinimides-ChitinimonaskoreensisDSM17726-A8		met	AQAKATPDVLALVCDGERLSYAELNRRANRLAHALRARGAGPDLRIGLHAERSAALVVGLLGILKAGAAYLPLDPSLPAERLAAMVEDAAPALVLSDAAAPPAGWQSLAALAAAGERDDDPADLVQPGNLAYVIYTSGSTGRPKGVAVAHASVANLLDHWLERVGAAPGEAAALWSSFGFDVSVQEILLPLTSGGTLHLVPEAIRTDPAALLDWMRERRIVQGYLPPAFVKWIAEAPEERLAGLALRQLLVGVEPLPEQGLHRMRELLPDLAIVNGYGPTESCVYSSAYLDIRPLARQCPIGRPLANTRIYLLDERLEPVPLGVSGEIHIAGEGLARGYLGRPGATAERFVPDPFGPPGACMYRSGDLARQLPGGDLEYLGRRDHQVKLR			['cor']		Chitinimonas
		Variovoraxboronicumulans	Variochelin	Nδ-acetyl-Nδ-hydroxyornithine-Variochelin-Variovoraxboronicumulans-A5		orn	VERQAALRPEATALIVDGVPMSFRDFDMRANRLAHALIAQGVQPEDRIGLAVERSPEMVVALLGVLKAGAAYVPLDPDYPPDRLDFMAADSGVRLLLTQARVRERLGASMQALPALLLDGGVLDSGPDGAPDVAVHPEHLAYVIYTSGSTGQPKGVAVAHGPLSMHIQTIGRAYGMTPEDRELQFASINFDGAHERIWTPLAFGATLMPRSQELWTVHRSCEEMRRHGITVACFTPGYLQQMADELGEDGRVPTLRSYTVGGEAMGRVACERVMQTLQPPRLINGYGPTETVITPTIAKAYAGTAFDAAYLPIGAPVGDRRAVVLDTDMNLVPPGMAGELYLGGSGLARGYLNRAGLSAERFVADPFDAKGGRLYRTGDLVRWRADGQLEYLGRLDHQV…			['cor']		Variovorax
		Burkholderiagladiolipv.agaricicola	Haereogladin	Hpg-Haereogladin-Burkholderiagladiolipv.agaricicola-A4		hpg	FEAQAARTPDAPALVDGARSLDYGTLDALANRLARHLAAAGVAAGERVAILLDRSIELILAELAILKCGAVYVPLDRNAPAERQAFMLADCGARCLLSLSGHAAPDLAALQRIDIDAVLAGADAEAQPDAPPPAASAGGDQAAYIMYTSGSTGQPKGVIIAHRGINRLVVNNGYAEFAPSDRIAFTSNPAFDASTMEVWGALLHGACLVVVPHEALLSAPRLAELLQAERVNILHLVAGLLSSHADALAPVFPRLRYLLTGGDAADVRAVQRIMRNGAPQHLVHCYGPTESTTFATTYTLRAGDEPMERLPIGRPISNTRVYLLDRFGEPAPVGVPGELHVGGKGVALGYLNLDALSAERFVRDPFAPAGDSAARMYRTGDLARYLPDGNIEYLGRNDG…			['cor']		Burkholderia
		Burkholderiagladiolipv.agaricicola	Haereogladin	p-aminobenzoate(PABA)-Haereogladin-Burkholderiagladiolipv.agaricicola-A5		paba	FARQLAERPDAPACVFEGEVASYAELDRLAGRIARALHRRGIGAGTRIALHYPRSTGFVAAILAAFRLGAAYVPIDPGYPAAYVRRTLDDAMPAAIVTTAALAPSFEAGGAPVLRLDVEADLEADLESGEFDAQPPFEAAAIRPDDLAYIAYTSGSTGQPKGVMVEHRQLMNCLQALWERTPYAADEVVAQKTSMSFVPSIKEMLSGLLAGVPQVILPDAVVKDAPAFAAALQAHGVTRLNLVPSHLAVLLEHAGQLGALRHVTTAGEPLSRRLARRFAATLPRARLHNNYGCSELNDISYGEGAELAALHAVAPAGRPIANCRVYLLDERLAPVPVGAVGMLHVEGDPVGPGYWNRPDLTAERFVRHPATGAWLLRTGDLGLWLADGQLLHLGREDFQ…			['cor']		Burkholderia
		BurkholderiaplantariiDSM9509	Plantaribactin	Gra-Plantaribactin-BurkholderiaplantariiDSM9509-A5		gra	ASVAHDGARLALRDGARTMSYAELDAAADALAARLVTLGIGTEARVAVLAERSIEHVLAMLAALKAGATWLPLDPRAPAARLSAQLADSGAAVLLHAVPLPDGVEPAAAVPLAFRHETPAAVCAPRVSPPLRHADRAAYMIYTSGSTGEPKGVVVTHRALANYVRGMLATLDAPADASFAMVSTPAADLGHTTLFGALASGRTLHLIAPDLVFQPDAFARYMAAHRIGVLKIVPSHLAALLSAARPEQVLPAAALIVGGERTPAALLARITVLAPACRVFNHYGPTETTVGVAMHAWPADAAPTRDLPLGRALPGMRIHLLDANLARVADGEDGELYVGGPGVARGYHGRAGLTAERFVPDPFLAGERLYRTGDLGRIGADGLLEYRGRADDQVKVR			['cor']		Burkholderia
